# Supplementary material for: Identification of Potential Druggable Targets and Structure-Based Virtual Screening for Drug-like Molecules against the Shrimp Pathogen Enterocytozoon hepatopenaei
Source: Int J Mol Sci. 2023 Jan 11;24(2):1412. doi: 10.3390/ijms24021412 (PMC9867128; doi:10.3390/ijms24021412)
Supplement: Supplementary file 1 [file ijms-24-01412-s001.zip]

Archive with 19 entries (19 files):
- Figure S1.png
- Figure S10.png
- Figure S2.png
- Figure S3.png
- Figure S4.png
- Figure S5.png
- Figure S6.png
- Figure S7.png
- Figure S8.png
- Figure S9.png
- Table S1.xlsx
- Table S2.xlsx
- Table S3.xlsx
- Table S4.xlsx
- Table S5.xlsx
- Table S6.xlsx
- Table S7.xlsx
- Table S8.xlsx
- Type of the Paper.pdf
