# Supplementary material for: Identification of Potential Druggable Targets and Structure-Based Virtual Screening for Drug-like Molecules against the Shrimp Pathogen Enterocytozoon hepatopenaei
Source: Int J Mol Sci. 2023 Jan 11;24(2):1412. doi: 10.3390/ijms24021412 (PMC9867128; doi:10.3390/ijms24021412)
Supplement: Supplementary file 1 [file ijms-24-01412-s001.zip › Table S1.xlsx]

## Sheet: Aquaporin
Table S1. Docking-based VS of the compounds from ChEMBL and ZINC15 databases
ID	SMILES	MW	logP	Affinity	numAtoms	numRings	numRotBonds	numHDon	numHAcc
CHEMBL564320	OCCSC[C@H]1O[C@H]([C@H](O)[C@@H]1O)n2cnc3c(O)ncnc23	328.084	-1.123	-6.5	22	3	5	4	10
ZINC000006657992	N/N=C(\N)c1nonc1/C(N)=N/O	185.066	-2.257	-5.4	13	1	2	4	7
CHEMBL361672	Cc1cc(N)c(C(=O)CCc2ccc3ccccc3c2)c(O[C@@H]4O[C@H](CO)[C@@H](O)[C@H](O)[C@H]4O)c1	467.194	1.725	-7.5	34	4	7	5	8
CHEMBL1207374	O[C@H]1[C@@H](O)[C@@H](O[C@@H]1COP(=O)(O)O)n2cnc3C(=O)NC=Nc23	348.047	-2.152	-7.2	23	3	4	5	9
CHEMBL183199	Cc1ccc(N[C@@]23C4OC[C@@H](O)C4OC2C5(COC6[C@H](O)COC56)Nc7ccc(C)cc37)cc1	466.21	1.461	-6.2	34	7	2	4	8
CHEMBL2314140	C[C@H](NC(=O)c1cnc2C(=O)NC(=Nc2n1)N)C(=O)N[C@@H](Cc3ccccc3)C(=O)O	425.145	-0.774	-6.7	31	3	7	5	8
ZINC000257308668	Nc1ncnc2c1ncn2[C@H]1CCC[C@H](NC(=O)CC[C@@]2(c3ccc(F)cc3)NC(=O)NC2=O)[C@@H]1O	496.198	0.633	-6.6	36	5	6	5	9
CHEMBL511410	NC(=O)C(NC1=C(Nc2ccncc2)C(=O)C1=O)c3cccc(O)c3	338.102	0.765	-7.6	25	3	6	4	7
CHEMBL1981389	CC1=NN(C2OC(CO)C(O)C(F)C2O)C(=O)NC1=O	291.087	-2.81	-6.6	20	2	2	4	8
ZINC000239038889	C[C@H](O)[C@H](O)[C@H](O)[C@@H](O)[C@@H]1NN=C(c2ccccc2)S1	298.099	-0.526	-6.7	20	2	5	5	7
ZINC000199410852	Cc1c2c(c(O)c3c(O)cccc13)C(=O)O[C@@H]2[C@@H]1[C@H](O)C(=O)C(C(N)=O)=C(O)[C@H]1N(C)C	442.138	0.558	-7	32	4	3	5	9
ZINC000025585147	COc1ccc([C@@H](O)[C@@H](NN=C(N)N)c2nc3ccc([N+](=O)[O-])cc3[nH]c2=O)cc1	413.145	0.393	-7.5	30	3	7	5	8
CHEMBL2112139	N[S+]([O-])c1nc(N)nc2c1ccn2[C@@H]3C[C@@H](O)[C@H](CO)O3	313.084	-1.365	-6.8	21	3	3	4	9
CHEMBL1899113	OC[C@H]1O[C@H](OCCc2ccc(O)cc2)[C@H](O)[C@@H](O)[C@@H]1O	300.121	-1.249	-6.7	21	2	5	5	7
ZINC000011851965	COc1ccc(CC(=O)c2ccc(O[C@H]3O[C@H](CO)[C@@H](O)[C@@H](O)[C@@H]3O)cc2O)cc1	420.142	0.005	-5.9	30	3	7	5	9
ZINC000012134680	Cc1c(C(=O)NC(C)(C)CO)sc2ncnc(N[C@H]3CCCCNC3=O)c12	391.168	1.581	-6.7	27	3	5	4	7
CHEMBL2164654	CCNC(=S)N\N=C/c1cc(cc(\C=N/NC(=S)NCC)c1O)C(=O)OCC	424.135	1.205	-6.5	28	1	8	5	7
ZINC000008991673	CC(CO)(CO)NC(=O)COc1cc(O)c2c(=O)cc(-c3ccccc3)oc2c1	399.132	1.404	-6.8	29	3	7	4	7
ZINC000100135117	OC[C@@H]1O[C@H](n2cnc3c2ncnc3/C=C(/O)c2ccccc2)[C@H](O)[C@@H]1O	370.128	0.494	-6.8	27	4	4	4	9
ZINC000075260902	O=c1[nH]cnc2nc(N3CCCCC3)n([C@H]3O[C@@H](CO)[C@@H](O)[C@H]3O)c21	351.154	-1.279	-7.4	25	4	3	4	9
ZINC000013520562	O=[N+]([O-])c1ccc(S[C@@H]2O[C@H](CO)[C@H](O)[C@H](O)[C@H]2O)cc1	317.057	-0.513	-6.4	21	2	4	4	8
ZINC000257524662	O=S(=O)(O)O/N=C(\Cc1ccccc1)S[C@@H]1O[C@H](CO)[C@H](O)[C@H](O)[C@@H]1O	409.05	-1.105	-7.2	26	2	6	5	10
CHEMBL612104	Nc1ncnc2c1c(I)cn2[C@@H]3C=C(CO)[C@@H](O)[C@H]3O	388.003	-0.187	-6.4	20	3	2	4	7
CHEMBL3616858	Nc1nnc(S[C@H]2C[C@](N)([C@H]3[C@@H]2[C@@H]3C(=O)O)C(=O)O)[nH]1	299.069	-1.02	-6.9	20	3	4	5	7
ZINC000013023229	COc1ccccc1-c1nnc(SCC(=O)Nc2ccc3[nH]c(=O)[nH]c3c2)n1N	411.111	1.568	-7.6	29	4	6	4	8
CHEMBL2013032	Cl.COC(=O)[C@H](C)NC(=O)[C@H](CC(C)C)NC(=O)CN1CCCNCCCNCCC1	463.293	0.282	-5.5	31	1	8	4	7
ZINC000004255712	Cc1cc([N+](=O)[O-])ccc1N[C@H]1O[C@@H](CO)[C@@H](O)[C@@H](O)[C@@H]1O	314.111	-0.885	-6.7	22	2	4	5	8
ZINC000101760750	COc1ccc(-n2c(=O)[nH]c(O)c(/C=N/c3ccc(O)c(C(=O)O)c3)c2=O)cc1	397.091	1.394	-6.2	29	3	5	4	8
CHEMBL1975088	CCOC(=O)\C=C\C1=CNC(=O)NC1=O.CCOC(=O)\C=C\C2=CNC(=O)NC2=O	420.128	-0.721	-5.9	30	2	6	4	8
CHEMBL3900029	COc1ccc(CNc2nc(NC3CC3)n4ncc(\C=C\5/NC(=O)NC5=O)c4n2)c(OC)c1	450.176	1.508	-7.4	33	5	8	4	10
ZINC000005605512	NC(=O)c1[nH]cnc1/N=N/SC[C@H](N)C(=O)O	258.054	-0.348	-5.6	17	1	6	4	7
CHEMBL1163501	CC(=CCNc1nc(N)nc2c1ncn2[C@@H]3O[C@H](CO)[C@@H](O)[C@H]3O)C	350.17	-0.602	-7.1	25	3	5	5	10
ZINC000085880038	COc1cc(/C=C2/Oc3cc(O)ccc3C2=O)ccc1O[C@@H]1O[C@H](CO)[C@H](O)[C@H](O)[C@H]1O	446.121	0.196	-6.8	32	4	5	5	10
ZINC000071757370	Cc1cc(=O)oc2cc(O[C@@H]3O[C@@H](C(=O)O)[C@H](O)[C@@H](O)[C@H]3O)ccc12	352.079	-0.628	-7.5	25	3	3	4	8
ZINC000001727262	O=C(NCCNC(=O)c1cccc([N+](=O)[O-])c1O)c1cccc([N+](=O)[O-])c1O	390.081	1.074	-7.7	28	2	7	4	8
ZINC000033727601	C=CC/C(=N\OS(=O)(=O)O)S[C@H]1O[C@@H](CO)[C@@H](O)[C@@H](O)[C@H]1O	359.034	-1.771	-6.7	22	1	6	5	10
CHEMBL3953842	NS(=O)(=O)NCCCNc1nonc1\C(=N\O)\Nc2ccc(F)c(c2)C(F)(F)F	441.084	1.071	-7.7	29	2	8	5	8
CHEMBL608790	OC[C@H]1OC([C@H](O)[C@@H]1O)n2cnc3c(NCc4ccc(Cl)cc4Cl)ncnc23	425.066	1.357	-7.3	28	4	5	4	9
ZINC000216307393	CC(=O)N[C@H]1[C@@H](Oc2ccc3oc(=O)sc3c2C)O[C@H](CO)[C@H](O)[C@H]1O	385.083	-0.515	-6.7	26	3	4	4	9
ZINC000009120278	CNC(=O)NC(=O)[C@H](C)OC(=O)[C@H](NS(=O)(=O)c1ccc(F)cc1)[C@H](C)O	405.101	-0.759	-6.6	27	1	7	4	7
ZINC000035457013	CNc1ccccc1C(=O)O[C@@H]1O[C@H](C)[C@H](O)[C@H](O)[C@@H]1O	297.121	-0.287	-7.2	21	2	3	4	7
ZINC000004892667	CC(=O)Nc1ccc(O[C@@H]2O[C@@H](CO)[C@@H](O)[C@@H](O)[C@@H]2NC(C)=O)cc1	354.143	-1.033	-7.7	25	2	5	5	7
CHEMBL4089918	OC[C@H]1O[C@@H](Oc2cccc(COS(=O)(=O)O)c2)[C@H](O)[C@@H](O)[C@@H]1O	366.062	-1.815	-7.1	24	2	6	5	9
CHEMBL604023	CCNC(=O)[C@H]1OC([C@H](O)[C@@H]1O)n2cnc3c(N)nc(nc23)C#Cc4ccc(N)cc4	423.166	-0.854	-5	31	4	3	5	10
CHEMBL1094975	NC1=Nc2c(C(=O)N1)[n+](Cc3ccccc3)cn2[C@@H]4O[C@H](COP(=O)(O)[O-])[C@@H](O)[C@H]4O	453.105	-2.261	-7.1	31	4	6	5	10
ZINC000101268500	N=C(N)NS(=O)(=O)c1ccc(NC=C2C(=O)OC3(CCCCC3)OC2=O)cc1	408.11	0.915	-7.1	28	3	4	4	8
CHEMBL523456	C[C@H](O)[C@@H](O)[C@@H](O)C[C@@H](O)c1coc(Cc2ocnc2)n1	298.116	-0.221	-6.5	21	2	7	4	8
ZINC000001636583	O=c1[nH]c2c(c(=O)[nH]1)S/C(=C1\Sc3[nH]c(=O)[nH]c(=O)c3S1)S2	371.912	0.662	-6.1	22	4	0	4	8
CHEMBL1818659	CC(=O)N[C@@H]1[C@@H](O)[C@H](O)[C@@H](CO)O[C@H]1OCc2ccc(O)cc2	327.132	-1.147	-7.2	23	2	5	5	7
CHEMBL1977526	OC(C=O)C(O)C(O)C(O)C(=O)Nc1ccccc1C#N	294.085	-1.861	-6.5	21	1	6	5	7
ZINC000031665106	Cc1cc(C)nc(NNS(=O)(=O)c2cc(C(=O)O)c(O)cc2C)n1	352.084	1.111	-7.4	24	2	5	4	7
ZINC000005439936	COc1cccc2c1C(=O)c1c(O)c3c(c(O)c1C2=O)C[C@@H](O)C[C@H]3O[C@H]1C[C@@H](N)[C@@H](O)[C@@H](C)O1	485.169	1.07	-5.1	35	5	3	5	10
CHEMBL3961225	O=C1NC(=O)\C(=C\c2cnn3c(NC4CC4)nc(NC(Cn5ccnc5)c6ccccc6)nc23)\N1	470.193	1.929	-7	35	6	8	4	10
CHEMBL3392932	CCC[C@@H]1C[C@H](N(C)C1)C(=O)N[C@@H]([C@@H](C)O)[C@@H]2O[C@H](SC)[C@H](O)[C@@H](O)[C@H]2O	406.214	-0.857	-5.9	27	2	7	5	8
ZINC000012427775	Cn1c2[nH]c(-c3ccc4c(c3)OCCO4)c(-c3c(N)n(C)c(=O)[nH]c3=O)c2c(=O)[nH]c1=O	438.129	-0.371	-7.1	32	5	2	4	9
CHEMBL3950884	CNc1nc(NC2CC2)n3ncc(\C=C\4/NC(=O)NC4=O)c3n1	314.124	-0.079	-7.3	23	4	4	4	8
CHEMBL2377810	Nc1ccc(cc1)C(=O)c2sc(Nc3ccc(cc3)S(=O)(=O)N)nc2N	389.062	1.929	-5.7	26	3	5	4	8
CHEMBL328835	OP(=O)(O)OCC1OCC(S)(O1)N2C=C(F)C(=O)NC2=O	343.988	-1.302	-6.4	21	2	4	4	8
ZINC000071750040	CN(C)C(=O)c1ccc2c(c1)N(C)[C@H](CC(=O)NC(CO)(CO)CO)CO2	381.19	-1.192	-5.4	27	2	7	4	7
ZINC000223476269	Nc1cc(O)nc(CCNC(=O)c2cc(=O)n(-c3ccccc3)[nH]2)n1	340.128	0.216	_7.5	25	3	5	4	7
ZINC000257270647	CC(C)(C)OC(=O)N[C@@H]1CC[C@@H](n2cc(F)c(O)nc2=O)[C@@H](O)[C@@H]1O	359.149	0.038	-6.3	25	2	2	4	8
ZINC000000849571	CC(C)Nc1nc(NC(C)C)nc(NS(=O)(=O)c2ccc(N)cc2)n1	365.163	1.895	-7.2	25	2	7	4	8
ZINC000027414326	OCCNc1ncnc2c1ncn2[C@H]1O[C@@H](CO)[C@H](O)[C@@H]1O	311.123	-2.158	-6.2	22	3	5	5	10
CHEMBL604354	O[C@@H]1[C@H](O)[C@H](OC1N2C=C(F)C(=O)NC2=O)C(=O)O	276.039	-2.62	-6.8	19	2	2	4	7
CHEMBL434340	CO[C@@H]1[C@H](O)[C@@H](CO)O[C@H]1n2ccc3c(O)nc(N)nc23	296.112	-1.015	-6.7	21	3	3	4	9
CHEMBL3759817	O=C(N\N=C\1/C(=O)Nc2ccccc12)c3cncc(c3)C(=O)N\N=C\4/C(=O)Nc5ccccc45	453.119	1.254	-7.6	34	5	4	4	7
ZINC000253397078	CC(=O)c1c2c(c(O)c(C)c1O)[C@]1(C)C(=CC(=O)/C(=C(/C)NCC(=O)NCC(C)C)C1=O)O2	456.19	1.93	-5.9	33	3	6	4	8
CHEMBL90801	Nc1nc(O)c2ncn(C[C@H](CCl)OCP(=O)(O)O)c2n1	337.034	-0.127	-6.4	21	2	6	4	8
ZINC000000092054	OC[C@@H]1O[C@@H](Nc2ccc(OC(F)(F)F)cc2)[C@H](O)[C@H](O)[C@@H]1O	339.093	-0.203	-6.6	23	2	4	5	7
CHEMBL603605	CCCNc1nc2c(N)ncnc2n1C3O[C@H](CO)[C@@H](O)[C@H]3O	324.155	-1.158	-7.4	23	3	5	5	10
CHEMBL308759	Nc1nc(O)c2ncn([C@@H]3O[C@H](CO)[C@@H](O)[C@H]3F)c2n1	285.087	-1.297	-7	20	3	2	4	9
CHEMBL3914990	COc1cc(ccc1Nc2ncc3ccnc(NC(CO)CO)c3n2)c4cnn(C)c4	421.186	1.943	-7.3	31	4	8	4	10
ZINC000043509391	Cc1cc(=O)oc2cc(O[C@]3(C)O[C@@H](CO)[C@](C)(O)[C@@](C)(O)[C@]3(C)O)ccc12	394.163	0.841	-7	28	3	3	4	8
CHEMBL1770824	CNc1nc(cs1)[C@H]2C[C@H]3C[C@H]3N2C(=O)[C@H](O)[C@@H](O)C(=O)N[C@H](C)c4ccc(cc4)n5cccn5	496.189	1.632	-6.7	35	5	8	4	9
CHEMBL165225	Nc1ncnc2c1ncn2[C@@H]3C[C@H](COP(=O)(O)O)[C@@H](C3)OP(=O)(O)O	409.055	-0.053	-6.4	26	3	6	5	9
CHEMBL3138932	Cn1cc(N)cc1C(=O)Nc2cc(C(=O)Nc3cc(C(=O)NCC\C(=N\C#N)\N)n(C)c3)n(C)c2	478.219	0.747	-3.8	35	3	8	5	9
CHEMBL2064313	COC(=O)c1ccc2c(ccn2c3ccc(O[C@H]4O[C@H](CO)[C@@H](O)[C@H](O)[C@@H]4O)c(Cl)c3)c1	463.103	1.249	-5.6	32	4	5	4	9
CHEMBL4103314	Cn1cncc1C(=O)NC[C@H]2OC[C@@](O)(CNC(=O)c3ccccc3)[C@@H]2O	374.159	-0.929	-7.2	27	3	6	4	7
CHEMBL293258	CC1=CN(C2CC(O)C(OP(=O)(O)O)O2)C(=O)NC1=O	308.041	-1.44	-6.6	20	2	3	4	7
CHEMBL375035	OC[C@H]1O[C@H]([C@H](O)[C@@H]1O)N2C=C(\C=C\Br)C(=O)NC2=O	347.996	-1.486	-6.8	20	2	3	4	7
CHEMBL1393230	Cc1ccc(cc1NC(=O)CNCc2ccccn2)S(=O)(=O)N3CCOCC3.OC(=O)C(=O)O	494.147	0.295	-3.3	34	3	7	4	8
ZINC000253409793	CC(=O)c1c2c(c(O)c(C)c1O)[C@]1(C)C(=CC(=O)/C(=C(/C)NC[C@H](C)O)C1=O)O2	401.147	1.539	-5.7	29	3	4	4	8
ZINC000077469731	O[C@]1(CNCc2cccc(-c3nnn[nH]3)c2)CNCCOC1	304.165	-0.693	-7.1	22	3	5	4	7
ZINC000012507322	NC1=Nc2nc3cc4c(cc3n2[C@@H](c2ccc(O)c(O)c2)N1)OCCCO4	367.128	1.705	-7.2	27	5	1	4	9
CHEMBL1976256	OC(=O)CC[C@H](NC(=O)c1ccc(cc1)N2N=C3C=CC(=O)C=C3NC2=O)C(=O)O	412.102	0.073	-7.4	30	3	7	4	7
CHEMBL1198709	O[C@@H]1C[C@@H](COP(=O)(O)OP(=O)(O)O)O[C@H]1N2C=CC(=O)NC2=O	388.007	-1.589	-6.5	24	2	6	5	9
CHEMBL369683	CSC1OC(CO)C(O)C(C1O)n2cc(nn2)C(=O)NCc3ccccc3	394.131	-0.449	-6.7	27	3	6	4	9
CHEMBL3144031	NC(=S)c1[nH]nc([C@@H]2O[C@H](CO)[C@@H](O)[C@H]2O)c1OCc3ccccc3	365.105	-0.223	-7.3	25	3	6	5	7
ZINC000001676501	Nc1nc2nn(-c3ccc(C(=O)N[C@@H](CCC(=O)O)C(=O)O)cc3)nc2c(=O)[nH]1	401.108	-0.866	-6.7	29	3	7	5	9
ZINC000033979243	Cc1cn([C@@H]2C[C@H](O)[C@H](CO[P@@](=O)(O)OP(=O)(O)O)O2)c(=O)[nH]c1=O	402.023	-1.28	-6.5	25	2	6	5	9
CHEMBL1973264	NNc1nc2nonc2nc1NN	182.066	-1.416	-5.4	13	2	2	4	9
CHEMBL335011	CC1=NN=C(c2ccc(N)cc2)c3cc4OCOc4cc3C1.OC(=O)[C@H]5NC[C@@H]6ON=C([C@H]56)C(=O)O	493.16	1.265	-5.7	36	6	3	4	10
ZINC000223574038	C=C[C@H]1[C@H](O[C@@H]2O[C@H](CO)[C@@H](O)[C@@H](O)[C@H]2O)OC=C2C(=O)OCC[C@H]21	358.126	-1.592	-6.5	25	3	4	4	9
ZINC000005289962	OC[C@@H]1O[C@H](NC(=S)OC2CCCCC2)[C@H](O)[C@H](O)[C@@H]1O	321.125	-0.99	-6.7	21	2	3	5	7
CHEMBL1724826	COc1cccc(C2C(C)C(NNC(=O)N)Oc3cc4OCOc4cc23)c1O	387.143	1.789	-8	28	4	4	4	7
CHEMBL611235	OC[C@H]1OC([C@H](O)[C@@H]1O)N2C(=O)NC(=O)C=C2C#C	268.07	-2.871	-6.9	19	2	2	4	7
CHEMBL229397	N[C@@H](C=O)[C@@H](O)[C@H](O)[C@H](O)COS(=O)(=O)O	259.036	-3.585	-5.8	16	0	7	5	8
CHEMBL2093982	C[C@@H](Nc1ncnc2c1ncn2[C@@H]3O[C@H](CO)[C@@H](O)[C@H]3O)[C@H](O)c4ccccc4	401.17	-0.028	-7.3	29	4	6	5	10
ZINC000005386059	CCOC(=O)C1=C(N)Oc2[nH]c(=S)[nH]c(=O)c2[C@H]1c1ccccc1O	361.073	1.396	-7	25	3	3	4	7
CHEMBL172018	CC(=O)C1=C(NNC(=O)c2ccccn2)[C@@]3(C)C(=CC1=O)Oc4c(C(=O)C)c(O)c(C)c(O)c34	463.138	1.898	-5.4	34	4	5	4	9
CHEMBL3229995	CC(=O)Nc1cc(NC(=O)C)cc(N\C(=C\2/C(=O)OC(=O)C(=C2O)C(=O)C)\O)c1	403.102	1.269	-8.1	29	2	5	5	9
ZINC000101239053	C=CCn1c(=O)[nH]c(O)c(C2=NN[C@@H](c3ccc(O)cc3)C2)c1=O	328.117	0.572	-6.8	24	3	4	4	7
ZINC000005537182	N#Cc1cc2c(n([C@@H]3O[C@@H](CO)[C@@H](O)[C@@H](O)[C@@H]3O)c1=S)CCCCC2	366.125	0.331	-6.5	25	3	2	4	8
CHEMBL2018088	OC[C@H]1O[C@H]([C@H](O)[C@@H](O)[C@@H]1O)c2cccc(Cc3oc4ccccc4n3)c2	371.137	0.933	-7.4	27	4	4	4	7
CHEMBL4099505	C[C@@H](O)[C@H](N[C@H]1CCc2cc(ccc12)C#Cc3ccc(Cn4ccnc4CCO)cc3)C(=O)NO	474.227	1.698	-3.2	35	4	8	5	7
CHEMBL536301	Br.C1CN=C(N\N=C\c2ccc(\C=N\NC3=NCCN3)cc2)N1	378.092	0.03	-6	23	3	4	4	8
CHEMBL1742458	CN1C(=NS(=O)(=O)N=C1NCCSCc2csc(N=C(N)N)n2)N	391.067	-1.268	-6.5	24	2	6	4	9
CHEMBL374308	CC(C)[C@H](O)[C@]1(NC(=O)[C@H](C)[C@@H]1O)C(=O)SC[C@H](NC(=O)C)C(=O)O	376.13	-1.282	-7.5	25	1	7	5	7
CHEMBL1521771	Nc1nc(Nc2ccccc2F)nc(NCCO)c1[N+](=O)[O-]	308.103	1.254	-6.2	22	2	6	4	8
ZINC000255988888	CO[C@@H]1O[C@H](CO)[C@H](O)[C@H](O)[C@H]1NC(=O)OCc1ccccc1	327.132	-0.633	-6.5	23	2	5	4	7
CHEMBL358067	Nc1ncnc2c1nnn2C(CO)CC(CO)CO	268.128	-1.672	-5.5	19	2	6	4	9
ZINC000016957976	Cc1ccc(NC(=O)/C(=N/Nc2ccc([N+](=O)[O-])cc2[N+](=O)[O-])C2C(=O)NC(=O)NC2=O)cc1	469.098	1.2	-7.1	34	3	7	4	10
CHEMBL4105173	CC(=O)O[C@@H]1[C@H](O)C[C@](O)(C[C@H]1OC(=O)\C=C\c2ccc(O)c(O)c2)C(=O)O	396.106	-0.075	-6.8	28	2	5	5	9
ZINC000020117140	O=C1N=C(O)C2(C(=O)N1)[C@H](c1cccc([N+](=O)[O-])c1)NC(=S)N[C@H]2c1cccc([N+](=O)[O-])c1	470.064	1.956	-5.3	33	4	4	4	7
ZINC000020849205	Cc1ncc(CO)c2cc(C(=O)Nc3ccc(S(N)(=O)=O)cc3)c(=N)oc12	388.084	1.008	-5.2	27	3	4	4	7
ZINC000100923594	O=C1O[C@H]([C@@H](O)CO)C(=N\Nc2ccccc2)/C1=N/Nc1ccccc1	354.133	1.201	-7.2	26	3	6	4	8
ZINC000012534117	Nc1ccccc1C1=NC(=O)[C@@]2(CC(c3ccc([N+](=O)[O-])cc3)=NN2)NN1	365.124	0.652	-7.8	27	4	3	4	8
ZINC000002383083	Sc1nnc(NCNc2nnc(S)s2)s1	277.954	1.448	-5.2	15	2	4	4	10
CHEMBL4105573	COc1ccc(C(=O)NC[C@@H]2N[C@H](CO)[C@H](O)[C@@H]2O)c(OC)c1	326.148	-1.512	-6.6	23	2	6	5	7
ZINC000019899110	Cc1c2c(c(O)c3c(O)ccc(Cl)c13)C(=O)[C@@]1(O)C(=O)C(C(N)=O)=C(O)[C@@H](N(C)C)[C@@H]1C2	460.104	1.109	-3.7	32	4	2	5	8
ZINC000257214675	CC1(C)S[C@@H]2[C@H](O)[C@@H](O)[C@H](O)[C@H](O)C(=O)N2[C@@H]1C(=O)NCCc1ccccc1	410.151	-1.149	-6.6	28	3	4	5	7
CHEMBL2070508	Nc1ncnc2c1ncn2[C@@H]3O[C@@H]([C@@H](O)[C@H]3O)C(=O)NC4CCCC4	348.155	-0.914	-6.4	25	4	3	4	9
CHEMBL3559153	CN1c2ccc(NC3=NCCN3)cc2C(=O)c4cc(NC5=NCCN5)ccc14	375.181	1.434	-6.4	28	5	2	4	8
ZINC000253529560	CC/C=C\C[C@@H]1[C@@H](CC(=O)O)CC[C@H]1O[C@H]1O[C@@H](CO)[C@H](O)[C@@H](O)[C@@H]1O	374.194	0.029	-6.8	26	2	8	5	7
CHEMBL1192115	NCC(=O)N1CCC[C@H]1C(=O)N[C@@H](CO)C(=O)NNc2cccc3C(=O)c4ccccc4C(=O)c23	479.18	-0.668	-6.6	35	4	7	5	8
CHEMBL1195775	Cn1cc(NC(=O)c2oc(cc2)[N+](=O)[O-])cc1C(=O)NCCC(=N)N	348.118	0.834	-6.3	25	2	7	4	7
ZINC000002571344	COC(=O)[C@H](CO)NC(=O)[C@@H](NC(=O)OCc1ccccc1)[C@@H](C)O	354.143	-0.688	-6.4	25	1	8	4	7
ZINC000239432859	CCCC12CN3CC(C)(CN(C1)C3[C@H](O)[C@H](O)[C@@H](O)CO)C2=O	328.2	-1.606	-6.8	23	4	6	4	7
CHEMBL1689636	OC[C@H]1O[C@@H]([C@@H](O)[C@@H](O)[C@@H]1O)S(=O)(=O)CCc2ccccc2	332.093	-1.556	-6.9	22	2	5	4	7
CHEMBL3774812	CO[N+]1=C(Nc2ccc(NC(=O)c3ccc(NC4=[N+](CCN4)OC)cc3)cc2)NCC1	425.216	0.829	-3.5	31	4	6	5	7
ZINC000004824166	CS(=O)(=O)NC[C@@H]1O[C@@H](n2cnc3c2ncnc3N)[C@@H](O)[C@@H]1O	344.09	-2.423	-6.9	23	3	4	4	10
CHEMBL3350014	Nc1nc(O)c2ncn([C@H]3C[C@@H](CO)[C@@H]3CO)c2n1	265.117	-0.724	-6.2	19	3	3	4	8
CHEMBL1966860	Oc1nc2cc3nc(O)c(O)nc3cc2nc1O	246.039	0.395	-6.7	18	3	0	4	8
CHEMBL2001976	OP(=O)(O)C(\N=C\1/SC=C(N1CC=C)c2ccc(cc2)[N+](=O)[O-])P(=O)(O)O	435.006	1.851	-5.7	27	2	7	4	7
ZINC000020673427	COc1cc(NC(=O)C[C@@H]2SC(NC(=N)N)=NC2=O)cc(OC)c1OC	381.111	0.522	-6.4	26	2	6	4	7
CHEMBL463626	OC[C@H]1O[C@H]([C@H](O)[C@@H]1O)N2C(=O)NC(=O)C(=C2C=O)F	290.055	-2.9	-7	20	2	3	4	8
CHEMBL544806	Cl.CCCSCC1NC(C(O)C1O)c2c[nH]c3c(N)ncnc23	359.118	0.84	-6.7	23	3	5	5	7
ZINC000006757439	CC1(C)Cc2c(sc(NC(=O)C(=O)NCCOCCO)c2C(N)=O)CO1	385.131	-0.238	-5.8	26	2	7	4	7
CHEMBL379965	CCc1ccc(cc1)c2cn(nn2)[C@H]3C=C(O[C@@H]([C@H](O)[C@H](O)CO)[C@@H]3NC(=O)C)C(=O)O	446.18	-0.365	-5.6	32	3	8	5	9
CHEMBL1599287	NNC(=O)c1ccc(CSc2nnc(O)nc2O)cc1	293.058	0.179	-7	20	2	4	4	8
ZINC000003860652	O=[N+]([O-])c1ccccc1O[C@@H]1O[C@H](CO)[C@H](O)[C@H](O)[C@H]1O	301.08	-1.227	-6.9	21	2	4	4	8
ZINC001506396254	CCN1[C@@H](c2ccc(Cl)cc2)[C@@H](CNC(=O)Cn2[nH]nnc2=N)C[C@@]1(C)CO	407.184	0.689	-6.8	28	3	7	4	7
ZINC000105377641	O=C(/C=C/c1ccccc1)OC[C@@H](O)[C@@H](O)[C@@H](O)[C@@H](O)CO	312.121	-1.321	-6.5	22	1	8	5	7
CHEMBL1766281	Nc1nc(N)c2ncn(C[C@H](CF)OCP(=O)(O)O)c2n1	320.08	-0.519	-6.2	21	2	6	4	8
CHEMBL3261148	OC[C@@H](O)CONC(=O)c1ncncc1Nc2ccc(I)cc2F	448.004	0.978	-6.4	24	2	7	4	7
ZINC000019312827	CC12CN3CC(C)(CN(C1)C3[C@@H](O)[C@H](O)[C@@H](O)[C@@H](O)CO)C2=O	330.179	-3.025	-6.6	23	4	5	5	8
ZINC000013136395	Oc1ncnc(O)c1C(c1ccc(F)cc1)c1c(O)ncnc1O	330.076	1.408	-7.6	24	3	3	4	8
ZINC000013450993	CCOC(=O)[C@@H]1[C@@H](c2cc([N+](=O)[O-])ccc2O)NC(=O)N[C@@]1(O)C(F)(F)F	393.078	1.084	-7.6	27	2	4	4	7
ZINC000240517109	CNc1cc([C@H]2C[C@@H](Nc3cc(OC)nc(N)n3)C2)nc(N)n1	316.176	0.839	-7	23	3	5	4	9
CHEMBL3229986	CC(=O)C1=C(O)\C(=C(/O)\Nc2ccc(NS(=O)(=O)C)cc2)\C(=O)OC1=O	382.047	0.724	-5.8	26	2	5	4	9
CHEMBL416228	COC(=O)[C@@H]1CSCc2c(O)cc(O)c(C)c2C(=O)OC[C@H](NC(=O)OC(C)(C)C)C(=O)N1	484.152	1.361	-5.8	33	2	2	4	10
CHEMBL305665	CSC1OC(C(NC(=O)[C@@H]2CCC[C@H](C)N2)C(C)Cl)C(O)C(O)C1O	396.149	-0.2	-6.7	25	2	5	5	7
ZINC000390822370	CC(=O)N[C@@H]1[C@@H](O)[C@H](O)[C@@H](CO)O[C@H]1Cc1ccc2c(C)cc(=O)oc2c1	377.147	-0.37	-6.6	27	3	4	4	7
CHEMBL1172167	OC[C@H]1O[C@H](Oc2ccc3NC(=O)Oc3c2)[C@@H](O)[C@@H](O)[C@@H]1O	313.08	-1.7	-7.4	22	3	3	5	8
CHEMBL1555466	C[N+](C)(C)c1nc(N)nc2c1ncn2[C@H]3O[C@@H](CO)[C@@H](O)[C@H]3O	325.162	-1.783	-6.7	23	3	3	4	9
CHEMBL1192481	NC(c1cc(cc2nc(O)c(O)nc12)[N+](=O)[O-])P(=O)(O)O	316.021	0.084	-7.5	21	2	3	5	8
ZINC000005052353	CO[C@H](O[C@@H](CO)[C@@H](O)S(=O)(=O)O)[C@@H](O)S(=O)(=O)O	325.998	-3.251	-5.6	19	0	8	5	9
ZINC000005234417	COc1ccc(O[C@@H]2O[C@H](CO)[C@@H](O)[C@H](O)[C@H]2NC(C)=O)cc1	327.132	-0.982	-7.1	23	2	5	4	7
CHEMBL608638	O[C@H]1[C@H](O)C(O[C@@H]1COP(=O)(O)CC(=O)O)N2C=C(I)C(=O)NC2=O	491.943	-1.953	-6.4	25	2	6	5	9
CHEMBL4069291	CSc1ccc(C(=O)O)c2nc3cccc(O[C@@H]4O[C@@H](C)[C@H](O)[C@@H](O)[C@H]4O)c3nc12	432.099	1.409	-7.6	30	4	4	4	9
CHEMBL2064650	CNC(=O)[C@@]12C[C@@H]1[C@H]([C@H](O)[C@@H]2O)n3cnc4c(NC)nc(nc34)C#Cc5ccc(cc5)c6ccccc6	494.207	1.964	-5.8	37	6	4	4	8
ZINC000001504913	O=[N+]([O-])c1cccc(N[C@@H]2OC[C@H](O)[C@@H](O)[C@@H]2O)c1	270.085	-0.554	-6.8	19	2	3	4	7
CHEMBL3125425	COc1cc(O)cc2C(=O)C3=C([C@H](O)[C@@H](O)[C@@](C)(O)[C@@H]3O)C(=O)c12	336.085	-1.076	-7.2	24	3	1	5	8
CHEMBL1334069	NC1=NC(=O)N(N=C1)[C@@H]2O[C@H](CO)[C@@H](O)[C@H]2O	244.081	-3.168	-6.1	17	2	2	4	9
CHEMBL2000422	Nc1nc(SCC#C)nc2c1ncn2C3OC(CO)C(O)C3O	337.084	-1.255	-6.9	23	3	4	4	10
CHEMBL1172711	NS(=O)(=O)c1ccc(Nc2nc(nc3[nH]cnc23)N4CCNCC4)cc1	374.127	0.153	-7.2	26	4	4	4	8
CHEMBL3654905	COc1ccc(Cc2cc([C@@H]3O[C@H](CO)[C@@H](O)[C@H](O)[C@H]3O)c4CCOc4c2Cl)s1	442.085	1.451	-7.1	29	4	5	4	8
CHEMBL1617597	N[C@@H](CO)c1oc(nn1)[C@H](CC(=O)O)NC(=O)C2CCNCC2	327.154	-1.307	-6.7	23	2	7	5	8
CHEMBL1183111	C[C@@H](O)[C@@H]1[C@H]2[C@@H](C)C(=C(N2C1=O)C(=O)O)S[C@@H]3CN[C@H](Cc4c[n+](C)c(CO)n4C)C3	451.201	-0.498	-6	31	4	7	4	7
CHEMBL1091141	OC[C@H]1O[C@H]([C@H](O)[C@@H](O)[C@H]1O)n2cc(COCC3CO3)nn2	317.122	-2.834	-6.4	22	3	6	4	10
ZINC000253535399	Cc1nc(C)c(CC(=O)N[C@H]2C[C@@H](c3cc(O)nc(N)n3)C2)c(O)n1	344.16	0.482	-7.5	25	3	4	4	8
ZINC000008828992	S=C1NCCOCCOCCOCCNC(=S)NCCOCCOCCOCCN1	468.208	-0.972	5.2	30	1	0	4	8
CHEMBL3647391	O[C@@H]([C@H]1O[C@@H]2SC(=N[C@@H]2[C@@H](O)[C@@H]1O)NCCF)C(F)(F)F	334.061	-0.613	-6.3	21	2	3	4	7
ZINC000034007573	O=[N+]([O-])c1ccc(O[C@@H]2O[C@H](CO)[C@H](O)[C@H](O)[C@H]2O)c(Cl)c1	335.041	-0.573	-6.8	22	2	4	4	8
CHEMBL595745	CS(=O)(=O)c1ccc2NNC(=C(Nc3cncc(Cl)c3)c2c1)C(=O)N	379.051	1.335	-7.6	25	3	4	4	7
CHEMBL1459241	COc1ccccc1Oc2c[nH]nc2c3ccc(OCC(=O)NN)cc3O	370.128	1.952	-8.1	27	3	7	4	7
CHEMBL3144294	NS(=O)(=O)NC(=O)OC[C@H]1O[C@H](C[C@@H]1O)N2C=CC(=O)NC2=O	350.053	-2.885	-7.5	23	2	4	4	9
ZINC000096576707	CCOC(=O)c1[nH]c(=O)[nH]c1CC1(Cc2[nH]c(=O)[nH]c2C(=O)OCC)C(=O)CC(C)(C)CC1=O	476.191	0.803	-7.6	34	3	8	4	8
ZINC000003637735	N=C(N/N=C/c1ccc(O)cc1)c1nonc1N	246.087	0.306	-6.5	18	2	3	4	7
ZINC000011667001	Cc1oc2cc(O[C@@H]3O[C@H](CO)[C@@H](O)[C@@H](O)[C@@H]3O)ccc2c(=O)c1-c1ccccn1	415.127	0.342	-5.9	30	4	4	4	9
CHEMBL3819152	COc1c(nccc1C(=O)N)[C@@H]2O[C@H](CO)[C@@H](O)[C@H]2O	284.101	-1.657	-6.6	20	2	4	4	7
CHEMBL62068	NC(=N)Nc1nc(cs1)C(=O)Nc2nc3ccc(cc3s2)C(=O)N	361.042	1.409	-6.7	24	3	4	5	7
CHEMBL4105675	N[C@@H]1[C@@H](O)[C@H](O)[C@@H](CO)O[C@H]1n2cc(nn2)c3ccc4ccccc4c3	356.148	0.037	-7	26	4	3	4	8
ZINC000245326824	CN1CCN2c3ccc(N/C=C4\C(=O)N(C)C(=O)N=C4O)cc3C[C@]3(C(=O)N=C(O)N=C3O)[C@H]2C1	481.171	0.605	-3.3	35	5	2	4	7
ZINC000005956081	Cc1cc(-c2ccc(Cl)cc2)c(C#N)c(=S)n1[C@@H]1O[C@@H](CO)[C@@H](O)[C@@H](O)[C@H]1O	422.07	1.69	-5.9	28	3	3	4	8
ZINC000001705604	Nc1nc(N)[n+]([O-])c(N)c1NCO	186.087	-2.177	-5.3	13	1	2	5	7
CHEMBL3747303	CNC(=O)[C@@]12C[C@@H]1[C@H]([C@H](O)[C@@H]2O)n3cnc4c(NC)nc(N=[N+]=[N-])nc34	359.145	-0.161	-6.9	26	4	4	4	9
CHEMBL2160192	CC(C)c1[nH]nc(O[C@@H]2O[C@H](CO)[C@@H](O)[C@H](O)[C@H]2O)c1Cc3ccccc3F	396.17	0.442	-7.2	28	3	6	5	7
CHEMBL1735751	COc1ccc(NS(=O)(=O)c2cc(NN=C3C(=O)NC(=O)NC3=O)ccc2Cl)cc1	451.035	1.283	-8.5	30	3	6	4	8
ZINC000005462303	CSc1ncnc2c1ccn2[C@H]1O[C@@H](COP(=O)(O)O)[C@@H](O)[C@H]1O	377.045	-0.118	-6.6	24	3	5	4	9
CHEMBL4097510	OC[C@H]1O[C@H](OCc2onc(c2)c3ccccc3)[C@H](O)[C@@H](O)[C@@H]1O	337.116	-0.342	-6.7	24	3	5	4	8
ZINC000001898106	NS(=O)(=O)c1nnc(/N=C(\O)c2c(O)[nH]c3ccccc3c2=O)s1	367.005	0.369	-6.7	24	3	3	4	8
CHEMBL532905	COc1ccc(Cc2cnc3nc(N)nc(N)c3c2C)cc1OC.OCCS(=O)(=O)O	451.153	0.972	-3.7	31	3	6	4	10
CHEMBL484774	Nc1ncnc2c1nc(CNCP(=O)(O)O)n2CCc3ccccc3	362.126	0.876	-7.2	25	3	7	4	7
ZINC000026249456	CO/N=C(\C(=O)N[C@@H]1C(=O)N2C(C(=O)O)=C(CO)CS[C@H]12)c1csc(N)n1	413.046	-1.193	-5.6	27	3	6	4	10
ZINC000003100656	O=C(O)c1nsnc1[C@H](O)[C@H](O)C(=O)O	233.995	-1.285	-5.6	15	1	4	4	7
CHEMBL423478	COC(=O)[C@H](CO)NC(=O)[C@@H]1Cc2c([nH]c3ccccc23)[C@H](N1)c4cc(OC)c(O)c(OC)c4	469.185	1.145	-6.2	34	4	7	5	8
ZINC000012321390	COC(=O)/C=C(/Nc1ccc(S(N)(=O)=O)cc1)C(=O)NCCO	343.084	-1.089	-5.9	23	1	7	4	7
CHEMBL48108	C[C@@H](O)[C@@H]1C2[C@@H](C)C(=C(N2C1=O)C(=O)O)S[C@@H]3COC[C@@H]3CNC(=O)[C@@H](C)N	413.162	-0.648	-6.7	28	3	7	4	7
CHEMBL2442607	N\C(=N/O)\c1ccc(cc1)c2cncc(n2)c3ccc(cn3)\C(=N\O)\N	349.129	1.395	-5	26	3	4	4	7
ZINC000002688876	O=C(C[C@H]1SC(=O)NC1=O)Nc1ccc(NC(=O)C[C@H]2SC(=O)NC2=O)cc1	422.035	1.047	-5.8	28	3	6	4	8
ZINC000252553116	CNc1cc(C(=O)N[C@H]2C[C@@H](c3cc(NCCO)ncn3)C2)ccn1	342.18	0.993	-6.7	25	3	7	4	7
ZINC000252616723	OC[C@H](O)[C@H](O)[C@H](O)[C@H](O)C=Nc1ccc(/C=C\c2ccnc3ccccc23)cc1	408.169	1.543	-6.4	30	3	8	5	7
CHEMBL2208095	COc1c(C)cc(cc1C)C2=C(O)C=CN([C@@H]3O[C@H](CO)[C@@H](O)[C@H]3O)C2=O	377.147	0.458	-6.8	27	3	4	4	8
ZINC000013718467	COc1cc([C@@H]2C(C(=O)Nc3ccccc3)=C(C)N=C3C(C(N)=O)=CNN32)ccc1O	419.159	1.956	-7	31	4	5	4	7
CHEMBL1725014	O=C(CSC(=S)N1CCCC1)NNC=C2C(=O)NC(=S)NC2=O	373.034	-0.864	-6.4	23	2	4	4	7
CHEMBL1170805	CC(=O)c1cc(C(=O)NOC[C@@H](O)CO)c(Nc2ccc(I)cc2F)n1C	491.035	1.73	-6.5	27	2	8	4	7
CHEMBL3126832	CC(C)[C@H]1NC(=O)[C@H]2CSSCC\C=C\[C@H](CC(=O)N[C@H](C)C(=O)N2)OC(=O)C[C@@H]1O	473.165	0.525	-5.2	31	2	1	4	8
ZINC000057406610	CN[C@H]1[C@@H](O)[C@H]2O[C@@H]3O[C@H](C)CC(=O)[C@]3(O)O[C@H]2[C@@H](NC)[C@H]1O	332.158	-2.926	-5.8	23	3	2	5	9
ZINC000079271283	O=c1cc(I)n([C@H]2O[C@@H](CO)[C@H](O)[C@@H]2O)c(=O)[nH]1	369.966	-2.247	-6.3	18	2	2	4	7
CHEMBL390487	COc1cc(CCOc2cc(O)c3C(=O)C=C(Oc3c2)C(=O)O)ccc1NC(=O)C(=O)O	443.085	1.85	-7.5	32	3	7	4	8
CHEMBL2058449	CCc1nc(C)cc2cc(oc12)c3c(Cl)nc(N)nc3N[C@@H]4C[C@H](CO)[C@@H](O)[C@H]4O	433.152	1.906	-7.1	30	4	5	5	9
ZINC000252625980	NC(=O)c1cc(NN=C2C(N)=NN(c3ccccc3)C2=O)cc(C(N)=O)c1	365.124	-0.029	-7.6	27	3	5	4	7
CHEMBL118154	Nc1nc(N)c2CC(CNc3ccc(cc3)C(=O)O)C(=O)Nc2n1	328.128	0.562	-7.4	24	3	4	5	7
CHEMBL464500	NC(=O)C[C@H](NC[C@H]1[C@@H]2[C@@H](O)CC(=C)[C@@H]3C[C@H](O)C(=C)[C@@H]3[C@H]2OC1=O)C(=O)O	394.174	-1.064	-7.1	28	3	6	5	7
ZINC000005537127	N#Cc1cc2c(n([C@H]3O[C@@H](CO)[C@@H](O)[C@@H](O)[C@@H]3O)c1=S)CCCCCC2	380.141	0.721	-7.7	26	3	2	4	8
ZINC001704327870	C[C@@]1(O)CCOC2(CCN(c3nc(=N)c(C#N)c[nH]3)CC2)[C@H]1O	319.164	-0.368	-6.6	23	3	1	4	7
CHEMBL2408897	Cc1nc[nH]c1C[C@H](NC(=O)[C@H]2O[C@@H]2C(=O)O)C(=O)Nc3nc(cs3)c4ccc(F)cc4	459.101	1.499	-7.3	32	4	8	4	7
ZINC000004306122	CCOc1ccc(Nc2nc(NCCO)nc(N)c2[N+](=O)[O-])cc1	334.139	1.514	-7.5	24	2	8	4	9
CHEMBL9122	OCC1OC(CC(O)C1O)N2C=CC(=O)NC2=O	258.085	-2.462	-6.8	18	2	2	4	7
CHEMBL277076	CCNC(=O)C1OC(C(O)C1O)n2cnc3c(N)ncnc23	308.123	-1.836	-6.8	22	3	3	4	9
CHEMBL4113306	N[C@@H]1CCCC[C@H]1Nc2nc(NC3CC3)n4ncc(\C=C\5/NC(=O)NC5=O)c4n2	397.197	0.561	-7.6	29	5	5	5	9
CHEMBL1519357	CCOc1ccc(NC2OC(CO)C(O)C(O)C2O)c(c1)[N+](=O)[O-]	344.122	-0.795	-6.7	24	2	6	5	9
CHEMBL1332056	OCC(CO)(CO)NCC(O)CN1c2ccccc2Sc3ccccc13	376.146	0.956	-6.6	26	3	8	5	7
CHEMBL207924	CNC(=O)[C@H]1O[C@H]([C@H](O)[C@@H]1N)n2cnc3c(NCc4cc(Cl)cc(Cl)c4)ncnc23	451.093	1.077	-7.3	30	4	5	4	9
CHEMBL3144022	NC(=O)c1csc(n1)[C@@H]2O[C@H](COP(=O)(O)O)[C@@H](O)[C@H]2O	340.013	-1.487	-6.4	21	2	5	5	8
CHEMBL159333	OC(=O)C(=O)O.C(CN1CCCCC1)NC2=NCC(=NN2)c3ccccc3	375.191	0.581	-3.3	27	3	4	4	7
CHEMBL371438	CC(C)(C)c1ccc(\C=N\O[C@@H]2OC(CO)C(O)[C@H](O)C2O)cc1	339.168	0.134	-5.3	24	2	4	4	7
CHEMBL2062345	CN1CCCN=C1\C=C/c2cccs2.OC(C(O)C(=O)O)C(=O)O	356.104	0.373	-5.4	24	2	5	4	7
CHEMBL174430	[Na+].Nc1nc(cc(c2cccc(NC(=O)C(O)CCC(=O)[O-])c2)c1C#N)c3cc(Cl)ccc3O	488.086	-0.938	-1.2	34	3	7	4	8
ZINC000004015561	COC(=O)[C@H](NC(=O)[C@@H](Cc1ccc(O)cc1)NC(=O)OC(C)(C)C)[C@@H](C)O	396.19	0.867	-6.6	28	1	7	4	7
CHEMBL48346	CO\N=C(\C(=O)NC1CN(NCC(=O)O)C1=O)/c2csc(N)n2	342.075	-2.008	-5.8	23	2	7	4	9
CHEMBL589079	Cc1onc(C)c1c2nnc(Cc3cc(ccc3Cl)[C@@H]4O[C@H](CO)[C@@H](O)[C@H](O)[C@H]4O)s2	467.092	1.569	-6.3	31	4	5	4	10
CHEMBL3601077	OC[C@H]1C[C@@H](Nc2nc(NC3CC3)ncc2c4nc5cnccc5s4)[C@H](O)[C@@H]1O	414.147	1.237	-7.8	29	5	6	5	10
CHEMBL1852196	Cc1cc(on1)c2nc(c[nH]2)[C@@H](O)[C@H](O)[C@H](O)CO	269.101	-0.879	-6.2	19	2	5	5	7
CHEMBL14312	C[C@@H](O)[C@@H]1[C@H]2[C@@H](C)C(=C(N2C1=O)C(=O)O)S[C@@H]3CN[C@@H](CSc4ccc(CN)cc4)C3	463.16	1.855	-7.1	31	4	8	4	7
ZINC000253535926	Nc1nc(O)cc([C@H]2C[C@@H](NC(=O)c3nc(O)c4ccccc4n3)C2)n1	352.128	1.089	-6.9	26	4	3	4	8
CHEMBL48502	CO[C@]12C3NC3CN1C4=C(C2COC(=O)N)C(=O)C(=C(C)C4=O)OCC(O)CO	409.149	-2.24	-5.7	29	4	7	4	10
CHEMBL3397976	COc1cc(\C=N\NC(=O)CCC2=Nc3ccccc3C(=O)N2)cc(O)c1O	382.128	1.426	-6.9	28	3	6	4	7
ZINC000575424731	O=S1(=O)CC[C@@H](NC(=S)Nc2nc3[nH]cnc3c(O)n2)C1	328.041	-0.468	-6.9	21	3	2	4	7
ZINC000585284785	Cc1ccn(CCNC(=O)[C@H]2O[C@@H](CN)[C@H](O)[C@@H](O)[C@H]2O)n1	314.159	-2.883	-6.4	22	2	5	5	8
ZINC000019593735	CC(=O)Nc1ccc(S(=O)(=O)N[C@H](CO)[C@@H](O)c2ccc([N+](=O)[O-])cc2)cc1	409.094	0.926	-6.8	28	2	8	4	7
CHEMBL3229960	CC(=O)C1=C(O)\C(=C(/O)\Nc2ccc(N)c(O)c2)\C(=O)OC1=O	320.064	0.64	-6.7	23	2	3	5	9
ZINC000095352687	CNC(=O)c1ccc(CNc2nc(N)nc(C)c2CCC(=O)O)o1	333.144	0.949	-7.2	24	2	7	4	7
ZINC000007597001	Cc1cc(O)c(C(c2ccc(O)c(O)c2)c2c(O)cc(C)n(C)c2=O)c(=O)n1C	398.148	1.703	-6.6	29	3	3	4	8
CHEMBL2336378	CC[C@H](N)COc1nc(NC(=N)N)c2ncn(C(C)C)c2n1	306.192	0.829	-7.1	22	2	6	4	7
ZINC000003840237	CSc1ccc(O[C@@H]2C=C(C(=O)N[C@@H](Cc3ccc(O)cc3)C(N)=O)C[C@@H](O)[C@H]2O)cc1C	472.167	1.435	-7	33	3	8	5	7
CHEMBL1085528	CC(C)Cc1ccc(Cc2cc(ccc2Cl)[C@@H]3O[C@H](CO)[C@@H](O)[C@H](O)[C@H]3O)nn1	422.161	1.434	-7.7	29	3	6	4	7
CHEMBL528475	CCCCCc1cnc2nc(N)nc(N)c2c1.OCCS(=O)(=O)O	357.147	0.788	-3.7	24	2	6	4	8
CHEMBL111186	CC(C)(C)c1cn2c(O)c3NCN(COC(CO)CO)c3nc2n1	337.175	0.249	-6.3	24	3	5	4	9
ZINC000035323717	COC(=O)[C@@H]1[C@H](c2ccccc2)[C@H](C(=O)OC)[C@@](C)(O)C[C@]12NNC(=S)N2	393.136	0.182	-6.3	27	3	3	4	7
CHEMBL607892	COC(=O)\C(=C/C1=CC(=O)NC(=O)N1C2O[C@H](CO)[C@@H](O)[C@H]2O)\Br	406.001	-1.943	-7.2	24	2	4	4	9
CHEMBL587948	CC1(C)NC(=NC(=N)N1OCc2nc(N)nc(Nc3ccccc3)n2)N	356.182	0.52	-7.7	26	3	5	5	9
ZINC000000237789	CC(C)OC[C@@H](O)Cn1c(NN)nc2c1c(=O)[nH]c(=O)n2C	312.155	-1.505	-6.3	22	2	6	4	9
ZINC000013540298	Cc1c(CCO[P@@](=O)(O)OP(=O)(O)O)sc(=O)n1Cc1cnc(C)nc1N	440.032	0.716	-7.2	27	2	8	4	10
CHEMBL512334	Nc1nc(N)nc(NCCCC(N)(C(F)F)C(=O)O)n1	291.126	-0.725	-6.4	20	1	7	5	8
CHEMBL1369703	Cc1ccccc1Nc2nc(N)nc(CSc3n[nH]c(N)n3)n2	329.117	1.498	-7.2	23	3	5	4	9
CHEMBL374061	CCN(CC)c1nc(nc(n1)N2C[C@H](N)C[C@H](N)C2)N3C[C@H](N)C[C@H](N)C3	378.297	-1.553	-6.6	27	3	5	4	10
ZINC000524733630	Cc1c(C)[n+]([O-])c([C@H](c2ccc(O)c(Cl)c2)C2C(=O)NC(=O)NC2=O)n1CCO	422.099	0.204	-7.5	29	3	5	4	7
CHEMBL161604	NC1=NC(=C(N=O)C(=O)N1)NCCCOc2ccc(cc2)C(=O)O	333.107	1.329	-6.6	24	2	8	4	8
CHEMBL1201314	CC(C)[C@H](N)C(=O)OCC(CO)OCn1cnc2C(=O)NC(=Nc12)N	354.165	-1.437	-6.6	25	2	8	4	10
CHEMBL3633193	NC(=O)CNc1ncnc(Nc2ccc(cc2)C(=N)N)c1[N+](=O)[O-]	330.119	0.31	-7.5	24	2	7	5	8
CHEMBL2002837	COC(=O)C(C(=O)C(=O)Nc1nnc(S)[nH]1)c2csc(N)n2	342.02	-0.404	-6.4	22	2	5	4	10
ZINC000104226541	NC(=O)C(/N=N/c1ccccc1S(=O)(=O)O)=N/Nc1ccccc1S(=O)(=O)O	427.026	1.175	-6.8	28	2	5	4	8
CHEMBL360191	OCC1OC(CC1O)n2cnc3[C@H](O)CN=CNc23	268.117	-0.989	-6.8	19	3	2	4	8
ZINC000253413105	CC(=O)NCCN/C(C)=C1\C(=O)C=C2Oc3c(c(O)c(C)c(O)c3C(C)=O)[C@@]2(C)C1=O	428.158	1.294	-7.3	31	3	5	4	8
ZINC000025666835	Nc1nc(N[C@H](O)C(Cl)(Cl)Cl)nc(N[C@@H](O)C(Cl)(Cl)Cl)n1	417.884	1.655	-6.2	21	1	4	5	8
CHEMBL3935953	Cl.C[C@H](N)C(=O)Nc1ccc2CCc3c(nn(c4ccc(cc4)S(=O)(=O)N)c3c2c1)C(=O)N	490.119	1.092	-6.5	33	4	5	4	7
CHEMBL507850	C[C@H](O)[C@H](O)C(=O)COC(=O)c1c(C)cc(O)cc1O	284.09	-0.126	-6	20	1	5	4	7
CHEMBL3142989	O[C@H]1C[C@@H](O[C@@H]1COP(=O)(O)CC(=O)O)N2C=C(\C=C\Br)C(=O)NC2=O	453.978	-0.163	-6.8	26	2	7	4	8
ZINC000005372829	O=C1O[C@H]([C@@H](O)CO)/C(=N\O)[C@@H]1O	191.043	-2.544	-5	13	1	2	4	7
CHEMBL94860	NC(Cc1c(O)noc1c2nn[nH]n2)C(=O)O	240.061	-1.485	-6	17	2	4	4	8
CHEMBL3278356	Nc1nc(O)c2N=C(CNc3ccc(C(=O)O)c(Cl)c3)CNc2n1	348.074	1.726	-6.4	24	3	4	5	8
CHEMBL274884	Cc1ccc(cc1)S(=O)(=O)O.N\C(=N/O)\N\N=C\c2cccc(c2)[N+](=O)[O-]	395.09	1.464	-5.5	27	2	4	4	7
ZINC000257298496	NCCCCC(=O)N[C@@H]1CC[C@@H](n2ccc(O)nc2=O)[C@@H](O)[C@@H]1O	340.175	-1.381	-7.2	24	2	6	5	8
ZINC000016292194	Cc1ccc(C2=NN[C@H]([C@](C)(O)[C@@](C)(O)[C@@](C)(O)CO)S2)cc1	340.146	0.564	-6.6	23	2	5	5	7
CHEMBL311217	COC(=O)c1c(N)ncnc1N[C@@H]2O[C@H](C)[C@@H](O)[C@H]2O	284.112	-1.276	-6.2	20	2	3	4	9
ZINC001529139766	Nc1nc(NCCN2CCCC[C@@H]2CO)c2ncnc-2[nH]1	291.181	0.145	-6.6	21	3	5	4	7
CHEMBL37147	CNC(=O)[C@H](Cc1ccc(O)cc1)NC(=O)Nc2nnc(S)s2	353.062	1.011	-6.2	23	2	5	5	7
CHEMBL1161155	CCS(=O)(=O)O.Cc1nc(N)nc(N)c1NC(=O)C23CC4CC(CC(C4)C2)C3	411.194	1.998	-3.4	28	5	3	4	7
CHEMBL3329574	Cc1ccc(cc1)S(=O)(=O)Nc2cccc(\C=C\C(=O)C[C@@H]3OC[C@@H](O)[C@H](O)[C@H]3O)c2	447.135	1.25	-8.4	31	3	7	4	7
ZINC000012705758	C[C@@H](C(=O)NCc1ccccc1)N(C(=O)c1snc(C(N)=O)c1N)c1cccc(O)c1	439.131	1.881	-7.6	31	3	7	4	7
CHEMBL4116992	CSc1ncnc2c1c3sccc3n2[C@@H]4O[C@H](COP(=O)(O)O)[C@@H](O)[C@H]4O	433.017	1.096	-6.6	27	4	5	4	10
ZINC000005317272	NC(=S)N/N=C(/c1nc2ccc([N+](=O)[O-])cc2nc1O)[C@@H](O)c1ccccc1	398.08	1.514	-7.7	28	3	5	4	8
ZINC000072422602	COCCNc1nc2c(c(N[C@H](CO)c3cccnc3)n1)CCNCC2	358.212	0.764	-6.9	26	3	8	4	8
ZINC000104123790	N=C(N)NS(=O)(=O)c1ccc(/N=N\c2ncccc2O)cc1	320.069	1.374	-7.3	22	2	4	4	7
CHEMBL3600658	O=C1NC(=S)NC(=O)C1=CNc2ccc(cc2)S(=O)(=O)Nc3nccs3	408.997	0.771	-6.5	26	3	5	4	8
ZINC000006623779	COC(=O)/C=C/c1ccc(O[C@@H]2O[C@H](CO)[C@@H](O)[C@H](O)[C@H]2NC(C)=O)c(OC)c1	411.153	-0.796	-6.4	29	2	7	4	9
CHEMBL281484	COC(=O)c1c(O)cccc1CC2CC3[C@H](N(C)C)C(=O)C(=C(O)[C@]3(O)C(=O)C2)C(=O)N	446.169	-0.142	-3.7	32	3	5	4	9
ZINC000104102303	OC[C@@H](O)[C@@H](O)C(/C=N/Nc1ccccc1)=N/Nc1ccccc1	328.154	1.266	-7.1	24	2	8	5	7
ZINC000085594154	CCS(=O)(=O)c1ccc(O)c(NC=C2C(=O)NC(=S)NC2=O)c1	355.03	0.012	-6.7	23	2	4	4	7
CHEMBL589342	CN(C)c1cccc2c(cccc12)S(=O)(=O)NC[C@H]3N[C@H](CO)[C@@H](O)[C@@H]3O	395.151	-0.761	-6.7	27	3	6	5	7
ZINC000003864916	O=[N+]([O-])c1ccc(N/N=C/[C@H](O)[C@@H](O)[C@H](O)CO)cc1	285.096	-0.933	-5.8	20	1	7	5	8
CHEMBL3645369	COc1ccc(cc1)c2nc3cc(\C=C\C(=O)NO)ccc3n2CC(O)CO	383.148	1.584	-7.8	28	3	7	4	7
ZINC000242750534	CC(=O)N[C@H]1[C@@H](O)[C@@H](O)[C@@H](CO)O[C@H]1Oc1ccc2oc(=O)sc2c1	371.067	-0.823	-7.2	25	3	4	4	9
ZINC000257289768	CNCC(=O)NC[C@@]1(O)CCCN(c2cc(NC)ncn2)C1	308.196	-0.815	-6.8	22	2	6	4	7
ZINC000013660217	CC/C=C\[C@H](O)[C@H](O)C1=C(C)C(=O)[C@]2(O1)C(=O)N[C@@](OC)(C(=O)c1ccccc1)[C@@H]2O	431.158	0.003	-6.5	31	3	7	4	8
ZINC000585092532	O=[N+]([O-])c1cnc(N[C@@H]2C=C[C@H](CO)C2)nc1N[C@@H]1C=C[C@H](CO)C1	347.159	1.083	-7.3	25	3	7	4	8
CHEMBL1446887	NC(=O)NC(=O)CC1SC(=NC1=O)NNC2=NC(=O)CS2	330.02	-1.707	-6.7	21	2	2	4	8
ZINC000225363385	COc1c(O)c(CN2CCC[C@H](C)C2)c2c(c1O)[C@H]1O[C@H](CO)[C@@H](O)[C@H](O)[C@@H]1OC2=O	439.184	0.031	-5.5	31	4	4	5	10
ZINC000077262878	OC[C@@H](O)CNC[C@H]1O[C@H](Cc2cc(-c3ccccc3)on2)CC[C@@H]1O	362.184	0.735	-6.8	26	3	8	4	7
ZINC000244633152	Nc1nc(NCCNc2cccnc2)cc([C@H]2C[C@H](N)C2)n1	299.186	1.182	-6.5	22	3	6	4	7
ZINC000035999699	CC(=O)C1=C(O)[C@@H](N)[C@H]2Cc3c(C)c4ccc(C)c(O)c4c(O)c3C(=O)[C@@]2(O)C1=O	411.132	1.265	-5.8	30	4	1	5	8
ZINC000008742081	O=C(O)c1[nH]nc(-c2n[nH]c(C(=O)O)c2[N+](=O)[O-])c1[N+](=O)[O-]	312.009	0.013	-6.7	22	2	5	4	8
CHEMBL1183718	CN(C1CN=C(NC(=O)N)NC1=O)C(=O)C[C@@H](N)c2csc(CCN)n2	382.154	-1.985	-7.5	26	2	6	5	8
CHEMBL3278568	CCCN(N=O)C(=O)N[C@@H]1[C@@H](O)[C@H](O)[C@@H](CO)O[C@@H]1OC	307.138	-1.457	-5.8	21	1	6	4	8
CHEMBL518553	C[C@@H]1O[C@@H](Oc2cc(O)c3C(=O)c4c(O)cc(C)cc4C(=O)c3c2)[C@H](O)[C@H](OC(=O)C)[C@H]1O	458.121	0.959	-5.4	33	4	3	4	10
ZINC000031460590	O=C(O)[C@H]1O[C@@H](O[C@@H]2N=C(c3ccccc3)c3cc(Cl)ccc3NC2=O)[C@H](O)[C@@H](O)[C@@H]1O	462.083	0.364	-7	32	4	4	5	8
ZINC000008825937	CNC(=O)NC(=O)[C@@H](C)Sc1ncccc1C(=O)O[C@@H](C)C(=O)NC(=O)NC	411.121	0.019	-7.1	28	1	6	4	8
CHEMBL47997	CC(C)[C@@H](N)C(=O)NC[C@H]1OCC[C@H]1SC2=C(N3C([C@H]2C)[C@@H]([C@@H](C)O)C3=O)C(=O)O	441.193	0.13	-6.7	30	3	8	4	7
CHEMBL605095	CC(C)(C)S(=O)(=O)c1ccc2NNC(=C(Nc3cncc(F)c3)c2c1)C(=O)N	405.127	1.989	-7.3	28	3	4	4	7
CHEMBL494404	Cl.Nc1cc(ccc1OCCCOc2ccc(cc2N)C3=NCCN3)C4=NCCN4	430.188	1.82	-6.6	30	4	8	4	8
CHEMBL2443318	NS(=O)(=O)c1ccc(CCNc2nc(F)nc(NCC(=O)O)n2)cc1	370.086	-0.191	-6.8	25	2	8	4	8
ZINC000005956241	CC(=O)c1c(C)n([C@@H]2O[C@@H](CO)[C@@H](O)[C@@H](O)[C@@H]2O)c(=S)c(C#N)c1-c1ccco1	420.099	0.833	-5	29	3	4	4	10
ZINC000005496338	O=S(=O)(O)C1C[C@@H](S(=O)(=O)O)N[C@@H](S(=O)(=O)O)C1	324.96	-1.946	-5.5	18	1	3	4	7
ZINC000514288205	C[C@@H]1C[C@H](OC(=O)C[C@](C)(O)CC(=O)O)CC(C)(C)[C@]1(O)/C=C/[C@@H](O)C(=O)O	402.189	0.703	-6.5	28	1	8	5	7
CHEMBL1974284	NC(=O)N\N=C(/CC1=CC(=O)Oc2cc(O)ccc12)\C(=O)Nc3ccccc3C(=O)N	423.118	0.803	-8.7	31	3	6	5	7
ZINC000524729862	COc1cc([C@@H](CC(=O)N[C@@H](C)C(N)=O)c2oc(C)cc(=O)c2O)ccc1O	390.143	0.88	-7.5	28	2	7	4	7
ZINC000253535788	Cc1cc(O)nc(NCCNc2cc([C@H]3C[C@@H](N)C3)nc(N(C)C)n2)n1	358.223	1.075	-7	26	3	7	4	9
CHEMBL3621240	Nc1nc(N2CCOCC2)c3ncn(CC(=O)NCCCC(=O)NO)c3n1	378.176	-1.353	-6.6	27	3	7	4	10
ZINC000019339010	C[C@](O)([C@@](C)(O)CO)[C@@](C)(O)C1N2CC3(C)CN1CC(c1ccccc1)(C2)C3=O	404.231	-0.284	-7.2	29	5	5	4	7
CHEMBL1199843	OC(C1Oc2ccc(\C=C\OS(=O)(=O)O)cc2O1)c3ccc(O)c(O)c3	382.036	1.719	-6.6	26	3	5	4	8
ZINC000018541233	CNC(=O)c1ccc(NC(=O)CSc2nc(N)cc(N)n2)cc1	332.106	0.731	-7	23	2	5	4	7
ZINC000244724072	COc1cncc([C@@H](NC(=O)c2cnc(O)cc2O)[C@H]2C[C@@H](O)C2)c1	345.132	1.138	-6.4	25	3	5	4	7
CHEMBL527813	Nc1nc(N)c2cc(Cc3ccc(cc3)[N+](=O)[O-])cnc2n1.OS(=O)(=O)O	394.07	1.035	-3	27	3	3	4	9
ZINC000104292354	NNC(=S)N/N=C(/c1nc2ccc(Cl)cc2nc1O)[C@@H](O)c1cccc([N+](=O)[O-])c1	447.052	1.672	-7.8	30	3	5	5	9
ZINC000020559514	Cc1ccc(NC(=O)C[C@@H]2SC(N[C@H](c3ccc(F)cc3)c3c(O)[nH]c(=O)[nH]c3=O)=NC2=O)cc1	497.117	1.922	-5.8	35	4	6	5	7
CHEMBL3193070	CC(C)C[C@H](NC(=O)OC(C)(C)C)C(=O)N\N=C\c1c(C)nc(O)nc1O	381.201	1.586	-5.8	27	1	6	4	8
ZINC000299763696	Cc1cnc(CNc2cc([C@H]3CCOC3)nc(NCCO)n2)c(C)c1O	359.196	1.714	-7.2	26	3	7	4	8
ZINC000408547094	O=C(O)c1ccc(N/C=C2/C(=O)NC(=O)N(Cc3ccco3)C2=O)cc1O	371.075	1.258	-7.8	27	3	5	4	7
ZINC000005424974	CSc1ncnc2c1n[nH]c2[C@H]1O[C@@H](CO)[C@@H](O)[C@@H]1O	298.074	-0.771	-6.1	20	3	3	4	8
ZINC000004878477	O=c1nc2n(C[C@@H](O)[C@H](O)[C@H](O)CO)c3ccccc3cc-2c(=O)[nH]1	347.112	-1.735	-7.5	25	3	5	5	8
CHEMBL596924	COC(=O)[C@@]1(O)C[C@@H](O)[C@H](O)[C@@H](C1)OC(=O)\C=C\c2ccc(O)c(O)c2	368.111	-0.558	-6.8	26	2	4	5	9
CHEMBL1501015	OCCNS(=O)(=O)c1ccc2c3ccc(cc3C(=C(C#N)C#N)c2c1)S(=O)(=O)NCCO	474.067	0.057	-6.4	32	3	8	4	8
ZINC000584899014	CCS(=O)(=O)NC[C@H](C)NCCc1nc(N)cc(O)n1	303.137	-0.776	-6.5	20	1	8	4	7
ZINC000008431404	CCOC(=O)NC(=O)C(=CNc1ccc(NC(C)=O)cc1)C(=O)NC(=O)OCC	406.149	1.486	-7.5	29	1	7	4	8
CHEMBL167191	CNc1ncnc2c1ncn2C3COC(COP(=O)(O)O)C(C3)OP(=O)(O)O	439.066	-0.215	-6	28	3	7	5	10
CHEMBL2392196	CC(=O)c1c(O)c(C)c(O)c2c1OC3=CC(=O)\C(=C(\C)/NCCS(=O)(=O)O)\C(=O)[C@]23C	451.094	1.046	-5.2	31	3	5	4	9
ZINC000036367412	CC(C)(C)OC(=O)NCC(=O)OC[C@@H]1O[C@H](O)[C@@H](O)[C@@H](O)[C@@H]1O	337.137	-2.146		23	1	4	5	9
CHEMBL2205293	CC1=CC(=O)[C@@H]2C[C@@]1(O[C@@H]3O[C@H](CO)[C@@H](O)[C@H](O)[C@H]3O)[C@@]2(C)CO	344.147	-1.911	-6.8	24	4	4	5	8
CHEMBL2005618	CC(=O)NNc1nc(C)c(s1)C(=O)NNC(=O)C(=O)Nc2ccccc2C#N	401.091	0.186	-6.7	28	2	4	5	8
CHEMBL3192400	CCN(CC)S(=O)(=O)c1cccc(c1)C(=O)N\N=C\c2ccc(O)c(O)c2O	407.115	1.598	-6.3	28	2	7	4	7
ZINC000005511442	Nn1cnnc1N/N=C/c1ccc(O)c(O)c1	234.087	-0.151	-6.2	17	2	3	4	8
CHEMBL4094673	Cc1csc2N=C(NC(=O)c12)C(=O)NCc3cccc(CNC(=O)c4nc[nH]n4)c3	423.111	1.271	-7.7	30	4	6	4	7
ZINC000585286711	NC[C@@H]1O[C@H](C(=O)NCCc2ccccn2)[C@H](O)[C@H](O)[C@H]1O	311.148	-2.451	-6.7	22	2	5	5	7
ZINC000238924092	O=C(Cc1cscn1)c1ccc(O[C@@H]2O[C@H](CO)[C@H](O)[C@@H](O)[C@@H]2O)cc1O	397.083	-0.547	-7.1	27	3	6	5	10
CHEMBL2110730	CSCC[C@H](N)C(=O)N[C@]1(CS(=O)(=O)[C@H]2[C@@H]([C@@H]12)C(=O)O)C(=O)O	366.056	-1.866	-5.8	23	2	7	4	7
ZINC000575421149	O=C(NC[C@@H]1CCS(=O)(=O)C1)Nc1cnc(O)nc1O	302.068	-0.556	-6.9	20	2	3	4	7
CHEMBL3237581	CC(C)c1nc(Nc2cc(NCCN)nnc2C(=O)N)ccc1F	333.171	1.347	-7.6	24	2	7	4	7
ZINC000084044118	Cc1occc1C(=O)Nc1nc(CC(=O)Nc2cc(C(N)=O)n[nH]2)cs1	374.08	1.3	-7.2	26	3	6	4	7
ZINC000253535363	Nc1nc(O)cc(CC(=O)N[C@H](c2ccccn2)[C@H]2C[C@H](O)C2)n1	329.149	0.33	-6.8	24	3	5	4	7
CHEMBL3560992	COc1cc(NC(=O)Nc2nnc(s2)[C@H]3C[C@H](O)[C@@H](CO)O3)cc(OC)c1OC	426.121	1.391	-5.2	29	3	7	4	10
CHEMBL352849	OC[C@H]1O[C@H](Oc2ccc(cc2)C(=O)c3ccc(cc3)[N+](=O)[O-])[C@@H](O)[C@@H](O)[C@@H]1O	405.106	0.004	-6.2	29	3	6	4	9
ZINC000585137958	CCCc1cnc(NC(=O)NCc2cc(O)nc(O)n2)s1	309.09	1.619	-7	21	2	5	4	7
CHEMBL558444	OC[C@H]1O[C@H]([C@H](O)[C@@H](O)[C@@H]1O)c2onc(n2)c3cccc4ccccc34	358.116	0.405	-6.8	26	4	3	4	8
CHEMBL1376723	N\C(=C(/C#N)\c1cc(O)c(O)c(O)c1)\C=C(C#N)C#N	268.06	0.97	-7	20	1	2	4	7
CHEMBL424000	[Na+].Nc1nc(cc(c2cccc(NC(=O)C(O)CCC(=O)[O-])c2)c1C#N)c3ccc(O)cc3	454.125	-1.591	-6.5	33	3	7	4	8
CHEMBL1254855	Nc1nc(N)c2nc(CNc3ccc(cc3)S(=O)(=O)O)cnc2n1	347.08	0.443	-6.6	24	3	4	4	9
CHEMBL1710258	Nc1cc(O)nc(SCC(=O)NNC(=O)c2ccccc2)n1	319.074	0.318	-7.2	22	2	4	4	7
CHEMBL1205251	C[C@@H](O)[C@@H]1[C@H]2SC(=C(N2C1=O)C(=O)O)COC(=O)c3ccc(O)c(O)c3	381.052	0.463	-6.3	26	3	5	4	8
CHEMBL162782	COc1c(C)c2COC(=O)c2c(O)c1CCOP(=O)(O)CP(=O)(O)O	396.038	1.259	-5.9	25	2	7	4	7
ZINC000020636271	COC(=O)c1cc(NC(=O)C[C@H]2SC(NC(=N)N)=NC2=O)cc(C(=O)OC)c1	407.09	0.069	-6.9	28	2	5	4	8
CHEMBL534524	O=C(Nc1ccc(NC2=NCCN2)cc1)c3ccc(NC4=NCCN4)cc3	363.181	1.681	-5.6	27	4	4	5	7
ZINC000016994693	CN1CCN2c3ccc(N/C=C4/C(=O)NC(=S)N(C)C4=O)cc3CC3(C(=O)NC(=O)NC3=O)[C@@H]2C1	497.148	-1.116	-4.1	35	5	2	4	9
CHEMBL122330	Oc1ccc(\C=N\NC(=O)CNS(=O)(=O)c2ccc(cc2)[N+](=O)[O-])c(O)c1	394.058	0.435	-7.1	27	2	7	4	8
CHEMBL327402	CO[C@H]1[C@H](O)c2c(O)c3C(=O)c4c(O)cccc4C(=O)c3cc2C(=O)[C@@]1(C)O	384.085	0.869	-5.6	28	4	1	4	8
CHEMBL219806	N[C@@H]1C[C@H](N)CN(C1)c2nc(Nc3ccc(Cl)c(Cl)c3)nc(n2)N4C[C@H](N)C[C@H](N)C4	466.188	0.651	-7.6	31	4	4	5	10
CHEMBL461523	Cc1c(CNc2ccc(cc2)C(=O)N[C@@H](CC(=O)O)C(=O)O)ccc3ncnc(N)c13	423.154	1.79	-6.5	31	3	8	5	7
CHEMBL3962915	N[C@H]1CCCC[C@H]1Nc2nnc(C(=O)N)c(Nc3cccc4[nH]ncc34)n2	367.187	1.272	-8.1	27	4	5	5	8
CHEMBL2164655	CCOC(=O)c1cc(\C=N/NC(=S)N)c(O)c(\C=N/NC(=S)N)c1	368.073	-0.097	-7.5	24	1	6	5	7
CHEMBL2337523	NS(=O)(=O)OC[C@H]1O[C@@H](O)[C@H](O)[C@@H](O)[C@H]1O	259.036	-3.994	-5.9	16	1	3	5	8
CHEMBL4087784	N[C@@H]1[C@@H](O)[C@H](O)[C@@H](CO)O[C@H]1c2nc(n[nH]2)c3ccccc3	306.133	-1.047	-6.6	22	3	3	5	7
ZINC000001591018	OC[C@H](O)Cn1cnc2c1ncnc2NO	225.086	-1.019	-6.3	16	2	4	4	8
ZINC000089643079	CC(C)(C)NC(=O)CNc1cc(NCC(=O)NC(C)(C)C)nc(CS(C)(=O)=O)n1	428.221	0.674	-5.9	29	1	8	4	8
ZINC000864096986	C[C@@H](NC(=O)C(F)(F)C(=O)N[C@H](C)c1nccc(N)n1)c1nccc(N)n1	380.152	0.121	-7	27	2	6	4	8
CHEMBL353216	CCCC(=O)O[C@@H]1C2CCC3[C@@](C)(O)C4CC(O)C(C)(C)C4(O)C(O)C[C@@]13C[C@@]2(C)O	440.277	1.519	-4.2	31	4	3	5	7
ZINC000004577143	COC(=O)[C@H]1C/C(=N/NC(N)=S)[C@@H](C(=O)OC)C/C1=N\NC(N)=S	374.083	-1.263	-6	24	1	4	4	8
ZINC000018067210	O=[N+]([O-])C1[C@@H](O)[C@@H](O)C([N+](=O)[O-])[C@H](O)[C@H]1O	238.044	-3.266	-5.9	16	1	2	4	8
ZINC001772591888	C[C@@H]1CC(=O)C2=C3C(=O)c4cccc(O)c4[C@H](O)[C@]3(O)[C@H](O)[C@@H]3OC(=O)[C@H]4CCCN4[C@]23C1	455.158	0.152		33	6	0	4	9
CHEMBL1254679	OC1CCN(CC2=CC(=C(O)C(=O)C(=C2)CN3CCC(O)CC3)CN4CCC(O)CC4)CC1	461.289	0.623	-6.2	33	4	6	4	8
ZINC000023144669	Cc1ccc(S(=O)(=O)Nc2cc([N+](=O)[O-])ccc2NCCO)cc1C(=O)O	395.079	1.806	-6.9	27	2	8	4	7
CHEMBL1669321	CCC(=O)N[C@@H]1[C@@H](O)[C@H](O)[C@@H](CO)O[C@H]1SC(=S)N(C)C	338.097	-1.1	-5.7	21	1	4	4	7
ZINC000005812663	OC[C@H](O)[C@H](O)[C@H](O)c1nnn[nH]1	190.07	-3.053		13	1	4	5	7
CHEMBL3403405	[O-][N+](=O)c1ccc2NC(=O)C3(C4=C(NC(=O)NC4=O)Nc5[nH]nc(c6ccccc6)c35)c2c1	443.098	1.705	-6.2	33	6	2	5	7
ZINC000003838482	COC(=O)[C@H](NC(=O)C1=C[C@@H](NS(=O)(=O)c2cccc(C(F)(F)F)c2)[C@@H](O)[C@H](O)C1)C(C)C	494.133	0.718	-7.5	33	2	7	4	7
CHEMBL2071116	Cc1nc(NCC2CC2)nc(N[C@@H]3C[C@H](CO)[C@@H](O)[C@H]3O)c1c4nc5cnccc5s4	442.179	1.793	-7.1	31	5	7	5	10
CHEMBL3248258	CC(=O)C1=C(O)\C(=C(/C)\Nc2cccc(c2)C(=O)NC3C(=O)NC(=O)NC3=O)\C(=O)OC1=O	456.092	-0.679	-5.4	33	3	5	5	10
ZINC000100101821	Cc1ccc(N2C(=O)NC(=O)/C(=C/NC(CO)(CO)CO)C2=O)cc1C	363.143	-0.925	-7.5	26	2	6	5	7
CHEMBL1938530	Nc1nc(Cl)c(\N=N\c2ccccc2F)c(N[C@@H]3C[C@H](CO)[C@@H](O)[C@H]3O)n1	396.111	1.781	-7.4	27	3	5	5	9
CHEMBL3980689	CSc1ccc(Cc2c(O[C@@H]3O[C@H](CO)[C@@H](O)[C@H](O)[C@H]3O)n[nH]c2C(F)(F)F)cc1	450.107	0.92	-7.7	30	3	6	5	8
ZINC000004594034	COc1ccccc1N1C(=O)[C@@H]2[C@H](C1=O)[C@H](c1ccc(O)cc1O)N[C@@]2(C)C(=O)O	412.127	1.4	-5.3	30	4	4	4	7
CHEMBL3780197	C\C(=N/NC(=N)N\N=C(/C)\c1ccc(cc1)N2CCNCC2)\c3ccc(cc3)N4CCNCC4	461.302	1.768	2.4	34	4	6	5	7
CHEMBL4083203	CC(=O)NCCNc1nonc1\C(=N\O)\Nc2ccc(F)c(Br)c2	400.029	1.767	-6.9	24	2	6	4	7
CHEMBL610231	O[C@@H]1[C@H](O)C(O[C@H]1COP(=O)(O)O)n2cnc3c(O)nc(nc23)C(F)(F)F	416.034	-0.721	-7.5	27	3	4	5	10
ZINC000503919367	CC(C)(Oc1ccc([C@H]2CC2(Cl)Cl)cc1)C(=O)O[C@H]1O[C@@H](C(=O)O)[C@H](O)[C@@H](O)[C@@H]1O	464.064	0.941		30	3	6	4	8
CHEMBL3692475	CNC(=O)c1c(nc2c3cc(C#CC(C)(O)CO)c(F)cc3OCCn12)C(=O)N	402.134	-0.365	-5.6	29	3	3	4	7
ZINC000072438835	Nc1ccc(NC(=O)C[C@@H](NCc2cccnc2)C(=O)O)cc1[N+](=O)[O-]	359.123	1.144	-6.5	26	2	8	4	7
CHEMBL4063704	COc1cc(OC)c(cc1OC)C(=O)NC[C@@H]2N[C@H](CO)[C@H](O)[C@@H]2O	356.158	-1.503	-6.5	25	2	7	5	8
ZINC000031291573	Cc1cc(CC(=O)O[C@@H]2O[C@H](C(=O)O)[C@@H](O)[C@H](O)[C@H]2O)n(C)c1C(=O)c1ccc(Cl)cc1	467.098	0.196	-6.5	32	3	6	4	9
ZINC000005203149	CC(=O)OC[C@@H](O)[C@@H](O)[C@H](O)[C@H](O)C=O	222.074	-2.808	-5.5	15	0	6	4	7
ZINC000004742787	O=C1[C@@H]2[C@H]3C=C[C@H](O3)[C@H]2C(=O)N1/N=C\[C@H](O)[C@H](O)[C@H](O)[C@H](O)CO	342.106	-3.653	-6.5	24	3	6	5	9
ZINC000828401152	Cc1sc2nc(CCNC(=O)c3n[nH]c(O)n3)nc(O)c2c1C	334.085	0.81	-6.9	23	3	4	4	8
ZINC000257291245	O=C(Nc1nccs1)[C@@H]1CS[C@@H]2[C@H](O)[C@@H](O)[C@H](O)[C@H](O)C(=O)N12	361.04	-2.191	-6.5	23	3	2	5	9
CHEMBL3544822	Nc1nc(N)c2nc(c(N)nc2n1)c3ccc(OS(=O)(=O)O)cc3	349.059	0.015	-6.4	24	3	3	4	10
CHEMBL3979473	NS(=O)(=O)NCCNc1nonc1\C(=N\O)\Nc2ccc(F)c(Cl)c2	393.042	0.315	-7.5	25	2	7	5	8
CHEMBL1081363	O[C@@H]1CC[C@](O)(C[C@H]1O)C2=COc3cc(O)cc(O)c3C2=O	308.09	0.297	-6.3	22	3	1	5	7
ZINC000005201828	COC(=O)[C@@H](O)[C@@H](O)[C@H](O)[C@H](O)C(=O)OC	238.069	-3.224	-5.2	16	0	5	4	8
ZINC000005760845	O=C(O)[C@@H]1O[C@H](N(O)c2ccc(Oc3ccc(Cl)cc3)cc2)[C@H](O)[C@H](O)[C@@H]1O	411.072	1.22	-7.4	28	3	5	5	8
CHEMBL3229964	CC(=O)C1=C(O)\C(=C(/O)\Nc2ccc(O)c(NS(=O)(=O)C)c2)\C(=O)OC1=O	398.042	0.43	-6.6	27	2	5	5	10
CHEMBL3940763	CC1(C)C[C@H](Nc2ncnc(N[C@H]3C[C@H](O)[C@H](COS(=O)(=O)N)C3)n2)c4ccccc14	448.189	1.478	-8.3	31	4	7	4	9
CHEMBL3143941	CCCCc1ccc(NC2=NC(=O)C3N=CN([C@H]4C[C@H](O)[C@@H](COP(=O)(O)O)O4)C3=N2)cc1	479.157	1.033	-7.3	33	4	8	4	9
CHEMBL291653	OCC(CO)OCn1cc(Cl)c2c(NO)ncnc12	288.063	0.213	-5.8	19	2	6	4	8
ZINC000254748769	NS(=O)(=O)c1ccc(NN=Cc2cccc(O)c2O)c([N+](=O)[O-])c1	352.048	1.099	-6.5	24	2	5	4	8
CHEMBL155416	Cc1ccc(cc1)S(=O)(=O)O.N\C(=N/O)\N\N=C\c2ncccc2O	367.095	0.656	-5.5	25	2	3	5	7
ZINC000035644051	NC(=O)N1c2ccccc2C[C@H](O[C@@H]2O[C@H](C(=O)O)[C@@H](O)[C@H](O)[C@@H]2O)c2ccccc21	430.138	0.409	-5.5	31	4	3	5	7
ZINC000257340190	OC[C@@H]1O[C@H](O[C@@H]2C[C@H](c3cccc(F)c3)O[C@@H]3CCC[C@H]32)[C@@H](O)[C@H](O)[C@H]1O	398.174	0.641	-6.8	28	4	4	4	7
CHEMBL1191711	CC1(C)N=C(N)N=C(N)N1c2cccc(c2)N3C(=NC(=NC3(C)C)N)N	356.219	0.058	-6.6	26	3	2	4	10
ZINC000001748574	O=c1[nH]nc(SCc2ccc(CSc3n[nH]c(=O)[nH]c3=O)cc2)c(=O)[nH]1	392.036	-0.186	-7.3	26	3	6	4	8
ZINC000019325251	CC(C)C12CN3CC(C(C)C)(CN(C1)C3OC[C@H](O)[C@@H](O)[C@H](O)CO)C2=O	386.242	-1.14	-6.2	27	4	8	4	8
CHEMBL210663	OCC(CO)OCN1C=C(CO)C(=O)NC1=O	246.085	-2.644	-5.6	17	1	6	4	7
CHEMBL3805838	COC(=O)C[C@H](NC(=O)CNc1nc(NC(=O)C)nc2[nH]cnc12)C(=O)OC	393.14	-1.056	-6.6	28	2	8	4	10
ZINC000000001866	NNc1ccc(N(CCO)CCO)nn1	213.123	-1.447	-5.4	15	1	6	4	7
ZINC000001674444	Nc1nc(N)nc(CCCCCc2nc(N)nc(N)n2)n1	290.172	-0.659	-6.7	21	2	6	4	10
CHEMBL3209186	CC(Nc1nnc(O)nc1O)C(=O)N\N=C\c2cccs2	308.069	0.295	-6.5	21	2	5	4	9
CHEMBL2159108	CCc1ccc(Cc2c(O[C@@H]3O[C@H](CO)[C@@H](O)[C@H](O)[C@H]3O)n[nH]c2C(C)C)cc1	406.21	0.865	-7.4	29	3	7	5	7
CHEMBL1552392	Oc1nnc(C(=O)NNC(=O)CNC(=O)c2oc(Br)cc2)c3ccccc13	433.002	0.882	-7.9	27	3	4	4	7
CHEMBL2237880	COc1cc(ccc1O)C2C(Cl)C(=O)N2NC3C(=O)NC(=O)NC3=O	368.052	-0.869	-7.7	25	3	4	4	7
ZINC000004534290	O=C(N[C@H]1[C@H](OCc2ccccc2)O[C@@H](CO)[C@@H](O)[C@H]1O)OCc1ccccc1	403.163	0.937	-7.7	29	3	7	4	7
CHEMBL3898701	CCCC(=O)O[C@H]1[C@H](O)[C@@H](O)[C@@H](O)[C@H](O)[C@@H]1O	250.105	-2.484	-6.2	17	1	3	5	7
ZINC000002546730	C=CCNC(=S)NNc1nnc(C(C)(C)C)c(=O)n1N	297.137	-0.373	-5.9	20	1	4	4	7
ZINC000253572061	C[C@H]1CCN(S(=O)(=O)c2cc([N+](=O)[O-])ccc2NNC=C2C(=O)NC(=O)NC2=O)[C@@H](C)C1	466.127	0.57	-8.2	32	3	6	4	9
CHEMBL609454	ONC(=N)N\N=C\c1ccc(cc1[N+](=O)[O-])[N+](=O)[O-]	268.056	0.34	-6.9	19	1	4	4	7
ZINC000247736572	OC[C@H](O)[C@H](O)[C@H](O)c1cnn(Cc2ccccc2)n1	279.122	-0.926	-6	20	2	6	4	7
ZINC000022942356	O=C(O)CN1CCCN(CC(=O)O)CCN(CC(=O)O)CCCN(CC(=O)O)CC1	432.222	-1.673	-4.8	30	1	8	4	8
CHEMBL2335933	NC(=N)Nc1nc(N)nc2c1ncn2CCO	236.113	-1.294	-6.5	17	2	3	5	7
CHEMBL3810202	C[C@]1(O)C=CC2=CCO[C@@H](O[C@@H]3O[C@H](CO)[C@@H](O)[C@H](O)[C@H]3O)[C@H]12	330.131	-1.977	-6.7	23	3	3	5	8
ZINC000005047976	CCOC(=O)[C@H](O)[C@H](O)[C@H](O)[C@H](O)[C@@H](C)O	238.105	-2.626	-5	16	0	6	5	7
CHEMBL3681202	COc1cc(ccn1)c2cc(C(=O)N[C@@H]3CC[C@H](CC3)NC(=O)C(C)(C)O)c4c(N)ncnn24	467.228	1.31	-4.3	34	4	6	4	9
ZINC000008781044	CC(=O)Nc1n[nH]c(SCSc2nc(NC(C)=O)n[nH]2)n1	328.052	0.681	-6.7	21	2	6	4	8
CHEMBL445850	C[C@@H](O)[C@@H]1[C@H]2SC(=C(N2C1=O)C(=O)O)CN3C[C@H](O)C[C@H]3C(=O)N	357.099	-1.885	-6.4	24	3	5	4	7
CHEMBL1983379	OCC1OC(C(O)C(O)C1O)N2C(=C(C#N)C(C=C2c3ccccc3)c4cccs4)S	458.097	1.653	-5.4	31	4	4	5	9
ZINC000005616292	Nc1cccc(S(=O)(=O)N[C@@H](CO)[C@H](O)c2ccc([N+](=O)[O-])cc2)c1	367.084	0.55	-6.7	25	2	7	4	7
ZINC000252618412	C[C@@H]1O[C@H](Nc2ccc(S(=O)(=O)O)cc2)[C@H](O)[C@@H](O)[C@@H]1O	319.073	-0.827	-7.5	21	2	3	5	7
CHEMBL3763341	Nc1nc(NCCCCCC(=O)NO)c2nc[nH]c2n1	279.144	0.413	-6.7	20	2	7	5	7
CHEMBL3143943	O[C@H]1C[C@@H](O[C@@H]1COP(=O)(O)O)N2C=NC3C(=O)N=C(Nc4ccccc4)N=C23	423.094	-0.309	-6.5	29	4	5	4	9
CHEMBL1879960	O.CN1CCCN=C1\C=C\c2sccc2C.OC(C(O)C(=O)O)C(=O)O	388.13	-0.144	-1.5	26	2	5	4	7
ZINC000009698202	O=C(O)c1ccccc1NS(=O)(=O)c1cccc(NN=C2C(=O)NC(=S)NC2=O)c1	447.031	0.484	-7.6	30	3	6	5	8
ZINC000064858427	C[C@@H](O)[C@H](O)C1=N[C@@H]2C(=O)N=C(N)NC2=NC1	239.102	-2.606	-6.3	17	2	2	4	7
ZINC000575421362	C[C@@]1(NC(=O)Nc2cnc(O)nc2O)CCS(=O)(=O)C1	302.068	-0.414	-6.4	20	2	2	4	7
ZINC001560405237	C[C](O)[C@H]1C(=O)[N+]2=C(C(=O)O)C(S[C@@H]3CN/C(=C(/O)N(C)C)C3)=C(C)[C@H]12	381.135	0.645	-5.5	26	3	5	4	7
ZINC000012656103	C[C@]12CC[C@H]3[C@@H](CC[C@]4(O)C[C@@H](O)CC[C@]34/C=N/NC(N)=S)[C@@]1(O)CC[C@@H]2C1=CC(=O)OC1	477.23	1.518	-5.2	33	5	3	5	7
ZINC000263583488	C[C@H](O)[C@@H]1NO[C@](O)(Nc2ncc(C(F)(F)F)cc2Cl)[C@@H]1O	343.055	0.457	-6.9	22	2	3	5	7
ZINC000006654686	CCCCN(C(=O)CSC(=N)N)c1c(N)n(CC(C)C)c(=O)[nH]c1=O	370.179	0.535	-6.4	25	1	8	4	7
ZINC000067674086	Cc1nc[nH]c1[C@H]1NC(=O)NC(C)=C1C(=O)NCCSc1nnnn1C	377.138	-0.222	-6.3	26	3	6	4	8
CHEMBL3937671	COC(=O)[C@@H](N)CNC(=O)Nc1cc(Cl)cc(c1O)S(=O)(=O)O	367.024	-0.086	-6.6	23	1	5	5	7
CHEMBL45320	C[C@@H](O)[C@@H]1C2[C@@H](C)C(=C(N2C1=O)C(=O)O)S[C@@H]3CCO[C@@H]3CNC(=O)CN	399.146	-0.894	-6.6	27	3	7	4	7
CHEMBL432687	NC(=N)NC(=O)\C=C\c1ccc(s1)C(=O)NC(CC(=O)O)c2ccc3OCOc3c2	430.095	1.445	-6.1	30	3	7	5	7
CHEMBL4090179	N[C@@H](CCP(=O)(O)C(O)c1ccc(s1)[N+](=O)[O-])C(=O)O	324.018	0.72	-6.2	20	1	7	4	7
CHEMBL346387	Nc1cc(OC[C@H](CO)OCP(=O)(O)O)nc(N)n1	294.073	-1.468	-6.1	19	1	7	5	8
CHEMBL3304415	CC(C)[C@H](N)C(=O)NCC(=O)N[C@H]1C[C@H](N(C1)S(=O)(=O)c2ccc(C)cc2)C(=O)NO	455.184	-1.152	-7	31	2	8	5	7
ZINC000001857821	O=C(C[C@@H]1SC(=O)NC1=O)Nc1cccc(NC(=O)C[C@@H]2SC(=O)NC2=O)c1	422.035	1.047	-7.5	28	3	6	4	8
ZINC000022357944	C[C@@]1(NC(=O)CNc2cc([N+](=O)[O-])ccc2NCCO)CCS(=O)(=O)C1	386.126	0.104	-7.1	26	2	8	4	8
ZINC000263587044	O=C1NC(=O)C2(Oc3nc(O)nc(O)c3[C@@H]2c2ccc([N+](=O)[O-])cc2)C(=O)N1	387.045	-0.575	-6.9	28	4	2	4	10
CHEMBL316893	CC1(C)N=C(N)N=C(N)N1c2ccc(CNC(=O)Nc3ccc(cc3)S(=O)(=O)F)cc2	447.149	1.852	-4.4	31	3	5	4	8
CHEMBL33850	CN\C(=C\[N+](=O)[O-])\Nc1cccc(c1)c2csc(N=C(N)N)n2	333.101	1.422	-7.7	23	2	6	4	7
ZINC000230141294	C=C[C@@H]1CS[C@H]2[C@H](NC(=O)/C(=N/OCC(=O)O)c3c[nH]c(N)n3)C(=O)N2[C@H]1C(=O)O	438.096	-1.547	-5.1	30	3	8	5	9
CHEMBL3800694	O[C@H]1[C@H](O)[C@@H](COP(=O)(O)O)O[C@H](Oc2ccc(cc2Cl)c3ccc(cc3)C#N)[C@H]1O	471.049	1.174	-6.9	31	3	6	5	8
ZINC000241738592	CC(=O)N[C@@H]1[C@H](OCCOc2ccc(Cl)cc2C)O[C@H](CO)[C@@H](O)[C@H]1O	389.124	-0.012	-6.7	26	2	7	4	7
ZINC000022594053	O=S(=O)(O)C[C@H](O)CN1CCN(C[C@H](O)CS(=O)(=O)O)CC1	362.082	-2.899	-5.5	22	1	8	4	8
ZINC000012338586	COC(=O)/C(=C/NC(=S)N/C=C(\NC(=O)c1ccccc1)C(=O)OC)NC(=O)c1ccccc1	482.126	1.339	-6.4	34	2	8	4	7
CHEMBL3197218	Oc1nnc(NCC(=O)N\N=C\C2CCC=CC2)c(O)n1	292.128	0.153	-7	21	2	5	4	8
ZINC000306122925	OC[C@@H]1O[C@H](c2ccc(Cl)c(Cc3ccc(O[C@@H]4CCOC4)cc3)c2)[C@H](O)[C@@H](O)[C@H]1O	450.145	1.613	-6.5	31	4	6	4	7
ZINC000245232420	COC(=O)[C@@H]1[C@H](c2ccc(O)c(OC)c2)c2c(O)n[nH]c2C[C@]1(C)O	348.132	1.058	-6.5	25	3	3	4	7
ZINC000009518205	Nc1nc(SCC(=O)NCc2ccco2)[nH]c(=O)c1NC(=O)c1ccc(F)c(F)c1	435.081	1.884	-7.7	30	3	7	4	7
CHEMBL1741764	Nc1nc(O)c2CN(CNc2n1)c3ccc(cc3)S(=O)(=O)N	322.085	-0.199	-6.1	22	3	2	4	8
CHEMBL2013030	Cl.COC(=O)CNC(=O)CNC(=O)CN1CCCNCCCNCCC1	393.214	-1.521	-6.8	26	1	6	4	7
ZINC001704313083	Cc1cccc(Nc2nc(N)nc(CN3CC[C@H](O)[C@@](CC4CC4)(C(=O)O)C3)n2)c1	412.222	1.944	-7.8	30	4	7	4	8
ZINC000257300635	CN[C@H]1CC[C@@](O)(Cn2cnc3c2ncnc3N)[C@H](O)C1	292.165	-0.728	-6.8	21	3	3	4	8
CHEMBL3140193	OC[C@H]1O[C@@H](S\C(=N/OS(=O)(=O)O)\c2cccc(Cl)c2Cl)[C@H](O)[C@@H](O)[C@@H]1O	462.957	0.008	-7.5	27	2	5	5	10
CHEMBL3601763	OC(=O)c1cc(NC=C2C(=O)NC(=S)NC2=O)ccc1[N+](=O)[O-]	336.016	0.12	-6.7	23	2	4	4	7
ZINC000575420363	O=C(Nc1cnc(O)nc1O)N[C@@H]1C=CS(=O)(=O)C1	286.037	-0.68	-5.9	19	2	2	4	7
CHEMBL1196329	CC(C)C[C@H](NC(=O)C(O)C1OC(=O)CC1N)[C@@H]2Cc3cccc(O)c3C(=O)O2	406.174	0.008	-7.5	29	3	6	4	8
ZINC000005758724	O=C1[C@H]2[C@H](C(=O)N1COP(=O)(O)O)[C@@H]1[C@H]2[C@H]2C=C[C@@H]1[C@H]1C(=O)N(COP(=O)(O)O)C(=O)[C@@H]12	492.033	-1.616	-6.1	32	6	6	4	8
ZINC000006137677	Nc1cc(S(=O)(=O)O)ccc1/N=N/c1ccc(S(=O)(=O)O)cc1N	372.02	1.76	-4.7	24	2	4	4	8
CHEMBL358849	OCCC1O[C@H](C[C@@H]1O)N2C=C(CO)C(=NC2=O)NO	287.112	-1.432	-6.3	20	2	5	5	9
CHEMBL3654341	CC(=O)N1CC(COc2ccc(Cc3cc(ccc3Cl)[C@@H]4O[C@H](CO)[C@@H](O)[C@H](O)[C@H]4O)cc2)C1	491.171	1.303	-6.7	34	4	7	4	7
ZINC000409415720	O=C1C(=[N+]=Nc2ccc(S(=O)(=O)O)cc2)C(=C(O)O)NN1c1ccc(S(=O)(=O)O)cc1	469.012	0.749	-4.6	31	3	4	5	9
ZINC000256000206	C=CC1=C(C(=O)O)N2C(=O)[C@@H](NC(=O)C(=NO)c3csc(N)n3)[C@H]2SC1	395.036	-0.172	-6.3	26	3	5	4	9
CHEMBL107952	CNc1nc(Cl)nc2c1ncn2CC(CO)COP(=O)(O)O	351.05	0.239	-6	22	2	7	4	8
CHEMBL3621241	Nc1nc(N2CCOCC2)c3ncn(CC(=O)NCCC(=O)NO)c3n1	364.161	-1.743	-6.8	26	3	6	4	10
CHEMBL1199075	N[C@@H](C1CCCN1)C(=O)N[C@H]2CCC(=O)N(CC(=O)NO)C2=O	327.154	-2.795	-6.9	23	2	5	5	7
ZINC000017213192	Cc1ccc([N+](=O)[O-])cc1NC(=O)/C(=N/NC(=S)NN)[C@H]1SC(=S)N=C1O	427.019	0.892	-7	27	2	5	5	8
CHEMBL3800689	O[C@@H]1[C@@H](COP(=O)(O)O)O[C@H](Oc2ccc(cc2)c3ccccc3)[C@@H](O)[C@H]1O	412.092	0.649	-7.4	28	3	6	5	7
CHEMBL1965790	O\N=C/1\C(\S\C(\C(\S1)=N\O)=N/O)=N\O	235.967	0.617	-5.9	14	1	0	4	10
CHEMBL1213802	CCCc1ccc(Cc2csc(n2)[C@@H]3O[C@H](CO)[C@@H](O)[C@H](O)[C@H]3O)cc1	379.145	1.201	-7.3	26	3	6	4	7
CHEMBL3546932	O=C1c2cc(NC3=NCCN3)ccc2Nc4ccc(NC5=NCCN5)cc14	361.165	1.423	-6.7	27	5	2	5	7
CHEMBL496156	OP(=O)(O)C(C(C1SC(=S)NC1=O)c2ccccc2[N+](=O)[O-])P(=O)(O)O	441.946	0.876	-7.6	26	2	6	5	7
ZINC000095101348	COc1cc([C@H]2c3c(O)n[nH]c3C[C@@](C)(O)[C@@H]2C(=O)OC(C)C)ccc1O	376.163	1.836	-7.5	27	3	4	4	7
CHEMBL490553	COc1ccc(F)cc1c2nc(C(=O)N=C(N)N)c(C)[nH]2.CS(=O)(=O)O.CS(=O)(=O)O	483.089	-0.046	-2.9	31	2	3	5	7
CHEMBL3969063	N[C@]1([C@H](OCc2ccc(Cl)c(Cl)c2)[C@@H](Sc3nc[nH]n3)[C@H]4[C@@H]([C@@H]14)C(=O)O)C(=O)O	458.022	1.9	-6.9	29	4	7	4	7
CHEMBL27147	CNp1(NC)n[p@@](NC)(n[p@@](NC)(n1)N2CC2)N3CC3	339.137	1.347	-4.9	20	3	6	4	9
ZINC000008382902	Nn1c(S)nnc1Cc1nnc(S)n1N	244.031	-1.535	-5.6	15	2	2	4	10
CHEMBL3142639	NC1=CS(=O)(=O)O[C@@]12[C@@H](O)[C@@H](O[C@@H]2CO)N3C=CC(=O)NC3=O	347.042	-3.314	-6.2	23	3	2	4	10
CHEMBL337909	NC1=NC(=O)C2C(N=CN2CCOCP(=O)(O)O)C(=O)N1	319.068	-2.81	-6.2	21	2	5	4	7
CHEMBL484638	OC[C@H]1O[C@@H](OC2Oc3ccccc3N(O)C2=O)[C@H](O)[C@@H](O)[C@@H]1O	343.09	-2.056	-7.2	24	3	3	5	9
CHEMBL41917	CC1=C(N)C(=O)c2c(COC(=O)N)c3C(O)C(N)Cn3c2C1=O	320.112	-0.931	-8.1	23	3	2	4	8
ZINC000020135017	Cc1ccc(NC(=O)C[C@@H]2SC(NC3(c4c(O)[nH]c(=O)[nH]c4=O)CCCC3)=NC2=O)cc1	457.142	1.463	-7.7	32	4	5	5	7
CHEMBL1499720	CC(OC(=O)c1ccc(NS(=O)(=O)c2ccc3[nH]c(O)nc3c2)cc1)C(=O)N	404.079	1.1	-7	28	3	6	4	7
CHEMBL1424242	COC(=O)c1ccc(NC(=O)CNCc2ccncc2)cc1.OC(=O)C(=O)O	389.122	0.752	-3.3	28	2	6	4	7
CHEMBL3586146	OC[C@@H](NC(=O)c1nc[nH]n1)[C@H](O)c2ccc(cc2)[N+](=O)[O-]	307.092	-0.463	-6.8	22	2	6	4	7
ZINC000039438676	Nc1nc(O)c(CCC[C@@H](O)C(=O)O)c(O)n1	243.086	-0.762	-6	17	1	5	5	7
CHEMBL599576	O[C@@H]1C=C[C@](O)(C[C@H]1OC(=O)\C=C\c2ccc(O)c(O)c2)C(=O)O	336.085	0.159	-7.4	24	2	4	5	7
ZINC000100927406	CC1=C(C(N)=O)C(=O)[C@@H](CC(=O)O)C(=O)[C@@H]1C=C1C(=O)NC(=O)NC1=O	363.07	-2.06	-6.8	26	2	4	4	7
CHEMBL1962730	NC(=N)NC(=O)c1nc(Cl)c(NCCSCc2ccccc2)nc1N	379.098	1.681	-7.4	25	2	7	5	7
CHEMBL3247598	Nc1ccc(CS[C@H]2O[C@H](CO)[C@@H](O)[C@H](O)[C@@H]2O)cc1	301.098	-0.698	-6.8	20	2	4	5	7
CHEMBL3287018	CC(C)[C@H](NC(=O)c1csc(n1)c2csc(C)n2)C(=O)NCC(=O)NO	397.088	0.951	-6	26	2	7	4	8
CHEMBL1201097	Cl.CCC[C@@H]1C[C@H](N(C)C1)C(=O)N[C@H]([C@@H](C)O)[C@H]2O[C@H](SC)[C@H](O)[C@@H](O)[C@H]2O	442.19	-0.435	-5.9	28	2	7	5	8
ZINC000013731265	Nc1c(O)c2c(O)cc(S(=O)(=O)O)cc2cc1S(=O)(=O)O	334.977	0.327	-7.3	21	2	2	5	7
CHEMBL484690	Cc1scnc1c2nc(c[nH]2)[C@@H](O)[C@H](O)[C@H](O)CO	285.078	-0.411	-6.1	19	2	5	5	7
CHEMBL4083839	CC(C)(NS(=O)(=O)C)[C@H](NC(=O)c1ccc(cc1)c2oc3ccccc3n2)C(=O)NO	446.126	1.426	-7	31	3	7	4	7
ZINC000390771784	CC(C)(C)OC(=O)N[C@@H]1C[C@H](NC(=O)OC(C)(C)C)[C@@H](O)[C@@H](O)[C@H]1O	362.205	0.259	-6.2	25	1	2	5	7
CHEMBL17752	CNCc1oc(cc1)[C@H]2C[C@@H](CN2)SC3=C(N4[C@H]([C@H]3C)[C@@H]([C@@H](C)O)C4=O)C(=O)O	421.167	1.289	-6.4	29	4	7	4	7
ZINC000018996328	CCOC(=O)[C@H]1C(c2ccc(O)cc2)[C@H](C(=O)OCC)[C@](O)(C(F)(F)F)N[C@]1(O)C(F)(F)F	489.122	1.939	-4.9	33	2	5	4	8
CHEMBL1349300	OC(=O)CNC(=O)CC1SC(=NC1=O)NNC2=NC(=O)CS2	345.02	-1.701	-7	22	2	4	4	8
CHEMBL287830	Nc1ncnc2c1ncn2NCCOCP(=O)(O)O	288.074	-0.896	-5.6	19	2	6	4	8
ZINC000004200817	CC(=O)N[C@@H]1C=C(C(=O)N[C@@H](CCS(C)(=O)=O)C(N)=O)C[C@@H](O)[C@@H]1O	377.126	-3.052	-7.1	25	1	7	5	7
CHEMBL1800454	Nc1nc(cc(n1)c2cc(ccc2O)N3C[C@H](O)[C@@H](O)C3)C4CC4	328.154	0.851	-6.7	24	4	3	4	7
ZINC000003221555	C[C@H](NS(=O)(=O)c1ccc2c(c1)C(=O)c1cc(S(=O)(=O)N[C@@H](C)C(=O)O)ccc1-2)C(=O)O	482.045	0.401	-5	32	3	8	4	7
ZINC000003900043	C[C@H]1C[C@H](NNc2ccc([N+](=O)[O-])cc2[N+](=O)[O-])NC(=S)N1	326.08	1.002	-7.1	22	2	5	4	7
CHEMBL3957257	CNc1cc(O)c2C(=O)O[C@@H](C)[C@H](C)\C=C\C(=O)[C@H](O)[C@@H](O)C\C=C\c2c1	375.168	1.879	-5	27	2	1	4	7
ZINC000329069648	O=S(=O)(O)c1ccc(NNc2cc(C3CC3)nc(NCCO)n2)cc1	365.116	1.444	-6.6	25	3	8	5	8
CHEMBL170687	OC[C@H]1O[C@@H](NCC(=O)Oc2ccc(cc2)C(=O)c3ccccc3Cl)[C@H](O)[C@@H](O)[C@@H]1O	451.103	-0.134	-7	31	3	7	5	9
CHEMBL1208039	OC(C(=O)c1ccc(cc1)c2ccc(cc2)C(=O)C(O)S(=O)(=O)O)S(=O)(=O)O	430.003	0.131	-4.7	28	2	7	4	8
CHEMBL113696	O=C1NC(=O)C(C(C2C(=O)NC(=O)NC2=O)c3ccnc4ccccc34)C(=O)N1	395.087	-0.717	-7.7	29	4	3	4	7
ZINC000101268480	CC1(C)OC(=O)C(=CNc2ccc(S(=O)(=O)NC(=N)N)cc2)C(=O)O1	368.079	-0.01	-6.9	25	2	4	4	8
ZINC000004803761	OC[C@@H]1O[C@H](O)[C@H](/N=C\c2ccc3c(c2)OCO3)[C@H](O)[C@@H]1O	311.101	-1.366	-6.7	22	3	3	4	8
CHEMBL3769761	OC[C@@H](O[C@@H](CO)c1ccc(cc1)C#Cc2ccc(CN3CCOCC3)cc2)C(=O)NO	440.195	0.835	-2.2	32	3	8	4	7
CHEMBL3920846	O=C(NC1CCNC1)c2cc(cs2)c3cc(NC4CC4)n5ncc(\C=C\6/NC(=O)NC6=O)c5n3	478.154	1.304	-7.7	34	6	6	5	9
ZINC000108318223	O=S1(=O)NC[C@H](O)CNC[C@@]2(C[C@@H](O)[C@@H](O)C2)COc2cc(-c3cccnc3)ccc21	449.162	-0.128	-8.8	31	4	1	5	8
ZINC000006294957	COc1cccc(/C=N/Nc2nc3c(nc[nH]c3=O)[nH]2)c1O	300.097	0.806	-6.6	22	3	4	4	7
CHEMBL1098400	CNC(=O)[C@H]1O[C@H]([C@H](O)[C@@H]1O)n2cnc3c(NCC4CC(C)(C)N([O])C4(C)C)ncnc23	448.231	-0.172	-4.6	32	4	5	4	10
CHEMBL3221799	O[C@@H]1C[C@@](O)(C=C([C@H]1O)c2cn(nn2)c3ccc(F)cc3)C(=O)O	335.092	-0.269	-7	24	3	3	4	7
ZINC000097729514	CCCNS(=O)(=O)c1ccc(NC(=O)NCc2nnc(N)s2)cc1	370.088	1.13	-6.2	24	2	7	4	7
CHEMBL1668110	COc1cc(ccc1O)[C@H](O)[C@H]2CO[C@@H]([C@H]2CO)c3ccc(O)c(O)c3	362.137	1.842	-6.8	26	3	5	5	7
CHEMBL3318259	CN(C)CCCC1(CCOC1=O)C(=O)C.OC(C(O)C(=O)O)C(=O)O	363.153	-1.272	-5.3	25	1	8	4	8
CHEMBL1203340	Cl.Cl.CC(C)COCC1CNc2nc(N)nc(O)c2N1	325.107	1.487	-6.3	20	2	4	4	7
ZINC000253535296	Nc1nc(O)cc([C@H]2C[C@@H](NC(=O)c3ccc4[nH]nnc4c3)C2)n1	325.129	0.712	-6.4	24	4	3	4	7
CHEMBL409306	NS(=O)(=O)c1ccc(cc1)c2cn(nn2)[C@H]3OC[C@@H](O)[C@@H](O)[C@@H]3O	356.079	-1.796	-5.8	24	3	3	4	9
CHEMBL3230447	OC(CNCCc1ccc(O)cc1)COc2cccc3C(=O)CCCc23.OC(=O)C(=O)O	445.174	1.639	-3.3	32	3	8	5	7
ZINC000244852675	Nc1nc(NCCc2nnn[nH]2)cc([C@H]2C[C@@H](O)C2)n1	276.145	-0.535	-7	20	3	5	4	8
CHEMBL1380113	Nc1nc(NCCO)nc(NCC2CCCO2)c1[N+](=O)[O-]	298.139	-0.038	-6.8	21	2	7	4	9
CHEMBL284610	CN1N=C(S/C/1=N/C(=O)CNCCNCC(=O)O)S(=O)(=O)N	352.062	-3.18	-6	22	1	8	4	9
CHEMBL1741970	N[C-]1N=C(N)C(=C(N)[N+]1=O)NCO	186.087	-2.177	-5.5	13	1	2	5	7
ZINC000253535295	CC(C)Cc1cc(C(=O)N[C@H]2C[C@@H](c3cc(O)nc(N)n3)C2)nc(N)n1	357.191	1.011	-6.2	26	3	5	4	8
CHEMBL2098335	CN1CCCN(CC1)c2cc(C)nc(Nc3cc(F)cc(F)c3)n2.OC(C(O)C(=O)O)C(=O)O	483.193	0.826	-4.5	34	3	6	5	9
CHEMBL3775909	[O-][N+]1=C(Nc2ccc(NC(=O)c3ccc(NC4=[N+]([O-])CCN4)cc3)cc2)NCC1	395.171	0.702	-4.3	29	4	4	5	7
CHEMBL3967792	CC(=O)c1c(O)c(C)c(O)c2c1OC3=CC(=O)\C(=C(/N)\O)\C(=O)[C@]23C	345.085	1.023	-7	25	3	1	4	8
ZINC000077319528	Cc1c(Cl)cccc1Nc1ccccc1C(=O)O[C@@H]1O[C@H](C(=O)O)[C@@H](O)[C@H](O)[C@H]1O	437.088	1.441	-8.1	30	3	5	5	8
ZINC000016951738	Nc1cc(N)nc(NCCC[C@H](N)C(=O)O)n1	240.133	-0.755	-5.5	17	1	6	5	7
CHEMBL3914255	NC(=O)[C@H](CO)Nc1cc(nc(n1)c2ccc(Oc3ccc(F)cc3)cc2)C(=O)N	411.134	1.432	-6.9	30	3	8	4	7
CHEMBL2135576	NNC(=O)CNC(=O)Nc1nnc(S)s1	248.015	-1.062	-6.1	15	1	3	5	7
CHEMBL29568	CN(C)[C@H]1C2CC3C(C(O)[C@]2(O)C(=C(C(=O)C)C1=O)O)C(=O)c4c(O)cccc4[C@@]3(C)O	445.174	0.054	0.4	32	4	2	5	9
CHEMBL3815139	CCCNc1nc2c(N)ncnc2n1[C@@H]3S[C@H](CO)[C@@H](O)[C@H]3O	340.132	-0.442	-6.3	23	3	5	5	10
CHEMBL1161899	CCN(CCO)Cc1c[nH]c2c(O)nc(N)nc12.CC(=O)O	311.159	0.151	-2.8	22	2	5	5	7
ZINC000016970127	NC(=O)NC(=O)/C=C/C(=O)OCCOC(=O)/C=C/C(=O)NC(N)=O	342.081	-2.425	-6.8	24	0	7	4	8
ZINC000015020084	CC(=O)N[C@@H]1[C@@H](O)[C@H](O)[C@@H](COS(=O)(=O)O)O[C@H]1Oc1ccc2c(C)cc(=O)oc2c1	459.084	-0.749	-7	31	3	6	4	10
CHEMBL545819	COc1cc(Cc2cnc(N)nc2N)c3C=CC(C)(C)Oc3c1OC.CC(O)C(=O)O	432.201	1.885	-3.5	31	3	5	4	9
CHEMBL3342659	Cc1ccc(cc1C)c2cn([C@@H]3O[C@H](CO)[C@@H](O)[C@H]3O)c4ncnc(N)c24	370.164	0.909	-7.9	27	4	3	4	8
CHEMBL1851991	OC[C@@H](O)[C@@H](O)[C@H](O)c1c[nH]c(n1)C2=NOCC2	257.101	-1.718	-6.2	18	2	5	5	7
CHEMBL1975040	CCOC(=O)[C@H](CO)NC1=C(Cl)C(=O)c2c(O)ccc(O)c2C1=O	355.046	0.441	-7.3	24	2	5	4	8
CHEMBL4098729	CC\C=C/[C@H](O)[C@H](O)C1=C(C)C(=O)[C@@]2(C1)[C@@H](O)[C@@](NC2=O)(OC)C(=O)c3ccccc3	429.179	0.666	-6.9	31	3	7	4	7
CHEMBL2013180	N\C(=N/O)\c1ncc(NCC(=O)O)nc1N	226.081	-1.35	-6.2	16	1	4	5	7
CHEMBL250687	CCCSc1nc(N[C@@H]2C[C@H]2c3ccccc3)c4nnn([C@@H]5C[C@H](CO)[C@@H](O)[C@H]5O)c4n1	456.194	1.966	-7.1	32	5	8	4	10
CHEMBL1980364	COc1cc(\C=N\N=C(/N)\NO)ccc1O.Cc2ccc(cc2)S(=O)(=O)O	396.11	1.27	-5.4	27	2	4	5	7
CHEMBL3229854	CCNC(=O)c1cccc(N\C(=C\2/C(=O)OC(=O)C(=C2O)C(=O)C)\O)c1	360.096	1.102	-7.7	26	2	5	4	8
ZINC000016450229	N/C(C/C(N)=N/Nc1ccccc1[N+](=O)[O-])=N\Nc1ccccc1[N+](=O)[O-]	372.129	1.962	-7.5	27	2	8	4	8
CHEMBL2021614	COC(=O)CNC(=O)CNC(=O)CN1CCCNCCCNCCC1	357.238	-1.943	-6.4	25	1	6	4	7
CHEMBL582936	OP(=O)(O)OP(=O)(O)OP(=O)(O)CCCN1C=CC(=O)NC1=O	393.973	-0.662	-6.4	23	1	8	5	8
CHEMBL1775075	Nc1n[nH]c(N)c1\N=N\c2ccc(cc2)S(=O)(=O)N	281.069	0.637	-6.3	19	2	3	4	7
ZINC000016949224	COc1cccc(N/N=C2/C(=N)NN(S(C)(=O)=O)C2=N)c1	310.085	0.197	-7.3	21	2	4	4	7
ZINC001772591450	CC(=O)O[C@H](c1ccccc1)[C@H](NC(=O)[C@]1(N)CC[C@](O)(c2ccccc2)[C@H]1OC(C)=O)C(=O)O	484.185	1.171	-7.1	35	3	8	4	8
CHEMBL1852532	C[C@H](N)C(=O)N1CC2(C[C@H]1C(=O)NCCCCCC(=O)NO)SCCS2	404.155	0.293	-6.6	26	2	8	4	7
CHEMBL3668579	Cc1cnc(CNC(=O)[C@@H]2C[C@H](N)CN2C(=O)Nc3cn(C(=O)N)c4ccccc34)s1	441.158	1.583	-6.1	31	4	4	4	7
CHEMBL210180	N.CCOC(=O)C(Cc1ccc(NS(=O)(=O)O)cc1)(NC(=O)OC(C)(C)C)C(=O)OC	463.162	1.605	-1.2	31	1	8	4	9
CHEMBL145118	N\C(=N\O)\c1ccc(nc1)c2oc(cc2)c3ccc(cn3)\C(=N\O)\N	338.113	1.593	-6.2	25	3	4	4	7
CHEMBL133535	C[C@@H](O)[C@@H]1[C@H]2SC(=C(N2C1=O)C(=O)O)CN(C)C(CO)C(=O)N	345.099	-2.027	-5.6	23	2	7	4	7
CHEMBL590271	OC[C@H]1O[C@H]([C@H](O)[C@@H](O)[C@@H]1O)c2ccc(Cl)c(Cc3nnc(s3)c4cscn4)c2	455.038	1.421	-7.5	29	4	5	4	10
CHEMBL2263129	COc1cc(cc(OC)c1OC)C2NC(=S)NC(=C2C(=O)NNC(=O)c3ccccc3O)C	472.142	1.672	-7.5	33	3	6	5	7
CHEMBL1672009	Nc1ncnc2c1ncn2[C@H]3[C@H](O)[C@H](O)C(=C3Br)CO	341.012	-0.674	-6.7	20	3	2	4	8
CHEMBL1182176	CN1C[C@@H](C[C@H]1C(=O)N)NC(=O)[C@@H](N)CCC\N=C(/N)\N[N+](=O)[O-]	344.192	-3.136	-6.5	24	1	8	5	7
CHEMBL32820	CNC(=O)C1=C(N2N(C[C@H](NC(=O)\C(=N/OC)\c3csc(N)n3)C2=O)C1)C(=O)O	423.096	-2.282	-5.8	29	3	6	4	10
CHEMBL1444407	Nc1ccc(cc1)S(=O)(=O)NNC(=O)C(=O)NNc2ccccn2	350.08	-0.883	-7.6	24	2	5	5	7
ZINC000100637957	O=C1O[C@H]([C@H](O)[C@H](O)CO)C(O)=C1O	206.043	-2.046	-5.4	14	1	3	5	7
CHEMBL361060	NCC[C@@H](NC(=O)c1oc(cc1)c2cccc(NC(=O)c3nncs3)c2)C(=O)N4CCNCC4	483.169	0.929	-5	34	4	8	4	9
CHEMBL153254	CNc1nc(Cl)nc2c1ncn2CC(CP(=O)(O)O)CP(=O)(O)O	399.026	0.493	-6.5	24	2	7	5	7
ZINC000239377962	Cc1ccc([N+](=O)[O-])cc1N[C@@H]1O[C@H]([C@H](O)CO)[C@H](O)[C@@H]1O	314.111	-0.885	-6.5	22	2	5	5	8
ZINC000225438270	CC(C)(C)c1cc(/C=N/NC2=NCCN2)c(O)c(/C=N/NC2=NCCN2)c1	370.223	0.455	-6.9	27	3	4	5	9
ZINC000031166571	COC(=O)[C@@](O)(CC(=O)O)[C@@H](OC(=O)/C=C/c1ccc(O)cc1)C(=O)O	368.074	-0.219	-6.3	26	1	8	4	8
CHEMBL1742956	COC(=O)[C@@H]1O[C@@H](SCCN)[C@@H](O)[C@H](O)[C@H]1O	267.078	-2.341	-6	17	1	4	4	8
CHEMBL3221801	O[C@@H]1C[C@@](O)(C=C([C@H]1O)c2cn(nn2)c3cccc(c3)C(=O)O)C(=O)O	361.091	-0.71	-6.5	26	3	4	5	8
CHEMBL1091132	CO[C@@H]1O[C@H](Cn2cc(nn2)c3ccc(N)cc3)[C@H](O)[C@H](O)[C@H]1O	336.143	-1.019	-6.7	24	3	4	4	9
CHEMBL3425995	COC(=O)[C@]1(F)O[C@@H]([C@H](O)[C@H](O)CO)[C@H](NC(=O)C)[C@@H](N)[C@H]1F	342.124	-2.892	-6.2	23	1	5	5	8
ZINC000000510095	CC(C)[C@H]1Cc2c(sc3nc(NN)nc(NN)c23)CO1	294.126	1.36	-6.8	20	3	3	4	8
CHEMBL1205886	FC(F)(F)c1cc(NC(=O)c2nnn[nH]2)c(Cl)c(NC(=O)c3nnn[nH]3)c1	402.032	0.89	-7	27	3	4	4	8
ZINC000006568063	O=C1/C(=C\c2ccccc2)SC(=S)N1[C@H]1O[C@@H](CO)[C@@H](O)[C@@H](O)[C@H]1O	383.05	-0.312	-6.7	25	3	3	4	8
CHEMBL85164	CN(C)C(=O)COC(=O)Cc1ccc(OC(=O)c2ccc(NC(=N)N)cc2)cc1.CS(=O)(=O)O	494.147	0.889	-3	34	2	7	4	8
ZINC000006265862	COC(=O)C1=C(NN)N[C@@H](C(=O)c2ccccc2)C1=N	274.107	-0.291	-7	20	2	4	4	7
ZINC000044699305	Cc1cc(=O)oc2cc(O[C@H]3O[C@H](CO)[C@@H](O)[C@H](O)[C@H]3NS(=O)(=O)O)ccc12	417.073	-1.32	-7.8	28	3	5	5	9
ZINC000019331334	CCC12CN3CC(CC)(CN(C1)C3[C@H](O)[C@H](O)[C@@H](O)CO)C2=O	328.2	-1.606	-6.6	23	4	6	4	7
ZINC000244724716	C[C@@H]1O[C@H](Nc2ccc(Cl)cc2[N+](=O)[O-])[C@H](O)[C@@H](O)[C@@H]1O	318.062	0.488	-7.1	21	2	3	4	7
CHEMBL593598	ONc1nc(NO)nc(n1)N2CCOCC2	228.097	-0.69	-6.4	16	2	3	4	9
CHEMBL3272696	CCOC(=O)NNC(=O)[C@@H]1CCCN1C(=O)[C@H](C)NC(=O)[C@H](C)NC(=O)OC(C)(C)C	443.238	0.173	-6.9	31	1	6	4	7
ZINC000001614230	Nc1nc(Cl)cc(NCCCNc2cc(Cl)nc(N)n2)n1	328.072	1.652	-6.5	21	2	6	4	8
CHEMBL3906292	CN(C)C1CCC(CC1)Nc2nc(NC3CC3)n4ncc(\C=C\5/NC(=O)NC5=O)c4n2	425.229	1.164	-6.5	31	5	6	4	9
CHEMBL254205	O[C@H]1C[C@@H](O[C@@H]1OP(=O)(O)O)N2C=C(C=O)C(=O)NC2=O	322.02	-1.936	-6.7	21	2	4	4	8
CHEMBL3974969	O=C1NC(=O)\C(=C\c2cnn3c(NC4CC4)nc(NC5CCCc6ncccc56)nc23)\N1	431.182	1.763	-8.8	32	6	5	4	9
ZINC000005567294	Cc1ccc(S(=O)(=O)n2nc([C@@H]3O[C@@H](CO)[C@@H](O)[C@@H]3O)c(O)c2C(N)=O)cc1	413.089	-1.613	-7.6	28	3	5	5	10
CHEMBL3215597	Cl.Cl.NCCCC[C@H](N)C(=O)N[C@H]1CCC(=O)N(CC(=O)NO)C1=O	401.123	-1.574	-6.5	25	1	8	5	7
ZINC000003878827	O=[N+]([O-])c1cc(S(=O)(=O)NCCO)ccc1NCCO	305.068	-0.73	-6.6	20	1	8	4	7
CHEMBL52172	CNS(=O)(=O)NC(=N)CCSCc1csc(N=C(N)N)n1	351.061	-0.298	-6.1	21	1	8	5	7
ZINC000067561917	Cc1nn2cc(CNC(=O)C3=C(C)NC(=O)N[C@@H]3c3[nH]cnc3C)nc2s1	386.127	1.075	-7.5	27	4	4	4	7
CHEMBL1683328	CC(=O)NCc1cn(nn1)[C@@H]2O[C@H](COP(=O)(O)O)[C@@H](O)[C@H]2O	352.078	-2.357	-6.6	23	2	6	5	9
CHEMBL1159474	OC[C@H]1OC(Oc2ccc(cc2)N=[N+]=[N-])[C@H](O)[C@@H](O)[C@@H]1O	297.096	-0.193	-7.2	21	2	4	4	7
CHEMBL78681	CN(Cc1nn[nH]n1)NC(=O)C[C@H](N)C[C@@H](O)CN	272.171	-2.91	-5.9	19	1	8	5	8
ZINC000025667512	CS(=O)(=O)N/N=C1\S[C@H](c2ccc(N)cc2)NN1CCCS(=O)(=O)O	409.055	-0.081	-6	25	2	7	4	8
CHEMBL2088109	Cc1cc(Nc2ccnc(NCc3onc(c3)C(=O)N)n2)n[nH]1	314.124	0.951	-7.6	23	3	6	4	8
ZINC000263584868	CC(=O)c1c2c(c(O)c(C)c1O)[C@]1(C)C(=CC(=O)/C(=C(/C)N[C@@H](C)CO)C1=O)O2	401.147	1.539	-6.4	29	3	4	4	8
ZINC000101763390	COc1cc([C@H]2CC(c3c(O)[nH]c(=S)n(C)c3=O)=NN2)ccc1O	348.089	1.301	-6.5	24	3	3	4	8
CHEMBL3769698	NCCCCCCNC(=O)Nc1cc(nc(N)[n+]1[O-])N2CCCCC2.OC(=O)C(F)(F)F	465.231	1.561	-4	32	2	8	5	7
ZINC000018247469	N#Cc1cc2c(N)c(C(=O)Nc3ccccc3C(N)=O)sc2nc1N	352.074	1.684	-6.7	25	3	3	4	7
ZINC000001684444	Nc1nc(Nc2ccc(C3=NCCN3)cc2)nc(Nc2ccc(C3=NCCN3)cc2)n1	414.203	1.641	-7.5	31	5	6	5	10
CHEMBL3544799	CC1(CCOC2O[C@@H]([C@@H](O)[C@H](O)[C@H]2O)C(=O)O)CC(=O)NC1=O	333.106	-2.662	-7	23	2	5	5	8
ZINC000000506272	C[C@H]1CCc2c(sc3nc(NN)nc(NN)c23)C1	264.116	1.387	-6.5	18	3	2	4	7
ZINC000017211948	COc1ccc([C@H](O)/C(=N\NC(N)=S)c2nc3ccc([N+](=O)[O-])cc3nc2O)cc1OC	458.101	1.532	-6.5	32	3	7	4	10
ZINC000082111326	O=c1ccn([C@H]2O[C@@H](COP(=O)(O)O)[C@H](O)[C@@H]2O)c(=S)[nH]1	340.013	-1.366	-6.9	21	2	4	5	8
ZINC000016889991	N=c1nc(N)nc(N)n1-c1ccc(S(=O)(=O)O)cc1	282.054	-0.842	-6.4	19	2	2	4	8
CHEMBL3929814	OC(=O)[C@H]1O[C@H]1C(=O)N[C@@H](Cc2c[nH]cn2)C(=O)Nc3nc4ccc(F)cc4s3	419.07	0.677	-7	29	4	7	4	7
CHEMBL1910274	Nc1nc(NCCO)nc2nc(NCCO)c(cc12)C#N	289.129	-0.713	-6.6	21	2	6	5	9
CHEMBL1980951	COc1ccc(\C=N\N=C(/N)\NO)c(OC)c1C.Cc2ccc(cc2)S(=O)(=O)O	424.142	1.881	-5.5	29	2	5	4	7
CHEMBL33088	NS(=O)(=O)c1cc(c(NC(=O)CNCC(=O)O)c(Cl)c1Cl)S(=O)(=O)N	433.952	-1.099	-6.2	25	1	7	5	7
ZINC000013805573	CNc1nc(Cl)nc2c1ncn2[C@@H]1C[C@@H](OP(=O)(O)O)[C@@]2(COP(=O)(O)O)C[C@@H]12	469.032	1.06	-6.1	29	4	7	5	9
CHEMBL3526680	CCN(CC)C(=O)[C@@]1(C[C@@H]1CNC(=O)O[C@@H]2O[C@@H]([C@@H](O)[C@H](O)[C@H]2O)C(=O)O)c3ccccc3	466.195	-0.569	-6.2	33	3	8	5	8
ZINC000040476927	COC(=O)c1c(C)c(C(=O)Nc2ccccc2)sc1NC=C1C(=O)NC(=S)NC1=O	444.056	1.922	-6.6	30	3	5	4	8
ZINC000096602702	O=C1c2cccc(NCS(=O)(=O)O)c2C(=O)c2cccc(NCS(=O)(=O)O)c21	426.019	0.976	-6.5	28	3	6	4	8
CHEMBL1406495	Nc1cc(N)nc(SCC(=O)NNC(=O)c2ccc(Cl)cc2)n1	352.051	0.848	-7.6	23	2	4	4	7
CHEMBL147764	CC1(CO)COc2c(NC(CO)CO)ccc(C(=O)c3ccccc3)c2N1	372.169	1.238	-6.7	27	3	7	5	7
CHEMBL1981657	N\C(=N/N=C\c1oc(cc1)c2ccc(O)c(c2)C(=O)O)\N[N+](=O)[O-]	333.071	0.78	-7.5	24	2	5	4	7
ZINC000097915078	O=C(C[C@H]1NC(=O)NC1=O)NCCNc1ncnc2sccc21	334.085	-0.183	-6.7	23	3	6	4	7
CHEMBL562640	OC[C@H]1O[C@H]([C@H](O)[C@@H](O)[C@@H]1O)c2oc(nn2)c3ccc(O)cc3	324.096	-1.043	-6.6	23	3	3	5	9
CHEMBL3679702	OC[C@H]1O[C@H]([C@H](O)[C@@H](O)[C@@H]1O)c2ccc(Cl)c(Cc3nccnn3)c2	367.093	-0.369	-7	25	3	4	4	8
CHEMBL1192329	CC1(C)N=C(N)N=C(N)N1c2ccc(Cc3ccc(cc3)N4C(=NC(=NC4(C)C)N)N)cc2	446.265	1.648	-1	33	4	4	4	10
ZINC000226939768	O=[N+]([O-])c1cc(N[C@@H]2OC[C@H](O)[C@@H](O)[C@@H]2O)ccc1S(=O)(=O)O	350.042	-1.308	-6.6	23	2	4	5	9
ZINC000019320253	CCCCC12CN3CC(C)(CN(C1)C3[C@@H](O)[C@H](O)[C@H](O)CO)C2=O	342.215	-1.216	-6.4	24	4	7	4	7
ZINC000101070981	Cc1nc(NC(=O)NCCN/C(O)=C2\N=CC=CC2=O)sc1C	335.105	1.408	-6.7	23	2	5	4	7
CHEMBL1545401	Cc1ccc(cc1)C(=O)NNC(=O)CSc2nc(N)cc(N)n2	332.106	0.503	-8	23	2	4	4	7
CHEMBL3248269	CC(=O)C1=C(O)\C(=C(/C)\Nc2ccc(O)c(NS(=O)(=O)C)c2)\C(=O)OC1=O	396.063	0.934	-6.6	27	2	5	4	9
CHEMBL1995214	CCc1nc(N)nc(C(=O)NCCNC(=O)c2nc(N)nc(CC)c2C)c1C	386.218	0.332	-7.1	28	2	7	4	8
CHEMBL478785	C[C@@H]1C[C@@H](O)[C@]2(O)[C@@]3(C)COC4O[C@](O)(C[C@@]12[C@H]4O)[C@]3(C)O	316.152	-1.298	-6.1	22	5	0	5	7
ZINC000299757779	Nc1nc(NC(CO)CO)cc([C@H]2CCOC2)n1	254.138	-0.672	-6.2	18	2	5	4	7
ZINC000002390410	CC(=O)Nc1nonc1NC(=O)CSc1nc(N)cc(N)n1	324.075	-0.287	-6.4	22	2	5	4	10
CHEMBL3220661	Nc1ccnc(NCCN\C(=N\C#N)\NCCSc2ccccc2)n1	356.153	1.279	-6.9	25	2	8	4	7
CHEMBL1995789	COc1cc(\C=N\N=C(/N)\NO)c(cc1OC)[N+](=O)[O-].Cc2ccc(cc2)S(=O)(=O)O	455.111	1.481	-5.4	31	2	6	4	9
CHEMBL1196573	CN\C(=C/[N+](=O)[O-])\NCc1cccc(n1)c2csc(N=C(N)N)n2	348.112	0.495	-7.1	24	2	7	4	8
CHEMBL3305164	O=C(c1ccc(NC2=NCCN2)cc1)c3cccc(NC4=NCCN4)c3	348.17	1.66	-7.6	26	4	4	4	7
ZINC000095346118	O=C(O)[C@@H](CS(=O)(=O)O)N/C=C1\C(=O)NC(=O)N(c2ccc(Br)cc2)C1=O	460.953	-0.154	-7.5	27	2	6	4	7
CHEMBL2036388	CC(C)CNc1nc(N)nc2c1ncn2\C=C/3\CC3(CO)CO	318.18	0.692	-6.2	23	3	6	4	8
CHEMBL1716723	COC(=O)[C@@H]1C[C@@]2(O)[C@H](O)[C@H](O)[C@H](O)C[C@H]2N1CC3CC3	301.153	-1.77	-6.9	21	3	3	4	7
CHEMBL235992	OC[C@@H](O)[C@@H]1O[C@H]([C@H](O)[C@H]1O)S(=O)(=O)N(Cc2ccccc2)Cc3ccccc3	423.135	-0.181	-6.9	29	3	8	4	7
ZINC000254738694	CCOC(=O)c1nc[nH]c1NN=C(C(N)=O)C(N)=S	284.069	-0.874	-6.1	19	1	6	4	7
ZINC000005811077	O=C(O)[C@@H]1OCCOCCO[C@H](C(=O)O)[C@H](C(=O)O)OCCOCCO[C@@H]1C(=O)O	440.117	-2.088	-4.5	30	1	4	4	10
ZINC000022048685	CC(=O)N[C@@H]1[C@@H](O)[C@@H](O)[C@@H](CO)O[C@@H]1Oc1ccc(N)cc1	312.132	-1.409	-7.3	22	2	4	5	7
CHEMBL1990908	C\C(=N/N=C(N)N)\c1sc(nc1C)c2nc(C)c(s2)\C(=N\N=C(N)N)\C	392.131	0.878	-5.3	26	2	5	4	8
CHEMBL4101745	N[C@@H](CCP(=O)(O)C(O)c1cc(ccc1O)[N+](=O)[O-])C(=O)O	334.057	0.364	-6.9	22	1	7	5	7
ZINC000019322878	CC12CN3CC(C)(CN(C1)C3[C@@H](O)[C@H](O)[C@H](O)CO)C2=O	300.169	-2.386	-6.4	21	4	4	4	7
ZINC000005760801	COc1nc(N[C@H]2OC[C@@H](O)[C@@H](O)[C@H]2O)c(C=O)c(=O)n1C	315.107	-2.548	-6.3	22	2	4	4	10
ZINC000006013664	O=C(O)CN(CC(=O)O)[C@H]1N=NNN1	203.065	-1.784	-5.5	14	1	5	4	7
CHEMBL89179	CC(C)C[C@@H]1[C@H](CCCOC(=O)NCCCC[C@H](NC1=O)C(=O)NCc2cccnc2)C(=O)NO	491.274	1.657	-7.1	35	2	6	5	7
ZINC000104211575	O=[N+]([O-])c1ccc(O)c(/C=N\C(CO)(CO)CO)c1	270.085	-0.565	-6.1	19	1	6	4	7
CHEMBL3302354	Cn1cc(NC(=O)c2cc(NC(=O)c3cc(cn3C)[N+](=O)[O-])cn2C)cc1C(=O)NCC(=N)N	469.182	0.781	-2.9	34	3	8	5	9
CHEMBL3764688	Nc1nonc1\C(=N/O)\NC(=N)c2ccccc2Br	323.997	1.165	-7.1	19	2	2	4	7
ZINC000005082431	C[C@@H](Sc1nc(N)c(NC(=O)c2ccc(Br)o2)c(=O)[nH]1)C(=O)O	401.963	1.525	-6.5	23	2	5	4	7
ZINC000225510431	CN(C)Cc1cn(C[C@H]2C[C@@H](NC(=O)Nc3cccnc3)[C@H](O)[C@@H]2O)nn1	375.202	-0.333	-6.9	27	3	6	4	8
ZINC000001587055	CC1(C)N=C(N)N=C(N)N1c1cccc(CNc2ccc(S(N)(=O)=O)cc2)c1	401.163	1.132	-7.3	28	3	5	4	8
CHEMBL607621	Nc1ccc(cc1)S(=O)(=O)OC[C@H]2O[C@H](O)[C@@H](O)[C@@H]2O	305.057	-1.587	-6.5	20	2	4	4	8
CHEMBL3230002	CC(=O)C1=C(O)\C(=C(/O)\Nc2cccc(N\C=N\N)c2)\C(=O)OC1=O	346.091	0.666	-7	25	2	5	5	9
CHEMBL3310894	OC[C@H]1O[C@@]2(S\C(=N/C(=O)c3cccc4ccccc34)\NC2=O)[C@H](O)[C@@H](O)[C@@H]1O	418.083	-0.631	-5.6	29	4	2	5	8
ZINC000006002486	CC(C)(C)OC(=O)C[C@H](NC(=O)OC(C)(C)C)C(=O)N[C@@H](C(=O)O)[C@H](O)c1ccccc1	452.216	1.915	-6.9	32	1	8	4	7
ZINC000004994355	Cc1cn([C@H]2O[C@@H]([C@H](O)C(N)=O)[C@@H](O)[C@H]2O)c(=O)[nH]c1=O	301.091	-3.69	-7	21	2	3	5	8
CHEMBL44506	NC(N)NC(=O)c1nc(Cl)c(N)nc1N	231.064	-1.775	-6.5	15	1	2	5	7
ZINC000009970915	Nc1c(Cc2c(N)n(Cc3ccccc3)c(=O)[nH]c2=O)c(=O)[nH]c(=O)n1Cc1ccccc1	446.17	0.238	-6.6	33	4	6	4	8
CHEMBL4102563	CC(C)NC(=O)CCc1cnc2N(O)C(=O)C(=C(N)c2c1)C(=O)NCc3ccc(F)cc3F	459.172	1.881	-7.1	33	3	7	4	7
ZINC000020479496	Nc1nc(SCC(=O)NCCNc2ccc([N+](=O)[O-])cn2)n[nH]1	338.091	0.01	-7.2	23	2	8	4	9
ZINC000015722216	COC(=O)[C@@H](N)CCCNC(=N)NS(=O)(=O)c1c(C)c2c(c(C)c1C)OC(C)(C)C2	440.209	1.409	-7.3	30	2	7	4	7
CHEMBL2139813	CN1CC(O)(SC1=S)C(O)C(O)C(O)CO	269.039	-2.286	-5.5	16	1	4	5	7
ZINC000257265512	O=C(NC(c1ccccc1)c1ccccc1)[C@@H]1CS[C@@H]2[C@H](O)[C@@H](O)[C@H](O)[C@H](O)C(=O)N12	444.136	-0.381	-4.9	31	4	4	5	7
CHEMBL3946508	NS(=O)(=O)OC[C@H]1C[C@@H](Nc2ncnc3[nH]c(nc23)c4ccccc4)[C@H](O)[C@@H]1O	420.122	-0.238	-7	29	4	6	5	9
ZINC000004416133	O=C1c2cc(S(=O)(=O)O)ccc2N/C1=C1\Nc2ccc(S(=O)(=O)O)cc2C1=O	421.988	1.308	-5.6	28	4	2	4	8
CHEMBL2375142	CC1=C(N2[C@H](SC1)[C@H](NC(=O)[C@H](N)c3cccc(NS(=O)(=O)C)c3)C2=O)C(=O)O	440.082	-0.184	-5.5	29	3	6	4	7
CHEMBL3272476	COc1cccc2C(=O)c3c(O)c4C[C@](O)(C[C@H](O)c4c(O)c3C(=O)c12)C(=O)O	400.079	0.677	-6	29	4	2	5	8
CHEMBL1352324	CC(O)CNCCCOc1cc(C)ccc1[N+](=O)[O-].OC(=O)C(=O)O	358.138	0.798	-3.3	25	1	8	4	7
CHEMBL284587	CN[p@]1(N)n[p@@](N)(NC)np(n1)(N2CC2)N3CC3	311.105	0.826	-5.7	18	3	4	4	9
ZINC000005670202	O=C(O)c1cc2nsnc2cc1[C@H](O)[C@H](O)C(=O)O	284.01	-0.132	-6.6	19	2	4	4	7
CHEMBL217445	CC(=O)N[C@H]1[C@@H](OC(=C[C@@H]1n2cc(nn2)c3ccc(F)cc3)C(=O)O)[C@H](O)[C@H](O)CO	436.139	-0.789	-4.8	31	3	7	5	9
ZINC000257219183	CC1(C)S[C@@H]2[C@H](O)[C@@H](O)[C@H](O)[C@H](O)C(=O)N2[C@@H]1C(=O)O	307.073	-2.423	-6.1	20	2	1	5	7
ZINC000008419115	C[C@@]1(CO)O[P@](=O)(O)O[P@@](=O)(O)OC[C@H]1O	277.996	-0.638	-5.3	16	1	1	4	7
ZINC000100071299	CC1=C(N)C(=O)C2=C(C1=O)N1C[C@H](N)[C@H](O)[C@]1(O)[C@@H]2COC(N)=O	338.123	-2.957	-7.1	24	3	2	5	9
CHEMBL145537	Nc1cc(cc2cc(cc(c12)S(=O)(=O)O)S(=O)(=O)O)S(=O)(=O)O	382.944	0.162	-7.7	23	2	3	4	7
CHEMBL1726759	OC(CNCC1COc2ccccc2O1)COCc3cccs3.OC(=O)C(=O)O	425.114	1.211	-3.3	29	3	8	4	8
ZINC000952970597	CC(C)[C@H]1NC(=O)CCN=C2C=C(CCNC(=O)[C@H](C)NC1=O)N=C(NC1Cc3ccccc3C1)N2	493.28	0.541	-6	36	4	2	5	7
ZINC000001582300	Nc1nc(N)nc(N/C=C/C(=O)O)n1	196.071	-0.954	-5.6	14	1	3	4	7
ZINC000044019928	O=C(O)[C@@H]1O[C@H](OC(=O)Cc2ccccc2Nc2c(Cl)cccc2Cl)[C@@H](O)[C@H](O)[C@H]1O	471.049	1.715	-6.6	31	3	6	5	8
ZINC000585263525	C[C@@]1(O)CNC[C@H](O)C[C@H]1n1cnc2c1ncnc2N	278.149	-0.945	-6.9	20	3	1	4	8
CHEMBL592902	OCC(NC1CCN(CC1)c2ncc(cn2)C(=O)NO)\C=C\c3ccccc3	383.196	1.228	-6.1	28	3	7	4	7
CHEMBL3681905	OC[C@H]1O[C@@H]2SC(=N[C@@H]2[C@@H](O)[C@@H]1O)NCCCF	280.089	-1.154	-6.2	18	2	4	4	7
ZINC000253534921	O=C(N[C@H](c1ccccn1)[C@H]1C[C@H](O)C1)c1cc(O)nc(O)n1	316.117	0.525	-7.1	23	3	4	4	7
CHEMBL1973559	N\C(=C(/NC(=O)C(=O)N\C(=C(/N)\C#N)\C#N)\C#N)\C#N	270.061	-2.346	-5.6	20	0	2	4	8
CHEMBL3978046	FC(F)(F)CNc1nc(NC2CCCC2)nc3c(\C=C\4/NC(=O)NC4=O)cnn13	410.143	1.633	-7.8	29	4	5	4	8
CHEMBL1938536	COc1ccc(cc1)\N=N\c2c(Cl)nc(N)nc2N[C@@H]3C[C@H](CO)[C@@H](O)[C@H]3O	408.131	1.651	-7	28	3	6	5	10
ZINC000100643593	C/C(=N\C(CO)(CO)CO)c1c(O)c2ccccc2n(-c2ccccc2)c1=O	382.153	1.221	-7.7	28	3	6	4	7
CHEMBL312188	CC(=O)N1CCC[C@@H]1C(=O)N[C@@H](CO)C(=O)N2CCC[C@@H]2C(=O)N[C@@H](CO)C(=O)N	427.207	-3.572	-6.5	30	2	8	5	7
CHEMBL1162113	CS[C@@H]1O[C@H](CO)[C@H](O)[C@H](NC(=O)c2ccc(C)cc2)[C@H]1OP(=O)(O)O	407.08	0.012	-6.9	26	2	6	5	7
ZINC000006620309	O=C(O)CCSc1nc(O)nc2[nH]c(O)nc21	256.027	0.331	-5.9	17	2	4	4	7
CHEMBL2000244	OCCNC1=C(N2CC2)C(=O)C(=C(N3CC3)C1=O)NCCO	308.148	-2.644	-5.9	22	3	8	4	8
ZINC000252642530	CON[C@@]1(C(C)=NN)NC(N)=NN=C1C	213.134	-1.538	-5.4	15	1	3	4	8
CHEMBL137366	CN(Cc1cnc2nc(N)nc(N)c2n1)c3ccc(cc3)C(=O)NC(Cc4c[nH]cn4)C(=O)O	462.188	0.369	-6.1	34	4	8	5	10
ZINC000077286005	CN(C)CC[C@@](O[C@@H]1O[C@H](C(=O)O)[C@@H](O)[C@H](O)[C@H]1O)(c1ccccc1)c1ccccc1Cl	465.155	1.444	-4.7	32	3	8	4	7
ZINC000006925801	Nn1c(S)nnc1N/N=C/c1ccc(I)cc1O	375.96	1.037	-5.8	18	2	3	4	8
ZINC000252619950	C[C@H](O)[C@H](O)[C@@H](O)C(C=NNc1ccccc1)=NNc1ccccc1	342.169	1.655	-7.5	25	2	8	5	7
CHEMBL3668608	COC(=O)[C@H](CC(C)C)NC(=O)[C@@H]1C[C@H](N)CN1C(=O)Nc2cn(C(=O)N)c3ccccc23	458.228	1.206	-6	33	3	6	4	7
ZINC000016952806	Cc1cc(NC(=O)CCc2ccc(N3C(N)=NC(N)=NC3(C)C)cc2)ccc1S(=O)(=O)O	458.174	1.999	-6.6	32	3	6	4	8
CHEMBL1314082	SC1=NCCN=C(S)NCCOCCOCCOCCN1	336.129	-0.199	-5.5	21	1	0	4	7
ZINC000223855695	COCc1nc(NCc2n[nH]c(N)n2)cc(C2CC(N)C2)n1	304.176	0.14	-7.1	22	3	6	4	8
ZINC000000506932	CC[C@]1(C)Cc2c(sc3nc(NN)nc(NN)c23)CO1	294.126	1.504	-6.6	20	3	3	4	8
ZINC000005447360	Nc1ncnc(N[C@H](CO)CCO)c1[N+](=O)[O-]	243.097	-0.878	-5.5	17	1	6	4	8
ZINC000059490019	C[C@@H]1CN(S(=O)(=O)c2cc([N+](=O)[O-])ccc2NNC=C2C(=O)NC(=O)NC2=O)C[C@@H](C)O1	468.106	-0.441	-6.9	32	3	6	4	10
CHEMBL2030919	N[C@@H](CSSC[C@H](NC(=O)C(=O)O)C(=O)O)C(=O)O	312.009	-1.566	-5.9	19	0	8	5	7
ZINC000253535875	COc1ccccc1-c1cc(C(=O)N[C@H]2C[C@@H](c3cc(O)nc(N)n3)C2)[nH]n1	380.16	1.839	-6.4	28	4	5	4	7
CHEMBL1652466	NC1=NC(=O)c2ncn(CCOCP(=O)(O)OP(=O)(O)O)c2N1	369.024	-1.029	-6.5	23	2	7	5	9
CHEMBL196073	NO[C@@H]1OC(CO)C(O)[C@H](O)C1O	195.074	-3.323	-5.1	13	1	2	5	7
CHEMBL3230003	CCOC(=O)CCC(=O)Nc1cccc(N\C(=C/2\C(=C(C(=O)C)C(=O)OC2=O)O)\O)c1	432.117	1.634	-6.7	31	2	8	4	10
ZINC000003524592	CNC(=O)NC(=O)CSc1nc(N)cc(N)n1	256.074	-0.811	-5.9	17	1	3	4	7
CHEMBL3645372	OCC(O)Cn1c(nc2cc(\C=C\C(=O)NO)ccc12)c3ccccn3	354.133	0.97	-7.3	26	3	6	4	7
ZINC000004186382	COC(=O)[C@H](CO)NC(=O)[C@H](C)NC(=O)CNC(=O)OC(C)(C)C	347.169	-1.334	-6	24	0	7	4	7
CHEMBL3785940	Cl.OC[C@H]1O[C@H]([C@H](O)[C@@H](O)[C@@H]1O)c2ccc3CCN[C@@H](c4cccs4)c3c2	413.106	0.92	-6.9	27	4	3	5	7
ZINC000018096883	COC(=O)[C@@H](NC(=O)C(=O)N[C@@H](C(=O)OC)C(C)(C)S)C(C)(C)S	380.108	-0.281	-4.8	24	0	6	4	8
ZINC000000009064	O=C(O)c1cc2cc(O)c(O)cc2c(C(=O)c2ccc(O)c(O)c2)n1	341.054	1.986	-8.1	25	3	3	5	7
CHEMBL1443992	COCCCNCC(=O)Nc1sc(C)c(C)c1C(=O)OC.OC(=O)C(=O)O	404.125	0.872	-3.3	27	1	8	4	8
ZINC000005956122	COc1ccc(-c2c(C#N)c(=S)n([C@@H]3O[C@@H](CO)[C@@H](O)[C@@H](O)[C@H]3O)c3c2CCCC3)cc1	458.151	1.616	-5	32	4	4	4	9
CHEMBL18049	CON(C)[C@@]12NC(=O)C(NC1=O)(OCCC2=C)[C@@H](O)[C@@](C)(O)CO	345.154	-2.801	-6.4	24	3	5	5	8
CHEMBL17116	NC1=NC(=O)C2N=C(COC2N1)c3ccc(cc3)C(=O)NC(CCC(=O)O)C(=O)O	417.128	-1.307	-5.4	30	3	7	5	8
ZINC000004822923	C[C@@]1(O)O[C@@H](n2c(Br)nc3c2ncnc3N)[C@@H](O)[C@@H]1O	345.007	-0.87	-6.6	20	3	1	4	9
ZINC000035636315	CCOC(=O)[C@H]1C[C@H](C)CCN1C(=O)[C@@H](N)CCCNC(=N)N[N+](=O)[O-]	372.212	-0.41	-6.7	26	1	8	4	7
CHEMBL134550	C[C@@H](O)[C@@H]1[C@H]2SC(=C(N2C1=O)C(=O)O)CN3C[C@@H](CC3C(=O)N)OC(=O)N	400.105	-1.782	-6.6	27	3	6	4	8
CHEMBL1188410	C1CN=C(N\N=C\c2ccc(\C=N\NC3=NCCN3)cc2)N1	298.165	-0.548	-6.1	22	3	4	4	8
CHEMBL14119	CC1CCC(=NNc2ccccc2C(=O)O)C3=NC=C(C(=O)NO)C(=O)N13	371.123	1.232	-7.9	27	3	4	4	8
CHEMBL289782	NC(N)NC(=O)c1nc(I)c(N)nc1N	322.999	-1.824	-6.4	15	1	2	5	7
ZINC000005115297	CN(C)CCNc1ccc(NCCN(C)C)c2c1C(=O)c1c(O)ccc(O)c1C2=O	412.211	1.82	-6.9	30	3	8	4	8
CHEMBL1972226	COc1ccc(\C=N\N=C(/N)\NO)c(OC)c1OC.Cc2ccc(cc2)S(=O)(=O)O	440.137	1.582	-5.4	30	2	6	4	8
CHEMBL3247602	NCCCCCCS[C@@H]1O[C@H](CO)[C@@H](O)[C@H](O)[C@@H]1O	295.145	-0.961	-5.7	19	1	8	5	7
CHEMBL1090580	OC[C@H]1O[C@H]([C@H](O)[C@@H](O)[C@H]1O)n2cc(nn2)c3ccccc3C(F)(F)F	375.104	-0.064	-6.6	26	3	3	4	8
CHEMBL541813	Cl.Cl.Cc1ccc(cc1N2C(=NC(=NC2(C)C)N)N)N3C(=NC(=NC3(C)C)N)N	442.188	1.21	-4.5	29	3	2	4	10
CHEMBL102772	C[S+]([O-])CSC[C@@H](CO)NC(=O)\C=C\c1c(C)nc(O)nc1O	361.077	-0.244	-5.1	23	1	8	4	8
CHEMBL3211705	CCOc1cc(\C=N\NC(=O)C(=O)N\N=C\c2ccc(O)c(OCC)c2)ccc1O	414.154	1.496	-3	30	2	8	4	8
ZINC000064220231	CCO[C@@H](O)CN[C@H](S)N(N)c1ncc(C(F)(F)F)cc1Cl	360.063	1.592	-6.4	22	1	7	4	7
CHEMBL1338604	OCCNc1nc2nonc2nc1NCCO	240.097	-1.179	-5.8	17	2	6	4	9
ZINC000245224557	CN1N=C(O)C(=O)N[C@@H]1SCC1=C(C(=O)O)[C@@H]2C(=O)[C@@H](N)[C@@H]2SC1	372.056	-1.041	-5.8	24	3	4	4	8
CHEMBL1835413	Cl.ONC(=O)CCCCCNC(=O)[C@@H]1CC2(CN1C(=O)[C@@H]3CCCN3)SCCS2	466.148	1.119	-7.3	29	3	8	4	7
CHEMBL1869608	OC(C(O)C(O)C1=NC2C=CC=CC2=N1)C(O)C3=NC4C=CC=CC4=N3	354.133	-0.875	-7.7	26	4	5	4	8
CHEMBL74529	Nc1nc(O)c(N=O)c(NC[C@H]2C[C@@H]2CO)n1	239.102	0.203	-6.1	17	2	5	4	8
CHEMBL1090033	OC[C@H](O)[C@@H](O)[C@@H](O)[C@H](CNC(=O)c1ccccc1)c2ccc3OCOc3c2	389.147	0.004	-7.6	28	3	8	5	7
CHEMBL1893289	Nc1ncnc2c1ncn2[C@@H]3O[C@@H]([C@@H](O)[C@H]3O)C(=O)Nc4cc(cc(c4)C(F)(F)F)C(F)(F)F	492.098	1.704	-6	34	4	3	4	9
ZINC000040747016	O=C1N[C@H]2C(=C[C@H](O)[C@H](O)[C@@H]2O)c2cc3c(c(O)c21)OCO3	307.069	-1.287	-7.6	22	4	0	5	7
ZINC000001710624	NNc1ccc(Br)cc1-c1nc(N)nc(N)n1	295.018	0.751	-6.7	17	2	2	4	7
CHEMBL2373176	N.N.ON(N=O)S(=O)(=O)O	176.022	-0.514	-1.2	10	0	2	4	7
ZINC000016382819	Nc1nnc(/N=[N+](\[O-])c2n[nH]c(N)n2)[nH]1	210.073	-0.987	-6.2	15	2	2	4	8
CHEMBL2163765	Cc1nc(N)nc(N[C@@H]2C[C@@H]([C@@H](O)[C@H]2O)C(C)(C)O)c1c3nc4c(C)nccc4s3	430.179	1.64	-6.2	30	4	4	5	10
CHEMBL2070408	CSC[C@H](CO)N[C@H](CO)c1c[nH]c2c(N)ncnc12	297.126	-0.113	-6	20	2	7	5	7
CHEMBL3339247	OC[C@H]1O[C@@H](Oc2ccc(cc2)C(=O)N\N=C\c3ccc(F)cc3)[C@H](O)[C@@H](O)[C@@H]1O	420.133	-0.232	-6	30	3	6	5	8
ZINC000032597750	O=C(/C=C1\NC(=O)SC1=O)NCCNC(=O)/C=C1\SC(=O)NC1=O	370.004	-1.047	-7.1	24	2	5	4	8
ZINC000001580560	NNc1ccc(-n2ncc(C(N)=O)c2N)nn1	234.098	-1.371	-6.5	17	2	3	4	8
ZINC000019318821	O=[N+]([O-])C(=C1N[C@H](O)[C@@H](O)N1)[N+](=O)[O-]	206.029	-2.504	-5.6	14	1	2	4	8
CHEMBL3596416	OC[C@H]1O[C@H](OCCc2ccc(cc2)[N+](=O)[O-])[C@@H](O)[C@@H](O)[C@@H]1O	329.111	-1.046	-6.7	23	2	6	4	8
CHEMBL445581	Nc1ncnc2c1ncn2C3CC(COS(=O)(=O)N)C(O)C3O	344.09	-2.089	-7.4	23	3	4	4	10
CHEMBL3246743	CNCC(O)COC(=O)c1ccc2OCOc2c1.OC(=O)C(=O)O	343.09	-0.692	-3.3	24	2	5	4	8
ZINC000095641935	C[C@H](N)C(=O)N[C@@]1(C(=O)O)C[C@@H](Sc2nnc[nH]2)[C@H]2[C@H](C(=O)O)[C@H]21	355.095	-1.097	-5.9	24	3	6	5	7
CHEMBL1965337	CCCCc1c(OC)cc(O)c2C(=O)C3=C(NC(=C(O)C3=O)C(=O)O)C(=O)c12	387.095	1.611	-6.9	28	3	5	4	7
ZINC000100133150	NS(=O)(=O)c1ccc(/N=N\c2nc3c(nc(O)nc3O)[nH]2)cc1	335.044	0.827	-7.7	23	3	3	4	9
ZINC000071773532	CC(C)(c1ccc(O)cc1)c1ccc(O[C@@H]2O[C@H](C(=O)O)[C@@H](O)[C@H](O)[C@H]2O)cc1	404.147	0.989	-6.4	29	3	5	5	7
CHEMBL1688326	CN1C(=O)[C@H]2C[C@@]3(CN2C(=O)c4cc(N)ccc14)O[C@H](CO)[C@@H](O)[C@@H]3O	363.143	-1.689	-6.7	26	4	1	4	7
CHEMBL3339254	OC[C@H]1O[C@@H](Oc2ccc(cc2)C(=O)N\N=C\c3ccc(cc3)[N+](=O)[O-])[C@H](O)[C@@H](O)[C@@H]1O	447.128	-0.463	-4.1	32	3	7	5	10
ZINC000104041099	O=C(O)c1nc(/N=N\c2ccc(S(=O)(=O)O)cc2)[nH]c1C(=O)O	340.011	1.468	-6.9	23	2	5	4	7
CHEMBL1990165	N.NS(=O)(=O)c1nc(c2[nH]cnc2n1)S(=O)(=O)O	296	-1.591	-1.2	18	2	2	4	8
CHEMBL591954	CCCc1nnc(Cc2cccc(c2)[C@@H]3O[C@H](CO)[C@@H](O)[C@H](O)[C@H]3O)s1	380.141	0.596	-7	26	3	6	4	8
CHEMBL2074703	OS(=O)(=O)CC(S)CSSCC(S)S(=O)(=O)O	359.896	0.698	-5.1	17	0	8	4	8
CHEMBL3278670	CC1(C)Nc2nc(N)nc(O)c2N=C1CO	223.107	0.033	-6.1	16	2	1	4	7
ZINC000009316030	Oc1ncnc(O)c1C(c1cccs1)c1c(O)ncnc1O	318.042	1.331	-7.5	22	3	3	4	9
CHEMBL4099596	Nc1nc(Nc2ccc(cc2)S(=O)(=O)N)c3c(c[nH]c3n1)C#N	329.069	0.803	-7.2	23	3	3	4	7
ZINC000004411153	O=C1c2ccccc2C(=O)C2=C1[C@H]1C=CC=N[C@@H]1[C@](O)(S(=O)(=O)O)[C@@]2(O)S(=O)(=O)O	454.998	-0.846	-5.2	30	4	2	4	9
CHEMBL1797675	CN(C)c1ccc(\C=C\C(=O)C[C@@H]2O[C@H](CO)[C@H](O)[C@H](O)[C@H]2O)cc1	351.168	-0.433	-6.8	25	2	6	4	7
CHEMBL2047187	COC1=CC(=O)c2cc3[C@H](O)[C@@H](O)[C@@](C)(O)Cc3c(O)c2C1=O	320.09	0.003	-6.8	23	3	1	4	7
CHEMBL1852410	ONC(=O)CCCCCNC(=O)[C@@H]1CC2(CN1C(=O)[C@@H]3CCCN3)SCCS2	430.171	0.698	-7.1	28	3	8	4	7
ZINC000253615126	NS(=O)(=O)c1ccc(N[C@@H]2O[C@H](CO)[C@H](O)[C@@H]2O)cc1	304.073	-1.815	-6.4	20	2	4	5	7
ZINC000004795487	Cc1c/c(=N/N2C(=N)CSC2=S)nc(N[C@@H](O)C(Cl)(Cl)Cl)[nH]1	399.95	1.945	-6.8	22	2	3	4	7
CHEMBL151587	C[C@H](O)[C@H]1O[C@@H](Oc2ccc(\C=C(/C)\C(=O)N3CCNCC3)cc2O)[C@@H](O)[C@@H]1O	408.19	-0.566	-5.5	29	3	5	5	8
CHEMBL1160158	CCN1C2CCC1CC(C2)OC(=O)C(CO)c3ccccc3.OC(C(O)C(=O)O)C(=O)O	453.2	0.198	-4.5	32	3	8	5	8
CHEMBL3211188	Cc1cc(Cl)ccc1OCC(=O)N\N=C\c2ccc(OC3OC(CO)C(O)C(O)C3O)cc2	480.13	0.356	-7.5	33	3	8	5	9
CHEMBL3924091	Brc1ncc(CNc2nc(NC3CC3)n4ncc(\C=C\5/NC(=O)NC5=O)c4n2)s1	475.017	1.71	-7.5	29	5	6	4	10
CHEMBL166	Nc1nc(N)nc(Nc2ccc(cc2)[As]3SCC(CO)S3)n1	397.996	0.316		22	3	4	4	9
CHEMBL1999287	CC1=C(C#N)C(=S)N(C2OCC(O)C(O)C2O)C(=C1C#N)N	322.074	-0.537	-6.2	22	2	1	4	9
CHEMBL41738	Nc1ncnc2c1ncn2NC(=O)COCP(=O)(O)O	302.053	-1.37	-5.9	20	2	5	4	8
ZINC000009244058	Cn1c2nc(NN=C3C(=O)NC(=O)NC3=O)n(Cc3cccc4ccccc43)c2c(=O)[nH]c1=O	460.124	-0.241	-8.2	34	5	4	4	10
ZINC000247793372	O[C@@H]1O[C@H]2O[C@H](O)[C@@H](O)O[C@H]2O[C@@H]1O	210.038	-2.994	-5.7	14	2	0	4	8
ZINC000248376605	CC(=O)c1ccc(N[C@@H]2O[C@H](O)[C@H](O)[C@H](O)[C@H]2O)cc1	283.106	-0.942	-6.7	20	2	3	5	7
ZINC000575420279	O=S1(=O)C=C[C@H](NC(=S)Nc2nc3[nH]cnc3c(O)n2)C1	326.026	-0.344	-6.7	21	3	2	4	7
ZINC000408518140	CC(C)(C)OC(=O)NCCC(=O)Nn1c(O)nnc1O	287.123	-0.326	-6.6	20	1	4	4	8
CHEMBL1992876	CC(=O)NNc1nc(C)c(s1)C(=O)NNC(=O)C(=O)Nc2c(Cl)cc(cc2Cl)[N+](=O)[O-]	489.003	1.529	-4.4	31	2	5	5	9
CHEMBL2219771	CCCOC1OC(CS(=O)(=O)O)C(O)C(O)C1O	286.072	-1.892	-6.2	18	1	5	4	7
CHEMBL288662	COc1ccc(\C=C(/C)\C(=O)N[C@@H]2[C@H](O)[C@@H](O)[C@H]3OCO[C@H]3[C@@H]2O)cc1F	383.138	-0.44	-7.6	27	3	4	4	7
CHEMBL3544538	O[C@H]1C(Oc2ccc(cc2)C(c3ccc(O)cc3)c4ccccn4)O[C@@H]([C@@H](O)[C@@H]1O)C(=O)O	453.142	1.238	-5.6	33	4	6	5	8
ZINC000000371296	Nc1nc(-c2cccc(-c3n[nH]c(N)n3)n2)n[nH]1	243.098	-0.184	-6.8	18	3	2	4	7
CHEMBL1976265	OCC1OC(C(O)C(F)C1O)N2N=CC(=O)NC2=O	277.071	-3.119	-6.5	19	2	2	4	8
CHEMBL568038	C[C@H](NC(=O)N1CCOCC1)C(=O)N[C@@H](C)C(=O)NN(CC(=O)N)C(=O)OCc2ccccc2	478.218	-0.923	-6.3	34	2	8	4	7
CHEMBL2111897	COC(OC)[C@@]1(C)Oc2ccc(N)cc2[C@H](\N=C(\NCc3ccccc3)/NC#N)[C@H]1O	425.206	1.657	-6	31	3	6	4	7
ZINC000003840043	COc1cc(SC)ccc1C(=O)N[C@@H]1C=C(C(=O)N[C@H](C)C(N)=O)C[C@@H](O)[C@@H]1O	423.146	-0.443	-6.5	29	2	7	5	7
CHEMBL293733	C[C@@H](COc1cc(N)nc(N)n1)OCP(=O)(O)O	278.078	-0.44	-5.9	18	1	6	4	7
CHEMBL2013178	N\C(=N/O)\c1nc(Cl)c(NCC(=O)OCc2ccccc2)nc1N	350.089	0.962	-7.1	24	2	6	4	8
CHEMBL2047186	CO[C@@H]1[C@H]2C[C@](C)(O)[C@H](O)C[C@H]2C(=O)c3c(O)cc(OC)c(O)c13	338.137	1.128	-6.4	24	3	2	4	7
CHEMBL1669325	CN(C)C(=S)S[C@@H]1O[C@H](CO)[C@@H](O)[C@H](O)[C@H]1N	282.071	-1.668	-5.3	17	1	2	4	7
CHEMBL2179471	CC[C@H]1OC(=O)[C@H](C)[C@@H](O)[C@H](C)[C@@H](O)[C@](C)(O)C[C@@H](C)CN(C)[C@H](C)[C@@H](O)[C@]1(C)O	433.304	0.525	-4.5	30	1	1	5	8
ZINC000018113771	NC(=O)c1nc(/N=N/c2ccc(S(N)(=O)=O)cc2)[nH]c1N	309.064	0.154	-6.5	21	2	4	4	7
ZINC000071404965	C=C1C[C@@H](C)O[C@H]2O[C@H]3[C@H](O[C@@]12O)[C@@H](NC)[C@@H](O)[C@@H](NC)[C@@H]3O	330.179	-1.938		23	3	2	5	8
ZINC000004561984	C=CCNC(=S)NNc1nc(Nc2ccccc2)nc(N2CCOCC2)n1	386.164	1.429	-7.5	27	3	7	4	8
ZINC000004487887	COc1cc([C@@H]2c3c(=O)[nH]c(=O)[nH]c3NC3=C2C(=O)CC(C)(C)C3)cc(OC)c1O	413.159	1.987	-6.1	30	4	3	4	7
CHEMBL3221803	O[C@@H]1C[C@@](O)(C=C([C@H]1O)c2cn(nn2)c3cccnc3)C(=O)O	318.096	-1.013	-6.9	23	3	3	4	8
ZINC000006225697	O=C1NC(=O)N(c2ccc(Br)cc2)C(=O)/C1=C\NC(CO)(CO)CO	413.022	-0.779	-6.9	25	2	6	5	7
CHEMBL244307	C[C@@H](O)C1C2[C@@H](C)C(=C(C2C1=O)C(=O)O)S[C@@H]3CN[C@H](CN4CC(C)NS4(=O)=O)C3	459.15	-0.211	-5.4	30	4	6	4	7
CHEMBL3144035	CCOP(=O)(O)OC[C@H]1O[C@H]([C@H](O)[C@@H]1O)C2=NNC(C(=O)N)C2=O	367.078	-2.989	-6.5	24	2	7	5	10
CHEMBL3273013	C[C@H](NC(=O)C)C(=O)N[C@@H](C)C(=O)N1CCC[C@H]1C(=O)NN(C)C(=O)O[C@@H](C)C(=O)NN	457.228	-2.515	-7.2	32	1	7	5	8
ZINC000008694848	CS(=O)(=O)N1NC(=N)/C(=N/Nc2ccc(C(=O)O)cc2)C1=N	324.064	-0.113	-6.8	22	2	4	5	7
CHEMBL4077013	Clc1nc(NNC(=O)c2ccncc2)nc(NNC(=O)c3ccncc3)n1	385.08	0.829	-7.9	27	3	6	4	9
ZINC000025758739	OC[C@H]1O[C@@H](On2ccc3ccc(Cl)cc32)[C@H](O)[C@@H](O)[C@H]1O	329.067	-0.477	-7	22	3	3	4	7
CHEMBL607774	CCCCCOC(=O)NC1=NC(=O)N(C=C1F)C2O[C@@H]([C@@H](O)[C@H]2O)C(=O)O	389.123	-0.175	-7.5	27	2	7	4	9
CHEMBL327578	ONC(=O)[C@H]1[C@@H](O)[C@H](O)[C@@H](O)CN1S(=O)(=O)c2ccc(OC3CCCCC3)cc2	430.141	-0.641	-5.8	29	3	5	5	8
ZINC000030293218	CCNc1nc(NCC)nc(N/N=C\c2ccc(O)c(OC)c2)n1	331.176	1.895	-6.5	24	2	8	4	9
ZINC000002828989	Nc1cc(N)nc(SCCCCSc2nc(N)cc(N)n2)n1	338.11	1.26	-6.2	22	2	7	4	10
CHEMBL420453	CNCC1CNc2nc(N)nc(O)c2N1	210.123	-0.81	-5.9	15	2	2	5	7
ZINC000008683253	CCOC(=O)[C@@H]1[C@@H](c2cc(OC)c(O)c(OC)c2)NC(=S)N[C@]1(O)C(F)(F)F	424.092	1.358	-6.8	28	2	5	4	7
ZINC000104309836	C(/C=N\NC1=NCCCCN1)=N/NC1=NCCCCN1	278.197	-0.384	-6.4	20	2	3	4	8
CHEMBL3647363	CCNC1=N[C@@H]2[C@@H](O)[C@H](O)[C@H](O[C@@H]2S1)[C@@H](O)CC=C	288.114	-0.549	-6.3	19	2	4	4	7
ZINC000003924950	N#Cc1c(CC(=O)O)c(C(=O)O)sc1N(CC(=O)O)CC(=O)O	342.016	-0.079	-6.5	23	1	8	4	7
CHEMBL3943219	CC[C@H](C)[C@@H]1NC(=O)[C@@H](C)NC(=O)[C@@H](NC(=O)[C@H]2CSSC[C@@H](NC1=O)C(=O)N2)C(C)C	487.192	-0.459	-0.4	32	2	3	5	7
CHEMBL1709360	COC(=O)[C@@H]1C[C@@]2(O)[C@H](O)[C@H](O)[C@H](O)C[C@H]2N1Cc3ccc(C)s3	357.125	-0.61	-6.8	24	3	3	4	8
CHEMBL250656	Nc1cccc2c1ncn2[C@@H]3O[C@H](CSCCC(=O)O)[C@@H](O)[C@H]3O	353.105	0.446	-6.6	24	3	6	4	8
ZINC001554503204	O=C(O)c1ccc(-n2nc(O)c3cc4c(O)nn(-c5ccc(C(=O)O)cc5)c(=O)c4cc3c2=O)cc1	486.081	1.892	-1.8	36	5	4	4	10
ZINC000095117211	NNS(=O)(=O)c1ccc2c(c1)oc(=O)c1cc(S(=O)(=O)NN)ccc21	384.02	-0.75	-6.6	25	3	4	4	8
ZINC000077285380	NC(=O)OC[C@H](O[C@@H]1O[C@H](C(=O)O)[C@@H](O)[C@H](O)[C@H]1O)c1ccccc1Cl	391.067	-0.615	-7.2	26	2	6	5	8
CHEMBL1995164	CC(=O)c1cccc(NC(=O)C(=O)Nn2c(N)nnc2N)c1	303.108	-0.646	-6.4	22	2	3	4	8
ZINC000008254657	COCCNC(=O)[C@H]1C[C@@H](O)[C@H](O)[C@@H]2N=C(Nc3ccc(C)cc3)S[C@@H]21	379.157	0.751	-6.9	26	3	5	4	7
ZINC000003032823	O=C(O)/C=C/C(=O)Nc1ncnc(NC(=O)/C=C/C(=O)O)n1	307.055	-0.97	-6.3	22	1	6	4	7
CHEMBL604444	CCOC(=N)c1ncn(n1)C2O[C@H](CO)[C@@H](O)[C@H]2O	272.112	-1.749	-6.4	19	2	4	4	9
CHEMBL1159549	CS(=O)(=O)C[C@H]1OC(O)[C@H](O)[C@@H](O)[C@H]1O	242.046	-3.169	-5.4	15	1	2	4	7
ZINC000100254250	CN(C)c1ccc(/C=N/[C@H]2[C@H](O)O[C@H](CO)[C@@H](O)[C@@H]2O)cc1	310.153	-1.029	-6.1	22	2	4	4	7
CHEMBL219798	N[C@@H]1C[C@H](N)CN(C1)c2nc(N)nc(n2)N3C[C@H](N)C[C@H](N)C3	322.234	-2.817	-7.2	23	3	2	5	10
CHEMBL1195607	CCSCC1NC(C(O)C1O)c2c[nH]c3c(N)ncnc23	309.126	0.028	-6.5	21	3	4	5	7
ZINC000005544397	O=C1NC(=S)NC(=O)C1=CNNc1ccc([N+](=O)[O-])cc1[N+](=O)[O-]	352.023	-0.166	-6.7	24	2	5	4	9
ZINC000001716545	CCOC(=O)c1ccc(NCc2nc3c(nc(N)nc3N)[nH]2)cc1	327.144	1.306	-7.4	24	3	5	4	8
ZINC000585119900	Cc1nc2cc(NC(=O)Nc3nccs3)ccc2n1C(CO)CO	347.105	1.971	-5.9	24	3	5	4	7
CHEMBL4087352	Cc1cnc(nc1)c2ccc(cc2)C(=O)N[C@H](C(=O)NO)C(C)(C)NS(=O)(=O)C	421.142	0.384	-7.5	29	2	7	4	7
CHEMBL2070404	CSC[C@@H](C[NH2+]Cc1c[nH]c2c(N)ncnc12)[C@@H](O)CO.[O-]C(=O)C(F)(F)F	425.134	-1.765	-3.8	28	2	8	5	8
CHEMBL293851	COC12[C@@H](COC(=O)N)C3=C(N1C[C@H]4N[C@@H]24)C(=C(C)\C(=N/CCO)\C3=O)O	378.154	-1.188	-5.9	27	4	5	4	9
CHEMBL3249116	O=C1c2ccccc2C(=O)c3c(NCCN4CCNCC4)ccc(NCCN5CCNCC5)c13	462.274	1.096	-7.3	34	5	8	4	8
CHEMBL195147	NS(=O)(=O)c1ccc(NS(=O)(=O)c2ccc(N\C(=N\N3CCOCC3)\S)cc2)cc1	471.07	1.08	-7.1	30	3	6	4	7
CHEMBL3237967	CC(C)(C)c1ccc(cc1)c2n[nH]c(n2)[C@@H]3O[C@H](CO)[C@@H](O)[C@H](O)[C@H]3O	363.179	0.284	-5.4	26	3	3	5	7
CHEMBL2219752	CC(C)(C)NC(=O)OCCCc1c[nH]cn1.O\C=C(/O)\C(=O)C=O	341.159	1.579	-4	24	1	6	4	7
CHEMBL489713	CCCC(=O)O[C@@H]1[C@@H](O)[C@@H](O)[C@H](O)[C@H](O)[C@H]1OC	264.121	-1.829	-6	18	1	4	4	7
ZINC000016384557	O=C(O)c1ccc(NC=C2C(=O)NC(=O)NC2=O)c([N+](=O)[O-])c1	320.039	-0.045	-6.9	23	2	4	4	7
CHEMBL136759	Nc1nc(CC2O[C@H](CSc3ccccc3)[C@@H](O)[C@H]2O)nc(NC4Cc5ccccc5C4)n1	465.183	1.857	-8.1	33	5	7	4	9
ZINC000008651865	NC(=O)C1=C(O)C[C@H]2C[C@@H]3Cc4cccc(O)c4C(=O)C3=C(O)[C@@]2(O)C1=O	371.101	0.58	-6.3	27	4	1	5	7
CHEMBL3685570	Cn1ncc(NC(=O)c2nc(cnc2Nc3cncnc3)C4CC4)c1C(=O)NC(C)(C)CO	451.208	1.374	-6.2	33	4	8	4	10
CHEMBL3988776	Cn1ncc2c(NCCO)nc(NCCO)nc12	252.133	-0.828	-6.2	18	2	6	4	8
ZINC000005081280	C[C@H]1O[C@@H](n2cnc3c2nc[nH]c3=S)[C@@H](O)[C@@H](O)[C@H]1O	298.074	-0.511	-7.2	20	3	1	4	8
CHEMBL1162949	Nc1nc(N)c(c2ccccc2)c(n1)[C@H](O)[C@H](O)CO	276.122	-0.305	-6.8	20	2	4	5	7
CHEMBL55245	OCCOC(N1C=C(F)C(=O)NC1=O)C(=O)NO	263.055	-2.311	-6.6	18	1	5	4	7
CHEMBL3989674	CN1CC(O)C2=C\C(=N\NC(=N)N)\C(=O)C=C12.CS(=O)(=O)O	331.095	-1.971	-8.1	22	2	1	5	7
ZINC000010715964	Nc1nc(SCC(=O)NN2C(=O)NC3(CCCCC3)C2=O)n[nH]1	339.111	-0.235	-6.3	23	3	4	4	7
CHEMBL1392460	NC1=C(C#N)C2(C(=O)Nc3ccccc23)c4c(O)nc(S)nc4O1	339.043	0.795	-4.2	24	4	0	4	8
CHEMBL1974933	CC(=O)NNc1nc(C)c(s1)C(=O)NNC(=O)C(=O)Nc2ccc(C)cc2[N+](=O)[O-]	435.096	0.531	-6.7	30	2	5	5	9
CHEMBL3764497	OCc1c(O)c(ncc1CS(=O)(=O)Cc2ccc(F)cc2)C(=O)NO	370.063	0.653	-7.5	25	2	6	4	7
ZINC000016681968	CCOC(=O)/C(C(=O)Nc1ccccc1)=C(\N)NNc1ccccc1[N+](=O)[O-]	385.139	1.883	-7.7	28	2	8	4	8
ZINC000263586245	CC(=O)c1c2c(c(O)c(C)c1O)[C@]1(C)C(=CC(=O)/C(=C(/C)N[C@@H](C)C(N)=O)C1=O)O2	414.143	1.032	-7	30	3	4	4	8
ZINC000253433319	Cc1[nH]nc(C(=O)NC[C@H](NC(=O)c2n[nH]c(C)c2[N+](=O)[O-])c2ccccc2)c1[N+](=O)[O-]	442.135	1.467	-7.6	32	3	8	4	8
CHEMBL3930168	C[C@H](Nc1nc(NC2CC2)n3ncc(\C=C\4/NC(=O)NC4=O)c3n1)C5CC5	368.171	1.089	-8.3	27	5	6	4	8
ZINC000065464167	CCN(CC)c1cc(NC[C@H](O)CO)nc(N)n1	255.17	-0.33	-5.6	18	1	7	4	7
CHEMBL27814	CN(Cc1cnc2nc(N)nc(N)c2n1)c3ccc(cc3)C(=O)NCCCS(=O)(=O)O	446.148	0.228	-6.5	31	3	8	4	10
CHEMBL4065776	CCC(CO)Nc1nc(Cl)nc(NNC(=O)c2ccncc2)n1	337.105	0.86	-6.9	23	2	7	4	8
CHEMBL551452	OC[C@H]1O[C@@H](S\C(=N/O)\c2ccc(cc2)c3ccccc3)[C@H](O)[C@@H](O)[C@@H]1O	391.109	1.022	-7.8	27	3	4	5	8
ZINC000009944295	Cc1ncc(COP(=O)(O)O)c(/C=N/NC(=S)NCc2ccco2)c1O	400.061	1.296	-6.6	26	2	7	5	7
CHEMBL1966988	NC(=N)NS(=O)(=O)c1ccc(N\N=C/2\CCOC2=O)cc1	311.069	-0.427	-7.7	21	2	4	4	7
CHEMBL255672	C[C@@H]1CC(=O)C2=C(C[C@@H](O)[C@@]3(O)[C@@H](O)c4c(O)cccc4C(=O)[C@@H]23)[C@H]1O	360.121	0	-7.1	26	4	0	5	7
CHEMBL1375097	OC(=O)CNS(=O)(=O)c1ccc2nc(O)c(O)nc2c1	299.021	-0.596	-7	20	2	4	4	7
ZINC000409414422	CC(=O)c1c2c(c(O)c(C)c1O)[C@@]1(C)C(=CC(=O)/C(=C(/C)NCc3nc(N)n[nH]3)C1=O)O2	439.149	1.059	-5.9	32	4	4	5	10
ZINC000005812405	CSCC[C@H](C(=O)O)N(C[C@@]1(O)OC[C@@H](O)[C@@H](O)[C@H]1O)N=O	340.094	-2.022	-6.3	22	1	8	5	9
CHEMBL1208089	Nc1ccc(Nc2cc(c(N)c3C(=O)c4ccccc4C(=O)c23)S(=O)(=O)O)cc1S(=O)(=O)O	489.03	1.863	-6.8	33	4	4	5	9
CHEMBL3647360	CNC1=N[C@@H]2[C@@H](O)[C@H](O)[C@H](O[C@@H]2S1)[C@H](C)O	248.083	-1.495	-6.1	16	2	1	4	7
CHEMBL3655934	OCc1cccc(CO)c1CNc2ncc(cn2)C(=O)NO	304.117	0.192	-6.9	22	2	6	5	7
CHEMBL1213739	OC[C@H]1O[C@H]([C@H](O)[C@@H](O)[C@@H]1O)c2ncc(Cc3ccc(Cl)cc3)s2	371.059	0.902	-6.3	24	3	4	4	7
ZINC000005437757	CCS(=O)(=O)C([C@H](O)[C@H](O)[C@H](O)[C@@H](C)O)S(=O)(=O)CC	334.076	-2.355	-5.9	20	0	8	4	8
CHEMBL1338950	Nc1ncnc2c(nsc12)[C@@H]3O[C@@H](CO)[C@H](O)[C@@H]3O	284.058	-1.178	-6.3	19	3	2	4	9
ZINC000263585264	CNC(=O)[C@H](C)N/C(C)=C1\C(=O)C=C2Oc3c(c(O)c(C)c(O)c3C(C)=O)[C@@]2(C)C1=O	428.158	1.293	-6.6	31	3	4	4	8
CHEMBL610851	CCNC(=O)[C@H]1OC([C@H](O)[C@]1(C)O)n2cnc3c(N)ncnc23	322.139	-1.446	-6.4	23	3	3	4	9
CHEMBL1410748	CN1CCN(CC1)c2ccc3ccccc3n2.OC(=O)\C=C/C(=O)O.OC(=O)\C=C/C(=O)O	459.164	1.41	-4.2	33	3	5	4	7
ZINC000072433567	Nc1nc(CNc2nc(N)nc3c2CCNCC3)cs1	291.127	0.398	-6.4	20	3	3	4	8
ZINC000001590129	CCOC(=O)N[C@@H](c1ccccc1[N+](=O)[O-])[P@](=O)(O)Nc1ncn[nH]1	370.079	1.755	-7.5	25	2	7	4	7
CHEMBL4099627	NCCNc1nonc1\C(=N\O)\Nc2ccc(F)c(Br)c2	358.019	1.59	-6.1	21	2	5	4	7
ZINC000016213515	COc1ccc(C(c2c(O)nc(SC)[nH]c2=O)c2c(O)nc(SC)[nH]c2=O)cc1OC	464.082	1.906	-6.8	31	3	7	4	10
CHEMBL208782	CO\C(=N\C[C@H]1CN(C(=O)O1)c2ccc(N3CCN(CC(=N)NO)CC3)c(F)c2)\S	440.164	1.161	-7.4	30	3	6	4	8
ZINC000064033468	CC(=O)[C@@H](O)[C@H]1O[C@@H](n2cnc3c2ncnc3N)[C@@]2(O)C(C)(C)[C@@]12O	349.139	-1.242	-6.4	25	4	3	4	10
ZINC000002222393	N#Cc1cc(C(=O)O)c(=O)[nH]c1SCSc1[nH]c(=O)c(C(=O)O)cc1C#N	403.989	1.045	-6.4	27	2	6	4	8
CHEMBL343915	C[C@H](O)[C@H](C)[C@@H]1O[C@H]1C[C@H]2CO[C@@H](C\C(=C\c3oc(CO)cn3)\C)[C@H](O)[C@@H]2O	397.21	0.871	-7.5	28	3	8	4	8
ZINC000001556782	NC(=O)c1nc2c(nc(N)nc2Nc2ccc(Cl)cc2)nc1N	330.074	1.08	-7.5	23	3	3	4	8
CHEMBL3230009	CC(=O)NCc1cccc(N\C(=C\2/C(=O)OC(=O)C(=C2O)C(=O)C)\O)c1	360.096	0.989	-6.5	26	2	5	4	8
ZINC000002028996	CC1(C)CC(=O)C(=CC(=C(NCCO)NCCO)[N+](=O)[O-])C(=O)C1	341.159	-0.519	-6.6	24	1	8	4	8
ZINC000104297092	CC(=O)c1cccc(NC(=O)/C(=N/NC(=S)NN)[C@H]2C(=O)Nc3ccccc3[S@@]2=O)c1	458.083	0.65	-6.2	31	3	5	5	7
CHEMBL4072733	OCCNc1nonc1\C(=N\O)\Nc2ccc(F)c(Br)c2	359.003	1.623	-6.7	21	2	5	4	7
CHEMBL3781004	O.CCOc1ccc(Cc2cc([C@@H]3S[C@H](CO)[C@@H](O)[C@H](O)[C@H]3O)c(OC)cc2C)cc1	452.187	1.4	-1.5	31	3	7	4	7
ZINC000253623831	COC(=O)c1cnc(O)c([C@@H](CC(N)=O)c2ccc(O)c(Cl)c2)c1O	366.062	1.646	-6.7	25	2	5	4	7
CHEMBL93393	CC1(C)CC[C@H](O)[C@@]2(C)[C@H]1[C@H](O)[C@H](OC(=O)NCC=C)[C@@]3(C)O[C@](C)(CC(=O)[C@]23O)C=C	451.257	1.869	-4.9	32	3	4	4	7
CHEMBL1794940	CC1OC2(CCN(C)CC2)C3OCCOC13.OC(=O)\C=C/C(=O)O.OC(=O)C(=O)O	433.158	-0.479	-3.3	30	3	2	4	8
CHEMBL50631	C[C@@H](O)[C@@H]1C2[C@@H](C)C(=C(N2C1=O)C(=O)O)S[C@H]3[C@@H](CN)O[C@@H]3CO	358.12	-1.04	-6.2	24	3	6	4	7
CHEMBL3249831	CC1=CN([C@H]2C[C@H](O)[C@@H](CNS(=O)(=O)O)O2)C(=O)NC1=O	321.063	-2.114	-7.1	21	2	4	4	7
ZINC000095930871	O=c1n(CO)c(O)c(O)n1CO	176.043	-2.039	-4.9	12	1	2	4	7
CHEMBL3897125	C[C@]1(CS(=O)(=O)C2(CNC2)C(=N)N1)c3cc(NC(=O)c4ccc(cn4)C#N)ccc3F	442.122	0.897	-6.8	31	4	3	4	7
ZINC001570001716	C[C@H]1O[C@@](O)(O[n+]2cccc([C@@H]3C[C@@H](O)C(=O)N3C)c2)[C@H](O)[C@@H](O)[C@@H]1O	371.145	-3.186	-6.9	26	3	3	5	8
CHEMBL611256	CCCC\C=C/c1nc(N)c2ncn(C3O[C@@H]([C@@H](O)[C@H]3O)C(=O)NCC)c2n1	390.202	0.367	-6.3	28	3	7	4	9
CHEMBL1794941	CC1OC2(CCN(C)CC2)C3SCCSC13.OC(=O)\C=C/C(=O)O.OC(=O)C(=O)O	465.113	0.954	-3.3	30	3	2	4	8
CHEMBL3327157	COc1cccc(c1)c2cnc3ncnc(NCC(P(=O)(O)O)P(=O)(O)O)c3c2	440.065	1.794	-7.4	29	3	7	5	7
ZINC000040386991	COc1ccc(S(=O)(=O)N=C2NCN(C(C)(CO)CO)CN2)cc1OC	388.142	-1.098	-6.2	26	2	7	4	7
CHEMBL1902900	CC(Sc1nc(N)cc(N)n1)C(=O)NNC(=O)c2ccc(C)cc2	346.121	0.891	-7.7	24	2	4	4	7
ZINC000102754522	O=C(O)CN1C(=O)N[C@@H]2O[C@@H]([C@@H]3O[C@H]4NC(=O)N(CC(=O)O)[C@@H]4O3)O[C@H]21	374.071	-2.744	-6.4	26	4	5	4	8
CHEMBL4059528	OC[C@H]1O[C@H](Oc2ccc(cc2Cl)c3ccc(cc3)[N+](=O)[O-])[C@@H](O)[C@@H](O)[C@@H]1O	411.072	1.094	-7.1	28	3	5	4	8
ZINC000016383433	O=C1NC(=S)N=C(O)/C1=C/NNc1cc([N+](=O)[O-])cc([N+](=O)[O-])c1	352.023	0.675	-7.2	24	2	5	4	8
CHEMBL488258	NS(=O)(=O)c1ccc(cc1)\N=N\c2nc3nc(O)nc(O)c3[nH]2	335.044	0.827	-6.6	23	3	3	4	9
ZINC000408541063	Cc1cc(O)nc(SCC(=O)Nc2ccc3nc(O)[nH]c3c2)n1	331.074	1.803	-7.4	23	3	4	4	7
CHEMBL3237968	OC[C@H]1O[C@H]([C@H](O)[C@@H](O)[C@@H]1O)c2nc(n[nH]2)c3ccc(cc3)C(F)(F)F	375.104	0.005	-7.8	26	3	3	5	7
CHEMBL1079828	CS[C@@]12C[C@@H]3[C@@H]([C@@H](O)[C@@H](O)CC3=O)N1C(=O)[C@@]4(C[C@@H]5[C@@H]([C@@H](O)[C@@H](O)CC5=O)N4C2=O)SC	486.113	-2.058	-2.4	32	5	2	4	10
ZINC000006680170	C[C@@H]1CCc2c(sc(NC(=O)CSc3n[nH]c(N)n3)c2C(N)=O)C1	366.093	1.403	-6.8	24	3	5	4	7
CHEMBL3897403	O=C1NC(=O)\C(=C\c2cnn3c(NC4CC4)cc(Nc5ccc(cn5)n6ccnc6)nc23)\N1	442.161	1.808	-7.5	33	6	6	4	10
ZINC000301054456	CC(=NN1CN([C@@H](C)C(=O)O)P(Nc2ncn[nH]2)NC1=N)c1cccs1	395.104	1.502	-6.3	26	3	6	5	8
CHEMBL3703933	CN(C)Cc1ccc(Cc2cc([C@@H]3O[C@H](CO)[C@@H](O)[C@H](O)[C@H]3O)c4CCOc4c2Cl)cc1	463.176	1.442	-7.4	32	4	6	4	7
ZINC000071769469	C=C1c2cccc(O)c2C(=O)[C@]2(F)C(=O)[C@]3(O)C(=O)C(C(N)=O)=C(O)[C@@H](N(C)C)[C@@H]3[C@@H](O)[C@H]12	460.128	-0.973	-5.5	33	4	2	5	9
CHEMBL1784416	OCCOc1cc(Cl)c(Cc2ncc(s2)c3occc3)cc1[C@@H]4O[C@H](CO)[C@@H](O)[C@H](O)[C@H]4O	497.091	1.533	-7.6	33	4	8	5	10
ZINC000408726365	CCNC(=S)NNc1nc(=Nc2ccccc2)nc(N2CCOCC2)[nH]1	374.164	0.685	-5.6	26	3	5	4	7
ZINC000071773625	C[C@@H](O)[C@H](N)C(=O)N1CCC[C@H]1C(=O)N1CCC[C@H]1C(=O)N[C@H](C(N)=O)[C@@H](C)O	413.227	-2.973	-7.6	29	2	7	5	7
CHEMBL1969591	NNC(=O)C(=O)N\N=C\1/CCC(=O)CC1C(=O)CCC(=O)Nc2ccc(Cl)cc2	421.115	0.459	-6.6	29	2	6	4	7
CHEMBL2159238	CO[C@@H]1[C@@H](O)[C@@H](O)[C@H](Oc2ccc(CCNC(=O)C)c(c2)c3ccc(O)cc3)OC1(C)C	445.21	1.988	-5.5	32	3	7	4	7
ZINC000019170545	O=S1(=O)C[C@H](O)[C@H](NN[C@H]2CS(=O)(=O)C[C@H]2O)C1	300.045	-3.604	-6	18	2	3	4	8
ZINC000077291202	C[S@@](=O)CCCC/C(=N/O)S[C@@H]1O[C@@H](CO)[C@@H](O)[C@H](O)[C@H]1O	357.092	-1.144	-6.6	22	1	7	5	9
CHEMBL526843	CO[C@@H]1CC[C@](C)(O)C(=C1O)C(=O)C2(C)NC(=O)CC[C@H](N)C(=O)O2	356.158	-0.576	-6.5	25	2	3	4	8
CHEMBL3911001	C[C@H](NC(=O)c1cc(nc(n1)c2ccc(Oc3ccc(F)cc3)cc2)[C@H](O)CO)C(=O)N	440.15	1.704		32	3	8	4	7
CHEMBL3306997	Cc1c([nH]c2ccc(OS(=O)(=O)O)cc12)c3ccc(OS(=O)(=O)O)c(OS(=O)(=O)O)c3	494.96	1.688	-6.3	31	3	7	4	9
CHEMBL1812997	CCCC(=O)OC[C@H]1O[C@@H](Oc2cc(O)cc(\C=C\c3ccc(O)cc3)c2)[C@H](O)[C@@H](O)[C@@H]1O	460.173	1.798	-6.6	33	3	8	5	9
CHEMBL1977711	CCC1=C(C)N(C2OC(CO)C(O)C(O)C2O)C(=S)C(=C1C)C#N	354.125	0.241	-5.9	24	2	3	4	8
CHEMBL3914312	NS(=O)(=O)NCCNc1nonc1\C(=N\O)\NCc2occ(Br)c2	422.996	-0.444	-6.3	24	2	8	5	9
CHEMBL3142796	CC1=CN(CC[C@H]2C[C@H](O)[C@@H](COP(=O)(O)O)O2)C(=O)NC1=O	350.088	-1.137	-6.4	23	2	6	4	7
CHEMBL1978318	Nc1c(Cl)ncnc1NCCCNc2ncnc(Cl)c2N	328.072	1.652	-6.3	21	2	6	4	8
CHEMBL191020	Oc1ccc(\C=C\S(=O)(=O)CS(=O)(=O)\C=C\c2ccc(O)c(O)c2)cc1O	412.029	1.938	-7.5	27	2	6	4	8
CHEMBL1852234	CC(=O)c1c(C)onc1c2nc(c[nH]2)[C@@H](O)[C@H](O)[C@H](O)CO	311.112	-0.677	-6.5	22	2	6	5	8
CHEMBL1987813	O[C@H]1CC2=C([C@@H](O)[C@H]1O)C(=O)c3c(O)ccc(O)c3C2=O	292.058	-0.74	-7.6	21	3	0	5	7
CHEMBL582524	CCNc1nc(NC(C)C)nc(NC(N)NOC)n1	270.192	-0.071	-6.5	19	1	8	5	9
ZINC000003406348	C[C@H]1CCCC[C@@H]1NC(=O)NC(=O)CSc1nc(N)cc(N)n1	338.152	1.138	-6.7	23	2	4	4	7
CHEMBL275399	CC(=O)[C@@]1(O)CC(O)c2c(O)c3C(=O)c4c(O)cccc4C(=O)c3c(O)c2C1	384.085	0.878	-7.7	28	4	1	5	8
CHEMBL3960449	CC(C)Oc1ccc(Cc2c(C)[nH]nc2O[C@@H]3O[C@H](CO)[C@@H](O)[C@H](O)[C@H]3O)cc1	408.19	0.275	-7.3	29	3	7	5	8
CHEMBL191884	CC(C)Nc1nc(NCc2ccc(cc2)S(=O)(=O)N)nc(NC(C)C)n1	379.179	1.772	-6.1	26	2	8	4	8
CHEMBL2000684	CC(O)(P(=O)(O)O)P(=O)(O)OCC(O)CN1CCOCC1	349.069	-1.275	-5.7	21	1	7	5	7
ZINC000005511757	Nc1cc(Cl)nc(N/N=C/c2ccc(O)cc2O)n1	279.052	1.569	-6.5	19	2	3	4	7
ZINC000096151488	CNC(=O)c1noc(CNC(=O)Nc2ccc(C(=O)NCCOC)cc2)n1	376.15	0.127	-6	27	2	8	4	7
CHEMBL3646537	COc1ccc(Nc2ncc(CN[C@H](C)CO)cc2c3nc(C)nc(N)n3)cn1	396.202	1.442	-7.4	29	3	8	4	10
CHEMBL2106491	Cl.CC(=O)C1=C(O)[C@H](N)[C@@H]2Cc3c(C)c4ccc(C)c(O)c4c(O)c3C(=O)[C@]2(O)C1=O	447.108	1.687	-4	31	4	1	5	8
ZINC000408526589	Cc1ccccc1N1C(=O)NC(=O)/C(=C\NC(CO)(CO)CO)C1=O	349.127	-1.233	-6	25	2	6	5	7
CHEMBL3904275	CC1(CNc2nc(NC3CC3)n4ncc(\C=C\5/NC(=O)NC5=O)c4n2)COC1	384.166	0.327	-7.5	28	5	6	4	9
CHEMBL1794939	CN1CCC2(CC1)C\C(=N\OC(=O)C)\CO2.OC(=O)\C=C/C(=O)O.OC(=O)C(=O)O	432.138	-0.342	-3.4	30	2	3	4	9
CHEMBL1993692	Cc1nc(Nc2ccc(Cl)cc2)sc1C(=O)NNC(=O)C(=O)NN	368.046	0.599	-6.5	24	2	3	5	7
CHEMBL3763206	Nc1nc(NCC(=O)NO)c2nc[nH]c2n1	223.082	-1.148	-6.3	16	2	3	5	7
ZINC000006269125	Nc1cc(N)nc(SCC(=O)Nc2cccc(C(=O)O)c2)n1	319.074	1.07	-6.8	22	2	5	4	7
ZINC000097636574	O=C(O)CNc1ncc(CN2CCN(CCO)C[C@H](O)C2)cn1	325.175	-1.556	-6.1	23	2	7	4	8
ZINC000257289609	CN(CCO)C(=O)[C@@H]1CS[C@@H]2[C@H](O)[C@@H](O)[C@H](O)[C@H](O)C(=O)N12	336.099	-3.836	-5.7	22	2	3	5	8
ZINC000005953856	CCSc1ccc(C(=O)NC(CO)(CO)CO)cc1[N+](=O)[O-]	330.089	0.152	-5.8	22	1	8	4	7
ZINC000219150671	Nc1nc(NCCOCCO)cc(C2CC(O)C2)n1	268.154	-0.282	-6	19	2	7	4	7
ZINC000104063281	O=C(O)/C(Cc1nc(O)cc(O)n1)=N\O	213.039	-0.655	-5.9	15	1	3	4	7
ZINC000078547577	COc1cc(/C=N/N=C/c2cc(N)c(O)c(OC)c2)cc(N)c1O	330.133	1.732	-4.8	24	2	5	4	8
CHEMBL326405	CN(CC1Cc2c(N)nc(N)nc2NC1=O)c3ccc(cc3)C(=O)O	342.144	0.586	-7.3	25	3	4	4	7
CHEMBL462959	O[C@H]1CC[C@H](O)[C@@H]2[C@@H]1C[C@@]34SS[C@]5(C[C@@H]6[C@@H](O)CC[C@H](O)[C@H]6N5C3=O)C(=O)N24	428.108	-0.747	-6	28	7	0	4	8
ZINC000253535332	Nc1nc(O)cc([C@H]2C[C@@H](NC(=O)c3ccc(SCCO)cc3)C2)n1	360.126	1.525	-6	25	3	6	4	7
CHEMBL2326675	N[C@@H](Cc1ccc2OP(=O)(O)OCc2c1)C(=O)N[C@@H](CC(=O)O)C(=O)N	387.083	-0.989	-6.8	26	2	7	5	7
CHEMBL3392263	O.CC(C)(C)C(=O)NCCNCC(O)COc1ccccc1C#N.OC(=O)C(=O)O	427.195	-0.619	-1.5	30	1	8	5	7
CHEMBL2064165	CNCc1cc(c2ccccc2CO)n(c1)S(=O)(=O)c3cccnc3.OC(=O)\C=C\C(=O)O	473.126	1.711	-4.2	33	3	8	4	8
ZINC000082138929	Nc1nc2[nH]cnc2c(N2CCC3(CC2)Nc2ccccc2NC3=O)n1	350.16	1.338	-6.7	26	5	1	4	7
ZINC000299777890	COC(=O)c1cc(NC(=O)N[C@@H]2CCNC[C@H]2O)cc(C(=O)OC)c1	351.143	0.104	-6.8	25	2	4	4	7
ZINC000009060121	Nc1c(NCCO)cc(NCCO)c2c1C(=O)c1ccccc1C2=O	341.138	0.853	-7.6	25	3	6	5	7
CHEMBL495775	Oc1cc(O)c2C(=O)c3ccc(\C=N\NC4=NCCN4)cc3Oc2c1	338.102	1.24	-6.9	25	4	2	4	8
CHEMBL446181	NC(=N)N\N=C\c1c(nc2sccn12)c3cc(O)ccc3O	316.074	1.291	-7.8	22	3	3	5	7
CHEMBL43620	COC(=O)CCNC(=O)[C@@H]1C[C@@H](CN1)SC2=C(N3[C@H]([C@H]2C)[C@@H]([C@@H](C)O)C3=O)C(=O)O	441.157	-0.717	-6.4	30	3	8	4	8
CHEMBL25868	Cc1ncc(COP(=O)(O)O)c(\C=N\OCC(F)CN)c1O	337.084	0.352	-6.4	22	1	8	4	7
CHEMBL1998323	COc1ccc(\C=N\N=C(N)N)c(C(=O)O)c1OC.O[N+](=O)[O-]	329.097	-0.338	-2.6	23	1	5	4	7
ZINC000017224175	CCOC(=O)C1=C[C@@](C)(C(=O)OCC)Nc2c(nc(N)[nH]c2=O)N1	337.139	-0.042	-7.1	24	2	4	4	9
ZINC000100023235	O/N=C1\c2nn[nH]c2/C(=N\O)c2nn[nH]c21	220.046	-1.311	-6.5	16	3	0	4	8
CHEMBL455358	COc1cc(cc(O)c1OC)[C@@H](O)[C@H](C)N.OC(=O)C(=O)O	317.111	-0.054	-3.4	22	1	4	5	7
CHEMBL3415959	NC1=Nc2ncc(CNc3ccc(cc3)C(=O)NO)nc2C(=O)N1	327.108	0.026	-7.7	24	3	4	5	8
ZINC000003897429	C[C@@H]1O[C@@H](Nc2ccc(Cl)c([N+](=O)[O-])c2)[C@@H](O)[C@@H](O)[C@@H]1O	318.062	0.488	-6.3	21	2	3	4	7
CHEMBL575221	CC1(C)CC(=O)C2=C(C1)N=C3NN=C([C@@H](O)[C@H](O)[C@H](O)CO)N3C2c4ccc(Cl)cc4	448.151	0.688	-6.6	31	4	5	5	9
CHEMBL145717	NC(CC[S+]([O-])CC1CC(C(O)C1O)n2cnc3c(N)ncnc23)C(=O)O	398.137	-1.758	-6.7	27	3	7	5	10
CHEMBL3926144	COC(=O)N[C@@H]1CC[C@H](CC1)Nc2cc(NC3CC3)n4ncc(\C=C\5/NC(=O)NC5=O)c4n2	454.208	1.563	-8.1	33	5	6	5	9
ZINC000020932283	CCNc1nc(NCC)nc(N/N=C/c2ccc(O)cc2O)n1	317.16	1.592	-6.6	23	2	7	5	9
CHEMBL189281	CCc1cc(C(=O)C)c(O)cc1OCc2cccc(n2)C(=O)NC(C)C(=O)NO	401.159	1.755	-7.4	29	2	8	4	7
ZINC000003954014	O=C(O)[C@@H](O)[C@@H](O)[C@@H](O)[C@@H](O)c1nc2ccccc2s1	299.046	-0.503	-6.4	20	2	5	5	7
CHEMBL1201883	NC1=CC(=N)NC(=N1)SCc2cccnc2.OC(=O)CCC(=O)O	351.1	1.094	-4.7	24	2	6	5	7
CHEMBL1366768	Cc1occc1c2oc(SCCNCCO)nn2.OC(=O)C(=O)O	359.079	0.468	-3.4	24	2	7	4	9
ZINC000005063488	Cc1ccc(S(=O)(=O)N/N=C\[C@H](O)[C@H](O)[C@H](O)CO)cc1	318.089	-1.666	-6.8	21	1	7	5	7
ZINC000014066486	CCOC(=O)C1=C(CSc2n[nH]c(N)n2)NC(=O)N[C@H]1C	312.1	-0.002	-6.4	21	2	5	4	7
CHEMBL3621280	ONC(=O)CNC(=O)Cn1cnc2c(NCc3ccccc3)ncnc12	355.139	0.06	-7	26	3	7	4	8
CHEMBL516233	O[C@H]1C=C2[C@@H](NCc3c(O)c4OCOc4cc23)[C@H](O)[C@@H]1O	293.09	-0.928	-7.3	21	4	0	5	7
ZINC000244858626	CNc1cc([C@H]2C[C@@H](NC(=O)c3n[nH]nc3C)C2)nc(N)n1	302.16	0.203	-5.9	22	3	4	4	7
CHEMBL2003408	Cc1ccc(cc1)S(=O)(=O)O.N\C(=N/O)\N\N=C\c2ccc3OCOc3c2	394.095	1.284	-5.3	27	3	3	4	7
CHEMBL2012389	C[C@H]1C\C=C\[C@@H](O)[C@@H](O)CCC(=NO)Cc2cc(O)cc(O)c2C(=O)O1	365.147	1.478	-5.3	26	2	0	5	8
CHEMBL1962616	NC(=N)NC(=O)c1nc(Cl)c(NCc2ccncc2)nc1N	320.09	0.343	-7.5	22	2	4	5	7
CHEMBL451715	O[C@H]1C=C2[C@@H](NC(=O)c3c(O)c4OCOc4cc23)[C@@H]5OP(=O)(O)O[C@H]15	369.025	-0.125	-7.2	25	5	0	4	8
CHEMBL1092919	COC(=O)[C@]1(CO)NC(=O)C(C)(C)[C@@]1(O)C#CCNC(=O)C(C)(C)C(O)c2ccccc2	446.205	-0.343	-6.1	32	2	6	5	7
ZINC000408527277	COc1cc(N2N=C(C)/C(=C/NC(CO)(CO)CO)C2=O)ccc1Cl	369.109	0.26	-6.3	25	2	7	4	7
ZINC000008175144	CNc1nnc(S[C@@H](C)C(=O)Nc2ccc3[nH]c(=O)[nH]c3c2)s1	350.062	1.869	-7	23	3	5	4	7
CHEMBL226252	Nc1nc(N)c(c2ccc(Cl)c(Cl)c2)c(n1)[C@H](O)[C@H](O)CO	344.044	1.001	-6.5	22	2	4	5	7
CHEMBL215645	CCN(C)C(=O)Oc1cccc(c1)[C@H](C)N(C)C.OC(C(O)C(=O)O)C(=O)O	400.185	0.637	-4.3	28	1	7	4	7
ZINC000001882405	NNc1nc(NN)nc(N2CCOCC2)n1	226.129	-1.721	-6.4	16	2	3	4	9
ZINC000261615524	O=C(O)CCCNS(=O)(=O)c1ccc2nc(O)nc(O)c2c1	327.053	0.184	-7.2	22	2	6	4	7
CHEMBL1159475	OC[C@H]1OC(Oc2ccc(cc2)C3(N=N3)C(F)(F)F)[C@H](O)[C@@H](O)[C@@H]1O	364.088	0.046	-7.1	25	3	4	4	8
CHEMBL190139	NC1N=CNc2c(CN3CC(O)C(CSc4ccncc4)C3)c[nH]c12	358.158	1.406	-6.5	25	4	5	4	7
CHEMBL112887	OCC(O)CSc1cccc2C(=O)c3c(SCC(O)CO)cccc3C(=O)c12	420.07	1.353	-6.7	28	3	8	4	8
ZINC000040387438	CC(CO)(CO)N1CNC(=NS(=O)(=O)c2cccc3nsnc32)NC1	386.083	-1.111	-5.3	25	3	5	4	8
ZINC000004982798	OC[C@@H](O)[C@@H](O)[C@H](O)c1cnn(-c2ccc(Br)cc2)n1	343.017	-0.223	-6.6	20	2	5	4	7
ZINC000016957464	Nc1nc(O)c(N=O)c(NCCO)n1	199.071	-0.434	-5.1	14	1	4	4	8
ZINC000012534119	Nc1ccccc1C1=NC(=O)[C@@]2(CC(c3cc4ccccc4o3)=NN2)NN1	360.133	1.49	-7.8	27	5	2	4	7
ZINC000328991991	C[C@H](CO)Nc1nc(NNc2ccc(S(=O)(=O)O)cc2)cc(C2CC2)n1	379.131	1.832	-6.2	26	3	8	5	8
ZINC000308455712	Nc1nnc([C@H](O)[C@H](O)[C@@H](O)CO)s1	221.047	-2.132	-5.3	14	1	4	5	8
ZINC000003425612	CC[C@H](C)NC(=O)NC(=O)CSc1nc(N)cc(N)n1	298.121	0.357	-6.5	20	1	5	4	7
CHEMBL92988	COC(=O)CC1(CC(=NO1)c2cccc(c2)C(=N)N)C(=O)Nc3ccc(cc3)C(=N)N	422.17	1.32	-7.1	31	3	7	5	7
ZINC000004024255	CC(=O)N[C@@H]1[C@@H](O)[C@H](O)[C@@H](CO)O[C@H]1OCCCCN=[N+]=[N-]	318.154	-0.963	-6	22	1	8	4	7
CHEMBL3937823	O=C(N[C@@H]1CC[C@H](CC1)Nc2nc(NC3CC3)n4ncc(\C=C\5/NC(=O)NC5=O)c4n2)C6(CC6)C#N	490.219	1.022	-7.4	36	6	7	5	10
ZINC000004336496	OC[C@H](O)[C@H](O)[C@@H](O)[C@@H](O)[C@@H]1SC(c2ccccc2)=NN1c1ccccc1	390.125	0.364	-7.1	27	3	7	5	8
ZINC000062022645	CC[C@@H](CO)Nc1nc2n[nH]nc2c(Nc2ccc(C)cc2)n1	313.165	1.983	-6.9	23	3	6	4	7
CHEMBL555079	Br.CC(C)(NCc1cc(cc2nc(O)c(O)nc12)[N+](=O)[O-])C(=O)O	402.017	1.48	-7.6	24	2	5	4	8
CHEMBL65857	CN1C(=O)C[C@H](NC1=O)C(=O)N[C@H](Cc2c[nH]cn2)C(=O)N3CSC=C3C(=O)N	421.117	-1.763	-6.8	29	3	6	4	7
ZINC000100998424	CC(=O)NC1=NN(c2ccccc2)C(=O)[C@H]1S[C@@H]1N=C(N)NN1	333.101	-0.709	-7.4	23	3	3	4	8
ZINC000002315605	O=C(NCCNC(=O)c1ccc(O)nn1)c1ccc(O)nn1	304.092	-1.162	-6.8	22	2	5	4	8
CHEMBL594503	C[C@@H](O)[C@H](NC(=O)CN(C1CC1)c2nc(Cl)nc3[nH]cnc23)C(=O)O	368.1	-0.075	-6	25	3	7	4	7
CHEMBL206152	OC(C(O)C(=O)O)C(=O)O.Fc1ccc(CN(CCC#N)C2CCNCC2)c(c1)C(F)(F)F	479.168	1.19	-6.8	33	2	8	5	7
CHEMBL3426108	CC(=O)N[C@@H]1[C@@H](N)[C@@H](F)[C@@](F)(O[C@H]1[C@H](O)[C@H](O)CO)C(=O)OCc2cccs2	424.112	-1.26	-6.2	28	2	7	5	9
CHEMBL1996892	NC1=Nc2ccc(Sc3ccc4N=C(N)NC(=O)c4c3)cc2C(=O)N1	352.074	1.475	-6.2	25	4	2	4	7
ZINC000017417526	O=C1C=C/C(=N/Nc2cc(Cl)cc(S(=O)(=O)O)c2O)C(O)=C1	343.987	1.641	-7	22	2	3	4	7
ZINC001569975877	CN1CCN2c3ccc(O[C@@H]4O[C@H](C(=O)O)[C@@H](O)[C@H](O)[C@H]4O)cc3Cc3ccccc3[C@H]2C1	456.19	0.355	-5.3	33	5	3	4	8
CHEMBL2408896	Cc1ncc(C[C@H](NC(=O)[C@H]2O[C@@H]2C(=O)O)C(=O)Nc3nc(cs3)c4ccc(F)cc4)[nH]1	459.101	1.499	-6.7	32	4	8	4	7
CHEMBL423484	CS(=O)(=O)OCC1OC(CO)C(O)C(O)C1O	272.057	-3.195	-6	17	1	4	4	8
ZINC000101156770	CCn1c2ccccc2c(O)c(/C(C)=N/C(CO)(CO)CO)c1=O	334.153	0.252	-6.5	24	2	6	4	7
CHEMBL3199106	COc1cc(NC(=O)C\C(=N\NC(=O)C(=O)NCCO)\C)c(OC)cc1Cl	400.115	0.286	-7	27	1	8	4	7
CHEMBL1964723	CC(C)(C)OC(=O)NCC(=O)NC1[C@H](O)\C(=N/O)\c2sccc12	341.105	0.983	-6.3	23	2	3	4	7
ZINC000001699060	O=C(Nc1ccc(C2=NCCN2)cc1)c1cc(C(=O)Nc2ccc(C3=NCCN3)cc2)ncn1	454.187	1.681	1.6	34	5	6	4	8
ZINC000022859761	C[C@@]1(CO)COC(=O)[C@@](C)([C@]2(C)N[C@](C)(CO)COC2=O)N1	316.163	-1.701	-6.3	22	2	3	4	8
CHEMBL1998306	COc1cc(\C=N\N=C(/N)\NO)cc(Cl)c1O.Cc2ccc(cc2)S(=O)(=O)O	430.071	1.923	-5.6	28	2	4	5	7
CHEMBL1909802	Cl.CNCCN(C)c1nc(N)c(nc1Cl)C(=O)NC(=N)N	336.098	-0.587	-6.7	21	1	5	5	7
CHEMBL425198	OCC1O[C@@H](O\N=C\c2cc(ccc2O)[N+](=O)[O-])C(O)[C@@H](O)C1O	344.086	-1.549	-6.5	24	2	5	5	10
ZINC000009328705	Nc1nc(Nc2ccc(Cl)cc2)nc(NCCO)c1[N+](=O)[O-]	324.074	1.768	-6.4	22	2	6	4	8
CHEMBL3948806	O=C(Nc1cc(NC2CC2)n3ncc(\C=C\4/NC(=O)NC4=O)c3n1)c5cnsc5	410.091	1.193	-7.7	29	5	5	4	9
CHEMBL3322345	OC[C@H]1O[C@@H](NC(=O)C2=Cc3cc(Cl)ccc3OC2)[C@H](O)[C@@H](O)[C@@H]1O	371.077	-0.968	-6.9	25	3	3	5	7
ZINC000004879692	Cc1c2cccc(O)c2c(O)c2c1C[C@H]1CC(O)=C(C(N)=O)C(=O)[C@@]1(O)C2=O	383.101	0.916	-6.6	28	4	1	5	7
CHEMBL502002	COC(=O)Cn1cc(C[C@@H]2O[C@H](CO)[C@H](O)[C@H](O)[C@H]2O)nn1	317.122	-3.164	-6.5	22	2	5	4	10
CHEMBL3542365	CC(CO[C@@H]1O[C@@H]([C@@H](O)[C@H](O)[C@H]1O)C(=O)O)[C@]2(C)SC(=NC2=O)N[C@H]3C[C@@H]4CC[C@H]3C4	458.172	-0.302	-7	31	4	6	5	9
ZINC000104201432	COc1ccc(/C(=N\N)C2=NNC3(CCCCC3)NN2)cc1	302.186	1.029	-7.6	22	3	3	4	7
CHEMBL1808678	OCC(CP(=O)(O)O)OCCn1cnc2C(=O)NC=Nc12	318.073	-1.325	-6.2	21	2	7	4	7
CHEMBL205955	CS(=O)(=O)c1ccc(CNc2ccc(cc2)c3c(N)nc(N)nc3CN)cc1	398.152	1.782	-6.4	28	3	6	4	8
ZINC000002243083	O=S(=O)(O)c1cc2cc(S(=O)(=O)O)c(O)cc2c(S(=O)(=O)O)c1	383.928	0.286	-7.6	23	2	3	4	7
CHEMBL1253725	OC[C@@H](O)[C@@H]1O[C@H]([C@H](O)[C@H]1O)N2C=CNC2=S	262.062	-1.482	-5.9	17	2	3	5	7
CHEMBL2112541	Cc1nc(O)nc(O)c1\C=C\C(=O)N[C@@H](CO)C[S@@+]([O-])CCl	349.05	-0.368	-5.8	22	1	7	4	7
ZINC000064219733	CC(=O)N[C@@H]1[C@H](O)O[C@](Br)(CO)[C@](O)(Cl)[C@@]1(O)n1ccc2ccccc21	448.004	0.151	-6.6	26	3	3	5	7
CHEMBL1255023	Nc1nc(N)c2nc(CNc3ccc(cc3)C(=O)NCCc4ccc(cc4)S(=O)(=O)O)cnc2n1	494.148	1.415	-6.8	35	4	8	5	10
CHEMBL3302141	C\C(=C/1\C(=O)OC(=O)C(=C1O)C(=O)C)\Nc2ccc(O)c(N)c2	318.085	1.145	-6.8	23	2	3	4	8
CHEMBL1192698	CN(C)CCn1nc2c3c(O)ccc(O)c3C(=O)c4c(NCCN)ccc1c24	381.18	1.591	-7.5	28	4	6	4	8
ZINC000254405939	CN(CCN(C)N=Cc1ccc(O)cc1O)N=Cc1ccc(O)cc1O	358.164	1.741	-6.7	26	2	7	4	8
ZINC000009969302	CCOC(=O)C1=C(CS(=O)(=O)c2ccc(F)cc2)NC(=O)N[C@H]1c1ccc(O)c(O)c1	450.09	1.882	-6.7	31	3	6	4	7
CHEMBL3804930	OC[C@H]1OC(O)[C@H](NC(=O)c2cc(cc(c2)C(F)(F)F)c3ccc(cc3)C#N)[C@@H](O)[C@@H]1O	452.12	0.774	-6.6	32	3	4	5	7
CHEMBL1644786	C\C(=C/c1cc(F)c(OCC(F)C2CC2)cc1F)\C(=O)N[C@@H]3[C@H](O)[C@@H](O)[C@H]4OCO[C@H]4[C@@H]3O	473.166	0.818	-6.5	33	4	7	4	7
CHEMBL309926	Nc1ncnc(N[C@@H]2O[C@H](CO)[C@@H](O)[C@H]2O)c1[S+]([O-])c3ccccc3	366.1	-0.924	-6.4	25	3	5	5	9
ZINC000211032943	O=C1OC(c2ccccc2)=N/C1=C\NC(CO)(CO)CO	292.106	-0.863	-6.2	21	2	6	4	7
ZINC000253407044	CC(=O)c1c2c(c(O)c(C)c1O)[C@]1(C)C(=CC(=O)/C(=C(/C)NCCCO)C1=O)O2	401.147	1.541	-6.3	29	3	5	4	8
CHEMBL3542375	CC(C)[C@]1(C)SC(=NC1=O)N[C@H]2C[C@H]3C[C@@H]2C[C@H]3O[C@@H]4O[C@@H]([C@@H](O)[C@H](O)[C@H]4O)C(=O)O	458.172	-0.304	-5.6	31	4	5	5	9
ZINC000010798404	CNC(=O)NC(=O)[C@H](C)Sc1nnc(S[C@@H](C)C(=O)NC(=O)NC)s1	406.055	0.41	-7.1	25	1	6	4	9
ZINC000095431447	CC(C)(C)NC(=O)CNc1nc(NCC(=O)NC(C)(C)C)nc(OCC(F)(F)F)n1	435.221	1.466	-6.4	30	1	8	4	8
ZINC000012534115	Nc1ccccc1C1=NC(=O)[C@@]2(CC(c3cccs3)=NN2)NN1	326.095	0.805	-7.9	23	4	2	4	7
CHEMBL4068103	N[C@@H]1[C@@H](O)[C@H](O)[C@@H](CO)O[C@H]1c2nc(n[nH]2)c3ccc4ccccc4c3	356.148	0.106	-7	26	4	3	5	7
ZINC001772714626	CCOC(=O)[C@H](CCONC(=N)NC(=O)OC(C)(C)C)NC(=O)OC(C)(C)C	404.227	1.814	-6	28	0	7	4	8
CHEMBL260778	OC(=O)[C@@H](Cc1cc(O)c(O)cc1[N+](=O)[O-])OC(=O)\C=C\c2ccc(O)c(O)c2	405.07	1.669	-7.5	29	2	7	5	9
ZINC000016428467	O=C(Nc1ccc(NC(=O)Nn2cnnc2)cc1)Nn1cnnc1	328.114	0.421	-6.1	24	3	4	4	8
CHEMBL3908950	CSc1ccc(Cc2c(C)[nH]nc2O[C@@H]3O[C@H](CO)[C@@H](O)[C@H](O)[C@H]3O)cc1	396.136	0.21	-7.1	27	3	6	5	8
CHEMBL3668882	Cc1cc(Nc2nccc(n2)c3cn(C)cn3)cc4cc([nH]c14)C(=O)NNC=O	390.155	1.801	-7.2	29	4	6	4	7
CHEMBL3139276	CN(C1CN=C(NC(=O)N)NC1=O)C(=O)C[C@@H](N)c2cc(CN)on2	352.161	-2.496	-7.8	25	2	5	5	8
ZINC000004679170	N/C(=N/N=C/c1ccc(O)c(O)c1)S[C@@H]1CC(=O)N(c2ccc(C(=O)O)cc2)C1=O	428.079	1.51	-7.2	30	3	5	4	8
CHEMBL3764966	CC1(C)[C@H](NC(=O)\C(=N/OCc2ccc(cc2)C(=O)O)\c3csc(N)n3)C(=O)N1S(=O)(=O)O	497.068	0.253	-6.6	33	3	8	4	10
CHEMBL1981756	NC1=NC(=O)C(=C(N)N1)\N=N\c2ccc(cc2)[As](=O)(O)O	354.006	-1.089		21	2	3	5	7
CHEMBL343132	C[C@@H](O)[C@@H]1[C@H]2[C@@H](C)C(=C(N2C1=O)C(=O)O)S[C@@H]3CN[C@@H](C3)C(=O)N4CC\C(=N\O)\C4	438.157	-0.334	-6.9	30	4	5	4	8
ZINC000253534905	Nc1[nH]nc(C(=O)N[C@@H]2C[C@H](c3cc(O)nc(N)n3)C2)c1-c1ccccc1	365.16	1.413	-7.5	27	4	4	5	7
CHEMBL2323133	CNC1=NS(=O)N=C1NCCSCc2oc(CN(C)C)cc2.OC(=O)C(=O)O	433.109	-0.072	-3.4	28	2	7	4	8
ZINC000006015772	Nc1nc(SCC(=O)CSc2n[nH]c(N)n2)n[nH]1	286.042	-0.459	-6.1	18	2	6	4	9
ZINC000102190836	NC1=N[C@@H]([C@H](O)[C@H](O)[C@H](O)CO)C=N1	203.091	-3.171	-5.5	14	1	4	5	7
CHEMBL603719	CNc1nn(C2O[C@H](CO)[C@@H](O)[C@H]2O)c3N=CNC(=O)c13	297.107	-2.227	-6.9	21	3	3	5	9
ZINC000003260650	NC1=C(c2nc3ccccc3[nH]2)C(=O)CN1CCCN1CC(=O)C(c2nc3ccccc3[nH]2)=C1N	468.202	1.553	-5.6	35	6	6	4	8
CHEMBL3247611	NCCCCCCS(=O)(=O)[C@H]1O[C@H](CO)[C@@H](O)[C@H](O)[C@@H]1O	327.135	-2.28	-6.4	21	1	8	5	8
ZINC000245229464	N1SNSNSNS1	187.932	0.611	-4	8	1	0	4	8
ZINC000244690965	Nc1nc(NCc2ccc(S(N)(=O)=O)cc2)cc([C@H]2C[C@@H](O)C2)n1	349.121	0.557	-6.9	24	3	5	4	7
ZINC000004476690	N#C/C(=N\Nc1nc[nH]c1[N+](=O)[O-])C(=N)S	239.023	0.516	-5.8	16	1	4	4	7
ZINC000005566508	NC(=O)OCC1=C(COC(N)=O)C(=O)c2c(O)ccc(O)c2C1=O	336.059	-0.036	-7.3	24	2	4	4	8
CHEMBL2219757	CCOCC.NC(=O)c1nonc1CNC(C2CCNCC2)c3c[nH]cn3	379.233	0.765	-2.8	27	3	8	4	8
CHEMBL3527373	O[C@@H]1[C@@H](O)[C@H](Oc2ccc(cc2)[C@H]3CN4CCSC4=N3)O[C@@H]([C@H]1O)C(=O)O	396.099	-0.583	-4	27	4	4	4	9
CHEMBL1205895	Clc1cc(NC(=O)c2nnn[nH]2)nc(NC(=O)c3nnn[nH]3)c1	335.039	-0.734	-7.1	23	3	4	4	9
CHEMBL1427058	COc1ccc(cc1[N+](=O)[O-])C(=O)NC(=S)NNC(=O)c2ccc(O)cc2	390.063	1.258	-7.6	27	2	4	4	7
CHEMBL1419346	N.Oc1nc(O)c(Cc2ccc3OCOc3c2)c(O)n1	279.086	1.075	-1.2	20	3	2	4	8
ZINC000005511759	Nn1cnnc1N/N=C/c1ccc(O)cc1O	234.087	-0.151	-6.3	17	2	3	4	8
ZINC000006379155	COC(=O)C1=C(c2ccc(Cl)cc2)[C@H](O)NC(NN)=N1	296.068	-0.035	-6.3	20	2	2	4	7
CHEMBL3248263	CC(=O)NCc1cc(N\C(=C/2\C(=C(C(=O)C)C(=O)OC2=O)O)\C)ccc1O	374.111	1.199	-7	27	2	5	4	8
CHEMBL3765686	OCc1c(O)c(ncc1CS(=O)(=O)c2ccc(F)cc2)C(=O)NO	356.048	0.511	-7.3	24	2	5	4	7
CHEMBL440479	CCc1nc(N)nc(N)c1c2ccc(Cl)c(c2)\N=N\N(CCO)CCO	379.152	1.809	-6.6	26	2	8	4	8
ZINC000408631426	CCCc1nc(S/C(=C/C2C(=O)NC(=O)NC2=O)C(=O)O)n[nH]1	339.064	-0.2	-7.1	23	2	6	4	7
CHEMBL3230040	CC(=O)C1=C(O)\C(=C(/O)\Nc2ccc(N)cc2)\C(=O)OC1=O	304.07	0.935	-7	22	2	3	4	8
ZINC000004962535	OC[C@@H]1O[C@@H](n2cc(Br)c3c2ncnc3NO)[C@H](O)[C@@H]1O	360.007	-0.394	-6.9	21	3	3	5	9
CHEMBL235774	OC[C@@H](O)[C@@H]1O[C@@H](SN(Cc2ccccc2)Cc3ccccc3)[C@H](O)[C@H]1O	391.145	1.137	-7.1	27	3	8	4	7
ZINC000003668393	Nc1nc(SCSc2n[nH]c(N)n2)n[nH]1	244.031	-0.071	-5.7	15	2	4	4	8
CHEMBL3238479	[NH3+]c1cc(cc2C=C(\C(=N\Nc3ccc(cc3F)C(=O)O)\C(=O)c12)S(=O)(=O)O)S(=O)(=O)[O-]	485	0.195	-7.7	32	3	5	4	9
CHEMBL290852	CNC(=O)OCCN(CCOC(=O)NC)Cc1cc(O)c2C(=O)c3c(O)cccc3C(=O)c2c1	471.164	1.387	-7.2	34	3	8	4	9
CHEMBL164548	COc1ccc(cc1)S(=O)(=O)N2Cc3cc(O)c(O)cc3C[C@@H]2C(=O)NO	394.083	0.727	-7.6	27	3	4	4	7
ZINC000032110927	Oc1ccc(/C=N\Nc2nncn2/N=C\c2ccc(O)c(O)c2)cc1O	354.108	1.429	-7.3	26	3	5	5	10
CHEMBL3228830	O[C@@H]1[C@H](O)[C@H](O)[C@@H](NC(=O)N(CCCl)N=O)[C@@H]1O	283.057	-2.256	-6.2	18	1	4	5	7
ZINC000033656315	O=C(O)c1cc([N+](=O)[O-])c(NC(CO)CO)c([N+](=O)[O-])c1	301.055	-0.034	-6.2	21	1	7	4	8
ZINC000005886474	Nc1cc(=O)[nH]c(SCc2ccc(CSc3nc(N)cc(=O)[nH]3)cc2)n1	388.078	1.602	-7.5	26	3	6	4	8
ZINC000952856441	CC(C)[C@H]1NC(=O)CCN=C2C=C(CCNC(=O)[C@H](C)NC1=O)N=C(N1CCCC1)N2	431.264	-0.121	-3.8	31	3	1	4	7
ZINC000005819398	Nc1ncn(C[C@@H](O)CO)c2nc(S)nc1-2	241.063	-0.998	-6	16	2	3	4	8
CHEMBL542847	Cl.Cl.CC1(C)N=C(N)N=C(N)N1c2cccc(c2)N3C(=NC(=NC3(C)C)N)N	428.172	0.901	-7.1	28	3	2	4	10
CHEMBL3896075	C[C@H](Nc1nc2c(\C=C\3/NC(=O)NC3=O)cnn2c(NC4CC4)c1C#N)C5CC5	392.171	1.566	-7.7	29	5	6	4	8
ZINC000575420527	O=C(Nc1nc2[nH]cnc2c(O)n1)N[C@@H]1CCS(=O)(=O)C1	312.064	-0.633	-6.3	21	3	2	4	7
ZINC000001748569	O=c1[nH]nc(SCc2ccccc2CSc2n[nH]c(=O)[nH]c2=O)c(=O)[nH]1	392.036	-0.186	-7.7	26	3	6	4	8
CHEMBL353488	NCCCCN(CCCN)c1nc(N)nc(N)n1	254.197	-1.07	-5.5	18	1	8	4	8
ZINC000095099962	NC(=S)N/N=C(/c1nc2ccc([N+](=O)[O-])cc2nc1O)[C@H](O)c1ccc([N+](=O)[O-])cc1	443.065	1.423	-7.6	31	3	6	4	10
CHEMBL1875618	Nc1cc(N)nc(SCC(=O)NCC(=O)Nc2ccc(F)c(F)c2F)n1	386.077	0.905		26	2	6	4	7
CHEMBL3769528	OC[C@H]1O[C@H]([C@H](O)[C@@H](O)[C@@H]1O)c2nc(cs2)c3ccccc3	323.083	0.325	-6.7	22	3	3	4	7
CHEMBL304696	Cc1nc(O)nc(O)c1\C=C\C(=O)N[C@@H](CO)C[S+]([O-])CSC(C)(C)C	403.124	0.924	-5.3	26	1	8	4	8
CHEMBL2420976	NC1=Nc2c(ncn2[C@H]3CCN(C3)C(=O)CP(=O)(O)O)C(=O)N1	342.084	-1.347	-7.2	23	3	3	4	7
CHEMBL3941762	NS(=O)(=O)OC[C@@H]1C[C@H](C[C@@H]1O)Oc2ncnc3nc([nH]c23)c4c[nH]c5ccccc45	444.122	1.24	-8.2	31	5	6	4	8
CHEMBL489127	COC(=O)\C=C\[C@H](O)[C@H](O)C1=C(C)C(=O)[C@@]2(O1)[C@@H](O)[C@](NC2=O)(OC)C(=O)c3ccccc3	461.132	-1.234	-7.5	33	3	7	4	10
ZINC000408731501	COc1cc(/C=N/NC(=N)N[N+](=O)[O-])ccc1OCC(=O)O	311.087	-0.202	-6.3	22	1	7	4	7
CHEMBL1587672	OCC1(CO)COC(=O)C(=N1)NNc2cc(Cl)ccc2Cl	333.028	0.589	-6.8	21	2	4	4	7
CHEMBL3247607	NCCCCCCO[C@H]1O[C@H](CO)[C@@H](O)[C@H](O)[C@@H]1O	279.168	-1.678	-6.1	19	1	8	5	7
CHEMBL3357472	OP(=O)(O)C(Nc1ncnc2nc(ccc12)c3cccs3)P(=O)(O)O	401.995	1.804	-6.7	25	3	5	5	7
ZINC000031829837	COC(=O)C1=C(C)N(NC(N)=O)C2(N)N(NC(N)=O)C(C)=C(C(=O)OC)C12C#N	408.151	-2.199	-5.1	29	2	4	5	10
ZINC000003637749	CCN(CC)c1ccc(/C=N/NC(=N)c2nonc2N)c(O)c1	317.16	1.153	-6.6	23	2	6	4	8
ZINC000102335924	O=C(O)C1=C[C@@H](c2ccc(O)c(O)c2)n2nc(C(F)(F)F)nc2N1	342.058	1.691	-8.6	24	3	2	4	7
CHEMBL3923371	O=C1NC(=O)\C(=C\c2cnn3c(NC4CC4)nc(Nc5ccc(cc5)n6cccn6)nc23)\N1	442.161	1.808	-8	33	6	6	4	10
CHEMBL1161238	O[C@@H]1C[C@@H](O)[C@@H](OS(=O)(=O)O)[C@@H](C1)OCCCCc2ccccc2O	376.119	0.804	-6.6	25	2	8	4	7
CHEMBL525202	Cc1nc(NCc2ccccc2)sc1C[C@@H]3O[C@H](CO)[C@H](O)[C@H](O)[C@H]3O	380.141	0.449	-7.4	26	3	6	5	8
CHEMBL2159432	CC(C)c1[nH]nc(O[C@@H]2O[C@H](CO)[C@@H](O)[C@H](O)[C@H]2O)c1Cc3ccccc3C#N	403.174	0.174	-7.1	29	3	6	5	8
ZINC000039715710	O=S(=O)(O)c1ccc(O)c(/C=N/CC/N=C/c2cc(S(=O)(=O)O)ccc2O)c1	428.035	1.129	-7.4	28	2	7	4	8
CHEMBL2132563	OC[C@H]1O[C@H]([C@H](O)[C@@H](O)[C@H]1O)c2nc(cs2)c3onc(n3)c4ccc(F)cc4	409.074	0.514	-7.5	28	4	4	4	10
CHEMBL3705002	CCc1ccc(cc1Cc2ccc3OCCOc3c2)[C@@H]4O[C@H](COP(=O)(O)O)[C@@H](O)[C@H](O)[C@H]4O	496.15	1.243	-7.2	34	4	7	5	8
CHEMBL3950973	O=C1NC(=O)\C(=C\c2cnn3c(NC4CC4)nc(NC5CCS(=O)(=O)C5)nc23)\N1	418.117	-0.522	-7.8	29	5	5	4	10
CHEMBL3935957	OC(=O)C(Nc1nc(NC2CC2)n3ncc(\C=C\4/NC(=O)NC4=O)c3n1)c5ccccc5F	452.136	1.256	-8.6	33	5	7	5	9
CHEMBL83647	Cc1ncc(CO)c(\C=N\CC\N=C\c2c(O)c(C)ncc2CO)c1O	358.164	1.027	-6.7	26	2	7	4	8
ZINC000009703621	O=C(NC(CO)(CO)CO)c1ccc(O)nn1	243.086	-2.372	-6.1	17	1	5	5	7
ZINC000067641689	Cc1nc(NCc2c(CO)cnc(C)c2O)cc(C2CCNCC2)n1	343.201	1.765	-7.7	25	3	5	4	7
ZINC000019329118	CCCN(C#N)C1N[C@@H](NCC)N[C@H](NCC)N1	255.217	-0.968	-5.6	18	1	7	5	7
CHEMBL1989693	Cc1ccc(cc1)S(=O)(=O)NC(=O)Nc2cc(Cl)c(cc2S(=O)(=O)N)S(=O)(=O)N	481.979	0.454	-7.2	29	2	5	4	7
ZINC000514288145	COC(=O)c1c(OS(=O)(=O)O)cccc1C(=O)c1cc(CO)cc(O)c1O	398.031	0.789	-6.8	27	2	6	4	9
ZINC000409415471	COc1cc([C@H](c2n(-c3nc[nH]n3)c(C)c(C)[n+]2[O-])C2C(=O)NC(=O)NC2=O)ccc1O	441.14	-0.326	-5.5	32	4	5	4	9
ZINC000038748121	NC1=C2C=CC=C[C@H]2NC(CSCC2=N[C@@H]3C=CC=CC3=C(N)N2)=N1	352.147	1.053	-7.4	25	4	4	4	7
CHEMBL221868	N[C@@H](C[C@@]1(C[C@H]2OC[C@@H](O)[C@@H](O)[C@H]2O1)C(=O)O)C(=O)O	291.095	-2.479	-6.2	20	2	4	5	7
ZINC001772592111	CC(C)C[C@@H]1C(=O)N[C@@H](CC(C)C)C(=O)N1O[C@@H]1O[C@H](CO)[C@@H](O)[C@H](O)[C@H]1O	404.216	-1.494	-6.6	28	2	7	5	8
CHEMBL2062294	Cc1ncc([N+](=O)[O-])n1CCSC(=S)N2CCCC2.OC(C(O)C(=O)O)C(=O)O	450.088	0.091	-4.5	29	2	7	4	10
ZINC000040457309	C[C@H](O)Nc1nnc(N[C@H](C)O)nn1	200.102	-1.233	-5.6	14	1	4	4	8
ZINC000002023481	CCNc1nc(NN)nc(NCC)n1	197.139	0.021	-5.5	14	1	5	4	7
CHEMBL387381	Nc1ncc(\C=C/c2cc(O)c(O)c(O)c2)c(N)n1	260.091	0.928	-6.6	19	2	2	5	7
CHEMBL1794937	CN1CCC2(CC1)C\C(=N/OC(=O)c3ccccc3)\CO2.OC(=O)\C=C/C(=O)O.OC(=O)C(=O)O	494.154	0.952	-3.3	35	3	4	4	9
CHEMBL2336884	COc1cc(cc(OC)c1O)C(=O)OC2CCC(CC2)NC(=N)NCCS	397.167	1.921	-5.8	27	2	7	5	7
ZINC000001845500	Nc1nc(N)nc(NCO)n1	156.076	-1.602	-4.9	11	1	2	4	7
CHEMBL1993089	CN(C)C1C(O)C2Oc3c4C(=O)c5cc6cc(C)ccc6c(O)c5C(=O)c4c(O)cc3C(C)(O2)C1O	491.158	1.951	-6	36	6	1	4	9
CHEMBL359640	CC1=C(SC2CCCCC2)N(COCNC(=O)CP(=O)(O)O)C(=O)NC1=O	421.107	0.495	-6.7	27	2	8	4	7
ZINC000257269096	O=C(NCCc1ccccc1)[C@@H]1CS[C@@H]2[C@H](O)[C@@H](O)[C@H](O)[C@H](O)C(=O)N12	382.12	-1.927	-6.8	26	3	4	5	7
CHEMBL124856	CC(C)[C@H](N)C(=O)NS(=O)(=O)OC[C@H]1O[C@H]([C@H](O)[C@@H]1O)c2nc(cs2)c3ccccc3	471.113	0.333	-7.1	31	3	8	4	10
ZINC000004947550	Oc1ccc(/C=N/Nc2nnn[nH]2)c(O)c1O	236.066	-0.238	-6.4	17	2	3	5	8
CHEMBL483890	C[C@H](COC1=CC(N)N(O)C(=N1)N)OCP(=O)(O)O	296.089	-1.311	-5.7	19	1	6	5	8
CHEMBL1159788	CO\N=C(/C(=O)NC1CN2N(C1=O)C(=C(C(=O)O)C2(C)C)C(=O)O)\c3csc(N)n3	438.096	-1.165	-6.6	30	3	6	4	10
ZINC000049546622	CCC(CO)(CO)NC(=O)C(=O)Nc1cccc(C(=O)c2nccn2C)c1	374.159	-0.161	-6.5	27	2	7	4	7
CHEMBL3322341	OC[C@H]1O[C@@H](NC(=O)COc2ccc(cc2)c3ccccc3)[C@H](O)[C@@H](O)[C@@H]1O	389.147	-0.352	-7.2	28	3	6	5	7
CHEMBL1204624	O[C@H]1C[C@H]2[C@@H](NC(=O)c3c(O)c4OCOc4cc23)[C@@H]5OP(=O)(O)O[C@H]15	371.041	-0.035	-7.4	25	5	0	4	8
ZINC000585091404	CC(C)[C@H](Nc1cc(NN)c([N+](=O)[O-])cc1[N+](=O)[O-])C(N)=O	312.118	0.71	-6.9	22	1	7	4	8
CHEMBL3988738	CNS(=O)(=O)CCNc1nc(NCCO)c2cnn(C)c2n1	329.127	-1.271	-6.5	22	2	8	4	9
CHEMBL608033	CCCCC#Cc1nc(N)c2ncn(C3O[C@H](C\N=C(/S)\NC)[C@@H](O)[C@H]3O)c2n1	419.174	0.075	-6.3	29	3	5	5	9
ZINC000013212093	Nc1nc(N)c2c(n1)NCN(O)C2	182.092	-0.785	-5.6	13	2	0	4	7
CHEMBL3546972	O=C1c2ccc(NC3=NCCN3)cc2C(=O)c4ccc(NC5=NCCN5)cc14	374.149	1.204	-6.9	28	5	2	4	8
ZINC000004932059	O=c1cc(CO)oc(C(c2ccc(F)cc2)c2oc(CO)cc(=O)c2O)c1O	390.075	1.308	-7.9	28	3	5	4	8
CHEMBL2007947	OC1C(O)C(CP(=O)(O)O)OC1COP(=O)(O)Oc2ccc(cc2)[N+](=O)[O-]	429.023	-0.243	-7	27	2	8	5	9
CHEMBL3926701	C[C@H](NC(=O)C1(N)CCN(CC1)c2ncnc(N)c2C(=O)N)c3ccc(Cl)cc3	417.168	0.986	-7.1	29	3	5	4	7
ZINC000017125198	COC(=O)[C@@H](CCC/N=C(\N)N[N+](=O)[O-])NC(=O)c1ccc2c(c1O)C(=O)c1ccccc1C2=O	483.139	0.315	-6.9	35	3	8	4	9
CHEMBL2002699	CC(C)C1CC(CO)(CNc2nc(N)nc(Cl)c2\C=N/O)C1	327.146	1.977	-6.9	22	2	6	4	7
CHEMBL3273165	COC1(C2CN(C)CC1CN(C)C2)c3ccccc3.OC(=O)CC(O)(CC(=O)O)C(=O)O	452.216	0.403	-5.1	32	3	7	4	7
ZINC000031853763	CC1(C)NC(C)(C)/C(=N/O)C(=NO)/C1=N/O	228.122	0.637	-6	16	1	0	4	7
CHEMBL3276794	C\C(=N/OCC(O)CNC(C)(C)C)\c1ccc(O)cc1.O[N+](=O)[O-]	343.174	1.534	-2.6	24	1	6	4	7
ZINC000009562070	CC(C)(C)NC(=O)NC(=O)CSc1nnc(SCC(=O)NC(=O)NC(C)(C)C)s1	462.118	1.971	-6	29	1	6	4	9
CHEMBL346923	Cc1ccc(cc1)S(=O)(=O)O.N\C(=N/O)\N\N=C\c2ccc3OCCOc3c2	408.11	1.327	-5.4	28	3	3	4	7
CHEMBL3943250	C[C@@H]1OC(=O)c2c(O)cc(NOCC(=O)O)cc2\C=C\C[C@H](O)[C@H](O)C(=O)\C=C/[C@H]1C	435.153	1.266	-5	31	2	4	5	9
CHEMBL426795	CC\C=C\CC1C(CC(=O)OC2C(O)C(O)C(O)C(O)C2O)CCC1=O	372.178	-0.942	-6.7	26	2	6	5	8
CHEMBL3144204	C[C@H](N)C(=O)N[C@@H](C)C(=O)Nc1ccc2C(=C(OCCSC(=N)N)OC(=O)c2c1)Cl	455.103	1.242	-6.2	30	2	8	5	8
CHEMBL543371	Br.CN(C1CN=C(Nc2nc(C)cs2)NC1=O)C(=O)C[C@@H](N)CCCCN	461.121	0.601	-6.8	27	2	8	4	8
CHEMBL442446	C[C@@H]1CC(=O)C2=C([C@H]1O)C3OC3[C@@]4(O)[C@@H](O)c5c(O)cccc5C(=O)[C@@H]24	358.105	0.017	-8.1	26	5	0	4	7
CHEMBL95745	NC1=NC(=N)C2C(N=CN2COCCO)C(=N1)N.OS(=O)(=O)C(F)(F)F	403.089	-1.909	-4.5	26	2	4	5	10
ZINC000108318172	O=S1(=O)NC[C@H](O)CNC[C@@]2(C[C@@H](O)[C@@H](O)C2)COc2cc(-c3ccccc3)ccc21	448.167	0.477	-9.3	31	4	1	5	7
CHEMBL112787	C[N+](C)(C)CC(Cn1cnc2c(N)nc(N)nc12)OCP(=O)(O)O	360.154	-0.783	-6.3	24	2	7	4	8
CHEMBL1965688	OCC[C@@H]1C2OC(C(O)C2O)N3C(=O)NC(=O)C=C13	270.085	-2.365	-7	19	3	2	4	7
CHEMBL1981957	C[S+](=O)(N)CCC(N)P(=O)(O)O.[O-]c1c(cc(cc1[N+](=O)[O-])[N+](=O)[O-])[N+](=O)[O-]	445.03	-0.673	-5.5	28	1	7	4	10
CHEMBL328015	CC(C)[C@H](NC(=O)OCc1ccccc1)C(=O)N[C@@H](C)C(=O)N[C@H]2CC(=O)OC2O	421.185	0.192	-7.5	30	2	8	4	7
CHEMBL583958	NS(=O)(=O)[C@@H]1O[C@@H]([C@@H](O)[C@H](O)[C@H]1O)C(=O)O	257.021	-3.833	-5.9	16	1	2	5	7
CHEMBL3236834	CC(=O)O[C@H]([C@H](O)COP(=O)(O)O)C(=O)NO	273.025	-2.106	-5.6	17	0	6	5	7
CHEMBL1443447	O.Cl.CN[C@@H]1[C@H](O)[C@H](NC)[C@H]2O[C@]3(O)[C@@H](O[C@H](C)CC3=O)O[C@@H]2[C@H]1O	386.146	-3.328	-1.5	25	3	2	5	9
CHEMBL1981558	Clc1ccc(cc1)C(C2C(=O)NC(=S)NC2=O)C3C(=O)NC(=S)NC3=O.c4ccncc4	489.033	0.799	-3.6	32	4	3	4	7
CHEMBL40769	OCCN(CCO)Cc1cc(O)c2C(=O)c3c(O)cccc3C(=O)c2c1	357.121	0.66	-6.5	26	3	6	4	7
ZINC000006170043	COc1cc([C@H]2NN=C(S)NN2)cc(OC)c1OC	284.094	0.609	-6.5	19	2	4	4	7
CHEMBL609955	ONC(=N)N\N=C\c1c(Cl)ccc(c1[N+](=O)[O-])[N+](=O)[O-]	302.017	0.993	-6.9	20	1	4	4	7
CHEMBL608761	CCNC(=O)[C@H]1OC([C@H](O)[C@@H]1O)n2cnc3c(N)[n+]([O-])cnc23	324.118	-2.598	-6.6	23	3	3	4	9
CHEMBL3962209	NCCNC(=O)c1ccc(s1)c2cc(NC3CC3)n4ncc(\C=C\5/NC(=O)NC5=O)c4n2	452.138	0.901	-8.8	32	5	7	5	9
ZINC000828000886	Cc1nc([C@H](C)NC(=O)CSc2nc(N)n[nH]2)n[nH]1	282.101	-0.217	-6.8	19	2	5	4	7
CHEMBL3580897	CNc1ncnc2c1ccn2[C@H]3[C@H](O)[C@H](O)C(=C3F)CO	294.113	-0.035	-6.7	21	3	3	4	7
CHEMBL1708635	CC(C)CCNc1nc(N)c(c(NCCO)n1)[N+](=O)[O-]	284.16	0.829	-6.1	20	1	8	4	8
CHEMBL522903	N[C@H]([C@@H](O)c1ccc(cc1)[N+](=O)[O-])C(=O)N[C@@H](Cc2ccccc2)C(=O)NO	388.138	0.188	-6.9	28	2	8	5	7
CHEMBL169637	NCCNc1ccc(NCCN)c2C(=O)c3c[n+]([O-])ccc3C(=O)c12	341.149	-0.163	-7.8	25	3	6	4	7
CHEMBL2385608	[NH4+].[NH4+].O[C@@H]1[C@H](O[C@H]([C@@H]1F)N2C=CC(=O)NC2=O)\C=C\P(=O)([O-])[O-]	356.09	-1.687	-1.2	23	2	3	4	8
CHEMBL2007791	CCc1c(CN)c(CC)c(CNC2=NCCN2)c(CC)c1CNC3=NCCN3	385.295	0.93	-6.5	28	3	8	5	7
CHEMBL1090232	OS(=O)(=O)c1ccccc1\C=N\NC(=O)N\N=C\c2ccccc2S(=O)(=O)O	426.03	0.847	-6.5	28	2	6	4	7
CHEMBL1321841	O.CC(C)(C)NCC1(CO)SC(=NC1=O)N.OS(=O)(=O)O	347.082	-1.784	-1.5	21	1	3	5	7
CHEMBL203938	CCCCNc1nc(N)c2nc(O)n(CC(C)(C)O)c2n1	294.18	1.097	-6.8	21	2	6	4	8
ZINC000001606866	Nc1nc(N)nc([C@H]2CC[C@@H]2c2nc(N)nc(N)n2)n1	274.14	-0.953	-6.9	20	3	2	4	10
CHEMBL4069700	N[C@@H](CCP(=O)(O)C(O)c1cc(cc(c1O)[N+](=O)[O-])[N+](=O)[O-])C(=O)O	379.042	0.272	-6.7	25	1	8	5	9
ZINC000534634876	CCCCc1nc(C)cc(=NCCNc2nc(N)[nH]c3ncnc2-3)[nH]1	341.208	1.274	-7.2	25	3	7	4	7
CHEMBL1468423	CC(C)(CO)NS(=O)(=O)c1ccc2c3ccc(cc3C(=NO)c2c1)S(=O)(=O)NC(C)(C)CO	497.129	0.992	-4.1	33	3	8	5	8
CHEMBL1962822	CCOC(=O)CCNc1nc(N)c(nc1Cl)C(=O)NC(=N)N	329.1	-0.299	-7.6	22	1	6	5	8
CHEMBL417659	OC1SC(C(O)C1O)N2C=C(Br)C(=O)NC2=O	323.942	-1.415	-6.6	17	2	1	4	7
ZINC000008627226	Nc1nc(O)c2c(n1)NCN(c1ccc(S(=O)(=O)O)cc1)C2	323.069	0.401	-6.3	22	3	2	4	8
CHEMBL3943738	CNC(C)C(=O)Nc1cc(cc(NC(=O)c2ccccn2)n1)c3nn(C)c4ncnc(N)c34	446.193	1.201	-7.3	33	4	6	4	10
CHEMBL3247594	NCCS[C@H]1O[C@H](CO)[C@@H](O)[C@H](O)[C@@H]1O	239.083	-2.522	-5.5	15	1	4	5	7
ZINC000072370078	O=C(O)c1cccc(/C=N/CC(O)C/N=C/c2cccc(C(=O)O)c2O)c1O	386.111	1.393	-7.5	28	2	8	5	7
ZINC000263605367	C[Sn](C)(n1cnc(=N)nc1O)n1cnc(=N)nc1O	372.011	-1.662		19	2	2	4	10
CHEMBL319348	C\C(=C\c1ccc(OCC=C)c(NS(=O)(=O)C)c1)\C(=O)N[C@@H]2[C@H](O)[C@@H](O)[C@H]3OCO[C@H]3[C@@H]2O	484.152	-0.651	-5.8	33	3	8	5	9
ZINC000253535342	CNc1cc(N[C@H]2C[C@@H](c3cc(O)nc(N(C)C)n3)C2)nc(N)n1	330.192	1.02	-7.2	24	3	5	4	9
CHEMBL1090111	CO[C@H]1OCC(C[C@H]1O)S[C@H]2O[C@H](CO)[C@@H](O)[C@H](O)[C@H]2NC(=O)C	367.13	-2.214	-7	24	2	5	5	9
ZINC000604971565	Nc1nc2[nH]c(OS(=O)(=O)O)nc2c(N)n1	246.017	-1.301	-6.1	16	2	2	4	8
CHEMBL3248282	C\C(=C\1/C(=C(C(=O)C)C(=O)OC1=O)O)\Nc2cc(O)c(O)c(O)c2	335.064	0.974	-6.3	24	2	3	5	9
CHEMBL3392250	Cc1cc(NN)nc(n1)c2ccncc2.CS(=O)(=O)O.CS(=O)(=O)O	393.078	0.141	-2.9	25	2	2	4	9
ZINC000952862856	CSC1=NC2=CC(=N[C@@H](Cc3ccccc3)C(=O)N[C@H](C(C)C)C(=O)N[C@@H](C)C(=O)NCC2)N1	484.226	1.368	-6	34	3	3	4	7
CHEMBL3426122	COC(=O)OC[C@@H](O)[C@@H](O)[C@@H]1O[C@](F)([C@H](F)[C@H](N)[C@H]1NC(=O)C)C(=O)OC	400.129	-2.101	-6.4	27	1	6	4	10
CHEMBL117391	C[N+](C)([O-])CCNc1ccc(NCC[N+](C)(C)[O-])c2C(=O)c3c(O)ccc(O)c3C(=O)c12	444.201	1.845	-6.7	32	3	8	4	8
CHEMBL89926	CC(O)CNc1nc(NCC(=O)N)nc2c1ncn2C	279.144	-0.947	-6.7	20	2	6	4	8
CHEMBL1192014	C\C(=N/NC1=NCCN1)\c2cccc(c2)\C(=N\NC3=NCCN3)\C	326.197	0.232	-6.8	24	3	4	4	8
CHEMBL504599	CCc1c(O)c(O)c2C(=O)C(=C(O)C(=O)c2c1O)N	265.059	0.473	-6.7	19	2	1	5	7
ZINC000016162585	CCc1nnc(N/N=C/c2cc(Br)c(O)c(Br)c2O)n1N	417.939	1.936	-6.6	21	2	4	4	8
CHEMBL1194733	CNCCNc1ccc(NCCNC)c2C(=O)c3cnccc3C(=O)c12	353.185	1.12	-7.4	26	3	8	4	7
CHEMBL3138483	[Na+].CC12CC(OS(=O)(=O)[O-])C(O)C(O)C1CCC3C2CCC4(C)C(C=C)C(O)C(O)C34	468.179	-2.436	-5.4	31	4	3	4	8
CHEMBL3392307	O.COc1cc(NCc2ccc3nc(N)nc(N)c3c2)cc(OC)c1OC.CC(=O)O	433.196	1.698	-1.6	31	3	6	4	9
ZINC000005750376	NC1=C2NN(c3ccc(C(=O)O)cc3)N=C2NN1	246.087	-0.742	-7.5	18	3	2	5	7
CHEMBL22683	CC(C)C[C@H](N)C(=O)Nc1nc2nc(N)nc(N)c2nc1c3ccccc3	366.192	1.563	-7.1	27	3	5	4	8
CHEMBL585558	OCCNCCNc1ccc(F)c2C(=O)c3c(O)ccc(O)c3C(=O)c12	360.112	1.006	-8.3	26	3	6	5	7
ZINC000095913658	COC(=O)CCc1ccc(OC)cc1O[C@@H]1O[C@H](CO)[C@@H](O)[C@H](O)[C@H]1O	372.142	-1.02	-7.3	26	2	7	4	9
CHEMBL3779919	CN(C)c1ccc(\C=N\NC(=N)N\N=C\c2ccc(cc2O)N(C)C)c(O)c1	383.207	1.712	-5.2	28	2	6	5	7
ZINC000253535077	Cc1nc(O)cc([C@H]2C[C@@H](Nc3cc(NCCO)ncn3)C2)n1	316.165	1.043	-7.1	23	3	6	4	8
CHEMBL3703816	CCn1cc2cc(Cc3cc(ccc3Cl)[C@@H]4O[C@H](CO)[C@@H](O)[C@H](O)[C@H]4O)ccc2n1	432.145	1.815	-8.2	30	4	5	4	7
CHEMBL411920	C[C@]1(CO)O[C@@H](n2cc(Br)c3c(N)ncnc23)[C@](C)(O)[C@]1(C)O	386.059	0.558	-6.4	23	3	2	4	8
ZINC000005604648	OC1=c2ccccc2=C(O)C12N=Nc1n[nH]c(=S)n1N2	288.043	0.324	-7.5	20	4	0	4	8
CHEMBL2028358	[Na+].Cc1cc(C)nc(NCCC(O)(P(=O)(O)O)P(=O)(O)[O-])n1	363.036	-3.731	-1.4	22	1	6	5	7
CHEMBL2006192	CC(=S)NC1C(O)C(O)C(CO)OC1Oc2ccc3C(=CC(=O)Oc3c2)C	395.104	0.225	-6.5	27	3	4	4	8
CHEMBL1934765	Nc1cc(Cn2c(C(=O)NS(=O)(=O)N)c(C3=CC=CNC3=O)c4cc(Cl)ccc24)ccn1	472.072	1.609	-7.7	32	4	5	4	7
CHEMBL3287015	CC(C)[C@H](NC(=O)c1csc(n1)c2cscn2)C(=O)NCC(=O)NO	383.072	0.643	-6.8	25	2	7	4	8
CHEMBL440950	Nc1nc(N)c(CCNc2cc(F)c(F)cc2[N+](=O)[O-])c(O)n1	326.094	1.188	-7	23	2	5	4	8
ZINC000102921292	CC1=C(NC(=O)/C(=N/NC(=S)NN)C2C(=O)CC(C)(C)CC2=O)C(=O)c2ccccc2C1=O	469.142	0.724	-8	33	3	4	4	8
CHEMBL3763929	OC[C@H]1O[C@@]2(CC(=NO2)c3ccc4OCOc4c3)[C@H](O)[C@@H](O)[C@@H]1O	339.095	-1.29	-7.5	24	4	2	4	9
CHEMBL77859	C(CNCCNC1=NCCN1)CNC2=NCCN2	253.201	-1.936	-5.4	18	2	7	5	7
CHEMBL1917470	OC[C@H]1O[C@H](OCc2cn(nn2)c3cccc(F)c3)[C@@H](O)[C@@H](O)[C@@H]1O	355.118	-1.277	-7.1	25	3	5	4	9
ZINC000101946584	C=C(C)CNC1=C(C(N)=O)C(=N)[C@@H](C(=O)Nc2sc3c(c2C(=O)OC)CCC3)S1	434.108	1.96	-7	29	3	7	4	8
ZINC000004595167	CCNc1nc(NCC)nc(N(C#N)C(=N)N)n1	249.145	-0.084	-6.8	18	1	5	4	7
CHEMBL157576	CCOC(=O)CCNC(=O)CC1CC(=NO1)c2ccc(cc2)C(=N)N.OC(=O)C(F)(F)F	460.157	1.556	-4	32	2	8	4	7
ZINC001772714963	CC(C)(C)OC(=O)NC(=N)NOCC[C@H](NC(=O)OC(C)(C)C)C(N)=O	375.212	0.736	-6.7	26	0	6	5	7
ZINC000004595166	CCNc1nc(NC(C)C)nc(N(C#N)C(=N)N)n1	263.161	0.305	-7.2	19	1	5	4	7
CHEMBL477717	COc1ccc2C=C(NC(=O)C3=NO[C@H]4[C@H](O)C=C[C@@H](O)[C@@]4(O)C3)C(=O)Oc2c1OC	432.117	-0.084	-6	31	4	4	4	10
ZINC000005683843	NC1=NN2C(=C(c3ccc(C(=O)O)cc3)NN2c2ccccc2)N1	322.118	1.086	-8	24	4	3	4	7
CHEMBL2136224	OC[C@H]1O[C@H]([C@H](O)[C@@H](O)[C@H]1O)c2nc(cs2)C(=O)NCc3cccs3	386.061	-0.351	-6.8	25	3	5	5	9
ZINC000095480920	O=c1cc(CO)oc(C(c2cccc(OC(F)F)c2)c2oc(CO)cc(=O)c2O)c1O	438.076	1.77	-7.8	31	3	7	4	9
CHEMBL3703813	Cn1ncc2cc(Cc3cc(ccc3Cl)[C@@H]4O[C@H](CO)[C@@H](O)[C@H](O)[C@H]4O)ccc12	418.13	1.332	-7.1	29	4	4	4	7
CHEMBL1909791	Cl.NC(=N)NC(=O)c1nc(Cl)c(NCC#N)nc1N	304.035	-0.307	-6.7	19	1	3	5	7
CHEMBL483881	COc1c(O)cc(O)c(\C(=N\O)\Cc2ccc(O)cc2)c1O	305.09	1.939	-6.5	22	2	4	5	7
ZINC000253535344	Cn1cc([C@H](NC(=O)Cc2cc(O)nc(N)n2)[C@H]2C[C@@H](O)C2)cn1	332.16	-0.331		24	3	5	4	8
CHEMBL1171651	CS(=O)(=O)Nc1cccc(c1)c2ccc(O[C@H]3O[C@H](CO)[C@@H](O)[C@H](O)[C@@H]3O)cc2	425.114	-0.096	-6.5	29	3	6	5	8
ZINC000013281761	Nc1cc(Nc2ccc(Cl)nc2S)nc(N)n1	268.03	1.722	-6.6	17	2	2	4	7
CHEMBL1909785	Cl.CCOP(=O)(CNc1nc(N)c(nc1Cl)C(=O)NC(=N)N)OCC	415.069	1.393	-6.6	25	1	8	5	9
ZINC000022056689	NC(N)=Nc1nc(C[S@@](=O)CCC(=O)NS(N)(=O)=O)cs1	354.024	-1.993	-6.6	21	1	7	4	7
ZINC000020467947	CC(C)(C)NC(=O)CSc1n[nH]c(N/N=C/c2ccc(O)cc2)n1	348.137	1.963	-7	24	2	6	4	7
ZINC000104368979	N=C(N/N=C\c1ccc2c(c1)OCO2)C(=N)N/N=C\c1ccc2c(c1)OCO2	380.123	1.646	-7.9	28	4	4	4	8
ZINC000016682862	CCOC(=O)CSc1[nH]c(NC(=S)NC(=O)c2ccccc2)c(C(N)=O)c1C(N)=O	449.083	0.994	-7	30	2	8	5	7
CHEMBL1201124	NC(CO)(CO)CO.OC(=O)C1CCn2c1ccc2C(=O)c3ccccc3	376.163	-0.048	-4	27	3	6	5	7
ZINC000071769630	Cc1c2ccc(Br)c(O)c2c(O)c2c1C[C@H]1CC(O)=C(C(N)=O)C(=O)[C@@]1(O)C2=O	461.011	1.678	-6.7	29	4	1	5	7
ZINC000223812019	O=C1NC(=S)NC(=O)C1C(c1cccnc1)C1C(=O)NC(=S)NC1=O	377.025	-1.541	-7.7	25	3	3	4	7
ZINC000017005388	N=C(N)SC[C@@H]1OCO[C@@H]1[C@@H]1OCO[C@@H]1CSC(=N)N	322.077	-0.277	-6.5	20	2	5	4	8
ZINC000009418345	COC(=O)c1[nH]c2cccc(OC)c2c1NC=C1C(=O)NC(=S)NC1=O	374.068	0.79	-6.9	26	3	4	4	7
CHEMBL1523639	OCC1(CO)COC(=O)C(=N1)NNc2ccccc2Cl	299.067	-0.065	-6.7	20	2	4	4	7
CHEMBL461750	O.Cc1nonc1CNC(C2CCNCC2)c3c[nH]cn3.OC(=O)C(F)(F)F	408.173	0.74	-1.6	28	3	5	4	7
CHEMBL226147	Nc1nc(N)c(c(CC[C@@H](O)[C@@H](O)CO)n1)c2ccccc2	304.154	-0.045	-6.9	22	2	6	5	7
CHEMBL1962989	N[C@@H](Cc1ccc(O)cc1)C(=O)N[C@H]2CC(=O)N(CC(=O)NO)C2=O	350.123	-1.989	-7	25	2	6	5	7
CHEMBL3654888	CN(C)c1ccc(Cc2cc([C@@H]3O[C@H](CO)[C@@H](O)[C@H](O)[C@H]3O)c4CCOc4c2Cl)cc1	449.161	1.447	-7.6	31	4	5	4	7
ZINC000100530765	O=C1NC(=S)NC(=O)C1C(c1ccc(Cl)c([N+](=O)[O-])c1)C1C(=O)NC(=S)NC1=O	454.976	-0.374	-7.5	29	3	4	4	8
ZINC000013724226	CCC(CO)(CO)NC(=O)C(=O)Nc1ccc2nsnc2c1	324.089	-0.121	-5.9	22	2	5	4	7
CHEMBL1199124	N\C(=N\O)\c1ccc(cn1)c2ncc(s2)c3ccc(nc3)\C(=N\O)\N	355.085	1.456	-6	25	3	4	4	8
CHEMBL300481	CC1(C)O[C@H]2C=CC(NCc3c[nH]c4nc(N)nc(S)c34)C2O1	333.126	1.377	-7.1	23	4	3	4	7
CHEMBL611292	NC(=S)c1nn(cp1)C2O[C@H](CO)[C@@H](O)[C@H]2O	277.029	-1.291	-5.9	17	2	3	4	7
ZINC000575422898	O=C(Nc1cnc(O)nc1O)N[C@H]1CCS(=O)(=O)C1	288.053	-0.804	-5.9	19	2	2	4	7
CHEMBL3806328	Nc1nc(NCC(=O)N[C@@H](Cc2ccccc2)C(=O)O)c3nc[nH]c3n1	355.139	0.159	-7.5	26	3	7	5	7
CHEMBL1909801	Cl.CCN(CC)CCNc1nc(N)c(nc1Cl)C(=O)NC(=N)N	364.129	0.511	-6.3	23	1	7	5	7
ZINC001560411813	CC(C)/C(N)=C(/[O])OC[C@H](CO)OCn1cnc2c1nc(N)nc2O	353.157	-0.32	-6.4	25	2	8	4	10
CHEMBL2097111	Nc1ccc(cc1)C(=O)O.Nc2nc(N)c3nc[nH]c3n2	287.113	0.484	-4.8	21	3	1	5	7
ZINC001570006802	CC1=C[C@]2(C(=O)CO)C(=CC(=O)C3=C[C@H](C)[C@H](O)C[C@]32C)C2=C1C1=C(OCN1)[C@H]2O	411.168	0.797	-5.8	30	5	2	4	7
CHEMBL3276787	C\C(=N/OCC(O)CNC(C)(C)C)\c1ccc(cc1)C#N.OC(=O)C(=O)O	379.174	1.203	-6	27	1	6	4	7
CHEMBL2359737	OC[C@H]1O[C@H]([C@H](O)[C@@H](O)[C@H]1O)c2nc(cs2)C(=O)Nc3cccc(c3)C(F)(F)F	434.076	0.929	-7.5	29	3	4	5	8
CHEMBL20368	CC1(C)N=C(N)N=C(N)N1c2cccc(CNc3cc(cc(c3)C(=O)N)C(=O)N)c2	408.202	0.682	-8	30	3	6	5	8
ZINC000016431090	OC[C@H](O)[C@H](O)[C@@H](O)c1nnc2ccc(C(F)(F)F)cc2n1	319.078	-0.209	-7	22	2	4	4	7
CHEMBL487616	CON1C(=O)[C@@H](O[C@@H]2O[C@H](CO)[C@@H](O)[C@H](O)[C@H]2O)Oc3cc(OC)ccc13	387.117	-1.875	-7	27	3	5	4	10
ZINC000016188738	CN(c1ccc(C=C2C(=O)NC(=O)NC2=O)cc1)c1ccc(C=C2C(=O)NC(=O)NC2=O)cc1	459.118	0.953	-4.7	34	4	4	4	7
CHEMBL1967455	Nc1nc(Cl)c(\C=N/O)c(NCC2(CO)CC(=O)C2)n1	299.079	0.274	-6.4	20	2	5	4	8
ZINC000136481075	O=C(O)[C@@H](c1ccc(O)cc1)N1C[C@H](NC(=O)C(NO)=C2C=CC(=O)C=C2)C1=O	399.107	-0.227	-7.3	29	3	6	5	7
CHEMBL133039	[Na+].COc1ccc(CCC(=N)c2c(O)cc(OCC(=O)[O-])cc2O)cc1O	383.098	-2.055	-7.6	27	2	8	4	8
ZINC000148210840	Nc1nc(/C(=N/O)C(=O)NCC(=O)O)cs1	244.027	-0.896	-5.6	16	1	4	4	7
CHEMBL3326444	CON(CC1=CC[C@H](CC1)C(=C)C)[C@@H]2O[C@H](CO)[C@@H](O)[C@H](O)[C@H]2NC(=O)N(C)N=O	428.227	0.283	-7	30	2	8	4	9
CHEMBL1159472	OC[C@H]1OC(Oc2ccc(cc2)[N+]#N)[C@H](O)[C@@H](O)[C@@H]1O.[O-]C(=O)C(F)(F)F	396.078	-1.352	-6.9	27	2	3	4	9
ZINC000001005488	CC(=O)Nc1ccc(N2C(=O)c3cccc4c(NC(CO)(CO)CO)ccc(c43)C2=O)cc1	449.159	1.726	-7.7	33	4	7	5	7
CHEMBL4079665	NC1=NC(Nc2ccc(cc2)S(=O)(=O)N)NN1C(=S)Nc3c(F)cccc3F	427.07	0.84	-7.4	28	3	4	5	7
CHEMBL1978231	NN1C(=O)C(CCO)S/C/1=N/N=C\2/SC(CCO)C(=O)N2N	348.067	-1.986	-6.1	22	2	5	4	10
ZINC000033599938	S=C(N/N=C/c1cccnc1)NN1CCN(NC(=S)N/N=C\c2cccnc2)CC1	442.147	0.22	-6.8	30	3	6	4	8
ZINC000000517422	Nc1ncnc2[nH]c(SC[C@@H](O)CO)nc21	241.063	-0.62	-6	16	2	4	4	7
CHEMBL3327047	O[C@H]1C=C[C@H](O)[C@@H]2[C@@H]1C[C@@]34SS[C@]5(C[C@@H]6[C@@H](O)C=C[C@H](O)[C@H]6N5C3=O)C(=O)N24	424.076	-1.195	-6.1	28	7	0	4	8
CHEMBL3221805	O[C@@H]1C[C@@](O)(C=C([C@H]1O)c2cn(Cc3cccs3)nn2)C(=O)O	337.073	-0.288	-6.6	23	3	4	4	8
CHEMBL2005148	Sc1nnc([nH]1)c2ccnc(c2)c3nnc(S)[nH]3	277.02	1.229	-6.4	18	3	2	4	7
ZINC000000550293	C[C@H]1CCCc2sc3nc(NN)nc(NN)c3c21	264.116	1.702	-6.7	18	3	2	4	7
CHEMBL2443235	OC1=CC(=C(NC1=O)c2ccc(cc2)c3nnn[nH]3)c4ccc(cc4)c5nnn[nH]5	399.119	1.775	-8.5	30	5	4	4	8
CHEMBL3833404	CC(=O)Oc1ccccc1C(=O)O.CC(=O)Oc2ccccc2C(=O)O.NC(=O)N	420.117	1.644	-3	30	2	4	4	7
CHEMBL3287019	CC(C)[C@H](NC(=O)c1csc(n1)c2csc(C)n2)C(=O)NCCC(=O)NO	411.103	1.341	-6.5	27	2	8	4	8
CHEMBL3934897	NC(=O)[C@@H](O)CNc1cc(nc(n1)c2ccc(Oc3ccc(F)cc3)cc2)C(=O)N	411.134	1.432	-7.5	30	3	8	4	7
CHEMBL1597979	CCNc1nc(NCC)nc(n1)C(=O)NN	225.134	-0.661	-6.3	16	1	5	4	7
ZINC000334160481	N=c1[nH]cc(-c2nonc2-c2c[nH]c(=N)s2)s1	266.004	1.142	-6	17	3	2	4	7
ZINC000534584515	CC(C)N=c1cc(-c2ccc(C(=O)NCc3nn[nH]n3)cc2)nc(N)[nH]1	353.171	0.411	-7.5	26	3	5	4	7
CHEMBL2001230	Nc1nc(Cl)c(\C=N/O)c(NCC2(CO)CCC2)n1	285.099	1.095	-5.9	19	2	5	4	7
ZINC001772591455	COc1ccc(/C=C2\NC(=O)[C@@]34C[C@@]5(O)[C@@H](O)C=C[C@@H](S3)[C@H]5ON4C2=O)c(O)c1OC	448.094	-0.114	-5.8	31	6	3	4	9
ZINC000222823292	Nc1nc(NCc2ccc(S(N)(=O)=O)cc2)cc(C2CC(N)C2)n1	348.137	0.523	-7	24	3	5	4	7
CHEMBL3703838	OC[C@H]1O[C@H]([C@H](O)[C@@H](O)[C@@H]1O)c2ccc(Cl)c(Cc3ccc4OCCS(=O)(=O)c4c3)c2	470.08	0.612	-8	31	4	4	4	8
CHEMBL1253723	Nc1ccc(S[C@@H]2O[C@@H]([C@H](O)CO)[C@H](O)[C@H]2O)cc1	287.083	-0.839	-6.5	19	2	4	5	7
CHEMBL1608352	CCCN1[C@@H](C[C@@]2(O)[C@@H](O)[C@@H](O)[C@@H](O)C[C@@H]12)C(=O)OC	289.153	-1.77	-6.8	20	2	3	4	7
CHEMBL1207388	O[C@H]1[C@H](O)[C@H]2[C@@H](NC(=O)c3c(O)c4OCOc4cc23)[C@@H]5OP(=O)(O)O[C@H]15	387.036	-1.064	-7.8	26	5	0	5	9
CHEMBL1964511	C\C(=N/NC(=O)N)\c1sc(nc1C)c2nc(C)c(s2)\C(=N\NC(=O)N)\C	394.099	1.668	-5.2	26	2	5	4	8
CHEMBL1193461	COc1cc(cc(OC)c1O)[C@H]2[C@@H]3[C@H](COC3=O)[C@H](NC(=O)NO)c4cc5OCOc5cc24	458.133	1.802	-6.4	33	5	4	4	9
ZINC000091550616	CCCCc1c(C)nc(N)nc1NCc1n[nH]c(N)n1	276.181	1.022	-6.5	20	2	6	4	7
CHEMBL462045	CN1C(=O)C(=C(N=C1C(C)(C)NC(=O)c2c[nH]cn2)C(=O)NCc3ccc(F)cc3)O	428.161	0.943	-8.1	31	3	6	4	7
CHEMBL3221800	O[C@@H]1C[C@@](O)(C=C([C@H]1O)c2cn(nn2)c3cccc(c3)[N+](=O)[O-])C(=O)O	362.086	-0.5	-6.5	26	3	4	4	9
CHEMBL3690010	Cc1ncc(NC(=O)c2nc(cnc2Nc3cncnc3)C4CC4)c(n1)C(=O)NCC(C)(C)O	463.208	1.739	-7	34	4	8	4	10
ZINC000044922118	CCC(CO)(CO)NC(=O)C(=O)Nc1ccc(-c2nnc(C)o2)cc1	348.143	0.233	-7	25	2	6	4	7
ZINC000217878099	CCOC(=O)c1c[nH]c(=O)c([C@@H](CC(=O)O)c2cc(OC)c(O)c(OC)c2)c1O	407.122	1.587	-7.5	29	2	8	4	8
CHEMBL2112704	C[C@]1(Oc2ccc(N)cc2[C@H](\N=C(\NCc3ccccc3)/NC#N)[C@@H]1O)C4OCCO4	423.191	1.411	-6.8	31	4	4	4	7
CHEMBL1207988	CO[C@H]1O[C@H](\C=C\S(=O)(=O)O)[C@@H](O)[C@H](O)[C@@H]1O	270.041	-2.158	-6.3	17	1	3	4	7
CHEMBL3608320	NOS(=O)(=O)NC1O[C@H](CO)[C@@H](O)C=C1	240.042	-2.655	-5.2	15	1	4	4	7
ZINC000253535609	Nc1nc2[nH]ncc2c(N[C@H]2C[C@@H](c3cc(O)nc(C4CC4)n3)C2)n1	338.16	1.666	-7.2	25	5	4	4	8
ZINC000103769523	N#Cc1ccc(-c2cccs2)nc1SCC1=C[C@H](O)N[C@@H](O)N1	346.056	1.445	-7.1	23	3	4	4	8
ZINC000017216047	COC(=O)/C(=N/NC(=S)NN)[C@@H](C(=O)OC)C(=O)C(=O)Nc1cccc(C(F)(F)F)c1	463.077	-0.131	-6.5	31	1	7	4	9
CHEMBL1490172	Nc1c(cnc2nnnn12)C(=O)Nc3ccc(cc3)[As](=O)(O)O	379.001	-2.085		23	3	3	4	8
CHEMBL281494	CN(Cc1cnc2nc(N)nc(N)c2n1)c3ccc(cc3)C(=O)NCS(=O)(=O)O	418.117	-0.204	-6.6	29	3	6	4	10
ZINC000073634460	Nc1cc(N)cc(-c2nnc(-c3cc(N)cc(N)c3)o2)c1	282.123	1.732	-6.8	21	3	2	4	7
CHEMBL3236835	CC(=O)O[C@H](COP(=O)(O)O)[C@@H](O)C(=O)NO	273.025	-2.106	-5.8	17	0	6	5	7
ZINC000103768494	CC(=N/O)/C(=N\O)C(=N\O)/C(C)=N\O	202.07	0.347	-5.7	14	0	3	4	8
ZINC000033728452	CCOC(=O)C1=C(C)N=C(NN)N[C@@H]1c1ccc(O)c(OC)c1	320.148	0.702	-6.6	23	2	4	4	8
ZINC000013403331	CNc1nnc(SCC(=O)N[C@@H](Cc2c[nH]c3ccccc23)C(=O)O)s1	391.077	1.965	-6.7	26	3	8	4	7
CHEMBL34770	NS(=O)(=O)c1nnc(NC(=O)CNCC(=O)O)s1	295.005	-2.202	-5.8	18	1	6	4	8
CHEMBL1886140	C[C@H](CC[C@@H](C)O[C@H]1OC(C)[C@@H](O)C[C@H]1O)O[C@@H]2OC(C)[C@H](O)CC2O	378.225	0.29	-6.4	26	2	7	4	8
CHEMBL2018050	Nc1nc(Cl)c(c(N[C@@H]2C[C@H](CO)[C@@H](O)[C@H]2O)n1)c3nccs3	357.066	0.35	-6.7	23	3	4	5	9
CHEMBL3140289	OC[C@H]1O[C@@H](S\C(=N/OS(=O)(=O)O)\c2ccc(Br)cc2)[C@H](O)[C@@H](O)[C@@H]1O	472.945	-0.537	-7.5	26	2	5	5	10
CHEMBL145474	Nc1ncnc2c1ncn2\C=C\3/CC3COP(=O)(O)P(=O)(O)P(=O)(O)O	425.006	0.749	-6.6	26	3	6	5	9
CHEMBL61469	OC(=O)CC(NC(=O)c1ccc(\C=C\C(=O)NC2=NCCCN2)s1)c3ccc4OCOc4c3	470.126	1.901	-4.8	33	4	7	4	8
CHEMBL2018089	Cn1c(Cc2cccc(c2)[C@@H]3O[C@H](CO)[C@@H](O)[C@H](O)[C@H]3O)nc4ccccc14	384.169	0.679	-7.3	28	4	4	4	7
CHEMBL3392249	CCC(CC)NC(=O)Nc1ccnc(n1)c2ccncc2.CS(=O)(=O)O.CS(=O)(=O)O	477.135	1.857	-2.9	31	2	5	4	8
CHEMBL1985758	Br.C1CNOCCCONCCCNOCCCONC1	372.137	0.223	-6.2	21	1	0	4	8
CHEMBL88564	OCCNc1ccc(NCCO)c2C(=O)c3sccc3C(=O)c12	332.083	1.332	-7	23	3	6	4	7
CHEMBL3805444	O.COC(=O)[C@H](C)NC(=O)CNc1nc(NC(=O)C)nc2[nH]cnc12	353.145	-1.424	-1.6	25	2	6	4	8
ZINC000016887211	CCNc1nc(N)nc(OCCNC(=O)Nc2cccc(Cl)c2)n1	351.121	1.739	-7.3	24	2	7	4	7
CHEMBL2074700	CCC(C)C(NC(=O)c1ccc(cc1)N(C)Cc2cnc3nc(N)nc(N)c3n2)C(=O)O	438.213	1.45	-6.9	32	3	8	4	9
CHEMBL300031	CNC(=O)OCc1c(COC(=O)NC)n(C)c2C(=C(C)C(=N)C(=O)c12)O	364.138	1.242	-7.5	26	2	4	4	8
CHEMBL3303476	CC(NC(=O)c1ccc(cc1)N(C)Cc2cnc3nc(N)nc(N)c3n2)C(=O)O	396.166	0.424	-6.9	29	3	6	4	9
ZINC000003954314	Nc1c(S(=O)(=O)O)cc(Nc2cccc(S(N)(=O)=O)c2)c2c1C(=O)c1ccccc1C2=O	473.035	1.682	-7.7	32	4	4	4	8
ZINC000072312189	COc1nc(NCC(=O)NC(C)(C)C)nc(NCC(=O)NC(C)(C)C)n1	367.233	0.533	-6.2	26	1	7	4	8
CHEMBL1741544	Oc1ncc(CS(=O)(=O)Cc2cnc(O)nc2O)c(O)n1	314.032	-0.796	-6.7	21	2	4	4	10
ZINC000003150912	N=C(N/N=C/c1cc(Br)cc([N+](=O)[O-])c1O)c1nonc1N	368.982	0.977	-6.9	22	2	4	4	9
CHEMBL475140	NC(=O)N1Cc2c(O)c3OCOc3cc2C4=C[C@H](O)[C@@H](O)[C@@H](O)[C@H]14	336.096	-1.137	-8	24	4	0	5	7
CHEMBL264637	ONC(=O)N\N=C\c1cc(cc(c1O)[N+](=O)[O-])[N+](=O)[O-]	285.035	0.231	-6.9	20	1	4	4	8
CHEMBL1096145	Oc1ccc(\C=C(/C#N)\C(=O)NCCCNC(=O)\C(=C\c2ccc(O)c(O)c2)\C#N)cc1	432.143	1.94	-6.7	32	2	8	5	7
CHEMBL2107142	Cn1cccc1C(=O)C(C#N)C(=O)Nc2ccccc2.NC(CO)(CO)CO	388.175	-0.353	-6.9	28	2	7	5	8
CHEMBL1642665	Nc1nc(SCCCCC(O)O)c2nc[nH]c2n1	269.095	0.508	-6.1	18	2	6	4	7
ZINC000040266417	CCC(CO)(CO)NC(=O)c1nc(CC(=O)Nc2cc(C)on2)no1	353.134	-0.59	-6.4	25	2	8	4	9
ZINC000004265700	O=C(O)c1cc(NC(=O)c2cc([N+](=O)[O-])cc(S(=O)(=O)O)c2)cc(S(=O)(=O)O)c1	445.973	1.039	-5.3	29	2	6	4	8
CHEMBL4101796	N[C@@H](CCP(=O)(O)C(O)c1cnc(N)s1)C(=O)O	295.039	-0.211	-5.8	18	1	6	5	7
CHEMBL33341	O[C@@H]1C[C@](O)(C[C@@H](OC(=O)\C=C\c2ccsc2)[C@@H]1O)C(=O)O	328.062	0.004	-6.3	22	2	4	4	7
CHEMBL3426123	COC(=O)[C@]1(F)O[C@@H]([C@H](O)[C@H](O)COC(=O)OC(C)C)[C@H](NC(=O)C)[C@@H](N)[C@H]1F	428.161	-1.322	-6.7	29	1	7	4	10
CHEMBL3303058	C\C(=C/1\C(=O)OC(=O)C(=C1O)C(=O)C)\Nc2cc(N)cc(O)c2	318.085	1.145	-6.7	23	2	3	4	8
CHEMBL1254519	OC[C@@H](O)[C@@H]1O[C@@H](Sc2ccc(cc2)[N+](=O)[O-])[C@H](O)[C@H]1O	317.057	-0.513	-6.1	21	2	5	4	8
CHEMBL4059764	COc1cccc(c1)N2C(O[C@@H]3O[C@H](CO)[C@@H](O)[C@H](O)[C@H]3O)C(OC2=O)c4ccc(F)cc4	465.144	0.675	-7.9	33	4	6	4	9
CHEMBL280929	CC1OC(OC2CCCCC2OC(=O)N3CCC(CC3)(C(=O)O)C(=O)O)C(O)C(O)C1O	461.19	-0.47	-6	32	3	5	5	9
CHEMBL1852193	CCOc1onc(c1)c2nc(c[nH]2)[C@@H](O)[C@H](O)[C@H](O)CO	299.112	-0.789	-6.8	21	2	7	5	8
CHEMBL478850	OC1=C(Oc2c(CN3CCOCC3)c(O)cc(O)c2C1=O)c4ccc(O)c(O)c4	401.111	1.82	-7.5	29	4	3	5	9
CHEMBL3302155	COc1cccc2C(=O)c3c(O)c4C[C@](O)(C[C@H](SCCN)c4c(O)c3C(=O)c12)C(=O)C	457.12	1.881	-6.6	32	4	5	4	9
CHEMBL59423	NC(=O)[C@H](Cc1cccs1)NC(=O)[C@H](CS)NC(=O)c2ccc3[nH]nnc3c2	418.088	0.26	-6.5	28	3	8	5	7
ZINC000015106301	CSCCc1[nH]c(NC(=O)CSc2nc(N)n[nH]2)c(C#N)c1C	351.094	1.531	-6	23	2	7	4	7
CHEMBL2398599	CC(=O)c1cnc(N[C@H]2O[C@H](CO)[C@@H](O)[C@H](O)[C@@H]2O)s1	304.073	-1.443	-6.4	20	2	4	5	9
ZINC000253535520	NC(=O)c1cccnc1N[C@H]1C[C@@H](c2cc(O)nc(N)n2)C1	300.133	0.616	-6.8	22	3	4	4	7
ZINC000008653118	COC(=O)c1nc(N)[nH]c(=O)c1CCCCCc1c(C(=O)OC)nc(N)[nH]c1=O	406.16	-0.454	-6.5	29	2	8	4	10
CHEMBL1206766	C[C@]1(COC(=O)Cc2ccc(O)c(O)c2)[C@@H](N3C(\C(=C/C(=O)O)\C3=O)S1(=O)=O)C(=O)O	455.052	-0.997	-7.6	31	3	6	4	9
ZINC000006828397	Nn1cnnc1N/N=C/c1cc(Br)c(O)cc1O	311.997	0.612	-6.4	18	2	3	4	8
CHEMBL462818	O[C@H]1C=C2[C@@H](NC(=O)c3c(O)c4OCOc4cc23)[C@@H]5OP(=O)(O)O[C@H]15.c6c[nH]cn6	437.062	0.285	-2.8	30	6	0	5	9
CHEMBL74212	C(CNC1=NCCN1)NCCNC2=NCCN2	239.186	-2.326	-5.3	17	2	6	5	7
ZINC000004478078	NC(=O)c1nc[nH]c1N/N=C1\C(N)=NN=C1O	236.077	-1.481	-6.2	17	2	3	5	7
ZINC000070655779	C[C@@H](O)CNc1nc2n[nH]nc2c(Nc2ccc(F)cc2)n1	303.124	1.423	-7	22	3	5	4	7
CHEMBL374789	N[C@@H]1C[C@H](N)CN(C1)c2nc(Nc3ccc(F)cc3)nc(n2)N4C[C@H](N)C[C@H](N)C4	416.256	-0.516	-8.3	30	4	4	5	10
CHEMBL3109642	CC1=C[C@H](N2C[C@@H]1N(OS(=O)(=O)O)C2=O)C(=O)NCC3=CC(=O)C(=CN3)O	400.069	-1.134	-7.5	27	3	5	4	7
CHEMBL1201135	O[C@H]([C@@H](O)C(=O)O)C(=O)O.C1NCC2CC1c3cc4nccnc4cc23	361.127	-0.319	-5.1	26	4	3	5	7
CHEMBL602554	OC[C@H]1O[C@H]([C@H](O)[C@@H](O)[C@@H]1O)c2ccc(Cl)c(Cc3nnc(s3)C(F)(F)F)c2	440.042	1.316	-7.3	28	3	4	4	8
CHEMBL3910424	Nc1ccc(cc1)S(=O)(=O)Nc2ccc(cc2)S(=O)(=O)Nc3nnc(s3)S(=O)(=O)N	489.986	0.369	-7.3	30	3	7	4	10
ZINC000004707115	Nc1nc(N)c(N=O)c(Nc2ccc(CCO)cc2)n1	274.118	1.317	-6.6	20	2	5	4	8
CHEMBL1835344	Cl.NCC(=O)N1CC2(C[C@H]1C(=O)NCCCCCC(=O)NO)SCCS2	426.116	0.326	-6.7	26	2	8	4	7
CHEMBL308030	CSC1OC(C(NC(=O)[C@@H]2CCN2)C(C)Cl)C(O)C(O)C1O	354.102	-1.369	-6.4	22	2	5	5	7
ZINC000100299945	O=S(=O)(O)c1ccc2c(c1)[C@H](S(=O)(=O)O)CC(=N\O)/C2=N/O	349.988	0.274	-7.3	22	2	2	4	8
CHEMBL376029	CN(C)c1nc(nc(n1)N2C[C@H](N)C[C@H](N)C2)N3C[C@H](N)C[C@H](N)C3	350.265	-2.333	-7.3	25	3	3	4	10
CHEMBL28224	NC1=NC(=O)N(C=C1)C2SC(O)C(O)C2O	245.047	-1.889	-5.8	16	2	1	4	8
CHEMBL2159356	OC1O[C@H](COC\C=C\n2ccnc2[N+](=O)[O-])[C@@H](O)[C@H](O)[C@H]1O	331.102	-1.921	-6.8	23	2	6	4	10
ZINC000008382970	COc1cc(C(c2c(N)nc(SC)[nH]c2=O)c2c(N)nc(SC)[nH]c2=O)ccc1O	448.099	1.356	-7.2	30	3	6	5	10
CHEMBL1802104	Cl.OC[C@@H](O)[C@@H](O)[C@H](O)c1c[nH]c(n1)c2cc(on2)C3CC3	331.093	0.111	-6.4	22	3	6	5	7
CHEMBL2147118	CCC(C)C(NC1=C(N=O)C(=O)NC(=N1)N)C(=O)O	269.112	0.661	-6.1	19	1	6	4	7
CHEMBL470077	CC(=O)c1c(O)c(C)c(O)c2c1OC3=CC(=O)\C(=C(\C)/NCCCCN)\C(=O)[C@]23C	414.179	1.897	-5.8	30	3	6	4	8
CHEMBL1733061	CC1=C(O)C(=C(C(=O)C1=O)C2=C(O)C(=C(C)C(=O)C2=O)O)O	306.038	0.578	-6.6	22	2	1	4	8
CHEMBL3249313	N[C@@H](C(=O)N[C@H]1[C@H]2SCC(=C(N2C1=O)C(=O)O)Cc3cncc(c3)C(=O)O)c4ccccc4	468.11	0.761	-6.9	33	4	7	4	7
CHEMBL606296	C[C@H]1OC([C@H](O)[C@@H]1O)n2cnc3c(nc(N)nc23)[S+](N)[O-]	314.08	-1.971	-6.8	21	3	2	4	10
ZINC000009322763	Nc1cc(N)nc(SCC(=O)NC(=O)NCC(F)(F)F)n1	324.062	0.121		21	1	4	4	7
CHEMBL170469	CC1(C)OCC2=NN(C(=C(C#N)C2=C1)N)c3ccccc3.OC(CS)C(O)CS	434.145	1.859	-6.9	29	3	4	5	9
ZINC000027546109	C=CCNC(=S)NNc1nc(NC(C)C)nc(NC(C)C)n1	324.184	1.489	-6.7	22	1	8	5	7
ZINC000016214102	CSc1nc(O)c(C(c2ccc(C(=O)O)cc2)c2c(O)nc(SC)[nH]c2=O)c(=O)[nH]1	448.051	1.587	-7.3	30	3	6	5	9
ZINC000020465311	COC[C@H]1CCCN1[C@H]1[C@@H](CNC(=O)Nc2ccsc2)O[C@@H](CO)[C@H]1O	385.167	0.47	-5.9	26	3	7	4	7
CHEMBL4082172	NC(CO)(CO)CO.OC(=O)CCc1noc2ccc(Cl)cc12	346.093	0.159	-4	23	2	6	5	7
CHEMBL2106925	Cl.CC(C)(C)NCC(O)COc1ccccc1c2ccc(NN)nn2	367.178	1.979	-6.6	25	2	7	4	7
CHEMBL332925	CCOCn1c(N)c(C(=N)S)c2c(N)ncnc12	266.095	0.845	-6	18	2	4	4	7
CHEMBL1223893	CSC(=O)NCc1ccc(O[C@@H]2O[C@@H](C)[C@H](O)[C@@H](O)[C@H]2O)cc1	343.109	0.465	-6.8	23	2	4	4	7
CHEMBL427350	NC(=N)N\N=C\c1c(nc2sccn12)c3ccc(O)c(O)c3	316.074	1.291	-7.5	22	3	3	5	7
ZINC000408721051	O=C1NC(=O)C(=NN=c2[nH]c3nonc3[nH]c2=Nc2ccc(Br)cc2)C(=O)N1	444.988	-0.503	-8.4	28	4	2	4	9
CHEMBL1967008	NNc1oc(nn1)c2oc(NN)nn2	198.061	-1.309	-5.9	14	2	3	4	10
ZINC000828767782	CN1CCC[C@@H](CCNc2cc(NCCO)nc(N)n2)C1	294.217	0.607	-6.3	21	2	7	4	7
CHEMBL554460	Br.CC[C@H](NCc1cc(cc2nc(O)c(O)nc12)[N+](=O)[O-])C(=O)O	402.017	1.48	-6.8	24	2	6	4	8
CHEMBL520964	OC[C@@H](O)[C@@H](O)[C@H](O)c1c[nH]c(n1)c2nocn2	256.081	-1.793	-6	18	2	5	5	8
CHEMBL4110658	CCNc1cc(ncc1C(=O)NC[C@@H](F)C(C)(C)O)n2ccc3cc(cnc23)C(=O)N	428.197	1.79	-6.6	31	3	8	4	7
CHEMBL3763810	COc1ccc2cc(ccc2c1)C3=NO[C@@]4(C3)O[C@H](CO)[C@@H](O)[C@H](O)[C@H]4O	375.132	0.143	-7.6	27	4	3	4	8
CHEMBL4077444	COc1ccc2C=C(NC(=O)[C@]34C[C@]5(O)[C@H](S3)C=C[C@@H](O)[C@@H]5ON4)C(=O)Oc2c1OC	448.094	0.516		31	5	4	4	10
CHEMBL3697000	CNc1ccc(cc1)c2ccc(cc2)C(=O)N(C)C(C(=O)NO)C(=O)NCc3cc(C)on3	451.186	1.954	-4.2	33	3	8	4	7
CHEMBL238757	CN(C)CCNC(=O)c1cc2C(=O)c3ccsc3C(=O)c2s1.OP(=O)(O)O	432.021	0.948	-3	27	3	4	4	7
CHEMBL1812601	N[C@@H](CN1C(=O)N(Cc2ccsc2P(=O)(O)O)C(=O)c3sccc13)C(=O)O	431.001	-0.451	-5	27	3	6	4	9
ZINC000103032100	CC(=O)c1c2c(c(O)c(C)c1O)[C@]1(C)C(=CC(=O)/C(=C(/C)NCC(=O)O)C1=O)O2	401.111	1.243	-4.5	29	3	4	4	8
ZINC000002026809	O=C(O)c1nccnc1C(=O)Nc1ccc(NC(=O)c2nccnc2C(=O)O)cc1	408.082	1.168	-1.9	30	3	6	4	8
CHEMBL1272272	COC(OC)[C@@]1(C)Oc2ccc(N)cc2[C@@H](N\C(=N\Cc3ccccc3)\NC#N)[C@@H]1O	425.206	1.657	-2.3	31	3	6	4	7
ZINC001704339349	Cc1cc(C[C@@H]2CN(Cc3nc(N)nc(Nc4cccc(C)c4)n3)C[C@H]2O)n[nH]1	394.223	1.573	-6.7	29	4	6	4	8
CHEMBL4097786	Nc1ncn(n1)C(=O)Nc2ccc(cc2)c3ccc(NC(=O)n4cnc(N)n4)cc3	404.146	1.861	-1.5	30	4	3	4	10
CHEMBL215381	O[C@H]1[C@@H](O)[C@@H](O[C@@H]1COP(=O)(O)O)N2C=CC(=O)N(CC(=O)c3ccccc3)C2=O	442.078	-1.379	-5.4	30	3	7	4	10
CHEMBL239416	OC[C@@H]1O[C@@H](SC2CCCCC2)[C@@H](NC(=O)C3CCOC(=N3)c4cccc(F)c4)[C@H](O)[C@H]1O	482.189	1.351	-4.8	33	4	6	4	8
CHEMBL48497	NC(=N)c1cccc(Oc2c[n+]([O-])cc(Oc3cccc(n3)C(=N)N)n2)c1	365.124	1.263	-7.8	27	3	6	4	7
CHEMBL2207702	C[C@@]1(O)C[C@H](O)c2c(O)c3C(=O)C=C(NCc4ccccc4)C(=O)c3c(O)c2C1	395.137	1.881	-4	29	4	3	5	7
CHEMBL577738	CCNNC1=C(Nc2cccc(C(=O)N(C)C)c2O)C(=O)C1=O	318.133	0.37	-6	23	2	6	4	7
CHEMBL1712863	COc1ccc(OC)c(Cc2cnc3nc(N)nc(N)c3c2C)c1.OCCS(=O)(=O)O	451.153	0.972	-3.7	31	3	6	4	10
CHEMBL3198346	Nc1nc(N)nc(n1)c2cc(Cl)ccc2Cl.OC(=O)C=CC(=O)O	371.019	1.722	-4.3	24	2	3	4	7
CHEMBL221142	CN[C@@H]1[C@H](O)CO[C@@H]2C[C@@](C[C@H](N)C(=O)O)(O[C@H]12)C(=O)O	304.127	-2.252	-5.4	21	2	5	5	7
ZINC000077312613	C[C@@H](CN1c2ccccc2Sc2ccccc21)[N+](C)(C)[C@@H]1O[C@H](C(=O)O)[C@@H](O)[C@H](O)[C@H]1O	461.174	1.646	-3	32	4	5	4	7
CHEMBL74555	C(CNCCCNC1=NCCN1)CNC2=NCCN2	267.217	-1.546	-5.5	19	2	8	5	7
CHEMBL298317	COC(=O)[C@H](CO)NC(=O)[C@@H](NC(=O)[C@@H](N)CS)C(C)C	321.136	-1.966	-5.2	21	0	8	5	7
CHEMBL3426124	COC(=O)[C@]1(F)O[C@@H]([C@H](O)[C@H](O)COC(=O)OCC(C)(C)C)[C@H](NC(=O)C)[C@@H](N)[C@H]1F	456.192	-0.685	-4.7	31	1	7	4	10
CHEMBL2092925	C\C(=C/c1coc2nc(N)nc(N)c12)\c3ccc(cc3)C(=O)N[C@@H](CCC(=O)O)C(=O)O	439.149	1.996	-0.1	32	3	8	5	8
CHEMBL596460	CNc1ncnc2c1ncn2[C@@H]3S[C@@H]([C@@H](O)[C@H]3O)C(=O)NC4CC4	350.116	-0.518	-5.8	24	4	4	4	9
ZINC000253531896	CCOc1cc(C=c2nc(O)c(=Cc3ccc(O)c(OCC)c3)nc2O)ccc1O	410.148	1.754	-2.3	30	3	6	4	8
CHEMBL3902965	CN(C)CCNC(=O)c1ccc(s1)c2cc(NC3CC3)n4ncc(\C=C\5/NC(=O)NC5=O)c4n2	480.169	1.504	-3.2	34	5	8	4	9
ZINC000095461270	COC(=O)c1sccc1NC(=O)C(=O)NCCCc1n[nH]c(N)c1C#N	376.095	0.399	-5.9	26	2	6	4	8
CHEMBL1941147	Cl.NCCCC[C@H](N)C(=O)N[C@H]1CC(=O)N(CC(=O)NO)C1=O	351.131	-2.386	-6.4	23	1	8	5	7
CHEMBL2376127	Cc1nc(\N=N\c2cc(ccc2S(=O)(=O)O)S(=O)(=O)O)c(CCC(=O)O)c(C(=O)O)c1O	489.015	1.72	-3.7	32	2	8	5	10
CHEMBL117173	COc1cc2nc(CC(N)C(=O)O)c(CP(=O)(O)O)nc2cc1OC	371.088	0.279	-5.8	25	2	7	4	7
CHEMBL197156	CS(=O)(=O)O.NC(=N)NC(=O)c1cc2c(cccc2s1)[N+](=O)[O-]	360.02	0.937	-3	23	2	2	4	7
CHEMBL3250955	CCOC(=O)\C=C\C(=O)NNS(=O)(=O)C[C@H](N)C(=O)O	309.063	-2.532	-5.6	20	0	8	4	7
ZINC000068606315	c1c(CN2CCNCCNCC2)n[nH]c1CN1CCNCCNCC1	350.291	-1.601	-3.6	25	3	4	5	7
CHEMBL135430	[Na+].COc1ccc(CC\C(=N/O)\c2c(O)cc(OCC(=O)[O-])cc2O)cc1O	399.093	-2.244	-1.2	28	2	8	4	9
ZINC000012486783	NC(=O)c1c2c(sc1NC(=O)CSc1nc(N)cc(=O)[nH]1)CCC2	365.062	0.732	-7.1	24	3	5	4	7
CHEMBL1802108	Cl.CCOc1onc(c1)c2nc(c[nH]2)[C@@H](O)[C@H](O)[C@H](O)CO	335.088	-0.367	-6.6	22	2	7	5	8
CHEMBL1092803	Nc1nc(S[C@@H]2O[C@H](O)[C@@H](O)[C@H](O)[C@H]2O)c(C#N)c(c3ccc(Br)cc3)c1C#N	477.995	0.686	-7.5	29	3	3	5	10
CHEMBL1162463	NC1C=C(OC[C@@H]2CP(=O)(O)CO2)N=C(N)N1O	278.078	0.056	-6.2	18	2	3	4	8
CHEMBL1794938	CCC(=O)O\N=C\1/COC2(CCN(C)CC2)C1.OC(=O)\C=C/C(=O)O.OC(=O)C(=O)O	446.154	0.048	-3.4	31	2	4	4	9
CHEMBL44870	OCCNCCNc1ccc(Cl)c2C(=O)c3c(O)ccc(O)c3C(=O)c12	376.083	1.52	-7.8	26	3	6	5	7
ZINC000022583295	NC(=O)CN1CCCNCCN(CC(N)=O)CCN(CC(N)=O)CC1	357.249	-3.658	-6.7	25	1	6	4	7
CHEMBL22155	Nc1nc(O)c2ncn(CS(=O)(=O)C(CO)CO)c2n1	303.064	-2.16	-6	20	2	5	4	10
ZINC000005125100	CC(=O)O[C@H]1[C@H](NC(=O)OCc2ccccc2)C[C@H](NC(=O)OCc2ccccc2)[C@H](O)[C@@H]1O	472.185	1.634	-7.4	34	3	7	4	8
CHEMBL1998117	NC1=NC(=CC(N1)OCC2(CO)CCC2)NCC3(CO)CCC3	324.216	0.003	-6.8	23	3	8	5	7
CHEMBL202944	COc1ccc(cc1)S(=O)(=O)[C@@H]2O[C@H](CO)[C@H](O)[C@H](O)[C@H]2O	334.072	-1.731	-6.4	22	2	4	4	8
ZINC000020530116	O=S(=O)(NNC(=S)Nc1ccc(S(=O)(=O)Nc2ncccn2)cc1)c1ccccc1	464.04	1.457	-7.5	30	3	7	4	7
ZINC000002568334	Nc1cc(S(=O)(=O)O)c2ccc3c(S(=O)(=O)O)cc(S(=O)(=O)O)c4ccc1c2c43	456.96	1.906	-7.7	29	4	3	4	7
CHEMBL287869	O[C@@H]1C[C@](O)(C[C@@H](OC(=O)\C=C\c2cccnc2)[C@@H]1O)C(=O)O	323.101	-0.662	-6.7	23	2	4	4	7
CHEMBL1979891	CCOC(=O)C1C(c2ccc(O)c(OC)c2)c3c(O)[nH]nc3CC1(C)O	362.148	1.448	-6.4	26	3	4	4	7
CHEMBL1999596	CCOC(=O)C(O)(NC(=O)NC(O)(C(=O)OCC)C(F)(F)F)C(F)(F)F	400.071	-0.086	-6.2	26	0	6	4	7
CHEMBL2260249	NC(=N)NS(=O)(=O)c1ccc(NNc2ncnc3ccccc23)cc1	357.101	1.241	-8.3	25	3	5	5	7
ZINC000022033144	Cc1nonc1C1=CS[C@@H]2NC(=N)NC(=N)N2N1	266.07	-0.424	-7.3	18	3	1	5	7
CHEMBL1449737	S=C1NCN2CCN(CC2)CNC(=S)C(=S)NCN3CCN(CC3)CNC1=S	460.132	-1.267	-5.6	28	6	0	4	8
CHEMBL197808	N[C@@H]1CC(N)[C@H](OCSc2ccnc3cc(ccc23)C(F)(F)F)C(O)[C@@H]1O	403.118	1.468	-7	27	3	4	4	7
CHEMBL3426128	COC(=O)[C@]1(F)O[C@@H]([C@H](O)[C@H](O)COP(=O)(C)OC)[C@H](NC(=O)C)[C@@H](N)[C@H]1F	434.127	-1.398	-6.1	28	1	8	4	10
CHEMBL313047	CC(C)C[C@@H]1[C@H](CCCOC(=O)NCCCC[C@H](NC1=O)C(=O)NCc2ccncc2)C(=O)NO	491.274	1.657	-6.8	35	2	6	5	7
CHEMBL1910596	Cl.NC(=N)N\N=C/c1c(nc2sc(N)nn12)c3ccccc3	336.067	1.279	-7.6	22	3	3	4	7
CHEMBL54324	Nc1nc(cs1)\C(=N\O)\C(=O)N[C@H]2[C@H]3SCC(=C(N3C2=O)C(=O)O)\C=C\4/CCNC4=O	464.057	-0.912	-6.3	31	4	5	5	10
ZINC000071284842	COc1ccc(Cl)cc1NC(=O)C[C@H]1NC(N/N=C/c2ccc(O)cc2)=NC1=O	415.105	1.861	-7.9	29	3	6	4	7
CHEMBL1909796	Cl.NC(=N)NC(=O)c1nc(Cl)c(NCc2ccccn2)nc1N	356.067	0.764	-7.2	23	2	4	5	7
CHEMBL1358094	CCOC(=O)[C@H](O)[C@@H](O)c1cccc(c1)[C@H](O)[C@@H](O)C(=O)OCC	342.131	-0.399	-6.9	24	1	8	4	8
CHEMBL1997516	CC1=C(CC(=C(C)N1)C(=O)NNC(=O)CC#N)C(=O)NNC(=O)CC#N	359.134	-1.35	-6.7	26	1	4	5	7
ZINC000016430835	O=C(/C=C/c1c(O)[nH]c2ncccc2c1=O)C(=O)/C=C/c1c(O)[nH]c2ncccc2c1=O	430.091	1.436	-8.1	32	4	5	4	8
ZINC000054363392	COc1cc(S(=O)(=O)NC(CO)(CO)CO)c(OC)cc1C	335.104	-0.994	-5.9	22	1	8	4	7
ZINC000001630171	NC(=S)Nc1nnc(-c2ccc(-c3nnc(NC(N)=S)o3)cc2)o1	362.037	1.098	-6.7	24	3	4	4	8
CHEMBL2105983	[Ca+2].Nc1ccc(C(=O)[O-])c(O)c1.Nc2ccc(C(=O)[O-])c(O)c2	344.032	-1.705	-5.3	23	2	2	4	8
ZINC000085876748	CCN1C(=O)/C(=C\c2ccc(O[C@@H]3O[C@H](CO)[C@H](O)[C@H](O)[C@H]3O)c(OC)c2)SC1=S	457.087	0.095	-5.1	30	3	6	4	10
CHEMBL1964845	Cl.OCC1OC(C(O)C1O)c2nc(cs2)C3=NCCCN3	335.071	-0.541	-6.8	21	3	3	4	8
CHEMBL1644784	C\C(=C/c1cc(F)c(OCC2(F)CCC2)cc1F)\C(=O)N[C@@H]3[C@H](O)[C@@H](O)[C@H]4OCO[C@H]4[C@@H]3O	473.166	0.962	-6.3	33	4	6	4	7
ZINC000031320231	O=[N+]1C=CC(O)=C(O)C1=C1C(O)=C(O)C=CN1O	253.046	1.378	-6.8	18	2	0	5	7
ZINC000003838487	COC(=O)[C@H](NC(=O)C1=C[C@@H](NC(=O)Nc2ccc(C(C)=O)cc2)[C@@H](O)[C@H](O)C1)C(C)C	447.201	0.745	-6.4	32	2	7	5	7
ZINC000005941387	O=c1[nH]c(=S)[nH]n1C(=S)n1[nH]c(=S)[nH]c1=O	275.956	-0.537	-6.1	16	2	0	4	7
CHEMBL117417	Nc1nc(O)c2ncn(Cc3cccc(CSCP(=O)(O)O)c3)c2n1	381.066	1.531	-6.7	25	3	6	4	8
CHEMBL596635	CCOC(=O)c1c(CNC)n(C)c2cc(Br)c(O)cc12.OC=O.OC=O	432.053	1.944	-2.3	26	2	4	4	7
CHEMBL227235	CNc1nc(I)nc2c1ncn2CC(CP(=O)(O)O)CP(=O)(O)O	490.962	0.444	-6.1	24	2	7	5	7
ZINC000008636316	COCCNC(=O)[C@H]1C[C@@H](O)[C@H](O)[C@@H]2N=C(Nc3ccc(C(C)C)cc3)S[C@@H]21	407.188	1.566	-6.5	28	3	6	4	7
ZINC001570001153	O=C(O)[C@H]1O[C@@H](NC(=O)C2=CC3=CC=CCC3=[N+]([O-])c3ccccc32)[C@H](O)[C@@H](O)[C@@H]1O	428.122	-0.439	-7.5	31	4	3	5	7
CHEMBL3935481	Nc1cc(Nc2cccc(Cl)c2)nc3c(\C=C\4/NC(=O)NC4=O)cnn13	369.074	1.889	-8.4	26	4	3	4	7
CHEMBL1883352	CC(C)(O)C#Cc1ccc(CNC[C@H]2O[C@H]([C@H](O)[C@@H]2O)n3cnc(n3)C(=O)N)s1	421.142	-1.03	-6.9	29	3	6	5	10
CHEMBL348752	COC1OC(CO)C(Sc2nc(C)ccc2O)C(O)C1O	317.093	-0.358	-6.2	21	2	4	4	8
ZINC000004108257	O=C(O)c1cc(Nc2ccc([N+](=O)[O-])cc2S(=O)(=O)O)cc(C(=O)O)c1	382.011	1.982	-7	26	2	6	4	7
CHEMBL3933068	COC[C@@H]1CCCN1Nc2nc(NC3CC3)n4ncc(\C=C\5/NC(=O)NC5=O)c4n2	413.192	0.317	-7.4	30	5	7	4	10
CHEMBL1201178	C[C@@H](Cc1ccccc1)NC(=O)[C@@H](N)CCCCN.CS(=O)(=O)O.CS(=O)(=O)O	455.176	0.198	-3	29	1	8	5	7
ZINC000215900976	CC(C)(C)NS(=O)(=O)c1ccccc1-c1cc(NCCO)nc(N)n1	365.152	1.207	-7.2	25	2	6	4	7
CHEMBL1723926	Nc1cc(N)nc(SCC(=O)NC(=O)NC2CCCC2)n1	310.121	0.501	-6.1	21	2	4	4	7
CHEMBL4096327	Nc1nc(N[C@@H]2CC[C@@H](O)[C@H]2O)c3c(c[nH]c3n1)C#N	274.118	-0.292	-7.2	20	3	2	5	7
CHEMBL3327150	CSc1ccc2c(NC(P(=O)(O)O)P(=O)(O)O)ncnc2n1	365.995	0.798	-6.7	22	2	5	5	7
CHEMBL39252	C\C(=C/c1ccc(N2CCCC2)c(F)c1)\C(=O)N[C@@H]3[C@H](O)[C@@H](O)[C@H]4OCO[C@H]4[C@@H]3O	422.185	0.152	-5.7	30	4	4	4	7
ZINC000004391708	CCOC(=O)c1nc[nH]c1N/N=C1\C(=N)NN(C)C1=N	278.124	-0.241	-7	20	2	4	5	7
CHEMBL3679709	COc1cc(Cl)c(Cc2nnc(s2)c3occc3)cc1[C@@H]4O[C@H](CO)[C@@H](O)[C@H](O)[C@H]4O	468.076	1.566	-7.4	31	4	6	4	10
CHEMBL1999828	CC(=O)NNc1nc(C)c(s1)C(=O)NNC(=O)C(=O)Nc2c(C)cccc2C(C)(C)C	446.174	1.92	-6.7	31	2	4	5	7
CHEMBL3228409	O[C@@H]1CO[C@@H](NC(=O)N(CCCl)N=O)[C@H](O)[C@H]1O	283.057	-1.643	-5.7	18	1	4	4	7
ZINC000016102439	CNc1nnc(/C(=N\NC(N)=S)c2ccccc2N)s1	307.067	0.748	-6.3	20	2	4	4	7
CHEMBL1976292	CC(C)(CO)CNc1nc(N)nc(Cl)c1\C=N\O	273.099	0.951	-5.6	18	1	5	4	7
CHEMBL258745	OP(=O)(O)Oc1ccc(CNC(=O)CC2=CC(=O)Oc3cc(OP(=O)(O)O)ccc23)cc1	485.028	1.595	-8.2	32	3	8	5	7
CHEMBL1541695	CCS(=O)(=O)O.CC1(C)N=C(N)N=C(N)N1c2cccc(CN)c2	356.163	0.225	-3.4	24	2	3	4	8
CHEMBL1962845	CCOP(=O)(CNc1nc(N)c(nc1Cl)C(=O)NC(=N)N)OCC	379.092	0.971	-6.9	24	1	8	5	9
CHEMBL1770644	C[C@@H](NC(=O)[C@H](O)[C@@H](O)C(=O)N1CCC[C@@H]1c2csc(N)n2)c3ccc(cc3)n4cccn4	470.174	1.174	-6.5	33	4	7	4	9
CHEMBL2007731	C1CNOCCCONCCCNOCCCONC1	292.211	-0.355	-6.8	20	1	0	4	8
ZINC000031290884	O=C(O)[C@H]1O[C@@H](O[C@@H]2N=C(c3ccccc3Cl)c3cc(Cl)ccc3N=C2O)[C@H](O)[C@@H](O)[C@@H]1O	496.044	1.667	-6.4	33	4	4	5	8
CHEMBL21621	CSC1OC(C(NC(=O)C(Cl)Cl)C(C)O)C(O)C(O)C1O	363.031	-1.174	-5.9	21	1	5	5	7
ZINC000016136375	NC(=S)NCn1c(=S)sc(=S)n1CNC(N)=S	325.957	0.391	-5.3	17	1	4	4	7
CHEMBL366730	[Na+].Nc1nc(cc(c2cccc(NC(=O)C(O)CCC(=O)[O-])c2)c1C#N)c3cc(F)ccc3O	472.116	-1.452	-6.8	34	3	7	4	8
CHEMBL3216187	Cl.Cl.CN(C1CN=C(NC(=O)N)NC1=O)C(=O)C[C@@H](N)c2cc(CN)on2	424.114	-1.652	-7.6	27	2	5	5	8
CHEMBL1991363	Cl.CCc1c(CN)c(CC)c(CNC2=NCCN2)c(CC)c1CNC3=NCCN3	421.272	1.352	-6.5	29	3	8	5	7
ZINC000003838773	COc1ccc(C[C@H](NC(=O)C2=C[C@@H](NC(=O)c3cccs3)[C@@H](O)[C@H](O)C2)C(N)=O)cc1	459.146	0.12	-6.2	32	3	8	5	7
ZINC000006910305	CCOC(=O)C1=C(CC)Nc2ccccc2N=C1NC=C1C(=O)NC(=O)NC1=O	397.139	1.209	-7.5	29	3	4	4	8
ZINC000013635123	CCNc1nc(/N=C(\N)NOC)nc(NCC)n1	254.16	-0.168	-6.6	18	1	6	4	7
CHEMBL2013179	N\C(=N/O)\c1nc(Cl)c(NCC(=O)O)nc1N	260.042	-0.697	-6.1	17	1	4	5	7
CHEMBL320025	CN(CC(=O)O)NC(=O)C[C@H](N)c1csc(CNC(=O)OC(C)(C)C)n1	387.158	0.605	-6.5	26	1	8	4	8
ZINC000101152015	C/C(NCCNC(=O)c1nnc(N)[nH]1)=C1/C(=O)NC(=O)SC1=O	339.075	-1.51	-7	23	2	5	5	9
CHEMBL3695452	C[C@H](N[C@@H](Cc1ccc(cc1)c2cccc(Cl)c2)C(=O)NC3=NNNN3C)C(=O)O	430.152	1.323	-7.7	30	3	7	5	7
ZINC000257229857	CN[C@@H]1CCC[C@@H](n2cnc3c2nc(N)nc3N)[C@@H]1O	277.165	-0.335	-7.1	20	3	2	4	8
ZINC000077522421	Nc1nc(CCCNC[C@@]2(O)CNCCOC2)cs1	286.146	-0.402	-5.6	19	2	6	4	7
CHEMBL3216855	Cl.Cl.CN(C1CN=C(NC(=O)N)NC1=O)C(=O)C[C@@H](N)CSCCN	417.112	-1.78	-6.7	25	1	7	5	7
ZINC000013523270	C[C@H](NC(=O)[C@H](C)NC(=O)OC(C)(C)C)C(=O)NCC(=O)Nc1ccc([N+](=O)[O-])cc1	437.191	1.067	-6.2	31	1	8	4	7
CHEMBL1892646	CCOC(=O)c1ccccc1NC(=C2C(=O)NC(=S)NC2=O)O	335.058	0.576	-6.7	23	2	4	4	7
CHEMBL203322	OC[C@H]1O[C@@H](NC(=O)c2ccc(Br)s2)[C@H](O)[C@@H](O)[C@@H]1O	366.973	-0.96	-6.2	20	2	3	5	7
CHEMBL435176	CCOC(=O)COC1CCN(CC1)C(=O)[C@H](C)NC(=O)c2ccc(cc2)C(=N)NO	420.201	0.68	-7	30	2	8	4	7
CHEMBL1985683	N\C(=N/N1C(=S)Nc2ccccc2C1=O)\NN3C(=S)Nc4ccccc4C3=O	411.057	1.753	-6.2	28	4	2	4	7
CHEMBL3218372	CN(CC(O)C(O)C(O)C(O)CO)C=C(C#N)C#N	271.117	-2.715	-5.4	19	0	7	5	8
CHEMBL393820	CC(C)[C@H](N)C(=O)O[C@@H]1[C@@H](CO)O[C@@H](N2C=CC(=NC2=O)N)[C@]1(C)O	356.17	-1.639	-6.2	25	2	5	4	10
CHEMBL1254925	N\C(=N/O)\c1ccc(cc1)C(=O)CS(=O)(=O)c2ccc(cc2)\C(=N\O)\N	376.084	0.532	-7.5	26	2	6	4	7
CHEMBL334512	C[C@@H](O)[C@@H]1[C@H]2SC(=C(N2C1=O)C(=O)O)CN(CC(=O)N)CC(=O)N	358.095	-2.533	-6.7	24	2	8	4	7
CHEMBL3654907	OC[C@H]1O[C@H]([C@H](O)[C@@H](O)[C@@H]1O)c2ccc(Cl)c(Cc3ccc(cc3)N4CCOCC4)c2	449.161	1.282	-6.1	31	4	5	4	7
ZINC000104229282	CNC(=O)[C@@H]1OCCOCCO[C@H](C(=O)NC)[C@H](C(=O)NC)OCCOCCO[C@@H]1C(=O)NC	492.243	-3.442	-2.7	34	1	4	4	10
ZINC000095360386	CCCCSc1nc(N)cc(N[C@@H]2CCNC[C@H]2O)n1	297.162	1.086	-6.6	20	2	6	4	7
CHEMBL2088110	Cc1cc(CNc2nccc(Nc3cc(CO)[nH]n3)n2)on1	301.129	1.344	-7.1	22	3	6	4	8
CHEMBL1205225	Cn1cc(N)cc1C(=O)Nc2ccc(c3cc(ccc23)S(=O)(=O)O)S(=O)(=O)O	425.035	1.506	-8.3	28	3	4	4	7
CHEMBL1650565	CN1C(=CC(=N)c2ccc(Nc3cc(C)[n+](C)c(N)n3)cc12)C.OS(=O)(=O)[O-]	406.142	0.825	-3	28	3	2	4	8
CHEMBL500420	Cc1nc(NS(=O)(=O)c2ccc(cc2)C(C)(C)C)sc1C[C@@H]3O[C@H](CO)[C@H](O)[C@H](O)[C@H]3O	486.149	0.935	-4.4	32	3	6	5	9
CHEMBL3221802	O[C@@H]1C[C@@](O)(C=C([C@H]1O)c2cn(nn2)c3ccccc3O)C(=O)O	333.096	-0.703	-6.9	24	3	3	5	8
ZINC000073667145	CCNc1nc(NCC)nc(NNC(=S)NC[C@@H]2CCS(=O)(=O)C2)n1	388.146	-0.039	-6.4	25	2	8	5	9
CHEMBL4070896	CC(C)(N)[C@H](NC1COCc2cc(ccc12)C#Cc3ccc(CN4CCOCC4)cc3)C(=O)NO	478.258	1.691	-1.9	35	4	6	4	7
CHEMBL3606035	O[C@H]1[C@@H](O)[C@@H](O[C@@H]1COP(=O)(O)CS(=O)(=O)O)N2C=CC(=O)NC2=O	402.013	-2.797	-6.7	25	2	6	5	10
ZINC000008713677	CCOC(=O)c1ccc(N/N=C2/C(=N)NN/C2=N\S(C)(=O)=O)cc1	352.095	0.074	-7.1	24	2	5	4	7
ZINC000039929537	CN1NC(c2cccc(C(=O)O)c2)=C2NN=C(N)N21	260.102	-0.489	-7.4	19	3	2	4	7
ZINC000031719312	Nc1cnc(N2CCN(c3ncc(N)cc3N)CC2)c(N)c1	300.181	0.132	-6.4	22	3	2	4	8
CHEMBL1981450	C\C(=N/Nc1nnc(S)n1N)\C2=C(O)C=C(C)OC2=O	296.069	0.084	-6.2	20	2	3	4	10
CHEMBL3672877	CC(C)(Cc1ccc(s1)C(=O)Oc2ccc(cc2F)C(=N)N)C(=O)NCc3nnn[nH]3	445.133	1.789	-7.6	31	3	8	4	8
CHEMBL1205036	NC(=N)NCCNC(=O)\C=C\C1=C(N2[C@@H](\C(=C/c3ccccn3)\C2=O)S(=O)(=O)C1)C(=O)O	460.117	-1.444	-6.9	32	3	7	5	7
ZINC000002279346	CCOC(=O)/C(=C/Nc1nonc1C(=N)NO)C(C)=O	283.092	-0.178	-6.3	20	1	6	4	9
CHEMBL544965	Cl.Cl.NC1=NCN(C(=N1)N)c2cccc(\C=C\c3cccc(c3)N4CN=C(N)N=C4N)c2	474.156	1.514	-5.4	32	4	4	4	10
CHEMBL1835349	Cl.C[C@H](N)C(=O)N1CC2(C[C@H]1C(=O)NCCCCCC(=O)NO)SCCS2	440.132	0.715	-6.6	27	2	8	4	7
CHEMBL324979	C[S+]([O-])C[C@H](CO)NC(=O)\C=C\c1c(C)nc(O)nc1O	315.089	-0.935	-5.8	21	1	6	4	7
ZINC000575436343	O=C(O)[C@H]1O[C@@H](Oc2ccc(Cl)c3cccnc23)[C@H](O)[C@@H](O)[C@@H]1O	355.046	0.159	-7	24	3	3	4	7
ZINC000033937592	NOC(=O)[C@H](O)[C@@H](O)C(=O)ON	180.038	-3.458	-4.2	12	0	3	4	8
ZINC000016682972	CCOC(=O)[C@@H](O)[C@H](O)[C@H](O)[C@@H](O)c1nnc2ccccc2n1	323.112	-1.296	-7	23	2	6	4	9
CHEMBL4081266	CC1(C)CC(CC(C)(CNC(=O)n2cnc(N)n2)C1)NC(=O)n3cnc(N)n3	390.224	0.435	-6.9	28	3	3	4	10
CHEMBL1819320	N[C@@H](CNC(=O)[C@@H](N)CO)[C@@H](O)c1ccc(cc1)[N+](=O)[O-]	298.128	-1.609		21	1	7	5	7
CHEMBL2062295	CN(C)C(=S)SCCn1c(C)ncc1[N+](=O)[O-].OC(C(O)C(=O)O)C(=O)O	424.072	-0.443		27	1	7	4	10
CHEMBL587799	Cc1nc(N)nc(N)c1Oc2cccc(Cl)c2.OS(=O)(=O)O	348.03	1.742		22	2	2	4	7
ZINC000075286141	O=[N+]([O-])c1cc(NCCO)ccc1S(=O)(=O)NCCO	305.068	-0.73		20	1	8	4	7
CHEMBL48494	NC1C(O)C(O)C(O)OC1OCc2ccc3C(=O)c4ccccc4C(=O)c3c2	385.116	-0.298		28	4	3	4	8
ZINC000004235336	Nc1c(N)c(/C=N/O)cc(/C=N/O)c1N	209.091	0.049		15	1	2	5	7
ZINC000071244999	CC(=O)OCNC(NCO)NCO	193.106	-2.541		13	0	7	5	7
CHEMBL3301749	CC(C)C[C@H](N)C(=O)N\N=C\c1c(C)nc(O)nc1O	281.149	0.02		20	1	5	4	7
CHEMBL331250	Cc1nc(\N=N\c2ccc(cc2)P(=O)(O)O)c(CP(=O)(O)O)c(C=O)c1O	415.033	1.804		27	2	6	5	7
ZINC000003901920	Cc1nnc(N/N=C(\CCC(=O)O)C(=O)O)[nH]c1=O	269.076	-0.809		19	1	6	4	7
CHEMBL1161259	Nc1ncnc2c1ncn2C3O[C@H](CO)[C@@H]([C@H]3O)S(=O)(=O)O	331.059	-2.084		22	3	3	4	10
ZINC000827847787	Cc1nc(C)c(CC(=O)NCCc2nc(N)cc(O)n2)c(O)n1	318.144	-0.222		23	2	5	4	8
CHEMBL57548	Nc1cc(SCCOCP(=O)(O)O)nc(N)n1	280.04	-0.115		17	1	6	4	7
CHEMBL3198889	OC(C(O)C(=O)N\N=C\c1occc1)C(=O)N\N=C\c2occc2	334.091	-0.805		24	2	7	4	8
CHEMBL341414	C[C@@H](O)[C@@H]1[C@H]2SC(=C(N2C1=O)C(=O)O)CN(C)CC(=O)NCC(=O)N	372.11	-2.272		25	2	8	4	7
CHEMBL342941	NC1N=C(N)Nc2ncn(CC#CCO)c12	220.107	-1.424		16	2	1	4	7
ZINC000253412744	CC(=O)c1c2c(c(O)c(C)c1O)[C@]1(C)C(=CC(=O)/C(=C(/C)NCCOCCO)C1=O)O2	431.158	1.167		31	3	7	4	9
ZINC000033014428	CSc1cccc(NC(=O)NCCNC(=O)c2nonc2N)c1	336.1	0.925		23	2	6	4	7
ZINC000097375772	CC(C)NC(=O)Nc1ccc(O)c(-c2nc(-c3nc[nH]n3)no2)c1	329.124	1.757		24	3	4	4	7
CHEMBL2298942	Fc1ccc(cc1)n2c(S)nnc2C3=CC(=O)NC4=C3C(=O)NC(=O)N4	372.044	0.58		26	4	2	4	7
CHEMBL555323	Cl.Cn1cc(NC(=O)c2oc(cc2)[N+](=O)[O-])cc1C(=O)NCCC(=N)N	384.095	1.256		26	2	7	4	7
CHEMBL1363497	COC(=O)C1=C(O)C2(CC(=C(O)C(C1)(C2)C(=O)O)C(=O)OC)C(=O)O	356.074	0.296		25	2	4	4	8
ZINC000067879738	CS(=O)(=O)CC[C@H](NC(=O)C1=C[C@@H](N)[C@@H](O)[C@H](O)C1)C(N)=O	335.115	-3.23		22	1	6	5	7
CHEMBL3504690	CN(Cc1cccc2cccnc12)C3CCS(=O)(=O)C3.OC(=O)CC(O)(CC(=O)O)C(=O)O	482.136	0.605		33	3	8	4	8
CHEMBL2001760	COc1cc(\C=C\C(=N/NC(=S)N)\c2sc(NNC(=O)C)nc2C)ccc1O	420.104	1.879		28	2	7	5	8
CHEMBL433664	Nc1ncnc2nn(C[C@@H](CO)OCP(=O)(O)O)nc12	304.069	-1.684		20	2	6	4	9
ZINC000001871640	OCN(CO)c1nc(CCC(Cl)(Cl)Cl)nc(N(CO)CO)n1	375.027	-0.414		22	1	8	4	9
ZINC000067742861	CNS(=O)(=O)CCNS(=O)(=O)c1sc2c(c1C(=O)O)CCNC2	383.028	-1.08		23	2	7	4	7
CHEMBL3642892	C\C(=C/c1ccc(s1)C(=O)Oc2ccc(cc2)C(=N)N)\C(=O)N[C@@H](CO)C(=O)O	417.099	1.216		29	2	8	5	7
CHEMBL205024	Nc1c(cnn1c2ccc(F)cc2)C(=O)c3cccc(c3)C(O)(CO)CO	371.128	0.997		27	3	6	4	7
ZINC000035682763	CCNc1nc(NCC)nc(NNC(=S)Nc2ccc([N+](=O)[O-])cc2)n1	377.138	1.957		26	2	8	5	9
ZINC000016138139	O=C1NC(=S)NC(=O)C1=CN1CCN(C=C2C(=O)NC(=S)NC2=O)CC1	394.052	-2.566		26	3	2	4	8
CHEMBL1962849	CNCCN(C)c1nc(N)c(nc1Cl)C(=O)NC(=N)N	300.121	-1.009		20	1	5	5	7
CHEMBL1962613	COC(=O)CNc1nc(N)c(nc1Cl)C(=O)NC(=N)N	301.069	-1.08		20	1	4	5	8
CHEMBL2295977	Cc1cc(C)c2c(NN\C=C(/C#N)\C(=O)Nc3nncs3)n[nH]c2n1	355.096	1.389		25	3	5	4	9
ZINC000096113667	CSCC[C@H](Nc1nc(N)nc2[nH]cnc21)C(=O)O	282.09	0.553	-6.3	19	2	6	4	7
CHEMBL2362771	OC[C@H]1O[C@H]([C@H](O)[C@@H]1O)c2nc(cs2)C(=O)Nc3cccc(Cl)c3Cl	404	1.856	-6.2	25	3	4	4	7
ZINC000115997836	C[C@@H]1C/C=C2\SC[C@@H](NC(=O)c3coc(n3)C[C@@H](O)C[C@H](O)/C=C/C=C/CNC2=O)C(=O)O1	477.157	0.622	-6.1	33	3	0	4	9
CHEMBL2078893	N#Cc1ccc(Nc2nc(Nc3cc[nH]n3)nc(Nc4cc[nH]n4)n2)cn1	360.131	1.815	-7.4	27	4	6	5	10
CHEMBL1388136	CC(C)NC(=O)NS(=O)(=O)c1cnccc1NCC#C.O[N+](=O)[O-]	359.09	0.175	-6.3	24	1	5	4	7
ZINC000006557637	O=C1NC(=O)N(Cc2ccccc2)C(=O)/C1=C\NC(CO)(CO)CO	349.127	-1.546	-7	25	2	7	5	7
ZINC000002172230	OCCNc1nc(Cl)nc(NCCO)n1	233.068	-0.667	-5.6	15	1	6	4	7
CHEMBL1626172	NS(O)(O)c1cccc2c3NC(=O)C(=O)Nc3cc(c12)[N+](=O)[O-]	338.032	1.261	-7.4	23	3	2	5	7
CHEMBL329488	[Na+].Oc1cc(\C=C\c2ccc3ccc(C(=O)[O-])c(O)c3n2)cc(O)c1O	361.056	-1.405	-6.2	26	3	3	4	7
CHEMBL1093021	OC[C@H]1O[C@H]([C@H](O)[C@@H](O)[C@H]1O)n2cc(CCc3ccccc3)nn2	335.148	-0.964	-7.1	24	3	5	4	8
CHEMBL95533	N\C(=C(\C#N)/C(=C(\N)/SCCO)/C#N)\SCCO	286.056	-0.175	-5.5	18	0	7	4	8
CHEMBL2112707	COC(OC)[C@]1(C)Oc2ccc(N)cc2[C@H](\N=C(\NCc3ccc(OC)cc3)/NC#N)[C@@H]1O	455.217	1.666	-6.7	33	3	7	4	8
CHEMBL326995	COC(=O)[C@@H](Cc1ccc(O)c(O)c1)N(C)C(=O)\C=C\c2ccc(O)c(O)c2	387.132	1.765	-7.2	28	2	6	4	7
ZINC000101153894	C/C(=C\C(=O)c1c(O)c2ccccc2n(C)c1=O)NC(CO)(CO)CO	362.148	-0.364	-6.6	26	2	7	5	8
CHEMBL3230007	CC(=O)C1=C(O)\C(=C(/O)\Nc2cccc(NC(=O)C(=O)O)c2)\C(=O)OC1=O	376.054	0.376	-7.2	27	2	4	5	9
ZINC000002712541	Nc1nc(SCC(=O)NCCc2ccccc2)[nH]c(=O)c1NC(=O)c1ccco1	413.116	1.648	-7.5	29	3	8	4	7
CHEMBL2064305	OC[C@H]1O[C@H](Oc2ccc(cc2Cl)n3ccc4cc(ccc34)[N+](=O)[O-])[C@@H](O)[C@@H](O)[C@@H]1O	450.083	1.371	-6.8	31	4	5	4	9
ZINC000003157929	N=C(N/N=C/c1cc(Br)ccc1O)c1nonc1N	323.997	1.069	-6.8	19	2	3	4	7
CHEMBL1933484	OC[C@H]1O[C@@H](Cc2cn(Cc3ccccc3Cl)nn2)[C@H](O)[C@@H](O)[C@@H]1O	369.109	-0.635	-7	25	3	5	4	8
ZINC000072477213	CCOc1ccc(-c2ccnc(NC[C@H](O)CO)n2)cc1C(=O)O	333.132	1.006	-6.8	24	2	8	4	7
CHEMBL1988400	CC(=O)c1cccc(NC(=O)C(=O)NNc2nnc(S)n2N)c1	335.08	-0.435	-6.5	23	2	4	5	9
ZINC000244899693	Nc1nc(NCc2cccnc2N)cc([C@H]2C[C@@H](O)C2)n1	286.154	0.886	-7	21	3	4	4	7
CHEMBL214215	COc1cccc(c1)C(=O)NNC(=O)C2(CCCCC2)C(=O)N[C@H]3CC(=O)OC3O	419.169	0.157	-7.2	30	3	5	4	7
ZINC000001683644	Nc1cc2c(cc(S(=O)(=O)O)cc2S(=O)(=O)O)cc1S(=O)(=O)O	382.944	0.162	-7.4	23	2	3	4	7
CHEMBL1085690	Nc1nc(S[C@@H]2O[C@H](O)[C@@H](O)[C@H](O)[C@H]2O)c(C#N)c(c3ccc4ccccc4c3)c1C#N	450.1	1.077	-8.8	32	4	3	5	10
CHEMBL3248286	C\C(=C/1\C(=O)OC(=O)C(=C1O)C(=O)C)\Nc2cc(O)ccc2N	318.085	1.145	-6.4	23	2	3	4	8
ZINC000218833044	Nc1nc(NCc2nc(-c3ccncc3)n[nH]2)cc(C2CC(N)C2)n1	337.176	1.056	-7.2	25	4	5	4	8
CHEMBL25742	CN(Cc1cnc2nc(N)nc(N)c2n1)c3ccc(cc3)C(=O)NCCCP(=O)(O)O	446.158	0.518	-6	31	3	8	5	9
CHEMBL2070402	CSCC(CO)(CO)NCc1c[nH]c2c(N)ncnc12	297.126	-0.284	-5.7	20	2	7	5	7
CHEMBL4063991	COc1cc(CP(=O)(O)CC[C@H](N)C(=O)O)cc(c1O)[N+](=O)[O-]	348.072	0.881	-6.1	23	1	8	4	7
ZINC000003999163	N=C(N)SCCNc1nc2c(ncnc2N)[nH]1	252.091	-0.026	-5.8	17	2	4	5	7
CHEMBL305130	OP(=O)(O)N1CCN=C1N\N=C\c2c3ccccc3c(\C=N\NC4=NCCN4)c5ccccc25	478.163	1.563	-6.7	34	5	5	5	8
CHEMBL3898562	Cn1cc(Nc2cnc3[nH]cc(C(=O)NC(C)(C)CO)c3n2)cn1	329.16	0.936	-7	24	3	5	4	7
ZINC000059490004	CN(C)S(=O)(=O)c1cc([N+](=O)[O-])ccc1NNC=C1C(=O)NC(=O)NC1=O	398.064	-0.988	-7	27	2	6	4	9
ZINC000004552106	O=P(O)(O)OC1COc2ccccc2OCC(OP(=O)(O)O)COc2ccccc2OC1	492.059	1.871	-6.9	32	3	4	4	8
CHEMBL3276799	C\C(=N/OCC(O)CNC(C)(C)C)\c1ccccc1O.OC(=O)\C=C/C(=O)O	396.19	1.594	-4.4	28	1	8	5	7
ZINC000745883384	O=C(COC(=O)c1nnc(O)c2ccccc21)Nc1ccc2nc(O)[nH]c2c1	379.092	1.713	-7.6	28	4	4	4	8
ZINC000104246954	Oc1nnc(O)c2nc(O)c(O)nc12	196.023	-0.758	-6	14	2	0	4	8
CHEMBL589980	OC[C@H]1O[C@H]([C@H](O)[C@@H](O)[C@@H]1O)c2ccc(Cl)c(Cc3nnc(CC(F)(F)F)s3)c2	454.058	1.402	-8	29	3	5	4	8
ZINC000408631360	CCc1nc(S/C(=C/C2C(=O)NC(=O)NC2=O)C(=O)O)n[nH]1	325.048	-0.59	-7.1	22	2	5	4	7
CHEMBL307109	OCN1C(=O)C2C3C(C(C4C(C3C(=O)O)C(=O)N(CO)C4=O)C(=O)O)C2C1=O	396.08	-3.25	-7.8	28	4	4	4	8
CHEMBL20331	Nc1nc(O)c2ncn([C@H]3C[C@@H]4C[C@](CC(=O)O)(C[C@@H]4C3)C(=O)O)c2n1	361.139	1.021	-6.2	26	4	4	4	8
ZINC000016248864	C[C@H](O)[C@@H](O)[C@@H](O)[C@@H](O)c1nnc2ccccc2n1	265.106	-0.839	-6.4	19	2	4	4	7
CHEMBL3273007	C[C@H](NC(=O)C)C(=O)N[C@@H](C)C(=O)N1CCC[C@H]1C(=O)NN(C)C(=O)O[C@@H](C)C(=O)O	443.202	-1.421	-7.2	31	1	7	4	7
CHEMBL197009	CN(CCCNC(=O)\C(=C\c1ccc(O)c(O)c1)\C#N)C(=O)\C(=C\c2ccc(O)c(O)c2)\C#N	462.154	1.988	-7.1	34	2	8	5	8
ZINC001560405369	CC1=C(C)N[C](Nc2cc(N=C3CCCC[C@@H]3N)nnc2C(N)=O)C=C1	354.204	1.904	-7.5	26	3	4	4	7
CHEMBL2135221	CCCCOC(=O)c1ccc(NC(=C2C(=O)NC(=O)NC2=O)O)cc1	347.112	1.191	-7.7	25	2	6	4	7
CHEMBL147423	COc1ccc(OC)c2c(\C=N\NC3=NCCN3)c4ccccc4c(\C=N\NC5=NCCN5)c12	458.218	1.776	-6.9	34	5	6	4	10
CHEMBL432793	OC(=O)C(=O)\C=C(/O)\c1cc(\C(=C\C(=O)C(=O)O)\O)c2ccccc2n1	357.048	1.34	-7.4	26	2	6	4	7
CHEMBL1989751	CCOc1ccc2nc3nc(O)nc(C)c3c(NC(C)(CO)CO)c2c1	358.164	1.746	-7.5	26	3	6	4	8
CHEMBL1203337	Cl.Cl.CCCOCC1CNc2nc(N)nc(O)c2N1	311.092	1.241		19	2	4	4	7
CHEMBL3544801	CC1=C(C(C(=C(CO)N1)C(=O)O)c2ccccc2[N+](=O)[O-])C(=O)OCC(C)(C)O	406.138	1.201		29	2	7	4	8
CHEMBL3707124	CO[C@@]12C(COC(=O)N)C3=C(N1CC4NC24)C(=O)C(=C(NCCc5c[nH]cn5)C3=O)C	428.181	-1.054		31	5	7	4	9
CHEMBL284743	NC(=N)Nc1nc(cs1)c2cccc(Nc3n[s+]([O-])nc3N)c2	348.058	1.959		23	3	4	5	8
ZINC000025576494	CCOC(=O)NC(=S)NN1CCN(NC(=S)NC(=O)OCC)CC1	378.114	-0.325		24	1	4	4	8
CHEMBL1962498	CCN(CC)CCNc1nc(N)c(nc1Cl)C(=O)NC(=N)N	328.153	0.089		22	1	7	5	7
CHEMBL1243239	OC[C@H]1O[C@@H](Oc2cccc(Cl)c2Cc3cnn(c3)c4ccccc4)[C@H](O)[C@@H](O)[C@@H]1O	446.124	1.295	-7.7	31	4	6	4	8
CHEMBL1878038	CCS(=O)(=O)O.CC1(C)N=C(N)N=C(N)N1c2cccc(CC(=O)Nc3ccccc3)c2	460.189	1.947		32	3	5	4	8
CHEMBL3426100	CC(=O)N[C@@H]1[C@@H](N)[C@@H](F)[C@@](F)(O[C@H]1[C@H](O)[C@H](O)CO)C(=O)OCC2CCCCC2	424.202	-0.941		29	2	7	5	8
CHEMBL3903473	COC(=O)C1=C[C@@H](O)[C@@H](O)[C@@H](O)[C@@H]1ON2C=CC(=C([C@@H]3[C@@H](C)C[C@@H](C)C[C@H]3C=C)C2=O)O	449.205	0.499		32	3	5	4	9
CHEMBL1080328	C[C@@H](NC(=O)[C@@]1(C)COC(=N1)c2cn(C)c3cc(Cl)cc(O)c23)C(=O)N[C@@H](CO)C(=O)O	466.126	0.139		32	3	7	5	8
CHEMBL1277415	CC[C@H]1O[C@@H](NC(=S)N\N=C\c2ccc(OC)cc2)[C@H](O)[C@@H](O)[C@@H]1O	369.136	-0.289		25	2	5	5	7
CHEMBL608375	CO[C@@H]1[C@@H](O)[C@@H](O)[C@H](Oc2cc(O)c3C(=O)C(=COc3c2)NC(=O)C)OC1(C)C	409.137	0.707		29	3	4	4	9
CHEMBL183188	NC(NCc1cc(O)n2nc(N)c(c2n1)[N+](=O)[O-])SCc3ccccc3	375.111	1.191		26	3	7	4	10
CHEMBL135482	[Na+].CNc1ccc(CCC(=O)c2c(O)cc(OCC(=O)[O-])cc2O)cc1O	383.098	-2.207		27	2	8	4	8
CHEMBL1903410	OC[C@H]1O[C@H]([C@H](O)[C@@H](O)[C@H]1O)c2nc(cs2)C(=O)NCC(F)(F)F	372.06	-1.05		24	2	4	5	8
CHEMBL1802110	Cl.CN(C)Cc1onc(c1)c2nc(c[nH]2)[C@@H](O)[C@H](O)[C@H](O)CO	348.12	-0.704		23	2	7	5	8
ZINC000001581320	Nc1ccc(Sc2ccc(N)cc2S(=O)(=O)O)c(S(=O)(=O)O)c1	375.986	1.496		23	2	4	4	7
CHEMBL308218	CSC1OC(C(NC(=O)c2cccnc2)C(C)Cl)C(O)C(O)C1O	376.086	-0.022		24	2	5	4	7
CHEMBL1366544	CCNC(=O)NC(=O)COC(=O)c1ccccc1SCC(=O)NC(=O)NCC	410.126	0.627		28	1	8	4	7
CHEMBL1802106	Cl.OC[C@@H](O)[C@@H](O)[C@H](O)c1c[nH]c(n1)c2cc(on2)c3ccccc3	367.093	0.901		25	3	6	5	7
CHEMBL1407204	COC(=O)[C@@H]1C[C@@]2(O)[C@@H](O)[C@@H](O)[C@@H](O)C[C@H]2N1Cc3cccnc3	338.148	-1.585		24	3	3	4	8
ZINC000003098280	N=C(NN(/C(N)=N\[N+](=O)[O-])C(C(=O)c1ccccc1)C(=O)c1ccccc1)N[N+](=O)[O-]	428.119	0.15		31	2	7	4	7
CHEMBL1162020	NCc1cc2oc1CNC(=O)c3oc(CNC(=O)c4oc(CNC2=O)cc4)cc3	398.123	1.028		29	4	1	4	7
CHEMBL543252	Cl.CCCNC(c1cc(cc2nc(O)c(O)nc12)[N+](=O)[O-])P(=O)(O)O	394.045	1.547		25	2	6	5	8
CHEMBL1191670	CN(C)CCn1nc2c3c(O)ccc(O)c3C(=O)c4c(NCCCN)ccc1c24	395.196	1.981		29	4	7	4	8
ZINC000004976925	CCNc1nc(NCC)nc(NCCO)n1	226.154	0.139		16	1	7	4	7
CHEMBL1973758	NC(Cc1ccccc1)C(=O)N[C@@H]2[C@H](O)\C(=N/O)\c3sccc23.OC(=O)C(F)(F)F	445.092	1.661		30	3	4	5	7
CHEMBL1532877	SC1=NCCOCCN=C(S)NCCOCCOCCOCCN1	380.155	-0.183		24	1	0	4	8
CHEMBL518191	NC(=O)c1c(CNC(C2CCNCC2)c3c[nH]cn3)no[n+]1[O-].OC(=O)C(F)(F)F	435.148	-0.406		30	3	6	5	8
ZINC000007367670	Nc1nc(/C(=N\O)C(=O)NCCCNCc2ccccc2)cs1	333.126	1.2		23	2	8	4	7
CHEMBL464285	COC1=C(Br)[C@@H](O)[C@@]2(CC(=NO2)C(=O)NCCc3cnc(N)[nH]3)C=C1Br	488.965	1.072		26	3	5	4	7
CHEMBL416469	CO[C@]12C3NC3CN1C4=C(C2COC(=O)N)C(=O)C(=C(C)C4=O)NC(C)C(=O)O	406.149	-1.547		29	4	6	4	9
CHEMBL553188	Cl.CNCCNc1ccc(NCCNC)c2C(=O)c3cnccc3C(=O)c12	389.162	1.541	7.7	27	3	8	4	7
CHEMBL2296829	COc1ccc(\C=N\NC(=S)Nn2c(S)nnc2c3ccncc3)cc1O	401.073	1.795		27	3	5	4	9
ZINC000058165880	CNc1ccc(S(=O)(=O)NC)cc1NS(=O)(=O)c1ccc(S(=O)(=O)NC)cc1	448.054	0.345	7.5	28	2	8	4	7
CHEMBL229658	O[C@H]1[C@H](O)[C@@H](N=[N+]=[N-])[C@@H](O[C@@H]2[C@@H](O)[C@H](O)[C@H](C[C@H]2N=[N+]=[N-])N=[N+]=[N-])O[C@@H]1CN=[N+]=[N-]	426.147	0.291		30	2	7	4	10
CHEMBL608390	OC[C@H]1O[C@@]2(CC(=NO2)c3ccc(cc3)[N+](=O)[O-])[C@H](O)[C@@H](O)[C@@H]1O	340.091	-1.111		24	3	3	4	9
CHEMBL1978556	COC(=O)C1CCC(=O)NCCCCC(NC(=O)C(N)CC(=O)O)C(=O)N1	386.18	-1.989		27	1	5	5	7
CHEMBL2062313	CN1C[C@@H]2CN(C[C@@H]2C1)c3ccc(nc3)c4ccccc4.OC(C(O)C(=O)O)C(=O)O	429.19	0.624		31	4	5	4	7
CHEMBL3764195	OC[C@H]1O[C@@]2(CC(=NO2)c3cc4ccccc4c5ccccc35)[C@H](O)[C@@H](O)[C@@H]1O	395.137	1.287		29	5	2	4	7
ZINC000012413083	CC1=NNC(=O)/C1=N\Nc1ccc(NC(=O)c2ccc(N/N=C3\C(=O)NN=C3C)cc2)cc1	445.161	1.486		33	4	6	5	9
CHEMBL3190651	COc1cccc(\C=N\NC(=O)N\N=C\c2cccc(OC)c2O)c1O	358.128	1.782		26	2	6	4	7
CHEMBL188746	COc1cc(\C=C\S(=O)(=O)CS(=O)(=O)\C=C\c2cc(O)c(O)c(OC)c2)cc(O)c1O	472.05	1.955		31	2	8	4	10
CHEMBL3527332	Nc1nc(N)[n+](nc1c2cccc(Cl)c2Cl)[C@@H]3O[C@@H]([C@@H](O)[C@H](O)[C@H]3O)C(=O)[O-]	431.04	-2.368		28	3	3	5	10
CHEMBL1271963	Cl.NCCCC\N=C\1/SC[C@@H]2[C@@H](O)[C@H](O)[C@@H](O)[C@@H](O)N12	327.102	-1.665		20	2	4	5	7
CHEMBL3544522	O[C@H]1C(ON2C(=O)NC(C2=O)(c3ccccc3)c4ccccc4)O[C@@H]([C@@H](O)[C@@H]1O)C(=O)O	444.117	-0.694		32	4	5	5	8
CHEMBL106588	CC(c1nc2cc(ccc2[nH]1)C(=O)N)c3nc4cc(ccc4n3C)C(=O)C(CP(=O)(O)O)C(=O)O	499.126	1.762		35	4	8	5	7
CHEMBL2447905	N.N.OS(=O)(=O)OOS(=O)(=O)O	227.972	-1.136		12	0	3	4	8
ZINC000016524877	O=C1N(O)c2ccccc2S[C@]12OC[C@@H](O)[C@@H](O)[C@@H]2O	299.046	-0.676		20	3	0	4	7
ZINC000038200248	Cc1ccc(NNc2nc3nonc3nc2NNC2=c3ccccc3=NC2=O)cc1	401.135	0.645		30	5	6	4	10
CHEMBL1962731	NC(=N)NC(=O)c1nc(Cl)c(NCCS(=O)(=O)Cc2ccccc2)nc1N	411.088	0.362		27	2	7	5	8
CHEMBL2007870	NC(=N)N\N=C\c1c(nc2ccn3c(\C=N\N=C(N)N)c(nc3n12)c4ccccc4)c5ccccc5	478.209	1.74		36	5	6	5	8
CHEMBL474736	[Na+].O[C@H]1C=C2[C@@H](NC(=O)c3c(OP(=O)([O-])OCc4ccccc4)c5OCOc5cc23)[C@H](O)[C@@H]1O	499.064	-2.925		34	5	5	4	10
CHEMBL1223972	COC(=S)NCc1ccc(O[C@@H]2O[C@@H](C)[C@H](O)[C@@H](O)[C@H]2O)cc1	343.109	-0.086		23	2	4	4	7
CHEMBL76953	NC(CCC(=O)O)C(=O)OC[C@H]1C[C@@H](O)C[C@@H](CO)N1	290.148	-1.804		20	1	7	5	7
ZINC000104709580	N=c1n2c3ccccc3n1CC(O)Cn1c3ccccc3n(c1=N)CC(O)C2	378.18	0.594		28	5	0	4	8
CHEMBL1800452	CC(C)c1cc(nc(N)n1)c2cc(ccc2O)N3C[C@H](O)[C@@H](O)C3	330.169	1.097		24	3	3	4	7
CHEMBL3808826	OCC(CO)(CO)Nc1nnc2nncn2n1	241.092	-2.958		17	2	5	4	10
ZINC000003045201	O=C(NN1C(=O)c2cccc3c(NC(CO)(CO)CO)ccc(c32)C1=O)c1ccccc1	435.143	0.908		32	4	7	5	7
CHEMBL3707449	CN(C)CC(=O)OC[C@@H](O)[C@@H](O)[C@H](O)[C@@H](O)C(=O)O	281.111	-3.381		19	0	8	5	8
CHEMBL388725	Oc1ccc(CCS(=O)(=O)CS(=O)(=O)CCc2ccc(O)c(O)c2)cc1O	416.06	1.081		27	2	8	4	8
CHEMBL3953240	FC(F)(F)CNc1nc(Nc2cccc(c2)C#N)nc3c(\C=C\4/NC(=O)NC4=O)cnn13	443.107	1.894		32	4	5	4	9
CHEMBL2000861	NC1=C(C(=O)O)C(=O)C(=CC1=O)Nc2c(O)cccc2C(=O)O	318.049	-0.165		23	2	4	5	7
CHEMBL1193540	NC1=NCN(C(=N1)N)c2cccc(\C=C\c3cccc(c3)N4CN=C(N)N=C4N)c2	402.203	0.671		30	4	4	4	10
CHEMBL1564228	Cl.NCCCC[C@H](NC(=O)C1CCNCC1)c2oc(CN)nn2	346.188	0.236		23	2	8	4	7
ZINC000016189558	COC(=O)/C(=N\Nc1ccccc1[N+](=O)[O-])[C@@H](O)[C@H](O)[C@H](O)CO	343.102	-1.389		24	1	8	5	10
ZINC000072408900	Nc1nc2c(c(N[C@@H]3CS(=O)(=O)C[C@H]3O)n1)CCNCC2	313.121	-1.683		21	3	2	4	8
ZINC000031750813	n1n[nH]c(C2=NN=C(c3nnn[nH]3)NN2)n1	220.068	-3.071		16	3	2	4	10
CHEMBL1744202	Cn1cc(cc1C=O)c2csc(N=C(N)N)n2.OC(=O)\C=C/C(=O)O	365.079	0.578		25	2	5	4	7
ZINC000005350690	CC(C)(Oc1ccc(Cl)cc1)C(=O)O[C@@H]1O[C@H](C(=O)O)[C@@H](O)[C@H](O)[C@H]1O	390.072	-0.067		26	2	5	4	8
CHEMBL17844	CC(C)(C)NCC(O)COc1nsnc1NCCO	290.141	0.07		19	1	8	4	8
CHEMBL148304	NC1=NC(=C(C(=O)N1CCOCP(=O)(O)O)c2ccccc2)N	340.094	0.226		23	2	6	4	7
ZINC000244794798	Nc1ccsc1C(=O)N[C@H]1C[C@@H](c2cc(NCCO)ncn2)C1	333.126	1.201		23	3	6	4	7
ZINC000033445666	CCOC(=O)C1=C(C)N=C(NN)N[C@@H]1c1ccc(O)c(OCC)c1	334.164	1.092		24	2	5	4	8
CHEMBL359163	C[C@H](O)[C@H]1O[C@@H](Oc2ccc(\C=C(/C)\C(=O)N3CCN(C)CC3)cc2O)[C@@H](O)[C@@H]1O	422.205	-0.224		30	3	5	4	8
CHEMBL1978716	CC(C)c1cccc(C)c1NC(=O)C(=O)NNC(=O)c2sc(NNC(=O)C)nc2C	432.158	1.746		30	2	5	5	7
CHEMBL2207703	CNC1=CC(=O)c2c(O)c3[C@@H](O)C[C@@](C)(O)Cc3c(O)c2C1=O	319.106	0.311		23	3	1	5	7
ZINC000068604779	NCCN1CCCN(CCN)CCN(CCN)CCCN(CCN)CC1	372.369	-2.177		26	1	8	4	8
CHEMBL3644869	CCN1C(=C(C(=O)NC)C(=O)c2ccc(nc12)C#CC(C)(O)CO)N	344.148	-0.547		25	2	3	4	7
CHEMBL87643	COC1OC(CNC(=O)C(NC(=O)C)C(C)(C)SN=O)C(O)C(O)C1O	395.136	-1.745		26	1	8	5	10
CHEMBL3189728	Cl.Cc1nc(O)nc(O)c1\C=N\NC(=O)[C@@H](N)Cc2ccccc2	351.11	0.638		24	2	5	4	7
ZINC000220973999	C/C(=N\NC1=NCCN1)c1cccc(/C(C)=N/NC2=NCCN2)n1	327.192	-0.373		24	3	4	4	9
CHEMBL3216619	Cl.Cl.CN(C1CN=C(NC(=O)N)NC1=O)C(=O)C[C@@H](N)CS(=O)(=O)CCN	449.101	-3.098		27	1	7	5	8
CHEMBL218765	N[C@@H]1C[C@H](N)CN(C1)c2nc(Nc3ccc(Br)cc3)nc(n2)N4C[C@H](N)C[C@H](N)C4	476.176	0.107		30	4	4	5	10
ZINC000001024582	COc1cc(/C=N/NC(=S)N/N=C/c2ccc(O)c(OC)c2)ccc1O	374.105	1.947		26	2	6	4	7
ZINC000575598468	O=C(O)[C@H]1O[C@@H](Oc2cc3oc(O)nc3cc2Cl)[C@H](O)[C@@H](O)[C@@H]1O	361.02	-0.542		24	3	3	5	9
CHEMBL290684	OC1CN=CNc2c1ncn2CCCCC(C(=O)O)C(=O)O	310.128	0.326		22	2	7	4	7
ZINC000003001776	Cc1ncc(CO)c(/C=N/N=C/c2ccc(O)c(O)c2)c1O	301.106	1.452		22	2	4	4	7
CHEMBL578567	CCCOc1c(OCCC)c(sc1C(=O)NN)C(=O)NN	316.121	0.533		21	1	8	4	7
CHEMBL1562898	Nc1cc(N)nc(SCC(=O)NNC(=O)Cc2ccccc2)n1	332.106	0.123		23	2	5	4	7
CHEMBL2207695	CCCNC1=CC(=O)c2c(O)c3[C@@H](O)C[C@@](C)(O)Cc3c(O)c2C1=O	347.137	1.091		25	3	3	5	7
CHEMBL542072	Cl.Cn1nc2c3c(O)ccc(O)c3C(=O)c4c(NCCN)ccc1c24	360.099	1.988		25	4	3	4	7
CHEMBL3629147	CCCc1cnc(N)c(CN\C(=N/C#N)\Nc2ccc3NC(=O)Oc3c2)n1	366.155	1.485		27	3	5	4	7
CHEMBL3104726	Oc1cc(CCNC2=CC(=O)c3cccnc3C2=O)cc(O)c1O	326.09	1.294		24	3	4	4	7
ZINC000136705467	N=C1C=CC2=CC(S(=O)(=O)O)=CC(=O)C2=C1NNc1ccc([N+](=O)[O-])cc1S(=O)(=O)O	468.005	0.882		31	3	6	5	10
ZINC001529138614	CNc1nc(C(N)=O)c(NC(=O)[C@@H](N)Cc2ccc(OC)cc2)s1	349.121	0.801		24	2	7	4	7
ZINC000006222168	NN1C(=O)c2cccc3c(NC(CO)(CO)CO)ccc(c32)C1=O	331.117	-0.563		24	3	5	5	7
CHEMBL496900	CC(C)C[C@H](NC(=O)[C@H](N)[C@@H](O)c1ccc(cc1)[N+](=O)[O-])C(=O)NO	354.154	-0.008		25	1	8	5	7
ZINC000585092729	O=[N+]([O-])c1c(N[C@@H]2C=C[C@H](CO)C2)ncnc1N[C@@H]1C=C[C@H](CO)C1	347.159	1.083		25	3	7	4	8
CHEMBL609498	NC(CCC(=O)O)C(=O)OC[C@H]1OC(O)[C@H](O)[C@@H]1O	279.095	-2.839		19	1	6	5	8
CHEMBL438830	N[C@@H]1C[C@H](N)CN(C1)c2nc(Cl)nc(n2)N3C[C@H](N)C[C@H](N)C3	341.184	-1.746		23	3	2	4	9
ZINC000003844563	CCOC(=O)CNc1cc(NCC(=O)OCC)c(N)cc1N	310.164	0.801		22	1	8	4	8
CHEMBL145556	OC(=O)CCCC(=O)Nc1cc(cc2cc(cc(O)c12)S(=O)(=O)O)S(=O)(=O)O	433.014	1.232		28	2	7	5	7
ZINC000136213336	CCO/C(O)=C(/[N+]#N)C(=O)NS(=O)(=O)NC1CC(C)(C)NC(C)(C)C1	376.165	0.863		25	1	6	4	7
CHEMBL3317459	CC(=O)C1(CCN2CCCC2)CCOC1=O.OC(C(O)C(=O)O)C(=O)O	375.153	-1.128		26	2	7	4	8
ZINC000004653727	O=C(O)c1sc(C(=O)O)c(OCCO)c1OCCO	292.025	-0.113		19	1	8	4	7
CHEMBL1201892	Cl.COC1C(N)Cn2c1c(COC(=N)O)c3C(=O)C(=C(C)C(=O)c23)N	370.104	0.559		25	3	3	4	8
CHEMBL300527	CN(C)S(=O)(=O)NC(=N)CCSCc1csc(N=C(N)N)n1	365.076	0.045		22	1	8	4	7

## Sheet: CTP Synthase
ID	SMILES	MW	logP	Affinity	numAtoms	numRings	numRotBonds	numHDon	numHAcc
ZINC000001042131	Nc1cnn([C@@H]2O[C@@H](CO)[C@@H](O)[C@H]2O)c(=O)n1	244.081	-3.168	-6.9	17	2	2	4	9
CHEMBL348215	CCOC(=O)Cc1c(N)nc(N)nc1OCCOCP(=O)(O)O	350.099	-0.723	-6.7	23	1	9	4	9
ZINC000020636266	COC(=O)c1cc(NC(=O)C[C@@H]2SC(NC(=N)N)=NC2=O)cc(C(=O)OC)c1	407.09	0.069	-8	28	2	5	4	8
CHEMBL611894	CCC[C@@H](O)[C@H]1OC([C@H](O)[C@@H]1O)N2C=CC(=O)c3c(N)ncnc23	336.143	-0.846	-7.3	24	3	4	4	9
CHEMBL300485	NC(=S)c1cn(COC(CO)CO)c2ncnc(N)c12	297.09	-1.025	-6.2	20	2	6	4	8
CHEMBL3126876	NC1=Nc2c(C(=O)N1)c(cn2[C@@H]3O[C@H](CO)[C@@H](O)[C@H]3O)c4ccsc4	364.084	-0.353	-7.7	25	4	3	5	9
ZINC000004257542	O=c1c2ccc(O[C@H]3O[C@@H](CO)[C@@H](O)[C@@H](O)[C@@H]3O)cc2occ1-c1ccc2c(c1)OCCCO2	472.137	0.8	-8.6	34	5	4	4	10
ZINC000077270967	Nc1ncnc2c1c(Cc1ccccc1)nn2[C@@H]1O[C@H](CO)[C@H](O)[C@@H]1O	357.144	-0.389	-7.8	26	4	4	4	9
ZINC000242688391	COc1cc(C(=O)O)ccc1O[C@@H]1O[C@H](CO)[C@H](O)[C@H](O)[C@H]1NC(C)=O	371.122	-1.284	-7.6	26	2	6	5	8
ZINC000031163748	CC(C)(O)[C@@H]1Oc2cc3oc(=O)ccc3cc2[C@H]1O[C@@H]1O[C@H](CO)[C@@H](O)[C@H](O)[C@H]1O	424.137	-0.818	-7.9	30	4	4	5	10
ZINC001560407696	Nc1nc(/C(=C/CC(=O)O)C(=O)NC2=C([O])N3C(C(=O)O)=CCS[C@H]23)cs1	409.028	0.656	-7.9	27	3	6	4	8
CHEMBL3278574	CCO[C@H]1O[C@H](CO)[C@@H](O)[C@H](O)[C@H]1NC(=O)N(CC)N=O	307.138	-1.457	-6	21	1	6	4	8
ZINC000004917336	C=CC/C(=N\OS(=O)(=O)O)S[C@@H]1O[C@@H](CO)[C@@H](O)[C@@H](O)[C@H]1O	359.034	-1.771	-6.9	22	1	6	5	10
CHEMBL2170972	Nc1ncnc2c1ncn2[C@@H]3O[C@H](CNCc4cccs4)[C@@H](O)[C@H]3O	362.116	-0.121	-7.3	25	4	5	4	10
ZINC000257287304	COc1ccc(C(=O)N[C@@H]2CC[C@@H](n3cc(F)c(O)nc3=O)[C@@H](O)[C@@H]2O)cc1	393.134	-0.048	-7.5	28	3	4	4	8
CHEMBL473356	CC\C=C/[C@H](O)[C@H](O)C1=C(C)C(=O)[C@@]2(O1)[C@@H](O)[C@](NC2=O)(OC)C(O)c3ccccc3	433.174	-0.146	-7.6	31	3	7	5	8
CHEMBL2112804	NC1=NC(=O)N(C=C1)[C@@H]2C[C@H](CO)C(CO)(CO)O2	271.117	-1.924	-6.1	19	2	4	4	8
CHEMBL566812	CC1=CN([C@H]2CC[C@@H](COP(=O)(O)OP(=O)(O)OP(=O)(O)O)O2)C(=O)NC1=O	465.994	-0.134	-7.9	28	2	8	5	10
CHEMBL3228413	OC[C@H]1O[C@@H](NC(=O)N(CCCl)N=O)[C@H](O)[C@@H](O)[C@@H]1O	313.068	-2.282	-7	20	1	5	5	8
CHEMBL1778418	COc1cc(\C=C\C(=O)O[C@@H]2O[C@H](CO)[C@@H](O)[C@H](O)[C@H]2O)ccc1O	356.111	-1.243	-7.8	25	2	5	5	9
CHEMBL3809698	NS(=O)(=O)c1ccc(N\N=C\2/SC(=NC2=O)Nc3ccc(cc3)S(=O)(=O)N)cc1	454.019	0.448	-9.3	29	3	5	4	9
ZINC000031719312	Nc1cnc(N2CCN(c3ncc(N)cc3N)CC2)c(N)c1	300.181	0.132	-7.2	22	3	2	4	8
ZINC000001608325	CCOC(=O)[C@H]1CS[C@@H](c2c(COP(=O)(O)O)cnc(C)c2O)N1	378.065	0.972	-6.8	24	2	6	4	8
CHEMBL611289	Cc1cccc(CCOc2nc(N)c3ncn(C4O[C@H](CO)[C@@H](O)[C@H]4O)c3n2)c1	401.17	-0.05	-8.6	29	4	6	4	10
CHEMBL3621247	ONC(=O)CCCNC(=O)Cn1cnc2c(NCc3ccccc3)ncnc12	383.171	0.84	-8.3	28	3	9	4	8
CHEMBL4104606	CN(CC(=O)N)Cc1cncc(c1)c2ccc(cc2)N3CCOCC3.O[C@H]([C@@H](O)C(=O)O)C(=O)O	490.206	-0.62	-4.6	35	3	9	5	9
ZINC000584578739	C[C@@H]1CN([C@@H]2C[C@@H](O)[C@H](CO[P@](=O)(O)OP(=O)(O)O)O2)C(=O)NC1=O	404.039	-1.124	-7.5	25	2	6	5	8
ZINC000019322868	CC12CN3CC(C)(CN(C1)C3[C@@H](O)[C@H](O)[C@H](O)[C@H](O)CO)C2=O	330.179	-3.025	-6.7	23	4	5	5	8
CHEMBL3335037	COc1cc(O)c2C(=O)[C@]34O[C@]3([C@@H](O)[C@](C)(O)[C@H](O)[C@H]4O)C(=O)c2c1	352.079	-1.865	-6.6	25	4	1	5	9
ZINC000095981282	CNc1snc(C)c1C(=O)NCCNS(=O)(=O)c1sc(=O)[nH]c1C	391.044	0.26	-7.3	24	2	7	4	8
CHEMBL3246743	CNCC(O)COC(=O)c1ccc2OCOc2c1.OC(=O)C(=O)O	343.09	-0.692	-3.7	24	2	5	4	8
CHEMBL2064310	OC[C@H]1O[C@H](Oc2ccc(cc2F)n3ccc4cc(ccc34)[N+](=O)[O-])[C@@H](O)[C@@H](O)[C@@H]1O	434.113	0.856	-8.9	31	4	5	4	9
ZINC000012661595	CN1CCN(c2nc3c(nc[nH]c3=O)n2[C@@H]2O[C@@H](CO)[C@H](O)[C@@H]2O)CC1	366.165	-2.517	-7	26	4	3	4	10
CHEMBL1170269	COC(=O)c1cc(cc(c1)c2ccc(O[C@H]3O[C@H](CO)[C@@H](O)[C@H](O)[C@@H]3O)cc2)C(=O)OC	448.137	0.105	-7.8	32	3	6	4	10
CHEMBL1917470	OC[C@H]1O[C@H](OCc2cn(nn2)c3cccc(F)c3)[C@@H](O)[C@@H](O)[C@@H]1O	355.118	-1.277	-8	25	3	5	4	9
CHEMBL3248976	CN1C(=O)NC(=O)N([C@@H]2O[C@H](CO)[C@@H](O)[C@@H]2O)C1=O	275.075	-4.153	-7	19	2	2	4	9
CHEMBL407574	COC(=O)c1cncnc1N[C@@H]2O[C@H](CN)[C@@H](O)[C@H]2O	284.112	-1.919	-6.3	20	2	4	4	9
CHEMBL3143144	OC[C@H]1O[C@H]([C@@H](O)[C@@H]1O)N2C=C(C(CCl)N=[N+]=[N-])C(=O)NC2=O	347.063	-1.262	-7.1	23	2	5	4	8
CHEMBL402607	CNC(=O)[C@@]12C[C@@H]1[C@H]([C@H](O)[C@@H]2O)n3cnc4c(NOC)nc(Cl)nc34	368.1	-0.518	-8.4	25	4	4	4	9
ZINC001772492702	C[C@@H](O)[C@@H](O)O[C@H](COC(=O)[C@@H]1CCCN1C(=O)OCc1ccccc1)[C@@H](O)CO	427.184	-0.232	-7.6	30	2	10	4	9
CHEMBL2409328	OC[C@@H]1[C@@H](O)[C@H](O)[C@@H](O)CN1Cc2cn(CC34CC5CC(CC(C5)C3)C4)nn2	392.242	-0.246	-8.1	28	6	5	4	8
CHEMBL33064	N\C(=N\O)\c1cn(COCCO)c2ncnc(N)c12	266.113	-0.926	-6.3	19	2	5	4	8
CHEMBL1901348	CCCSc1nc(N)nc2c1ncn2C3OC(CO)C(O)C3O	341.116	-0.478	-7.2	23	3	5	4	10
CHEMBL3973556	NS(=O)(=O)OC[C@H]1C[C@@H](Nc2cc(N[C@@H]3CCC[C@H]3OCc4ccccc4)ncn2)[C@H](O)[C@@H]1O	493.2	0.769	-9.1	34	4	10	5	10
ZINC000253535344	Cn1cc([C@H](NC(=O)Cc2cc(O)nc(N)n2)[C@H]2C[C@@H](O)C2)cn1	332.16	-0.331	-8	24	3	5	4	8
ZINC000005811012	CC(C)(C)N/N=N/c1cn([C@H]2O[C@@H](CO)[C@@H](O)[C@H]2O)c(=O)[nH]c1=O	343.149	-1.465	-7.5	24	2	4	5	9
ZINC000004758473	C[N+](C)(C)c1nc(N)nc2c1ncn2[C@H]1O[C@@H](CO)[C@@H](O)[C@H]1O	325.162	-1.783	-7.5	23	3	3	4	9
ZINC000019323200	CC(C)C12CN3CC(C(C)C)(CN(C1)C3[C@H](O)[C@H](O)[C@H](O)[C@H](O)CO)C2=O	386.242	-1.753	-6.9	27	4	7	5	8
CHEMBL3526659	COc1cc(\C=C\C(=O)O[C@@H]2C[C@@](O)(C[C@@H](O)[C@H]2O)C(=O)O)ccc1O	368.111	-0.343	-8	26	2	5	5	8
CHEMBL2023964	C[C@@]1(O)[C@H](O)[C@@H](CO)O[C@H]1n2cc(F)c3c(N)ncnc23	298.108	-0.846	-7.5	21	3	2	4	8
ZINC000003898647	O=[N+]([O-])c1ccccc1N[C@@H]1O[C@@H](CO)[C@@H](O)[C@@H](O)[C@@H]1O	300.096	-1.193	-6.9	21	2	4	5	8
CHEMBL2113450	CCNC(=O)[C@H]1O[C@H]([C@H](O)[C@@H]1O)n2cnc3c(N)nc(nc23)C#CCCCc4ccccc4	450.202	0.538	-7.6	33	4	6	4	9
CHEMBL2371876	COC(=O)[C@@H]1Cc2ccc(Oc3cc(C[C@H](N)C(=O)N[C@@H]([C@@H](C)O)C(=O)N1)ccc3O)cc2	457.185	0.134	-7.3	33	4	2	5	8
ZINC000019331681	CC1(C)C2([N+](=O)[O-])CN3CC1([N+](=O)[O-])CN(C2)C3[C@@H](O)[C@H](O)[C@@H](O)CO	376.159	-2.91	-6.1	26	4	6	4	10
CHEMBL275751	NCCCNc1ccc2c(CNCCO)nn3c4cccc(O)c4C(=O)c1c23	381.18	0.987	-6.1	28	4	8	5	8
ZINC000017418524	CN(C)c1nc2c(nc[nH]c2=O)n1[C@@H]1O[C@@H](CO)[C@@H](O)[C@@H]1O	311.123	-2.203	-6.3	22	3	3	4	9
CHEMBL515290	CC(C)C(=O)O[C@H]1C=C2[C@@H](NC(=O)c3c(O)c4OCOc4cc23)[C@H](O)[C@@H]1O	377.111	-0.08	-8	27	4	2	4	8
ZINC000105429837	COc1ccc(/C=C2\SC(=S)N(CC(=O)N[C@H]3[C@H](O)O[C@@H](CO)[C@@H](O)[C@H]3O)C2=O)cc1	470.082	-1.188	-7.4	31	3	6	5	10
CHEMBL2147480	NC1=Nc2c(ncn2COCCOP(=O)(N)N)C(=O)N1	303.084	-1.282	-7	20	2	6	4	8
CHEMBL502805	Cc1nc(NC(=O)c2ccc(Br)cc2)sc1C[C@@H]3O[C@H](CO)[C@H](O)[C@H](O)[C@H]3O	472.03	0.851	-7.4	28	3	5	5	8
CHEMBL610729	NC1=NC(=O)C2C(N=C(N2C3O[C@H](CO)[C@@H](O)[C@H]3O)c4ccccc4)C(=O)N1	389.134	-3.104	-7.3	28	4	3	5	9
ZINC000006568063	O=C1/C(=C\c2ccccc2)SC(=S)N1[C@H]1O[C@@H](CO)[C@@H](O)[C@@H](O)[C@H]1O	383.05	-0.312	-6.4	25	3	3	4	8
CHEMBL1790577	COc1ccc(CC(N)C(=O)N[C@@H]2[C@@H](CO)C[C@H]([C@@H]2O)n3cnc4c(ncnc34)N(C)C)cc1	469.244	-0.13	-8.6	34	4	8	4	10
ZINC000096320557	CCOC(=O)C1=C(COC(=O)CNS(=O)(=O)c2ccc(NC(C)=O)cc2)NC(=O)N[C@@H]1C	468.131	-0.015	-8.1	32	2	9	4	8
CHEMBL1490172	Nc1c(cnc2nnnn12)C(=O)Nc3ccc(cc3)[As](=O)(O)O	379.001	-2.085	n	23	3	3	4	8
CHEMBL1604240	Nc1nc(N)nc(CCCc2nc(N)nc(N)n2)n1	262.14	-1.439	-7.5	19	2	4	4	10
CHEMBL299863	Nc1nc(N)c2N3C(CCc2n1)CC(C3=O)c4ccc(cc4)C(=O)NC(CCC(=O)O)C(=O)O	468.176	0.524	-8.1	34	4	7	5	8
ZINC000257249683	Cc1cn([C@@H]2C[C@@H](CNC(=O)CNC(=O)OC(C)(C)C)[C@@H](O)[C@@H]2O)c(O)nc1=O	412.196	-0.819	-7.4	29	2	5	5	9
ZINC000038266129	COc1ccc(O[C@@H]2O[C@H](CO)[C@@H](O)[C@H](O)[C@H]2O)cc1OC	316.116	-1.118	-7.3	22	2	5	4	8
ZINC000257357278	C[C@]1([C@@H]2CC(=O)C3=C(O)[C@H](C(N)=O)C(=O)C[C@H]3[C@H]2O)OC(=O)c2c1cccc2O	401.111	0.23	-8.7	29	4	2	4	8
ZINC000426490201	Cc1cc(O)nc(NCCNC(=O)NCCSc2nncn2C)n1	352.143	0.123	-7.3	24	2	8	4	9
ZINC000003956731	O=[N+]([O-])c1ccccc1O[C@@H]1O[C@@H](CO)[C@@H](O)[C@@H](O)[C@H]1O	301.08	-1.227	-7.3	21	2	4	4	8
CHEMBL591950	OC[C@H]1O[C@H]([C@H](O)[C@@H](O)[C@@H]1O)c2ccc(Cl)c(Cc3nnc(s3)c4ccnnc4)c2	450.076	0.754	-9	30	4	5	4	10
ZINC000169684064	NC(=O)C[C@]1(C(=O)O)N[C@H](c2ccccc2O)[C@@H]2C(=O)N(c3ccccc3[N+](=O)[O-])C(=O)[C@@H]21	454.112	0.449	-8.4	33	4	6	4	8
ZINC000097636574	O=C(O)CNc1ncc(CN2CCN(CCO)C[C@H](O)C2)cn1	325.175	-1.556	-7.7	23	2	7	4	8
ZINC000022059268	O=C(O)CN1CCN(CC(=O)O)CCN(CC(=O)O)CCN(CC(=O)O)CC1	404.191	-2.454	-6	28	1	8	4	8
CHEMBL1818308	Cc1nc(NC(=O)Cc2ccccc2)sc1[C@@H]3O[C@H](CO)[C@H](O)[C@H](O)[C@H]3O	394.12	0.148	-7.4	27	3	5	5	8
CHEMBL4073644	CC(=O)NC[C@H]1O[C@H]([C@H](O)[C@@H]1O)n2cnc3c(N)nc(Cl)nc23	342.084	-1.183	-7.6	23	3	3	4	9
ZINC000223652489	Nc1nnc(CCC(=O)N[C@@H]2COCC[C@@H]2OCC(=O)O)c(=O)[nH]1	341.134	-1.945	-7.5	24	2	7	4	8
CHEMBL2112863	CNc1ncnc2c1ncn2[C@H]3C[C@H](OP(=O)(O)O)[C@]4(COP(=O)(O)O)C[C@H]34	435.071	0.406	-7.3	28	4	7	5	9
ZINC000096766502	Cn1c2nc(NN[C@H](O)/C=C\C(=O)O)n(C/C=C/c3ccccc3)c2c(=O)n(C)c1=O	426.165	0.023	-8.9	31	3	8	4	10
CHEMBL2152456	C[C@@H]1[C@H]2C[C@H](O[C@@H]3O[C@H](CO)[C@@H](O)[C@H](O)[C@H]3O)[C@@](C)(O)[C@H]2COC1=O	362.158	-2.248	-7.9	25	3	3	5	9
ZINC000006178434	CN(/N=C/C(=N\Nc1ccccc1)[C@H](O)[C@@H](O)[C@H](O)CO)c1ccccc1	372.18	0.652	-7.3	27	2	9	5	8
CHEMBL458398	CO\N=C/c1ccc(O[C@@H]2O[C@H](CO)[C@@H](O)[C@H](O)[C@H]2O)cc1	313.116	-1.154	-7.5	22	2	5	4	8
CHEMBL85024	Nc1ncnc2c1ncn2[C@@H]3C[C@@H](OCP(=O)(O)CP(=O)(O)O)[C@@H]4C[C@H]34	403.081	0.738	-7.8	26	4	6	4	8
CHEMBL351127	CCCCOC(=O)C(NC(=O)[C@@H](N)Cc1ccc(O)cc1)[C@H]2C[C@@H](O)[C@@H](O)[C@@H](C)O2	424.221	-0.011	-7.4	30	2	9	5	8
CHEMBL565453	C[C@H]1CN(CCN1\C(=N\C#N)\Nc2cccc(c2)S(=O)(=O)NCCO)c3ncnc4[nH]cc(C)c34	497.196	0.997	-7.2	35	4	6	4	8
ZINC000004529970	N=Nc1nc(NN)nc(NN)n1	169.082	-0.895	-6.4	12	1	3	5	9
CHEMBL17916	CC(C)(C)NCC(O)COc1nsnc1N(CCO)CC(=O)O	348.147	-0.451	-6.4	23	1	10	4	9
ZINC000103768074	CCOC(=O)c1[nH]c(=O)[nH]c1CSc1nc(O)c(CC)c(O)n1	340.084	0.936	-7.5	23	2	6	4	8
CHEMBL3929733	CC(C)(CO)CNc1cc(NC2CC2)n3ncc(\C=C\4/NC(=O)NC4=O)c3n1	385.186	0.914	-8	28	4	7	5	8
ZINC000016384132	O=[N+]([O-])c1c(N/N=C/[C@H](O)[C@@H](O)[C@@H](O)CO)cccc1C(F)(F)F	353.083	0.086	-7.2	24	1	7	5	8
ZINC000245227885	COC(=O)c1ccc2ccccc2c1O[C@@H]1O[C@H](CO)[C@H](O)[C@@H](O)[C@H]1NC(C)=O	405.142	-0.051	-7	29	3	5	4	8
CHEMBL1973559	N\C(=C(/NC(=O)C(=O)N\C(=C(/N)\C#N)\C#N)\C#N)\C#N	270.061	-2.346	-6.8	20	0	2	4	8
CHEMBL1964845	Cl.OCC1OC(C(O)C1O)c2nc(cs2)C3=NCCCN3	335.071	-0.541	-7.2	21	3	3	4	8
CHEMBL196725	CCn1c2ccccc2c3cc(\C=N\O[C@@H]4OC(CO)C(O)[C@H](O)C4O)ccc13	400.163	0.965	-8.5	29	4	5	4	8
CHEMBL3392188	[I-].CC(N)CC[S+](C)C[C@H]1O[C@H]([C@H](O)[C@@H]1O)n2cnc3c(N)ncnc23	496.075	-3.983	-1	26	3	6	4	9
CHEMBL3278565	CO[C@H]1O[C@H](CO)[C@@H](O)[C@H](O)[C@H]1NC(=O)N(C)N=O	279.107	-2.237	-6.4	19	1	4	4	8
ZINC000253499711	Cc1ccc(Nc2nc3c(ncnc3O)n2[C@@H]2O[C@H](CO)[C@H](O)[C@@H]2O)cc1	373.139	0.195	-8.1	27	4	4	5	10
CHEMBL3237971	OC[C@H]1O[C@H]([C@H](O)[C@@H](O)[C@@H]1O)c2nc(n[nH]2)c3ccc(cc3)[N+](=O)[O-]	352.102	-1.105	-7.9	25	3	4	5	9
CHEMBL13087	CP(=O)(O)C(O)c1cc(cc2nc(O)c(O)nc12)[N+](=O)[O-]	315.026	0.84	-7.2	21	2	3	4	8
CHEMBL1928047	OCC[n+]1cccc(\C=C\[C@H]2[C@@H](C=C)[C@H](O[C@@H]3O[C@H](CO)[C@@H](O)[C@H](O)[C@H]3O)OC=C2C(=O)[O-])c1	479.179	-2.795	-8.2	34	3	9	5	10
ZINC000102921292	CC1=C(NC(=O)/C(=N/NC(=S)NN)C2C(=O)CC(C)(C)CC2=O)C(=O)c2ccccc2C1=O	469.142	0.724	-7.8	33	3	4	4	8
CHEMBL2420978	NC1=Nc2c(ncn2[C@H]3CN(C[C@H]3O)C(=O)CP(=O)(O)O)C(=O)N1	358.079	-2.376	-7.6	24	3	3	5	8
ZINC000038682914	Nn1c(CCCCc2n[nH]c(=S)n2N)n[nH]c1=S	286.078	0.188	-6.8	18	2	5	4	8
CHEMBL4081811	CC(=O)N[C@@H]1[C@H](C=C(O[C@H]1[C@H](O)[C@H](O)Cn2cc(nn2)c3ccc(cc3)C(=O)O)C(=O)O)N=[N+]=[N-]	487.145	-0.084	-8.8	35	3	9	5	10
CHEMBL1162111	CS[C@@H]1O[C@H](CO)[C@H](O)[C@H](O)[C@H]1OS(=O)(=O)O	290.013	-2.024	-6.1	17	1	4	4	8
CHEMBL154233	OC(=O)[C@H](CNC(=O)c1ccc2c(cnn2CCNC3=NCCN3)c1)NC(=O)OCc4ccccc4	493.207	0.695	-8.2	36	4	10	5	9
ZINC000034554785	CC(=O)N[C@@H]1[C@@H](O)[C@H](O)[C@@H](CO)O[C@H]1OC1=C[C@H]2OC(=O)C=C(C)[C@H]2C=C1	381.142	-1.112	-7.4	27	3	4	4	8
CHEMBL1443447	O.Cl.CN[C@@H]1[C@H](O)[C@H](NC)[C@H]2O[C@]3(O)[C@@H](O[C@H](C)CC3=O)O[C@@H]2[C@H]1O	386.146	-3.328	-1.4	25	3	2	5	9
CHEMBL3273911	COc1ccc2c3CCc4cnn([C@H]5O[C@H](CO)[C@@H](O)[C@H](O)[C@H]5O)c4c3ccc2c1	412.163	0.783	-8.2	30	5	3	4	8
CHEMBL3144476	Nc1ncnc2c1ncn2[C@H]3C[C@H](OP(=S)(O)O)[C@@H](COP(=S)(O)O)O3	442.989	-0.484	-8	26	3	6	5	10
ZINC000100299950	O=S(=O)(O)c1ccc2c(c1)[C@@H](S(=O)(=O)O)CC(=N\O)/C2=N/O	349.988	0.274	-6.9	22	2	2	4	8
CHEMBL196794	OCC1O[C@@H](O\N=C\c2ccc(OCc3ccccc3)cc2)C(O)[C@@H](O)C1O	389.147	0.416	-7.8	28	3	7	4	8
CHEMBL2362309	OC1C(O)C(C(O)C(O)C1[N+](=O)[O-])[N+](=O)[O-]	238.044	-3.266	-6.1	16	1	2	4	8
ZINC000004705964	O=c1cnn([C@@H]2O[C@@H](COP(=O)(O)O)[C@@H](O)[C@@H]2O)c(=O)[nH]1	325.031	-3.34	-7	21	2	4	5	9
ZINC000035363826	COC(=O)C1=CO[C@H](O[C@H]2O[C@@H](CO)[C@H](O)[C@@H](O)[C@H]2O)[C@H]2[C@H](C)CC(=O)[C@@H]12	388.137	-1.943	-8.1	27	3	4	4	10
CHEMBL1090924	NC(=O)c1nc(Nc2ccc(cc2)C(F)(F)F)nn1[C@@H]3O[C@H](CO)[C@@H](O)[C@H]3O	403.11	-0.249	-8	28	3	5	5	9
ZINC000219968783	COCc1nc(NCCc2nc(N)cc(O)n2)cc(C2CC(N)C2)n1	345.191	0.56	-8.2	25	3	7	4	9
CHEMBL2064326	CCOC1=C(Nc2ccc(O[C@H]3O[C@H](CO)[C@@H](O)[C@H](O)[C@@H]3O)c(Cl)c2)C(=O)C1=O	429.083	-0.743	-8.2	29	3	7	5	10
CHEMBL1615533	CS(=O)(=O)CC[C@H](N)C(=O)N[C@H](CO)[C@@H](O)c1ccc(cc1)[N+](=O)[O-]	375.11	-1.133	-6.9	25	1	9	4	8
CHEMBL1739889	CN(C)[C@H]1[C@@H]2C[C@@H]3Cc4c(ncc(O)c4C(=O)C3=C(O)[C@]2(O)C(=O)C(=C1O)C(=O)N)N(C)C	458.18	-0.418		33	4	3	5	10
CHEMBL1917310	COc1cccc(Cn2cc(CO[C@H]3O[C@H](CO)[C@@H](O)[C@H](O)[C@@H]3O)nn2)c1	381.154	-1.349		27	3	7	4	10
CHEMBL318832	C[S+]([O-])CSC[C@H](CO)NC(=O)\C=C\c1c(C)nc(O)nc1O	361.077	-0.244		23	1	8	4	8
ZINC000005541123	C[C@H](O)[C@H]1O[C@@H](n2cnc3c2nc[nH]c3=S)[C@@H](O)[C@H]1O	298.074	-0.511		20	3	2	4	8
CHEMBL1902957	Cc1cc(CNC[C@H]2O[C@H]([C@H](O)[C@@H]2O)n3cnc(n3)C(=O)N)c(C)n1c4cccnc4	427.197	-0.411		31	4	7	4	10
ZINC000003870485	O=C1CC(=O)N([C@H]2O[C@@H](COP(=O)(O)O)[C@@H](O)[C@H]2O)C(=O)N1	340.031	-2.989		22	2	4	5	8
CHEMBL163241	Nc1nc(Cl)nc2c1ncn2CCC(COP(=O)(O)O)COP(=O)(O)O	431.016	0.287		26	2	9	5	9
CHEMBL610050	OC[C@H]1OC([C@H](O)[C@@H]1O)n2cnc3c(NCCc4c[nH]cn4)ncnc23	361.15	-1.184		26	4	6	5	10
ZINC000005438605	CC(=O)N[C@@H]1[C@@H](O)[C@H](O)[C@@H](CO)O[C@H]1Oc1ccccc1[N+](=O)[O-]	342.106	-1.083		24	2	5	4	8
CHEMBL1650564	NCCS[As](SCCN)c1ccc(Nc2nc(N)nc(N)n2)cc1	428.055	-0.141		24	2	9	5	10
CHEMBL610685	Nc1ncnc2c1ncn2C3O[C@@H]([C@@H](O)[C@H]3O)C(=O)NCCO	324.118	-2.864		23	3	4	5	10
ZINC000004758230	C[C@@H]1O[C@@H]1C(=O)[C@]1(O)[C@H](C)[C@@H](O)[C@]23O[C@@]2([C@@H]1O)[C@@H](O)c1c(O)cccc1C3=O	392.111	-1.411		28	5	2	5	9
CHEMBL1917482	Cc1ccc(cc1)c2cn(C[C@H]3O[C@H](CO)[C@@H](O)[C@H](O)[C@@H]3O)nn2	335.148	-0.904		24	3	4	4	8
CHEMBL3544796	CC(C(=O)OC1O[C@@H]([C@@H](O)[C@H](O)[C@H]1O)C(=O)O)c2cccc(Oc3ccc(O)cc3)c2	434.121	0.723		31	3	6	5	9
CHEMBL186504	CNc1nc(NC)nc(NCc2ccc(cc2)S(=O)(=O)N)n1	323.116	0.214		22	2	6	4	8
CHEMBL1160806	O[C@H]1C[C@@H](O[C@@H]1COP(=O)(O)O)N2C=C(C(=O)NC2=O)c3cccs3	390.029	0.023		25	3	5	4	8
ZINC000025585147	COc1ccc([C@@H](O)[C@@H](NN=C(N)N)c2nc3ccc([N+](=O)[O-])cc3[nH]c2=O)cc1	413.145	0.393		30	3	7	5	8
CHEMBL3544509	OCc1cnn(c1)C2O[C@@H]([C@@H](O)[C@H](O)[C@H]2O)C(=O)O	274.08	-2.56		19	2	3	5	8
ZINC000009970915	Nc1c(Cc2c(N)n(Cc3ccccc3)c(=O)[nH]c2=O)c(=O)[nH]c(=O)n1Cc1ccccc1	446.17	0.238		33	4	6	4	8
CHEMBL3217084	Cl.Cl.CN(C1CN=C(NC2=NCCCN2)NC1=O)C(=O)C[C@@H](N)CCCCN	438.203	-1.072		28	2	7	5	8
CHEMBL464732	COc1c(O[C@@H]2O[C@@H]([C@@H](O)[C@H](O)[C@H]2O)C(=O)O)cc(O)c3C(=O)C=C(Oc13)c4ccccc4	460.101	0.445		33	4	5	5	10
CHEMBL1973897	NC1=NC(=O)N(C=C1F)C2CC(O)C(O)C(CO)O2	275.092	-2.034		19	2	2	4	8
ZINC000004261921	O=[N+]([O-])c1ccccc1S[C@@H]1O[C@H](CO)[C@H](O)[C@H](O)[C@H]1O	317.057	-0.513		21	2	4	4	8
CHEMBL3247623	NCCCCCCS[C@H]1O[C@H](CO)[C@@H](OC(=O)N)[C@H](O)[C@@H]1O	338.151	-0.858		22	1	9	5	8
CHEMBL1744429	COC(=O)CC(C)N1CCN(CC1)c2ccccn2.OC(=O)\C=C/C(=O)O.OC(=O)\C=C/C(=O)O	495.185	0.579		35	2	8	4	9
CHEMBL1851633	CO[C@H]1C[C@@](OCC=C)(O[C@@H]([C@H](O)[C@H](O)CO)[C@@H]1NC(=O)C)C(=O)O	363.153	-2.007		25	1	9	5	8
CHEMBL137366	CN(Cc1cnc2nc(N)nc(N)c2n1)c3ccc(cc3)C(=O)NC(Cc4c[nH]cn4)C(=O)O	462.188	0.369		34	4	8	5	10
ZINC000006494947	O=c1cc(O)cnn1[C@@H]1O[C@@H](CO)[C@@H](O)[C@@H]1O	244.07	-2.44		17	2	2	4	8
CHEMBL1818309	Cc1nc(NS(=O)(=O)c2ccc3ccccc3c2)sc1[C@@H]4O[C@H](CO)[C@H](O)[C@H](O)[C@H]4O	466.087	0.92	-9	31	4	5	5	9
CHEMBL10804	Nc1nc(N)c2nc(COc3ccc(cc3)C(=O)NC(CCC(=O)O)C(=O)O)cnc2n1	441.14	0.211	-8.6	32	3	9	5	10
ZINC000008814406	C[C@H](Sc1nc(N)cc(N)n1)C(=O)Nc1ccc(S(N)(=O)=O)cc1	368.073	0.408	-7.7	24	2	5	4	8
CHEMBL1984992	N1C2Nc3nonc3NC2Nc4nonc14	222.061	-0.52	-7.6	16	4	0	4	10
CHEMBL1714373	Cl.CN(C)[C@@H](CO)c1oc(nn1)[C@H](CC(=O)O)NC(=O)C2CCNCC2	391.162	-0.282	-7.7	26	2	8	4	8
ZINC000040457309	C[C@H](O)Nc1nnc(N[C@H](C)O)nn1	200.102	-1.233	-5.9	14	1	4	4	8
ZINC000017429896	Nc1nc(N)c(/N=N\c2cccc(S(=O)(=O)O)c2)c(N)n1	309.064	0.885	-7.9	21	2	3	4	9
ZINC000143703253	NS(=O)(=O)NCCNC1=NON/C1=C(/N=O)Nc1ccc(F)c(Br)c1	436.992	0.167	-7.9	25	2	7	5	9
CHEMBL1161883	N.OP1(=O)OC[C@H]2O[C@H]([C@@H](F)[C@@H]2OP(=O)(O)O1)N3C=CC(=O)NC3=O	405.014	-0.433	-1.2	25	3	1	4	10
ZINC000043771712	CCNc1nc2c(ncn2[C@H]2C[C@H](O)[C@@H](CO)O2)c(=O)[nH]1	295.128	-0.808	-7.6	21	3	4	4	8
ZINC001569992316	N=c1ccn2c(n1)O[C@@H]1[C@H](O)[C@H](COP(=O)(O)O)O[C@H]12	305.041	-1.509	-7.7	20	3	3	4	8
CHEMBL3407775	CNC(=O)[C@@]12C[C@@H]1[C@H]([C@H](O)[C@@H]2O)n3cnc4c(NC)nc(nc34)C#Cc5cccnn5	420.166	-0.913	-7.8	31	5	3	4	10
ZINC000005496158	OC[C@@H](O)[C@@H](O)[C@H](O)c1nn(-c2ccccc2)c2nc3ccccc3nc12	366.133	0.716	-8.4	27	4	5	4	8
ZINC000008825936	CNC(=O)NC(=O)[C@@H](C)OC(=O)c1cccnc1S[C@@H](C)C(=O)NC(=O)NC	411.121	0.019	-7.8	28	1	6	4	8
ZINC000072311000	CNS(=O)(=O)c1ccc(NCCCc2n[nH]c(N)n2)c([N+](=O)[O-])c1	355.106	0.248	-7.2	24	2	8	4	8
ZINC000257319707	Nc1ncnc2c1ncn2[C@@H]1[C@@H](O)[C@@H](O)C[C@H]1CNCc1ccccc1	354.18	0.481	-8.3	26	4	5	4	8
CHEMBL65177	Nc1nnc(N)c2c1ncn2CCOCP(=O)(O)O	288.074	-0.858	-6.5	19	2	5	4	8
CHEMBL1938675	CCOc1ccnc(C)c1C#Cc2c(Cl)nc(N)nc2N[C@@H]3C[C@H](CO)[C@@H](O)[C@H]3O	433.152	0.729	-7.1	30	3	5	5	9
CHEMBL3230007	CC(=O)C1=C(O)\C(=C(/O)\Nc2cccc(NC(=O)C(=O)O)c2)\C(=O)OC1=O	376.054	0.376	-8.2	27	2	4	5	9
ZINC000503919369	CC(C)(Oc1ccc([C@@H]2CC2(Cl)Cl)cc1)C(=O)O[C@H]1O[C@@H](C(=O)O)[C@H](O)[C@@H](O)[C@@H]1O	464.064	0.941	-7.8	30	3	6	4	8
ZINC000104195409	CC(=O)N[C@H]1[C@H](n2nc(-c3ccccc3)n(C3CC3)c2=S)O[C@@H](CO)[C@@H](O)[C@H]1O	420.147	0.532	-6.5	29	4	5	4	9
CHEMBL3988890	Cn1ncc2c(NCCO)nc(Nc3cccc(c3)S(=O)(=O)N)nc12	363.111	0.158	-8.1	25	3	6	4	9
ZINC000073667129	CCNc1nc(NCC)nc(NNC(=S)N[C@@H]2CCS(=O)(=O)C2)n1	374.131	-0.287	-7.6	24	2	7	5	9
ZINC000012611920	Cc1oc([C@H](O)[C@H](O)[C@@H](O)CO)cc1C(=O)OCc1ccccc1C#N	361.116	0.564	-7.9	26	2	7	4	8
ZINC000003830404	N[C@@H](C(=O)N[C@@H]1C(=O)N2C(C(=O)O)=C(CSc3cn[nH]n3)CS[C@H]12)c1ccc(O)cc1	462.078	0.041	-8.6	31	4	7	5	9
CHEMBL1808972	CC(=O)OC[C@H]1[C@H](O)[C@@H](O)[C@@H](O)[C@@H]2NC(=O)c3c(O)c4OCOc4cc3[C@@H]12	381.106	-1.408	-7.5	27	4	2	5	9
ZINC000005665554	CCS[C@@H]([C@@H](O)[C@H](O)[C@H](O)[C@H](O)CO)n1cnc2c1ncnc2Cl	378.076	-0.833	-6.7	24	2	8	5	10
CHEMBL180434	OCCNc1nc(NCCO)nc(Nc2ccc(cc2)[N+](=O)[O-])n1	335.134	0.332	-7.3	24	2	9	5	10
ZINC000015953217	NC(=O)NC(=O)C[C@@H]1SC(N/N=C2/CSC(=O)N2)=NC1=O	330.02	-1.071	-8.1	21	2	3	4	8
CHEMBL215381	O[C@H]1[C@@H](O)[C@@H](O[C@@H]1COP(=O)(O)O)N2C=CC(=O)N(CC(=O)c3ccccc3)C2=O	442.078	-1.379	-7.7	30	3	7	4	10
CHEMBL141123	CC1=CN(C2CC(=C)C(COP(=O)(O)OP(=O)(O)OP(=O)(O)O)O2)C(=O)NC1=O	477.994	0.032	-8.5	29	2	8	5	10
CHEMBL294026	Nc1n[nH]c(SCC(=O)N[C@H]2[C@H]3SCC(=C(N3C2=O)C(=O)O)Cl)n1	389.997	-0.586	-7.1	24	3	5	4	8
ZINC000252479561	Nc1cc(N)nc(SCC(=O)NCc2ccc(S(N)(=O)=O)cc2)n1	368.073	-0.303	-7.8	24	2	6	4	8
CHEMBL1981426	NNC(=O)C(=O)N\N=C(\C(C#N)c1ccc(Cl)cc1)/C(=O)Nc2nc(cs2)[N+](=O)[O-]	450.026	0.413	-8.6	30	2	6	4	10
ZINC000005834671	COC(=O)/C(=N\NC(=S)NN)[C@@H](C(=O)OC)C(=O)C(=O)Nc1cccc(C(F)(F)F)c1	463.077	-0.131	-7.5	31	1	7	4	9
ZINC000004878902	Nc1nc(N)c(/N=N/c2ccccc2S(=O)(=O)O)c(=O)[nH]1	310.048	0.596	-7.4	21	2	3	4	8
ZINC000299872798	CC(C)[C@H](NC(=O)OCc1ccccc1)C(=O)OC[C@@H]1O[C@@H](O)[C@@H](O)[C@H](O)[C@H]1O	413.169	-0.719	-8.3	29	2	7	5	9
CHEMBL1474703	OC[C@@H]1O[C@@H](O)[C@H](\N=C/c2ccc3OCOc3c2)[C@@H](O)[C@@H]1O	311.101	-1.366	-7.9	22	3	3	4	8
ZINC000001688107	Nc1nc(N)nc(N(CCO)CCO)n1	214.118	-2.173	-5.5	15	1	5	4	8
CHEMBL3641259	CN1C=Nc2cc(nc(NCC(O)CO)c2C1=O)c3ccc(nc3)C(C)(C)O	385.175	0.383	-8.2	28	3	6	4	9
CHEMBL81054	COC(=O)c1c(Cl)ncnc1N[C@@H]2O[C@H](CO)[C@@H](O)[C@H]2O	319.057	-1.233	-6.4	21	2	4	4	9
CHEMBL3622511	CN(C)C1=NC(=C(C(=O)N1)c2nc3ccccc3s2)N[C@@H]4C[C@H](CO)[C@@H](O)[C@H]4O	417.147	0.627	-7.8	29	4	5	5	9
CHEMBL1989637	NC1CC(O)CC(=N1)Sc2nc(N)cc(O)n2	255.079	-0.306	-6.7	17	2	1	4	8
CHEMBL359163	C[C@H](O)[C@H]1O[C@@H](Oc2ccc(\C=C(/C)\C(=O)N3CCN(C)CC3)cc2O)[C@@H](O)[C@@H]1O	422.205	-0.224	-8	30	3	5	4	8
CHEMBL1207111	O=C(Nc1cc(NC(=O)c2nnn[nH]2)cc(c1)C#N)c3nnn[nH]3	325.078	-0.911	-9.7	24	3	4	4	9
CHEMBL2113489	Nc1ncnc2c1ncn2[C@@H]3O[C@@H]([C@@H](O)[C@H]3O)C(=O)NC4CCCCC4	362.17	-0.523	-8.1	26	4	3	4	9
CHEMBL2004215	COCc1c(CO)cnc(C)c1OC2OC(CO)C(O)C(O)C2O	345.142	-1.793	-6.1	24	2	6	5	9
CHEMBL42785	CC(=O)Nc1nc(NC(CO)C(O)CO)c(Cl)nc1[N+](=O)[O-]	335.063	-0.877	-6.7	22	1	7	5	9
ZINC000239377959	Cc1ccc([N+](=O)[O-])cc1N[C@@H]1O[C@H]([C@H](O)CO)[C@@H](O)[C@@H]1O	314.111	-0.885	-7.1	22	2	5	5	8
CHEMBL261453	CNc1nc(nc2c1ncn2[C@@H]3O[C@H](CO)[C@@H](O)[C@H]3O)C#C[C@@H](O)c4ccccc4	411.154	-0.435	-8.7	30	4	4	5	10
CHEMBL1938673	CCOc1ccncc1C#Cc2c(Cl)nc(N)nc2N[C@@H]3C[C@H](CO)[C@@H](O)[C@H]3O	419.136	0.42	-7.2	29	3	5	5	9
ZINC000100751486	CC1(C)OC(=O)C(=CN[C@@H](CCCNC(=N)N)C(=O)Nc2ccc([N+](=O)[O-])cc2)C(=O)O1	448.171	0.475	-8.7	32	2	9	5	9
CHEMBL1342211	CCC(C)Nc1nc(N)c(c(NCCO)n1)[N+](=O)[O-]	270.144	0.582	-6	19	1	7	4	8
ZINC000004692135	O[C@H]1[C@@H](CNc2ccccn2)O[C@@H](Nc2ccccn2)[C@@H](O)[C@H]1O	332.148	-0.192	-7.6	24	3	5	5	8
ZINC000036503767	N#C[C@]1(C(=O)O)[C@@H](O)[C@H](n2ccc(=O)[nH]c2=O)O[C@@H](CO)[C@H]1O	327.07	-3.257	-6.9	23	2	3	5	9
CHEMBL3903516	CO[C@H]1Cc2ccccc2[C@H]1Nc3cc(N[C@@H]4C[C@H](COS(=O)(=O)N)[C@@H](O)[C@H]4O)ncn3	465.168	-0.057	-7.8	32	4	8	5	10
ZINC000008651779	Nc1ccccc1S(=O)(=O)Nc1c(N)nc(SCC(=O)O)nc1O	371.036	0.324	-7.3	24	2	6	5	9
ZINC000008618451	CN(C)[C@@H]1C(O)=C(C(N)=O)C(=O)[C@@]2(O)C(=O)c3c(O)c4c(O)cccc4cc3C[C@H]12	412.127	0.147	-8.5	30	4	2	5	8
CHEMBL3318268	OC(C(O)C(=O)O)C(=O)O.Oc1ccc(\C=C\C(=O)C2(CCN3CCCC3)CCOC2=O)cc1	479.179	0.271	-5.8	34	3	9	5	9
CHEMBL2058208	CN1CCN(CC1)C(=O)c2cccc(c2)c3ccc(O[C@H]4O[C@H](CO)[C@@H](O)[C@H](O)[C@@H]4O)cc3	458.205	-0.08	-8.7	33	4	5	4	8
ZINC000059490015	CC1CCN(S(=O)(=O)c2cc([N+](=O)[O-])ccc2NNC=C2C(=O)NC(=O)NC2=O)CC1	452.111	0.182	-9.5	31	3	6	4	9
CHEMBL388019	CNS(=O)(=O)NC\C(=N/OC)\[C@@H]1C[C@@H](CN1)SC2=C(N3[C@H]([C@H]2C)[C@@H]([C@@H](C)O)C3=O)C(=O)O	491.151	-1.34	-7	32	3	10	5	9
CHEMBL560324	OC[C@H]1O[C@H]([C@H](O)[C@@H](O)[C@@H]1O)c2noc(n2)c3ccc4ccccc4c3	358.116	0.405	-8.7	26	4	3	4	8
ZINC000002539806	CCNC(=O)[C@@H]1O[C@H](n2cnc3c2ncnc3N)[C@@H](O)[C@H]1O	308.123	-1.836	-6.8	22	3	3	4	9
ZINC000017377246	NC(=S)N/N=C/Cn1ccc(=O)n(C/C=N\NC(N)=S)c1=O	342.068	-2.352	-6.6	22	1	6	4	8
ZINC000013570318	CCOC(=O)c1ccc(NC(=O)[C@@H]2CC(=O)Nc3nc(N)nc(N)c32)cc1	370.139	0.882	-8.1	27	3	4	4	8
CHEMBL1968333	CC(C)(C)N\N=C(\C1[S+]([O-])c2ccccc2NC1=O)/C(=O)Nc3nnc(S)[nH]3	421.099	0.904	-8.5	28	3	4	5	8
ZINC000004257460	CCOC(=O)NC(NC(=O)OCC)C(NC(=O)OCC)NC(=O)OCC	378.175	0.623	-6.3	26	0	9	4	8
CHEMBL95745	NC1=NC(=N)C2C(N=CN2COCCO)C(=N1)N.OS(=O)(=O)C(F)(F)F	403.089	-1.909	-4.6	26	2	4	5	10
ZINC000098086400	CCc1nnc(N/N=C/c2ccc(S(=O)(=O)O)cc2S(=O)(=O)O)n1N	390.042	-0.506	-7.6	25	2	6	4	10
ZINC000005540504	Cc1c(C#N)c(N)n([C@@H]2O[C@@H](CO)[C@@H](O)[C@@H](O)[C@H]2O)c(=S)c1C#N	352.084	-1.176	-6.8	24	2	2	5	10
CHEMBL2003955	Nn1c(S)nnc1CCCCCCCCc2nnc(S)n2N	342.141	1	-6.4	22	2	9	4	10
CHEMBL4097510	OC[C@H]1O[C@H](OCc2onc(c2)c3ccccc3)[C@H](O)[C@@H](O)[C@@H]1O	337.116	-0.342	-8.3	24	3	5	4	8
CHEMBL79666	NC(Cn1cnc2c(O)ncnc12)C(O)CO	239.102	-1.788	-6.6	17	2	4	4	8
CHEMBL3544822	Nc1nc(N)c2nc(c(N)nc2n1)c3ccc(OS(=O)(=O)O)cc3	349.059	0.015	-8.1	24	3	3	4	10
CHEMBL927	Nc1nc(cs1)\C(=N\O)\C(=O)N[C@H]2[C@H]3SCC(=C(N3C2=O)C(=O)O)C=C	395.036	-0.172	-7.2	26	3	5	4	9
ZINC000035270830	COC[C@@H]1O[C@H](O[C@H]2OC(=O)C([C@H](O)c3ccccc3)=C2c2ccccc2)[C@@H](NC(C)=O)[C@@H](O)[C@@H]1O	499.184	0.671	-8.3	36	4	8	4	9
CHEMBL1978478	Nc1ncnc2c(nsc12)C3OC(CO)C(O)C3O	284.058	-1.178	-7.2	19	3	2	4	9
ZINC000113208009	NS(=O)(=O)NCCNc1nonc1/C(=N/O)Nc1ccc(F)c(Br)c1	436.992	0.424	-7.2	25	2	7	5	8
ZINC000000501804	O=C1c2ccccc2[C@]2(O)Nc3nonc3N[C@]12O	260.055	-0.363	-8.1	19	4	0	4	8
CHEMBL3303857	NCc1cc(C(=O)N)n(n1)[C@@H]2OC[C@@H](O)[C@@H](O)[C@H]2O	272.112	-2.948	-7.1	19	2	3	5	8
ZINC000005496484	O=c1nc(NC[C@H]2CCCO2)ccn1[C@H]1O[C@@H](CO)[C@@H](O)[C@H]1O	327.143	-1.554	-7.3	23	3	5	4	9
CHEMBL3248765	O=C(Nc1nnn[nH]1)C2=CC(=O)c3cc(ccc3O2)C(=O)Nc4nnn[nH]4	368.073	-0.676	-8.7	27	4	4	4	10
CHEMBL284868	CC1OC(OC2CCCCC2OCCCCC(C(=O)O)C(=O)O)C(O)C(O)C1O	420.2	0.114	-7.8	29	2	10	5	8
CHEMBL1570116	COC(=O)[C@@H]1C[C@@]2(O)[C@H](O)[C@H](O)[C@H](O)C[C@H]2N1Cc3cc(OC)cc(OC)c3	397.174	-0.963	-7.4	28	3	5	4	9
CHEMBL1369600	COC(=O)[C@@H]1C[C@@]2(O)[C@@H](O)[C@@H](O)[C@@H](O)C[C@H]2N1Cc3ccc(C)s3	357.125	-0.61	-6.5	24	3	3	4	8
CHEMBL1277859	Cl.CS(=O)(=O)CC[C@H](N)C(=O)N[C@@H](CO)[C@H](O)c1ccc(cc1)[N+](=O)[O-]	411.087	-0.711	-6.9	26	1	9	4	8
ZINC000220479929	Nc1nnc(SCC(=O)N[C@@H]2CCNC[C@H]2O)s1	289.067	-0.949	-7.2	18	2	4	4	8
CHEMBL1712863	COc1ccc(OC)c(Cc2cnc3nc(N)nc(N)c3c2C)c1.OCCS(=O)(=O)O	451.153	0.972	-3.9	31	3	6	4	10
CHEMBL374789	N[C@@H]1C[C@H](N)CN(C1)c2nc(Nc3ccc(F)cc3)nc(n2)N4C[C@H](N)C[C@H](N)C4	416.256	-0.516	-8.7	30	4	4	5	10
CHEMBL112511	C[S+]([O-])C[S+]([O-])C[C@H](CO)NC(=O)\C=C\c1c(C)nc(O)nc1O	377.072	-1.229	-6.8	24	1	8	4	8
CHEMBL3245844	OC1O[C@@H](COS(=O)(=O)c2ccccc2)[C@@H](O)[C@@H](O)[C@@H]1O	320.057	-1.808	-7.6	21	2	4	4	8
CHEMBL4092097	O[C@H]1[C@H](O)[C@@H](COS(=O)(=O)O)O[C@@H](Oc2ccccc2C=O)[C@@H]1O	364.046	-1.495	-7.1	24	2	6	4	9
ZINC000252617723	CCOC(=O)NC(=O)/C=C(/C)NC[C@H](C)N/C(C)=C\C(=O)NC(=O)OCC	384.201	0.907	-6.7	27	0	9	4	8
CHEMBL304179	Nc1ncnc(N[C@@H]2O[C@H](CO)[C@@H](O)[C@H]2O)c1[N+](=O)[O-]	287.087	-2.182	-6.7	20	2	4	5	10
CHEMBL28922	NC(=N)NCCC[C@H](NC(=O)[C@@H]1CCN2CC[C@@](N)(Cc3ccccc3)CN12)C(=O)c4nccs4	498.253	0.709	-8.1	35	4	10	5	8
CHEMBL555132	OC[C@H]1O[C@]2(ON=C(S2)c3ccc(cc3)c4ccccc4)[C@H](O)[C@@H](O)[C@@H]1O	389.093	0.906	-8.1	27	4	3	4	8
ZINC000077285383	NC(=O)OC[C@@H](O[C@@H]1O[C@H](C(=O)O)[C@@H](O)[C@H](O)[C@H]1O)c1ccccc1Cl	391.067	-0.615	-7.1	26	2	6	5	8
ZINC000017175366	CSc1nc(N[C@H]2OC[C@@H](O)[C@@H](O)[C@@H]2O)c(I)c(=O)[nH]1	414.97	-1.053	-7.1	20	2	3	5	8
CHEMBL3229999	CC(=O)C1=C(O)\C(=C(/O)\Nc2cccc(OCC(=O)O)c2)\C(=O)OC1=O	363.059	0.816	-8	26	2	6	4	9
CHEMBL556107	OC[C@H]1O[C@@H](S\C(=N/O)\c2ccc3ccccc3c2)[C@H](O)[C@@H](O)[C@@H]1O	365.093	0.509	-8	25	3	3	5	8
CHEMBL2237890	OC1(C2N=C(NNC(=O)c3ccccc3)NC(=O)C2=C4CCCN14)N5CCOCC5	412.186	-0.883	-9.1	30	5	2	4	8
CHEMBL3236421	NC1=NC(=O)N(C=C1)[C@@H]2O[C@H](COP(=O)(O)NC(=O)c3ccccc3)[C@@H](O)C2(F)F	446.08	0.266	-8.2	30	3	6	4	9
ZINC000005423663	C=CCSc1ncnc2c1n[nH]c2[C@@H]1O[C@@H](CO)[C@@H](O)[C@@H]1O	324.089	-0.215	-6.9	22	3	5	4	8
ZINC000514288235	CCO[C@@H]1O[C@H](COC(=O)C[C@](C)(O)CC(=O)O)[C@@H](O)[C@H](O)[C@H]1O	352.137	-2.01	-7.1	24	1	8	5	9
CHEMBL3142963	Nc1ncnc2c1ncn2[C@@H]3O[C@H](CO)[C@@H](O)[C@H]3NC(=O)c4cccs4	376.095	-0.481	-8.1	26	4	4	4	10
CHEMBL1317573	Nc1nc(cs1)\C(=N\OCC(=O)O)\C(=O)N[C@H]2[C@@H]3SCC(=C(N3C2=O)C(=O)O)C=C	453.041	-0.545	-7.3	30	3	8	4	10
CHEMBL351129	OCCSC1=CN(O[C@H]2CC(O)[C@@H](CO)O2)C(=O)NC1=O	320.068	-2.482	-6.7	21	2	6	4	9
CHEMBL3403441	Nc1ncc(c(N[C@@H]2C[C@H](CO)[C@@H](O)[C@H]2O)n1)c3nc4cnccc4s3	374.116	0.245	-7.7	26	4	4	5	10
CHEMBL591738	COc1nnc(Cc2cc(ccc2Cl)[C@@H]3O[C@H](CO)[C@@H](O)[C@H](O)[C@H]3O)s1	402.065	0.306	-8.3	26	3	5	4	9
CHEMBL1684164	OC[C@@H]1[C@@H](O)[C@H](O)C[S+]1C[C@H](O)COS(=O)(=O)[O-]	304.029	-3.461	-6.2	18	1	6	4	8
CHEMBL1202109	COC(=O)[C@H](CCC\N=C(/N)\N[N+](=O)[O-])NC(=O)[C@@H](N)Cc1ccccc1.OC(=O)C(F)(F)F	494.174	-0.276	-4.2	34	1	10	5	8
ZINC000004621130	N=c1nc(N)n2c(=N)nc(N)n12	166.072	-2.61	-6.2	12	2	0	4	8
CHEMBL2018047	Nc1nc(Cl)c(c(N[C@@H]2C[C@H](CO)[C@@H](O)[C@H]2O)n1)c3occc3	340.094	0.487	-7.7	23	3	4	5	8
CHEMBL1178261	Cn1cnc(c1)S(=O)(=O)N[C@@H](CNC(=O)CC2CC(=NO2)c3ccc(cc3)C(=N)N)C(=O)O	477.143	-0.865	-7.9	33	3	10	5	9
CHEMBL174145	OC[C@H]1O[C@@H](Oc2ccc(cc2)C(=O)c3ccc(cc3)[N+](=O)[O-])[C@@H](O)[C@@H](O)[C@@H]1O	405.106	0.004	-8.5	29	3	6	4	9
CHEMBL536301	Br.C1CN=C(N\N=C\c2ccc(\C=N\NC3=NCCN3)cc2)N1	378.092	0.03	-7	23	3	4	4	8
CHEMBL3608679	Nc1ncnn2c(cc(F)c12)[C@@H]3O[C@@](CO)(C#N)[C@@H](O)[C@H]3O	309.087	-1.502	-7.7	22	3	2	4	9
CHEMBL3907637	NS(=O)(=O)NC[C@H]1O[C@H]([C@H](O)[C@@H]1O)n2cnc3c(NCc4ccccc4)ncnc23	435.132	-1.149	-8.6	30	4	7	5	10
ZINC001772592109	CC(C)C[C@H]1NC(=O)[C@H](CC(C)C)N(O[C@@H]2O[C@H](CO)[C@@H](O)[C@H](O)[C@H]2O)C1=O	404.216	-1.494	-6.9	28	2	7	5	8
ZINC000072422602	COCCNc1nc2c(c(N[C@H](CO)c3cccnc3)n1)CCNCC2	358.212	0.764	-7.6	26	3	8	4	8
ZINC000019318986	O=[N+]([O-])C(=C1N[C@H](O)[C@H](O)N1)[N+](=O)[O-]	206.029	-2.504	-6.4	14	1	2	4	8
ZINC000008651764	C[C@@H]1O[C@@H](Sc2ncnc3nc[nH]c32)[C@@H](O)[C@@H](O)[C@@H]1O	298.074	-0.728	-7.2	20	3	2	4	8
CHEMBL2113449	CCNC(=O)[C@H]1O[C@H]([C@H](O)[C@@H]1O)n2cnc3c(N)nc(nc23)C#C	332.123	-1.855	-7.8	24	3	3	4	9
CHEMBL438830	N[C@@H]1C[C@H](N)CN(C1)c2nc(Cl)nc(n2)N3C[C@H](N)C[C@H](N)C3	341.184	-1.746	-7.2	23	3	2	4	9
CHEMBL195483	COc1ccc(\C=N\O[C@@H]2OC(CO)C(O)[C@H](O)C2O)c(O)c1	329.111	-1.449	-7.4	23	2	5	5	9
CHEMBL331527	NCC(=O)NCC(=O)Nc1ccc(cc1)S(=O)(=O)Nc2nnc(s2)S(=O)(=O)N	449.025	-2	-8.1	28	2	8	5	10
CHEMBL1161259	Nc1ncnc2c1ncn2C3O[C@H](CO)[C@@H]([C@H]3O)S(=O)(=O)O	331.059	-2.084	-7.4	22	3	3	4	10
CHEMBL223215	NS(=O)(=O)c1ccc(cc1)n2cc(COC3OC[C@@H](O)[C@@H](O)[C@@H]3O)nn2	386.09	-2.13	-8.2	26	3	5	4	10
CHEMBL607601	NC(=S)c1ncn(n1)C2O[C@H](COS(=O)(=O)N)[C@@H](O)[C@H]2O	339.031	-3.248	-7.2	21	2	5	4	10
ZINC000012601605	Nc1nc(N)nc(SCC(=O)NC(=O)NCCc2cccs2)n1	353.073	0.258	-7.7	23	2	6	4	9
ZINC000033599938	S=C(N/N=C/c1cccnc1)NN1CCN(NC(=S)N/N=C\c2cccnc2)CC1	442.147	0.22	-7.6	30	3	6	4	8
CHEMBL358067	Nc1ncnc2c1nnn2C(CO)CC(CO)CO	268.128	-1.672	-6.6	19	2	6	4	9
ZINC000104050936	CS(=O)(=O)O[C@H]([C@H](O)CO)[C@H](OS(C)(=O)=O)[C@@H](O)CO	338.034	-3.618	-5.3	20	0	9	4	10
CHEMBL538119	O[C@H]1[C@@H](O)[C@@H](O[C@@H]1COP(=O)(O)O)n2cnc(c2)[N+](=O)[O-]	325.031	-1.48	-7.2	21	2	5	4	9
CHEMBL320025	CN(CC(=O)O)NC(=O)C[C@H](N)c1csc(CNC(=O)OC(C)(C)C)n1	387.158	0.605	-7.3	26	1	8	4	8
CHEMBL1823458	N[C@@H](CC(=O)O)C(=O)O[C@H]1C[C@@H](O[C@@H]1CO)N2C=C(F)C(=O)NC2=O	361.092	-2.331	-7.6	25	2	6	4	9
ZINC000026249456	CO/N=C(\C(=O)N[C@@H]1C(=O)N2C(C(=O)O)=C(CO)CS[C@H]12)c1csc(N)n1	413.046	-1.193	-7.2	27	3	6	4	10
ZINC000005349429	C[C@H](NC(=O)CSc1ncnc2[nH]cnc21)C(=O)N[C@@H](CCC(=O)O)C(N)=O	409.117	-1.215	-7.8	28	2	10	5	8
ZINC000059490019	C[C@@H]1CN(S(=O)(=O)c2cc([N+](=O)[O-])ccc2NNC=C2C(=O)NC(=O)NC2=O)C[C@@H](C)O1	468.106	-0.441	-9.1	32	3	6	4	10
CHEMBL2375754	Nc1nccc(NCCNc2ccnc(N)n2)n1	246.134	-0.045	-6.9	18	2	5	4	8
CHEMBL3348570	OC(=O)CC[C@H](NC(=O)N[C@@H](CCC(=O)O)C(=O)O)C1N=NN=N1	344.108	-0.004	-7	24	1	10	5	8
CHEMBL1162979	[Na+].OC[C@H]1O[C@@H](Cc2cc(O)cc(\C=C/c3ccc(O)cc3)c2)[C@H](O)[C@@H](OS(=O)(=O)[O-])[C@@H]1O	490.091	-2.858	-8.6	33	3	7	5	10
ZINC000016681660	CCNC(=O)C[C@H]1S/C(=N\N=C2\NC(=O)[C@@H](CC(=O)NCC)S2)NC1=O	400.099	-0.871	-7.4	26	2	7	4	8
ZINC000005430520	O=C1/C(=C/c2ccc([N+](=O)[O-])cc2)SC(=S)N1[C@@H]1O[C@@H](CO)[C@@H](O)[C@@H](O)[C@H]1O	428.035	-0.404	-7	28	3	4	4	10
ZINC000022012807	C#CC[C@@](Cc1cnc2nc(N)nc(N)c2n1)(C(=O)O)c1ccc(C(=O)O)cc1	392.123	0.871	-8.6	29	3	6	4	8
ZINC000001637231	Cc1noc(NS(=O)(=O)c2ccc(NC(=S)NC=C3C(=O)NC(=O)NC3=O)cc2)c1C	464.057	0.629	-9	31	3	5	5	8
CHEMBL63418	Nc1nc(S)c2ncn(CCOCP(=O)(O)O)c2n1	305.035	-0.151	-6.7	19	2	5	4	8
ZINC000110424093	O=S(=O)(O)O/N=C(\Cc1ccccc1)S[C@@H]1O[C@H](CO)[C@H](O)[C@@H](O)[C@H]1O	409.05	-1.105	-7.6	26	2	6	5	10
CHEMBL1652468	Nc1nc(NC2CC2)c3ncn(CCOCP(=O)(O)OP(=O)(O)O)c3n1	408.071	0.252	-7.7	26	3	9	5	10
ZINC000004081954	CCC[C@@H]1C[C@@H](C(=O)N[C@@H]([C@@H](C)O)[C@H]2O[C@H](SC)[C@H](O)[C@@H](O)[C@H]2O)N(C)C1	406.214	-0.857	-7.2	27	2	7	5	8
ZINC000077291204	C[S@@](=O)CCCC/C(=N/O)S[C@@H]1O[C@@H](CO)[C@@H](O)[C@H](O)[C@@H]1O	357.092	-1.144	-6.4	22	1	7	5	9
CHEMBL107964	CN(CC(=O)O)NC(=O)C[C@H](N)Cc1csc(CCNC(=O)OC(C)(C)C)n1	415.189	0.518	-7.1	28	1	10	4	8
ZINC000257257061	C[C@@]1(O)C[C@H](O)CNC[C@H]1n1cnc2c1ncnc2N	278.149	-0.945	-6.4	20	3	1	4	8
CHEMBL3339249	CC(C)\C=N\NC(=O)c1ccc(O[C@@H]2O[C@H](CO)[C@@H](O)[C@H](O)[C@H]2O)cc1	368.158	-0.763	-7.5	26	2	6	5	8
ZINC000017213245	Nc1n[nH]c(NC(=O)C2=N[S@](=O)(O)=c3cc(S(N)(=O)=O)c(Cl)cc3=N2)n1	419.983	-1.719	-8.4	26	3	3	5	8
ZINC000006828397	Nn1cnnc1N/N=C/c1cc(Br)c(O)cc1O	311.997	0.612	-7.2	18	2	3	4	8
CHEMBL93620	ONC(=O)[C@H]1[C@@H](O)[C@H](O)[C@@H](O)CN1S(=O)(=O)c2ccc(OCc3ccccc3)cc2	438.11	-0.773	-8.7	30	3	6	5	8
CHEMBL46592	COC(=O)[C@H](CO)NCCN[C@@H](CO)C(=O)OC	264.132	-2.767	-5.4	18	0	9	4	8
ZINC000071769469	C=C1c2cccc(O)c2C(=O)[C@]2(F)C(=O)[C@]3(O)C(=O)C(C(N)=O)=C(O)[C@@H](N(C)C)[C@@H]3[C@@H](O)[C@H]12	460.128	-0.973		33	4	2	5	9
CHEMBL461559	O.NC(=O)c1c(CN2CCC(Cc3c[nH]cn3)CC2)no[n+]1[O-].OC(=O)C(=O)O	414.15	-2.084	-1.4	29	3	5	4	8
CHEMBL284587	CN[p@]1(N)n[p@@](N)(NC)np(n1)(N2CC2)N3CC3	311.105	0.826	-5.2	18	3	4	4	9
CHEMBL1205313	CC(C)(O\N=C(\C(=O)N[C@H]1CN(C1=O)S(=O)(=O)O)/c2csc(N)n2)C(=O)O	421.036	-1.561	-8	27	2	7	4	10
ZINC000252540168	Cc1nc(O)cc(CCNc2cc([C@H]3C[C@@H](N)C3)nc(N)n2)n1	315.181	0.722	-8	23	3	5	4	8
CHEMBL1938398	CS(=O)(=O)c1ccccc1C#Cc2c(Cl)nc(N)nc2N[C@@H]3C[C@H](CO)[C@@H](O)[C@H]3O	452.092	0.03	-7.4	30	3	4	5	9
CHEMBL3753767	Nc1ncnc2c1ncn2C[C@H](OCP(=O)(O)O)C(=O)NC3CC3	356.1	-0.793	-7.8	24	3	7	4	8
ZINC000004127867	CN(NO[C@H]1O[C@@H](CO)[C@@H](O)[C@@H](O)[C@H]1O)c1ccccc1	300.132	-1.641	-7	21	2	5	5	8
ZINC000101172713	C=C1CCO[C@@]2([C@@H](O)[C@@](C)(O)COC(=O)c3ccccc3)NC(=O)[C@@]1(O)NC2=O	406.138	-1.437	-8.1	29	4	5	5	8
ZINC000019331388	CCC12CN3CC(CC)(CN(C1)C3[C@@H](O)[C@@H](O)[C@@H](O)[C@@H](O)CO)C2=O	358.21	-2.245	-6.6	25	4	7	5	8
CHEMBL609960	COc1cc(c(c(\C=N\NC(=N)NO)c1OC)[N+](=O)[O-])[N+](=O)[O-]	328.077	0.357	-6.7	23	1	6	4	9
ZINC000044170260	O=[N+]([O-])c1ccc(CS[C@@H]2O[C@H](CO)[C@H](O)[C@H](O)[C@H]2O)cc1	331.073	-0.372	-7.5	22	2	5	4	8
ZINC000097101786	COc1cc(NS(=O)(=O)c2cnc3nc(O)[nH]c(=O)c3c2)c(C(=O)O)cc1OC	422.053	0.54	-8.1	29	3	6	4	9
CHEMBL1299989	OC(=O)CNC(=O)CC1SC(=NC1=O)NN=C2CSC(=O)N2	345.02	-1.065	-7.8	22	2	5	4	8
ZINC000008665445	CC(/C=N/NC1=NCCCN1)=N/NC1=NCCCN1	264.181	-0.774	-7.3	19	2	3	4	8
CHEMBL3671792	Cn1nccc1c2cc3c(N[C@@H]4C[C@@H](O)[C@@H](O)C4(C)C)c(cnn3c2)C(=O)N	384.191	0.766	-7.9	28	4	4	4	8
CHEMBL3814496	[Cl-].OC[C@H](OCc1ccccc1[N+](=O)[O-])[C@H](O)C[S+]2C[C@@H](O)[C@H](O)[C@H]2CO	425.091	-4.448	-1.1	27	2	9	5	8
CHEMBL1488561	NNC(=O)CS(=O)(=O)CS(=O)(=O)CC(=O)NN	288.02	-4.247	-6.5	17	0	6	4	8
ZINC000102819320	CN(C[C@@H](O)[C@@H](O)[C@H](O)[C@@H](O)CO)C(=O)COc1ccc2c(c1)oc(=O)c1ccccc21	447.153	-0.781	-8	32	3	9	5	9
CHEMBL1172235	CNc1ccnc2c1ncn2[C@@H]3O[C@H](CO)[C@](O)(CO)[C@H]3O	310.128	-1.553	-7.4	22	3	4	5	9
CHEMBL41082	COC(=O)[C@H](COC(=O)c1ccc(Cl)cc1)NC(=O)[C@@H](NC(=O)[C@@H](N)CS)C(C)C	459.123	0.553	-7.1	30	1	10	4	8
ZINC000585283760	Cn1ccnc1CNC(=O)[C@H]1O[C@@H](CN)[C@H](O)[C@@H](O)[C@H]1O	300.143	-3.155	-7.2	21	2	4	5	8
ZINC000038200248	Cc1ccc(NNc2nc3nonc3nc2NNC2=c3ccccc3=NC2=O)cc1	401.135	0.645	-9.3	30	5	6	4	10
ZINC000115997836	C[C@@H]1C/C=C2\SC[C@@H](NC(=O)c3coc(n3)C[C@@H](O)C[C@H](O)/C=C/C=C/CNC2=O)C(=O)O1	477.157	0.622	-8	33	3	0	4	9
CHEMBL3125424	COc1cc(O)cc2C(=O)C3=C([C@H](O)[C@@H](O)[C@@](C)(O)[C@H]3O)C(=O)c12	336.085	-1.076	-6.9	24	3	1	5	8
CHEMBL2418614	OC[C@H]1O[C@@H](NC(=O)c2oc(nn2)c3ccc4ccccc4c3)[C@H](O)[C@@H](O)[C@@H]1O	401.122	-0.581	-8.5	29	4	4	5	9
ZINC000169686736	CN(C)[C@@H]1C(=O)[C@@H](C(N)=O)C(=O)[C@@]2(O)C(=O)[C@H]3C(=O)c4c(O)cccc4[C@@](C)(O)[C@H]3C[C@@H]12	444.153	-1.468	-7.8	32	4	2	4	9
ZINC000225503808	Cc1noc(C)c1NC(=O)N[C@@H]1C[C@H](Cn2cc(C3CC3)nn2)[C@@H](O)[C@H]1O	376.186	0.692	-8.1	27	4	5	4	8
CHEMBL281484	COC(=O)c1c(O)cccc1CC2CC3[C@H](N(C)C)C(=O)C(=C(O)[C@]3(O)C(=O)C2)C(=O)N	446.169	-0.142	-6.2	32	3	5	4	9
CHEMBL1766273	COCCNc1nc(N)nc2c1ncn2C[C@H](CF)OCP(=O)(O)O	378.122	-0.043	-7.1	25	2	10	4	9
CHEMBL1091970	OC[C@H]1O[C@H]([C@H](O)[C@@H](O)[C@H]1O)n2cc(nn2)c3ccccc3Br	385.027	-0.32	-7.6	23	3	3	4	8
CHEMBL603560	N[S+]([O-])c1nc(N)cc2c1ncn2C3O[C@H](CO)[C@@H](O)[C@H]3O	329.079	-2.394	-7.5	22	3	3	5	10
ZINC000016449436	O=C1NC(=O)C(C(c2ccccc2[N+](=O)[O-])C2C(=O)NC(=O)NC2=O)C(=O)N1	389.061	-1.357	-6.4	28	3	4	4	8
CHEMBL514144	CO[C@]1(NC(=O)[C@]2(OC(=C(C)C2=O)[C@@H](O)[C@@H](O)\C=C\C(=O)C)[C@H]1O)C(=O)c3ccccc3	445.137	-0.818	-7.7	32	3	7	4	9
ZINC000085431603	CS(=O)(=O)OC[C@@H](O)[C@@H](O)[C@@H](O)[C@@H](O)COS(C)(=O)=O	338.034	-3.618	-6	20	0	9	4	10
ZINC000244778749	CNc1cc([C@H]2C[C@@H](NC(=O)c3c[nH]nc3-n3cnnn3)C2)nc(N)n1	355.162	-0.525	-8.4	26	4	5	4	10
CHEMBL498038	[Na+].Nc1cc(Nc2cc(c(N)c3C(=O)c4ccccc4C(=O)c23)S(=O)(=O)[O-])cc(c1)C(=O)O	475.045	-1.024	-9.6	33	4	4	4	9
CHEMBL438530	OC[C@@H](O)[C@@H](O)[C@H](OC(=O)c1nn(Cc2cc(Cl)cc(Cl)c2)c3ccccc13)[C@H](O)CO	484.08	0.984	-7.9	32	3	9	5	9
CHEMBL338629	Nc1nc(N)c2nc(CCc3ccc(s3)C(=O)NC(CCC(=O)O)C(=O)O)cnc2n1	445.117	0.479	-8.4	31	3	9	5	10
CHEMBL359949	Nc1nn2c(O)cc(CNNCCO)nc2c1[N+](=O)[O-]	283.103	-1.488	-7.2	20	2	6	5	10
CHEMBL3403444	Nc1ncc(c(N[C@@H]2C[C@H](CO)[C@@H](O)[C@H]2O)n1)c3nccs3	323.105	-0.303	-7	22	3	4	5	9
ZINC000020120441	Nc1cc(O)c(O)cc1-c1nnn(CC(=O)O)n1	251.065	-0.582	-7.4	18	2	3	4	8
CHEMBL49401	O[C@@H]1[C@@H](O)[C@H]2OCO[C@H]2[C@H](O)[C@@H]1NC(=O)C3=Cc4cc(O)c(OCC=C)cc4CCC3	433.174	-0.001	-7.9	31	4	5	5	8
CHEMBL1742956	COC(=O)[C@@H]1O[C@@H](SCCN)[C@@H](O)[C@H](O)[C@H]1O	267.078	-2.341	-5.6	17	1	4	4	8
CHEMBL1207655	NC(=O)c1cc(NC(=O)c2nnn[nH]2)cc(NC(=O)c3nnn[nH]3)c1	343.089	-1.684	-9.3	25	3	5	5	9
ZINC000002537724	NNc1nc2ccccc2c(=O)n1Nc1nc2ccccc2c(=O)n1N	350.124	-0.019	-8.2	26	4	3	4	10
CHEMBL48502	CO[C@]12C3NC3CN1C4=C(C2COC(=O)N)C(=O)C(=C(C)C4=O)OCC(O)CO	409.149	-2.24	-6.9	29	4	7	4	10
ZINC000004824166	CS(=O)(=O)NC[C@@H]1O[C@@H](n2cnc3c2ncnc3N)[C@@H](O)[C@@H]1O	344.09	-2.423	-7.5	23	3	4	4	10
ZINC000044137688	O=C(O)CN1CCN(CC(=O)O)CCN(CC(=O)NCCS)CCN(CC(=O)O)CC1	463.21	-2.492	-6.6	31	1	10	5	9
CHEMBL1962441	NCCNc1nc(NCCN)n2nc(nc2n1)c3occc3	303.156	-0.479	-7.1	22	3	7	4	10
CHEMBL2311916	C[C@@H](N)[C@H](N)C(=O)NS(=O)(=O)\C=C\c1cccc(c1)c2cc(N)ncn2	376.132	-0.183	-8.1	26	2	6	4	8
CHEMBL3764966	CC1(C)[C@H](NC(=O)\C(=N/OCc2ccc(cc2)C(=O)O)\c3csc(N)n3)C(=O)N1S(=O)(=O)O	497.068	0.253	-8.9	33	3	8	4	10
CHEMBL3425995	COC(=O)[C@]1(F)O[C@@H]([C@H](O)[C@H](O)CO)[C@H](NC(=O)C)[C@@H](N)[C@H]1F	342.124	-2.892	-6.3	23	1	5	5	8
CHEMBL4099388	O[C@@H]1[C@@H](COS(=O)(=O)O)O[C@H]([C@H](O)[C@H]1O)n2cc(nn2)c3ccccc3	387.074	-1.255	-8.2	26	3	5	4	10
ZINC000257346246	C[C@H](O)[C@H](O)[C@@H](O)[C@@H](O)/C=N/Nc1ccccc1[N+](=O)[O-]	299.112	-0.544	-7.2	21	1	7	5	8
CHEMBL3298882	C[C@@]1(O)[C@H](O)[C@](C)([NH+]=C2N1C=Nc3c2ncn3CCCO)C(=O)[O-]	337.139	-4.34	-7	24	3	4	4	9
ZINC000022594053	O=S(=O)(O)C[C@H](O)CN1CCN(C[C@H](O)CS(=O)(=O)O)CC1	362.082	-2.899	-6.4	22	1	8	4	8
CHEMBL3248280	CC(=O)C1=C(O)\C(=C(/C)\Nc2cc(NS(=O)(=O)C)cc(NS(=O)(=O)C)c2)\C(=O)OC1=O	473.056	0.6	-7.4	31	2	7	4	10
CHEMBL423484	CS(=O)(=O)OCC1OC(CO)C(O)C(O)C1O	272.057	-3.195	-6	17	1	4	4	8
ZINC000408532353	CN1C(=O)NC(=O)/C(=C\Nc2cc3nc(O)[nH]c3cc2[N+](=O)[O-])C1=O	346.066	0.181	-8.6	25	3	3	4	8
ZINC000104293706	Cc1ccc([N+](=O)[O-])cc1NC(=O)/C(=N\NC(=S)NN)[C@H]1SC(=S)NC1=O	427.019	0.052	-7.9	27	2	5	5	9
ZINC000104309853	C(/C=N\NC1=NCCN1)=N/NC1=NCCN1	222.134	-1.944	-6.2	16	2	3	4	8
CHEMBL1192938	CC1(C)N=C(N)N=C(N)N1c2ccc(cc2)N3C(=NC(=NC3(C)C)N)N	356.219	0.058	-7.9	26	3	2	4	10
CHEMBL2112867	CNc1nc(C)nc2c1ncn2[C@H]3C[C@H](OP(=O)(O)O)[C@]4(COP(=O)(O)O)C[C@H]34	449.087	0.715	-8.2	29	4	7	5	9
ZINC000016428629	Nc1nonc1/C(=N/O)NCCNc1ccc([N+](=O)[O-])cc1	307.103	0.397	-7.6	22	2	6	4	9
CHEMBL22155	Nc1nc(O)c2ncn(CS(=O)(=O)C(CO)CO)c2n1	303.064	-2.16	-7.1	20	2	5	4	10
ZINC000104239827	C[C@@]1(CO)COC(=O)[C@@](C)([C@]2(C)N[C@@](C)(CO)COC2=O)N1	316.163	-1.701	-5.5	22	2	3	4	8
CHEMBL41468	COC(=O)[C@H](Cc1cccc(OC(=O)C)c1)NC(=O)[C@@H](NC(=O)[C@@H](N)CS)C(C)C	439.178	0.21	-7.3	30	1	10	4	8
CHEMBL376029	CN(C)c1nc(nc(n1)N2C[C@H](N)C[C@H](N)C2)N3C[C@H](N)C[C@H](N)C3	350.265	-2.333	-7.1	25	3	3	4	10
ZINC000864096986	C[C@@H](NC(=O)C(F)(F)C(=O)N[C@H](C)c1nccc(N)n1)c1nccc(N)n1	380.152	0.121	-8	27	2	6	4	8
ZINC000002427108	Cn1c2nc(NN)n(C[C@@H](O)c3ccccc3)c2c(=O)[nH]c1=O	316.128	-0.558	-8	23	3	4	4	8
ZINC000016970127	NC(=O)NC(=O)/C=C/C(=O)OCCOC(=O)/C=C/C(=O)NC(N)=O	342.081	-2.425	-7.6	24	0	7	4	8
CHEMBL281494	CN(Cc1cnc2nc(N)nc(N)c2n1)c3ccc(cc3)C(=O)NCS(=O)(=O)O	418.117	-0.204	-8.8	29	3	6	4	10
CHEMBL1796688	C[C@H]1NC(=O)C[C@@H]2OC(=O)C[C@H](O)[C@H](NC(=O)[C@@H](CSSCC\C=C\2)NC1=O)C(=C)C	471.15	0.445	-5.6	31	2	1	4	8
CHEMBL1491763	OC[C@H](O)[C@H](O)[C@@H](O)[C@@H](O)[C@@H]1SC(=NN1c2ccccc2)c3ccccc3	390.125	0.364	-7.2	27	3	7	5	8
CHEMBL216916	Cc1cc(C)cc(Nc2nc(nc(n2)N3C[C@H](N)C[C@H](N)C3)N4C[C@H](N)C[C@H](N)C4)c1	426.297	-0.039	-8.5	31	4	4	5	10
ZINC000001703325	Cc1cn([C@H]2O[C@@H]([C@H](O)C(N)=O)[C@@H](O)[C@@H]2O)c(=O)[nH]c1=O	301.091	-3.69	-7.7	21	2	3	5	8
CHEMBL1650565	CN1C(=CC(=N)c2ccc(Nc3cc(C)[n+](C)c(N)n3)cc12)C.OS(=O)(=O)[O-]	406.142	0.825	-3.8	28	3	2	4	8
CHEMBL368123	OC1COC2(O)C1OC(=O)C2(O)Cc3cc(O)c(O)c(Br)c3Br	453.89	-0.098	-7.2	23	3	2	5	8
CHEMBL48346	CO\N=C(\C(=O)NC1CN(NCC(=O)O)C1=O)/c2csc(N)n2	342.075	-2.008	-7.2	23	2	7	4	9
ZINC000005511442	Nn1cnnc1N/N=C/c1ccc(O)c(O)c1	234.087	-0.151	-7.3	17	2	3	4	8
ZINC000226939768	O=[N+]([O-])c1cc(N[C@@H]2OC[C@H](O)[C@@H](O)[C@@H]2O)ccc1S(=O)(=O)O	350.042	-1.308	-7.9	23	2	4	5	9
ZINC000025667512	CS(=O)(=O)N/N=C1\S[C@H](c2ccc(N)cc2)NN1CCCS(=O)(=O)O	409.055	-0.081	-7.5	25	2	7	4	8
ZINC000059490005	CCN(CC)S(=O)(=O)c1cc([N+](=O)[O-])ccc1NNC=C1C(=O)NC(=O)NC1=O	426.096	-0.208	-8.5	29	2	8	4	9
ZINC000019322200	CCCC12CN3CC(C)(CN(C1)C3[C@H](O)[C@H](O)[C@H](O)[C@H](O)CO)C2=O	358.21	-2.245	-6.7	25	4	7	5	8
ZINC000016382889	O=[N+]([O-])NC1=N[C@H]2N=C3NONC3=N[C@H]2N1	226.056	-2.771	-7.7	16	3	1	4	9
CHEMBL29568	CN(C)[C@H]1C2CC3C(C(O)[C@]2(O)C(=C(C(=O)C)C1=O)O)C(=O)c4c(O)cccc4[C@@]3(C)O	445.174	0.054	-6.4	32	4	2	5	9
CHEMBL3642930	CC(Cc1occ(c1)C(=O)Oc2ccc(cc2)C(=N)N)C(=O)N[C@@H](CS(=O)(=O)O)C(=O)O	467.1	0.419	-8.2	32	2	10	5	8
CHEMBL1812600	N[C@@H](CN1C(=O)N(Cc2ccsc2P(=O)(O)O)C(=O)c3cscc13)C(=O)O	431.001	-0.451	-7.1	27	3	6	4	9
ZINC000005956233	CC(=O)c1c(C)n([C@H]2O[C@@H](CO)[C@@H](O)[C@@H](O)[C@H]2O)c(=S)c(C#N)c1-c1ccco1	420.099	0.833	-5.9	29	3	4	4	10
ZINC000021299253	CC(=O)[C@@H](O)[C@H]1O[C@@H](n2ccc(=O)[nH]c2=O)[C@@](O)(C(C)=O)[C@@]1(O)C(C)=O	370.101	-2.976	-6.7	26	2	5	4	10
ZINC000001748574	O=c1[nH]nc(SCc2ccc(CSc3n[nH]c(=O)[nH]c3=O)cc2)c(=O)[nH]1	392.036	-0.186	-8.5	26	3	6	4	8
ZINC000004577137	COC(=O)[C@@H]1C/C(=N/NC(N)=S)[C@H](C(=O)OC)C/C1=N\NC(N)=S	374.083	-1.263	-6.3	24	1	4	4	8
CHEMBL1909780	Cl.COC(=O)CNc1nc(N)c(nc1Cl)C(=O)NC(=N)N	337.046	-0.658	-7.1	21	1	4	5	8
ZINC000031302774	NNS(=O)(=O)c1cccc(S(=O)(=O)c2cccc(S(=O)(=O)NN)c2)c1	406.008	-1.177	-8.7	25	2	6	4	8
CHEMBL1997749	OCC1OC(C(O)C(O)C1O)N2C3=C(CCCCCC3)C=C(C#N)C2=S	380.141	0.721	-7.3	26	3	2	4	8
CHEMBL1085771	CSc1ccc(Cc2cc(ccc2Cl)[C@@H]3O[C@H](CO)[C@@H](O)[C@H](O)[C@H]3O)nn1	412.086	0.958	-7.8	27	3	5	4	8
CHEMBL108166	CNc1nc(Cl)nc2c1ncn2CCC(COP(=O)(O)O)COP(=O)(O)O	445.032	0.746	-7.5	27	2	10	5	9
CHEMBL3931188	O=C(N1CCNC(=O)C1)c2ccc(s2)c3cc(NC4CC4)n5ncc(\C=C\6/NC(=O)NC6=O)c5n3	492.133	0.784	-8.8	35	6	5	4	9
CHEMBL3229960	CC(=O)C1=C(O)\C(=C(/O)\Nc2ccc(N)c(O)c2)\C(=O)OC1=O	320.064	0.64	-7.9	23	2	3	5	9
CHEMBL1966045	NC(=S)N\N=C(/C1C(=O)NC(=S)NC1=O)\C(=O)Nc2nc3ccc(cc3s2)[N+](=O)[O-]	465.994	-0.521	-7.8	30	3	5	5	10
ZINC000408632186	COc1cc(OC)cc(-c2nc(S/C(=C/C3C(=O)NC(=O)NC3=O)C(=O)O)n[nH]2)c1	433.069	0.532	-7.9	30	3	7	4	9
CHEMBL1098829	C[C@H](CNC(=O)C[C@H]1O[C@@H](CNCCNC(=N)N)[C@H]2OC(C)(C)O[C@@H]12)OC(=O)C	415.243	-1.196	-7.6	29	2	10	5	8
ZINC000077285147	COC(=O)CNC(=O)[C@H](CS)NC(=O)CC[C@H](NC(=O)OC(C)(C)C)C(=O)OC	435.168	-0.463	-6.8	29	0	10	4	9
CHEMBL60095	COC12[C@@H](COC(=O)N)C3=C(N1C[C@H]4N[C@@H]24)C(=C(C)\C(=N/CCN)\C3=O)O	377.17	-1.221	-6.4	27	4	5	4	9
ZINC000019170591	CN(C)N[C@H]1O[C@@H]([C@@H](O)S(=O)(=O)O)[C@@H](OCc2ccccc2)[C@@H](OCc2ccccc2)[C@@H]1O	482.172	0.515	-6.4	33	3	10	4	9
CHEMBL89926	CC(O)CNc1nc(NCC(=O)N)nc2c1ncn2C	279.144	-0.947	-7	20	2	6	4	8
ZINC000005760806	COc1nc(N[C@@H]2OC[C@@H](O)[C@@H](O)[C@@H]2O)c(C=O)c(=O)n1C	315.107	-2.548	-7.5	22	2	4	4	10
CHEMBL2113528	CCCC\C=C\c1nc(N)c2ncn([C@@H]3O[C@@H]([C@@H](O)[C@H]3O)C(=O)NCC)c2n1	390.202	0.367	-7.6	28	3	7	4	9
CHEMBL3934281	Cc1cc(N\C(=N/O)\c2nonc2NCCNS(=O)(=O)C)ccc1F	372.102	0.726	-7.7	25	2	7	4	8
ZINC000244882463	Nc1nnnn1CC(=O)N[C@H]1C[C@@H](c2cc(NCCO)ncn2)C1	333.166	-1.488	-8.3	24	3	7	4	10
CHEMBL302907	NC(=N)Nc1nc(CSCCNc2n[s+]([O-])nc2N)cs1	346.045	0.894	-7.6	21	2	7	5	9
ZINC000005542051	O=C(O)c1cc(OS(=O)(=O)O)c(OS(=O)(=O)O)c(OS(=O)(=O)O)c1	409.892	-1.07	-6.6	24	1	7	4	10
CHEMBL3120496	OC[C@H]1O[C@@H](Oc2ccc3c4ccnc5C=CC(=O)n(c3c2)c45)[C@H](O)[C@@H](O)[C@@H]1O	398.111	-0.383	-8.8	29	5	3	4	9
ZINC000062725218	CC(=O)N[C@H]1[C@@H](Oc2ccc3oc(=O)sc3c2)O[C@@H](CO)[C@@H](O)[C@H]1O	371.067	-0.823	-8.3	25	3	4	4	9
CHEMBL259682	NS(=O)(=O)c1ccc(cc1)c2cn(nn2)[C@H]3O[C@H](CO)[C@@H](O)[C@H](O)[C@@H]3O	386.09	-2.435	-8.1	26	3	4	5	10
CHEMBL3230002	CC(=O)C1=C(O)\C(=C(/O)\Nc2cccc(N\C=N\N)c2)\C(=O)OC1=O	346.091	0.666	-8	25	2	5	5	9
CHEMBL164765	CN(Cc1cnc2nc(N)nc(N)c2n1)c3ccc(cc3)C(=O)NC(C\C=C\C(=O)O)C(=O)O	466.171	0.435	-9.2	34	3	9	5	10
CHEMBL340488	C[C@H](N)C(=O)NS(=O)(=O)OC[C@H]1O[C@H]([C@H](O)[C@@H]1O)c2nc(cs2)c3ccccc3	443.082	-0.303	-8.2	29	3	7	4	10
ZINC000004565980	O=C(/C=C/c1ccc([N+](=O)[O-])cc1)c1c(O)cccc1O[C@H]1O[C@@H](CO)[C@@H](O)[C@@H](O)[C@@H]1O	447.117	0.375	-8.4	32	3	7	5	10
CHEMBL1984116	CCOC(=O)C1=CC(C)(NC2=C(N1)N=C(N)NC2=O)C(=O)OCC	337.139	-0.042	-7	24	2	4	4	9
CHEMBL1683320	O[C@@H]1[C@@H](COP(=O)(O)O)O[C@H]([C@@H]1O)n2cc(nn2)c3ccc(F)cc3	375.063	-0.187	-8.2	25	3	5	4	8
CHEMBL1892685	CC(=CCNc1ncnc2c1c(cn2C3OC(CO)C(O)C3O)C#N)C	359.159	0.293	-7.5	26	3	5	4	9
ZINC000033089255	COc1cc(/C=N/Nc2nnc3c(=O)[nH]c(O)nc3n2)cc(I)c1O	454.984	0.578	-8.3	25	3	4	4	10
CHEMBL3917709	CC(C)(CO)CNc1nc(NC2CC2)n3ncc(\C=C\4/NC(=O)NC4=O)c3n1	386.181	0.309	-7.5	28	4	7	5	9
CHEMBL2442613	N\C(=N/O)\c1ccc(nc1)c2cncc(n2)c3ccc(cn3)\C(=N\O)\N	350.124	0.79	-8.6	26	3	4	4	8
CHEMBL197524	OCC1O[C@@H](O\N=C\c2ccc(cc2)[N+](=O)[O-])C(O)[C@@H](O)C1O	328.091	-1.255	-7.5	23	2	5	4	9
CHEMBL2112868	CNc1nc(F)nc2c1ncn2[C@H]3C[C@H](OP(=O)(O)O)[C@]4(COP(=O)(O)O)C[C@H]34	453.061	0.545	-8.1	29	4	7	5	9
ZINC000409415706	COc1ccc([C@H](c2n(-c3nc[nH]n3)c(C)c(C)[n+]2[O-])C2C(=O)NC(=O)NC2=O)cc1O	441.14	-0.326	-8.5	32	4	5	4	9
ZINC000008651709	COC(=O)[C@@H]1O[C@@H](Sc2ncnc3[nH]cnc32)[C@@H](O)[C@@H](O)[C@H]1O	342.063	-1.574	-8	23	3	3	4	10
ZINC000038238855	O=C(O)C[C@H]1CCC(=O)[C@@H]1C/C=C\CCO[C@H]1O[C@@H](CO)[C@H](O)[C@@H](O)[C@@H]1O	388.173	-0.791	-7.7	27	2	9	5	8
CHEMBL1741764	Nc1nc(O)c2CN(CNc2n1)c3ccc(cc3)S(=O)(=O)N	322.085	-0.199	-7.8	22	3	2	4	8
ZINC000253534904	CNc1cc([C@H]2C[C@@H](NC(=O)Cc3c(C)nc(O)nc3O)C2)ncn1	344.16	0.633	-8	25	3	5	4	8
ZINC000031841011	O=C(O)[C@@H]1OCCOCCO[C@@H](C(=O)O)[C@@H](C(=O)O)OCCOCCO[C@H]1C(=O)O	440.117	-2.088	-6	30	1	4	4	10
CHEMBL3908950	CSc1ccc(Cc2c(C)[nH]nc2O[C@@H]3O[C@H](CO)[C@@H](O)[C@H](O)[C@H]3O)cc1	396.136	0.21	-7.5	27	3	6	5	8
ZINC000004221801	COc1ccc(C[C@H](NC(=O)C2=C[C@@H](NS(=O)(=O)c3cccs3)[C@@H](O)[C@H](O)C2)C(N)=O)cc1	495.113	-0.332	-8.2	33	3	9	5	8
ZINC000077337704	Nc1nc(CNC(=O)c2cn(CC[C@H]3CCCCN3)nn2)n[nH]1	319.187	-0.559	-8	23	3	6	4	8
CHEMBL4069700	N[C@@H](CCP(=O)(O)C(O)c1cc(cc(c1O)[N+](=O)[O-])[N+](=O)[O-])C(=O)O	379.042	0.272	-7.5	25	1	8	5	9
CHEMBL284832	COC1C(N)Cn2c1c(COC(=N)O)c3C(=O)C(=C(C)C(=O)c23)N	334.128	0.138	-6.1	24	3	3	4	8
CHEMBL3230005	CC(=O)C1=C(O)\C(=C(/O)\Nc2ccc(NS(=O)(=O)N)cc2)\C(=O)OC1=O	383.042	-0.032	-8.1	26	2	5	5	9
ZINC000033953968	CC(/C=C/C(=O)NO[C@@H]1O[C@H](CO)[C@@H](O)[C@H](O)[C@H]1O)=C\[C@@H](C)C(=O)c1ccc(N(C)C)cc1	464.216	-0.078	-7.9	33	2	9	5	9
ZINC000306121439	CN(C)C[C@H](c1ccc(O[C@@H]2O[C@H](C(=O)O)[C@@H](O)[C@H](O)[C@@H]2O)cc1)C1(O)CCCCC1	439.221	0.298	-7.5	31	3	7	5	8
ZINC000032597747	O=C(/C=C1/SC(=O)NC1=O)NCCCCCCNC(=O)/C=C1/SC(=O)NC1=O	426.067	0.513	-8.2	28	2	9	4	8
CHEMBL587948	CC1(C)NC(=NC(=N)N1OCc2nc(N)nc(Nc3ccccc3)n2)N	356.182	0.52	-8.8	26	3	5	5	9
ZINC000016189558	COC(=O)/C(=N\Nc1ccccc1[N+](=O)[O-])[C@@H](O)[C@H](O)[C@H](O)CO	343.102	-1.389	-6.5	24	1	8	5	10
CHEMBL2261930	Cl.Cn1cc(N)cc1C(=O)Nc2cc(C(=O)Nc3cc(C(=O)NCCC(=O)N)n(C)c3)n(C)c2	490.184	0.816	-7.4	34	3	8	5	8
CHEMBL201706	CNC(=O)[C@H]1S[C@H]([C@H](O)[C@@H]1O)n2cnc3c(NC)nc(Cl)nc23	358.061	-0.397	-7.5	23	3	3	4	9
ZINC000005389746	CCOc1c(C#N)c2c(ncnc2N)n1[C@H]1O[C@@H](CO)[C@@H](O)[C@H]1O	335.123	-1.105	-6.6	24	3	4	4	10
CHEMBL2359737	OC[C@H]1O[C@H]([C@H](O)[C@@H](O)[C@H]1O)c2nc(cs2)C(=O)Nc3cccc(c3)C(F)(F)F	434.076	0.929	-7.6	29	3	4	5	8
CHEMBL490844	COc1cc(cc(OC)c1OC)C(=O)N[C@H](CCC(=O)O)C(=O)NNC(=O)c2nccs2	466.116	0.593	-7.9	32	2	10	4	9
ZINC000005809188	N=C(N)N/N=C1\C(=O)N(c2cccc([N+](=O)[O-])c2)C(=O)[C@@H]1C(=O)Nc1cccc([N+](=O)[O-])c1	454.099	0.47	-9.6	33	3	6	4	9
CHEMBL417064	OC1CC(OC(COP(=O)(O)O)C1O)N2C=CC(=O)NC2=O	338.052	-2.345	-7.6	22	2	4	5	8
ZINC000004648193	CCNc1nc(NC(C)C)nc(N[C@@H](N)NOC)n1	270.192	-0.071	-6.3	19	1	8	5	9
ZINC000013736631	CN(C)[C@@H]1C(O)=C(C(N)=O)C(=O)[C@@]2(O)C(O)=C3C(=O)c4c(ccc([N+](=O)[O-])c4O)C[C@H]3C[C@@H]12	459.128	0.029	-7	33	4	3	5	10
CHEMBL3544681	CC1(C)S[C@@H](N[C@H]1C(=O)O)[C@H](NC(=O)Cc2ccccc2)C(=O)OCC(=O)CO	424.13	-0.287	-7.2	29	2	9	4	8
CHEMBL1910275	Cc1c(C#N)c(NCCO)nc2nc(NCCO)nc(N)c12	303.144	-0.405	-7	22	2	6	5	9
CHEMBL3527332	Nc1nc(N)[n+](nc1c2cccc(Cl)c2Cl)[C@@H]3O[C@@H]([C@@H](O)[C@H](O)[C@H]3O)C(=O)[O-]	431.04	-2.368	-8	28	3	3	5	10
ZINC000019333013	CC(C)C12CN3CC(C(C)C)(CN(C1)C3OC[C@H](O)[C@H](O)[C@@H](O)CO)C2=O	386.242	-1.14	-6.8	27	4	8	4	8
CHEMBL1256803	CO[C@H]1[C@@H](O)[C@H](N)[C@@H](O[C@H]2CCCC(O2)[C@H](C)N)[C@H](O)[C@@H]1N(C)C(=O)CN	390.248	-2.523	-6.4	27	2	6	5	9
ZINC000004792025	O=C1c2ccc(S(=O)(=O)O)c(O)c2C(=O)c2ccc(S(=O)(=O)O)c(O)c21	399.956	0.367	-7.5	26	3	2	4	8
ZINC000426435386	Cc1cc(O)nc(NCCNC(=O)NCc2noc(C(C)C)n2)n1	335.171	0.908	-7.9	24	2	7	4	8
ZINC000003864914	O=[N+]([O-])c1ccc(N/N=C/[C@H](O)[C@H](O)[C@H](O)CO)cc1	285.096	-0.933	-7	20	1	7	5	8
CHEMBL4076924	NC(CO)(CO)CO.OC(=O)CCN1C(=O)Oc2cc(OCc3ccccn3)c(Cl)cc12	469.125	0.357	-4.5	32	3	9	5	10
ZINC000008790197	CC(=O)N[C@@H]1[C@@H](O)[C@H](O)[C@@H](CO)O[C@H]1Oc1cc(O)c2c(=O)cc(-c3ccccc3)oc2c1	457.137	0.488	-7.6	33	4	5	5	9
ZINC000008762000	COC(=O)c1cc(NC(=O)c2ccccc2)c(=O)oc1/C=C/c1c(O)[nH]c(=O)[nH]c1=O	425.086	0.931	-8.1	31	3	5	4	8
CHEMBL55911	Nc1nc(O)c(N=O)c(NCCCO)n1	213.086	-0.043	-6.2	15	1	5	4	8
CHEMBL2062295	CN(C)C(=S)SCCn1c(C)ncc1[N+](=O)[O-].OC(C(O)C(=O)O)C(=O)O	424.072	-0.443	-5.3	27	1	7	4	10
CHEMBL358189	CNc1ncnc2c1ncn2C(CO)CC(CO)CO	281.149	-0.608	-6.8	20	2	7	4	8
CHEMBL1253739	CS[C@@H]1O[C@H](CO)[C@H](O)[C@@H]([C@H]1O)n2cc(CO)nn2	291.089	-1.887	-5.9	19	2	4	4	9
ZINC000102754519	O=C(O)CN1C(=O)N[C@@H]2O[C@@H]([C@@H]3O[C@H]4NC(=O)N(CC(=O)O)[C@H]4O3)O[C@H]21	374.071	-2.744	-8.8	26	4	5	4	8
ZINC000247793377	O[C@@H]1O[C@H]2O[C@H](O)[C@H](O)O[C@H]2O[C@@H]1O	210.038	-2.994	-6.7	14	2	0	4	8
ZINC000004403202	O=C(OC[C@@H](O)[C@@H](O)[C@H](O)[C@H](O)COC(=O)c1ccccc1)c1ccccc1	390.131	0.144	-7.6	28	2	9	4	8
CHEMBL4067679	[Na+].Nc1c2C(=O)c3ccccc3C(=O)c2c(Nc4ccc(O)cc4C(=O)O)cc1S(=O)(=O)[O-]	476.029	-0.9	-9.6	33	4	4	4	9
CHEMBL3216619	Cl.Cl.CN(C1CN=C(NC(=O)N)NC1=O)C(=O)C[C@@H](N)CS(=O)(=O)CCN	449.101	-3.098	-7	27	1	7	5	8
CHEMBL3211188	Cc1cc(Cl)ccc1OCC(=O)N\N=C\c2ccc(OC3OC(CO)C(O)C(O)C3O)cc2	480.13	0.356	-8.4	33	3	8	5	9
CHEMBL1822740	CO[C@@H]1CN(C[C@H]2O[C@H](OC)[C@H](O)[C@@H](O)[C@@H]2O)C[C@@H](CO)O1	323.158	-2.894	-6.9	22	2	5	4	9
ZINC000003177197	Cc1ccc([N+](=O)[O-])cc1NNC1=NC(CO)(CO)COC1=O	324.107	-0.502	-7.7	23	2	5	4	9
ZINC000035271762	C=C[C@]1(C)C[C@@H](OC(=O)C(=C)[C@H](O)CO)[C@H](C(=C)C(=O)OC)[C@H](O)[C@@H]1C(=C)CO	410.194	0.275	-5.8	29	1	9	4	8
CHEMBL520964	OC[C@@H](O)[C@@H](O)[C@H](O)c1c[nH]c(n1)c2nocn2	256.081	-1.793	-6.7	18	2	5	5	8
CHEMBL145474	Nc1ncnc2c1ncn2\C=C\3/CC3COP(=O)(O)P(=O)(O)P(=O)(O)O	425.006	0.749	-7.7	26	3	6	5	9
ZINC000005425214	Nc1nc(N)c(N)c(OS(=O)(=O)O)n1	221.022	-1.595	-6.2	14	1	2	4	8
CHEMBL2371663	CC(C)(C)OC(=O)N1CCC[C@H]1C(=O)N[C@@H](CCC\N=C(/N)\N[N+](=O)[O-])C(=O)NCC(=O)N	472.239	-1.652	-7.5	33	1	10	5	8
CHEMBL1091132	CO[C@@H]1O[C@H](Cn2cc(nn2)c3ccc(N)cc3)[C@H](O)[C@H](O)[C@H]1O	336.143	-1.019	-7.8	24	3	4	4	9
ZINC000016383433	O=C1NC(=S)N=C(O)/C1=C/NNc1cc([N+](=O)[O-])cc([N+](=O)[O-])c1	352.023	0.675	-7.7	24	2	5	4	8
CHEMBL1159788	CO\N=C(/C(=O)NC1CN2N(C1=O)C(=C(C(=O)O)C2(C)C)C(=O)O)\c3csc(N)n3	438.096	-1.165	-7	30	3	6	4	10
CHEMBL43620	COC(=O)CCNC(=O)[C@@H]1C[C@@H](CN1)SC2=C(N3[C@H]([C@H]2C)[C@@H]([C@@H](C)O)C3=O)C(=O)O	441.157	-0.717	-6.5	30	3	8	4	8
ZINC000001628370	Nc1nc(N)c2nc3c(nc(O)[nH]c3=O)nc2n1	246.061	-1.474	-7.7	18	3	0	4	9
CHEMBL3208034	Oc1cccc(\C=N\NC(=O)Cc2nnc(O)nc2O)c1	289.081	-0.319	-8.3	21	2	4	4	8
CHEMBL2337524	NS(=O)(=O)OC[C@H]1O[C@@H](O)[C@@H](O)[C@@H](O)[C@@H]1O	259.036	-3.994	-6.3	16	1	3	5	8
CHEMBL30128	Nc1ncnc2c1ncn2OC(CO)\C=C\P(=O)(O)O	301.058	-1.111	-7.3	20	2	5	4	8
CHEMBL1852116	N[C@@H](CO)C(=O)N1CC2(C[C@H]1C(=O)NCCCCCC(=O)NO)SCCS2	420.15	-0.735	-6.9	27	2	9	5	8
CHEMBL3707124	CO[C@@]12C(COC(=O)N)C3=C(N1CC4NC24)C(=O)C(=C(NCCc5c[nH]cn5)C3=O)C	428.181	-1.054	-7.6	31	5	7	4	9
ZINC000016138139	O=C1NC(=S)NC(=O)C1=CN1CCN(C=C2C(=O)NC(=S)NC2=O)CC1	394.052	-2.566	-7.8	26	3	2	4	8
ZINC000005201828	COC(=O)[C@@H](O)[C@@H](O)[C@H](O)[C@H](O)C(=O)OC	238.069	-3.224	-5.7	16	0	5	4	8
ZINC000013125172	COC(=O)C1=C(O)[C@@]2(C(=O)O)CC(C(=O)OC)=C(O)[C@@](C(=O)O)(C1)C2	356.074	0.296	-6.5	25	2	4	4	8
CHEMBL317521	COC(=O)[C@H](CCN)NC(=O)[C@@H](N)CCC\N=C(/N)\N[N+](=O)[O-]	333.176	-2.803	-6.8	23	0	10	5	8
ZINC000001871640	OCN(CO)c1nc(CCC(Cl)(Cl)Cl)nc(N(CO)CO)n1	375.027	-0.414	-6.3	22	1	8	4	9
CHEMBL1617597	N[C@@H](CO)c1oc(nn1)[C@H](CC(=O)O)NC(=O)C2CCNCC2	327.154	-1.307	-7.6	23	2	7	5	8
ZINC000031161007	O=C(O)[C@H]1O[C@@H](Oc2cc(O)c3c(=O)cc(-c4ccccc4)oc3c2)[C@H](O)[C@@H](O)[C@@H]1O	430.09	0.437	-9.3	31	4	4	5	9
CHEMBL83923	CC(N(Cc1cc(cc2nc(O)c(O)nc12)[N+](=O)[O-])C(=O)C)P(=O)(O)O	386.063	0.821	-8.6	26	2	5	4	8
CHEMBL2008380	C1CN=C(N\N=C\c2ccc(cc2)c3cn4cc(\C=N\NC5=NCCN5)ccc4n3)N1	414.203	0.767	-7.6	31	5	5	4	10
ZINC000016321039	CC(=O)NC1=NN(c2ccccc2)C(=O)[C@@H]1S[C@@H]1N=C(N)NN1	333.101	-0.709	-8.4	23	3	3	4	8
ZINC000085392041	Cn1c(S)nnc1[C@@H](O)[C@H](O)c1n[nH]c(=S)n1C	288.046	-0.338	-6.5	18	2	3	4	9
CHEMBL2111568	C[C@@H](O)[C@@H]1[C@H]2[C@@H](C)C(=C(N2C1=O)C(=O)O)S[C@@H]3CN[C@@H](C3)\C=C/c4onc(CO)c4	435.146	0.797	-7.6	30	4	7	4	8
ZINC000230141294	C=C[C@@H]1CS[C@H]2[C@H](NC(=O)/C(=N/OCC(=O)O)c3c[nH]c(N)n3)C(=O)N2[C@H]1C(=O)O	438.096	-1.547	-7.2	30	3	8	5	9
ZINC000100023235	O/N=C1\c2nn[nH]c2/C(=N\O)c2nn[nH]c21	220.046	-1.311	-7.8	16	3	0	4	8
CHEMBL3317459	CC(=O)C1(CCN2CCCC2)CCOC1=O.OC(C(O)C(=O)O)C(=O)O	375.153	-1.128	-6.6	26	2	7	4	8
CHEMBL4103055	CN[C@H]1CC[C@@H](O[C@@H]1C)c2ccc(O)c3[C@H](O)C45OC4([C@@H](O)[C@@H](CC(=O)O)O[C@@H]5C)C(=O)c23	463.184	0.581	-7.5	33	5	4	5	9
ZINC000005949148	O=C(CSc1nc2ccccc2nc1SCC(=O)NCCO)NCCO	396.093	0.031	-6.9	26	2	10	4	8
CHEMBL3311443	OC[C@H]1O[C@@]2(SC3=NCCN3C2=O)[C@H](O)[C@@H](O)[C@@H]1O	290.057	-2.898	-7	19	3	1	4	8
CHEMBL2104121	[Cl-].Cc1ncc(C[n+]2csc(CCOP(=O)(O)OP(=O)(O)O)c2C)c(N)n1	460.014	-2.154	-1.1	27	2	8	4	8
CHEMBL4096324	CCCCCCc1ccc(O[C@H]2O[C@H](COS(=O)(=O)O)[C@@H](O)[C@H](O)[C@H]2O)cc1	420.145	0.815	-7.5	28	2	10	4	8
ZINC000039264111	NC(=O)[C@@H]1OCCOCCO[C@H](C(N)=O)[C@@H](C(N)=O)OCCOCCO[C@@H]1C(N)=O	436.181	-4.485	-6.5	30	1	4	4	10
ZINC000031501427	CN(CCC[C@@H](O[C@@H]1O[C@H](C(=O)O)[C@@H](O)[C@H](O)[C@H]1O)c1cccnc1)N=O	385.149	-0.575	-7.8	27	2	9	4	9
ZINC000100133150	NS(=O)(=O)c1ccc(/N=N\c2nc3c(nc(O)nc3O)[nH]2)cc1	335.044	0.827	-8.3	23	3	3	4	9
ZINC000085879442	COc1cc(/C=C/C(=O)c2nc3ccccc3[nH]2)ccc1O[C@@H]1O[C@H](CO)[C@H](O)[C@H](O)[C@H]1O	456.153	0.646	-8.1	33	4	7	5	9
CHEMBL608454	O[C@@H]1[C@H](O)[C@H](OC1N2C=C(F)C(=NC2=O)NC(=O)OCC=C)C(=O)O	359.076	-1.179	-7.4	25	2	5	4	9
CHEMBL220921	COC(=O)[C@@H](CSC(=O)[C@@]1(NC(=O)[C@H](CCCl)[C@]1(C)O)[C@@H](O)[C@H]2CCCC=C2)NC(=O)C	490.154	0.506	-6.5	32	2	9	4	8
CHEMBL1938668	CCOC(=O)c1ncccc1C#Cc2c(Cl)nc(N)nc2N[C@@H]3C[C@H](CO)[C@@H](O)[C@H]3O	447.131	0.198	-7.3	31	3	5	5	10
CHEMBL1802110	Cl.CN(C)Cc1onc(c1)c2nc(c[nH]2)[C@@H](O)[C@H](O)[C@H](O)CO	348.12	-0.704	-6.9	23	2	7	5	8
CHEMBL2260646	Cc1ccc2cc3c(\N=C\OC[C@@H](O)[C@@H](O)[C@H](O)C=O)n[nH]c3nc2c1	358.128	0.378	-8.5	26	3	7	4	8
CHEMBL398269	OC[C@H]1O[C@H]([C@H](O)[C@@H]1O)n2cc(CO)nn2	231.086	-2.618	-6.4	16	2	3	4	8
ZINC000257270647	CC(C)(C)OC(=O)N[C@@H]1CC[C@@H](n2cc(F)c(O)nc2=O)[C@@H](O)[C@@H]1O	359.149	0.038	-7.6	25	2	2	4	8
CHEMBL3125441	C[C@@H]1CC(O)\C=C\C(O)C(O)CC(=O)Cc2c(Cl)c(O)cc(O)c2C(=O)O1	400.092	0.841	-7	27	2	0	5	8
CHEMBL1473216	CN(C)C1C2CC3C(O)c4c(Cl)ccc(O)c4C(=O)C3C(=O)C2(O)C(=O)C(C(=O)N)C1=O	464.099	-0.989	-6.9	32	4	2	4	9
ZINC000018096883	COC(=O)[C@@H](NC(=O)C(=O)N[C@@H](C(=O)OC)C(C)(C)S)C(C)(C)S	380.108	-0.281	-6.3	24	0	6	4	8
ZINC000008627226	Nc1nc(O)c2c(n1)NCN(c1ccc(S(=O)(=O)O)cc1)C2	323.069	0.401	-7.9	22	3	2	4	8
ZINC000095470954	O=C1NC(=S)NC(=O)C1=CNc1cc([N+](=O)[O-])cc([N+](=O)[O-])c1O	353.007	0.035	-7.9	24	2	4	4	9
ZINC000101681681	Cc1n[nH]c(=S)n(NC(=O)/C=C/C(=O)Nn2c(=O)c(C)n[nH]c2=S)c1=O	396.042	-1.071	-7.5	26	2	4	4	10
CHEMBL3391914	COC(=N)c1csc(n1)[C@@H]2O[C@H](CO)[C@@H](O)[C@H]2O	274.062	-0.731	-6.5	18	2	3	4	8
ZINC000072433567	Nc1nc(CNc2nc(N)nc3c2CCNCC3)cs1	291.127	0.398	-7.4	20	3	3	4	8
CHEMBL3542375	CC(C)[C@]1(C)SC(=NC1=O)N[C@H]2C[C@H]3C[C@@H]2C[C@H]3O[C@@H]4O[C@@H]([C@@H](O)[C@H](O)[C@H]4O)C(=O)O	458.172	-0.304	-8.6	31	4	5	5	9
ZINC000225438270	CC(C)(C)c1cc(/C=N/NC2=NCCN2)c(O)c(/C=N/NC2=NCCN2)c1	370.223	0.455	-8.4	27	3	4	5	9
CHEMBL332657	Nc1ccc(cc1SSc2cc(ccc2N)S(=O)(=O)N)S(=O)(=O)N	405.99	0.945	-8	24	2	5	4	8
CHEMBL610629	OC[C@H]1O[C@@H](NC(=O)C2=COc3ccccc3O2)[C@H](O)[C@@H](O)[C@@H]1O	339.095	-1.785	-8.4	24	3	3	5	8
CHEMBL2373947	CSc1nc(N)c2ncn([C@H]3[C@H](O)[C@H](O)[C@@]4(COP(=O)(O)O)CC34)c2n1	403.072	-0.477	-7.5	26	4	5	5	10
CHEMBL1208614	CCOC(CCCN)O[C@@H]1O[C@@H]([C@@H](O)[C@H](O)[C@H]1O)C(=O)O	309.142	-2.003	-6.6	21	1	8	5	8
CHEMBL454627	CCC1CC1[C@H](O)[C@H](O)C2=C(C)C(=O)[C@@]3(O2)[C@@H](O)[C@](NC3=O)(OC)C(=O)c4ccccc4	445.174	0.083	-7.4	32	4	7	4	8
ZINC000245229464	N1SNSNSNS1	187.932	0.611	-4.3	8	1	0	4	8
CHEMBL3221803	O[C@@H]1C[C@@](O)(C=C([C@H]1O)c2cn(nn2)c3cccnc3)C(=O)O	318.096	-1.013	-7.9	23	3	3	4	8
CHEMBL1871055	OC[C@H]1O[C@H]([C@H](O)[C@@H](O)[C@H]1O)c2onc(n2)c3ccc4OCCc4c3	350.111	-0.814	-8	25	4	3	4	9
CHEMBL2237502	COc1cc(Cc2cnc(N)nc2N)cc(OC)c1OC.OC(=O)\C=C/C(=O)O	406.149	0.969	-4.8	29	2	7	4	9
CHEMBL307109	OCN1C(=O)C2C3C(C(C4C(C3C(=O)O)C(=O)N(CO)C4=O)C(=O)O)C2C1=O	396.08	-3.25	-7.7	28	4	4	4	8
CHEMBL10591	Nc1nc(N)c2nc(CSc3ccc(cc3)C(=O)NC(CCC(=O)O)C(=O)O)cnc2n1	457.117	0.924	-8.4	32	3	9	5	10
CHEMBL462959	O[C@H]1CC[C@H](O)[C@@H]2[C@@H]1C[C@@]34SS[C@]5(C[C@@H]6[C@@H](O)CC[C@H](O)[C@H]6N5C3=O)C(=O)N24	428.108	-0.747	-6.5	28	7	0	4	8
CHEMBL1852234	CC(=O)c1c(C)onc1c2nc(c[nH]2)[C@@H](O)[C@H](O)[C@H](O)CO	311.112	-0.677	-7.5	22	2	6	5	8
ZINC000001627867	COC(=O)[C@@H](C(=O)C(=O)Nc1nnc(S)[nH]1)c1csc(N)n1	342.02	-0.404	-7.3	22	2	5	4	10
ZINC000218254352	Nc1nc(NCc2nnn[nH]2)cc(C2CC(N)C2)n1	261.145	-0.611	-7.8	19	3	4	4	8
CHEMBL1990165	N.NS(=O)(=O)c1nc(c2[nH]cnc2n1)S(=O)(=O)O	296	-1.591	-1.2	18	2	2	4	8
CHEMBL4077013	Clc1nc(NNC(=O)c2ccncc2)nc(NNC(=O)c3ccncc3)n1	385.08	0.829	-9.1	27	3	6	4	9
CHEMBL331386	NCC(=O)NCCC(=O)Nc1nnc(s1)S(=O)(=O)N	308.036	-2.411	-6.5	19	1	6	4	8
CHEMBL1962577	COC(=O)C1=CO[C@@H](O[C@@H]2O[C@H](CO)[C@@H](O)[C@H](O)[C@H]2O)[C@H](C=C)[C@@H]1\C=C\c3ccc[n+](CCO)c3	494.202	-1.372	-7.9	35	3	9	5	10
CHEMBL1091856	OC(CCCCOc1nonc1S(=O)(=O)c2ccccc2)(P(=O)(O)O)P(=O)(O)O	472.011	0.453	-7.6	29	2	10	5	9
ZINC000044699305	Cc1cc(=O)oc2cc(O[C@H]3O[C@H](CO)[C@@H](O)[C@H](O)[C@H]3NS(=O)(=O)O)ccc12	417.073	-1.32	-8.1	28	3	5	5	9
CHEMBL1982106	CC(=O)NNc1nc(C)c(s1)C(=O)NNC(=O)C(=O)Nc2cccc(c2)C(=O)C	418.106	0.517	-8.2	29	2	5	5	8
ZINC000002957641	Cc1cccc(-n2nnc(C(=O)NCCNC(=O)c3nnn(-c4cccc(C)c4)c3N)c2N)c1	460.208	0.789	-9	34	4	7	4	10
CHEMBL3230041	CC(=O)C1=C(O)\C(=C(/O)\Nc2ccc(NC=O)cc2)\C(=O)OC1=O	332.064	0.921	-7.8	24	2	5	4	8
CHEMBL3960449	CC(C)Oc1ccc(Cc2c(C)[nH]nc2O[C@@H]3O[C@H](CO)[C@@H](O)[C@H](O)[C@H]3O)cc1	408.19	0.275	-8.1	29	3	7	5	8
ZINC000061947659	Nc1ccn([C@@H]2O[C@H](COS(=O)(=O)O)[C@@H](O)[C@H]2O)c(=O)n1	323.042	-2.736	-6.7	21	2	4	4	10
ZINC000012311574	NS(=O)(=O)c1ccc(N/N=C/c2ccc(O)c(O)c2O)c([N+](=O)[O-])c1	368.043	0.805	-7.9	25	2	5	5	9
CHEMBL1179712	NC1=NC(=N)C2C(N=CN2COCCO)C(=N1)N	253.129	-2.303	-6.3	18	2	4	4	8
CHEMBL4113306	N[C@@H]1CCCC[C@H]1Nc2nc(NC3CC3)n4ncc(\C=C\5/NC(=O)NC5=O)c4n2	397.197	0.561	-8.5	29	5	5	5	9
CHEMBL1336691	Nc1nc(N)nc(n1)c2ccccc2c3nc(N)nc(N)n3	296.125	-0.281	-8.1	22	3	2	4	10
CHEMBL1254938	Nc1nc(N)c2nc(CNCCc3ccc(cc3)S(=O)(=O)O)cnc2n1	375.111	0.163	-8.5	26	3	6	4	9
ZINC000008711041	NC(=O)c1ccsc1NC(=O)CSc1nc(N)cc(N)n1	324.046	0.532	-7.7	21	2	5	4	8
CHEMBL20368	CC1(C)N=C(N)N=C(N)N1c2cccc(CNc3cc(cc(c3)C(=O)N)C(=O)N)c2	408.202	0.682	9.1	30	3	6	5	8
CHEMBL27045	Cc1ncc(COP(=O)(O)O)c(\C=N\OCC(O)CN)c1O	335.088	-0.625	-6.5	22	1	8	5	8
ZINC000019170552	O=S1(=O)C[C@H](O)[C@H](NN[C@@H]2CS(=O)(=O)C[C@@H]2O)C1	300.045	-3.604	-7	18	2	3	4	8
CHEMBL2447905	N.N.OS(=O)(=O)OOS(=O)(=O)O	227.972	-1.136	-1.2	12	0	3	4	8
CHEMBL280929	CC1OC(OC2CCCCC2OC(=O)N3CCC(CC3)(C(=O)O)C(=O)O)C(O)C(O)C1O	461.19	-0.47	-8.5	32	3	5	5	9
CHEMBL3918554	O=C1NC(=O)\C(=C\c2cnn3c(NC4CC4)nc(NC5CC5)nc23)\N1	340.14	0.453	-8.7	25	5	5	4	8
CHEMBL1366768	Cc1occc1c2oc(SCCNCCO)nn2.OC(=O)C(=O)O	359.079	0.468	-3.7	24	2	7	4	9
ZINC000003025846	O=C1NC(=O)C(=CNc2ccc(S(=O)(=O)Nc3nccs3)cc2)C(=O)N1	393.02	0.606	-8.4	26	3	5	4	8
CHEMBL218765	N[C@@H]1C[C@H](N)CN(C1)c2nc(Nc3ccc(Br)cc3)nc(n2)N4C[C@H](N)C[C@H](N)C4	476.176	0.107	-8.8	30	4	4	5	10
ZINC000005379987	OCC(CO)(CO)Nc1ncc(-c2nc3ccccc3o2)cn1	316.117	0.412	-7.5	23	3	6	4	8
CHEMBL609498	NC(CCC(=O)O)C(=O)OC[C@H]1OC(O)[C@H](O)[C@@H]1O	279.095	-2.839	-6.6	19	1	6	5	8
CHEMBL424000	[Na+].Nc1nc(cc(c2cccc(NC(=O)C(O)CCC(=O)[O-])c2)c1C#N)c3ccc(O)cc3	454.125	-1.591	-8.4	33	3	7	4	8
ZINC000257300635	CN[C@H]1CC[C@@](O)(Cn2cnc3c2ncnc3N)[C@H](O)C1	292.165	-0.728	-7.5	21	3	3	4	8
CHEMBL164780	COC1OC(CO)C(Sc2nc(CO)ccc2O)C(O)C1O	333.088	-1.174	-6.7	22	2	5	5	9
ZINC000002933910	O=C(Nn1c(=O)c2cc3c(cc2c1=O)c(=O)n(NC(=O)c1ccc(O)cc1)c3=O)c1ccc(O)cc1	486.081	0.091	-9.1	36	5	4	4	10
ZINC000001607873	COC(=O)NC1(NC(=O)OC)Nc2cc(OC)c(OC)cc2C(=O)N1	354.118	0.182	-6.7	25	2	4	4	8
ZINC000100838367	CC(=N/O)/C(=N\O)C(=N/O)/C(C)=N\O	202.07	0.347	-6.3	14	0	3	4	8
CHEMBL309554	Nc1nc(O)c(N=O)c(NC[C@H]2C[C@H]2CO)n1	239.102	0.203	-6.6	17	2	5	4	8
CHEMBL191045	NS(=O)(=O)c1ccc(CNc2nc(Cl)nc(NCC(=O)O)n2)cc1	372.041	0.281	-8.4	24	2	7	4	8
ZINC000077304050	O[C@@]1(CNCc2n[nH]c(-c3cnccn3)n2)CNCCOC1	305.16	-1.298	-7.9	22	3	5	4	8
CHEMBL219798	N[C@@H]1C[C@H](N)CN(C1)c2nc(N)nc(n2)N3C[C@H](N)C[C@H](N)C3	322.234	-2.817	-7.7	23	3	2	5	10
CHEMBL3933068	COC[C@@H]1CCCN1Nc2nc(NC3CC3)n4ncc(\C=C\5/NC(=O)NC5=O)c4n2	413.192	0.317	-8.4	30	5	7	4	10
CHEMBL3238483	Cc1cc(cc(C)c1N\N=C\2/C(=O)c3c([NH3+])cc(cc3C=C2S(=O)(=O)O)S(=O)(=O)[O-])C(=O)O	495.041	0.672	-8.5	33	3	5	4	9
ZINC000001606866	Nc1nc(N)nc([C@H]2CC[C@@H]2c2nc(N)nc(N)n2)n1	274.14	-0.953	-7.6	20	3	2	4	10
CHEMBL1981957	C[S+](=O)(N)CCC(N)P(=O)(O)O.[O-]c1c(cc(cc1[N+](=O)[O-])[N+](=O)[O-])[N+](=O)[O-]	445.03	-0.673	-5.1	28	1	7	4	10
CHEMBL1205886	FC(F)(F)c1cc(NC(=O)c2nnn[nH]2)c(Cl)c(NC(=O)c3nnn[nH]3)c1	402.032	0.89	-8.3	27	3	4	4	8
CHEMBL348752	COC1OC(CO)C(Sc2nc(C)ccc2O)C(O)C1O	317.093	-0.358	-6.6	21	2	4	4	8
ZINC000016576494	C[C@@H](CO)NC(=O)CSc1nc2cc([N+](=O)[O-])ccc2n1CC(=O)N[C@@H](C)CO	425.137	0.031	-7.5	29	2	10	4	9
CHEMBL1098182	C[C@@H](O)CNC(=O)C[C@H]1O[C@@H](CNCCNc2ccccn2)[C@H]3OC(C)(C)O[C@@H]13	408.237	0.258	-7.4	29	3	10	4	8
CHEMBL25529	Oc1nc2c(Cc3c(Cc4nn[nH]n4)cccc23)n5cc(nc15)P(=O)(O)O	385.069	-0.087	-8.5	27	5	3	4	8
CHEMBL1869608	OC(C(O)C(O)C1=NC2C=CC=CC2=N1)C(O)C3=NC4C=CC=CC4=N3	354.133	-0.875	-8.7	26	4	5	4	8
CHEMBL4080604	[Na+].NS(=O)(=O)c1ccc(NC(=S)N\N=C\2/C(=O)Nc3ccc(cc23)S(=O)(=O)[O-])cc1	476.985	-3.115	-1.1	30	3	4	4	8
CHEMBL603719	CNc1nn(C2O[C@H](CO)[C@@H](O)[C@H]2O)c3N=CNC(=O)c13	297.107	-2.227	-7.4	21	3	3	5	9
ZINC000005558825	COc1ccc(N2C(=O)NC(=O)/C(=C/NC(CO)(CO)CO)C2=O)cc1	365.122	-1.533	-6.8	26	2	7	5	8
CHEMBL3273014	C[C@H](NC(=O)C)C(=O)N[C@@H](C)C(=O)N1CCC[C@H]1C(=O)NN(C)C(=O)O[C@@H](C)C(=O)N(C)N	471.244	-2.173	-8.3	33	1	7	4	8
ZINC000032597750	O=C(/C=C1\NC(=O)SC1=O)NCCNC(=O)/C=C1\SC(=O)NC1=O	370.004	-1.047	-8.3	24	2	5	4	8
ZINC000009882564	Nc1nc(N)nc(SCC(=O)NC(=O)N[C@@H]2CCS(=O)(=O)C2)n1	361.063	-1.859	-8.1	23	2	4	4	10
CHEMBL3144008	OC[C@H]1O[C@H]([C@H](O)[C@@H]1O)C2=NNC3C(=O)N=CN=C23	268.081	-3.195	-7.3	19	3	2	4	8
CHEMBL1183999	CN(C1CN=C(NC(=O)N)NC1=O)C(=O)C[C@@H](N)c2csc(CN)n2	368.138	-2.027	-7.7	25	2	5	5	8
ZINC000002250355	CCOc1nc(NCC(=O)O)nc(NCC(=O)O)n1	271.092	-0.737	-6.4	19	1	8	4	8
CHEMBL3988738	CNS(=O)(=O)CCNc1nc(NCCO)c2cnn(C)c2n1	329.127	-1.271	-6.6	22	2	8	4	9
CHEMBL3426122	COC(=O)OC[C@@H](O)[C@@H](O)[C@@H]1O[C@](F)([C@H](F)[C@H](N)[C@H]1NC(=O)C)C(=O)OC	400.129	-2.101	-6.4	27	1	6	4	10
CHEMBL1536870	SC1=NCCOCCOCCOCCN=C(S)NCCOCCOCCOCCN1	468.208	-0.15	-6.2	30	1	0	4	10
CHEMBL363874	Nc1nc(N)nc(NCc2ccc(cc2)S(=O)(=O)N)n1	295.085	-0.705	-7.7	20	2	4	4	8
CHEMBL4081266	CC1(C)CC(CC(C)(CNC(=O)n2cnc(N)n2)C1)NC(=O)n3cnc(N)n3	390.224	0.435	-8.8	28	3	3	4	10
ZINC000095117211	NNS(=O)(=O)c1ccc2c(c1)oc(=O)c1cc(S(=O)(=O)NN)ccc21	384.02	-0.75	-9.1	25	3	4	4	8
CHEMBL3144040	CN1N=C([C@@H]2O[C@H](CO)[C@@H](O)[C@H]2O)C(=O)C1C(=O)N	273.096	-3.808	-7.2	19	2	3	4	8
CHEMBL3426104	CC(=O)N[C@@H]1[C@@H](N)[C@@H](F)[C@@](F)(O[C@H]1[C@H](O)[C@H](O)CO)C(=O)OCCCOC(=O)C(C)(C)C	470.208	-1.542	-6.8	32	1	9	5	10
CHEMBL3954418	N[C@@H]1CC[C@H](CC1)Nc2nc(NC3CC3)n4ncc(\C=C\5/NC(=O)NC5=O)c4n2	397.197	0.561	-8.9	29	5	5	5	9
ZINC000223855695	COCc1nc(NCc2n[nH]c(N)n2)cc(C2CC(N)C2)n1	304.176	0.14	-7.6	22	3	6	4	8
ZINC000003150912	N=C(N/N=C/c1cc(Br)cc([N+](=O)[O-])c1O)c1nonc1N	368.982	0.977	-8	22	2	4	4	9
CHEMBL557428	Cl.CN\C(=C/[N+](=O)[O-])\NCc1cccc(n1)c2csc(N=C(N)N)n2	384.088	0.916	-7.8	25	2	7	4	8
ZINC000253405277	CC(=O)c1c2c(c(O)c(C)c1O)[C@]1(C)C(=CC(=O)/C(=C(/C)NCCS(N)(=O)=O)C1=O)O2	450.11	0.447	-7.5	31	3	5	4	9
CHEMBL189526	NS(=O)(=O)c1ccc(CCNc2nc(Cl)nc(NCC(=O)O)n2)cc1	386.056	0.323	-8.1	25	2	8	4	8
CHEMBL111844	CSC[S+]([O-])CC(CO)NC(=O)\C=C/c1cnc(O)nc1O	347.061	-0.553	-6.6	22	1	8	4	8
ZINC000033937592	NOC(=O)[C@H](O)[C@@H](O)C(=O)ON	180.038	-3.458	-5.1	12	0	3	4	8
CHEMBL1532877	SC1=NCCOCCN=C(S)NCCOCCOCCOCCN1	380.155	-0.183	-5.7	24	1	0	4	8
CHEMBL474736	[Na+].O[C@H]1C=C2[C@@H](NC(=O)c3c(OP(=O)([O-])OCc4ccccc4)c5OCOc5cc23)[C@H](O)[C@@H]1O	499.064	-2.925	-7.7	34	5	5	4	10
CHEMBL525202	Cc1nc(NCc2ccccc2)sc1C[C@@H]3O[C@H](CO)[C@H](O)[C@H](O)[C@H]3O	380.141	0.449	-8.1	26	3	6	5	8
CHEMBL319348	C\C(=C\c1ccc(OCC=C)c(NS(=O)(=O)C)c1)\C(=O)N[C@@H]2[C@H](O)[C@@H](O)[C@H]3OCO[C@H]3[C@@H]2O	484.152	-0.651	-8	33	3	8	5	9
CHEMBL3426128	COC(=O)[C@]1(F)O[C@@H]([C@H](O)[C@H](O)COP(=O)(C)OC)[C@H](NC(=O)C)[C@@H](N)[C@H]1F	434.127	-1.398	-6.7	28	1	8	4	10
ZINC000245224557	CN1N=C(O)C(=O)N[C@@H]1SCC1=C(C(=O)O)[C@@H]2C(=O)[C@@H](N)[C@@H]2SC1	372.056	-1.041	-8	24	3	4	4	8
ZINC000003408549	COCCNc1nnc(SCC(=O)Nc2cc(C(N)=O)cc(C(N)=O)c2)s1	410.083	0.525	-7.8	27	2	10	4	9
CHEMBL1744156	[Na+].Nc1c(O)c2c(O)cc(cc2cc1S(=O)(=O)O)S(=O)(=O)[O-]	356.959	-3.012	-1.1	22	2	2	4	8
CHEMBL515014	O[C@H]1[C@@H](O)[C@@H]2NC(=O)c3c(O)c4OCOc4cc3[C@H]2[C@@H](OC(=O)c5ccccc5)[C@@H]1O	429.106	-0.362	-8.2	31	5	2	5	9
ZINC000001559380	Nc1nc(N)c2nc(CNc3ccc(C(=O)O)cc3)cnc2n1	311.113	0.894	-8.1	23	3	4	4	8
CHEMBL133039	[Na+].COc1ccc(CCC(=N)c2c(O)cc(OCC(=O)[O-])cc2O)cc1O	383.098	-2.055	-8.3	27	2	8	4	8
CHEMBL433664	Nc1ncnc2nn(C[C@@H](CO)OCP(=O)(O)O)nc12	304.069	-1.684	-6.9	20	2	6	4	9
CHEMBL2036385	CCCNc1nc(N)nc2c1ncn2\C=C/3\CC3(CO)CO	304.165	0.446	-7	22	3	6	4	8
ZINC000035645789	CC(=O)N[C@H]1[C@@H](O)[C@H](O)[C@H](COS(=O)(=O)O)O[C@@H]1Oc1ccc([N+](=O)[O-])cc1	422.063	-1.256	-7.8	28	2	7	4	10
ZINC000096568898	CCOC(=O)NC(=O)/C=C(\C)NCCCN/C(C)=C/C(=O)NC(=O)OCC	384.201	0.909	-7.1	27	0	10	4	8
CHEMBL1995164	CC(=O)c1cccc(NC(=O)C(=O)Nn2c(N)nnc2N)c1	303.108	-0.646	-8.3	22	2	3	4	8
ZINC000008653118	COC(=O)c1nc(N)[nH]c(=O)c1CCCCCc1c(C(=O)OC)nc(N)[nH]c1=O	406.16	-0.454	-6.8	29	2	8	4	10
ZINC000085876748	CCN1C(=O)/C(=C\c2ccc(O[C@@H]3O[C@H](CO)[C@H](O)[C@H](O)[C@H]3O)c(OC)c2)SC1=S	457.087	0.095	-7.8	30	3	6	4	10
ZINC000021982914	CC(=O)[C@]1(N)Cc2c(O)c3c(c(O)c2[C@@H](O[C@@H]2C[C@@H](O)[C@@H](O)CO2)C1)C(=O)c1ccccc1C3=O	483.153	0.632	-8.2	35	5	3	5	10
CHEMBL1741395	N1NC(=NN=C1c2nnn[nH]2)c3nnn[nH]3	220.068	-3.071	-7.2	16	3	2	4	10
CHEMBL366730	[Na+].Nc1nc(cc(c2cccc(NC(=O)C(O)CCC(=O)[O-])c2)c1C#N)c3cc(F)ccc3O	472.116	-1.452	-8.1	34	3	7	4	8
ZINC000255967950	CC(C)N(CC(=O)OC[C@H](O)[C@H](O)[C@@H](O)[C@H](O)C(=O)O)C(C)C	337.174	-1.823	-6.3	23	0	10	5	8
CHEMBL287830	Nc1ncnc2c1ncn2NCCOCP(=O)(O)O	288.074	-0.896	-6.8	19	2	6	4	8
ZINC000004922507	CCNC(=O)NC(=O)[C@@H](Sc1nc(N)nc(N)n1)c1ccccc1	347.116	0.715	-7.9	24	2	5	4	8
CHEMBL582936	OP(=O)(O)OP(=O)(O)OP(=O)(O)CCCN1C=CC(=O)NC1=O	393.973	-0.662	-7.8	23	1	8	5	8
ZINC001570001716	C[C@H]1O[C@@](O)(O[n+]2cccc([C@@H]3C[C@@H](O)C(=O)N3C)c2)[C@H](O)[C@@H](O)[C@@H]1O	371.145	-3.186	-8.3	26	3	3	5	8
CHEMBL4092093	CC(C)CC1N(C(=NC1=O)N)c2nc(NC(=N)N)nc(Nc3ccccc3)n2	382.198	0.997	-8.7	28	3	6	5	8
CHEMBL4107314	C[C@@]1(N=C(N)OCC1(F)F)c2nc(NC(=O)c3ncc(cc3N)C#CCO)ccc2F	434.131	0.989	-7.7	31	3	3	4	8
CHEMBL1592362	Nc1cc(N)nc(SCC(=O)Nc2nonc2N)n1	282.065	-0.663	-7.7	19	2	4	4	10
CHEMBL3349025	Nc1ncnc2c1ncn2[C@@H]3O[C@@H](C=NO)[C@@H](O)[C@H]3O	280.092	-1.512	-7.7	20	3	2	4	10
ZINC000016249425	Cc1nc2ncnn2c(O)c1NS(=O)(=O)c1ccc2[nH]c(=O)[nH]c2c1	361.059	0.109	-8.7	25	4	3	4	8
ZINC000072312189	COc1nc(NCC(=O)NC(C)(C)C)nc(NCC(=O)NC(C)(C)C)n1	367.233	0.533	-8	26	1	7	4	8
CHEMBL3278663	Nc1nc(O)c2N=C(CNc2n1)\C=N\O	208.071	-0.278	-6.8	15	2	1	4	8
CHEMBL18049	CON(C)[C@@]12NC(=O)C(NC1=O)(OCCC2=C)[C@@H](O)[C@@](C)(O)CO	345.154	-2.801	-6.2	24	3	5	5	8
ZINC000004411153	O=C1c2ccccc2C(=O)C2=C1[C@H]1C=CC=N[C@@H]1[C@](O)(S(=O)(=O)O)[C@@]2(O)S(=O)(=O)O	454.998	-0.846	-7.3	30	4	2	4	9
CHEMBL223007	NC(=O)OCC1=C(COC(=O)N)C(=O)c2c(O)ccc(O)c2C1=O	336.059	-0.036	-6.7	24	2	4	4	8
CHEMBL461748	O.NC(=O)c1nonc1CN2CCC(Cc3c[nH]cn3)CC2.OC(=O)C(=O)O	398.155	-1.323	-1.4	28	3	5	4	8
CHEMBL1541695	CCS(=O)(=O)O.CC1(C)N=C(N)N=C(N)N1c2cccc(CN)c2	356.163	0.225	-3.7	24	2	3	4	8
CHEMBL3339255	OC[C@H]1O[C@@H](Oc2ccc(cc2)C(=O)N\N=C\c3cccc(c3)C#N)[C@H](O)[C@@H](O)[C@@H]1O	427.138	-0.499	-8.1	31	3	6	5	9
CHEMBL1093839	OS(=O)(=O)c1ccccc1\C=N\NC(=O)C(=O)N\N=C\c2ccccc2S(=O)(=O)O	454.025	-0.22	-8.4	30	2	6	4	8
CHEMBL3143007	CCC1=CN([C@H]2C[C@H](O)[C@@H](COP(=O)(O)CC(=O)O)O2)C(=O)NC1=O	378.083	-0.966	-7.2	25	2	7	4	8
CHEMBL3800690	OC[C@H]1O[C@H](Oc2ccc(cc2)c3ccccc3)[C@@H](OCOP(=O)(O)O)[C@@H](O)[C@@H]1O	442.103	0.623	-8	30	3	8	5	8
CHEMBL593692	OC[C@H]1O[C@@H](NC(=O)c2cc(Br)c3OCCOc3c2)[C@H](O)[C@@H](O)[C@@H]1O	419.022	-1.25	-8.5	25	3	3	5	8
CHEMBL3275313	[Br-].CCC(C(CO)Cc1c[n+](C\C(=N/O)\c2ccc(cc2)[N+](=O)[O-])cn1C)C(=O)NO	499.107	-2.214	-0.9	31	2	10	4	8
ZINC000002818155	CC(C)(CO)NS(=O)(=O)c1ccc2c(c1)C(=NO)c1cc(S(=O)(=O)NC(C)(C)CO)ccc1-2	497.129	0.992	-7.8	33	3	8	5	8
ZINC000022035132	NC(=O)CN1CCCN(CC(N)=O)CCN(CC(N)=O)CCN(CC(N)=O)CC1	414.27	-4.461	-6.2	29	1	8	4	8
CHEMBL526843	CO[C@@H]1CC[C@](C)(O)C(=C1O)C(=O)C2(C)NC(=O)CC[C@H](N)C(=O)O2	356.158	-0.576	-7	25	2	3	4	8
CHEMBL389975	CCS(=O)(=O)NC\C(=N/OC)\[C@@H]1C[C@@H](CN1)SC2=C(N3[C@H]([C@H]2C)[C@@H]([C@@H](C)O)C3=O)C(=O)O	490.156	-0.454	-7.3	32	3	10	4	9
CHEMBL3504690	CN(Cc1cccc2cccnc12)C3CCS(=O)(=O)C3.OC(=O)CC(O)(CC(=O)O)C(=O)O	482.136	0.605	-5.8	33	3	8	4	8
ZINC000016889991	N=c1nc(N)nc(N)n1-c1ccc(S(=O)(=O)O)cc1	282.054	-0.842	-7.4	19	2	2	4	8
ZINC000065734318	Nc1nc(/C(=N/O)C(=O)NCC(O)O)cs1	246.042	-1.669	-6.2	16	1	4	5	8
ZINC000029338282	CC1=C(N)C(=O)c2c(COC(N)=O)c3n(c2C1=O)C[C@H](N)[C@@H]3O	320.112	-0.931	-6.8	23	3	2	4	8
ZINC000005178906	Nc1nc(NCO)nc(NCO)n1	186.087	-1.823	-5.7	13	1	4	5	8
CHEMBL1965180	COC1(CC(CO)(CNc2nc(N)nc(Cl)c2\C=N/O)C1)OC	345.12	0.694	-6.7	23	2	7	4	9
ZINC000001498437	Cn1c2nc(NN)n(CCO)c2c(=O)[nH]c1=O	240.097	-2.299	-6.6	17	2	3	4	8
ZINC000096602702	O=C1c2cccc(NCS(=O)(=O)O)c2C(=O)c2cccc(NCS(=O)(=O)O)c21	426.019	0.976	-7.7	28	3	6	4	8
CHEMBL1443992	COCCCNCC(=O)Nc1sc(C)c(C)c1C(=O)OC.OC(=O)C(=O)O	404.125	0.872	-3.9	27	1	8	4	8
ZINC000031460595	O=C(O)[C@H]1O[C@@H](O[C@H]2N=C(c3ccccc3)c3cc(Cl)ccc3NC2=O)[C@H](O)[C@@H](O)[C@@H]1O	462.083	0.364	-7.4	32	4	4	5	8
CHEMBL3703838	OC[C@H]1O[C@H]([C@H](O)[C@@H](O)[C@@H]1O)c2ccc(Cl)c(Cc3ccc4OCCS(=O)(=O)c4c3)c2	470.08	0.612	-9.1	31	4	4	4	8
CHEMBL3962209	NCCNC(=O)c1ccc(s1)c2cc(NC3CC3)n4ncc(\C=C\5/NC(=O)NC5=O)c4n2	452.138	0.901	-8.4	32	5	7	5	9
ZINC000101268500	N=C(N)NS(=O)(=O)c1ccc(NC=C2C(=O)OC3(CCCCC3)OC2=O)cc1	408.11	0.915	-9.8	28	3	4	4	8
CHEMBL1742458	CN1C(=NS(=O)(=O)N=C1NCCSCc2csc(N=C(N)N)n2)N	391.067	-1.268	-7.9	24	2	6	4	9
ZINC000020479496	Nc1nc(SCC(=O)NCCNc2ccc([N+](=O)[O-])cn2)n[nH]1	338.091	0.01	-7.6	23	2	8	4	9
CHEMBL3248251	CC(=O)C1=C(O)\C(=C(/C)\Nc2cccc(NC(=O)C(=O)C(=O)O)c2)\C(=O)OC1=O	402.07	0.449	-8.2	29	2	6	4	9
CHEMBL1093021	OC[C@H]1O[C@H]([C@H](O)[C@@H](O)[C@H]1O)n2cc(CCc3ccccc3)nn2	335.148	-0.964	-7.8	24	3	5	4	8
ZINC000022060520	CN(Cc1nc2c(N)nc(N)nc2nc1O)c1ccc(C(=O)O)cc1	341.124	0.624	-8	25	3	4	4	9
CHEMBL346133	CCOC(=O)Nc1cc2c(nc(S)n2N)c(N)n1	268.074	0.584	-6.3	18	2	2	4	8
CHEMBL3805395	COC(=O)[C@@H](NC(=O)CNc1nc(NC(=O)C)nc2[nH]cnc12)C(C)C	363.166	0.037	-8.3	26	2	7	4	8
ZINC000002199788	COc1cc(/C=N/NC(=N)c2nonc2N)cc(OC)c1O	306.108	0.324	-7.8	22	2	5	4	9
CHEMBL139419	C[C@@H](O)[C@@H]1[C@H]2[C@@H](C)C(=C(N2C1=O)C(=O)O)S[C@@H]3CN[C@@H](C3)C(=O)N4CC(C(=O)O)\C(=N\O)\C4	482.147	-1.023	-8.2	33	4	6	5	9
CHEMBL2070404	CSC[C@@H](C[NH2+]Cc1c[nH]c2c(N)ncnc12)[C@@H](O)CO.[O-]C(=O)C(F)(F)F	425.134	-1.765	-4	28	2	8	5	8
CHEMBL264637	ONC(=O)N\N=C\c1cc(cc(c1O)[N+](=O)[O-])[N+](=O)[O-]	285.035	0.231	-7.5	20	1	4	4	8
CHEMBL1999287	CC1=C(C#N)C(=S)N(C2OCC(O)C(O)C2O)C(=C1C#N)N	322.074	-0.537	-6.5	22	2	1	4	9
CHEMBL1205890	Clc1c(NC(=O)c2nnn[nH]2)cc(cc1NC(=O)c3nnn[nH]3)C#N	359.039	-0.258	-8.7	25	3	4	4	9
CHEMBL187252	CC(C)(C)C#Cc1nc(nc(n1)N(CCO)CCO)N(CCO)CCO	367.222	-1.149	-6.1	26	1	10	4	9
CHEMBL178393	CC1=C(SC2CCCCC2)N(COCNC(=O)CNCP(=O)(O)O)C(=O)NC1=O	450.134	0.042	-7.9	29	2	10	5	8
CHEMBL2000244	OCCNC1=C(N2CC2)C(=O)C(=C(N3CC3)C1=O)NCCO	308.148	-2.644	-5.4	22	3	8	4	8
ZINC000257316231	CC(=O)N1CCN(C(=O)[C@@H]2CS[C@@H]3[C@H](O)[C@@H](O)[C@H](O)[C@H](O)C(=O)N23)CC1	389.126	-3.596	-7.7	26	3	1	4	8
CHEMBL191119	CCc1cc(C(=O)C)c(O)cc1OCc2cccc(n2)C(=O)NC(CO)(CO)CO	418.174	0.577	-7.6	30	2	10	5	8
CHEMBL3342257	NS(=O)(=O)O[C@@H]1CCN(C1)S(=O)(=O)[C@@H]2O[C@H](CO)[C@@H](O)[C@H](O)[C@H]2O	392.056	-4.589	-7.7	24	2	5	5	10
ZINC000104229286	CNC(=O)[C@@H]1OCCOCCO[C@@H](C(=O)NC)[C@@H](C(=O)NC)OCCOCCO[C@H]1C(=O)NC	492.243	-3.442	-6.3	34	1	4	4	10
CHEMBL3247611	NCCCCCCS(=O)(=O)[C@H]1O[C@H](CO)[C@@H](O)[C@H](O)[C@@H]1O	327.135	-2.28	-6.4	21	1	8	5	8
CHEMBL1207388	O[C@H]1[C@H](O)[C@H]2[C@@H](NC(=O)c3c(O)c4OCOc4cc23)[C@@H]5OP(=O)(O)O[C@H]15	387.036	-1.064	-8	26	5	0	5	9
CHEMBL3288835	COC(=O)[C@@H](CO)NC1=C(C(=O)NCc2ccc(F)cc2F)C(=O)N(O)c3ncccc13	448.119	0.788	-8	32	3	7	4	9
CHEMBL3248252	CC(=O)C1=C(O)\C(=C(/C)\Nc2cccc(NC(=O)C(O)CO)c2)\C(=O)OC1=O	390.106	0.149	-7.8	28	2	6	5	9
CHEMBL202944	COc1ccc(cc1)S(=O)(=O)[C@@H]2O[C@H](CO)[C@H](O)[C@H](O)[C@H]2O	334.072	-1.731	-7.3	22	2	4	4	8
CHEMBL343132	C[C@@H](O)[C@@H]1[C@H]2[C@@H](C)C(=C(N2C1=O)C(=O)O)S[C@@H]3CN[C@@H](C3)C(=O)N4CC\C(=N\O)\C4	438.157	-0.334	-8.4	30	4	5	4	8
CHEMBL3642922	CC(Cc1oc(cc1)C(=O)Oc2ccc(cc2)C(=N)N)C(=O)N[C@@H](CS(=O)(=O)O)C(=O)O	467.1	0.419	-8.9	32	2	10	5	8
ZINC000002689496	Nc1ccc(S(=O)(=O)NC(=O)CCCCC(=O)NS(=O)(=O)c2ccc(N)cc2)cc1	454.098	0.721	-8.5	30	2	9	4	8
ZINC000004962534	OC[C@@H]1O[C@H](n2cc(Br)c3c2ncnc3NO)[C@H](O)[C@@H]1O	360.007	-0.394	-6.7	21	3	3	5	9
CHEMBL1165557	COc1cc(ccc1\C=C\2/CCCN=C2c3cccnc3)C(=O)[C@H]4O[C@@H](O)[C@H](O)[C@@H](O)[C@@H]4O	454.174	0.739	-8.9	33	4	5	4	9
ZINC000072408900	Nc1nc2c(c(N[C@@H]3CS(=O)(=O)C[C@H]3O)n1)CCNCC2	313.121	-1.683	-7.5	21	3	2	4	8
ZINC000104389788	CC(/C=N\NC1=NCCN1)=N/NC1=NCCN1	236.15	-1.554	-6.6	17	2	3	4	8
CHEMBL2207697	COCCNC1=CC(=O)c2c(O)c3[C@@H](O)C[C@@](C)(O)Cc3c(O)c2C1=O	363.132	0.327	-7.7	26	3	4	5	8
CHEMBL1192732	Cn1cc(NC(=O)c2cc(NC(=O)Cn3ccnc3[N+](=O)[O-])cn2C)cc1C(=O)NCCC(=N)N	484.193	0.415	-7.4	35	3	10	5	10
ZINC000038801837	O=C1[C@@H]2[C@H]3C=C[C@H](O3)[C@H]2C(=O)N1/N=C/[C@H](O)[C@H](O)[C@H](O)[C@H](O)CO	342.106	-3.653	-7.4	24	3	6	5	9
CHEMBL260605	CCCC[C@H]1CN(CCO)[C@@H]1C(=O)N[C@H]([C@H](C)Cl)[C@H]2O[C@H](SC)[C@H](O)[C@@H](O)[C@H]2O	454.19	-0.248	-6.4	29	2	10	5	8
CHEMBL1967455	Nc1nc(Cl)c(\C=N/O)c(NCC2(CO)CC(=O)C2)n1	299.079	0.274	-7.2	20	2	5	4	8
ZINC000005511759	Nn1cnnc1N/N=C/c1ccc(O)cc1O	234.087	-0.151	-7.3	17	2	3	4	8
CHEMBL3221805	O[C@@H]1C[C@@](O)(C=C([C@H]1O)c2cn(Cc3cccs3)nn2)C(=O)O	337.073	-0.288	-7.5	23	3	4	4	8
CHEMBL2028483	[Na+].OC(C(O)C(O)c1nc2ccccc2s1)C(O)C(=O)[O-]	321.028	-4.834	-7.9	21	2	5	4	8
CHEMBL591954	CCCc1nnc(Cc2cccc(c2)[C@@H]3O[C@H](CO)[C@@H](O)[C@H](O)[C@H]3O)s1	380.141	0.596	-8	26	3	6	4	8
CHEMBL483890	C[C@H](COC1=CC(N)N(O)C(=N1)N)OCP(=O)(O)O	296.089	-1.311	-6.8	19	1	6	5	8
CHEMBL608293	CC(C)CONC(=O)[C@H]1OC([C@H](O)[C@@H]1O)n2cnc3c(N)ncnc23	352.15	-1.268	-7.4	25	3	5	4	10
ZINC000952863778	CC(C)[C@H]1NC(=O)CCN=C2C=C(CCNC(=O)[C@H](C)NC1=O)N=C(N1CCSCC1)N2	463.237	-0.168	-8.9	32	3	1	4	8
ZINC000068604779	NCCN1CCCN(CCN)CCN(CCN)CCCN(CCN)CC1	372.369	-2.177	-4.7	26	1	8	4	8
ZINC000031829837	COC(=O)C1=C(C)N(NC(N)=O)C2(N)N(NC(N)=O)C(C)=C(C(=O)OC)C12C#N	408.151	-2.199	-6	29	2	4	5	10
CHEMBL3596416	OC[C@H]1O[C@H](OCCc2ccc(cc2)[N+](=O)[O-])[C@@H](O)[C@@H](O)[C@@H]1O	329.111	-1.046	-7.7	23	2	6	4	8
CHEMBL487616	CON1C(=O)[C@@H](O[C@@H]2O[C@H](CO)[C@@H](O)[C@H](O)[C@H]2O)Oc3cc(OC)ccc13	387.117	-1.875	-8.2	27	3	5	4	10
CHEMBL2007731	C1CNOCCCONCCCNOCCCONC1	292.211	-0.355	-6.4	20	1	0	4	8
ZINC000067967275	CC(C)c1nc(CNC(=O)c2ccc(NC(CO)CO)nc2)no1	335.159	0.283	-7.6	24	2	8	4	8
CHEMBL3527373	O[C@@H]1[C@@H](O)[C@H](Oc2ccc(cc2)[C@H]3CN4CCSC4=N3)O[C@@H]([C@H]1O)C(=O)O	396.099	-0.583	-8.2	27	4	4	4	9
CHEMBL3426103	CC(=O)N[C@@H]1[C@@H](N)[C@@H](F)[C@@](F)(O[C@H]1[C@H](O)[C@H](O)CO)C(=O)OCCCCC(F)(F)F	452.158	-0.789	-7.4	30	1	9	5	8
CHEMBL1079828	CS[C@@]12C[C@@H]3[C@@H]([C@@H](O)[C@@H](O)CC3=O)N1C(=O)[C@@]4(C[C@@H]5[C@@H]([C@@H](O)[C@@H](O)CC5=O)N4C2=O)SC	486.113	-2.058	-5.9	32	5	2	4	10
CHEMBL1957445	O[C@H]1[C@@H](O)[C@@H](O[C@@H]1CCP(=O)(O)O)N2C=C(C(=O)NC2=O)c3cc4ccccc4s3	454.06	0.605	-7.9	30	4	5	5	8
CHEMBL3339246	OC[C@H]1O[C@@H](Oc2ccc(cc2)C(=O)N\N=C\c3ccc(Cl)cc3)[C@H](O)[C@@H](O)[C@@H]1O	436.104	0.283	-8	30	3	6	5	8
CHEMBL2443315	NS(=O)(=O)c1ccc(Nc2nc(F)nc(NCCO)n2)cc1	328.075	-0.194	-7.5	22	2	6	4	8
ZINC000005734148	COc1cccc2c1C(=O)c1c(O)c3c(c(O)c1C2=O)C[C@@](O)(C(=O)CO)CC3	398.1	0.663	-7.6	29	4	3	4	8
CHEMBL3208162	Oc1ccccc1\C=N\NC(=O)CSc2nnc(O)nc2O	321.053	0.231	-8.5	22	2	5	4	9
CHEMBL1203977	Cl.NCCCC(N)(C(F)F)C(=O)OCCCNc1nc(N)nc(N)n1	384.16	-0.495	-6.7	25	1	10	5	10
CHEMBL1090111	CO[C@H]1OCC(C[C@H]1O)S[C@H]2O[C@H](CO)[C@@H](O)[C@H](O)[C@H]2NC(=O)C	367.13	-2.214	-6.8	24	2	5	5	9
ZINC000108248228	C/C(NCCNC(=O)c1nnc(N)[nH]1)=C1/C(=O)C=C(C)OC1=O	320.123	-0.99	-8	23	2	5	4	8
ZINC000009512131	CCNC(=O)NC(=O)[C@H](C)OC(=O)CNS(=O)(=O)c1ccc(NC)c([N+](=O)[O-])c1	431.111	-0.308	-7.7	29	1	9	4	9
CHEMBL112787	C[N+](C)(C)CC(Cn1cnc2c(N)nc(N)nc12)OCP(=O)(O)O	360.154	-0.783	-7.7	24	2	7	4	8
CHEMBL1277683	Cl.CS(=O)(=O)CC[C@H](N)C(=O)N[C@H](CO)[C@H](O)c1ccc(cc1)S(=O)(=O)C	444.079	-1.216	-7	27	1	9	4	8
ZINC000008826441	C=CCNC(=O)NC(=O)COC(=O)c1cc([N+](=O)[O-])ccc1NCCO	366.118	0.168	-7.7	26	1	9	4	8
CHEMBL1962731	NC(=N)NC(=O)c1nc(Cl)c(NCCS(=O)(=O)Cc2ccccc2)nc1N	411.088	0.362	-8.2	27	2	7	5	8
CHEMBL473950	COc1cccc(c1OC)c2nc(C(=O)N=C(N)N)c(C)[nH]2.CS(=O)(=O)O.CS(=O)(=O)O	495.109	-0.176	-3.4	32	2	4	5	8
CHEMBL1206867	C[C@@H](O)[C@@H]1[C@H]2[C@@H](C)C(=C(N2C1=O)C(=O)O)S[C@@H]3CCO[C@@H]3CNC(=O)[C@H](C)NC(=O)[C@H](C)N	484.199	-1.001	-7	33	3	9	5	8
CHEMBL283838	Nc1nc(O)c2nc(CCNC3CCC(CC3)C(=O)O)cnc2n1	332.16	0.483	-7.9	24	3	5	4	8
ZINC000100071299	CC1=C(N)C(=O)C2=C(C1=O)N1C[C@H](N)[C@H](O)[C@]1(O)[C@@H]2COC(N)=O	338.123	-2.957	-6.8	24	3	2	5	9
CHEMBL3189967	C[C@H](NC(=O)OC(C)(C)C)C(=O)N\N=C\c1c(C)nc(O)nc1O	339.154	0.56	-7.7	24	1	4	4	8
ZINC000016382819	Nc1nnc(/N=[N+](\[O-])c2n[nH]c(N)n2)[nH]1	210.073	-0.987	-6.9	15	2	2	4	8
CHEMBL3417106	CS(=O)(=O)c1ccc(cc1)c2ccc(O[C@H]3O[C@H](CO)[C@@H](O)[C@H](O)[C@@H]3O)cc2	410.104	-0.064	-7.8	28	3	5	4	8
CHEMBL41738	Nc1ncnc2c1ncn2NC(=O)COCP(=O)(O)O	302.053	-1.37	-7.3	20	2	5	4	8
CHEMBL85164	CN(C)C(=O)COC(=O)Cc1ccc(OC(=O)c2ccc(NC(=N)N)cc2)cc1.CS(=O)(=O)O	494.147	0.889	-3.3	34	2	7	4	8
CHEMBL218944	N[C@@H]1C[C@H](N)CN(C1)c2nc(Nc3ccccc3F)nc(n2)N4C[C@H](N)C[C@H](N)C4	416.256	-0.516	-8.2	30	4	4	5	10
ZINC000585286144	NC[C@@H]1O[C@H](C(=O)NCCc2cnccn2)[C@H](O)[C@H](O)[C@H]1O	312.143	-3.056	-7.8	22	2	5	5	8
ZINC000017285079	Nc1nc2[nH]c(/N=N\c3ccc(S(=O)(=O)O)cc3)nc2c(=O)[nH]1	335.044	0.89	-8.3	23	3	3	4	8
CHEMBL3209186	CC(Nc1nnc(O)nc1O)C(=O)N\N=C\c2cccs2	308.069	0.295	-7.9	21	2	5	4	9
ZINC000003844563	CCOC(=O)CNc1cc(NCC(=O)OCC)c(N)cc1N	310.164	0.801	-6.7	22	1	8	4	8
CHEMBL3403443	Nc1ncc(c(N[C@@H]2C[C@H](CO)[C@@H](O)[C@H]2O)n1)c3ccc4ccccc4n3	367.164	0.788	-8.2	27	4	4	5	8
CHEMBL1193540	NC1=NCN(C(=N1)N)c2cccc(\C=C\c3cccc(c3)N4CN=C(N)N=C4N)c2	402.203	0.671	-8.6	30	4	4	4	10
CHEMBL552354	COc1ccc(cc1)C2=NN\C(=N/N=C/C(O)C(O)C(O)CO)\C(=C2)Cc3ccccc3OC	468.201	0.646	-8.6	34	3	10	5	9
CHEMBL4105519	Nc1ncn(n1)C(=O)Nc2ccc(NC(=O)n3cnc(N)n3)cc2	328.114	0.194	-8.2	24	3	2	4	10
CHEMBL182002	O[C@@H]1COC2C1OCC23Nc4ccccc4[C@]5(Nc6ccccc6)C7OC[C@@H](O)C7OC35	438.179	0.844	-7	32	7	2	4	8
ZINC000104709580	N=c1n2c3ccccc3n1CC(O)Cn1c3ccccc3n(c1=N)CC(O)C2	378.18	0.594	-7.9	28	5	0	4	8
ZINC000005819397	Nc1ncn(C[C@H](O)CO)c2nc(S)nc1-2	241.063	-0.998	-5.8	16	2	3	4	8
CHEMBL3138483	[Na+].CC12CC(OS(=O)(=O)[O-])C(O)C(O)C1CCC3C2CCC4(C)C(C=C)C(O)C(O)C34	468.179	-2.436	-7.8	31	4	3	4	8
CHEMBL3544518	CC(C#N)c1cc(cc(c1)C(C)(C)C#N)C(=O)OC2O[C@@H]([C@@H](O)[C@H](O)[C@H]2O)C(=O)O	418.138	0.164	-8.2	30	2	5	4	9
CHEMBL3278671	Nc1nc(O)c2N=C(C(O)Nc2n1)C(=O)O	225.05	-1.335	-7	16	2	1	5	8
CHEMBL575221	CC1(C)CC(=O)C2=C(C1)N=C3NN=C([C@@H](O)[C@H](O)[C@H](O)CO)N3C2c4ccc(Cl)cc4	448.151	0.688	-7.3	31	4	5	5	9
CHEMBL384771	O[C@H]1[C@@H](O)[C@@H](O[C@@H]1COP(=O)(O)O)N2C=CC(=O)NC2=S	340.013	-1.366	-7.4	21	2	4	5	8
ZINC000010798404	CNC(=O)NC(=O)[C@H](C)Sc1nnc(S[C@@H](C)C(=O)NC(=O)NC)s1	406.055	0.41	-7.6	25	1	6	4	9
CHEMBL4065776	CCC(CO)Nc1nc(Cl)nc(NNC(=O)c2ccncc2)n1	337.105	0.86	-7.8	23	2	7	4	8
CHEMBL26012	CN(Cc1cnc2nc(N)nc(N)c2n1)c3ccc(cc3)C(=O)NCCCCS(=O)(=O)O	460.164	0.618	-8.4	32	3	9	4	10
ZINC000025664527	O=S(=O)(O)C[C@@H](O)COc1ccc(OC[C@H](O)CS(=O)(=O)O)cc1	386.034	-1.058	-7.8	24	1	10	4	8
ZINC000025576494	CCOC(=O)NC(=S)NN1CCN(NC(=S)NC(=O)OCC)CC1	378.114	-0.325	-6.4	24	1	4	4	8
CHEMBL61716	OCC(CO)OCn1cc(Br)c2c(NO)ncnc12	332.012	0.322	-6.2	19	2	6	4	8
CHEMBL477284	OC(=O)CNC(=O)CNC(=O)CNC(=O)c1cc(cc(c1)[N+](=O)[O-])[N+](=O)[O-]	383.071	-1.45	-8	27	1	9	4	8
ZINC000005350690	CC(C)(Oc1ccc(Cl)cc1)C(=O)O[C@@H]1O[C@H](C(=O)O)[C@@H](O)[C@H](O)[C@H]1O	390.072	-0.067	-8.1	26	2	5	4	8
CHEMBL1511369	OCCCNS(=O)(=O)c1ccc2c(OC(=O)c3cc(ccc23)S(=O)(=O)NCCCO)c1	470.082	0.268	-7.2	31	3	10	4	8
CHEMBL22050	NC(CO)(CO)CO.OC(=O)c1oc2c(cc(Cl)c3cccnc23)n1	369.073	0.388	-4.5	25	3	4	5	8
CHEMBL1938399	Nc1nc(Cl)c(C#CC2N=CC=N2)c(N[C@@H]3C[C@H](CO)[C@@H](O)[C@H]3O)n1	364.105	-0.941	-6.7	25	3	3	5	9
CHEMBL3303476	CC(NC(=O)c1ccc(cc1)N(C)Cc2cnc3nc(N)nc(N)c3n2)C(=O)O	396.166	0.424	-9	29	3	6	4	9
CHEMBL393820	CC(C)[C@H](N)C(=O)O[C@@H]1[C@@H](CO)O[C@@H](N2C=CC(=NC2=O)N)[C@]1(C)O	356.17	-1.639	-7	25	2	5	4	10
ZINC000040387438	CC(CO)(CO)N1CNC(=NS(=O)(=O)c2cccc3nsnc32)NC1	386.083	-1.111	-7.4	25	3	5	4	8
CHEMBL2159356	OC1O[C@H](COC\C=C\n2ccnc2[N+](=O)[O-])[C@@H](O)[C@H](O)[C@H]1O	331.102	-1.921	-7.4	23	2	6	4	10
CHEMBL3310895	OC[C@H]1O[C@@]2(S\C(=N/C(=O)c3ccc4ccccc4c3)\NC2=O)[C@H](O)[C@@H](O)[C@@H]1O	418.083	-0.631	-8.4	29	4	2	5	8
CHEMBL376259	N[C@@H]1C[C@H](N)CN(C1)c2nc(Nc3cccc(c3)C(F)(F)F)nc(n2)N4C[C@H](N)C[C@H](N)C4	466.253	0.363	-9	33	4	4	5	10
CHEMBL454100	CCN(CC)\[N+](=N\O[C@@H]1O[C@H](CO)[C@@H](O)[C@H](O)[C@H]1O)\[O-]	295.138	-2.063	-6.6	20	1	6	4	8
ZINC000308455711	Nc1nnc([C@H](O)[C@@H](O)[C@H](O)CO)s1	221.047	-2.132	-5.5	14	1	4	5	8
ZINC000100431565	CC(=O)[C@H](O)[C@H]1O[C@@H](n2cnc3c2ncnc3N)[C@@]2(O)C(C)(C)[C@@]12O	349.139	-1.242	-6.5	25	4	3	4	10
CHEMBL3544799	CC1(CCOC2O[C@@H]([C@@H](O)[C@H](O)[C@H]2O)C(=O)O)CC(=O)NC1=O	333.106	-2.662	-7.8	23	2	5	5	8
CHEMBL607594	NC(=O)c1ncn(n1)C2O[C@H](COS(=O)(=O)N)[C@@H](O)[C@H]2O	323.054	-3.784	-7.5	21	2	5	4	10
CHEMBL1652466	NC1=NC(=O)c2ncn(CCOCP(=O)(O)OP(=O)(O)O)c2N1	369.024	-1.029	-7.8	23	2	7	5	9
CHEMBL1962845	CCOP(=O)(CNc1nc(N)c(nc1Cl)C(=O)NC(=N)N)OCC	379.092	0.971	-7.3	24	1	8	5	9
ZINC000016682972	CCOC(=O)[C@@H](O)[C@H](O)[C@H](O)[C@@H](O)c1nnc2ccccc2n1	323.112	-1.296	-7.1	23	2	6	4	9
CHEMBL3248269	CC(=O)C1=C(O)\C(=C(/C)\Nc2ccc(O)c(NS(=O)(=O)C)c2)\C(=O)OC1=O	396.063	0.934	-7.8	27	2	5	4	9
CHEMBL95533	N\C(=C(\C#N)/C(=C(\N)/SCCO)/C#N)\SCCO	286.056	-0.175	-5.9	18	0	7	4	8
CHEMBL2159432	CC(C)c1[nH]nc(O[C@@H]2O[C@H](CO)[C@@H](O)[C@H](O)[C@H]2O)c1Cc3ccccc3C#N	403.174	0.174	-8	29	3	6	5	8
CHEMBL2303801	CS(=O)(=O)OC[C@]1(O)O[C@@H](CO)[C@@H](O)[C@H](O)[C@@H]1O	288.052	-3.875	-6.8	18	1	4	5	9
CHEMBL87643	COC1OC(CNC(=O)C(NC(=O)C)C(C)(C)SN=O)C(O)C(O)C1O	395.136	-1.745	-7.5	26	1	8	5	10
ZINC000033728453	CCOC(=O)C1=C(C)N=C(NN)N[C@H]1c1ccc(O)c(OC)c1	320.148	0.702	-6.6	23	2	4	4	8
CHEMBL3216187	Cl.Cl.CN(C1CN=C(NC(=O)N)NC1=O)C(=O)C[C@@H](N)c2cc(CN)on2	424.114	-1.652	-7.4	27	2	5	5	8
CHEMBL4102645	COCOCCOCC(=O)NC[C@@H]1N[C@H](CO)[C@H](O)[C@@H]1O	308.158	-3.206	-6.3	21	1	10	5	8
ZINC000005672483	CCOC(=O)/C(C(=N)NN)=C1\NN=C(c2ccc(OC)cc2)O1	319.128	0.192	-7.6	23	2	5	4	8
CHEMBL4077444	COc1ccc2C=C(NC(=O)[C@]34C[C@]5(O)[C@H](S3)C=C[C@@H](O)[C@@H]5ON4)C(=O)Oc2c1OC	448.094	0.516		31	5	4	4	10
ZINC000022357944	C[C@@]1(NC(=O)CNc2cc([N+](=O)[O-])ccc2NCCO)CCS(=O)(=O)C1	386.126	0.104	-7.4	26	2	8	4	8
ZINC000257291245	O=C(Nc1nccs1)[C@@H]1CS[C@@H]2[C@H](O)[C@@H](O)[C@H](O)[C@H](O)C(=O)N12	361.04	-2.191	-6.7	23	3	2	5	9
CHEMBL3642961	NC(=N)c1ccc(OC(=O)c2ccc(CCC(=O)N[C@@H](CS(=O)(=O)O)C(=O)O)s2)c(F)c1	487.052	0.78	-8.5	32	2	10	5	8
ZINC000016363260	COc1cc(C(c2c(O)nc(C)[nH]c2=O)c2c(O)nc(C)[nH]c2=O)ccc1O	386.123	0.776	-8.5	28	3	4	5	8
ZINC000003668962	O=C1NC(=S)NC(=O)C1C(c1cccc([N+](=O)[O-])c1)C1C(=O)NC(=S)NC1=O	421.015	-1.027	-7.7	28	3	4	4	8
CHEMBL3586147	OC[C@@H](NC(=O)CCNC(=O)c1nc[nH]n1)[C@H](O)c2ccc(cc2)[N+](=O)[O-]	378.129	-0.956	-7.7	27	2	9	5	8
CHEMBL1962613	COC(=O)CNc1nc(N)c(nc1Cl)C(=O)NC(=N)N	301.069	-1.08	-7.3	20	1	4	5	8
CHEMBL3596443	C[C@H](NC(=O)OCc1ccccc1)C(=O)N[C@@H](COC(=O)CNC(=O)OC(C)(C)C)C(=O)O	467.19	0.939	-7.6	33	1	10	4	8
ZINC000017005388	N=C(N)SC[C@@H]1OCO[C@@H]1[C@@H]1OCO[C@@H]1CSC(=N)N	322.077	-0.277	-6.2	20	2	5	4	8
ZINC000077311437	CCCCOC(=O)c1ccccc1C(=O)O[C@@H]1O[C@H](C(=O)O)[C@@H](O)[C@H](O)[C@H]1O	398.121	-0.308	-7.4	28	2	7	4	9
CHEMBL416469	CO[C@]12C3NC3CN1C4=C(C2COC(=O)N)C(=O)C(=C(C)C4=O)NC(C)C(=O)O	406.149	-1.547	-6.4	29	4	6	4	9
CHEMBL608033	CCCCC#Cc1nc(N)c2ncn(C3O[C@H](C\N=C(/S)\NC)[C@@H](O)[C@H]3O)c2n1	419.174	0.075	-6.9	29	3	5	5	9
ZINC000031291573	Cc1cc(CC(=O)O[C@@H]2O[C@H](C(=O)O)[C@@H](O)[C@H](O)[C@H]2O)n(C)c1C(=O)c1ccc(Cl)cc1	467.098	0.196	-8.2	32	3	6	4	9
CHEMBL3633193	NC(=O)CNc1ncnc(Nc2ccc(cc2)C(=N)N)c1[N+](=O)[O-]	330.119	0.31	-7.7	24	2	7	5	8
CHEMBL3674540	NC(=O)NNC(=N)c1cnc2nnn(Cc3ccc4ncccc4c3)c2n1	362.135	0.316	-9	27	4	3	4	8
CHEMBL2074703	OS(=O)(=O)CC(S)CSSCC(S)S(=O)(=O)O	359.896	0.698	-5.4	17	0	8	4	8
CHEMBL1200407	Cl.CN[C@@H]1[C@H](O)[C@H](NC)[C@H]2O[C@]3(O)[C@@H](O[C@H](C)CC3=O)O[C@@H]2[C@H]1O	368.135	-2.504	-7.2	24	3	2	5	9
CHEMBL48494	NC1C(O)C(O)C(O)OC1OCc2ccc3C(=O)c4ccccc4C(=O)c3c2	385.116	-0.298	-9.6	28	4	3	4	8
CHEMBL1254519	OC[C@@H](O)[C@@H]1O[C@@H](Sc2ccc(cc2)[N+](=O)[O-])[C@H](O)[C@H]1O	317.057	-0.513	-7.3	21	2	5	4	8
CHEMBL1161225	ONC1=NC(=O)N(C=C1I)[C@H]2C[C@H](O)[C@@H](COP(=O)(O)O)O2	448.948	-0.593	-7.7	22	2	5	5	9
ZINC000095913658	COC(=O)CCc1ccc(OC)cc1O[C@@H]1O[C@H](CO)[C@@H](O)[C@H](O)[C@H]1O	372.142	-1.02	-7.1	26	2	7	4	9
ZINC000001748569	O=c1[nH]nc(SCc2ccccc2CSc2n[nH]c(=O)[nH]c2=O)c(=O)[nH]1	392.036	-0.186	-9.2	26	3	6	4	8
CHEMBL3808826	OCC(CO)(CO)Nc1nnc2nncn2n1	241.092	-2.958	-6.8	17	2	5	4	10
CHEMBL3913373	Oc1ccc(NC(=O)NNC(=O)C2C(=O)NC(=O)N(C2=O)c3ccccc3)cc1[N+](=O)[O-]	442.087	0.352	-9.1	32	3	4	5	8
CHEMBL3302354	Cn1cc(NC(=O)c2cc(NC(=O)c3cc(cn3C)[N+](=O)[O-])cn2C)cc1C(=O)NCC(=N)N	469.182	0.781	-7.8	34	3	8	5	9
CHEMBL3392183	[Br-].C[S+](C[C@@H]1O[C@@H]([C@@H](O)[C@H]1O)n2cnc3c(N)ncnc23)C4CC(ON)C=C4	474.068	-4.133	-0.9	28	4	5	4	10
CHEMBL64562	CCCSC[S+]([O-])C[C@H](CO)NC(=O)\C=C\c1c(C)nc(O)nc1O	389.108	0.536	-7	25	1	10	4	8
CHEMBL3140289	OC[C@H]1O[C@@H](S\C(=N/OS(=O)(=O)O)\c2ccc(Br)cc2)[C@H](O)[C@@H](O)[C@@H]1O	472.945	-0.537	-8.1	26	2	5	5	10
CHEMBL2006192	CC(=S)NC1C(O)C(O)C(CO)OC1Oc2ccc3C(=CC(=O)Oc3c2)C	395.104	0.225	-7.1	27	3	4	4	8
ZINC000016545179	NC(=O)C(Sc1nc2ccccc2nc1SC(C(N)=O)C(N)=O)C(N)=O	394.052	-1.508	-7.4	26	2	8	4	8
CHEMBL1794939	CN1CCC2(CC1)C\C(=N\OC(=O)C)\CO2.OC(=O)\C=C/C(=O)O.OC(=O)C(=O)O	432.138	-0.342	-3.8	30	2	3	4	9
CHEMBL543371	Br.CN(C1CN=C(Nc2nc(C)cs2)NC1=O)C(=O)C[C@@H](N)CCCCN	461.121	0.601	-7.4	27	2	8	4	8
CHEMBL1092803	Nc1nc(S[C@@H]2O[C@H](O)[C@@H](O)[C@H](O)[C@H]2O)c(C#N)c(c3ccc(Br)cc3)c1C#N	477.995	0.686	-8.3	29	3	3	5	10
CHEMBL97789	CN(C)c1ncnc2c1ncn2CC#CCCOC(=O)N[C@@H](CCCNC(=N)N)C(=O)O	445.219	-0.272	-7.2	32	2	10	5	9
ZINC001560404559	O=C(N=c1ccn([C]2O[C@H](CO)C(O)=C2O)c(O)n1)c1ccccc1	344.088	0.386	-8.4	25	3	3	4	8
ZINC000005732469	CCS(=O)(=O)C([C@H](O)[C@@H](O)[C@H](O)[C@H](O)CO)S(=O)(=O)CC	350.071	-3.382	-5.7	21	0	9	5	9
ZINC000003668393	Nc1nc(SCSc2n[nH]c(N)n2)n[nH]1	244.031	-0.071	-6.5	15	2	4	4	8
CHEMBL3953393	NS(=O)(=O)OC[C@@H]1C[C@H](C[C@@H]1O)Nc2ncnc(N[C@@H]3c4ccccc4CC3(F)F)n2	456.139	0.988	-8.5	31	4	7	4	9
CHEMBL2385609	[NH4+].[NH4+].NC1=NC(=O)N(C=C1)[C@@H]2O[C@H](\C=C\P(=O)([O-])[O-])[C@@H](O)[C@H]2F	355.106	-1.398	-1.2	23	2	3	4	9
CHEMBL1171651	CS(=O)(=O)Nc1cccc(c1)c2ccc(O[C@H]3O[C@H](CO)[C@@H](O)[C@H](O)[C@@H]3O)cc2	425.114	-0.096	-8.5	29	3	6	5	8
CHEMBL2018045	Nc1nc(Cl)c(c(N[C@@H]2C[C@H](CO)[C@@H](O)[C@H]2O)n1)c3ccccn3	351.11	0.289	-7.4	24	3	4	5	8
CHEMBL1835205	NS(=O)(=O)c1ccc(cc1)c2cnnn2[C@@H]3OC[C@@H](O)[C@@H](O)[C@@H]3O	356.079	-1.796	-7.7	24	3	3	4	9
CHEMBL1990908	C\C(=N/N=C(N)N)\c1sc(nc1C)c2nc(C)c(s2)\C(=N\N=C(N)N)\C	392.131	0.878	-7.5	26	2	5	4	8
CHEMBL562609	NC(=N)NCCNC1=NC(=O)N(Cc2ccc(F)cc2)C(=O)N1Cc3ccc(cc3)[N+](=O)[O-]	456.167	0.444	-8.7	33	3	9	4	9
CHEMBL471024	NCCCC(N)(C(F)F)C(=O)OCCCNc1nc(N)nc(N)n1	348.183	-0.917	-6.8	24	1	10	5	10
CHEMBL3342636	O[C@H]1CC(=O)[C@]2(O)C(=C[C@H](O)[C@@H](O)C23Oc4cccc5cccc(O3)c45)[C@H]1O	386.1	-0.605	-7.6	28	5	0	5	8
CHEMBL1201892	Cl.COC1C(N)Cn2c1c(COC(=N)O)c3C(=O)C(=C(C)C(=O)c23)N	370.104	0.559	-6.2	25	3	3	4	8
CHEMBL1976265	OCC1OC(C(O)C(F)C1O)N2N=CC(=O)NC2=O	277.071	-3.119	-7.4	19	2	2	4	8
CHEMBL2018050	Nc1nc(Cl)c(c(N[C@@H]2C[C@H](CO)[C@@H](O)[C@H]2O)n1)c3nccs3	357.066	0.35	-7	23	3	4	5	9
CHEMBL3343912	CC(C)[C@H]1C[C@H]2O[C@@]2(C)[C@@H](O)[C@H]1O[C@@H]3O[C@H](CO)[C@@H](O)[C@H](O)[C@H]3O	348.178	-1.634	-6.4	24	3	4	5	8
CHEMBL4086367	CC(C)(NS(=O)(=O)C)[C@H](NC(=O)c1ccc(cc1)c2oc3ncncc3c2)C(=O)NO	447.121	0.821	-8.3	31	3	7	4	8
CHEMBL3198889	OC(C(O)C(=O)N\N=C\c1occc1)C(=O)N\N=C\c2occc2	334.091	-0.805	-7.4	24	2	7	4	8
CHEMBL28224	NC1=NC(=O)N(C=C1)C2SC(O)C(O)C2O	245.047	-1.889	-7.1	16	2	1	4	8
CHEMBL307486	Nc1nc(N)c2nc(CCc3ccc(cc3)C(=O)NC(CC(=C)C(=O)O)C(=O)O)cnc2n1	451.16	0.583	-8.9	33	3	9	5	9
CHEMBL3248258	CC(=O)C1=C(O)\C(=C(/C)\Nc2cccc(c2)C(=O)NC3C(=O)NC(=O)NC3=O)\C(=O)OC1=O	456.092	-0.679	-9.5	33	3	5	5	10
CHEMBL2000566	Oc1ccc(cc1)C(C2C(=O)NC(=S)NC2=O)C3C(=O)NC(=S)NC3=O.c4ccncc4	471.067	-0.148	-3.7	32	4	3	5	8
CHEMBL3144035	CCOP(=O)(O)OC[C@H]1O[C@H]([C@H](O)[C@@H]1O)C2=NNC(C(=O)N)C2=O	367.078	-2.989	-7.9	24	2	7	5	10
ZINC000059490004	CN(C)S(=O)(=O)c1cc([N+](=O)[O-])ccc1NNC=C1C(=O)NC(=O)NC1=O	398.064	-0.988	-8.9	27	2	6	4	9
CHEMBL3230021	CC(=O)C1=C(O)\C(=C(/O)\Nc2ccccc2N)\C(=O)OC1=O	304.07	0.935	-7.6	22	2	3	4	8
ZINC000001882405	NNc1nc(NN)nc(N2CCOCC2)n1	226.129	-1.721	-6.9	16	2	3	4	9
ZINC000006599469	OC[C@@H](O)Cn1cnc2c1ncnc2NO	225.086	-1.019	-6.3	16	2	4	4	8
CHEMBL1183718	CN(C1CN=C(NC(=O)N)NC1=O)C(=O)C[C@@H](N)c2csc(CCN)n2	382.154	-1.985	-7.3	26	2	6	5	8
CHEMBL3415959	NC1=Nc2ncc(CNc3ccc(cc3)C(=O)NO)nc2C(=O)N1	327.108	0.026	-8.4	24	3	4	5	8
ZINC000017721961	C[C@H](O)C(=O)C1=NC2=C(O)N=C(N)NC2=NC1	237.086	-1.566	-7	17	2	2	4	8
CHEMBL1989578	COc1ccc(cc1)C2C(=C(S)N(C3OC(CO)C(O)C(O)C3O)C(=C2C(=O)C)C)C#N	462.146	0.422	-6.3	32	3	5	5	10
CHEMBL1794938	CCC(=O)O\N=C\1/COC2(CCN(C)CC2)C1.OC(=O)\C=C/C(=O)O.OC(=O)C(=O)O	446.154	0.048	-3.8	31	2	4	4	9
ZINC001569975876	CN1CCN2c3ccc(O[C@@H]4O[C@H](C(=O)O)[C@@H](O)[C@H](O)[C@H]4O)cc3Cc3ccccc3[C@@H]2C1	456.19	0.355	-8.5	33	5	3	4	8
CHEMBL339987	OC(=O)C[C@H](NC(=O)OCC=C)C(=O)COC(=O)c1c(O)cccc1O	367.09	0.579	-7.2	26	1	9	4	8
CHEMBL2010347	OP(=O)(O)OCN1C(=O)C2C3C=CC(C4C3C5C4C(=O)N(COP(=O)(O)O)C5=O)C2C1=O	492.033	-1.616	-8.3	32	6	6	4	8
ZINC000016949218	CCOC(=O)c1ccc(N/N=C2/C(=N)NN(S(C)(=O)=O)C2=N)cc1	352.095	0.366	-8	24	2	5	4	8
CHEMBL4063704	COc1cc(OC)c(cc1OC)C(=O)NC[C@@H]2N[C@H](CO)[C@H](O)[C@@H]2O	356.158	-1.503	-6.9	25	2	7	5	8
ZINC000015721753	C[C@H](NC(=O)OC(C)(C)C)C(=O)N[C@@H](C)C(=O)N[C@@H](CC(=O)O)C(=O)Nc1ccc([N+](=O)[O-])cc1	495.197	0.911	-8.3	35	1	10	5	8
CHEMBL1835411	Cl.N[C@@H](CO)C(=O)N1CC2(C[C@H]1C(=O)NCCCCCC(=O)NO)SCCS2	456.127	-0.313	-7.2	28	2	9	5	8
CHEMBL1965790	O\N=C/1\C(\S\C(\C(\S1)=N\O)=N/O)=N\O	235.967	0.617	-5.7	14	1	0	4	10
CHEMBL3229964	CC(=O)C1=C(O)\C(=C(/O)\Nc2ccc(O)c(NS(=O)(=O)C)c2)\C(=O)OC1=O	398.042	0.43	-8.5	27	2	5	5	10
CHEMBL2323133	CNC1=NS(=O)N=C1NCCSCc2oc(CN(C)C)cc2.OC(=O)C(=O)O	433.109	-0.072	-3.7	28	2	7	4	8
ZINC000002315605	O=C(NCCNC(=O)c1ccc(O)nn1)c1ccc(O)nn1	304.092	-1.162	-8.8	22	2	5	4	8
CHEMBL1206766	C[C@]1(COC(=O)Cc2ccc(O)c(O)c2)[C@@H](N3C(\C(=C/C(=O)O)\C3=O)S1(=O)=O)C(=O)O	455.052	-0.997	-8.3	31	3	6	4	9
CHEMBL25742	CN(Cc1cnc2nc(N)nc(N)c2n1)c3ccc(cc3)C(=O)NCCCP(=O)(O)O	446.158	0.518	-8.6	31	3	8	5	9
CHEMBL3805838	COC(=O)C[C@H](NC(=O)CNc1nc(NC(=O)C)nc2[nH]cnc12)C(=O)OC	393.14	-1.056	-7.5	28	2	8	4	10
CHEMBL1903410	OC[C@H]1O[C@H]([C@H](O)[C@@H](O)[C@H]1O)c2nc(cs2)C(=O)NCC(F)(F)F	372.06	-1.05	-6.8	24	2	4	5	8
CHEMBL1794940	CC1OC2(CCN(C)CC2)C3OCCOC13.OC(=O)\C=C/C(=O)O.OC(=O)C(=O)O	433.158	-0.479	-3.7	30	3	2	4	8
CHEMBL426795	CC\C=C\CC1C(CC(=O)OC2C(O)C(O)C(O)C(O)C2O)CCC1=O	372.178	-0.942	-7.7	26	2	6	5	8
CHEMBL3545940	O[C@@H](COC(=O)C1CCCNC1)[C@H]2OC(=O)C(=C2O)O	287.101	-0.857	-7.3	20	2	4	4	8
CHEMBL608761	CCNC(=O)[C@H]1OC([C@H](O)[C@@H]1O)n2cnc3c(N)[n+]([O-])cnc23	324.118	-2.598	-7.7	23	3	3	4	9
CHEMBL1981450	C\C(=N/Nc1nnc(S)n1N)\C2=C(O)C=C(C)OC2=O	296.069	0.084	-7.6	20	2	3	4	10
CHEMBL2036389	Nc1nc(NC2CCCC2)c3ncn(\C=C/4\CC4(CO)CO)c3n1	330.18	0.979	-7.6	24	4	5	4	8
CHEMBL151587	C[C@H](O)[C@H]1O[C@@H](Oc2ccc(\C=C(/C)\C(=O)N3CCNCC3)cc2O)[C@@H](O)[C@@H]1O	408.19	-0.566	-8.2	29	3	5	5	8
ZINC000016546176	NC(=O)C(Sc1ncnn1C(C(N)=O)C(N)=O)C(N)=O	301.059	-3.779	-7.3	20	1	7	4	8
CHEMBL1889453	COc1ccc(OC)c(NC(=O)Nc2nnc(s2)[C@@H]3O[C@H](CO)[C@@H](O)[C@H]3O)c1	412.105	0.353	-7.9	28	3	6	5	10
CHEMBL1802111	Cl.CC(=O)c1c(C)onc1c2nc(c[nH]2)[C@@H](O)[C@H](O)[C@H](O)CO	347.088	-0.255	-7.4	23	2	6	5	8
CHEMBL1965769	CC(=O)NNc1nc(C)c(s1)C(=O)NNC(=O)C(=O)Nc2ccc(Cl)c(c2)[N+](=O)[O-]	455.041	0.876	-8.2	30	2	5	5	9
CHEMBL42734	Nc1nc(NCC(O)CO)c(Cl)nc1[N+](=O)[O-]	263.042	-0.615	-6.1	17	1	5	4	8
ZINC000827847787	Cc1nc(C)c(CC(=O)NCCc2nc(N)cc(O)n2)c(O)n1	318.144	-0.222	-7.8	23	2	5	4	8
CHEMBL512334	Nc1nc(N)nc(NCCCC(N)(C(F)F)C(=O)O)n1	291.126	-0.725	-6.7	20	1	7	5	8
CHEMBL34770	NS(=O)(=O)c1nnc(NC(=O)CNCC(=O)O)s1	295.005	-2.202	-6.5	18	1	6	4	8
ZINC000008375242	Cc1nnc(N/N=C/c2cc(Br)c(O)cc2O)n1N	326.013	0.92	-7.6	19	2	3	4	8
CHEMBL37605	NC(=O)C1OC(Sc2[nH]cnc3ncnc23)C(O)C(O)C1O	327.064	-2.31	-8	22	3	3	5	9
CHEMBL134550	C[C@@H](O)[C@@H]1[C@H]2SC(=C(N2C1=O)C(=O)O)CN3C[C@@H](CC3C(=O)N)OC(=O)N	400.105	-1.782	-7.6	27	3	6	4	8
CHEMBL543311	Cl.Cn1cc(NC(=O)Cn2ccnc2[N+](=O)[O-])cc1C(=O)NCCC(=N)N	398.122	0.246	-8.2	27	2	8	4	8
ZINC000084559543	CC1=C(O)C(=O)C(C2=C(O)C(=O)C(C)=C(O)C2=O)=C(O)C1=O	306.038	0.578	-7.7	22	2	1	4	8
CHEMBL3221801	O[C@@H]1C[C@@](O)(C=C([C@H]1O)c2cn(nn2)c3cccc(c3)C(=O)O)C(=O)O	361.091	-0.71	-8.9	26	3	4	5	8
CHEMBL1632638	COc1ccc(cc1)S(=O)(=O)N(C[C@H](O)CO)[C@H](CO)C(=O)NO	364.094	-2.095	-7.1	24	1	9	5	8
CHEMBL1985758	Br.C1CNOCCCONCCCNOCCCONC1	372.137	0.223	6.8	21	1	0	4	8
CHEMBL3221802	O[C@@H]1C[C@@](O)(C=C([C@H]1O)c2cn(nn2)c3ccccc3O)C(=O)O	333.096	-0.703	-8.1	24	3	3	5	8
ZINC000408721051	O=C1NC(=O)C(=NN=c2[nH]c3nonc3[nH]c2=Nc2ccc(Br)cc2)C(=O)N1	444.988	-0.503	-8.7	28	4	2	4	9
CHEMBL364754	Nc1nc(N)nc(NCCc2ccc(cc2)S(=O)(=O)N)n1	309.101	-0.662	-7.7	21	2	5	4	8
CHEMBL315889	Nc1nc(O)c2ncn(C[C@H](CCN=[N+]=[N-])OCP(=O)(O)O)c2n1	358.09	0.335	-7.4	24	2	8	4	9
CHEMBL2098335	CN1CCCN(CC1)c2cc(C)nc(Nc3cc(F)cc(F)c3)n2.OC(C(O)C(=O)O)C(=O)O	483.193	0.826	-5.2	34	3	6	5	9
ZINC000005758200	NNc1ncc([N+](=O)[O-])c(NN)n1	185.066	-1.044	-6.6	13	1	3	4	8
ZINC000031959644	COC(=O)[C@H](CCC/N=C(\N)N[N+](=O)[O-])NC(=O)c1ccc2c(c1O)C(=O)c1ccccc1C2=O	483.139	0.315	-7.8	35	3	8	4	9
ZINC000301054517	CC(=NN1CN([C@@H](C)C(=O)O)P(N(CCO)CCO)NC1=N)c1cccs1	416.14	0.558	-6.3	27	2	9	5	8
CHEMBL1951753	COC(=O)CNCC(=O)Nc1cccc2C(=O)c3cccc(NC(=O)CNCC(=O)OC)c3C(=O)c12	496.159	-0.136	-7.9	36	3	10	4	10
CHEMBL3230009	CC(=O)NCc1cccc(N\C(=C\2/C(=O)OC(=O)C(=C2O)C(=O)C)\O)c1	360.096	0.989	-7.8	26	2	5	4	8
ZINC000257229857	CN[C@@H]1CCC[C@@H](n2cnc3c2nc(N)nc3N)[C@@H]1O	277.165	-0.335	-8	20	3	2	4	8
ZINC000005853888	CCNc1nc(NC(C)C)nc(SC[C@H](NC(C)=O)C(=O)O)n1	342.147	0.805	-6.9	23	1	9	4	8
CHEMBL3558252	CO[C@@H]1O[C@H](CO)[C@H](O)[C@H](OCCOP(=O)(C)O)[C@H]1O	316.092	-1.711	-6	20	1	7	4	8
CHEMBL1794937	CN1CCC2(CC1)C\C(=N/OC(=O)c3ccccc3)\CO2.OC(=O)\C=C/C(=O)O.OC(=O)C(=O)O	494.154	0.952	-3.8	35	3	4	4	9
ZINC000199197855	N[C@@H](Cc1ccccc1)C(=O)OCC(=O)[C@@H](O)[C@H](O)[C@H](O)CO	327.132	-2.256	-6.9	23	1	9	5	8
CHEMBL1934409	NC1=Nc2c(ncn2CC(COCP(=O)(O)O)OCC(=O)O)C(=O)N1	377.074	-1.677	-7	25	2	9	5	9
ZINC000223144780	Cc1cc(=O)[nH]c(S[C@@H](C)C(=O)NCCc2nc(N)cc(O)n2)n1	350.116	-0.004	-7.9	24	2	6	4	8
CHEMBL1977711	CCC1=C(C)N(C2OC(CO)C(O)C(O)C2O)C(=S)C(=C1C)C#N	354.125	0.241	-5.4	24	2	3	4	8
CHEMBL3753708	CO[C@H]1O[C@H](Cc2nnn[nH]2)[C@@H](O)[C@H](O)[C@@H]1O	246.096	-2.804	-7	17	2	3	4	8
CHEMBL2348400	OC[C@H]1O[C@@H](Oc2cccc3OC(=O)Nc23)[C@H](O)[C@@H](O)[C@@H]1O	313.08	-1.7	-8	22	3	3	5	8
CHEMBL2398599	CC(=O)c1cnc(N[C@H]2O[C@H](CO)[C@@H](O)[C@H](O)[C@@H]2O)s1	304.073	-1.443	-7	20	2	4	5	9
ZINC000002028996	CC1(C)CC(=O)C(=CC(=C(NCCO)NCCO)[N+](=O)[O-])C(=O)C1	341.159	-0.519	-7.5	24	1	8	4	8
ZINC000020508399	Nn1c(SC/C(O)=N/c2ncn[nH]2)nnc1-c1ccccc1O	332.08	0.863	-8.3	23	3	5	4	9
ZINC000101152015	C/C(NCCNC(=O)c1nnc(N)[nH]1)=C1/C(=O)NC(=O)SC1=O	339.075	-1.51	-8.1	23	2	5	5	9
CHEMBL544260	Cl.Cl.CC1(C)N=C(N)N=C(N)N1c2ccc(cc2)N3C(=NC(=NC3(C)C)N)N	428.172	0.901	-7.2	28	3	2	4	10
CHEMBL3959717	O=C1NC(=O)\C(=C\c2cnn3c(NC4CC4)nc(NC5CCNC5)nc23)\N1	369.166	-0.347	-8.4	27	5	5	5	9
CHEMBL3392251	CC(C)NC(=O)Nc1ccnc(n1)c2cc[n+]([O-])cc2.CS(=O)(=O)O.CS(=O)(=O)O	465.099	0.315	-3.5	30	2	3	4	8
CHEMBL78681	CN(Cc1nn[nH]n1)NC(=O)C[C@H](N)C[C@@H](O)CN	272.171	-2.91	-6.4	19	1	8	5	8
CHEMBL327578	ONC(=O)[C@H]1[C@@H](O)[C@H](O)[C@@H](O)CN1S(=O)(=O)c2ccc(OC3CCCCC3)cc2	430.141	-0.641	-8.1	29	3	5	5	8
CHEMBL3199110	COc1cccc(\C=N\NC(=O)C(=O)N\N=C\c2cccc(OC)c2O)c1O	386.123	0.715	-7.5	28	2	6	4	8
ZINC000005349371	NC(=O)C[C@@H](NC(=O)CCCCSc1nc(N)nc2[nH]cnc21)C(=O)O	381.122	-0.358	-7.6	26	2	10	5	8
CHEMBL1978231	NN1C(=O)C(CCO)S/C/1=N/N=C\2/SC(CCO)C(=O)N2N	348.067	-1.986	-6.7	22	2	5	4	10
CHEMBL3248282	C\C(=C\1/C(=C(C(=O)C)C(=O)OC1=O)O)\Nc2cc(O)c(O)c(O)c2	335.064	0.974	-8	24	2	3	5	9
ZINC000003846907	Nc1ccc(O)c2c1C(=O)c1c(O)c(S(=O)(=O)O)cc(N)c1C2=O	350.021	0.284	-7.6	24	3	1	5	8
ZINC000005604648	OC1=c2ccccc2=C(O)C12N=Nc1n[nH]c(=S)n1N2	288.043	0.324	-7.9	20	4	0	4	8
ZINC000575598468	O=C(O)[C@H]1O[C@@H](Oc2cc3oc(O)nc3cc2Cl)[C@H](O)[C@@H](O)[C@@H]1O	361.02	-0.542	-8.2	24	3	3	5	9
CHEMBL2107142	Cn1cccc1C(=O)C(C#N)C(=O)Nc2ccccc2.NC(CO)(CO)CO	388.175	-0.353	-7.6	28	2	7	5	8
ZINC000252642531	CON[C@]1(C(C)=NN)NC(N)=NN=C1C	213.134	-1.538	-6.6	15	1	3	4	8
CHEMBL229658	O[C@H]1[C@H](O)[C@@H](N=[N+]=[N-])[C@@H](O[C@@H]2[C@@H](O)[C@H](O)[C@H](C[C@H]2N=[N+]=[N-])N=[N+]=[N-])O[C@@H]1CN=[N+]=[N-]	426.147	0.291	-7.7	30	2	7	4	10
CHEMBL343915	C[C@H](O)[C@H](C)[C@@H]1O[C@H]1C[C@H]2CO[C@@H](C\C(=C\c3oc(CO)cn3)\C)[C@H](O)[C@@H]2O	397.21	0.871	-6.9	28	3	8	4	8
CHEMBL1159475	OC[C@H]1OC(Oc2ccc(cc2)C3(N=N3)C(F)(F)F)[C@H](O)[C@@H](O)[C@@H]1O	364.088	0.046	-8	25	3	4	4	8
CHEMBL3941273	CNC(=O)c1cccc(CNc2nc(NC3CC3)n4ncc(\C=C\5/NC(=O)NC5=O)c4n2)c1	447.177	0.851	-9.6	33	5	7	5	9
CHEMBL1204624	O[C@H]1C[C@H]2[C@@H](NC(=O)c3c(O)c4OCOc4cc23)[C@@H]5OP(=O)(O)O[C@H]15	371.041	-0.035	-7.6	25	5	0	4	8
ZINC000006015772	Nc1nc(SCC(=O)CSc2n[nH]c(N)n2)n[nH]1	286.042	-0.459	-6.8	18	2	6	4	9
CHEMBL596460	CNc1ncnc2c1ncn2[C@@H]3S[C@@H]([C@@H](O)[C@H]3O)C(=O)NC4CC4	350.116	-0.518	-6.6	24	4	4	4	9
CHEMBL1933484	OC[C@H]1O[C@@H](Cc2cn(Cc3ccccc3Cl)nn2)[C@H](O)[C@@H](O)[C@@H]1O	369.109	-0.635	-8	25	3	5	4	8
CHEMBL3357843	OC[C@H]1O[C@@H](S[C@H]2CC(=O)[C@@H]3OC[C@H]2O3)[C@H](O)[C@@H](O)[C@@H]1O	322.072	-2.398	-7.5	21	3	3	4	9
CHEMBL1192014	C\C(=N/NC1=NCCN1)\c2cccc(c2)\C(=N\NC3=NCCN3)\C	326.197	0.232	-8.2	24	3	4	4	8
ZINC000004043675	O=[N+]([O-])c1ccc(NC(CO)(CO)CO)c([N+](=O)[O-])c1	287.075	-0.369	-6.8	20	1	7	4	8
CHEMBL1358094	CCOC(=O)[C@H](O)[C@@H](O)c1cccc(c1)[C@H](O)[C@@H](O)C(=O)OCC	342.131	-0.399	-7	24	1	8	4	8
ZINC000101153894	C/C(=C\C(=O)c1c(O)c2ccccc2n(C)c1=O)NC(CO)(CO)CO	362.148	-0.364	-6.9	26	2	7	5	8
CHEMBL500420	Cc1nc(NS(=O)(=O)c2ccc(cc2)C(C)(C)C)sc1C[C@@H]3O[C@H](CO)[C@H](O)[C@H](O)[C@H]3O	486.149	0.935	-7.7	32	3	6	5	9
CHEMBL3326444	CON(CC1=CC[C@H](CC1)C(=C)C)[C@@H]2O[C@H](CO)[C@@H](O)[C@H](O)[C@H]2NC(=O)N(C)N=O	428.227	0.283	-7.2	30	2	8	4	9
CHEMBL175051	C[C@@H](O)[C@@H]1[C@H]2[C@@H](C)C(=C(N2C1=O)C(=O)O)S[C@@H]3CN[C@@H](C3)c4cc(CO)on4	409.131	0.457	-7.8	28	4	6	4	8
CHEMBL1392460	NC1=C(C#N)C2(C(=O)Nc3ccccc23)c4c(O)nc(S)nc4O1	339.043	0.795	-7.1	24	4	0	4	8
CHEMBL543722	Cl.NC(c1cc(cc2nc(O)c(O)nc12)[N+](=O)[O-])P(=O)(O)O	351.998	0.506	-7.2	22	2	3	5	8
ZINC000585091404	CC(C)[C@H](Nc1cc(NN)c([N+](=O)[O-])cc1[N+](=O)[O-])C(N)=O	312.118	0.71	-6.7	22	1	7	4	8
CHEMBL3287018	CC(C)[C@H](NC(=O)c1csc(n1)c2csc(C)n2)C(=O)NCC(=O)NO	397.088	0.951	-7.4	26	2	7	4	8
CHEMBL1683323	O[C@@H]1[C@@H](COP(=O)(O)O)O[C@H]([C@@H]1O)n2cc(nn2)c3ccccc3F	375.063	-0.187	-8.2	25	3	5	4	8
CHEMBL3544522	O[C@H]1C(ON2C(=O)NC(C2=O)(c3ccccc3)c4ccccc4)O[C@@H]([C@@H](O)[C@@H]1O)C(=O)O	444.117	-0.694	-8.3	32	4	5	5	8
CHEMBL1794941	CC1OC2(CCN(C)CC2)C3SCCSC13.OC(=O)\C=C/C(=O)O.OC(=O)C(=O)O	465.113	0.954	-3.8	30	3	2	4	8
CHEMBL1741544	Oc1ncc(CS(=O)(=O)Cc2cnc(O)nc2O)c(O)n1	314.032	-0.796	-7.4	21	2	4	4	10
ZINC000001580560	NNc1ccc(-n2ncc(C(N)=O)c2N)nn1	234.098	-1.371	-7.4	17	2	3	4	8
CHEMBL2136224	OC[C@H]1O[C@H]([C@H](O)[C@@H](O)[C@H]1O)c2nc(cs2)C(=O)NCc3cccs3	386.061	-0.351	-7.6	25	3	5	5	9
CHEMBL150236	NC(=O)C(=O)NCCSSCCNC(=O)\C(=N\O)\Cc1ccc(O)c(Br)c1	477.998	0.627	-6.9	27	1	10	5	8
CHEMBL462818	O[C@H]1C=C2[C@@H](NC(=O)c3c(O)c4OCOc4cc23)[C@@H]5OP(=O)(O)O[C@H]15.c6c[nH]cn6	437.062	0.285	-3.2	30	6	0	5	9
ZINC000244866646	Nc1nc(NCCSc2ncn[nH]2)cc([C@H]2C[C@@H](O)C2)n1	307.122	0.619	-7.5	21	3	6	4	8
CHEMBL3621280	ONC(=O)CNC(=O)Cn1cnc2c(NCc3ccccc3)ncnc12	355.139	0.06	-8.6	26	3	7	4	8
CHEMBL3707449	CN(C)CC(=O)OC[C@@H](O)[C@@H](O)[C@H](O)[C@@H](O)C(=O)O	281.111	-3.381	-5.8	19	0	8	5	8
CHEMBL1338604	OCCNc1nc2nonc2nc1NCCO	240.097	-1.179	-6	17	2	6	4	9
ZINC000073667145	CCNc1nc(NCC)nc(NNC(=S)NC[C@@H]2CCS(=O)(=O)C2)n1	388.146	-0.039	-7.3	25	2	8	5	9
CHEMBL166	Nc1nc(N)nc(Nc2ccc(cc2)[As]3SCC(CO)S3)n1	397.996	0.316	n	22	3	4	4	9
CHEMBL1449737	S=C1NCN2CCN(CC2)CNC(=S)C(=S)NCN3CCN(CC3)CNC1=S	460.132	-1.267	-5.2	28	6	0	4	8
CHEMBL346387	Nc1cc(OC[C@H](CO)OCP(=O)(O)O)nc(N)n1	294.073	-1.468	-6.6	19	1	7	5	8
CHEMBL1818666	COc1cc(CCCO[C@@H]2O[C@H](CO)[C@@H](O)[C@H](O)[C@H]2NC(=O)C)ccc1O	385.174	-0.706	-7.7	27	2	8	5	8
ZINC001772591455	COc1ccc(/C=C2\NC(=O)[C@@]34C[C@@]5(O)[C@@H](O)C=C[C@@H](S3)[C@H]5ON4C2=O)c(O)c1OC	448.094	-0.114	-7.9	31	6	3	4	9
CHEMBL174430	[Na+].Nc1nc(cc(c2cccc(NC(=O)C(O)CCC(=O)[O-])c2)c1C#N)c3cc(Cl)ccc3O	488.086	-0.938	-7.5	34	3	7	4	8
CHEMBL3903473	COC(=O)C1=C[C@@H](O)[C@@H](O)[C@@H](O)[C@@H]1ON2C=CC(=C([C@@H]3[C@@H](C)C[C@@H](C)C[C@H]3C=C)C2=O)O	449.205	0.499	-7.4	32	3	5	4	9
CHEMBL488258	NS(=O)(=O)c1ccc(cc1)\N=N\c2nc3nc(O)nc(O)c3[nH]2	335.044	0.827	-7.9	23	3	3	4	9
CHEMBL403748	CC1=N[C@@H]2[C@@H](O)[C@@H](O)[C@@H](CO)O[C@]2(CN)S1.OC(=O)C(F)(F)F	362.076	-1.079	-4.2	23	2	2	5	8
CHEMBL516924	OC[C@H]1O[C@H]([C@H](O)[C@@H]1O)n2cc3CCNC4=CC(=O)C(=O)c2c34	320.101	-1.648	-7.6	23	4	2	4	8
CHEMBL3318257	CCN(CC)CCC1(CCOC1=O)C(=O)C.OC(C(O)C(=O)O)C(=O)O	377.169	-0.882	-5.9	26	1	9	4	8
CHEMBL1995214	CCc1nc(N)nc(C(=O)NCCNC(=O)c2nc(N)nc(CC)c2C)c1C	386.218	0.332	-8.5	28	2	7	4	8
CHEMBL593598	ONc1nc(NO)nc(n1)N2CCOCC2	228.097	-0.69	-6.8	16	2	3	4	9
CHEMBL3392250	Cc1cc(NN)nc(n1)c2ccncc2.CS(=O)(=O)O.CS(=O)(=O)O	393.078	0.141	-3.3	25	2	2	4	9
CHEMBL1852193	CCOc1onc(c1)c2nc(c[nH]2)[C@@H](O)[C@H](O)[C@H](O)CO	299.112	-0.789	-6.5	21	2	7	5	8
CHEMBL3426123	COC(=O)[C@]1(F)O[C@@H]([C@H](O)[C@H](O)COC(=O)OC(C)C)[C@H](NC(=O)C)[C@@H](N)[C@H]1F	428.161	-1.322	-6.6	29	1	7	4	10
ZINC000002279346	CCOC(=O)/C(=C/Nc1nonc1C(=N)NO)C(C)=O	283.092	-0.178	-7.2	20	1	6	4	9
CHEMBL3318259	CN(C)CCCC1(CCOC1=O)C(=O)C.OC(C(O)C(=O)O)C(=O)O	363.153	-1.272	-5.8	25	1	8	4	8
CHEMBL1192127	Cn1cc(NC(=O)Cn2ccnc2[N+](=O)[O-])cc1C(=O)NCCC(=N)N	362.145	-0.176	-8.4	26	2	8	4	8
CHEMBL3307060	CCC(C(CO)Cc1c[n+](C\C(=N/O)\c2ccc(cc2)[N+](=O)[O-])cn1C)C(=O)NO	420.188	0.782	-7.5	30	2	10	4	8
CHEMBL491140	CO[C@]1(NC(=O)[C@]2(OC(=C(C)C2=O)[C@@H](O)[C@@H](O)C=C3CCCCC3)[C@H]1O)C(=O)c4ccccc4	471.189	0.927	-8.7	34	4	6	4	8
CHEMBL29604	C[C@@H]1C2CC3[C@H](N(C)C)C(=O)C(=C(O)[C@@]3(O)C(O)C2C(=O)c4c(O)cccc14)C(=O)N	430.174	-0.153	-6.6	31	4	2	5	8
CHEMBL489475	[Na+].O[C@H]1C=C2[C@@H](NC(=O)c3c(O)c4OCOc4cc23)[C@H](OS(=O)(=O)[O-])[C@@H]1O	409.008	-4.799	-8.9	27	4	2	4	10
CHEMBL2113436	CC(C)(C)NC(=O)[C@H]1O[C@H]([C@H](O)[C@@H]1O)n2cnc3c(N)ncnc23	336.155	-1.058	-8	24	3	2	4	9
CHEMBL3426100	CC(=O)N[C@@H]1[C@@H](N)[C@@H](F)[C@@](F)(O[C@H]1[C@H](O)[C@H](O)CO)C(=O)OCC2CCCCC2	424.202	-0.941	-7.4	29	2	7	5	8
CHEMBL240535	CCCNC(=O)OC\C=C/CO[C@@H]1O[C@H](CO)[C@@H](O)[C@H](O)[C@H]1NC(=O)C	376.185	-1.361	-7.4	26	1	9	5	8
CHEMBL3342256	NS(=O)(=O)OC1CCN(CC1)S(=O)(=O)[C@@H]2O[C@H](CO)[C@@H](O)[C@H](O)[C@H]2O	406.072	-4.199	-7.9	25	2	5	5	10
ZINC000095461270	COC(=O)c1sccc1NC(=O)C(=O)NCCCc1n[nH]c(N)c1C#N	376.095	0.399	-8	26	2	6	4	8
ZINC000101268480	CC1(C)OC(=O)C(=CNc2ccc(S(=O)(=O)NC(=N)N)cc2)C(=O)O1	368.079	-0.01	-9.1	25	2	4	4	8
ZINC000263605367	C[Sn](C)(n1cnc(=N)nc1O)n1cnc(=N)nc1O	372.011	-1.662	n	19	2	2	4	10
CHEMBL608390	OC[C@H]1O[C@@]2(CC(=NO2)c3ccc(cc3)[N+](=O)[O-])[C@H](O)[C@@H](O)[C@@H]1O	340.091	-1.111	-8.2	24	3	3	4	9
CHEMBL4112800	N[C@H](CCP(=O)(O)C(O)c1ccc(SCC(=O)O)c(c1)[N+](=O)[O-])C(=O)O	408.039	0.835	-6.8	26	1	10	5	8
CHEMBL1160158	CCN1C2CCC1CC(C2)OC(=O)C(CO)c3ccccc3.OC(C(O)C(=O)O)C(=O)O	453.2	0.198	-5.2	32	3	8	5	8
CHEMBL1988400	CC(=O)c1cccc(NC(=O)C(=O)NNc2nnc(S)n2N)c1	335.08	-0.435	-7.7	23	2	4	5	9
CHEMBL3426108	CC(=O)N[C@@H]1[C@@H](N)[C@@H](F)[C@@](F)(O[C@H]1[C@H](O)[C@H](O)CO)C(=O)OCc2cccs2	424.112	-1.26	-7.4	28	2	7	5	9
CHEMBL2013178	N\C(=N/O)\c1nc(Cl)c(NCC(=O)OCc2ccccc2)nc1N	350.089	0.962	-7.8	24	2	6	4	8
ZINC000040266417	CCC(CO)(CO)NC(=O)c1nc(CC(=O)Nc2cc(C)on2)no1	353.134	-0.59	-7.6	25	2	8	4	9
CHEMBL3221800	O[C@@H]1C[C@@](O)(C=C([C@H]1O)c2cn(nn2)c3cccc(c3)[N+](=O)[O-])C(=O)O	362.086	-0.5	-9	26	3	4	4	9
CHEMBL1086192	OC[C@H]1O[C@H]([C@H](O)[C@@H](O)[C@@H]1O)c2ccc(Cl)c(Cc3ccc(OC4CCOCC4)nn3)c2	466.151	0.793	-8.4	32	4	6	4	9
CHEMBL211274	CC#CCOc1ccc(cc1)S(=O)(=O)CC2(CCN(CC2)C(=O)C(C)(CO)CO)C(=O)NO	482.172	-0.032	-8.6	33	2	9	4	8
ZINC001772700311	Cc1cccc(Nc2nc(N)nc(CN3C[C@@]4(C(=O)O)C[C@@]4(C(=O)O)C3)n2)c1	384.155	0.867	-8.7	28	4	6	4	8
CHEMBL3327047	O[C@H]1C=C[C@H](O)[C@@H]2[C@@H]1C[C@@]34SS[C@]5(C[C@@H]6[C@@H](O)C=C[C@H](O)[C@H]6N5C3=O)C(=O)N24	424.076	-1.195	-7.1	28	7	0	4	8
ZINC000000352331	NC1=C2NC(c3ccc([N+](=O)[O-])cc3)=NN2NN1	247.082	-0.73	-8	18	3	2	4	8
CHEMBL1080328	C[C@@H](NC(=O)[C@@]1(C)COC(=N1)c2cn(C)c3cc(Cl)cc(O)c23)C(=O)N[C@@H](CO)C(=O)O	466.126	0.139	-7.9	32	3	7	5	8
ZINC000002390410	CC(=O)Nc1nonc1NC(=O)CSc1nc(N)cc(N)n1	324.075	-0.287	-8.3	22	2	5	4	10
CHEMBL134642	[K+].COc1ccc(CCC(=O)c2c(O)cc(OCCCP(=O)(O)[O-])cc2O)cc1O	464.064	-1.054	-1.1	30	2	10	4	8
CHEMBL3606098	O[C@H]1C[C@@H](O[C@@H]1COP(=O)(O)C(F)(F)P(=O)(O)O)N2C=C(F)C(=O)NC2=O	440	-0.746	-8.3	27	2	6	5	8
CHEMBL3950973	O=C1NC(=O)\C(=C\c2cnn3c(NC4CC4)nc(NC5CCS(=O)(=O)C5)nc23)\N1	418.117	-0.522	-8.6	29	5	5	4	10
CHEMBL4059764	COc1cccc(c1)N2C(O[C@@H]3O[C@H](CO)[C@@H](O)[C@H](O)[C@H]3O)C(OC2=O)c4ccc(F)cc4	465.144	0.675	-7.8	33	4	6	4	9
CHEMBL3091868	N\N=C\C(O)C(O)C(O)C(CC(=O)c1ccncc1)C(=O)c2ccncc2	372.143	-0.424	-7.9	27	2	9	4	9
CHEMBL3392184	[Br-].C[S+](C[C@@H]1O[C@@H]([C@@H](O)[C@H]1O)n2cnc3c(N)ncnc23)C4CC(N)C=C4	458.074	-4.064	-0.9	27	4	4	4	9
ZINC000257289609	CN(CCO)C(=O)[C@@H]1CS[C@@H]2[C@H](O)[C@@H](O)[C@H](O)[C@H](O)C(=O)N12	336.099	-3.836	-6.1	22	2	3	5	8
ZINC000104367695	CCOC(=O)[C@@H](C(=N)C(=N)[C@@H](C(=O)O)C(=O)OCC)C(=O)O	316.091	-0.446	-6.5	22	0	9	4	8
ZINC000002050032	OCCNc1nnc(NCCO)nn1	200.102	-1.925	-5.7	14	1	6	4	8
CHEMBL607774	CCCCCOC(=O)NC1=NC(=O)N(C=C1F)C2O[C@@H]([C@@H](O)[C@H]2O)C(=O)O	389.123	-0.175	-7.4	27	2	7	4	9
CHEMBL1973719	CCCC[S+](=O)(N)CCC(N)P(=O)(O)O.[O-]c1c(cc(cc1[N+](=O)[O-])[N+](=O)[O-])[N+](=O)[O-]	487.077	0.497	-5.9	31	1	10	4	10
CHEMBL1883352	CC(C)(O)C#Cc1ccc(CNC[C@H]2O[C@H]([C@H](O)[C@@H]2O)n3cnc(n3)C(=O)N)s1	421.142	-1.03	-7.8	29	3	6	5	10
CHEMBL2062316	CN1C[C@@H]2CN(C[C@@H]2C1)c3ccc(nn3)c4ccccc4C.OC(C(O)C(=O)O)C(=O)O	444.201	0.327	-6.6	32	4	5	4	8
ZINC000000108824	CCN(CC)c1nc(NCC(=O)O)nc(NCC(=O)O)n1	298.139	-0.289	-5.7	21	1	9	4	8
CHEMBL528475	CCCCCc1cnc2nc(N)nc(N)c2c1.OCCS(=O)(=O)O	357.147	0.788	-3.9	24	2	6	4	8
CHEMBL2132563	OC[C@H]1O[C@H]([C@H](O)[C@@H](O)[C@H]1O)c2nc(cs2)c3onc(n3)c4ccc(F)cc4	409.074	0.514	-7.1	28	4	4	4	10
CHEMBL1208039	OC(C(=O)c1ccc(cc1)c2ccc(cc2)C(=O)C(O)S(=O)(=O)O)S(=O)(=O)O	430.003	0.131	-6.8	28	2	7	4	8
ZINC000016994693	CN1CCN2c3ccc(N/C=C4/C(=O)NC(=S)N(C)C4=O)cc3CC3(C(=O)NC(=O)NC3=O)[C@@H]2C1	497.148	-1.116	-8	35	5	2	4	9
CHEMBL3287015	CC(C)[C@H](NC(=O)c1csc(n1)c2cscn2)C(=O)NCC(=O)NO	383.072	0.643	-6.2	25	2	7	4	8
CHEMBL3642955	CC(Cc1ccc(s1)C(=O)Oc2ccc(cc2)C(=N)N)C(=O)N[C@@H](CS(=O)(=O)O)C(=O)O	483.077	0.887	-6.9	32	2	10	5	8
CHEMBL135482	[Na+].CNc1ccc(CCC(=O)c2c(O)cc(OCC(=O)[O-])cc2O)cc1O	383.098	-2.207	-1.3	27	2	8	4	8
CHEMBL2018048	Nc1nc(Cl)c(c(N[C@@H]2C[C@H](CO)[C@@H](O)[C@H]2O)n1)c3cccs3	356.071	0.955	-5.9	23	3	4	5	8
CHEMBL309926	Nc1ncnc(N[C@@H]2O[C@H](CO)[C@@H](O)[C@H]2O)c1[S+]([O-])c3ccccc3	366.1	-0.924	-6.2	25	3	5	5	9
ZINC000136705467	N=C1C=CC2=CC(S(=O)(=O)O)=CC(=O)C2=C1NNc1ccc([N+](=O)[O-])cc1S(=O)(=O)O	468.005	0.882	-7.1	31	3	6	5	10
ZINC000006016588	COC(=O)C(C(=O)CSc1nnc(O)[nH]c1=O)=C1Nc2ccccc2N1	375.064	0.454	-6.3	26	3	5	4	10
CHEMBL411920	C[C@]1(CO)O[C@@H](n2cc(Br)c3c(N)ncnc23)[C@](C)(O)[C@]1(C)O	386.059	0.558	-6.4	23	3	2	4	8
CHEMBL2064325	Cn1cnc2cc(cnc12)c3ccc(O[C@H]4O[C@H](CO)[C@@H](O)[C@H](O)[C@@H]4O)c(Cl)c3	421.104	0.467	-7.5	29	4	4	4	9
CHEMBL2219757	CCOCC.NC(=O)c1nonc1CNC(C2CCNCC2)c3c[nH]cn3	379.233	0.765	-2.9	27	3	8	4	8
CHEMBL3218372	CN(CC(O)C(O)C(O)C(O)CO)C=C(C#N)C#N	271.117	-2.715	-5.3	19	0	7	5	8
CHEMBL1967008	NNc1oc(nn1)c2oc(NN)nn2	198.061	-1.309	-6.3	14	2	3	4	10
CHEMBL608375	CO[C@@H]1[C@@H](O)[C@@H](O)[C@H](Oc2cc(O)c3C(=O)C(=COc3c2)NC(=O)C)OC1(C)C	409.137	0.707	-7.2	29	3	4	4	9
CHEMBL353488	NCCCCN(CCCN)c1nc(N)nc(N)n1	254.197	-1.07	-5.7	18	1	8	4	8
CHEMBL179851	COc1ccc(N[C@@]23C4OC[C@@H](O)C4OC2C5(COC6[C@H](O)CO[C@H]56)Nc7ccc(OC)cc37)cc1	498.2	0.861	-7.2	36	7	4	4	10
CHEMBL243211	Nn1c(S)nnc1Cc2csc(NCCC(=O)O)n2	300.046	0.214	-6.2	19	2	6	4	9
CHEMBL606296	C[C@H]1OC([C@H](O)[C@@H]1O)n2cnc3c(nc(N)nc23)[S+](N)[O-]	314.08	-1.971	-6.4	21	3	2	4	10
CHEMBL1090580	OC[C@H]1O[C@H]([C@H](O)[C@@H](O)[C@H]1O)n2cc(nn2)c3ccccc3C(F)(F)F	375.104	-0.064	-7.2	26	3	3	4	8
CHEMBL1965239	NCCCN1CCN(CC(=O)O)CCN(CCCN)CCN(CC(=O)O)CC1	402.295	-1.925	-4.6	28	1	10	4	8
CHEMBL54324	Nc1nc(cs1)\C(=N\O)\C(=O)N[C@H]2[C@H]3SCC(=C(N3C2=O)C(=O)O)\C=C\4/CCNC4=O	464.057	-0.912	-6.6	31	4	5	5	10
CHEMBL1159472	OC[C@H]1OC(Oc2ccc(cc2)[N+]#N)[C@H](O)[C@@H](O)[C@@H]1O.[O-]C(=O)C(F)(F)F	396.078	-1.352	-6.5	27	2	3	4	9
ZINC000008781044	CC(=O)Nc1n[nH]c(SCSc2nc(NC(C)=O)n[nH]2)n1	328.052	0.681	-6.2	21	2	6	4	8
ZINC000220973999	C/C(=N\NC1=NCCN1)c1cccc(/C(C)=N/NC2=NCCN2)n1	327.192	-0.373	-6.8	24	3	4	4	9
CHEMBL250656	Nc1cccc2c1ncn2[C@@H]3O[C@H](CSCCC(=O)O)[C@@H](O)[C@H]3O	353.105	0.446	-5.7	24	3	6	4	8
CHEMBL1407204	COC(=O)[C@@H]1C[C@@]2(O)[C@@H](O)[C@@H](O)[C@@H](O)C[C@H]2N1Cc3cccnc3	338.148	-1.585	-5.7	24	3	3	4	8
CHEMBL1871545	COc1ccccc1NS(=O)(=O)c2c(N)nc(O)nc2O	312.053	0.279	-6.2	21	2	4	4	8
ZINC000002831167	Nc1cc(N)nc(SCCCSc2nc(N)cc(N)n2)n1	324.094	0.87	-5.7	21	2	6	4	10
CHEMBL518191	NC(=O)c1c(CNC(C2CCNCC2)c3c[nH]cn3)no[n+]1[O-].OC(=O)C(F)(F)F	435.148	-0.406	-4.2	30	3	6	5	8
CHEMBL229397	N[C@@H](C=O)[C@@H](O)[C@H](O)[C@H](O)COS(=O)(=O)O	259.036	-3.585	-5.8	16	0	7	5	8
CHEMBL317303	CC(C)(C)OC(=O)[C@H](CCN)NC(=O)[C@@H](N)CCC\N=C(/N)\N[N+](=O)[O-]	375.223	-1.635	-5.7	26	0	10	5	8
CHEMBL3763929	OC[C@H]1O[C@@]2(CC(=NO2)c3ccc4OCOc4c3)[C@H](O)[C@@H](O)[C@@H]1O	339.095	-1.29	-7.4	24	4	2	4	9
CHEMBL3139276	CN(C1CN=C(NC(=O)N)NC1=O)C(=O)C[C@@H](N)c2cc(CN)on2	352.161	-2.496	-6.4	25	2	5	5	8
ZINC000016957464	Nc1nc(O)c(N=O)c(NCCO)n1	199.071	-0.434	-5.5	14	1	4	4	8
CHEMBL2105983	[Ca+2].Nc1ccc(C(=O)[O-])c(O)c1.Nc2ccc(C(=O)[O-])c(O)c2	344.032	-1.705	-6.1	23	2	2	4	8
CHEMBL3542365	CC(CO[C@@H]1O[C@@H]([C@@H](O)[C@H](O)[C@H]1O)C(=O)O)[C@]2(C)SC(=NC2=O)N[C@H]3C[C@@H]4CC[C@H]3C4	458.172	-0.302	-6.6	31	4	6	5	9
CHEMBL502002	COC(=O)Cn1cc(C[C@@H]2O[C@H](CO)[C@H](O)[C@H](O)[C@H]2O)nn1	317.122	-3.164	-6.1	22	2	5	4	10
CHEMBL244489	NNC(=O)CSc1nnc(Cc2csc(NC(=O)CCl)n2)n1NC(=O)c3ccccc3	480.055	0.969	-6.6	31	3	9	4	10
CHEMBL3763810	COc1ccc2cc(ccc2c1)C3=NO[C@@]4(C3)O[C@H](CO)[C@@H](O)[C@H](O)[C@H]4O	375.132	0.143	-7.9	27	4	3	4	8
CHEMBL3910424	Nc1ccc(cc1)S(=O)(=O)Nc2ccc(cc2)S(=O)(=O)Nc3nnc(s3)S(=O)(=O)N	489.986	0.369	-6.9	30	3	7	4	10
ZINC000104246954	Oc1nnc(O)c2nc(O)c(O)nc12	196.023	-0.758	-6.2	14	2	0	4	8
CHEMBL468092	CN(C\C=C/CN)C[C@H]1O[C@H]([C@H](O)[C@@H]1O)n2cnc3c(N)nc(Cl)nc23	383.147	-0.872	-6.6	26	3	6	4	10
CHEMBL1162463	NC1C=C(OC[C@@H]2CP(=O)(O)CO2)N=C(N)N1O	278.078	-1.225	-6.4	18	2	3	4	8
ZINC000012547435	Cc1nc2nc(N)nn2c(C)c1CCC(=O)NCCCCCc1n[nH]c(N)c1C#N	410.229	0.962	-6.2	30	3	9	4	9
CHEMBL1254855	Nc1nc(N)c2nc(CNc3ccc(cc3)S(=O)(=O)O)cnc2n1	347.08	0.443	-7	24	3	4	4	9
CHEMBL160699	CN(Cc1cnc2nc(N)nc(N)c2n1)c3ccc(cc3)C(=O)NC(C(=O)O)C(F)(F)CC(=O)O	490.152	0.514		35	3	9	5	10
CHEMBL2357611	COc1ccc(Cl)cc1c2noc(n2)[C@@H]3O[C@H](CO)[C@H](O)[C@H](O)[C@H]3O	372.072	-0.087		25	3	4	4	9
CHEMBL107952	CNc1nc(Cl)nc2c1ncn2CC(CO)COP(=O)(O)O	351.05	0.239		22	2	7	4	8
CHEMBL3273013	C[C@H](NC(=O)C)C(=O)N[C@@H](C)C(=O)N1CCC[C@H]1C(=O)NN(C)C(=O)O[C@@H](C)C(=O)NN	457.228	-2.515		32	1	7	5	8
CHEMBL1975040	CCOC(=O)[C@H](CO)NC1=C(Cl)C(=O)c2c(O)ccc(O)c2C1=O	355.046	0.441		24	2	5	4	8
CHEMBL17844	CC(C)(C)NCC(O)COc1nsnc1NCCO	290.141	0.07		19	1	8	4	8
CHEMBL1196573	CN\C(=C/[N+](=O)[O-])\NCc1cccc(n1)c2csc(N=C(N)N)n2	348.112	0.495		24	2	7	4	8
CHEMBL135430	[Na+].COc1ccc(CC\C(=N/O)\c2c(O)cc(OCC(=O)[O-])cc2O)cc1O	399.093	-2.244		28	2	8	4	9
CHEMBL231053	O[C@H](Cn1ccnc1)[C@@H](O)[C@H](O)[C@H](O)Cn2ccnc2	282.133	-1.777		20	2	7	4	8
CHEMBL1967268	CC1(O)CC2(O)C=CC3=C(C(=O)c4cccc(O)c4C3=O)C2(O)C(=O)C1O	372.085	-0.815		27	4	0	5	8

## Sheet: Thymidine kinase
ID	SMILES	MW	logP	Affinity	numAtoms	numRings	numRotBonds	numHDon	numHAcc
ZINC000005217481	Cn1c2nc(N/N=C/c3ccccc3O)n(CCO)c2c(=O)[nH]c1=O	344.123	-0.433	-5.9	25	3	5	4	9
ZINC000048740366	Cc1ccc([N+](=O)[O-])cc1N[C@@H]1O[C@@H](CO)[C@H](O)[C@@H](O)[C@@H]1O	314.111	-0.885	-6.6	22	2	4	5	8
CHEMBL1209149	COc1ccc2C(=O)C(=COc2c1O[C@@H]3O[C@H](CO)[C@@H](O)[C@H](O)[C@H]3O)c4ccc(O)cc4	446.121	0.353	-6.6	32	4	5	5	10
ZINC000253532277	COc1cc(C(=O)O[C@H]2O[C@@H](CO)[C@H](O)[C@@H](O)[C@@H]2O)cc(OC)c1OC	374.121	-1.331	-6.5	26	2	6	4	10
CHEMBL3230009	CC(=O)NCc1cccc(N\C(=C\2/C(=O)OC(=O)C(=C2O)C(=O)C)\O)c1	360.096	0.989	-7.4	26	2	5	4	8
ZINC000257289609	CN(CCO)C(=O)[C@@H]1CS[C@@H]2[C@H](O)[C@@H](O)[C@H](O)[C@H](O)C(=O)N12	336.099	-3.836	-6	22	2	3	5	8
CHEMBL2093940	NC1=NC(=O)N(C=C1[Se]c2ccccc2)[C@@H]3O[C@H](CO)[C@@H](O)[C@H]3O	399.033	-2.908	-7.4	24	3	4	4	8
ZINC000033369585	NCCCCCN1C(=O)c2cc(S(=O)(=O)O)cc3c(N)c(S(=O)(=O)O)cc(c32)C1=O	457.061	0.64	-5.3	30	3	7	4	8
CHEMBL217391	CCCC1=CC(=O)N([C@@H]2O[C@H](COP(=O)(O)O)[C@@H](O)[C@H]2O)C(=O)N1	366.083	-1.782	-7.5	24	2	6	5	8
CHEMBL1092803	Nc1nc(S[C@@H]2O[C@H](O)[C@@H](O)[C@H](O)[C@H]2O)c(C#N)c(c3ccc(Br)cc3)c1C#N	477.995	0.686	-6.7	29	3	3	5	10
CHEMBL611261	COC(C)c1cn(C2O[C@H](CO)[C@@H](O)[C@H]2O)c3ncnc(N)c13	324.143	-0.668	-6.5	23	3	4	4	9
ZINC000006178440	CN(/N=C/C(=N\Nc1ccccc1)[C@@H](O)[C@@H](O)[C@H](O)CO)c1ccccc1	372.18	0.652	-6.4	27	2	9	5	8
CHEMBL3229422	Br.NCc1cc(C(=O)N)n(n1)[C@@H]2O[C@H](CO)[C@@H](O)[C@H]2O	352.038	-2.37	-7.7	20	2	4	5	8
ZINC000004774176	CC(=O)Nc1cc2c(ncn2[C@H]2O[C@@H](CO)[C@@H](O)[C@@H]2O)c(Br)n1	386.023	-0.236	-5.9	23	3	3	4	8
ZINC000257274422	NCc1ccc(C(=O)N[C@@H]2CC[C@H](O)[C@@H](n3cnc4c3ncnc4N)[C@@H]2O)cc1	397.186	-0.277	-7.3	29	4	4	5	9
CHEMBL26012	CN(Cc1cnc2nc(N)nc(N)c2n1)c3ccc(cc3)C(=O)NCCCCS(=O)(=O)O	460.164	0.618	-7.4	32	3	9	4	10
CHEMBL2113506	CC(O)C#Cc1nc(N)c2ncn([C@@H]3O[C@H](CO)[C@@H](O)[C@H]3O)c2n1	335.123	-2.248	-6.8	24	3	2	5	10
ZINC000036369724	CN(C[C@@H](O)[C@@H](O)[C@H](O)[C@H](O)CO)C(=O)COc1ccc2c(c1)oc(=O)c1ccccc21	447.153	-0.781	-7	32	3	9	5	9
CHEMBL4096864	CC(=O)N[C@@H]1[C@@H](O)C=C(O[C@H]1[C@H](O)[C@H](O)Cn2cc(nn2)c3ccc(F)cc3)C(=O)O	436.139	-0.961	-7.4	31	3	7	5	9
CHEMBL1555466	C[N+](C)(C)c1nc(N)nc2c1ncn2[C@H]3O[C@@H](CO)[C@@H](O)[C@H]3O	325.162	-1.783	-6.6	23	3	3	4	9
ZINC000253536158	CNc1nc(O)c2nc(C(=O)O)c(O)nc2n1	237.05	-0.429	-7.8	17	2	2	4	8
CHEMBL514454	Cc1c(nnn1Cc2ccccc2)C(=O)O[C@H]3[C@@H](O)[C@H](O)O[C@H](CO)[C@H]3O	379.138	-1.408	-8.3	27	3	5	4	10
ZINC000004279275	O=[N+]([O-])c1ccccc1O[C@H]1O[C@@H](CO)[C@@H](O)[C@@H](O)[C@H]1O	301.08	-1.227	-6.4	21	2	4	4	8
CHEMBL1964970	OCC(O)C1OC(=O)C2(OC(=O)CC2c3ccc(O)cc3)C1O	324.085	-1.199	-5.8	23	3	3	4	8
ZINC000005379402	Cc1cc(N(C)C[C@H](O)[C@H](O)[C@H](O)[C@H](O)CO)n2ncnc2n1	327.154	-2.695	-7.5	23	2	7	5	10
CHEMBL3246424	CC(C)(C)CNC(=O)Nc1ncnc2c1ncn2[C@@H]3O[C@H](CO)[C@@H](O)[C@H]3O	380.181	-0.395	-7.1	27	3	4	5	9
ZINC001560410208	C=C1[C](CO)[C@@H](O)C[C@@H]1n1cnc2c1nc(N)nc2O	276.11	-0.457	-6.8	20	3	2	4	8
ZINC000008652531	CC(=O)Nc1ccc(S(=O)(=O)Nc2c(N)nc(S)nc2O)cc1	355.041	0.812	-7.7	23	2	4	5	8
ZINC000004718463	CN(C)c1nc2c(ncnc2N)n1[C@H]1O[C@@H](CO)[C@@H](O)[C@@H]1O	310.139	-1.914	-6.6	22	3	3	4	10
CHEMBL81317	NC1=NC(=O)N(C=C1)C2CSC(COC(=O)NCP(=O)(O)O)O2	366.04	-0.725	-7.2	23	2	5	4	9
CHEMBL262072	Nc1nc(SCCc2ccccc2)c3ncn([C@@H]4O[C@H](CO)[C@@H](O)[C@H]4O)c3n1	403.131	0.355	-7.8	28	4	6	4	10
CHEMBL4086637	OC[C@H]1O[C@H]([C@H](O)[C@@H]1O)n2cnc3C(=O)NC(=Nc23)NC(=O)c4ccccc4	387.118	-1.017	-7.9	28	4	4	5	9
ZINC000006119248	OCCNc1ncnc2c1ncn2[C@@H]1O[C@H](CO)[C@@H](O)[C@H]1O	311.123	-2.158	-7	22	3	5	5	10
CHEMBL1093830	CSc1ccc(Nc2nc(C(=O)N)n(n2)[C@@H]3O[C@H](CO)[C@@H](O)[C@H]3O)cc1	381.111	-0.546	-8.1	26	3	6	5	10
CHEMBL3249382	NC(=O)COC1=CN([C@@H]2O[C@H](CO)[C@@H](O)[C@H]2O)C(=O)NC1=O	317.086	-3.988	-8.1	22	2	5	5	9
ZINC000257265282	C[C@]1(O)COC2(CCN(C(=O)[C@@H](N)Cc3ccc(O)cc3)CC2)C[C@@H]1n1ccc(O)nc1=O	458.217	0.298	-6	33	4	4	4	9
ZINC000004962234	CC(C)=CCNc1ncnc2c1ncn2[C@H]1O[C@@H](CO)[C@@H](O)[C@H]1O	335.159	-0.184	-7	24	3	5	4	9
CHEMBL309554	Nc1nc(O)c(N=O)c(NC[C@H]2C[C@H]2CO)n1	239.102	0.203	-7.8	17	2	5	4	8
CHEMBL464118	OCCC(=C)C(=O)OC[C@H]1O[C@@H](Oc2ccc(O)cc2)[C@H](O)[C@@H](O)[C@@H]1O	370.126	-0.94	-7.4	26	2	7	5	9
ZINC000044137688	O=C(O)CN1CCN(CC(=O)O)CCN(CC(=O)NCCS)CCN(CC(=O)O)CC1	463.21	-2.492	-4.7	31	1	10	5	9
CHEMBL451190	NCC(=O)Nc1ccc(cc1)S(=O)(=O)Nc2nnc(s2)S(=O)(=O)N	392.003	-1.116	-6.5	24	2	6	4	9
CHEMBL1204422	COC(=O)[C@@H](CCC\N=C(\N)/N[N+](=O)[O-])NC(=O)[C@H](N)Cc1ccccc1.OC(=O)C(F)(F)F	494.174	-0.276	-5.1	34	1	10	5	8
ZINC000004720767	CC(C)CSc1nc(N)nc2c1ncn2[C@@H]1O[C@@H](CO)[C@@H](O)[C@@H]1O	355.131	-0.232	-6.5	24	3	5	4	10
CHEMBL205933	O\N=C\[C@H]1O[C@H]([C@H](O)[C@@H]1O)n2cnc3c(NC4CC4)ncnc23	320.123	-0.52	-6.8	23	4	4	4	10
ZINC000019318821	O=[N+]([O-])C(=C1N[C@H](O)[C@@H](O)N1)[N+](=O)[O-]	206.029	-2.504	-7.7	14	1	2	4	8
ZINC000004900921	CO[C@H]1O[C@@H](CO)[C@@H](O)[C@@H](NC(=O)CNC(=O)OCc2ccccc2)[C@@H]1O	384.153	-1.517	-9	27	2	7	5	8
CHEMBL104886	CNc1nc(Cl)nc2c1ncn2C[C@@H](COP(=O)(O)O)OP(=O)(O)O	417.001	0.109	-7.6	25	2	8	5	9
ZINC000005885435	O=c1c2cc(Br)ccc2nc(-c2ccccc2)n1NC[C@]1(O)OC[C@@H](O)[C@@H](O)[C@H]1O	477.054	0.171	-7.7	30	4	4	5	9
CHEMBL161215	COC12[C@@H]3N[C@@H]3CN1c4c(O)c(C)c(\N=C/5\C=CC(=N)N=C5)c(O)c4[C@@H]2COC(=O)N	426.165	0.792	-6.1	31	5	4	5	9
ZINC000012320987	Cn1c2nc(NN=C3C(=O)NC(=O)NC3=O)[nH]c2c(=O)n(C)c1=O	334.077	-2.906	-8.9	24	3	2	4	10
CHEMBL173175	COc1cc(Cc2cnc(N)nc2N)cc(OC)c1OCC(O)CO	350.159	-0.019	-6.1	25	2	8	4	9
CHEMBL462894	COC(=O)C1=CO[C@@H](O[C@@H]2O[C@H](CO)[C@@H](O)[C@H](O)[C@H]2O)[C@H]3[C@@H]1CC=C3CO	388.137	-2.229	-6.2	27	3	5	5	10
CHEMBL3189967	C[C@H](NC(=O)OC(C)(C)C)C(=O)N\N=C\c1c(C)nc(O)nc1O	339.154	0.56	-6.8	24	1	4	4	8
CHEMBL41468	COC(=O)[C@H](Cc1cccc(OC(=O)C)c1)NC(=O)[C@@H](NC(=O)[C@@H](N)CS)C(C)C	439.178	0.21	-6.3	30	1	10	4	8
CHEMBL2006048	NC1C(O)C(O)C(CO)OC1N2C=C(F)C(=O)NC2=O	291.087	-3.386	-7.4	20	2	2	5	8
ZINC000670449788	Cc1cc(O)nc(CCNC(=O)Cc2c(C)nc(O)nc2O)n1	319.128	-0.098	-7.8	23	2	5	4	8
ZINC000005544789	CO[C@@H]1O[C@@H](Nc2nc(SC)[nH]c(=O)c2C(C)=O)[C@@H](O)[C@H](O)[C@@H]1O	361.094	-1.482	-7.3	24	2	5	5	10
CHEMBL1077078	COc1cc(O[C@@H]2O[C@H](CO)[C@@H](O)[C@H](O)[C@H]2O)ccc1O	302.1	-1.421	-6.5	21	2	4	5	8
ZINC000034554786	CC(=O)N[C@@H]1[C@@H](O)[C@H](O)[C@@H](CO)O[C@H]1OC1=C[C@@H]2OC(=O)C=C(C)[C@@H]2C=C1	381.142	-1.112	-6.7	27	3	4	4	8
ZINC000035074915	Nc1nc(SC(F)(F)F)nc2c1ncn2[C@H]1O[C@@H](CO)[C@@H](O)[C@H]1O	367.056	-0.368	-6.6	24	3	3	4	10
CHEMBL346387	Nc1cc(OC[C@H](CO)OCP(=O)(O)O)nc(N)n1	294.073	-1.468	-7	19	1	7	5	8
CHEMBL549843	OC[C@H]1O[C@H]([C@H](O)[C@@H](O)[C@@H]1O)c2onc(n2)c3ccc4ccccc4c3	358.116	0.405	-7.9	26	4	3	4	8
CHEMBL319610	CN(C)c1ncnc2c1ncn2CC#CCCOC(=O)N[C@H](CCCNC(=N)N)C(=O)O	445.219	-0.272	-7.4	32	2	10	5	9
CHEMBL1093227	CO[C@@H]1O[C@H](Cn2cc(CC(C)O)nn2)[C@H](O)[C@H](O)[C@H]1O	303.143	-2.345	-6.7	21	2	5	4	9
CHEMBL196725	CCn1c2ccccc2c3cc(\C=N\O[C@@H]4OC(CO)C(O)[C@H](O)C4O)ccc13	400.163	0.965	-7.7	29	4	5	4	8
CHEMBL64562	CCCSC[S+]([O-])C[C@H](CO)NC(=O)\C=C\c1c(C)nc(O)nc1O	389.108	0.536	-5.9	25	1	10	4	8
CHEMBL3901960	CN1CCC(CNc2nc(NC3CC3)n4ncc(\C=C\5/NC(=O)NC5=O)c4n2)CC1	411.213	0.633	-7.5	30	5	6	4	9
CHEMBL351129	OCCSC1=CN(O[C@H]2CC(O)[C@@H](CO)O2)C(=O)NC1=O	320.068	-2.482	-6.7	21	2	6	4	9
ZINC000015218516	NC(=O)C[C@]1(C(=O)O)N[C@@H](c2ccccc2O)[C@@H]2C(=O)N(c3ccccc3[N+](=O)[O-])C(=O)[C@H]21	454.112	0.449	-6.2	33	4	6	4	8
CHEMBL2418236	COc1cc(\C=C\C(=O)O[C@H]2C[C@@H](O)[C@H](O)[C@@H](O)[C@H]2O)ccc1O	340.116	-0.827	-7	24	2	4	5	8
ZINC000013148111	Cc1oc([C@H](O)[C@@H](O)[C@@H](O)CO)cc1C(=O)OCc1ccc(C#N)cc1	361.116	0.564	-7.8	26	2	7	4	8
ZINC001569975877	CN1CCN2c3ccc(O[C@@H]4O[C@H](C(=O)O)[C@@H](O)[C@H](O)[C@H]4O)cc3Cc3ccccc3[C@H]2C1	456.19	0.355	-7.6	33	5	3	4	8
ZINC000012406941	Nc1nc2c(nc(SCc3cccc4ccccc43)n2[C@@H]2O[C@H](CO)[C@@H](O)[C@@H]2O)c(=O)[nH]1	455.126	0.759	-7.3	32	5	5	5	10
ZINC000005541123	C[C@H](O)[C@H]1O[C@@H](n2cnc3c2nc[nH]c3=S)[C@@H](O)[C@H]1O	298.074	-0.511	-6.2	20	3	2	4	8
ZINC000252427595	O=C(O[C@H]1[C@H](O)[C@H](O)[C@@H](OC(=O)c2cccnc2)[C@H](O)[C@@H]1O)c1cccnc1	390.106	-1.315	-7.8	28	3	4	4	10
ZINC000038801837	O=C1[C@@H]2[C@H]3C=C[C@H](O3)[C@H]2C(=O)N1/N=C/[C@H](O)[C@H](O)[C@H](O)[C@H](O)CO	342.106	-3.653	-7.6	24	3	6	5	9
ZINC000013376215	COc1cc(O)cc(O[C@@H]2O[C@@H](CO)[C@@H](O)[C@@H](O)[C@@H]2O)c1	302.1	-1.421	-6.3	21	2	4	5	8
CHEMBL1208974	OC[C@H](OS(=O)(=O)[O-])[C@H](O)C[S+]1C[C@@H](O)[C@H](O)[C@H]1CO	334.039	-4.1	-6.3	20	1	7	5	9
ZINC000004100747	O=[N+]([O-])c1ccccc1S[C@H]1O[C@H](CO)[C@@H](O)[C@H](O)[C@H]1O	317.057	-0.513	-6.3	21	2	4	4	8
CHEMBL559285	NC(=O)c1ncn(n1)[C@@H]2O[C@H](CSCCO)[C@@H](O)[C@H]2O	304.084	-2.278	-7.1	20	2	6	4	9
ZINC000004129505	COC(=O)c1ccc2ccccc2c1O[C@H]1O[C@@H](CO)[C@@H](O)[C@@H](O)[C@@H]1NC(C)=O	405.142	-0.051	-5.6	29	3	5	4	8
ZINC000005423663	C=CCSc1ncnc2c1n[nH]c2[C@@H]1O[C@@H](CO)[C@@H](O)[C@@H]1O	324.089	-0.215	-6.7	22	3	5	4	8
ZINC000005540634	COc1ccc(-c2c(C#N)c(N)n([C@H]3OC[C@@H](O)[C@@H](O)[C@@H]3O)c(=S)c2C#N)cc1	414.1	0.83	-5.9	29	3	3	4	10
CHEMBL176448	Nc1nc(O)c2ncn(COCCCCCP(=O)(O)O)c2n1	331.105	0.436	-7.6	22	2	8	4	8
CHEMBL473950	COc1cccc(c1OC)c2nc(C(=O)N=C(N)N)c(C)[nH]2.CS(=O)(=O)O.CS(=O)(=O)O	495.109	-0.176	-4.1	32	2	4	5	8
CHEMBL317303	CC(C)(C)OC(=O)[C@H](CCN)NC(=O)[C@@H](N)CCC\N=C(/N)\N[N+](=O)[O-]	375.223	-1.635	-6.7	26	0	10	5	8
CHEMBL254584	CCCCCC(=O)N[C@@H]1[C@@H](O)[C@H](O)[C@@H](CO)O/C/1=N\OC(=O)Nc2ccccc2	409.185	0.727	-8.4	29	2	8	5	8
ZINC000020616091	Cn1cc(C(=O)O)c(C(=O)N[C@@H](CO)[C@H](O)c2ccc([N+](=O)[O-])cc2)n1	364.102	-0.149	-6.9	26	2	7	4	8
CHEMBL1835205	NS(=O)(=O)c1ccc(cc1)c2cnnn2[C@@H]3OC[C@@H](O)[C@@H](O)[C@@H]3O	356.079	-1.796	7	24	3	3	4	9
ZINC000242400319	CC(=O)N[C@H]1[C@@H](O)[C@@H](O)[C@@H](CO)O[C@H]1Oc1cc2sc(=O)oc2c(C)c1C	399.099	-0.206	-6.9	27	3	4	4	9
ZINC001501058313	C[C@H](O)[C@H](O)[C@@H](O)[C@@H](O)C=NNc1ccccc1[N+](=O)[O-]	299.112	-0.544	-6.9	21	1	7	5	8
ZINC000036511662	CC(C)(C)[C@@H](NC(=O)OCc1ccccc1)C(=O)OC[C@@H]1O[C@@H](O)[C@@H](O)[C@H](O)[C@@H]1O	427.184	-0.329	-7.5	30	2	6	5	9
ZINC000008653513	N#Cc1cc([N+](=O)[O-])ccc1NC(=O)C(=O)Nc1n[nH]c(N)n1	316.067	-0.256	-7.5	23	2	3	4	8
CHEMBL3407766	CNC(=O)[C@@]12C[C@@H]1[C@H]([C@H](O)[C@@H]2O)n3cnc4c(NC)nc(nc34)C#Cc5ccccc5OC	448.186	0.305	-7.1	33	5	4	4	9
ZINC000257300635	CN[C@H]1CC[C@@](O)(Cn2cnc3c2ncnc3N)[C@H](O)C1	292.165	-0.728	-5.5	21	3	3	4	8
ZINC000004042950	COc1cc(C=O)ccc1O[C@@H]1O[C@H](CO)[C@@H](O)[C@H](O)[C@H]1NC(C)=O	355.127	-1.17	-6.9	25	2	6	4	8
CHEMBL1684164	OC[C@@H]1[C@@H](O)[C@H](O)C[S+]1C[C@H](O)COS(=O)(=O)[O-]	304.029	-3.461	-6.6	18	1	6	4	8
ZINC000059490007	CCCCN(CC)S(=O)(=O)c1cc([N+](=O)[O-])ccc1NNC=C1C(=O)NC(=O)NC1=O	454.127	0.572	-6.7	31	2	10	4	9
CHEMBL519814	Nc1nc(NC(Cc2ccccc2)C(=O)O)c3ncn(CCOCP(=O)(O)O)c3n1	436.126	0.668	-6.6	30	3	10	5	9
CHEMBL2064316	CS(=O)(=O)Nc1ccc2c(ccn2c3ccc(O[C@H]4O[C@H](CO)[C@@H](O)[C@H](O)[C@@H]4O)c(Cl)c3)c1	498.086	0.834	-7.2	33	4	6	5	9
ZINC000106326730	Cc1n[nH]c(=S)n(NC(=O)/C=C\C(=O)Nn2c(=O)c(C)n[nH]c2=S)c1=O	396.042	-1.071	-6.3	26	2	4	4	10
ZINC000014951284	O=c1[nH]cnc2c1ncn2[C@@H]1O[C@@H](COP(=O)(O)O)[C@H](O)[C@H]1O	348.047	-2.152	-7.4	23	3	4	5	9
ZINC000000237789	CC(C)OC[C@@H](O)Cn1c(NN)nc2c1c(=O)[nH]c(=O)n2C	312.155	-1.505	-6.9	22	2	6	4	9
ZINC000037245700	COC(=O)[C@@H]1C/C(=N\NC(N)=S)[C@@H](C(=O)OC)C/C1=N/NC(N)=S	374.083	-1.263	-5.7	24	1	4	4	8
CHEMBL48549	NC(=S)c1cn(O[C@@H]2O[C@H](CO)[C@@H](O)[C@H]2O)c3ncnc(N)c13	341.079	-2.485	-6.7	23	3	4	5	10
CHEMBL3763810	COc1ccc2cc(ccc2c1)C3=NO[C@@]4(C3)O[C@H](CO)[C@@H](O)[C@H](O)[C@H]4O	375.132	0.143	-8.4	27	4	3	4	8
CHEMBL3127451	OC[C@@H](O)[C@H](O)[C@@H](O)CN1C(=O)c2cc(ccc2C3=C1c4ccccc4C3=O)[N+](=O)[O-]	426.106	0.196	-6.5	31	4	6	4	9
CHEMBL237349	NC(=O)c1ccccc1Nc2nc(NCCO)nc(n2)N3CCCC3	343.176	0.718	-7.1	25	3	7	4	8
CHEMBL222001	Nc1ncnc2c1nnn2C3C[C@H](CO)[C@@H](CO)[C@@H]3CO	294.144	-1.426	-6.5	21	3	4	4	9
CHEMBL402195	[Na+].O[C@H]1[C@H](O)[C@H]2[C@@H](NC(=O)c3c(O)c4OCOc4cc23)[C@@H]5OP(=O)([O-])O[C@H]15	409.017	-4.692	-1.2	27	5	0	4	10
CHEMBL3590472	Cn1cc(NC(=O)c2cnn3ccc(N[C@H]4CCCC[C@@H]4N)nc23)c(n1)C(=O)N	397.197	0.496	-8.2	29	4	5	4	9
ZINC000004996195	O=C1c2ccccc2[C@]2(O)Nc3nc4nonc4nc3N[C@]12O	312.061	-0.42	-6.5	23	5	0	4	10
ZINC000005759788	COc1nc(N[C@@H]2O[C@@H](CO)[C@@H](O)[C@@H](O)[C@H]2O)cc(=O)n1C	317.122	-2.999	-7	22	2	4	5	10
CHEMBL116903	OC[C@H]1O[C@H]([C@H](O)[C@@H]1O)n2cnc3c(N[C@@H]4CCC[C@H]4O)ncnc23	351.154	-1.237	-7.2	25	4	4	5	10
CHEMBL3230042	CC(=O)C1=C(O)\C(=C(/O)\Nc2cccc(c2)S(=O)(=O)N)\C(=O)OC1=O	368.031	0	-7.9	25	2	4	4	9
ZINC000252448892	CCN1c2ccccc2/C(=N\O[C@@H]2O[C@H](CO)[C@H](O)[C@@H](O)[C@@H]2NC(C)=O)C1=O	393.154	-1.282	-7.2	28	3	5	4	8
CHEMBL1928049	OC[C@H]1O[C@@H](O[C@@H]2OC=C([C@@H](\C=C\c3ccc[n+](CC(=O)O)c3)[C@H]2C=C)C(=O)[O-])[C@H](O)[C@@H](O)[C@@H]1O	493.158	-2.703	-6	35	3	9	5	10
ZINC000008825936	CNC(=O)NC(=O)[C@@H](C)OC(=O)c1cccnc1S[C@@H](C)C(=O)NC(=O)NC	411.121	0.019	-6.4	28	1	6	4	8
ZINC000003977881	CC(=O)OCC1=C(C(=O)O)N2C(=O)[C@@H](NC(=O)CCC[C@@H](N)C(=O)O)[C@H]2SC1	415.105	-1.13	-6.1	28	2	9	4	8
CHEMBL381408	CNC(=O)[C@H]1S[C@H]([C@H](O)[C@@H]1O)n2cnc3c(NC4CCCC4)nc(Cl)nc23	412.108	0.916	-7.3	27	4	4	4	9
CHEMBL2414827	OC[C@H]1O[C@@H](CNCc2cccc(c2)[N+](=O)[O-])[C@H](O)[C@@H](O)[C@@H]1O	328.127	-1.473	-6.6	23	2	6	5	8
CHEMBL4099837	O[C@H]1[C@H](O)[C@@H](COS(=O)(=O)O)O[C@@H](Oc2ccc(C=O)cc2)[C@@H]1O	364.046	-1.495	-7.6	24	2	6	4	9
CHEMBL50058	CC(C)(CO)CNC(=O)c1cccc(c1)n2nc3nc(N)nc(O)c3n2	357.155	0.247	-7.6	26	3	5	4	9
CHEMBL1967455	Nc1nc(Cl)c(\C=N/O)c(NCC2(CO)CC(=O)C2)n1	299.079	0.274	-6.8	20	2	5	4	8
ZINC000299872874	O=C(OC[C@@H]1O[C@@H](O)[C@@H](O)[C@H](O)[C@H]1O)[C@@H]1CCCN1C(=O)OCc1ccccc1	411.153	-0.869	-7.2	29	3	5	4	9
CHEMBL1645543	CC(C)(C)OC(=O)N1C[C@@H](O)[C@@H](O)[C@H](O)[C@H]1N2C=C(F)C(=O)NC2=O	361.129	-1.492	-5.1	25	2	1	4	8
CHEMBL1160158	CCN1C2CCC1CC(C2)OC(=O)C(CO)c3ccccc3.OC(C(O)C(=O)O)C(=O)O	453.2	0.198	-5.8	32	3	8	5	8
CHEMBL3339246	OC[C@H]1O[C@@H](Oc2ccc(cc2)C(=O)N\N=C\c3ccc(Cl)cc3)[C@H](O)[C@@H](O)[C@@H]1O	436.104	0.283	-7.2	30	3	6	5	8
CHEMBL556107	OC[C@H]1O[C@@H](S\C(=N/O)\c2ccc3ccccc3c2)[C@H](O)[C@@H](O)[C@@H]1O	365.093	0.509	-7.2	25	3	3	5	8
CHEMBL2009700	CNC1C(O)C(NC)C2OC3(O)C(OC(C)CC3=O)OC2C1O	332.158	-2.926	-6.1	23	3	2	5	9
CHEMBL451715	O[C@H]1C=C2[C@@H](NC(=O)c3c(O)c4OCOc4cc23)[C@@H]5OP(=O)(O)O[C@H]15	369.025	-0.125	-7.1	25	5	0	4	8
ZINC000004521728	O=C(O)[C@@H]1O[C@@H](Oc2ccc([N+](=O)[O-])cc2)[C@@H](O)[C@H](O)[C@@H]1O	315.059	-1.134	-7.2	22	2	4	4	8
CHEMBL135430	[Na+].COc1ccc(CC\C(=N/O)\c2c(O)cc(OCC(=O)[O-])cc2O)cc1O	399.093	-2.244	-1.2	28	2	8	4	9
ZINC000104207309	Cc1cc2c3c(c1O)C(=O)/C(C)=C/[C@H](C)[C@H](O)[C@H](O)C(=O)[C@]1(C)CNC(=C(O1)C3=O)C2=O	441.142	0.739	-6.1	32	4	0	4	9
CHEMBL2360260	COCCCNC(=O)c1ccc2sc(nc2c1)C3=C[C@@H](O)[C@@H](O)[C@@H](CO)O3	394.12	0.516	-6.6	27	3	7	4	8
CHEMBL39311	COc1ccc(\C=C(/C)\C(=O)N[C@@H]2[C@H](O)[C@@H](O)[C@H]3OCO[C@H]3[C@@H]2O)cc1O	381.142	-0.873	-6.9	27	3	4	5	8
ZINC000034943226	C/C(=N/OS(=O)(=O)O)S[C@@H]1O[C@@H](CO)[C@@H](O)[C@@H](O)[C@H]1O	333.019	-2.328	-6.8	20	1	4	5	10
CHEMBL1091550	CCN(Cc1ccccc1)c2cn(nn2)[C@@H]3O[C@H](CO)[C@H](O)[C@H](O)[C@H]3O	364.175	-0.723	-7.7	26	3	6	4	9
CHEMBL2237890	OC1(C2N=C(NNC(=O)c3ccccc3)NC(=O)C2=C4CCCN14)N5CCOCC5	412.186	-0.883	-7.3	30	5	2	4	8
ZINC000020464980	COc1cc(NC(=O)NC[C@H]2O[C@@H](CO)[C@@H](O)[C@H]2N(C)CCN(C)C)cc(OC)c1	426.248	-0.192	-6.8	30	2	10	4	8
ZINC000017214681	CN/N=C(C(\O)=N\c1ccc([N+](=O)[O-])cc1[N+](=O)[O-])/[C@H]1NC(=O)N=C1O	365.072	0.715	-8.1	26	2	6	4	8
CHEMBL2374473	OC[C@H](OS(=O)(=O)[O-])[C@H](O)C[Se+]1C[C@@H](O)[C@H](O)[C@H]1CO	381.984	-3.222	-6.9	20	1	7	5	9
CHEMBL2337524	NS(=O)(=O)OC[C@H]1O[C@@H](O)[C@@H](O)[C@@H](O)[C@@H]1O	259.036	-3.994	-7.2	16	1	3	5	8
ZINC000077291204	C[S@@](=O)CCCC/C(=N/O)S[C@@H]1O[C@@H](CO)[C@@H](O)[C@H](O)[C@@H]1O	357.092	-1.144	-6.2	22	1	7	5	9
ZINC000017418528	CN(C)c1nc2c(nc[nH]c2=O)n1[C@H]1O[C@@H](CO)[C@@H](O)[C@@H]1O	311.123	-2.203	-6.9	22	3	3	4	9
ZINC000005640788	O=C1c2ccccc2C(=O)C(O[C@@H]2O[C@@H](CO)[C@@H](O)[C@@H](O)[C@@H]2O)=C1CC=C(Cl)Cl	444.038	0.845	-7.5	29	3	5	4	8
ZINC000004707615	O=[N+]([O-])c1ccc(N[C@@H]2[C@@H](O)O[C@@H](CO)[C@@H](O)[C@H]2O)c([N+](=O)[O-])c1	345.081	-1.285	-6.7	24	2	5	5	10
CHEMBL608658	OC[C@H]1OC([C@H](O)[C@@H]1O)n2c(O)nc3c(c(Cl)c(Cl)cc23)[N+](=O)[O-]	378.997	0.568	-7.3	24	3	3	4	9
CHEMBL112511	C[S+]([O-])C[S+]([O-])C[C@H](CO)NC(=O)\C=C\c1c(C)nc(O)nc1O	377.072	-1.229	-6.1	24	1	8	4	8
ZINC000035112854	O=C1NC=N[C@@H]2[C@H]1N=CN2[C@H]1O[C@@H](COP(=O)(O)O)[C@@H](O)[C@H]1O	350.063	-3.261	-7.8	23	3	4	5	9
ZINC000031841011	O=C(O)[C@@H]1OCCOCCO[C@@H](C(=O)O)[C@@H](C(=O)O)OCCOCCO[C@H]1C(=O)O	440.117	-2.088	-5	30	1	4	4	10
CHEMBL3309436	CCC[C@H]1C[C@@H](N(C)C1)C(=O)N[C@H]([C@@H](C)O)[C@@H]2O[C@H](SC)[C@@H](O)[C@@H](O)[C@@H]2O	406.214	-0.857	-5.6	27	2	7	5	8
CHEMBL3244493	Nc1nc(Cl)nc2c1ncn2[C@@H]3O[C@H](COP(=O)(O)O)[C@@H](O)[C@H]3O	381.024	-1.21	-7.3	24	3	4	5	10
CHEMBL302460	Nc1nc(O)c2nnn(C3CC(CO)C(O)C3O)c2n1	282.108	-2.216	-7	20	3	2	5	10
ZINC000009490922	NC(=O)NC(=O)COC(=O)c1ccc(Oc2ccc(C(=O)OCC(=O)NC(N)=O)cc2)cc1	458.107	0.182	-7.5	33	2	8	4	9
CHEMBL4082769	COc1cc(cc(c1O)[N+](=O)[O-])C(N)P(=O)(O)CC[C@H](N)C(=O)O	363.083	0.339	-6.2	24	1	8	5	8
CHEMBL3229960	CC(=O)C1=C(O)\C(=C(/O)\Nc2ccc(N)c(O)c2)\C(=O)OC1=O	320.064	0.64	-7.5	23	2	3	5	9
CHEMBL1405894	Cl.CCC[C@@H]1C[C@H](N(C)C1)C(=O)N[C@H]([C@@H](C)O)[C@H]2O[C@H](SC)[C@H](O)[C@@H](O)[C@@H]2O	442.19	-0.435	-5.8	28	2	7	5	8
ZINC000104050936	CS(=O)(=O)O[C@H]([C@H](O)CO)[C@H](OS(C)(=O)=O)[C@@H](O)CO	338.034	-3.618	-7	20	0	9	4	10
ZINC000104274049	NS(=O)(=O)c1ccc(NC(=O)[C@@H]2C(=O)N(c3ccc(S(N)(=O)=O)cc3)C(=O)/C2=N/O)cc1	481.036	-1.06	-7.5	32	3	5	4	9
CHEMBL463302	COc1cc2C(CO)N(C)CCc2c(O[C@@H]3O[C@H](CO)[C@@H](O)[C@H](O)[C@H]3O)c1OC	415.184	-1.596	-6.5	29	3	6	5	10
ZINC000101172832	CN(C)[C@@H]1C(O)=C(C(N)=O)C(=O)C2=C(O)[C@H]3C(=O)c4c(O)cccc4[C@@](C)(O)[C@@H]3C[C@H]21	428.158	0.671	-5.9	31	4	2	5	8
CHEMBL374061	CCN(CC)c1nc(nc(n1)N2C[C@H](N)C[C@H](N)C2)N3C[C@H](N)C[C@H](N)C3	378.297	-1.553	-5.9	27	3	5	4	10
CHEMBL2313364	CCC(C)[C@H]1NC(=O)[C@H]2CSSCC\C=C\[C@H](CC(=O)N[C@H](C)C(=O)N2)OC(=O)C[C@@H]1O	487.181	0.915	-5.7	32	2	2	4	8
CHEMBL4102645	COCOCCOCC(=O)NC[C@@H]1N[C@H](CO)[C@H](O)[C@@H]1O	308.158	-3.206	-6.6	21	1	10	5	8
CHEMBL569592	Nc1nc(F)nc2c1ncn2[C@@H]3O[C@H](CSCCO)[C@@H](O)[C@H]3O	345.091	-1.108	-7	23	3	5	4	10
CHEMBL215381	O[C@H]1[C@@H](O)[C@@H](O[C@@H]1COP(=O)(O)O)N2C=CC(=O)N(CC(=O)c3ccccc3)C2=O	442.078	-1.379	-7.2	30	3	7	4	10
CHEMBL472988	Cc1c(nnn1Cc2ccccc2)C(=O)O[C@H]3[C@H](O)[C@H](O)CO[C@]3(O)CO	379.138	-1.407	-7.2	27	3	5	4	10
CHEMBL91581	CN(C1CN=C(Nc2ccc3ccccc3n2)NC1=O)C(=O)C[C@@H](N)CCCCN.CC(=O)O	471.259	0.897	-3.7	34	3	8	5	8
CHEMBL2035865	CC(C)[C@H](NC(=O)C[C@@H](N)C1O[C@@H]2OC(C)(C)O[C@@H]2[C@H]1O)C(=O)N[C@@H](C)C(=O)O	417.211	-1.329	-7.2	29	2	8	5	8
CHEMBL607601	NC(=S)c1ncn(n1)C2O[C@H](COS(=O)(=O)N)[C@@H](O)[C@H]2O	339.031	-3.248	-7.9	21	2	5	4	10
CHEMBL3966464	Cc1nn(C)c(C)c1CNc2nc(NC3CC3)n4ncc(\C=C\5/NC(=O)NC5=O)c4n2	422.193	0.841	-7.4	31	5	6	4	10
ZINC000031501431	CN(CCC[C@H](O[C@@H]1O[C@H](C(=O)O)[C@@H](O)[C@H](O)[C@H]1O)c1cccnc1)N=O	385.149	-0.575	-6.6	27	2	9	4	9
ZINC000013435042	Nc1ccn([C@@H]2C[C@H](O)[C@H](CO[P@](=O)(O)OP(=O)(O)O)O2)c(=O)n1	387.023	-1.3	-7.2	24	2	6	5	10
CHEMBL1911636	OC[C@H]1O[C@H]([C@H](O)[C@H](C#N)[C@@H]1O)N2C=C(F)C(=NC2=O)O	301.071	-2.161	-7.3	21	2	2	4	9
CHEMBL3763848	COCCNS(=O)(=O)c1ccc(N\N=C\c2ccc(O)c(O)c2)nc1	366.1	0.863	-8.5	25	2	8	4	8
ZINC000005544397	O=C1NC(=S)NC(=O)C1=CNNc1ccc([N+](=O)[O-])cc1[N+](=O)[O-]	352.023	-0.166	-7.5	24	2	5	4	9
CHEMBL1183999	CN(C1CN=C(NC(=O)N)NC1=O)C(=O)C[C@@H](N)c2csc(CN)n2	368.138	-2.027	-6.9	25	2	5	5	8
CHEMBL49149	O[C@@H]1[C@@H](O)[C@H]2OCO[C@H]2[C@H](O)[C@@H]1NC(=O)C3=Cc4cc(O)c(OCC=C)cc4C3	405.142	-0.781	-7.6	29	4	5	5	8
CHEMBL3931188	O=C(N1CCNC(=O)C1)c2ccc(s2)c3cc(NC4CC4)n5ncc(\C=C\6/NC(=O)NC6=O)c5n3	492.133	0.784	-8.3	35	6	5	4	9
CHEMBL1965790	O\N=C/1\C(\S\C(\C(\S1)=N\O)=N/O)=N\O	235.967	0.617	-7.3	14	1	0	4	10
CHEMBL3287015	CC(C)[C@H](NC(=O)c1csc(n1)c2cscn2)C(=O)NCC(=O)NO	383.072	0.643	-7.7	25	2	7	4	8
CHEMBL2369013	NC1=NC(=O)N(C=C1)[C@@H]2O[C@H](COP(=O)(O)OP(=O)(O)O)[C@@H](O)C2=C	399.023	-1.134	-8.4	25	2	6	5	10
ZINC001560410206	C=CC1=C(C(=O)O)N2C([O])=C(NC(=O)C(=NO)c3csc(N)n3)[C@H]2SC1	394.028	0.533	-6.6	26	3	5	4	9
ZINC000077287068	CC1=C(C(=O)O)N2C(=O)[C@@H](NC(=O)/C(=N\OCC(=O)O)c3csc(N)n3)[C@H]2SC1	441.041	-0.711	-6.3	29	3	7	4	10
CHEMBL1990256	OCC1OC(C(O)C(O)C1O)N2C(=C(C#N)C(=C(C#N)C2=S)c3ccccc3)O	415.084	0.306	-5.5	29	3	3	5	10
ZINC000021981415	CN(C)C[C@H](c1ccc(O[C@@H]2O[C@H](C(=O)O)[C@@H](O)[C@H](O)[C@H]2O)cc1)C1(O)CCCCC1	439.221	0.298	-7.3	31	3	7	5	8
CHEMBL3125424	COc1cc(O)cc2C(=O)C3=C([C@H](O)[C@@H](O)[C@@](C)(O)[C@H]3O)C(=O)c12	336.085	-1.076	-6	24	3	1	5	8
CHEMBL359949	Nc1nn2c(O)cc(CNNCCO)nc2c1[N+](=O)[O-]	283.103	-1.488	-7.1	20	2	6	5	10
CHEMBL609642	CNC(=O)[C@H]1OC([C@H](O)[C@@H]1O)n2cnc3c(NCc4ccc(Br)cc4)ncnc23	462.065	0.566	-8.1	29	4	5	4	9
CHEMBL1201314	CC(C)[C@H](N)C(=O)OCC(CO)OCn1cnc2C(=O)NC(=Nc12)N	354.165	-1.437	-6.7	25	2	8	4	10
ZINC000016136382	O=C(O)c1nonc1NCNc1nonc1C(=O)O	270.035	-0.67	-8.4	19	2	6	4	10
CHEMBL562609	NC(=N)NCCNC1=NC(=O)N(Cc2ccc(F)cc2)C(=O)N1Cc3ccc(cc3)[N+](=O)[O-]	456.167	0.444	-7	33	3	9	4	9
CHEMBL3092404	OC[C@H]1O[C@H](CC(=O)Nc2nc3ccccc3s2)[C@@H](O)[C@@H](O)[C@@H]1O	354.089	-0.533	-8	24	3	4	5	8
CHEMBL3934710	O[C@H]1CCN(C1)c2cc(NC3CC3)n4ncc(\C=C\5/NC(=O)NC5=O)c4n2	369.155	0.055	-7.2	27	5	4	4	8
ZINC000004921546	NC(=S)N/N=C\Cn1ccc(=O)n(C/C=N\NC(N)=S)c1=O	342.068	-2.352	-6.6	22	1	6	4	8
ZINC000016428629	Nc1nonc1/C(=N/O)NCCNc1ccc([N+](=O)[O-])cc1	307.103	0.397	-8.3	22	2	6	4	9
ZINC000104204288	C/C(Cl)=C\CNc1ncnc2c1ncn2[C@H]1O[C@@H](CO)[C@@H](O)[C@H]1O	355.105	-0.008	-6.9	24	3	5	4	9
ZINC000004878481	O=c1nc2n(C[C@@H](O)[C@@H](O)[C@H](O)CO)c3ccccc3cc-2c(=O)[nH]1	347.112	-1.735	-6.3	25	3	5	5	8
CHEMBL1277776	Cl.CS(=O)(=O)CC[C@H](N)C(=O)N[C@H](CO)[C@@H](O)c1ccc(cc1)[N+](=O)[O-]	411.087	-0.711	-7.2	26	1	9	4	8
ZINC000005105274	CC(C)=CCNc1ncnc2c1c(C#N)cn2[C@@H]1O[C@@H](CO)[C@@H](O)[C@@H]1O	359.159	0.293	-6.9	26	3	5	4	9
CHEMBL1392553	CN(C)CCCNc1nc(N)c(c(NCCO)n1)[N+](=O)[O-]	299.171	-0.265	-7	21	1	9	4	9
CHEMBL3544518	CC(C#N)c1cc(cc(c1)C(C)(C)C#N)C(=O)OC2O[C@@H]([C@@H](O)[C@H](O)[C@H]2O)C(=O)O	418.138	0.164	-7.6	30	2	5	4	9
ZINC000009703593	CSc1nc(N[C@@H]2OC[C@@H](O)[C@@H](O)[C@@H]2O)c(C=O)c(=O)[nH]1	317.068	-1.845	-7.2	21	2	4	5	9
ZINC000100660000	O=C1C(NCCO)=C(N2CC2)C(=O)C(NCCO)=C1N1CC1	308.148	-2.644	-6.3	22	3	8	4	8
CHEMBL3343912	CC(C)[C@H]1C[C@H]2O[C@@]2(C)[C@@H](O)[C@H]1O[C@@H]3O[C@H](CO)[C@@H](O)[C@H](O)[C@H]3O	348.178	-1.634	-6.6	24	3	4	5	8
CHEMBL417064	OC1CC(OC(COP(=O)(O)O)C1O)N2C=CC(=O)NC2=O	338.052	-2.345	-7.6	22	2	4	5	8
CHEMBL573885	CC1(C)CC(=O)C2=C(C1)N=C3NN=C([C@H](O)[C@@H](O)[C@H](O)CO)N3C2c4ccc(Cl)cc4	448.151	0.688	-5.1	31	4	5	5	9
ZINC000015290514	CN(C)[C@@H]1C(O)=C(C(N)=O)C(=O)[C@@]2(O)C(=O)C3=C(C[C@@H]12)[C@](C)(O)c1c(Cl)ccc(O)c1C3=O	476.099	-0.124	-1.2	33	4	2	5	9
CHEMBL1605	Nc1nc(cs1)\C(=C\CC(=O)O)\C(=O)N[C@H]2[C@H]3SCC=C(N3C2=O)C(=O)O	410.035	-0.048	-6	27	3	6	4	8
ZINC000018058325	Cc1cc(C)nc(NS(=O)(=O)c2ccc(NC=C3C(=O)NC(=S)NC3=O)cc2)n1	432.067	0.721	-7.8	29	3	5	4	8
CHEMBL2111976	NC1=NC(=O)N(C=C1)[C@H]2C[C@H](CO)C(CO)(CO)O2	271.117	-1.924	-6.4	19	2	4	4	8
ZINC000253389439	C=C[C@@H]1[C@H]2C[C@@H]3c4[nH]c5ccccc5c4CCN3C(=O)C2=CO[C@H]1O[C@@H]1O[C@H](CO)[C@@H](O)[C@H](O)[C@H]1O	498.2	0.472	-2.8	36	6	4	5	8
CHEMBL1159528	O[C@H]1[C@H](O)[C@@H](Oc2ccc(cc2)N3CCCC(=O)N3)O[C@H]([C@@H]1O)C(=O)O	368.122	-1.411	-8.3	26	3	4	5	8
CHEMBL1080328	C[C@@H](NC(=O)[C@@]1(C)COC(=N1)c2cn(C)c3cc(Cl)cc(O)c23)C(=O)N[C@@H](CO)C(=O)O	466.126	0.139	-6.6	32	3	7	5	8
CHEMBL609948	OC[C@H]1OC([C@H](O)[C@@H]1O)n2cnc3c(NCc4ccccn4)ncnc23	358.139	-0.555	-7.9	26	4	5	4	10
ZINC000008814450	CC[C@H](Sc1nc(N)cc(N)n1)C(=O)Nc1ccc(S(N)(=O)=O)cc1	382.088	0.798	-7.2	25	2	6	4	8
CHEMBL3403438	Cn1c(nc2ccccc12)c3cnc(N)nc3N[C@@H]4C[C@H](CO)[C@@H](O)[C@H]4O	370.175	0.127	-5.9	27	4	4	5	9
CHEMBL1207655	NC(=O)c1cc(NC(=O)c2nnn[nH]2)cc(NC(=O)c3nnn[nH]3)c1	343.089	-1.684	-8.4	25	3	5	5	9
CHEMBL562508	COc1ccc(CN2C(=NC(=O)N(Cc3ccc(cc3)C#N)C2=O)NCCNC(=N)N)cc1	448.197	0.277	-7.1	33	3	9	4	9
CHEMBL3941273	CNC(=O)c1cccc(CNc2nc(NC3CC3)n4ncc(\C=C\5/NC(=O)NC5=O)c4n2)c1	447.177	0.851	-8.1	33	5	7	5	9
CHEMBL2018064	Nc1ncc(c(N[C@@H]2C[C@H](CO)[C@@H](O)[C@H]2O)n1)c3nc4ccccc4s3	373.121	0.85	-6.4	26	4	4	5	9
ZINC000035271762	C=C[C@]1(C)C[C@@H](OC(=O)C(=C)[C@H](O)CO)[C@H](C(=C)C(=O)OC)[C@H](O)[C@@H]1C(=C)CO	410.194	0.275	-5.2	29	1	9	4	8
CHEMBL1812062	CC(C)Oc1nc(N)nc2c1ncn2[C@@H]3O[C@H](COP(=O)(O)O)[C@@H](O)[C@@]3(C)F	421.116	0.291	-7.2	28	3	6	4	10
ZINC000008048267	O=C(Cc1cscn1)c1ccc(O[C@@H]2O[C@@H](CO)[C@@H](O)[C@@H](O)[C@H]2O)cc1O	397.083	-0.547	-7.5	27	3	6	5	10
CHEMBL596924	COC(=O)[C@@]1(O)C[C@@H](O)[C@H](O)[C@@H](C1)OC(=O)\C=C\c2ccc(O)c(O)c2	368.111	-0.558	-7.7	26	2	4	5	9
ZINC000041121518	CNC(=O)c1nn(C)cc1Nc1ncnc2c1NC(=O)CN2	302.124	-0.323	-8.6	22	3	3	4	8
CHEMBL1192732	Cn1cc(NC(=O)c2cc(NC(=O)Cn3ccnc3[N+](=O)[O-])cn2C)cc1C(=O)NCCC(=N)N	484.193	0.415	-7.9	35	3	10	5	10
ZINC000008651761	C[C@H]1O[C@@H](Sc2ncnc3[nH]cnc32)[C@@H](O)[C@@H](O)[C@H]1O	298.074	-0.728	-6.6	20	3	2	4	8
CHEMBL3278577	CCCO[C@@H]1O[C@H](CO)[C@@H](O)[C@H](O)[C@H]1NC(=O)N(C)N=O	307.138	-1.457	-6.9	21	1	6	4	8
ZINC000017312810	Nc1nc2[nH]c(/N=N/SCCO)nc2c(=O)[nH]1	255.054	-0.047	-7.5	17	2	4	4	8
CHEMBL3215983	Cl.Cl.CN(C1CN=C(Nc2ncccn2)NC1=O)C(=O)C[C@@H](N)CCCCN	434.171	-0.109	-7.6	28	2	8	4	8
CHEMBL605022	C[C@H]1OC([C@H](O)[C@@H]1O)n2cnc3c(nc(N)nc23)S(=O)(=O)N	330.075	-2.305	-7.4	22	3	2	4	10
CHEMBL1185193	NC1=NC(=O)N(C=C1F)[C@@H]2C[C@H](COP(=O)(O)OP(=O)(O)OP(=O)(O)O)C2	452.99	0.259	-7.2	27	2	8	5	10
CHEMBL2058208	CN1CCN(CC1)C(=O)c2cccc(c2)c3ccc(O[C@H]4O[C@H](CO)[C@@H](O)[C@H](O)[C@@H]4O)cc3	458.205	-0.08	-7.6	33	4	5	4	8
ZINC000095117211	NNS(=O)(=O)c1ccc2c(c1)oc(=O)c1cc(S(=O)(=O)NN)ccc21	384.02	-0.75	-6.3	25	3	4	4	8
ZINC000008651709	COC(=O)[C@@H]1O[C@@H](Sc2ncnc3[nH]cnc32)[C@@H](O)[C@@H](O)[C@H]1O	342.063	-1.574	-8.1	23	3	3	4	10
ZINC000252516086	Cc1c2c(c(O)c3c(O)cccc13)C(=O)O[C@@H]2[C@@H]1C(=O)[C@H](O)C(C(N)=O)=C(O)[C@@H]1N(C)C	442.138	0.558	-4.3	32	4	3	5	9
CHEMBL1983658	OC[C@@H](O)[C@H](O)[C@@H](O)\C=N\Nc1ccc(Cl)nn1	276.063	-1.397	-7.1	18	1	6	5	8
ZINC000005822533	Nc1nc(SCCSc2n[nH]c(N)n2)n[nH]1	258.047	-0.028	-6.4	16	2	5	4	8
ZINC000002716154	O=c1oc2cc(S(=O)(=O)NCCO)ccc2c2ccc(S(=O)(=O)NCCO)cc12	442.05	-0.513	-6.5	29	3	8	4	8
CHEMBL4105519	Nc1ncn(n1)C(=O)Nc2ccc(NC(=O)n3cnc(N)n3)cc2	328.114	0.194	-4.9	24	3	2	4	10
CHEMBL3633550	Nc1c(cnn1c2ccc(cc2)S(=O)(=O)N)C(=O)N\N=C\3/C(=O)Nc4ccc(Cl)cc34	459.052	0.842	-5.3	31	4	4	4	8
CHEMBL288268	Nc1nc(O)c2ncn(COCCNCCO)c2n1	268.128	-1.33	-7.4	19	2	7	4	9
CHEMBL3229985	CC(=O)C1=C(O)\C(=C(/O)\Nc2cccc(NS(=O)(=O)C)c2)\C(=O)OC1=O	382.047	0.724	-7.5	26	2	5	4	9
ZINC000006828397	Nn1cnnc1N/N=C/c1cc(Br)c(O)cc1O	311.997	0.612	-6.8	18	2	3	4	8
CHEMBL3144040	CN1N=C([C@@H]2O[C@H](CO)[C@@H](O)[C@H]2O)C(=O)C1C(=O)N	273.096	-3.808	-6.9	19	2	3	4	8
ZINC000005339558	O=[N+]([O-])c1ccc(S[C@H]2O[C@@H](CO)[C@@H](O)[C@@H](O)[C@@H]2O)c([N+](=O)[O-])c1	362.042	-0.605	-6.8	24	2	5	4	10
ZINC000253535231	Nc1nnc(CCC(=O)N[C@H](Cc2ccncc2)[C@H]2C[C@@H](O)C2)c(O)n1	358.175	-0.015	-7.3	26	3	7	4	8
CHEMBL327578	ONC(=O)[C@H]1[C@@H](O)[C@H](O)[C@@H](O)CN1S(=O)(=O)c2ccc(OC3CCCCC3)cc2	430.141	-0.641	-7.4	29	3	5	5	8
ZINC000248051546	CN(C[C@H](O)[C@H](O)[C@@H](O)[C@@H](O)CO)c1ccnc2ncnn21	313.139	-3.004	-6	22	2	7	5	10
ZINC000009871302	C[C@]1(c2cccc(-n3cnnn3)c2)NC(=O)N(CC(=O)Nc2ccc3[nH]c(=O)[nH]c3c2)C1=O	447.14	0.238	-8.2	33	5	5	4	8
CHEMBL607686	CCNc1ncnc2c1ncn2C3O[C@H](CO)[C@@H](O)[C@@]3(C)O	309.144	-0.74	-6.8	22	3	4	4	9
ZINC000003780800	CC(=O)[C@]1(N)Cc2c(O)c3c(c(O)c2[C@@H](O[C@H]2C[C@H](O)[C@H](O)CO2)C1)C(=O)c1ccccc1C3=O	483.153	0.632	-6.4	35	5	3	5	10
CHEMBL3805644	COC(=O)[C@H](CCSC)NC(=O)CNc1nc(NC(=O)C)nc2[nH]cnc12	395.138	0.134	-7	27	2	9	4	9
CHEMBL417886	C\C(=C/c1ccc(OCc2cccs2)c(O)c1)\C(=O)N[C@@H]3[C@H](O)[C@@H](O)[C@H]4OCO[C@H]4[C@@H]3O	463.13	0.759	-6.4	32	4	6	5	9
ZINC000257347238	O=C(/C=C/c1ccc([N+](=O)[O-])cc1)c1c(O)cccc1O[C@H]1O[C@H](CO)[C@H](O)[C@@H](O)[C@H]1O	447.117	0.375	-7	32	3	7	5	10
CHEMBL3248269	CC(=O)C1=C(O)\C(=C(/C)\Nc2ccc(O)c(NS(=O)(=O)C)c2)\C(=O)OC1=O	396.063	0.934	-7.6	27	2	5	4	9
CHEMBL3797947	CCC(=C)C(=O)c1ccc(OCC(=O)N[C@H]2[C@H](O)O[C@H](CO)[C@@H](O)[C@@H]2O)c(Cl)c1Cl	463.08	0.437	-6.8	30	2	8	5	8
CHEMBL368123	OC1COC2(O)C1OC(=O)C2(O)Cc3cc(O)c(O)c(Br)c3Br	453.89	-0.098	-6.5	23	3	2	5	8
ZINC000008665445	CC(/C=N/NC1=NCCCN1)=N/NC1=NCCCN1	264.181	-0.774	-6.4	19	2	3	4	8
CHEMBL139419	C[C@@H](O)[C@@H]1[C@H]2[C@@H](C)C(=C(N2C1=O)C(=O)O)S[C@@H]3CN[C@@H](C3)C(=O)N4CC(C(=O)O)\C(=N\O)\C4	482.147	-1.023	-6.6	33	4	6	5	9
CHEMBL3892541	Nc1ncnc(N2CCC(N)(CC2)C(=O)N[C@@H](CCO)c3ccncc3)c1Cl	405.168	0.645	-5.7	28	3	6	4	8
CHEMBL3544522	O[C@H]1C(ON2C(=O)NC(C2=O)(c3ccccc3)c4ccccc4)O[C@@H]([C@@H](O)[C@@H]1O)C(=O)O	444.117	-0.694	-7.2	32	4	5	5	8
ZINC000014586321	O=C(OC[C@H](O)[C@H](O)[C@@H](O)[C@@H](O)COC(=O)c1ccccc1)c1ccccc1	390.131	0.144	-8	28	2	9	4	8
ZINC000002316003	O=C(O)CNc1nc(NCC(=O)O)nc(N2CCOCC2)n1	312.118	-1.299	-7.5	22	2	7	4	9
CHEMBL244489	NNC(=O)CSc1nnc(Cc2csc(NC(=O)CCl)n2)n1NC(=O)c3ccccc3	480.055	0.969	-6.9	31	3	9	4	10
CHEMBL3144303	Nc1ncnc2c1ncn2[C@H]3C[C@H](OP(=O)(O)O)[C@@H](COCP(=O)(O)O)O3	425.05	-0.674	-7.4	27	3	7	5	10
CHEMBL2064314	[Na+].OC[C@H]1O[C@H](Oc2ccc(cc2Cl)n3ccc4cc(ccc34)C(=O)[O-])[C@@H](O)[C@@H](O)[C@@H]1O	471.07	-3.17	-1.2	32	4	5	4	9
ZINC001570001717	C[C@H]1O[C@](O)(O[n+]2cccc([C@@H]3C[C@@H](O)C(=O)N3C)c2)[C@H](O)[C@@H](O)[C@@H]1O	371.145	-3.186	-6.9	26	3	3	5	8
ZINC000004922498	CCNC(=O)NC(=O)[C@H](Sc1nc(N)nc(N)n1)c1ccccc1	347.116	0.715	-6.6	24	2	5	4	8
ZINC000005812406	CSCC[C@@H](C(=O)O)N(C[C@]1(O)OC[C@@H](O)[C@@H](O)[C@H]1O)N=O	340.094	-2.022	-6.5	22	1	8	5	9
CHEMBL3589831	OC[C@H]1O[C@@H](Oc2ccc(NC(=O)CN=[N+]=[N-])cc2)[C@H](O)[C@@H](O)[C@H]1O	354.118	-0.886	-6.3	25	2	6	5	8
CHEMBL2028322	[Na+].NCC(=O)Nc1ccc(c2cc(cc(c12)S(=O)(=O)O)S(=O)(=O)[O-])S(=O)(=O)O	461.947	-3.861	-1.2	28	2	5	4	9
CHEMBL422316	Nc1nc(N)c2cc3CN(Cc4ccc(cc4)C(=O)N[C@@H](CCC(=O)O)C(=O)O)CCc3nc2n1	479.192	0.795	-7.4	35	4	8	5	9
CHEMBL304179	Nc1ncnc(N[C@@H]2O[C@H](CO)[C@@H](O)[C@H]2O)c1[N+](=O)[O-]	287.087	-2.182	-6.8	20	2	4	5	10
CHEMBL3805395	COC(=O)[C@@H](NC(=O)CNc1nc(NC(=O)C)nc2[nH]cnc12)C(C)C	363.166	0.037	-7.4	26	2	7	4	8
CHEMBL515014	O[C@H]1[C@@H](O)[C@@H]2NC(=O)c3c(O)c4OCOc4cc3[C@H]2[C@@H](OC(=O)c5ccccc5)[C@@H]1O	429.106	-0.362	-5.9	31	5	2	5	9
ZINC000038819453	Nc1nc(O[C@@H]2O[C@H](C(=O)O)[C@@H](O)[C@H](O)[C@H]2O)ncc1F	305.066	-2.531	-7.6	21	2	3	5	9
ZINC000005819397	Nc1ncn(C[C@H](O)CO)c2nc(S)nc1-2	241.063	-0.998	-7.1	16	2	3	4	8
CHEMBL3144197	COC(=O)c1ccc(cc1)C2=CN([C@H]3C[C@H](O)[C@@H](COP(=O)(O)O)O3)C(=O)NC2=O	442.078	-0.252	-8	30	3	6	4	9
CHEMBL3228480	OC[C@@H]1OC(O)[C@@H](NC(=O)N(CCCl)N=O)[C@H](O)[C@H]1O	313.068	-2.282	-6.5	20	1	5	5	8
ZINC000238899981	CCOC(=O)c1nc(-c2ccccc2)oc1N(C)C[C@H](O)[C@H](O)[C@@H](O)[C@H](O)CO	410.169	-0.61	-6.9	29	2	10	5	10
ZINC000068604830	C[C@@H]1CCN(CC(=O)O)CCN(CC(=O)O)[C@H](C)CCN(CC(=O)O)CCN1CC(=O)O	460.253	-0.896	-4.6	32	1	8	4	8
ZINC000005201828	COC(=O)[C@@H](O)[C@@H](O)[C@H](O)[C@H](O)C(=O)OC	238.069	-3.224	-6.5	16	0	5	4	8
ZINC000252383336	O=C(O)CN1C(=O)N[C@@H]2O[C@H]([C@@H]3O[C@@H]4NC(=O)N(CC(=O)O)[C@H]4O3)O[C@@H]21	374.071	-2.744	-8	26	4	5	4	8
ZINC000827847787	Cc1nc(C)c(CC(=O)NCCc2nc(N)cc(O)n2)c(O)n1	318.144	-0.222	-8.2	23	2	5	4	8
CHEMBL1797670	COc1c(O)cc(\C=C\C(=O)C[C@@H]2O[C@H](CO)[C@H](O)[C@H](O)[C@H]2O)cc1[N+](=O)[O-]	399.117	-0.876	-7.1	28	2	7	5	10
ZINC000031161561	CC/C=C/[C@H](O)[C@H](O)C1=C(C)C(=O)[C@]2(O1)C(=O)N[C@](OC)(C(=O)c1ccccc1)[C@@H]2O	431.158	0.003	-6.5	31	3	7	4	8
CHEMBL22155	Nc1nc(O)c2ncn(CS(=O)(=O)C(CO)CO)c2n1	303.064	-2.16	-6.8	20	2	5	4	10
CHEMBL1169883	OC[C@H]1O[C@H](Oc2ccc(cc2)c3ccc(cc3)[N+](=O)[O-])[C@@H](O)[C@@H](O)[C@@H]1O	377.111	0.44	-7.2	27	3	5	4	8
CHEMBL1443447	O.Cl.CN[C@@H]1[C@H](O)[C@H](NC)[C@H]2O[C@]3(O)[C@@H](O[C@H](C)CC3=O)O[C@@H]2[C@H]1O	386.146	-3.328	-1.7	25	3	2	5	9
CHEMBL1091856	OC(CCCCOc1nonc1S(=O)(=O)c2ccccc2)(P(=O)(O)O)P(=O)(O)O	472.011	0.453	-7.8	29	2	10	5	9
ZINC000038599450	CC(=O)N[C@H]1/C(=N/OC(=O)Nc2ccccc2)O[C@H](CO)[C@@H](O)[C@@H]1O	353.122	-0.834	-7.7	25	2	4	5	8
CHEMBL2111212	Nc1nc(N)c2ncn(\C=C/3\CC3(CO)CO)c2n1	262.118	-0.794	-6.1	19	3	3	4	8
CHEMBL293263	Nc1nc(N)c2nc(CCc3ccc(cc3)C(=O)N[C@@H](CCC(=O)O)C(=O)O)cnc2n1	439.16	0.417	-7.5	32	3	9	5	9
CHEMBL3288835	COC(=O)[C@@H](CO)NC1=C(C(=O)NCc2ccc(F)cc2F)C(=O)N(O)c3ncccc13	448.119	0.788	-7	32	3	7	4	9
CHEMBL1488561	NNC(=O)CS(=O)(=O)CS(=O)(=O)CC(=O)NN	288.02	-4.247	-7.3	17	0	6	4	8
ZINC000252430978	C[C@H]1[C@H](NC(=O)C(=NOC(C)(C)C(=O)O)c2csc(N)n2)C(=O)N1S(=O)(=O)O	435.052	-1.172	-7.1	28	2	7	4	10
ZINC000004114228	C[C@H](O)[C@H](O)[C@H]1CNc2nc(N)[nH]c(=O)c2N1C(=O)c1cccnc1	346.139	-1.07	-7.4	25	3	3	5	8
CHEMBL3938317	CC1CC(Nc2nccc(N[C@@H]3C[C@H](COS(=O)(=O)N)[C@@H](O)[C@H]3O)n2)c4ccccc14	449.173	0.879	-8.2	31	4	7	5	9
CHEMBL3246743	CNCC(O)COC(=O)c1ccc2OCOc2c1.OC(=O)C(=O)O	343.09	-0.692	-4.5	24	2	5	4	8
ZINC000031291573	Cc1cc(CC(=O)O[C@@H]2O[C@H](C(=O)O)[C@@H](O)[C@H](O)[C@H]2O)n(C)c1C(=O)c1ccc(Cl)cc1	467.098	0.196	-8	32	3	6	4	9
CHEMBL3326444	CON(CC1=CC[C@H](CC1)C(=C)C)[C@@H]2O[C@H](CO)[C@@H](O)[C@H](O)[C@H]2NC(=O)N(C)N=O	428.227	0.283	-5.6	30	2	8	4	9
CHEMBL488510	OC(=O)C(F)(F)F.[O-][n+]1onc(CNC(C2CCNCC2)c3c[nH]cn3)c1C#N	417.137	0.367	-5.2	29	3	5	4	8
CHEMBL431649	CNc1nc(Cl)nc2c1ncn2C3CC3(COP(=O)(O)O)COP(=O)(O)O	443.016	0.671	-7.3	27	3	8	5	9
CHEMBL1852234	CC(=O)c1c(C)onc1c2nc(c[nH]2)[C@@H](O)[C@H](O)[C@H](O)CO	311.112	-0.677	-7.1	22	2	6	5	8
ZINC000100299950	O=S(=O)(O)c1ccc2c(c1)[C@@H](S(=O)(=O)O)CC(=N\O)/C2=N/O	349.988	0.274	-7.8	22	2	2	4	8
CHEMBL2348400	OC[C@H]1O[C@@H](Oc2cccc3OC(=O)Nc23)[C@H](O)[C@@H](O)[C@@H]1O	313.08	-1.7	-6.7	22	3	3	5	8
ZINC000426435386	Cc1cc(O)nc(NCCNC(=O)NCc2noc(C(C)C)n2)n1	335.171	0.908	-8.3	24	2	7	4	8
CHEMBL2107529	OC[C@@H]1O[C@H](O[C@]2(CCl)O[C@H](CCl)[C@@H](O)[C@@H]2O)[C@@H](O)[C@@H](O)[C@H]1Cl	396.015	-1.656	-5.2	23	2	5	5	8
CHEMBL512334	Nc1nc(N)nc(NCCCC(N)(C(F)F)C(=O)O)n1	291.126	-0.725	-7.2	20	1	7	5	8
CHEMBL388019	CNS(=O)(=O)NC\C(=N/OC)\[C@@H]1C[C@@H](CN1)SC2=C(N3[C@H]([C@H]2C)[C@@H]([C@@H](C)O)C3=O)C(=O)O	491.151	-1.34	-5.1	32	3	10	5	9
CHEMBL1683323	O[C@@H]1[C@@H](COP(=O)(O)O)O[C@H]([C@@H]1O)n2cc(nn2)c3ccccc3F	375.063	-0.187	-8.5	25	3	5	4	8
CHEMBL1536870	SC1=NCCOCCOCCOCCN=C(S)NCCOCCOCCOCCN1	468.208	-0.15	-5.9	30	1	0	4	10
CHEMBL3142639	NC1=CS(=O)(=O)O[C@@]12[C@@H](O)[C@@H](O[C@@H]2CO)N3C=CC(=O)NC3=O	347.042	-3.314	-6.6	23	3	2	4	10
CHEMBL17916	CC(C)(C)NCC(O)COc1nsnc1N(CCO)CC(=O)O	348.147	-0.451	-6.8	23	1	10	4	9
ZINC000001642639	Nc1nc2cc3nc(N)c(N)nc3cc2nc1N	242.103	-0.098	-7.1	18	3	0	4	8
ZINC000001580560	NNc1ccc(-n2ncc(C(N)=O)c2N)nn1	234.098	-1.371	-7.2	17	2	3	4	8
ZINC000005853888	CCNc1nc(NC(C)C)nc(SC[C@H](NC(C)=O)C(=O)O)n1	342.147	0.805	-7	23	1	9	4	8
ZINC000004028130	O=c1[nH]c(O)nc2nc(N/N=C/c3ccc(O)cc3)nnc12	299.077	-0.035	-9	22	3	3	4	9
CHEMBL497522	CO[C@@]1(CC(=C)[C@@H](C)[C@@H](C)O1)[C@H](O)C(=O)N[C@H]2OCO[C@@H]3[C@@H](O)C(C)(C)[C@@H](C[C@H](O)CO)O[C@H]23	489.257	-0.596	-6.2	34	3	7	5	10
CHEMBL3144009	OC[C@H]1O[C@H]([C@H](O)[C@@H]1O)C2=NNC3C(=S)N=CN=C23	284.058	-2.394	-6.8	19	3	2	4	8
ZINC000022012807	C#CC[C@@](Cc1cnc2nc(N)nc(N)c2n1)(C(=O)O)c1ccc(C(=O)O)cc1	392.123	0.871	-6.6	29	3	6	4	8
ZINC000033707739	Cc1cc(=O)oc2cc(O[C@@H]3O[C@@H](COS(=O)(=O)O)[C@@H](O)[C@@H](O)[C@H]3O)ccc12	418.057	-0.893	-8.8	28	3	5	4	10
CHEMBL60095	COC12[C@@H](COC(=O)N)C3=C(N1C[C@H]4N[C@@H]24)C(=C(C)\C(=N/CCN)\C3=O)O	377.17	-1.221	-5.4	27	4	5	4	9
CHEMBL391279	CNC(=O)[C@]12CN[C@H]([C@@H]1O)[C@@H](O2)n3cnc4c(N)ncnc34	305.124	-2.245	-8.3	22	4	2	4	9
CHEMBL2398604	OC[C@H]1O[C@H](Nc2ncc(s2)C(=O)c3ccc(cc3)C#N)[C@@H](O)[C@@H](O)[C@@H]1O	391.084	-0.542	-7.7	27	3	5	5	10
ZINC000019323242	CCC12CN3CC(CC)(CN(C1)C3[C@@H](O)[C@H](O)[C@H](O)[C@H](O)CO)C2=O	358.21	-2.245	-6.6	25	4	7	5	8
CHEMBL1993872	CC(=O)Nc1nc(C)c(s1)S(=O)(=O)NC(=O)NC2NC(=O)NC2=O	376.026	-1.437	-7.2	24	2	4	5	8
ZINC000218254352	Nc1nc(NCc2nnn[nH]2)cc(C2CC(N)C2)n1	261.145	-0.611	-8	19	3	4	4	8
CHEMBL3925381	NS(=O)(=O)NCCCNc1nonc1\C(=N\O)\Nc2cccc(c2)C(F)(F)F	423.094	0.931	-8.3	28	2	8	5	8
CHEMBL187252	CC(C)(C)C#Cc1nc(nc(n1)N(CCO)CCO)N(CCO)CCO	367.222	-1.149	-4.8	26	1	10	4	9
ZINC000001607872	COC(=O)NC1(NC(=O)OC)NC(=O)c2cc(OC)c(OC)c(OC)c2N1	384.128	0.191	-6.3	27	2	5	4	9
ZINC000253534904	CNc1cc([C@H]2C[C@@H](NC(=O)Cc3c(C)nc(O)nc3O)C2)ncn1	344.16	0.633	-7.7	25	3	5	4	8
CHEMBL254205	O[C@H]1C[C@@H](O[C@@H]1OP(=O)(O)O)N2C=C(C=O)C(=O)NC2=O	322.02	-1.936	-7.8	21	2	4	4	8
CHEMBL3298882	C[C@@]1(O)[C@H](O)[C@](C)([NH+]=C2N1C=Nc3c2ncn3CCCO)C(=O)[O-]	337.139	-4.34	-5.8	24	3	4	4	9
CHEMBL3763929	OC[C@H]1O[C@@]2(CC(=NO2)c3ccc4OCOc4c3)[C@H](O)[C@@H](O)[C@@H]1O	339.095	-1.29	-7.8	24	4	2	4	9
CHEMBL4091182	CC(=O)Nc1ccc(O[C@@H]2O[C@H](COS(=O)(=O)O)[C@@H](O)[C@H](O)[C@H]2O)cc1	393.073	-1.349	-7.7	26	2	6	5	9
ZINC000059490010	O=C1NC(=O)C(=CNNc2ccc([N+](=O)[O-])cc2S(=O)(=O)N2CCCCC2)C(=O)N1	438.096	-0.064	-7.9	30	3	6	4	9
CHEMBL167191	CNc1ncnc2c1ncn2C3COC(COP(=O)(O)O)C(C3)OP(=O)(O)O	439.066	-0.215	-7.6	28	3	7	5	10
ZINC000016955737	CC(C)(S)[C@H](NC=O)C(=O)OC(C)(C)OC(=O)[C@H](NC=O)C(C)(C)S	394.123	0.455	-6.1	25	0	10	4	8
CHEMBL3322316	COC(=O)c1cccc(c1)C(=O)N[C@@H]2O[C@H](CO)[C@@H](O)[C@H](O)[C@H]2O	341.111	-1.997	-7.3	24	2	4	5	8
CHEMBL3403444	Nc1ncc(c(N[C@@H]2C[C@H](CO)[C@@H](O)[C@H]2O)n1)c3nccs3	323.105	-0.303	-6.1	22	3	4	5	9
CHEMBL281494	CN(Cc1cnc2nc(N)nc(N)c2n1)c3ccc(cc3)C(=O)NCS(=O)(=O)O	418.117	-0.204	-7.2	29	3	6	4	10
CHEMBL3317459	CC(=O)C1(CCN2CCCC2)CCOC1=O.OC(C(O)C(=O)O)C(=O)O	375.153	-1.128	-6.1	26	2	7	4	8
CHEMBL605441	NC1=NN(C2O[C@H](CO)[C@@H](O)[C@H]2O)C(=S)S1	265.019	-1.132	-6.4	16	2	2	4	9
ZINC000019312824	CC12CN3CC(C)(CN(C1)C3[C@H](O)[C@@H](O)[C@@H](O)[C@@H](O)CO)C2=O	330.179	-3.025	-6.2	23	4	5	5	8
ZINC000073667129	CCNc1nc(NCC)nc(NNC(=S)N[C@@H]2CCS(=O)(=O)C2)n1	374.131	-0.287	-7.1	24	2	7	5	9
CHEMBL330755	CN(CC(=O)NS(=O)(=O)c1nc2ccc(OCCO)cc2s1)C(=N)N	387.067	-0.702	-7.6	25	2	7	4	8
CHEMBL1988719	CC(=O)NNc1nc(C)c(s1)C(=O)NNC(=O)C(=O)Nc2c(C)c(C)ccc2[N+](=O)[O-]	449.112	0.839	-7.2	31	2	5	5	9
CHEMBL1183718	CN(C1CN=C(NC(=O)N)NC1=O)C(=O)C[C@@H](N)c2csc(CCN)n2	382.154	-1.985	-7	26	2	6	5	8
CHEMBL1203977	Cl.NCCCC(N)(C(F)F)C(=O)OCCCNc1nc(N)nc(N)n1	384.16	-0.495	-6.1	25	1	10	5	10
ZINC000025585147	COc1ccc([C@@H](O)[C@@H](NN=C(N)N)c2nc3ccc([N+](=O)[O-])cc3[nH]c2=O)cc1	413.145	0.393	-8.1	30	3	7	5	8
CHEMBL2008291	[O-][N+](=O)c1ccc(cc1)C(C2C(=O)NC(=O)NC2=O)C3C(=O)NC(=O)NC3=O	389.061	-1.357	-7.6	28	3	4	4	8
CHEMBL3322323	OC[C@H]1O[C@@H](NC(=O)CCc2oc(cn2)c3ccccc3)[C@H](O)[C@@H](O)[C@@H]1O	378.143	-0.81	-8.6	27	3	6	5	8
ZINC000016363260	COc1cc(C(c2c(O)nc(C)[nH]c2=O)c2c(O)nc(C)[nH]c2=O)ccc1O	386.123	0.776	-5.5	28	3	4	5	8
CHEMBL3982725	NS(=O)(=O)OC[C@H]1C[C@@H](Nc2cc(N[C@H]3CCc4c(F)cccc34)ncn2)[C@H](O)[C@@H]1O	453.148	0.457	-8.6	31	4	7	5	9
ZINC000062725220	CC(=O)N[C@@H]1[C@@H](Oc2ccc3oc(=O)sc3c2)O[C@@H](CO)[C@@H](O)[C@H]1O	371.067	-0.823	-7.1	25	3	4	4	9
CHEMBL3218372	CN(CC(O)C(O)C(O)C(O)CO)C=C(C#N)C#N	271.117	-2.715	-6.4	19	0	7	5	8
CHEMBL376259	N[C@@H]1C[C@H](N)CN(C1)c2nc(Nc3cccc(c3)C(F)(F)F)nc(n2)N4C[C@H](N)C[C@H](N)C4	466.253	0.363	-7.7	33	4	4	5	10
ZINC000257208622	NCCCC(=O)N1C[C@H](O)[C@@H](n2cnc3c2nc(N)nc3N)C1	320.171	-1.526	-5.8	23	3	4	4	9
ZINC000253497342	Cc1ccc(S(=O)(=O)Nc2ccc(O[C@@H]3O[C@@H](CO)[C@H](O)[C@@H](O)[C@@H]3O)cc2)cc1	425.114	-0.025	-7.4	29	3	6	5	8
CHEMBL3914312	NS(=O)(=O)NCCNc1nonc1\C(=N\O)\NCc2occ(Br)c2	422.996	-0.444	-8.4	24	2	8	5	9
ZINC000097101786	COc1cc(NS(=O)(=O)c2cnc3nc(O)[nH]c(=O)c3c2)c(C(=O)O)cc1OC	422.053	0.54	-6.8	29	3	6	4	9
ZINC000140021647	CN1C(=O)NC(=O)[C@](O)([C@@]2(O)C(=O)NC(=O)N(C)C2=O)C1=O	314.05	-4.135	-8.4	22	2	1	4	8
ZINC000004878902	Nc1nc(N)c(/N=N/c2ccccc2S(=O)(=O)O)c(=O)[nH]1	310.048	0.596	-6.3	21	2	3	4	8
CHEMBL164765	CN(Cc1cnc2nc(N)nc(N)c2n1)c3ccc(cc3)C(=O)NC(C\C=C\C(=O)O)C(=O)O	466.171	0.435	-8.3	34	3	9	5	10
CHEMBL3526288	O[C@H]1[C@H](Oc2cccc3OC(=CC(=O)c23)c4ccccc4)O[C@@H]([C@@H](O)[C@@H]1O)C(=O)O	414.095	0.731	-7	30	4	4	4	8
ZINC000077272358	CCOC(=O)c1ccc(N[C@@H]2O[C@@H](CO)[C@@H](O)[C@H](O)[C@@H]2O)cc1	327.132	-0.925	-6.6	23	2	5	5	8
ZINC000005496624	CNC(=O)[C@@H]1OCCOCCO[C@@H](C(=O)NC)[C@@H](C(=O)NC)OCCOCCO[C@@H]1C(=O)NC	492.243	-3.442	-5.5	34	1	4	4	10
ZINC000019325251	CC(C)C12CN3CC(C(C)C)(CN(C1)C3OC[C@H](O)[C@@H](O)[C@H](O)CO)C2=O	386.242	-1.14	-6.3	27	4	8	4	8
CHEMBL1997749	OCC1OC(C(O)C(O)C1O)N2C3=C(CCCCCC3)C=C(C#N)C2=S	380.141	0.721	-6	26	3	2	4	8
ZINC000408632186	COc1cc(OC)cc(-c2nc(S/C(=C/C3C(=O)NC(=O)NC3=O)C(=O)O)n[nH]2)c1	433.069	0.532	-8.2	30	3	7	4	9
ZINC000031829837	COC(=O)C1=C(C)N(NC(N)=O)C2(N)N(NC(N)=O)C(C)=C(C(=O)OC)C12C#N	408.151	-2.199	-4.9	29	2	4	5	10
CHEMBL1615532	CS(=O)(=O)CC[C@H](N)C(=O)N[C@@H](CO)[C@@H](O)c1ccc(cc1)[N+](=O)[O-]	375.11	-1.133	-6.5	25	1	9	4	8
ZINC000245224557	CN1N=C(O)C(=O)N[C@@H]1SCC1=C(C(=O)O)[C@@H]2C(=O)[C@@H](N)[C@@H]2SC1	372.056	-1.041	-6.1	24	3	4	4	8
CHEMBL3211188	Cc1cc(Cl)ccc1OCC(=O)N\N=C\c2ccc(OC3OC(CO)C(O)C(O)C3O)cc2	480.13	0.356	-7.4	33	3	8	5	9
ZINC000016957911	CC(=O)c1cccc(NC(=O)C(=O)Nn2c(N)nnc2N)c1	303.108	-0.646	-7.3	22	2	3	4	8
CHEMBL389975	CCS(=O)(=O)NC\C(=N/OC)\[C@@H]1C[C@@H](CN1)SC2=C(N3[C@H]([C@H]2C)[C@@H]([C@@H](C)O)C3=O)C(=O)O	490.156	-0.454	-6.6	32	3	10	4	9
ZINC000085392044	Cn1c(S)nnc1[C@H](O)[C@@H](O)c1n[nH]c(=S)n1C	288.046	-0.338	-5.6	18	2	3	4	9
CHEMBL1191711	CC1(C)N=C(N)N=C(N)N1c2cccc(c2)N3C(=NC(=NC3(C)C)N)N	356.219	0.058	-6.1	26	3	2	4	10
CHEMBL463753	[K+].Oc1cc(O)c2C(=O)C(=C(Oc2c1)c3ccc(O)c(O)c3)OS(=O)(=O)[O-]	419.955	-1.875	-1.2	27	3	3	4	10
ZINC000003150912	N=C(N/N=C/c1cc(Br)cc([N+](=O)[O-])c1O)c1nonc1N	368.982	0.977	-7.9	22	2	4	4	9
CHEMBL454627	CCC1CC1[C@H](O)[C@H](O)C2=C(C)C(=O)[C@@]3(O2)[C@@H](O)[C@](NC3=O)(OC)C(=O)c4ccccc4	445.174	0.083	-6.1	32	4	7	4	8
ZINC000585286144	NC[C@@H]1O[C@H](C(=O)NCCc2cnccn2)[C@H](O)[C@H](O)[C@H]1O	312.143	-3.056	-7.4	22	2	5	5	8
CHEMBL539944	OC[C@H]1O[C@H]([C@H](O)[C@@H](O)[C@@H]1O)c2nn[nH]n2	232.081	-3.285	-7.5	16	2	2	5	8
CHEMBL1991220	[Cl-].C[N+](C)(C)c1nc(N)nc2c1ncn2C3OC(CO)C(O)C3O	360.131	-4.779	-1	24	3	3	4	9
ZINC000059490019	C[C@@H]1CN(S(=O)(=O)c2cc([N+](=O)[O-])ccc2NNC=C2C(=O)NC(=O)NC2=O)C[C@@H](C)O1	468.106	-0.441	-7.9	32	3	6	4	10
CHEMBL3679702	OC[C@H]1O[C@H]([C@H](O)[C@@H](O)[C@@H]1O)c2ccc(Cl)c(Cc3nccnn3)c2	367.093	-0.369	-6	25	3	4	4	8
CHEMBL456724	Nc1ccc(cc1)S(O)(O)Nc2nnc(s2)S(=O)(=O)N	336.997	0.904	-6.1	20	2	4	5	9
ZINC000059859744	O=[N+]([O-])c1ccc(O[C@@H]2O[C@H](CO)[C@@H](O)[C@H](O)[C@H]2O)c(Cl)c1	335.041	-0.573	-7.6	22	2	4	4	8
ZINC000239432826	CC(C)C12CN3CC(C(C)C)(CN(C1)C3[C@H](O)[C@H](O)[C@H](O)[C@@H](O)CO)C2=O	386.242	-1.753	-5.8	27	4	7	5	8
CHEMBL518553	C[C@@H]1O[C@@H](Oc2cc(O)c3C(=O)c4c(O)cc(C)cc4C(=O)c3c2)[C@H](O)[C@H](OC(=O)C)[C@H]1O	458.121	0.959	-8.3	33	4	3	4	10
CHEMBL1193991	CN(C1CN=C(NC(=O)N)NC1=O)C(=O)C[C@@H](N)CS(=O)(=O)CCN	377.148	-3.942	-7.3	25	1	7	5	8
CHEMBL543190	Br.C\C(=N/NC1=NCCN1)\c2cccc(c2)\C(=N\NC3=NCCN3)\C	406.123	0.81	-8.2	25	3	4	4	8
ZINC000005672483	CCOC(=O)/C(C(=N)NN)=C1\NN=C(c2ccc(OC)cc2)O1	319.128	0.192	-7.1	23	2	5	4	8
CHEMBL27045	Cc1ncc(COP(=O)(O)O)c(\C=N\OCC(O)CN)c1O	335.088	-0.625	-6.4	22	1	8	5	8
ZINC000005350690	CC(C)(Oc1ccc(Cl)cc1)C(=O)O[C@@H]1O[C@H](C(=O)O)[C@@H](O)[C@H](O)[C@H]1O	390.072	-0.067	-7.5	26	2	5	4	8
ZINC000096568910	CCOC(=O)NC(=O)/C=C(\C)NC[C@H](C)N/C(C)=C/C(=O)NC(=O)OCC	384.201	0.907	-6.2	27	0	9	4	8
CHEMBL2357611	COc1ccc(Cl)cc1c2noc(n2)[C@@H]3O[C@H](CO)[C@H](O)[C@H](O)[C@H]3O	372.072	-0.087	-8.1	25	3	4	4	9
CHEMBL518191	NC(=O)c1c(CNC(C2CCNCC2)c3c[nH]cn3)no[n+]1[O-].OC(=O)C(F)(F)F	435.148	-0.406	-5.1	30	3	6	5	8
CHEMBL3303857	NCc1cc(C(=O)N)n(n1)[C@@H]2OC[C@@H](O)[C@@H](O)[C@H]2O	272.112	-2.948	-7.5	19	2	3	5	8
CHEMBL3142997	O[C@H]1C[C@@H](O[C@@H]1COP(=O)(O)CC(=O)O)N2C=C(C=C)C(=O)NC2=O	376.067	-0.885	-7.5	25	2	7	4	8
CHEMBL3278672	OCC1=Nc2c(O)nc(S)nc2NC1O	228.032	-0.72	-6.2	15	2	1	5	8
CHEMBL2237501	O.O.COc1cc(Cc2cnc(N)nc2N)cc(OC)c1OC.OC(=O)C(=O)O	416.154	-1.236	-1.7	29	2	5	4	9
ZINC000072312189	COc1nc(NCC(=O)NC(C)(C)C)nc(NCC(=O)NC(C)(C)C)n1	367.233	0.533	-7.1	26	1	7	4	8
CHEMBL1794940	CC1OC2(CCN(C)CC2)C3OCCOC13.OC(=O)\C=C/C(=O)O.OC(=O)C(=O)O	433.158	-0.479	-4.5	30	3	2	4	8
CHEMBL3273013	C[C@H](NC(=O)C)C(=O)N[C@@H](C)C(=O)N1CCC[C@H]1C(=O)NN(C)C(=O)O[C@@H](C)C(=O)NN	457.228	-2.515	-7.1	32	1	7	5	8
CHEMBL3126880	OC[C@H]1O[C@H]([C@H](O)[C@@H]1O)n2cc(c3cocc3)c4C(=O)NC=Nc24	333.096	-0.404	-7.1	24	4	3	4	8
CHEMBL2414833	COc1ccc(CNC[C@@H]2O[C@H](CO)[C@@H](O)[C@H](O)[C@H]2O)c(OC)c1	343.163	-1.364	-6.8	24	2	7	5	8
ZINC000095626788	OC[C@@H]1O[C@H](O)[C@@H](/N=C/c2ccc3c(c2)OCO3)[C@H](O)[C@@H]1O	311.101	-1.366	-6.8	22	3	3	4	8
CHEMBL223007	NC(=O)OCC1=C(COC(=O)N)C(=O)c2c(O)ccc(O)c2C1=O	336.059	-0.036	-5.9	24	2	4	4	8
ZINC000103768494	CC(=N/O)/C(=N\O)C(=N\O)/C(C)=N\O	202.07	0.347	-7.5	14	0	3	4	8
CHEMBL2219757	CCOCC.NC(=O)c1nonc1CNC(C2CCNCC2)c3c[nH]cn3	379.233	0.765	-3.3	27	3	8	4	8
CHEMBL3642955	CC(Cc1ccc(s1)C(=O)Oc2ccc(cc2)C(=N)N)C(=O)N[C@@H](CS(=O)(=O)O)C(=O)O	483.077	0.887	-7.5	32	2	10	5	8
ZINC000210998319	CCOC(=O)NC(=O)/C=C(/C)NCCCN/C(C)=C\C(=O)NC(=O)OCC	384.201	0.909	-5.9	27	0	10	4	8
ZINC000036532673	CC(=O)N[C@H]1[C@H](O)[C@H](O)[C@@H](CO)O[C@H]1Oc1ccc2c(C)cc(=O)oc2c1	379.127	-0.576	-7.8	27	3	4	4	8
CHEMBL461748	O.NC(=O)c1nonc1CN2CCC(Cc3c[nH]cn3)CC2.OC(=O)C(=O)O	398.155	-1.323	-1.7	28	3	5	4	8
CHEMBL195221	CN(CC1=NC2C(N)N=C(N)N=C2C=C1)c3ccc(cc3)C(=O)NC(CCC(=O)O)C(=O)O	455.192	-0.396	-7.3	33	3	9	5	9
ZINC000012320972	O=[N+]([O-])c1cc(N[C@H]2OC[C@@H](O)[C@H](O)[C@H]2O)ccc1S(=O)(=O)O	350.042	-1.308	-7.8	23	2	4	5	9
ZINC000013736631	CN(C)[C@@H]1C(O)=C(C(N)=O)C(=O)[C@@]2(O)C(O)=C3C(=O)c4c(ccc([N+](=O)[O-])c4O)C[C@H]3C[C@@H]12	459.128	0.029	-6.2	33	4	3	5	10
CHEMBL359163	C[C@H](O)[C@H]1O[C@@H](Oc2ccc(\C=C(/C)\C(=O)N3CCN(C)CC3)cc2O)[C@@H](O)[C@@H]1O	422.205	-0.224	-6.5	30	3	5	4	8
ZINC000001674440	Nc1nc(N)nc(Cc2nc(N)nc(N)n2)n1	234.109	-2.024	-7.2	17	2	2	4	10
CHEMBL1188032	NC(=N)Nc1nc(cs1)C(=O)Nc2nc3ccc(cc3s2)S(=O)(=O)N	397.009	0.958	-7.3	25	3	4	5	8
CHEMBL178393	CC1=C(SC2CCCCC2)N(COCNC(=O)CNCP(=O)(O)O)C(=O)NC1=O	450.134	0.042	-6.1	29	2	10	5	8
CHEMBL299319	CO[C@]12C3NC3CN1C4=C(C2COC(=O)N)C(=O)C(=C(C)C4=O)NC(CO)C(=O)O	422.144	-2.575	-5.5	30	4	7	5	10
ZINC000239377959	Cc1ccc([N+](=O)[O-])cc1N[C@@H]1O[C@H]([C@H](O)CO)[C@@H](O)[C@@H]1O	314.111	-0.885	-7.4	22	2	5	5	8
CHEMBL40845	COc1cc(O)c2CSC[C@H](NC(=O)[C@H](COC(=O)c2c1C)NC(=O)OC(C)(C)C)C(=O)N	483.168	0.976	-5.5	33	2	3	4	9
CHEMBL425018	OCC1O[C@@H](O\N=C\c2cccnc2)C(O)[C@@H](O)C1O	284.101	-1.768	-7.2	20	2	4	4	8
CHEMBL339987	OC(=O)C[C@H](NC(=O)OCC=C)C(=O)COC(=O)c1c(O)cccc1O	367.09	0.579	-7.3	26	1	9	4	8
ZINC000575598468	O=C(O)[C@H]1O[C@@H](Oc2cc3oc(O)nc3cc2Cl)[C@H](O)[C@@H](O)[C@@H]1O	361.02	-0.542	-7.5	24	3	3	5	9
CHEMBL2325753	OP(=O)(O)COCC(COCP(=O)(O)O)Cn1cnc2C(=O)NC=Nc12	412.055	-0.961	-6.5	26	2	10	5	8
CHEMBL3642930	CC(Cc1occ(c1)C(=O)Oc2ccc(cc2)C(=N)N)C(=O)N[C@@H](CS(=O)(=O)O)C(=O)O	467.1	0.419	-7.7	32	2	10	5	8
CHEMBL1888199	NC(=O)c1ncn(n1)[C@@H]2O[C@H](CNC3=NS(=O)(=O)c4ccccc34)[C@@H](O)[C@H]2O	408.085	-2.265	-8.2	28	4	4	4	10
CHEMBL1909807	Cl.NC(=N)NC(=O)c1nc(Cl)c(NCCS(=O)(=O)Cc2ccccc2)nc1N	447.065	0.784	-7	28	2	7	5	8
CHEMBL3894196	CN1CCC(CC1)Nc2nc(NC3CC3)n4ncc(\C=C\5/NC(=O)NC5=O)c4n2	397.197	0.385	-6.7	29	5	5	4	9
ZINC000008622312	CC(/C=N/NC1=NCCN1)=N/NC1=NCCN1	236.15	-1.554	-5.4	17	2	3	4	8
ZINC000044889807	NC(=O)c1c(SCC(=O)Nc2nncs2)sc2c1[nH]c(=O)cc2O	382.982	0.976	-6.5	24	3	5	4	9
CHEMBL3238479	[NH3+]c1cc(cc2C=C(\C(=N\Nc3ccc(cc3F)C(=O)O)\C(=O)c12)S(=O)(=O)O)S(=O)(=O)[O-]	485	0.195	-7.5	32	3	5	4	9
CHEMBL3197218	Oc1nnc(NCC(=O)N\N=C\C2CCC=CC2)c(O)n1	292.128	0.153	-8.5	21	2	5	4	8
CHEMBL3091868	N\N=C\C(O)C(O)C(O)C(CC(=O)c1ccncc1)C(=O)c2ccncc2	372.143	-0.424	-5.4	27	2	9	4	9
ZINC000008665366	CCOC(=O)C1=C[C@](C)(C(=O)OCC)Nc2c(nc(N)[nH]c2=O)N1	337.139	-0.042	-7.3	24	2	4	4	9
CHEMBL1599287	NNC(=O)c1ccc(CSc2nnc(O)nc2O)cc1	293.058	0.179	-7.4	20	2	4	4	8
ZINC000585263525	C[C@@]1(O)CNC[C@H](O)C[C@H]1n1cnc2c1ncnc2N	278.149	-0.945	-6.8	20	3	1	4	8
ZINC000013898110	NC1=NC(=O)[C@@H](CC(=O)Nc2ccccc2NC(=O)C[C@@H]2SC(N)=NC2=O)S1	420.067	0.257	-7	28	3	6	4	8
CHEMBL3542365	CC(CO[C@@H]1O[C@@H]([C@@H](O)[C@H](O)[C@H]1O)C(=O)O)[C@]2(C)SC(=NC2=O)N[C@H]3C[C@@H]4CC[C@H]3C4	458.172	-0.302	-7.6	31	4	6	5	9
CHEMBL203357	CNC(=O)[C@H]1S[C@H]([C@H](O)[C@@H]1O)n2cnc3c(N)nc(Cl)nc23	344.046	-0.856	-7.2	22	3	2	4	9
CHEMBL1889453	COc1ccc(OC)c(NC(=O)Nc2nnc(s2)[C@@H]3O[C@H](CO)[C@@H](O)[C@H]3O)c1	412.105	0.353	-7.4	28	3	6	5	10
ZINC000257377397	CC1(C)C(CO[C@H]2O[C@@H](CO)[C@H](O)[C@@H](O)[C@@H]2O)=CC(=O)C2=C1SCC(=O)N2	401.114	-1.587	-7.2	27	3	4	5	9
ZINC000019170585	CN(C)N[C@H]1O[C@@H]([C@@H](O)S(=O)(=O)O)[C@@H](OCc2ccccc2)[C@@H](OCc2ccccc2)[C@H]1O	482.172	0.515	-5	33	3	10	4	9
ZINC000019170545	O=S1(=O)C[C@H](O)[C@H](NN[C@H]2CS(=O)(=O)C[C@H]2O)C1	300.045	-3.604	-6.8	18	2	3	4	8
ZINC000072433567	Nc1nc(CNc2nc(N)nc3c2CCNCC3)cs1	291.127	0.398	-7.1	20	3	3	4	8
CHEMBL27206	COP(=O)(CC1C(O)C(O)C(O)C(O)C1O)OC	286.082	-2.093	-6.3	18	1	4	5	8
ZINC000409415471	COc1cc([C@H](c2n(-c3nc[nH]n3)c(C)c(C)[n+]2[O-])C2C(=O)NC(=O)NC2=O)ccc1O	441.14	-0.326	-5.6	32	4	5	4	9
ZINC000102921292	CC1=C(NC(=O)/C(=N/NC(=S)NN)C2C(=O)CC(C)(C)CC2=O)C(=O)c2ccccc2C1=O	469.142	0.724	-6.9	33	3	4	4	8
CHEMBL3318257	CCN(CC)CCC1(CCOC1=O)C(=O)C.OC(C(O)C(=O)O)C(=O)O	377.169	-0.882	-5.7	26	1	9	4	8
ZINC000101153894	C/C(=C\C(=O)c1c(O)c2ccccc2n(C)c1=O)NC(CO)(CO)CO	362.148	-0.364	-6	26	2	7	5	8
CHEMBL1742458	CN1C(=NS(=O)(=O)N=C1NCCSCc2csc(N=C(N)N)n2)N	391.067	-1.268	-7.7	24	2	6	4	9
ZINC000082111326	O=c1ccn([C@H]2O[C@@H](COP(=O)(O)O)[C@H](O)[C@@H]2O)c(=S)[nH]1	340.013	-1.366	-7	21	2	4	5	8
CHEMBL2261930	Cl.Cn1cc(N)cc1C(=O)Nc2cc(C(=O)Nc3cc(C(=O)NCCC(=O)N)n(C)c3)n(C)c2	490.184	0.816	-6.2	34	3	8	5	8
ZINC000077304050	O[C@@]1(CNCc2n[nH]c(-c3cnccn3)n2)CNCCOC1	305.16	-1.298	-6.7	22	3	5	4	8
ZINC000036367412	CC(C)(C)OC(=O)NCC(=O)OC[C@@H]1O[C@H](O)[C@@H](O)[C@@H](O)[C@@H]1O	337.137	-2.146	-6.5	23	1	4	5	9
ZINC000013135557	NC(=O)NC(=O)C[C@H]1S/C(=N/N=C2\NC(=O)CS2)NC1=O	330.02	-1.707	-7.5	21	2	3	4	8
ZINC000022859761	C[C@@]1(CO)COC(=O)[C@@](C)([C@]2(C)N[C@](C)(CO)COC2=O)N1	316.163	-1.701	-5.1	22	2	3	4	8
ZINC000013574368	O=C(O)CNC(=O)C[C@@H]1SC(NNC2=NC(=O)CS2)=NC1=O	345.02	-1.701	-7.5	22	2	4	4	8
CHEMBL219798	N[C@@H]1C[C@H](N)CN(C1)c2nc(N)nc(n2)N3C[C@H](N)C[C@H](N)C3	322.234	-2.817	-6.5	23	3	2	5	10
CHEMBL1741764	Nc1nc(O)c2CN(CNc2n1)c3ccc(cc3)S(=O)(=O)N	322.085	-0.199	-6.9	22	3	2	4	8
ZINC001772700311	Cc1cccc(Nc2nc(N)nc(CN3C[C@@]4(C(=O)O)C[C@@]4(C(=O)O)C3)n2)c1	384.155	0.867	-7.8	28	4	6	4	8
CHEMBL1366768	Cc1occc1c2oc(SCCNCCO)nn2.OC(=O)C(=O)O	359.079	0.468	-4.5	24	2	7	4	9
CHEMBL1965239	NCCCN1CCN(CC(=O)O)CCN(CCCN)CCN(CC(=O)O)CC1	402.295	-1.925	-4.9	28	1	10	4	8
CHEMBL317521	COC(=O)[C@H](CCN)NC(=O)[C@@H](N)CCC\N=C(/N)\N[N+](=O)[O-]	333.176	-2.803	-6.7	23	0	10	5	8
CHEMBL2112867	CNc1nc(C)nc2c1ncn2[C@H]3C[C@H](OP(=O)(O)O)[C@]4(COP(=O)(O)O)C[C@H]34	449.087	0.715	-7	29	4	7	5	9
CHEMBL1982106	CC(=O)NNc1nc(C)c(s1)C(=O)NNC(=O)C(=O)Nc2cccc(c2)C(=O)C	418.106	0.517	-7.6	29	2	5	5	8
ZINC000104090645	Nc1nc(O)nc(O)c1/N=N\c1ccc(S(N)(=O)=O)cc1	310.048	0.533	-7.8	21	2	3	4	9
CHEMBL3230040	CC(=O)C1=C(O)\C(=C(/O)\Nc2ccc(N)cc2)\C(=O)OC1=O	304.07	0.935	-7.3	22	2	3	4	8
CHEMBL3144011	NC(=O)c1ncnc2c(n[nH]c12)[C@@H]3O[C@H](CO)[C@@H](O)[C@H]3O	295.092	-2.394	-7	21	3	3	5	8
CHEMBL591949	OC[C@H]1O[C@H]([C@H](O)[C@@H](O)[C@@H]1O)c2ccc(Cl)c(Cc3nnc(s3)c4cnccn4)c2	450.076	0.754	-6.8	30	4	5	4	10
CHEMBL81054	COC(=O)c1c(Cl)ncnc1N[C@@H]2O[C@H](CO)[C@@H](O)[C@H]2O	319.057	-1.233	-7.1	21	2	4	4	9
CHEMBL1208039	OC(C(=O)c1ccc(cc1)c2ccc(cc2)C(=O)C(O)S(=O)(=O)O)S(=O)(=O)O	430.003	0.131	-7	28	2	7	4	8
CHEMBL175210	C[C@@H](O)[C@@H]1[C@H]2[C@@H](C)C(=C(N2C1=O)C(=O)O)S[C@@H]3CN[C@@H](C3)C4CC(=NO4)CO	411.146	-0.259	-6.3	28	4	6	4	8
CHEMBL1766282	Nc1nc(N)c2ncn(C[C@@H](CF)OCP(=O)(O)O)c2n1	320.08	-0.519	-7	21	2	6	4	8
CHEMBL3933068	COC[C@@H]1CCCN1Nc2nc(NC3CC3)n4ncc(\C=C\5/NC(=O)NC5=O)c4n2	413.192	0.317	-7.2	30	5	7	4	10
ZINC000005425214	Nc1nc(N)c(N)c(OS(=O)(=O)O)n1	221.022	-1.595	-7.6	14	1	2	4	8
ZINC001772591452	COc1ccc(/C=C2\NC(=O)[C@@]34C[C@@]5(O)[C@H](O)C=C[C@@H](S3)[C@H]5ON4C2=O)c(O)c1OC	448.094	-0.114	-6.4	31	6	3	4	9
ZINC000012694236	Nc1nc(N)nc(SCC(=O)Nc2ccc3[nH]c(=O)[nH]c3c2)n1	332.08	-0.064	-7.4	23	3	4	5	8
CHEMBL102772	C[S+]([O-])CSC[C@@H](CO)NC(=O)\C=C\c1c(C)nc(O)nc1O	361.077	-0.244	-6.1	23	1	8	4	8
CHEMBL3918554	O=C1NC(=O)\C(=C\c2cnn3c(NC4CC4)nc(NC5CC5)nc23)\N1	340.14	0.453	-7.5	25	5	5	4	8
ZINC000031302774	NNS(=O)(=O)c1cccc(S(=O)(=O)c2cccc(S(=O)(=O)NN)c2)c1	406.008	-1.177	-7.9	25	2	6	4	8
CHEMBL3642961	NC(=N)c1ccc(OC(=O)c2ccc(CCC(=O)N[C@@H](CS(=O)(=O)O)C(=O)O)s2)c(F)c1	487.052	0.78	-7.3	32	2	10	5	8
ZINC000004411152	O=C1c2ccccc2C(=O)C2=C1[C@H]1C=CC=N[C@@H]1[C@](O)(S(=O)(=O)O)[C@]2(O)S(=O)(=O)O	454.998	-0.846	-6.4	30	4	2	4	9
CHEMBL3221801	O[C@@H]1C[C@@](O)(C=C([C@H]1O)c2cn(nn2)c3cccc(c3)C(=O)O)C(=O)O	361.091	-0.71	-8.4	26	3	4	5	8
CHEMBL3586147	OC[C@@H](NC(=O)CCNC(=O)c1nc[nH]n1)[C@H](O)c2ccc(cc2)[N+](=O)[O-]	378.129	-0.956	-7.5	27	2	9	5	8
CHEMBL363874	Nc1nc(N)nc(NCc2ccc(cc2)S(=O)(=O)N)n1	295.085	-0.705	-7.4	20	2	4	4	8
CHEMBL1207111	O=C(Nc1cc(NC(=O)c2nnn[nH]2)cc(c1)C#N)c3nnn[nH]3	325.078	-0.911	-8.1	24	3	4	4	9
CHEMBL1206766	C[C@]1(COC(=O)Cc2ccc(O)c(O)c2)[C@@H](N3C(\C(=C/C(=O)O)\C3=O)S1(=O)=O)C(=O)O	455.052	-0.997	-8.4	31	3	6	4	9
CHEMBL2106304	CCOC(=O)c1ccc(OCCN2C[C@H](O)[C@@H](O)[C@H](O)[C@H]2CO)cc1	355.163	-0.999	-7.4	25	2	7	4	8
CHEMBL1933484	OC[C@H]1O[C@@H](Cc2cn(Cc3ccccc3Cl)nn2)[C@H](O)[C@@H](O)[C@@H]1O	369.109	-0.635	-7.8	25	3	5	4	8
CHEMBL2136224	OC[C@H]1O[C@H]([C@H](O)[C@@H](O)[C@H]1O)c2nc(cs2)C(=O)NCc3cccs3	386.061	-0.351	-6.9	25	3	5	5	9
CHEMBL307109	OCN1C(=O)C2C3C(C(C4C(C3C(=O)O)C(=O)N(CO)C4=O)C(=O)O)C2C1=O	396.08	-3.25	-5.1	28	4	4	4	8
CHEMBL332657	Nc1ccc(cc1SSc2cc(ccc2N)S(=O)(=O)N)S(=O)(=O)N	405.99	0.945	-6.4	24	2	5	4	8
CHEMBL555132	OC[C@H]1O[C@]2(ON=C(S2)c3ccc(cc3)c4ccccc4)[C@H](O)[C@@H](O)[C@@H]1O	389.093	0.906	-7.5	27	4	3	4	8
CHEMBL353488	NCCCCN(CCCN)c1nc(N)nc(N)n1	254.197	-1.07	-6.2	18	1	8	4	8
CHEMBL1744156	[Na+].Nc1c(O)c2c(O)cc(cc2cc1S(=O)(=O)O)S(=O)(=O)[O-]	356.959	-3.012	-1.2	22	2	2	4	8
ZINC000003830404	N[C@@H](C(=O)N[C@@H]1C(=O)N2C(C(=O)O)=C(CSc3cn[nH]n3)CS[C@H]12)c1ccc(O)cc1	462.078	0.041	-7.4	31	4	7	5	9
CHEMBL1794941	CC1OC2(CCN(C)CC2)C3SCCSC13.OC(=O)\C=C/C(=O)O.OC(=O)C(=O)O	465.113	0.954	-4.4	30	3	2	4	8
CHEMBL3953952	N[C@@H]1CC[C@@H](CC1)Nc2nc(NC3CC3)n4ncc(\C=C\5/NC(=O)NC5=O)c4n2	397.197	0.561	-6.6	29	5	5	5	9
CHEMBL1185038	CC(C)C(N)C(=O)O[C@H]1[C@H](CO)O[C@H](N2C=CC(=NC2=O)N)[C@@]1(C)O	356.17	-1.639	-6.6	25	2	5	4	10
CHEMBL2007947	OC1C(O)C(CP(=O)(O)O)OC1COP(=O)(O)Oc2ccc(cc2)[N+](=O)[O-]	429.023	-0.243	-8.1	27	2	8	5	9
ZINC000263626191	NS(=O)(=O)c1ccc(NN=Cc2ccc(O)c(O)c2O)c([N+](=O)[O-])c1	368.043	0.805	-7.1	25	2	5	5	9
CHEMBL1938666	Nc1nc(Cl)c(C#Cc2ccncc2)c(N[C@@H]3C[C@H](CO)[C@@H](O)[C@H]3O)n1	375.11	0.021	-6.7	26	3	3	5	8
CHEMBL250656	Nc1cccc2c1ncn2[C@@H]3O[C@H](CSCCC(=O)O)[C@@H](O)[C@H]3O	353.105	0.446	-5.2	24	3	6	4	8
ZINC000005949148	O=C(CSc1nc2ccccc2nc1SCC(=O)NCCO)NCCO	396.093	0.031	-5.9	26	2	10	4	8
CHEMBL2104469	COCC1=C(N2[C@H](SC1)[C@H](NC(=O)\C(=N/O)\c3csc(N)n3)C2=O)C(=O)O	413.046	-0.711	-5.7	27	3	6	4	10
CHEMBL1085771	CSc1ccc(Cc2cc(ccc2Cl)[C@@H]3O[C@H](CO)[C@@H](O)[C@H](O)[C@H]3O)nn1	412.086	0.958	-7.4	27	3	5	4	8
ZINC000005163642	COCCCNc1nc(N)c([N+](=O)[O-])c(NCCO)n1	286.139	-0.18	-7.3	20	1	9	4	9
CHEMBL559902	Nc1nc(N)c2ncn(CCCCOP(=O)(O)O)c2n1	302.089	-0.12	-6.6	20	2	6	4	8
CHEMBL174430	[Na+].Nc1nc(cc(c2cccc(NC(=O)C(O)CCC(=O)[O-])c2)c1C#N)c3cc(Cl)ccc3O	488.086	-0.938	-8	34	3	7	4	8
ZINC000017419753	OC[C@@H]1O[C@H](n2cc(Br)c3c2ncnc3NO)[C@@H](O)[C@@H]1O	360.007	-0.394	-5.3	21	3	3	5	9
CHEMBL2385608	[NH4+].[NH4+].O[C@@H]1[C@H](O[C@H]([C@@H]1F)N2C=CC(=O)NC2=O)\C=C\P(=O)([O-])[O-]	356.09	-1.687	-1.3	23	2	3	4	8
ZINC000035645789	CC(=O)N[C@H]1[C@@H](O)[C@H](O)[C@H](COS(=O)(=O)O)O[C@@H]1Oc1ccc([N+](=O)[O-])cc1	422.063	-1.256	-6.2	28	2	7	4	10
CHEMBL3606035	O[C@H]1[C@@H](O)[C@@H](O[C@@H]1COP(=O)(O)CS(=O)(=O)O)N2C=CC(=O)NC2=O	402.013	-2.797	-7.7	25	2	6	5	10
CHEMBL3596443	C[C@H](NC(=O)OCc1ccccc1)C(=O)N[C@@H](COC(=O)CNC(=O)OC(C)(C)C)C(=O)O	467.19	0.939	-8.9	33	1	10	4	8
ZINC000072408900	Nc1nc2c(c(N[C@@H]3CS(=O)(=O)C[C@H]3O)n1)CCNCC2	313.121	-1.683	-6.1	21	3	2	4	8
CHEMBL3917709	CC(C)(CO)CNc1nc(NC2CC2)n3ncc(\C=C\4/NC(=O)NC4=O)c3n1	386.181	0.309	-5.9	28	4	7	5	9
ZINC000031719312	Nc1cnc(N2CCN(c3ncc(N)cc3N)CC2)c(N)c1	300.181	0.132	-6.5	22	3	2	4	8
CHEMBL4076924	NC(CO)(CO)CO.OC(=O)CCN1C(=O)Oc2cc(OCc3ccccn3)c(Cl)cc12	469.125	0.357	-4.6	32	3	9	5	10
ZINC000220973999	C/C(=N\NC1=NCCN1)c1cccc(/C(C)=N/NC2=NCCN2)n1	327.192	-0.373	-8.1	24	3	4	4	9
CHEMBL566771	NC(=O)c1nc(nn1[C@@H]2O[C@H](CO)[C@@H](O)[C@H]2O)C#Cc3ccc(cc3)C(F)(F)F	412.099	-0.593	-7.9	29	3	3	4	8
CHEMBL1989637	NC1CC(O)CC(=N1)Sc2nc(N)cc(O)n2	255.079	-0.306	-6.4	17	2	1	4	8
ZINC000017005388	N=C(N)SC[C@@H]1OCO[C@@H]1[C@@H]1OCO[C@@H]1CSC(=N)N	322.077	-0.277	-7	20	2	5	4	8
CHEMBL1192127	Cn1cc(NC(=O)Cn2ccnc2[N+](=O)[O-])cc1C(=O)NCCC(=N)N	362.145	-0.176	-7.5	26	2	8	4	8
CHEMBL3248282	C\C(=C\1/C(=C(C(=O)C)C(=O)OC1=O)O)\Nc2cc(O)c(O)c(O)c2	335.064	0.974	-7.1	24	2	3	5	9
CHEMBL166	Nc1nc(N)nc(Nc2ccc(cc2)[As]3SCC(CO)S3)n1	397.996	0.316	n	22	3	4	4	9
CHEMBL2113403	CCNC(=O)[C@H]1O[C@H]([C@H](O)[C@@H]1O)n2cnc3c(N)nc(nc23)C#CCN	361.15	-2.526	-6.9	26	3	3	5	10
CHEMBL3248258	CC(=O)C1=C(O)\C(=C(/C)\Nc2cccc(c2)C(=O)NC3C(=O)NC(=O)NC3=O)\C(=O)OC1=O	456.092	-0.679	-8.3	33	3	5	5	10
CHEMBL366730	[Na+].Nc1nc(cc(c2cccc(NC(=O)C(O)CCC(=O)[O-])c2)c1C#N)c3cc(F)ccc3O	472.116	-1.452	-1.2	34	3	7	4	8
CHEMBL3238483	Cc1cc(cc(C)c1N\N=C\2/C(=O)c3c([NH3+])cc(cc3C=C2S(=O)(=O)O)S(=O)(=O)[O-])C(=O)O	495.041	0.672	-6.6	33	3	5	4	9
ZINC000012563443	O=C1NC(=O)C2(C(=O)N1)[C@@H](c1cccc([N+](=O)[O-])c1)NC(=O)N[C@H]2c1cccc([N+](=O)[O-])c1	454.087	0.951	-6.5	33	4	4	4	8
CHEMBL3934976	COc1ccc(Cc2c(C)[nH]nc2O[C@@H]3O[C@H](CO)[C@@H](O)[C@H](O)[C@H]3O)cc1	380.158	-0.504	-7.2	27	3	6	5	8
ZINC000022872539	NC(=O)CN1CCN(CC(N)=O)CCN(CC(N)=O)CCN(CC(N)=O)CC1	400.255	-4.851	-5	28	1	8	4	8
CHEMBL1835411	Cl.N[C@@H](CO)C(=O)N1CC2(C[C@H]1C(=O)NCCCCCC(=O)NO)SCCS2	456.127	-0.313	-6.2	28	2	9	5	8
CHEMBL500420	Cc1nc(NS(=O)(=O)c2ccc(cc2)C(C)(C)C)sc1C[C@@H]3O[C@H](CO)[C@H](O)[C@H](O)[C@H]3O	486.149	0.935	-7.5	32	3	6	5	9
CHEMBL2373946	C[S+]([O-])c1nc(N)c2ncn([C@H]3[C@H](O)[C@H](O)[C@]4(COP(=O)(O)O)C[C@H]34)c2n1	419.066	-1.462	-6.7	27	4	5	5	10
CHEMBL4063704	COc1cc(OC)c(cc1OC)C(=O)NC[C@@H]2N[C@H](CO)[C@H](O)[C@@H]2O	356.158	-1.503	-6.7	25	2	7	5	8
ZINC000019323279	CCCC12CN3CC(C)(CN(C1)C3[C@@H](O)[C@H](O)[C@H](O)[C@H](O)CO)C2=O	358.21	-2.245	-6.7	25	4	7	5	8
CHEMBL1852287	CN(C)Cc1onc(c1)c2nc(c[nH]2)[C@@H](O)[C@H](O)[C@H](O)CO	312.143	-1.126	-6.9	22	2	7	5	8
ZINC000032597747	O=C(/C=C1/SC(=O)NC1=O)NCCCCCCNC(=O)/C=C1/SC(=O)NC1=O	426.067	0.513	-7.5	28	2	9	4	8
ZINC000005834662	COC(=O)/C(=N\NC(=S)NN)[C@H](C(=O)OC)C(=O)C(=O)Nc1cccc(C(F)(F)F)c1	463.077	-0.131	-7.6	31	1	7	4	9
CHEMBL608293	CC(C)CONC(=O)[C@H]1OC([C@H](O)[C@@H]1O)n2cnc3c(N)ncnc23	352.15	-1.268	-8.6	25	3	5	4	10
ZINC000008951230	Oc1ccc(C(c2c(O)ncnc2O)c2c(O)ncnc2O)cc1	328.081	0.975	-5.1	24	3	3	5	9
CHEMBL3278671	Nc1nc(O)c2N=C(C(O)Nc2n1)C(=O)O	225.05	-1.335	-7	16	2	1	5	8
CHEMBL1977711	CCC1=C(C)N(C2OC(CO)C(O)C(O)C2O)C(=S)C(=C1C)C#N	354.125	0.241	-4.9	24	2	3	4	8
ZINC000115997836	C[C@@H]1C/C=C2\SC[C@@H](NC(=O)c3coc(n3)C[C@@H](O)C[C@H](O)/C=C/C=C/CNC2=O)C(=O)O1	477.157	0.622	-6.8	33	3	0	4	9
CHEMBL591954	CCCc1nnc(Cc2cccc(c2)[C@@H]3O[C@H](CO)[C@@H](O)[C@H](O)[C@H]3O)s1	380.141	0.596	-6.9	26	3	6	4	8
ZINC000008627226	Nc1nc(O)c2c(n1)NCN(c1ccc(S(=O)(=O)O)cc1)C2	323.069	0.401	-6.8	22	3	2	4	8
CHEMBL17116	NC1=NC(=O)C2N=C(COC2N1)c3ccc(cc3)C(=O)NC(CCC(=O)O)C(=O)O	417.128	-1.307	-7.2	30	3	7	5	8
CHEMBL3892524	Cc1cc(ccc1O[C@H]2O[C@H](CO)[C@@H](O)[C@H](O)[C@@H]2O)c3ccc4ccnc(N)c4c3	412.163	0.971	-6.9	30	4	4	5	8
ZINC000004824165	CS(=O)(=O)NC[C@H]1O[C@@H](n2cnc3c2ncnc3N)[C@@H](O)[C@@H]1O	344.09	-2.423	-7.9	23	3	4	4	10
CHEMBL3144035	CCOP(=O)(O)OC[C@H]1O[C@H]([C@H](O)[C@@H]1O)C2=NNC(C(=O)N)C2=O	367.078	-2.989	-8.1	24	2	7	5	10
ZINC000005349434	C[C@@H](NC(=O)CSc1ncnc2[nH]cnc21)C(=O)N[C@@H](CCC(=O)O)C(N)=O	409.117	-1.215	-7.2	28	2	10	5	8
CHEMBL3590100	CO[C@H]1O[C@H](CO)[C@H](O)[C@H](OCc2cn(nn2)[C@@H](Cc3ccccc3)C(=O)O)[C@H]1O	423.164	-0.883	-7.1	30	3	9	4	10
ZINC001772592111	CC(C)C[C@@H]1C(=O)N[C@@H](CC(C)C)C(=O)N1O[C@@H]1O[C@H](CO)[C@@H](O)[C@H](O)[C@H]1O	404.216	-1.494	-6.3	28	2	7	5	8
CHEMBL1098400	CNC(=O)[C@H]1O[C@H]([C@H](O)[C@@H]1O)n2cnc3c(NCC4CC(C)(C)N([O])C4(C)C)ncnc23	448.231	-0.172	-8.3	32	4	5	4	10
CHEMBL1491763	OC[C@H](O)[C@H](O)[C@@H](O)[C@@H](O)[C@@H]1SC(=NN1c2ccccc2)c3ccccc3	390.125	0.364	-5.4	27	3	7	5	8
CHEMBL3527033	CCN(CC)C(=O)[C@]1(C[C@H]1CNC(=O)O[C@@H]2O[C@@H]([C@@H](O)[C@H](O)[C@H]2O)C(=O)O)c3ccccc3	466.195	-0.569	-7.6	33	3	8	5	8
ZINC000016576497	C[C@H](CO)NC(=O)Cn1c2ccc([N+](=O)[O-])cc2nc1SCC(=O)N[C@@H](C)CO	425.137	0.031	-6.2	29	2	10	4	9
ZINC000050446516	CO[C@H]1O[C@H]2COc3ccccc3O[C@@H]2[C@@H](NC(=N)N[N+](=O)[O-])[C@H]1O	354.118	-0.767	-6.1	25	3	3	4	8
CHEMBL502547	Cc1ccc(cc1)S(=O)(=O)Nc2nc(C)c(C[C@@H]3O[C@H](CO)[C@H](O)[C@H](O)[C@H]3O)s2	444.102	-0.054	-7.2	29	3	6	5	9
CHEMBL10591	Nc1nc(N)c2nc(CSc3ccc(cc3)C(=O)NC(CCC(=O)O)C(=O)O)cnc2n1	457.117	0.924	-7.5	32	3	9	5	10
CHEMBL220921	COC(=O)[C@@H](CSC(=O)[C@@]1(NC(=O)[C@H](CCCl)[C@]1(C)O)[C@@H](O)[C@H]2CCCC=C2)NC(=O)C	490.154	0.506	-5.6	32	2	9	4	8
CHEMBL3544799	CC1(CCOC2O[C@@H]([C@@H](O)[C@H](O)[C@H]2O)C(=O)O)CC(=O)NC1=O	333.106	-2.662	-6.7	23	2	5	5	8
CHEMBL1794938	CCC(=O)O\N=C\1/COC2(CCN(C)CC2)C1.OC(=O)\C=C/C(=O)O.OC(=O)C(=O)O	446.154	0.048	-4.5	31	2	4	4	9
CHEMBL1338950	Nc1ncnc2c(nsc12)[C@@H]3O[C@@H](CO)[C@H](O)[C@@H]3O	284.058	-1.178	-6.3	19	3	2	4	9
ZINC000002769138	Nc1cc(N)nc(SCC(=O)Nc2ccc(S(N)(=O)=O)cc2)n1	354.057	0.019	-7.5	23	2	5	4	8
ZINC000247793372	O[C@@H]1O[C@H]2O[C@H](O)[C@@H](O)O[C@H]2O[C@@H]1O	210.038	-2.994	-7.6	14	2	0	4	8
CHEMBL3318268	OC(C(O)C(=O)O)C(=O)O.Oc1ccc(\C=C\C(=O)C2(CCN3CCCC3)CCOC2=O)cc1	479.179	0.271	-6.7	34	3	9	5	9
ZINC000001748569	O=c1[nH]nc(SCc2ccccc2CSc2n[nH]c(=O)[nH]c2=O)c(=O)[nH]1	392.036	-0.186	-7.5	26	3	6	4	8
CHEMBL1206867	C[C@@H](O)[C@@H]1[C@H]2[C@@H](C)C(=C(N2C1=O)C(=O)O)S[C@@H]3CCO[C@@H]3CNC(=O)[C@H](C)NC(=O)[C@H](C)N	484.199	-1.001	-6.7	33	3	9	5	8
CHEMBL2107142	Cn1cccc1C(=O)C(C#N)C(=O)Nc2ccccc2.NC(CO)(CO)CO	388.175	-0.353	-6.8	28	2	7	5	8
CHEMBL111917	CSC[S+]([O-])CC(CO)NC(=O)\C=C\c1cnc(O)nc1O	347.061	-0.553	-6	22	1	8	4	8
CHEMBL2070508	Nc1ncnc2c1ncn2[C@@H]3O[C@@H]([C@@H](O)[C@H]3O)C(=O)NC4CCCC4	348.155	-0.914	-7.2	25	4	3	4	9
CHEMBL1254519	OC[C@@H](O)[C@@H]1O[C@@H](Sc2ccc(cc2)[N+](=O)[O-])[C@H](O)[C@H]1O	317.057	-0.513	-7	21	2	5	4	8
ZINC000100071299	CC1=C(N)C(=O)C2=C(C1=O)N1C[C@H](N)[C@H](O)[C@]1(O)[C@@H]2COC(N)=O	338.123	-2.957	-5.8	24	3	2	5	9
CHEMBL4078273	CCCCCCc1ccc(O[C@@H]2O[C@H](COS(=O)(=O)O)[C@@H](O)[C@H](O)[C@H]2O)cc1	420.145	0.815	-8.1	28	2	10	4	8
ZINC000100751488	CC1(C)OC(=O)C(=CN[C@H](CCCNC(=N)N)C(=O)Nc2ccc([N+](=O)[O-])cc2)C(=O)O1	448.171	0.475	-8.2	32	2	9	5	9
CHEMBL2447905	N.N.OS(=O)(=O)OOS(=O)(=O)O	227.972	-1.136	-1.2	12	0	3	4	8
CHEMBL170510	CCNC1CC(=O)OC1C(O)C(=O)NC(CC(C)C)C2Cc3cccc(O)c3C(=O)O2	434.205	0.659	-7.1	31	3	8	4	8
CHEMBL4081811	CC(=O)N[C@@H]1[C@H](C=C(O[C@H]1[C@H](O)[C@H](O)Cn2cc(nn2)c3ccc(cc3)C(=O)O)C(=O)O)N=[N+]=[N-]	487.145	-0.084	-7	35	3	9	5	10
CHEMBL2260646	Cc1ccc2cc3c(\N=C\OC[C@@H](O)[C@@H](O)[C@H](O)C=O)n[nH]c3nc2c1	358.128	0.378	-7.6	26	3	7	4	8
ZINC000005430516	O=C1/C(=C/c2ccccc2)SC(=S)N1[C@@H]1O[C@@H](CO)[C@@H](O)[C@@H](O)[C@H]1O	383.05	-0.312	-5.6	25	3	3	4	8
ZINC000408721051	O=C1NC(=O)C(=NN=c2[nH]c3nonc3[nH]c2=Nc2ccc(Br)cc2)C(=O)N1	444.988	-0.503	-7.2	28	4	2	4	9
CHEMBL3805625	COC(=O)[C@H](Cc1ccccc1)NC(=O)CNc2nc(NC(=O)C)nc3[nH]cnc23	411.166	0.624	-7.8	30	3	8	4	8
CHEMBL1962845	CCOP(=O)(CNc1nc(N)c(nc1Cl)C(=O)NC(=N)N)OCC	379.092	0.971	-7	24	1	8	5	9
ZINC000005956233	CC(=O)c1c(C)n([C@H]2O[C@@H](CO)[C@@H](O)[C@@H](O)[C@H]2O)c(=S)c(C#N)c1-c1ccco1	420.099	0.833	-5.1	29	3	4	4	10
CHEMBL343132	C[C@@H](O)[C@@H]1[C@H]2[C@@H](C)C(=C(N2C1=O)C(=O)O)S[C@@H]3CN[C@@H](C3)C(=O)N4CC\C(=N\O)\C4	438.157	-0.334	-5.9	30	4	5	4	8
CHEMBL1812601	N[C@@H](CN1C(=O)N(Cc2ccsc2P(=O)(O)O)C(=O)c3sccc13)C(=O)O	431.001	-0.451	-5.6	27	3	6	4	9
CHEMBL1325732	NS(=O)(=O)c1ccc(cc1)\N=N/c2nc3c(O)nc(O)nc3[nH]2	335.044	0.827	-7.9	23	3	3	4	9
ZINC000002315605	O=C(NCCNC(=O)c1ccc(O)nn1)c1ccc(O)nn1	304.092	-1.162	-7.1	22	2	5	4	8
CHEMBL184107	CNc1nc(NC)nc(NCCc2ccc(cc2)S(=O)(=O)N)n1	337.132	0.257	-6.9	23	2	7	4	8
CHEMBL1683328	CC(=O)NCc1cn(nn1)[C@@H]2O[C@H](COP(=O)(O)O)[C@@H](O)[C@H]2O	352.078	-2.357	-7.9	23	2	6	5	9
CHEMBL3140289	OC[C@H]1O[C@@H](S\C(=N/OS(=O)(=O)O)\c2ccc(Br)cc2)[C@H](O)[C@@H](O)[C@@H]1O	472.945	-0.537	-6	26	2	5	5	10
CHEMBL549701	OC[C@H]1O[C@H]([C@H](O)[C@@H](O)[C@@H]1O)c2onc(n2)c3ccccc3	308.101	-0.749	-7.8	22	3	3	4	8
CHEMBL3143990	CCOC(=O)c1nc([C@@H]2O[C@H](CO)[C@@H](O)[C@H]2O)c(NC)nc1Cl	347.088	-0.498	-5.5	23	2	5	4	9
ZINC000002584655	Nc1nonc1NC(=O)CSc1nc(N)cc(N)n1	282.065	-0.663	-7.3	19	2	4	4	10
ZINC000010798406	CNC(=O)NC(=O)[C@@H](C)Sc1nnc(S[C@@H](C)C(=O)NC(=O)NC)s1	406.055	0.41	-6.7	25	1	6	4	9
CHEMBL2152443	C[C@@H]1[C@H]2CC[C@@](C)(O[C@@H]3O[C@H](CO)[C@@H](O)[C@H](O)[C@H]3O)[C@H]2COC1=O	346.163	-1.219	-5.5	24	3	3	4	8
ZINC000952863778	CC(C)[C@H]1NC(=O)CCN=C2C=C(CCNC(=O)[C@H](C)NC1=O)N=C(N1CCSCC1)N2	463.237	-0.168	-6.7	32	3	1	4	8
CHEMBL3195633	Oc1ccc2ccccc2c1\C=N\NC(=O)Cc3nnc(O)nc3O	339.097	0.834	-8.7	25	3	4	4	8
CHEMBL1766274	COCCNc1nc(N)nc2c1ncn2C[C@@H](CF)OCP(=O)(O)O	378.122	-0.043	-6.3	25	2	10	4	9
ZINC000225438270	CC(C)(C)c1cc(/C=N/NC2=NCCN2)c(O)c(/C=N/NC2=NCCN2)c1	370.223	0.455	-6.9	27	3	4	5	9
CHEMBL50861	CN(C)Nc1nc(CSCCC(=N)NS(=O)(=O)N)cs1	338.065	0.425	-6.2	20	1	8	4	8
ZINC000253535346	Cn1cc([C@@H](NC(=O)Cc2cc(O)nc(N)n2)[C@H]2C[C@@H](O)C2)cn1	332.16	-0.331	-7.1	24	3	5	4	8
CHEMBL420921	Nc1ncnc2c1ncn2OCC(CO)CCP(=O)(O)O	317.089	-0.987	-6.9	21	2	7	4	8
CHEMBL2371663	CC(C)(C)OC(=O)N1CCC[C@H]1C(=O)N[C@@H](CCC\N=C(/N)\N[N+](=O)[O-])C(=O)NCC(=O)N	472.239	-1.652	-7	33	1	10	5	8
ZINC000005732467	CCS(=O)(=O)C([C@@H](O)[C@H](O)[C@H](O)[C@H](O)CO)S(=O)(=O)CC	350.071	-3.382	-7.3	21	0	9	5	9
CHEMBL28922	NC(=N)NCCC[C@H](NC(=O)[C@@H]1CCN2CC[C@@](N)(Cc3ccccc3)CN12)C(=O)c4nccs4	498.253	0.709	-5.6	35	4	10	5	8
CHEMBL3272476	COc1cccc2C(=O)c3c(O)c4C[C@](O)(C[C@H](O)c4c(O)c3C(=O)c12)C(=O)O	400.079	0.677	-6	29	4	2	5	8
CHEMBL94860	NC(Cc1c(O)noc1c2nn[nH]n2)C(=O)O	240.061	-1.485	-7.7	17	2	4	4	8
CHEMBL150236	NC(=O)C(=O)NCCSSCCNC(=O)\C(=N\O)\Cc1ccc(O)c(Br)c1	477.998	0.627	-6.2	27	1	10	5	8
CHEMBL543311	Cl.Cn1cc(NC(=O)Cn2ccnc2[N+](=O)[O-])cc1C(=O)NCCC(=N)N	398.122	0.246	-7.4	27	2	8	4	8
CHEMBL135714	[Na+].COc1ccc(CCC(=O)c2c(O)cc(OCCC(O)C(=O)[O-])cc2O)cc1O	428.108	-2.489	-1.2	30	2	10	4	9
ZINC000003668393	Nc1nc(SCSc2n[nH]c(N)n2)n[nH]1	244.031	-0.071	-7	15	2	4	4	8
CHEMBL1823109	C\C=C\C1=CC2=CC(=O)[C@@](C)(OC(=O)c3c(C)c(O)c(O)cc3O)C(=O)[C@@]2(O)[C@@H](O)O1	432.106	0.645	-6.3	31	3	3	5	10
ZINC000000108824	CCN(CC)c1nc(NCC(=O)O)nc(NCC(=O)O)n1	298.139	-0.289	-7.5	21	1	9	4	8
CHEMBL284832	COC1C(N)Cn2c1c(COC(=N)O)c3C(=O)C(=C(C)C(=O)c23)N	334.128	0.138	-5.9	24	3	3	4	8
CHEMBL3425996	CCOC(=O)[C@]1(F)O[C@@H]([C@H](O)[C@H](O)CO)[C@H](NC(=O)C)[C@@H](N)[C@H]1F	356.14	-2.502	-6.8	24	1	6	5	8
ZINC000104293706	Cc1ccc([N+](=O)[O-])cc1NC(=O)/C(=N\NC(=S)NN)[C@H]1SC(=S)NC1=O	427.019	0.052	-6.8	27	2	5	5	9
CHEMBL3417106	CS(=O)(=O)c1ccc(cc1)c2ccc(O[C@H]3O[C@H](CO)[C@@H](O)[C@H](O)[C@@H]3O)cc2	410.104	-0.064	-7.3	28	3	5	4	8
CHEMBL2159432	CC(C)c1[nH]nc(O[C@@H]2O[C@H](CO)[C@@H](O)[C@H](O)[C@H]2O)c1Cc3ccccc3C#N	403.174	0.174	-7.3	29	3	6	5	8
CHEMBL1934408	OC(=O)COC(COCP(=O)(O)O)Cn1cnc2C(=O)NC=Nc12	362.063	-1.259	-7.1	24	2	9	4	8
ZINC000020479496	Nc1nc(SCC(=O)NCCNc2ccc([N+](=O)[O-])cn2)n[nH]1	338.091	0.01	-7.6	23	2	8	4	9
ZINC000009512131	CCNC(=O)NC(=O)[C@H](C)OC(=O)CNS(=O)(=O)c1ccc(NC)c([N+](=O)[O-])c1	431.111	-0.308	-7.1	29	1	9	4	9
ZINC000009139259	NS(=O)(=O)c1ccc(NNC(=S)NC(=O)c2ccco2)c([N+](=O)[O-])c1	385.015	0.467	-7.4	25	2	5	4	8
CHEMBL543722	Cl.NC(c1cc(cc2nc(O)c(O)nc12)[N+](=O)[O-])P(=O)(O)O	351.998	0.506	-7.5	22	2	3	5	8
CHEMBL1869608	OC(C(O)C(O)C1=NC2C=CC=CC2=N1)C(O)C3=NC4C=CC=CC4=N3	354.133	-0.875	-7.1	26	4	5	4	8
ZINC000001581856	OC[C@@H](O)[C@H](O)[C@@H](O)c1nn(-c2ccccc2)c2nc3ccccc3nc12	366.133	0.716	-6.8	27	4	5	4	8
CHEMBL1204624	O[C@H]1C[C@H]2[C@@H](NC(=O)c3c(O)c4OCOc4cc23)[C@@H]5OP(=O)(O)O[C@H]15	371.041	-0.035	-6.8	25	5	0	4	8
CHEMBL107964	CN(CC(=O)O)NC(=O)C[C@H](N)Cc1csc(CCNC(=O)OC(C)(C)C)n1	415.189	0.518	-6.8	28	1	10	4	8
CHEMBL3245844	OC1O[C@@H](COS(=O)(=O)c2ccccc2)[C@@H](O)[C@@H](O)[C@@H]1O	320.057	-1.808	-7.2	21	2	4	4	8
CHEMBL1541695	CCS(=O)(=O)O.CC1(C)N=C(N)N=C(N)N1c2cccc(CN)c2	356.163	0.225	-7.9	24	2	3	4	8
CHEMBL1090111	CO[C@H]1OCC(C[C@H]1O)S[C@H]2O[C@H](CO)[C@@H](O)[C@H](O)[C@H]2NC(=O)C	367.13	-2.214	-6.7	24	2	5	5	9
ZINC000003844563	CCOC(=O)CNc1cc(NCC(=O)OCC)c(N)cc1N	310.164	0.801	-6.7	22	1	8	4	8
CHEMBL1090580	OC[C@H]1O[C@H]([C@H](O)[C@@H](O)[C@H]1O)n2cc(nn2)c3ccccc3C(F)(F)F	375.104	-0.064	-7.1	26	3	3	4	8
ZINC000101152015	C/C(NCCNC(=O)c1nnc(N)[nH]1)=C1/C(=O)NC(=O)SC1=O	339.075	-1.51	-8	23	2	5	5	9
CHEMBL471024	NCCCC(N)(C(F)F)C(=O)OCCCNc1nc(N)nc(N)n1	348.183	-0.917	-6.5	24	1	10	5	10
ZINC000002818155	CC(C)(CO)NS(=O)(=O)c1ccc2c(c1)C(=NO)c1cc(S(=O)(=O)NC(C)(C)CO)ccc1-2	497.129	0.992	-6.2	33	3	8	5	8
CHEMBL3674540	NC(=O)NNC(=N)c1cnc2nnn(Cc3ccc4ncccc4c3)c2n1	362.135	0.316	-9.5	27	4	3	4	8
ZINC000016138139	O=C1NC(=S)NC(=O)C1=CN1CCN(C=C2C(=O)NC(=S)NC2=O)CC1	394.052	-2.566	-6.6	26	3	2	4	8
CHEMBL1964845	Cl.OCC1OC(C(O)C1O)c2nc(cs2)C3=NCCCN3	335.071	-0.541	-7.3	21	3	3	4	8
ZINC000019141890	NC(=O)C(Cn1c2ccc([N+](=O)[O-])cc2nc1SC(C(N)=O)C(N)=O)C(N)=O	409.08	-2.037	-5.8	28	2	9	4	9
CHEMBL611256	CCCC\C=C/c1nc(N)c2ncn(C3O[C@@H]([C@@H](O)[C@H]3O)C(=O)NCC)c2n1	390.202	0.367	-6.5	28	3	7	4	9
CHEMBL3221800	O[C@@H]1C[C@@](O)(C=C([C@H]1O)c2cn(nn2)c3cccc(c3)[N+](=O)[O-])C(=O)O	362.086	-0.5	-8.6	26	3	4	4	9
CHEMBL2007731	C1CNOCCCONCCCNOCCCONC1	292.211	-0.355	-5.6	20	1	0	4	8
ZINC000003408549	COCCNc1nnc(SCC(=O)Nc2cc(C(N)=O)cc(C(N)=O)c2)s1	410.083	0.525	-6.9	27	2	10	4	9
ZINC000004127867	CN(NO[C@H]1O[C@@H](CO)[C@@H](O)[C@@H](O)[C@H]1O)c1ccccc1	300.132	-1.641	-7	21	2	5	5	8
ZINC000008375242	Cc1nnc(N/N=C/c2cc(Br)c(O)cc2O)n1N	326.013	0.92	-6.4	19	2	3	4	8
CHEMBL3248251	CC(=O)C1=C(O)\C(=C(/C)\Nc2cccc(NC(=O)C(=O)C(=O)O)c2)\C(=O)OC1=O	402.07	0.449	-7.5	29	2	6	4	9
ZINC000001559380	Nc1nc(N)c2nc(CNc3ccc(C(=O)O)cc3)cnc2n1	311.113	0.894	-8.8	23	3	4	4	8
ZINC000003395077	CNC(=O)NC(=O)CSc1nnc(SCC(=O)NC(=O)NC)s1	378.024	-0.367	-6.3	23	1	6	4	9
ZINC000017125198	COC(=O)[C@@H](CCC/N=C(\N)N[N+](=O)[O-])NC(=O)c1ccc2c(c1O)C(=O)c1ccccc1C2=O	483.139	0.315	-8.4	35	3	8	4	9
CHEMBL229397	N[C@@H](C=O)[C@@H](O)[C@H](O)[C@H](O)COS(=O)(=O)O	259.036	-3.585	-6.4	16	0	7	5	8
CHEMBL3544822	Nc1nc(N)c2nc(c(N)nc2n1)c3ccc(OS(=O)(=O)O)cc3	349.059	0.015	-7.4	24	3	3	4	10
CHEMBL1205890	Clc1c(NC(=O)c2nnn[nH]2)cc(cc1NC(=O)c3nnn[nH]3)C#N	359.039	-0.258	-7.1	25	3	4	4	9
CHEMBL514144	CO[C@]1(NC(=O)[C@]2(OC(=C(C)C2=O)[C@@H](O)[C@@H](O)\C=C\C(=O)C)[C@H]1O)C(=O)c3ccccc3	445.137	-0.818	-6.2	32	3	7	4	9
ZINC000503919367	CC(C)(Oc1ccc([C@H]2CC2(Cl)Cl)cc1)C(=O)O[C@H]1O[C@@H](C(=O)O)[C@H](O)[C@@H](O)[C@@H]1O	464.064	0.941	-7.7	30	3	6	4	8
CHEMBL1973719	CCCC[S+](=O)(N)CCC(N)P(=O)(O)O.[O-]c1c(cc(cc1[N+](=O)[O-])[N+](=O)[O-])[N+](=O)[O-]	487.077	0.497	-6.3	31	1	10	4	10
CHEMBL3221802	O[C@@H]1C[C@@](O)(C=C([C@H]1O)c2cn(nn2)c3ccccc3O)C(=O)O	333.096	-0.703	-8.2	24	3	3	5	8
CHEMBL438530	OC[C@@H](O)[C@@H](O)[C@H](OC(=O)c1nn(Cc2cc(Cl)cc(Cl)c2)c3ccccc13)[C@H](O)CO	484.08	0.984	-7.9	32	3	9	5	9
CHEMBL3703838	OC[C@H]1O[C@H]([C@H](O)[C@@H](O)[C@@H]1O)c2ccc(Cl)c(Cc3ccc4OCCS(=O)(=O)c4c3)c2	470.08	0.612	-7.2	31	4	4	4	8
ZINC000095913658	COC(=O)CCc1ccc(OC)cc1O[C@@H]1O[C@H](CO)[C@@H](O)[C@H](O)[C@H]1O	372.142	-1.02	-7	26	2	7	4	9
CHEMBL488258	NS(=O)(=O)c1ccc(cc1)\N=N\c2nc3nc(O)nc(O)c3[nH]2	335.044	0.827	-7.3	23	3	3	4	9
CHEMBL3426124	COC(=O)[C@]1(F)O[C@@H]([C@H](O)[C@H](O)COC(=O)OCC(C)(C)C)[C@H](NC(=O)C)[C@@H](N)[C@H]1F	456.192	-0.685	-6.5	31	1	7	4	10
CHEMBL3542375	CC(C)[C@]1(C)SC(=NC1=O)N[C@H]2C[C@H]3C[C@@H]2C[C@H]3O[C@@H]4O[C@@H]([C@@H](O)[C@H](O)[C@H]4O)C(=O)O	458.172	-0.304	-6.7	31	4	5	5	9
CHEMBL2093926	NS(=O)(=O)c1ncnc2c1ncn2[C@@H]3O[C@H](CO)[C@@H](O)[C@@H]3O	331.059	-2.915	-7	22	3	3	4	10
ZINC000100998424	CC(=O)NC1=NN(c2ccccc2)C(=O)[C@H]1S[C@@H]1N=C(N)NN1	333.101	-0.709	-7.7	23	3	3	4	8
ZINC000059490004	CN(C)S(=O)(=O)c1cc([N+](=O)[O-])ccc1NNC=C1C(=O)NC(=O)NC1=O	398.064	-0.988	-7.6	27	2	6	4	9
CHEMBL3238482	COc1cc(ccc1N\N=C\2/C(=O)c3c([NH3+])cc(cc3C=C2S(=O)(=O)O)S(=O)(=O)[O-])C(=O)O	497.02	0.064	-7	33	3	6	4	10
CHEMBL3277497	NC(=O)c1ncn(n1)[C@@H]2S[C@H](CO)[C@@H](O)[C@H]2O	260.058	-2.295	-7.3	17	2	3	4	8
ZINC000002105930	Nc1ncn(CCCO)c2nc(NCCO)nc1-2	252.133	-0.853	-7.6	18	2	6	4	8
ZINC000040457308	C[C@@H](O)Nc1nnc(N[C@@H](C)O)nn1	200.102	-1.233	-6.6	14	1	4	4	8
CHEMBL1934409	NC1=Nc2c(ncn2CC(COCP(=O)(O)O)OCC(=O)O)C(=O)N1	377.074	-1.677	-8.3	25	2	9	5	9
ZINC000136705467	N=C1C=CC2=CC(S(=O)(=O)O)=CC(=O)C2=C1NNc1ccc([N+](=O)[O-])cc1S(=O)(=O)O	468.005	0.882	-8.4	31	3	6	5	10
ZINC000029338285	CC1=C(N)C(=O)c2c(COC(N)=O)c3n(c2C1=O)C[C@H](N)[C@H]3O	320.112	-0.931	-5.1	23	3	2	4	8
CHEMBL2443315	NS(=O)(=O)c1ccc(Nc2nc(F)nc(NCCO)n2)cc1	328.075	-0.194	-7.4	22	2	6	4	8
CHEMBL606293	N[S+]([O-])c1ncnc2c1ncn2C3O[C@H](CO)[C@@H](O)[C@H]3O	315.064	-2.581	-6.8	21	3	3	4	10
ZINC000101268480	CC1(C)OC(=O)C(=CNc2ccc(S(=O)(=O)NC(=N)N)cc2)C(=O)O1	368.079	-0.01	-8.4	25	2	4	4	8
CHEMBL3764966	CC1(C)[C@H](NC(=O)\C(=N/OCc2ccc(cc2)C(=O)O)\c3csc(N)n3)C(=O)N1S(=O)(=O)O	497.068	0.253	-7.6	33	3	8	4	10
ZINC000002750362	O=C(Nc1nnn[nH]1)c1ccccc1C(=O)Nc1nnn[nH]1	300.083	-0.783	-8.5	22	3	4	4	8
CHEMBL1975040	CCOC(=O)[C@H](CO)NC1=C(Cl)C(=O)c2c(O)ccc(O)c2C1=O	355.046	0.441	-6.1	24	2	5	4	8
ZINC000821439073	CC(C)Cc1cc(C(=O)NCCc2nc(N)cc(O)n2)nc(O)n1	332.16	0.431	-8.4	24	2	6	4	8
ZINC000002199788	COc1cc(/C=N/NC(=N)c2nonc2N)cc(OC)c1O	306.108	0.324	-7.4	22	2	5	4	9
CHEMBL3327045	O[C@H]1CC(=O)[C@@H]2C[C@@]34SS[C@]5(C[C@@H]6[C@@H](O)C=C[C@H](O)[C@H]6N5C3=O)C(=O)N4[C@@H]2[C@H]1O	440.071	-1.792	-6.4	29	7	0	4	9
CHEMBL2221308	OC1O[C@H](COCC(F)Cn2ccnc2[N+](=O)[O-])[C@@H](O)[C@H](O)[C@H]1O	351.108	-2.054	-7	24	2	7	4	10
CHEMBL348752	COC1OC(CO)C(Sc2nc(C)ccc2O)C(O)C1O	317.093	-0.358	-6.6	21	2	4	4	8
ZINC000002288831	Nc1nc(N)nc(-c2ccc(-c3nc(N)nc(N)n3)cc2)n1	296.125	-0.281	-7.5	22	3	2	4	10
CHEMBL3311520	Cc1ccc(cc1)S(=O)(=O)\N=C\2/Oc3ccccc3C=C2CO[C@@H]4O[C@H](CO)[C@H](O)[C@H](O)[C@H]4O	491.125	0.347	-8.3	34	4	6	4	9
CHEMBL593132	CCCCNc1nc(NN)nc(n1)N(C)O	227.149	0.195	-7.5	16	1	6	4	8
CHEMBL1650565	CN1C(=CC(=N)c2ccc(Nc3cc(C)[n+](C)c(N)n3)cc12)C.OS(=O)(=O)[O-]	406.142	0.825	-4.3	28	3	2	4	8
CHEMBL462818	O[C@H]1C=C2[C@@H](NC(=O)c3c(O)c4OCOc4cc23)[C@@H]5OP(=O)(O)O[C@H]15.c6c[nH]cn6	437.062	0.285	-3.8	30	6	0	5	9
CHEMBL3216187	Cl.Cl.CN(C1CN=C(NC(=O)N)NC1=O)C(=O)C[C@@H](N)c2cc(CN)on2	424.114	-1.652	-7.1	27	2	5	5	8
ZINC000253405277	CC(=O)c1c2c(c(O)c(C)c1O)[C@]1(C)C(=CC(=O)/C(=C(/C)NCCS(N)(=O)=O)C1=O)O2	450.11	0.447	-7.4	31	3	5	4	9
CHEMBL543371	Br.CN(C1CN=C(Nc2nc(C)cs2)NC1=O)C(=O)C[C@@H](N)CCCCN	461.121	0.601	-7.6	27	2	8	4	8
ZINC000257357278	C[C@]1([C@@H]2CC(=O)C3=C(O)[C@H](C(N)=O)C(=O)C[C@H]3[C@H]2O)OC(=O)c2c1cccc2O	401.111	0.23	-6	29	4	2	4	8
ZINC000005758724	O=C1[C@H]2[C@H](C(=O)N1COP(=O)(O)O)[C@@H]1[C@H]2[C@H]2C=C[C@@H]1[C@H]1C(=O)N(COP(=O)(O)O)C(=O)[C@@H]12	492.033	-1.616	-5.5	32	6	6	4	8
ZINC000033599937	S=C(N/N=C\c1cccnc1)NN1CCN(NC(=S)N/N=C\c2cccnc2)CC1	442.147	0.22	-7	30	3	6	4	8
CHEMBL483890	C[C@H](COC1=CC(N)N(O)C(=N1)N)OCP(=O)(O)O	296.089	-1.311	-6.9	19	1	6	5	8
ZINC000071404965	C=C1C[C@@H](C)O[C@H]2O[C@H]3[C@H](O[C@@]12O)[C@@H](NC)[C@@H](O)[C@@H](NC)[C@@H]3O	330.179	-1.938	-5.4	23	3	2	5	8
CHEMBL4086367	CC(C)(NS(=O)(=O)C)[C@H](NC(=O)c1ccc(cc1)c2oc3ncncc3c2)C(=O)NO	447.121	0.821	-7	31	3	7	4	8
ZINC000040266417	CCC(CO)(CO)NC(=O)c1nc(CC(=O)Nc2cc(C)on2)no1	353.134	-0.59	-7.4	25	2	8	4	9
CHEMBL1621272	N[C@@H](CO)c1oc(nn1)[C@H](CCC(=O)O)NC(=O)C2CCNCC2	341.17	-0.917	-6.1	24	2	8	5	8
CHEMBL477284	OC(=O)CNC(=O)CNC(=O)CNC(=O)c1cc(cc(c1)[N+](=O)[O-])[N+](=O)[O-]	383.071	-1.45	-7.8	27	1	9	4	8
CHEMBL29604	C[C@@H]1C2CC3[C@H](N(C)C)C(=O)C(=C(O)[C@@]3(O)C(O)C2C(=O)c4c(O)cccc14)C(=O)N	430.174	-0.153	-6.5	31	4	2	5	8
ZINC000225503808	Cc1noc(C)c1NC(=O)N[C@@H]1C[C@H](Cn2cc(C3CC3)nn2)[C@@H](O)[C@H]1O	376.186	0.692	-6.9	27	4	5	4	8
CHEMBL1086192	OC[C@H]1O[C@H]([C@H](O)[C@@H](O)[C@@H]1O)c2ccc(Cl)c(Cc3ccc(OC4CCOCC4)nn3)c2	466.151	0.793	-7.1	32	4	6	4	9
CHEMBL606296	C[C@H]1OC([C@H](O)[C@@H]1O)n2cnc3c(nc(N)nc23)[S+](N)[O-]	314.08	-1.971	-7.4	21	3	2	4	10
CHEMBL3946508	NS(=O)(=O)OC[C@H]1C[C@@H](Nc2ncnc3[nH]c(nc23)c4ccccc4)[C@H](O)[C@@H]1O	420.122	-0.238	-8.7	29	4	6	5	9
ZINC000012547435	Cc1nc2nc(N)nn2c(C)c1CCC(=O)NCCCCCc1n[nH]c(N)c1C#N	410.229	0.962	-7.1	30	3	9	4	9
CHEMBL526843	CO[C@@H]1CC[C@](C)(O)C(=C1O)C(=O)C2(C)NC(=O)CC[C@H](N)C(=O)O2	356.158	-0.576	-6.4	25	2	3	4	8
CHEMBL542847	Cl.Cl.CC1(C)N=C(N)N=C(N)N1c2cccc(c2)N3C(=NC(=NC3(C)C)N)N	428.172	0.901	-5.4	28	3	2	4	10
CHEMBL29568	CN(C)[C@H]1C2CC3C(C(O)[C@]2(O)C(=C(C(=O)C)C1=O)O)C(=O)c4c(O)cccc4[C@@]3(C)O	445.174	0.054	-6.1	32	4	2	5	9
ZINC000005379987	OCC(CO)(CO)Nc1ncc(-c2nc3ccccc3o2)cn1	316.117	0.412	-6.8	23	3	6	4	8
CHEMBL2018050	Nc1nc(Cl)c(c(N[C@@H]2C[C@H](CO)[C@@H](O)[C@H]2O)n1)c3nccs3	357.066	0.35	-6.1	23	3	4	5	9
CHEMBL3392184	[Br-].C[S+](C[C@@H]1O[C@@H]([C@@H](O)[C@H]1O)n2cnc3c(N)ncnc23)C4CC(N)C=C4	458.074	-4.064	-1.1	27	4	4	4	9
CHEMBL438830	N[C@@H]1C[C@H](N)CN(C1)c2nc(Cl)nc(n2)N3C[C@H](N)C[C@H](N)C3	341.184	-1.746	-6.5	23	3	2	4	9
CHEMBL1709360	COC(=O)[C@@H]1C[C@@]2(O)[C@H](O)[C@H](O)[C@H](O)C[C@H]2N1Cc3ccc(C)s3	357.125	-0.61	-5.1	24	3	3	4	8
ZINC000020508399	Nn1c(SC/C(O)=N/c2ncn[nH]2)nnc1-c1ccccc1O	332.08	0.863	-8.2	23	3	5	4	9
CHEMBL280929	CC1OC(OC2CCCCC2OC(=O)N3CCC(CC3)(C(=O)O)C(=O)O)C(O)C(O)C1O	461.19	-0.47	-7	32	3	5	5	9
CHEMBL3339255	OC[C@H]1O[C@@H](Oc2ccc(cc2)C(=O)N\N=C\c3cccc(c3)C#N)[C@H](O)[C@@H](O)[C@@H]1O	427.138	-0.499	-6.9	31	3	6	5	9
CHEMBL42734	Nc1nc(NCC(O)CO)c(Cl)nc1[N+](=O)[O-]	263.042	-0.615	-7.6	17	1	5	4	8
CHEMBL1192858	OCCCNc1nnc(NCCCO)c2C(=O)c3ccccc3C(=O)c12	356.148	0.841	-7	26	3	8	4	8
ZINC000864096986	C[C@@H](NC(=O)C(F)(F)C(=O)N[C@H](C)c1nccc(N)n1)c1nccc(N)n1	380.152	0.121	-7.7	27	2	6	4	8
CHEMBL3392183	[Br-].C[S+](C[C@@H]1O[C@@H]([C@@H](O)[C@H]1O)n2cnc3c(N)ncnc23)C4CC(ON)C=C4	474.068	-4.133	-1.1	28	4	5	4	10
CHEMBL3310895	OC[C@H]1O[C@@]2(S\C(=N/C(=O)c3ccc4ccccc4c3)\NC2=O)[C@H](O)[C@@H](O)[C@@H]1O	418.083	-0.631	-8.3	29	4	2	5	8
CHEMBL2106191	[Ca+2].Oc1ccc(O)c(c1)S(=O)(=O)[O-].Oc2ccc(O)c(c2)S(=O)(=O)[O-]	417.934	-0.377	-6.8	25	2	2	4	10
CHEMBL1818666	COc1cc(CCCO[C@@H]2O[C@H](CO)[C@@H](O)[C@H](O)[C@H]2NC(=O)C)ccc1O	385.174	-0.706	-7.1	27	2	8	5	8
ZINC000077285147	COC(=O)CNC(=O)[C@H](CS)NC(=O)CC[C@H](NC(=O)OC(C)(C)C)C(=O)OC	435.168	-0.463	-6.3	29	0	10	4	9
CHEMBL25529	Oc1nc2c(Cc3c(Cc4nn[nH]n4)cccc23)n5cc(nc15)P(=O)(O)O	385.069	-0.087	-7.1	27	5	3	4	8
ZINC000003618344	O=C(O)COCC(=O)Nc1cc(SC[C@@H](O)CO)cc([N+](=O)[O-])c1	360.063	0.08	-6.9	24	1	10	4	8
ZINC000001673377	Nc1nc(N)nc(-c2ccccc2-c2nc(N)nc(N)n2)n1	296.125	-0.281	-6.4	22	3	2	4	10
ZINC000257291245	O=C(Nc1nccs1)[C@@H]1CS[C@@H]2[C@H](O)[C@@H](O)[C@H](O)[C@H](O)C(=O)N12	361.04	-2.191	-6.1	23	3	2	5	9
CHEMBL1965180	COC1(CC(CO)(CNc2nc(N)nc(Cl)c2\C=N/O)C1)OC	345.12	0.694	-5.7	23	2	7	4	9
CHEMBL3545940	O[C@@H](COC(=O)C1CCCNC1)[C@H]2OC(=O)C(=C2O)O	287.101	-0.857	-7	20	2	4	4	8
ZINC000039264109	NC(=O)[C@@H]1OCCOCCO[C@@H](C(N)=O)[C@@H](C(N)=O)OCCOCCO[C@H]1C(N)=O	436.181	-4.485	-5.3	30	1	4	4	10
CHEMBL608033	CCCCC#Cc1nc(N)c2ncn(C3O[C@H](C\N=C(/S)\NC)[C@@H](O)[C@H]3O)c2n1	419.174	0.075	-6.5	29	3	5	5	9
CHEMBL2002837	COC(=O)C(C(=O)C(=O)Nc1nnc(S)[nH]1)c2csc(N)n2	342.02	-0.404	-7.6	22	2	5	4	10
ZINC000006219030	Cc1nnc(N/N=C/c2ccc(O)c(O)c2)n1N	248.102	0.158	-7.6	18	2	3	4	8
CHEMBL603724	CNc1ncnc2c1cnn2C3O[C@H](CO)[C@@H](O)[C@H]3O	281.112	-1.521	-6.3	20	3	3	4	9
ZINC000104335026	NC(=O)NC(=O)/C=C/C(=O)OCCOC(=O)/C=C\C(=O)NC(N)=O	342.081	-2.425	-7.9	24	0	7	4	8
ZINC000408527137	COc1ccccc1N1C(=O)NC(=O)/C(=C\NC(CO)(CO)CO)C1=O	365.122	-1.533	-7	26	2	7	5	8
CHEMBL3303476	CC(NC(=O)c1ccc(cc1)N(C)Cc2cnc3nc(N)nc(N)c3n2)C(=O)O	396.166	0.424	-7.3	29	3	6	4	9
CHEMBL1570116	COC(=O)[C@@H]1C[C@@]2(O)[C@H](O)[C@H](O)[C@H](O)C[C@H]2N1Cc3cc(OC)cc(OC)c3	397.174	-0.963	-6.8	28	3	5	4	9
CHEMBL2159356	OC1O[C@H](COC\C=C\n2ccnc2[N+](=O)[O-])[C@@H](O)[C@H](O)[C@H]1O	331.102	-1.921	-7.3	23	2	6	4	10
CHEMBL489983	COc1ccc(cc1)[C@@H](CNC(=O)\C=C/c2ccccc2)O[C@@H]3O[C@H](CO)[C@@H](O)[C@H](O)[C@H]3O	459.189	0.382	-6.6	33	3	9	5	8
CHEMBL1938398	CS(=O)(=O)c1ccccc1C#Cc2c(Cl)nc(N)nc2N[C@@H]3C[C@H](CO)[C@@H](O)[C@H]3O	452.092	0.03	-6	30	3	4	5	9
CHEMBL3988738	CNS(=O)(=O)CCNc1nc(NCCO)c2cnn(C)c2n1	329.127	-1.271	-7.6	22	2	8	4	9
CHEMBL1962613	COC(=O)CNc1nc(N)c(nc1Cl)C(=O)NC(=N)N	301.069	-1.08	-8.1	20	1	4	5	8
CHEMBL3959717	O=C1NC(=O)\C(=C\c2cnn3c(NC4CC4)nc(NC5CCNC5)nc23)\N1	369.166	-0.347	-7.1	27	5	5	5	9
ZINC000252642531	CON[C@]1(C(C)=NN)NC(N)=NN=C1C	213.134	-1.538	-7.7	15	1	3	4	8
ZINC000031750813	n1n[nH]c(C2=NN=C(c3nnn[nH]3)NN2)n1	220.068	-3.071	-8.2	16	3	2	4	10
ZINC000217456177	O=C(O)CNc1ncc(CN2CCN(CCO)C[C@@H](O)C2)cn1	325.175	-1.556	-6.3	23	2	7	4	8
CHEMBL1742956	COC(=O)[C@@H]1O[C@@H](SCCN)[C@@H](O)[C@H](O)[C@H]1O	267.078	-2.341	-6.6	17	1	4	4	8
CHEMBL18049	CON(C)[C@@]12NC(=O)C(NC1=O)(OCCC2=C)[C@@H](O)[C@@](C)(O)CO	345.154	-2.801	-4.9	24	3	5	5	8
CHEMBL2000566	Oc1ccc(cc1)C(C2C(=O)NC(=S)NC2=O)C3C(=O)NC(=S)NC3=O.c4ccncc4	471.067	-0.148	-4	32	4	3	5	8
ZINC000005734148	COc1cccc2c1C(=O)c1c(O)c3c(c(O)c1C2=O)C[C@@](O)(C(=O)CO)CC3	398.1	0.663	-6.6	29	4	3	4	8
ZINC000012687369	Nc1cc(=O)[nH]c(SCC(=O)NC(=O)N[C@@H]2CCS(=O)(=O)C2)n1	361.051	-1.543	-7.9	23	2	4	4	8
CHEMBL587948	CC1(C)NC(=NC(=N)N1OCc2nc(N)nc(Nc3ccccc3)n2)N	356.182	0.52	-8.7	26	3	5	5	9
ZINC001529053577	CCN1C[C@@]2(COC)[C@H]3[C@H](OC)[C@H]4[C@H]1[C@@]3([C@H]1C[C@]3(O)[C@@H](O)[C@H]1[C@@]4(O)[C@H](O)[C@H]3OC)[C@H](OC)C[C@@H]2O	499.278	-1.787	-4.9	35	6	6	5	10
CHEMBL3913373	Oc1ccc(NC(=O)NNC(=O)C2C(=O)NC(=O)N(C2=O)c3ccccc3)cc1[N+](=O)[O-]	442.087	0.352	-8.3	32	3	4	5	8
CHEMBL3903473	COC(=O)C1=C[C@@H](O)[C@@H](O)[C@@H](O)[C@@H]1ON2C=CC(=C([C@@H]3[C@@H](C)C[C@@H](C)C[C@H]3C=C)C2=O)O	449.205	0.499	-5.1	32	3	5	4	9
CHEMBL384715	N[C@@H]1C[C@H](N)CN(C1)c2nc(NC3CCCCC3)nc(n2)N4C[C@H](N)C[C@H](N)C4	404.312	-0.654	-6.7	29	4	4	5	10
CHEMBL1683320	O[C@@H]1[C@@H](COP(=O)(O)O)O[C@H]([C@@H]1O)n2cc(nn2)c3ccc(F)cc3	375.063	-0.187	-8.6	25	3	5	4	8
CHEMBL3342257	NS(=O)(=O)O[C@@H]1CCN(C1)S(=O)(=O)[C@@H]2O[C@H](CO)[C@@H](O)[C@H](O)[C@H]2O	392.056	-4.589	-6.9	24	2	5	5	10
CHEMBL346133	CCOC(=O)Nc1cc2c(nc(S)n2N)c(N)n1	268.074	0.584	-6.5	18	2	2	4	8
ZINC000073667149	CCNc1nc(NCC)nc(NNC(=S)NC[C@H]2CCS(=O)(=O)C2)n1	388.146	-0.039	-6.9	25	2	8	5	9
CHEMBL3950973	O=C1NC(=O)\C(=C\c2cnn3c(NC4CC4)nc(NC5CCS(=O)(=O)C5)nc23)\N1	418.117	-0.522	-8.3	29	5	5	4	10
CHEMBL374789	N[C@@H]1C[C@H](N)CN(C1)c2nc(Nc3ccc(F)cc3)nc(n2)N4C[C@H](N)C[C@H](N)C4	416.256	-0.516	-7.2	30	4	4	5	10
CHEMBL146182	CCOC(=O)CC1=C(N)N=C(N)N(CCOCP(=O)(O)O)C1=O	350.099	-1.335	-6.9	23	1	8	4	9
CHEMBL1981957	C[S+](=O)(N)CCC(N)P(=O)(O)O.[O-]c1c(cc(cc1[N+](=O)[O-])[N+](=O)[O-])[N+](=O)[O-]	445.03	-0.673	-6.3	28	1	7	4	10
CHEMBL3642922	CC(Cc1oc(cc1)C(=O)Oc2ccc(cc2)C(=N)N)C(=O)N[C@@H](CS(=O)(=O)O)C(=O)O	467.1	0.419	-7.7	32	2	10	5	8
CHEMBL214044	COc1cccc(OC)c1C(=O)NNC(=O)C2(CCCCC2)C(=O)N[C@H]3CC(=O)OC3O	449.18	0.165	-7.5	32	3	6	4	8
CHEMBL160699	CN(Cc1cnc2nc(N)nc(N)c2n1)c3ccc(cc3)C(=O)NC(C(=O)O)C(F)(F)CC(=O)O	490.152	0.514	-8.1	35	3	9	5	10
CHEMBL3911536	NC1CCCCC1Nc2nc(NC3CC3)n4ncc(\C=C\5/NC(=O)NC5=O)c4n2	397.197	0.561	-7.7	29	5	5	5	9
CHEMBL3230036	CC(=O)C1=C(O)\C(=C(/O)\Nc2ccc(OC(=O)N)cc2)\C(=O)OC1=O	348.059	0.81	-7.3	25	2	4	4	9
CHEMBL2062316	CN1C[C@@H]2CN(C[C@@H]2C1)c3ccc(nn3)c4ccccc4C.OC(C(O)C(=O)O)C(=O)O	444.201	0.327	-5.9	32	4	5	4	8
CHEMBL474736	[Na+].O[C@H]1C=C2[C@@H](NC(=O)c3c(OP(=O)([O-])OCc4ccccc4)c5OCOc5cc23)[C@H](O)[C@@H]1O	499.064	-2.925	-7	34	5	5	4	10
ZINC000016546176	NC(=O)C(Sc1ncnn1C(C(N)=O)C(N)=O)C(N)=O	301.059	-3.779	-7	20	1	7	4	8
ZINC000006015772	Nc1nc(SCC(=O)CSc2n[nH]c(N)n2)n[nH]1	286.042	-0.459	-6.6	18	2	6	4	9
CHEMBL28224	NC1=NC(=O)N(C=C1)C2SC(O)C(O)C2O	245.047	-1.889	-6.8	16	2	1	4	8
CHEMBL3544696	CC1(C)S[C@@H](N[C@H]1C(=O)O)[C@H](NC(=O)Cc2ccccc2)C(=O)OCC(O)CO	426.146	-0.495	-6.6	29	2	9	5	8
CHEMBL145297	Nc1ncnc2c1ncn2\C=C/3\CC3COP(=O)(O)P(=O)(O)P(=O)(O)O	425.006	0.749	-6.7	26	3	6	5	9
CHEMBL264637	ONC(=O)N\N=C\c1cc(cc(c1O)[N+](=O)[O-])[N+](=O)[O-]	285.035	0.231	-8.8	20	1	4	4	8
CHEMBL1254847	CNC(=O)c1cn(nn1)[C@H]2[C@@H](O)[C@@H](CO)O[C@@H](SC)[C@@H]2O	318.1	-2.019	-7.2	21	2	4	4	9
CHEMBL1794939	CN1CCC2(CC1)C\C(=N\OC(=O)C)\CO2.OC(=O)\C=C/C(=O)O.OC(=O)C(=O)O	432.138	-0.342	-4.5	30	2	3	4	9
ZINC000077285383	NC(=O)OC[C@@H](O[C@@H]1O[C@H](C(=O)O)[C@@H](O)[C@H](O)[C@H]1O)c1ccccc1Cl	391.067	-0.615	-7.7	26	2	6	5	8
ZINC000019370493	O=S(=O)(O)C[C@H](O)CN1CCN(C[C@@H](O)CS(=O)(=O)O)CC1	362.082	-2.899	-6.3	22	1	8	4	8
CHEMBL3415959	NC1=Nc2ncc(CNc3ccc(cc3)C(=O)NO)nc2C(=O)N1	327.108	0.026	-7.9	24	3	4	5	8
CHEMBL3426123	COC(=O)[C@]1(F)O[C@@H]([C@H](O)[C@H](O)COC(=O)OC(C)C)[C@H](NC(=O)C)[C@@H](N)[C@H]1F	428.161	-1.322	-8	29	1	7	4	10
ZINC000001622566	CCc1nc(N)nc(C(=O)NCCNC(=O)c2nc(N)nc(CC)c2C)c1C	386.218	0.332	-7.3	28	2	7	4	8
CHEMBL83923	CC(N(Cc1cc(cc2nc(O)c(O)nc12)[N+](=O)[O-])C(=O)C)P(=O)(O)O	386.063	0.821	-5.6	26	2	5	4	8
CHEMBL78681	CN(Cc1nn[nH]n1)NC(=O)C[C@H](N)C[C@@H](O)CN	272.171	-2.91	-7.1	19	1	8	5	8
ZINC000032597750	O=C(/C=C1\NC(=O)SC1=O)NCCNC(=O)/C=C1\SC(=O)NC1=O	370.004	-1.047	-6.9	24	2	5	4	8
CHEMBL3707449	CN(C)CC(=O)OC[C@@H](O)[C@@H](O)[C@H](O)[C@@H](O)C(=O)O	281.111	-3.381	-6.1	19	0	8	5	8
CHEMBL134642	[K+].COc1ccc(CCC(=O)c2c(O)cc(OCCCP(=O)(O)[O-])cc2O)cc1O	464.064	-1.054	-1.2	30	2	10	4	8
CHEMBL2113436	CC(C)(C)NC(=O)[C@H]1O[C@H]([C@H](O)[C@@H]1O)n2cnc3c(N)ncnc23	336.155	-1.058	-6.4	24	3	2	4	9
ZINC000002508024	CC(C)N(CC(=O)OC[C@H](O)[C@H](O)[C@H](O)[C@H](O)C(=O)O)C(C)C	337.174	-1.823	-6.2	23	0	10	5	8
CHEMBL364754	Nc1nc(N)nc(NCCc2ccc(cc2)S(=O)(=O)N)n1	309.101	-0.662	-7.9	21	2	5	4	8
CHEMBL3707124	CO[C@@]12C(COC(=O)N)C3=C(N1CC4NC24)C(=O)C(=C(NCCc5c[nH]cn5)C3=O)C	428.181	-1.054	-7.4	31	5	7	4	9
CHEMBL1909780	Cl.COC(=O)CNc1nc(N)c(nc1Cl)C(=O)NC(=N)N	337.046	-0.658	-7.3	21	1	4	5	8
CHEMBL1957445	O[C@H]1[C@@H](O)[C@@H](O[C@@H]1CCP(=O)(O)O)N2C=C(C(=O)NC2=O)c3cc4ccccc4s3	454.06	0.605	-8.3	30	4	5	5	8
CHEMBL490844	COc1cc(cc(OC)c1OC)C(=O)N[C@H](CCC(=O)O)C(=O)NNC(=O)c2nccs2	466.116	0.593	-6.9	32	2	10	4	9
CHEMBL3558252	CO[C@@H]1O[C@H](CO)[C@H](O)[C@H](OCCOP(=O)(C)O)[C@H]1O	316.092	-1.711	-6.7	20	1	7	4	8
CHEMBL4094328	OC[C@H]1O[C@@H](S[C@@H]2CC(=O)[C@@H]3OC[C@H]2O3)[C@H](O)[C@@H](O)[C@@H]1O	322.072	-2.398	-6.3	21	3	3	4	9
CHEMBL1632638	COc1ccc(cc1)S(=O)(=O)N(C[C@H](O)CO)[C@H](CO)C(=O)NO	364.094	-2.095	-6.9	24	1	9	5	8
CHEMBL37605	NC(=O)C1OC(Sc2[nH]cnc3ncnc23)C(O)C(O)C1O	327.064	-2.31	-7.1	22	3	3	5	9
CHEMBL3230002	CC(=O)C1=C(O)\C(=C(/O)\Nc2cccc(N\C=N\N)c2)\C(=O)OC1=O	346.091	0.666	-7.6	25	2	5	5	9
ZINC000199197855	N[C@@H](Cc1ccccc1)C(=O)OCC(=O)[C@@H](O)[C@H](O)[C@H](O)CO	327.132	-2.256	-6.8	23	1	9	5	8
ZINC000003668962	O=C1NC(=S)NC(=O)C1C(c1cccc([N+](=O)[O-])c1)C1C(=O)NC(=S)NC1=O	421.015	-1.027	-6.8	28	3	4	4	8
CHEMBL2104689	CS(=O)(=O)O.O[C@H](CNC[C@H](O)[C@H]1COc2ccccc2O1)[C@@H]3COc4ccccc4O3	469.141	0.482	-4.1	32	4	6	4	9
CHEMBL3199110	COc1cccc(\C=N\NC(=O)C(=O)N\N=C\c2cccc(OC)c2O)c1O	386.123	0.715	-7	28	2	6	4	8
CHEMBL3426108	CC(=O)N[C@@H]1[C@@H](N)[C@@H](F)[C@@](F)(O[C@H]1[C@H](O)[C@H](O)CO)C(=O)OCc2cccs2	424.112	-1.26	-7.5	28	2	7	5	9
CHEMBL2018048	Nc1nc(Cl)c(c(N[C@@H]2C[C@H](CO)[C@@H](O)[C@H]2O)n1)c3cccs3	356.071	0.955	-6	23	3	4	5	8
ZINC000016383433	O=C1NC(=S)N=C(O)/C1=C/NNc1cc([N+](=O)[O-])cc([N+](=O)[O-])c1	352.023	0.675	-8.1	24	2	5	4	8
CHEMBL135482	[Na+].CNc1ccc(CCC(=O)c2c(O)cc(OCC(=O)[O-])cc2O)cc1O	383.098	-2.207	-1.2	27	2	8	4	8
CHEMBL1903410	OC[C@H]1O[C@H]([C@H](O)[C@@H](O)[C@H]1O)c2nc(cs2)C(=O)NCC(F)(F)F	372.06	-1.05	-6.8	24	2	4	5	8
CHEMBL552354	COc1ccc(cc1)C2=NN\C(=N/N=C/C(O)C(O)C(O)CO)\C(=C2)Cc3ccccc3OC	468.201	0.646	-7.4	34	3	10	5	9
CHEMBL593598	ONc1nc(NO)nc(n1)N2CCOCC2	228.097	-0.69	-7.8	16	2	3	4	9
CHEMBL331386	NCC(=O)NCCC(=O)Nc1nnc(s1)S(=O)(=O)N	308.036	-2.411	-8	19	1	6	4	8
CHEMBL243739	CO\N=C(/CNC(=O)N)\[C@@H]1C[C@@H](CN1)SC2=C(N3[C@H]([C@H]2C)[C@@H]([C@@H](C)O)C3=O)C(=O)O	441.168	-0.725	-6.5	30	3	8	5	8
CHEMBL516924	OC[C@H]1O[C@H]([C@H](O)[C@@H]1O)n2cc3CCNC4=CC(=O)C(=O)c2c34	320.101	-1.648	-6.5	23	4	2	4	8
CHEMBL3216619	Cl.Cl.CN(C1CN=C(NC(=O)N)NC1=O)C(=O)C[C@@H](N)CS(=O)(=O)CCN	449.101	-3.098	-6.5	27	1	7	5	8
CHEMBL3247611	NCCCCCCS(=O)(=O)[C@H]1O[C@H](CO)[C@@H](O)[C@H](O)[C@@H]1O	327.135	-2.28	-7.4	21	1	8	5	8
ZINC000002390410	CC(=O)Nc1nonc1NC(=O)CSc1nc(N)cc(N)n1	324.075	-0.287	-7.9	22	2	5	4	10
ZINC000104709580	N=c1n2c3ccccc3n1CC(O)Cn1c3ccccc3n(c1=N)CC(O)C2	378.18	0.594	-6.1	28	5	0	4	8
ZINC000001591018	OC[C@H](O)Cn1cnc2c1ncnc2NO	225.086	-1.019	-6.9	16	2	4	4	8
CHEMBL25742	CN(Cc1cnc2nc(N)nc(N)c2n1)c3ccc(cc3)C(=O)NCCCP(=O)(O)O	446.158	0.518	-7.3	31	3	8	5	9
ZINC000025664516	O=S(=O)(O)C[C@H](O)COc1ccc(OC[C@H](O)CS(=O)(=O)O)cc1	386.034	-1.058	-6.5	24	1	10	4	8
CHEMBL85164	CN(C)C(=O)COC(=O)Cc1ccc(OC(=O)c2ccc(NC(=N)N)cc2)cc1.CS(=O)(=O)O	494.147	0.889	-4.1	34	2	7	4	8
CHEMBL1741544	Oc1ncc(CS(=O)(=O)Cc2cnc(O)nc2O)c(O)n1	314.032	-0.796	-7.7	21	2	4	4	10
ZINC000004265921	O=C1N=C(O)/C(=C\c2cc(/C=C3/C(=O)NC(=O)N=C3O)c([N+](=O)[O-])cc2[N+](=O)[O-])C(=O)N1	444.03	0.682	7	32	3	4	4	8
CHEMBL122330	Oc1ccc(\C=N\NC(=O)CNS(=O)(=O)c2ccc(cc2)[N+](=O)[O-])c(O)c1	394.058	0.435	-7.7	27	2	7	4	8
CHEMBL3311443	OC[C@H]1O[C@@]2(SC3=NCCN3C2=O)[C@H](O)[C@@H](O)[C@@H]1O	290.057	-2.898	-7.2	19	3	1	4	8
ZINC001560411813	CC(C)/C(N)=C(/[O])OC[C@H](CO)OCn1cnc2c1nc(N)nc2O	353.157	-0.32	-6.6	25	2	8	4	10
CHEMBL133039	[Na+].COc1ccc(CCC(=N)c2c(O)cc(OCC(=O)[O-])cc2O)cc1O	383.098	-2.055	-1.2	27	2	8	4	8
CHEMBL1530368	OC1=C2C=CC=CC2=C(O)C13Nn4c(S)nnc4N=N3	288.043	-0.05	-5.9	20	4	0	4	9
ZINC000008653118	COC(=O)c1nc(N)[nH]c(=O)c1CCCCCc1c(C(=O)OC)nc(N)[nH]c1=O	406.16	-0.454	-7.3	29	2	8	4	10
ZINC000085876748	CCN1C(=O)/C(=C\c2ccc(O[C@@H]3O[C@H](CO)[C@H](O)[C@H](O)[C@H]3O)c(OC)c2)SC1=S	457.087	0.095	-6.4	30	3	6	4	10
CHEMBL48346	CO\N=C(\C(=O)NC1CN(NCC(=O)O)C1=O)/c2csc(N)n2	342.075	-2.008	-6.7	23	2	7	4	9
CHEMBL1254938	Nc1nc(N)c2nc(CNCCc3ccc(cc3)S(=O)(=O)O)cnc2n1	375.111	0.163	-7.5	26	3	6	4	9
ZINC000096602702	O=C1c2cccc(NCS(=O)(=O)O)c2C(=O)c2cccc(NCS(=O)(=O)O)c21	426.019	0.976	-6.8	28	3	6	4	8
ZINC000001608328	CCOC(=O)[C@@H]1CS[C@H](c2c(COP(=O)(O)O)cnc(C)c2O)N1	378.065	0.972	-6	24	2	6	4	8
CHEMBL1093021	OC[C@H]1O[C@H]([C@H](O)[C@@H](O)[C@H]1O)n2cc(CCc3ccccc3)nn2	335.148	-0.964	-8.4	24	3	5	4	8
ZINC000016189558	COC(=O)/C(=N\Nc1ccccc1[N+](=O)[O-])[C@@H](O)[C@H](O)[C@H](O)CO	343.102	-1.389	-6.7	24	1	8	5	10
ZINC000025576494	CCOC(=O)NC(=S)NN1CCN(NC(=S)NC(=O)OCC)CC1	378.114	-0.325	-6.3	24	1	4	4	8
ZINC000000352331	NC1=C2NC(c3ccc([N+](=O)[O-])cc3)=NN2NN1	247.082	-0.73	-7.6	18	3	2	4	8
CHEMBL1254856	Nc1nc(N)c2nc(CNCCc3ccc(cc3)S(=O)(=O)N)cnc2n1	374.127	-0.436	-7.3	26	3	6	4	9
CHEMBL2013178	N\C(=N/O)\c1nc(Cl)c(NCC(=O)OCc2ccccc2)nc1N	350.089	0.962	-7.1	24	2	6	4	8
CHEMBL462959	O[C@H]1CC[C@H](O)[C@@H]2[C@@H]1C[C@@]34SS[C@]5(C[C@@H]6[C@@H](O)CC[C@H](O)[C@H]6N5C3=O)C(=O)N24	428.108	-0.747	-5.7	28	7	0	4	8
CHEMBL1205886	FC(F)(F)c1cc(NC(=O)c2nnn[nH]2)c(Cl)c(NC(=O)c3nnn[nH]3)c1	402.032	0.89	-7.4	27	3	4	4	8
CHEMBL1978231	NN1C(=O)C(CCO)S/C/1=N/N=C\2/SC(CCO)C(=O)N2N	348.067	-1.986	-6.4	22	2	5	4	10
ZINC000005349371	NC(=O)C[C@@H](NC(=O)CCCCSc1nc(N)nc2[nH]cnc21)C(=O)O	381.122	-0.358	-7	26	2	10	5	8
CHEMBL299992	O[C@@H]1[C@@H](O)[C@H]2OCO[C@H]2[C@H](O)[C@@H]1NC(=O)c3ccc4cc(OCC=C)c(O)cc4c3	417.142	0.046	-7.1	30	4	5	5	8
CHEMBL2028483	[Na+].OC(C(O)C(O)c1nc2ccccc2s1)C(O)C(=O)[O-]	321.028	-4.834	-7.7	21	2	5	4	8
CHEMBL319348	C\C(=C\c1ccc(OCC=C)c(NS(=O)(=O)C)c1)\C(=O)N[C@@H]2[C@H](O)[C@@H](O)[C@H]3OCO[C@H]3[C@@H]2O	484.152	-0.651	-7.2	33	3	8	5	9
CHEMBL3527332	Nc1nc(N)[n+](nc1c2cccc(Cl)c2Cl)[C@@H]3O[C@@H]([C@@H](O)[C@H](O)[C@H]3O)C(=O)[O-]	431.04	-2.368	-7.1	28	3	3	5	10
ZINC000021299258	CC(=O)[C@H](O)[C@H]1O[C@@H](n2ccc(=O)[nH]c2=O)[C@@](O)(C(C)=O)[C@@]1(O)C(C)=O	370.101	-2.976	-6.7	26	2	5	4	10
CHEMBL3307060	CCC(C(CO)Cc1c[n+](C\C(=N/O)\c2ccc(cc2)[N+](=O)[O-])cn1C)C(=O)NO	420.188	0.782	-6.2	30	2	10	4	8
CHEMBL175051	C[C@@H](O)[C@@H]1[C@H]2[C@@H](C)C(=C(N2C1=O)C(=O)O)S[C@@H]3CN[C@@H](C3)c4cc(CO)on4	409.131	0.457	-6.6	28	4	6	4	8
CHEMBL1973559	N\C(=C(/NC(=O)C(=O)N\C(=C(/N)\C#N)\C#N)\C#N)\C#N	270.061	-2.346	-6.6	20	0	2	4	8
CHEMBL3229964	CC(=O)C1=C(O)\C(=C(/O)\Nc2ccc(O)c(NS(=O)(=O)C)c2)\C(=O)OC1=O	398.042	0.43	-7.3	27	2	5	5	10
ZINC000015721753	C[C@H](NC(=O)OC(C)(C)C)C(=O)N[C@@H](C)C(=O)N[C@@H](CC(=O)O)C(=O)Nc1ccc([N+](=O)[O-])cc1	495.197	0.911	-6.7	35	1	10	5	8
CHEMBL336797	N\C(=N/O)\c1cn(COC(CO)CO)c2ncnc(N)c12	296.123	-1.565	-7.2	21	2	6	5	9
CHEMBL1962731	NC(=N)NC(=O)c1nc(Cl)c(NCCS(=O)(=O)Cc2ccccc2)nc1N	411.088	0.362	-7.4	27	2	7	5	8
ZINC000104309853	C(/C=N\NC1=NCCN1)=N/NC1=NCCN1	222.134	-1.944	-7	16	2	3	4	8
CHEMBL182002	O[C@@H]1COC2C1OCC23Nc4ccccc4[C@]5(Nc6ccccc6)C7OC[C@@H](O)C7OC35	438.179	0.844	-5.9	32	7	2	4	8
ZINC000001748574	O=c1[nH]nc(SCc2ccc(CSc3n[nH]c(=O)[nH]c3=O)cc2)c(=O)[nH]1	392.036	-0.186	-7.4	26	3	6	4	8
CHEMBL3671792	Cn1nccc1c2cc3c(N[C@@H]4C[C@@H](O)[C@@H](O)C4(C)C)c(cnn3c2)C(=O)N	384.191	0.766	-5.8	28	4	4	4	8
CHEMBL3808826	OCC(CO)(CO)Nc1nnc2nncn2n1	241.092	-2.958	-7.1	17	2	5	4	10
ZINC000002831167	Nc1cc(N)nc(SCCCSc2nc(N)cc(N)n2)n1	324.094	0.87	-7.4	21	2	6	4	10
CHEMBL1910272	Nc1ncnc2nc(NCCO)c3c(N)scc3c12	276.079	0.808	-6	19	3	3	4	8
CHEMBL1161259	Nc1ncnc2c1ncn2C3O[C@H](CO)[C@@H]([C@H]3O)S(=O)(=O)O	331.059	-2.084	-7.3	22	3	3	4	10
CHEMBL229658	O[C@H]1[C@H](O)[C@@H](N=[N+]=[N-])[C@@H](O[C@@H]2[C@@H](O)[C@H](O)[C@H](C[C@H]2N=[N+]=[N-])N=[N+]=[N-])O[C@@H]1CN=[N+]=[N-]	426.147	0.291	-6.9	30	2	7	4	10
CHEMBL180434	OCCNc1nc(NCCO)nc(Nc2ccc(cc2)[N+](=O)[O-])n1	335.134	0.332	-7.2	24	2	9	5	10
CHEMBL1712863	COc1ccc(OC)c(Cc2cnc3nc(N)nc(N)c3c2C)c1.OCCS(=O)(=O)O	451.153	0.972	-5.9	31	3	6	4	10
CHEMBL3125441	C[C@@H]1CC(O)\C=C\C(O)C(O)CC(=O)Cc2c(Cl)c(O)cc(O)c2C(=O)O1	400.092	0.841	-6	27	2	0	5	8
CHEMBL211274	CC#CCOc1ccc(cc1)S(=O)(=O)CC2(CCN(CC2)C(=O)C(C)(CO)CO)C(=O)NO	482.172	-0.032	-5.5	33	2	9	4	8
ZINC000016545179	NC(=O)C(Sc1nc2ccccc2nc1SC(C(N)=O)C(N)=O)C(N)=O	394.052	-1.508	-6	26	2	8	4	8
ZINC000002028996	CC1(C)CC(=O)C(=CC(=C(NCCO)NCCO)[N+](=O)[O-])C(=O)C1	341.159	-0.519	-5.6	24	1	8	4	8
CHEMBL3621280	ONC(=O)CNC(=O)Cn1cnc2c(NCc3ccccc3)ncnc12	355.139	0.06	-7.7	26	3	7	4	8
ZINC000003158777	OCCNc1nc2nonc2nc1NCCO	240.097	-1.179	-8.1	17	2	6	4	9
CHEMBL1967268	CC1(O)CC2(O)C=CC3=C(C(=O)c4cccc(O)c4C3=O)C2(O)C(=O)C1O	372.085	-0.815	-6.4	27	4	0	5	8
CHEMBL1871055	OC[C@H]1O[C@H]([C@H](O)[C@@H](O)[C@H]1O)c2onc(n2)c3ccc4OCCc4c3	350.111	-0.814	-7.9	25	4	3	4	9
CHEMBL302907	NC(=N)Nc1nc(CSCCNc2n[s+]([O-])nc2N)cs1	346.045	0.894	-6.3	21	2	7	5	9
ZINC000585091404	CC(C)[C@H](Nc1cc(NN)c([N+](=O)[O-])cc1[N+](=O)[O-])C(N)=O	312.118	0.71	-6	22	1	7	4	8
ZINC000038200248	Cc1ccc(NNc2nc3nonc3nc2NNC2=c3ccccc3=NC2=O)cc1	401.135	0.645	-9.3	30	5	6	4	10
CHEMBL89926	CC(O)CNc1nc(NCC(=O)N)nc2c1ncn2C	279.144	-0.947	-7.5	20	2	6	4	8
CHEMBL2132563	OC[C@H]1O[C@H]([C@H](O)[C@@H](O)[C@H]1O)c2nc(cs2)c3onc(n3)c4ccc(F)cc4	409.074	0.514	-8.4	28	4	4	4	10
ZINC001560404559	O=C(N=c1ccn([C]2O[C@H](CO)C(O)=C2O)c(O)n1)c1ccccc1	344.088	0.386	-7.2	25	3	3	4	8
CHEMBL3426103	CC(=O)N[C@@H]1[C@@H](N)[C@@H](F)[C@@](F)(O[C@H]1[C@H](O)[C@H](O)CO)C(=O)OCCCCC(F)(F)F	452.158	-0.789	-7.1	30	1	9	5	8
CHEMBL2359737	OC[C@H]1O[C@H]([C@H](O)[C@@H](O)[C@H]1O)c2nc(cs2)C(=O)Nc3cccc(c3)C(F)(F)F	434.076	0.929	-7.1	29	3	4	5	8
CHEMBL4087331	CNC(=O)[C@H]1[Se][C@H]([C@H](O)[C@@H]1O)n2cnc3c(NC4CCC4)nc(Cl)nc23	446.037	-0.083	-7.1	26	4	4	4	8
CHEMBL1162463	NC1C=C(OC[C@@H]2CP(=O)(O)CO2)N=C(N)N1O	278.078	-1.225	-6.2	18	2	3	4	8
CHEMBL3287018	CC(C)[C@H](NC(=O)c1csc(n1)c2csc(C)n2)C(=O)NCC(=O)NO	397.088	0.951	-8.2	26	2	7	4	8
ZINC000068604779	NCCN1CCCN(CCN)CCN(CCN)CCCN(CCN)CC1	372.369	-2.177	-4	26	1	8	4	8
CHEMBL3953393	NS(=O)(=O)OC[C@@H]1C[C@H](C[C@@H]1O)Nc2ncnc(N[C@@H]3c4ccccc4CC3(F)F)n2	456.139	0.988	-8.4	31	4	7	4	9
CHEMBL435920	Nc1ccc(O)c2C(=O)c3c(N)cc(c(O)c3C(=O)c12)S(=O)(=O)O	350.021	0.284	-6.5	24	3	1	5	8
CHEMBL2006192	CC(=S)NC1C(O)C(O)C(CO)OC1Oc2ccc3C(=CC(=O)Oc3c2)C	395.104	0.225	-6.6	27	3	4	4	8
ZINC000095461270	COC(=O)c1sccc1NC(=O)C(=O)NCCCc1n[nH]c(N)c1C#N	376.095	0.399	-6.7	26	2	6	4	8
CHEMBL2323133	CNC1=NS(=O)N=C1NCCSCc2oc(CN(C)C)cc2.OC(=O)C(=O)O	433.109	-0.072	-4.5	28	2	7	4	8
CHEMBL423484	CS(=O)(=O)OCC1OC(CO)C(O)C(O)C1O	272.057	-3.195	-7	17	1	4	4	8
CHEMBL38840	CCCCCOc1ccc(\C=C(/C)\C(=O)N[C@@H]2[C@H](O)[C@@H](O)[C@H]3OCO[C@H]3[C@@H]2O)cc1O	437.205	0.687	-6.5	31	3	8	5	8
ZINC000244778749	CNc1cc([C@H]2C[C@@H](NC(=O)c3c[nH]nc3-n3cnnn3)C2)nc(N)n1	355.162	-0.525	-7.9	26	4	5	4	10
CHEMBL3596416	OC[C@H]1O[C@H](OCCc2ccc(cc2)[N+](=O)[O-])[C@@H](O)[C@@H](O)[C@@H]1O	329.111	-1.046	-7.5	23	2	6	4	8
CHEMBL1990165	N.NS(=O)(=O)c1nc(c2[nH]cnc2n1)S(=O)(=O)O	296	-1.591	-1.3	18	2	2	4	8
CHEMBL2064325	Cn1cnc2cc(cnc12)c3ccc(O[C@H]4O[C@H](CO)[C@@H](O)[C@H](O)[C@@H]4O)c(Cl)c3	421.104	0.467	-7.5	29	4	4	4	9
ZINC000065734318	Nc1nc(/C(=N/O)C(=O)NCC(O)O)cs1	246.042	-1.669	-7.3	16	1	4	5	8
CHEMBL1852193	CCOc1onc(c1)c2nc(c[nH]2)[C@@H](O)[C@H](O)[C@H](O)CO	299.112	-0.789	-6.8	21	2	7	5	8
CHEMBL4059764	COc1cccc(c1)N2C(O[C@@H]3O[C@H](CO)[C@@H](O)[C@H](O)[C@H]3O)C(OC2=O)c4ccc(F)cc4	465.144	0.675	-6.7	33	4	6	4	9
ZINC000009970915	Nc1c(Cc2c(N)n(Cc3ccccc3)c(=O)[nH]c2=O)c(=O)[nH]c(=O)n1Cc1ccccc1	446.17	0.238	-6	33	4	6	4	8
CHEMBL3606098	O[C@H]1C[C@@H](O[C@@H]1COP(=O)(O)C(F)(F)P(=O)(O)O)N2C=C(F)C(=O)NC2=O	440	-0.746	-7.9	27	2	6	5	8
CHEMBL3230007	CC(=O)C1=C(O)\C(=C(/O)\Nc2cccc(NC(=O)C(=O)O)c2)\C(=O)OC1=O	376.054	0.376	-8.5	27	2	4	5	9
CHEMBL1171651	CS(=O)(=O)Nc1cccc(c1)c2ccc(O[C@H]3O[C@H](CO)[C@@H](O)[C@H](O)[C@@H]3O)cc2	425.114	-0.096	-7.1	29	3	6	5	8
CHEMBL608375	CO[C@@H]1[C@@H](O)[C@@H](O)[C@H](Oc2cc(O)c3C(=O)C(=COc3c2)NC(=O)C)OC1(C)C	409.137	0.707	-6.6	29	3	4	4	9
CHEMBL542423	Br.CN(C1CN=C(Nc2cnccn2)NC1=O)C(=O)C[C@@H](N)CCCCN	442.144	-0.374	-5	27	2	8	4	8
ZINC000033089255	COc1cc(/C=N/Nc2nnc3c(=O)[nH]c(O)nc3n2)cc(I)c1O	454.984	0.578	-7.7	25	3	4	4	10
CHEMBL2003955	Nn1c(S)nnc1CCCCCCCCc2nnc(S)n2N	342.141	1	5.2	22	2	9	4	10
CHEMBL1532877	SC1=NCCOCCN=C(S)NCCOCCOCCOCCN1	380.155	-0.183	-5.2	24	1	0	4	8
CHEMBL2303801	CS(=O)(=O)OC[C@]1(O)O[C@@H](CO)[C@@H](O)[C@H](O)[C@@H]1O	288.052	-3.875	-6.7	18	1	4	5	9
ZINC000072422602	COCCNc1nc2c(c(N[C@H](CO)c3cccnc3)n1)CCNCC2	358.212	0.764	-6	26	3	8	4	8
CHEMBL1098829	C[C@H](CNC(=O)C[C@H]1O[C@@H](CNCCNC(=N)N)[C@H]2OC(C)(C)O[C@@H]12)OC(=O)C	415.243	-1.196	-7.3	29	2	10	5	8
ZINC000084559543	CC1=C(O)C(=O)C(C2=C(O)C(=O)C(C)=C(O)C2=O)=C(O)C1=O	306.038	0.578	-6.6	22	2	1	4	8
CHEMBL151587	C[C@H](O)[C@H]1O[C@@H](Oc2ccc(\C=C(/C)\C(=O)N3CCNCC3)cc2O)[C@@H](O)[C@@H]1O	408.19	-0.566	-6.2	29	3	5	5	8
CHEMBL1208614	CCOC(CCCN)O[C@@H]1O[C@@H]([C@@H](O)[C@H](O)[C@H]1O)C(=O)O	309.142	-2.003	-6.6	21	1	8	5	8
CHEMBL1990908	C\C(=N/N=C(N)N)\c1sc(nc1C)c2nc(C)c(s2)\C(=N\N=C(N)N)\C	392.131	0.878	-7.1	26	2	5	4	8
CHEMBL489475	[Na+].O[C@H]1C=C2[C@@H](NC(=O)c3c(O)c4OCOc4cc23)[C@H](OS(=O)(=O)[O-])[C@@H]1O	409.008	-4.799	-6.5	27	4	2	4	10
CHEMBL4112800	N[C@H](CCP(=O)(O)C(O)c1ccc(SCC(=O)O)c(c1)[N+](=O)[O-])C(=O)O	408.039	0.835	-8	26	1	10	5	8
ZINC000033728452	CCOC(=O)C1=C(C)N=C(NN)N[C@@H]1c1ccc(O)c(OC)c1	320.148	0.702	-6.7	23	2	4	4	8
ZINC000100023235	O/N=C1\c2nn[nH]c2/C(=N\O)c2nn[nH]c21	220.046	-1.311	-9	16	3	0	4	8
CHEMBL3221803	O[C@@H]1C[C@@](O)(C=C([C@H]1O)c2cn(nn2)c3cccnc3)C(=O)O	318.096	-1.013	-7.9	23	3	3	4	8
CHEMBL2062295	CN(C)C(=S)SCCn1c(C)ncc1[N+](=O)[O-].OC(C(O)C(=O)O)C(=O)O	424.072	-0.443	-5.9	27	1	7	4	10
CHEMBL3392251	CC(C)NC(=O)Nc1ccnc(n1)c2cc[n+]([O-])cc2.CS(=O)(=O)O.CS(=O)(=O)O	465.099	0.315	-4.1	30	2	3	4	8
CHEMBL403748	CC1=N[C@@H]2[C@@H](O)[C@@H](O)[C@@H](CO)O[C@]2(CN)S1.OC(=O)C(F)(F)F	362.076	-1.079	-5.1	23	2	2	5	8
CHEMBL1159472	OC[C@H]1OC(Oc2ccc(cc2)[N+]#N)[C@H](O)[C@@H](O)[C@@H]1O.[O-]C(=O)C(F)(F)F	396.078	-1.352	6.8	27	2	3	4	9
CHEMBL593692	OC[C@H]1O[C@@H](NC(=O)c2cc(Br)c3OCCOc3c2)[C@H](O)[C@@H](O)[C@@H]1O	419.022	-1.25	-7.1	25	3	3	5	8
ZINC000031460590	O=C(O)[C@H]1O[C@@H](O[C@@H]2N=C(c3ccccc3)c3cc(Cl)ccc3NC2=O)[C@H](O)[C@@H](O)[C@@H]1O	462.083	0.364	-6.7	32	4	4	5	8
CHEMBL424000	[Na+].Nc1nc(cc(c2cccc(NC(=O)C(O)CCC(=O)[O-])c2)c1C#N)c3ccc(O)cc3	454.125	-1.591	1.2	33	3	7	4	8
CHEMBL1985758	Br.C1CNOCCCONCCCNOCCCONC1	372.137	0.223	-6.4	21	1	0	4	8
CHEMBL1392460	NC1=C(C#N)C2(C(=O)Nc3ccccc23)c4c(O)nc(S)nc4O1	339.043	0.795	-5.4	24	4	0	4	8
CHEMBL340488	C[C@H](N)C(=O)NS(=O)(=O)OC[C@H]1O[C@H]([C@H](O)[C@@H]1O)c2nc(cs2)c3ccccc3	443.082	-0.303	-7.2	29	3	7	4	10
CHEMBL2442701	N\C(=N\O)\c1ccc(cn1)c2cncc(n2)c3ccc(nc3)\C(=N\O)\N	350.124	0.79	-7.9	26	3	4	4	8
ZINC000017721961	C[C@H](O)C(=O)C1=NC2=C(O)N=C(N)NC2=NC1	237.086	-1.566	-7	17	2	2	4	8
CHEMBL320025	CN(CC(=O)O)NC(=O)C[C@H](N)c1csc(CNC(=O)OC(C)(C)C)n1	387.158	0.605	-6.7	26	1	8	4	8
CHEMBL164780	COC1OC(CO)C(Sc2nc(CO)ccc2O)C(O)C1O	333.088	-1.174	-6.5	22	2	5	5	9
CHEMBL243211	Nn1c(S)nnc1Cc2csc(NCCC(=O)O)n2	300.046	0.214	-7.2	19	2	6	4	9
ZINC000016382819	Nc1nnc(/N=[N+](\[O-])c2n[nH]c(N)n2)[nH]1	210.073	-0.987	-7	15	2	2	4	8
CHEMBL454100	CCN(CC)\[N+](=N\O[C@@H]1O[C@H](CO)[C@@H](O)[C@H](O)[C@H]1O)\[O-]	295.138	-2.063	-6.5	20	1	6	4	8
CHEMBL95745	NC1=NC(=N)C2C(N=CN2COCCO)C(=N1)N.OS(=O)(=O)C(F)(F)F	403.089	-1.909	-5.8	26	2	4	5	10
CHEMBL609498	NC(CCC(=O)O)C(=O)OC[C@H]1OC(O)[C@H](O)[C@@H]1O	279.095	-2.839	-7.4	19	1	6	5	8
CHEMBL528475	CCCCCc1cnc2nc(N)nc(N)c2c1.OCCS(=O)(=O)O	357.147	0.788	-4.7	24	2	6	4	8
CHEMBL608390	OC[C@H]1O[C@@]2(CC(=NO2)c3ccc(cc3)[N+](=O)[O-])[C@H](O)[C@@H](O)[C@@H]1O	340.091	-1.111	-7.4	24	3	3	4	9
CHEMBL3302354	Cn1cc(NC(=O)c2cc(NC(=O)c3cc(cn3C)[N+](=O)[O-])cn2C)cc1C(=O)NCC(=N)N	469.182	0.781	-7.4	34	3	8	5	9
CHEMBL376029	CN(C)c1nc(nc(n1)N2C[C@H](N)C[C@H](N)C2)N3C[C@H](N)C[C@H](N)C3	350.265	-2.333	-6	25	3	3	4	10
CHEMBL3139276	CN(C1CN=C(NC(=O)N)NC1=O)C(=O)C[C@@H](N)c2cc(CN)on2	352.161	-2.496	-7.7	25	2	5	5	8
CHEMBL1989578	COc1ccc(cc1)C2C(=C(S)N(C3OC(CO)C(O)C(O)C3O)C(=C2C(=O)C)C)C#N	462.146	0.422	-4.7	32	3	5	5	10
CHEMBL1193540	NC1=NCN(C(=N1)N)c2cccc(\C=C\c3cccc(c3)N4CN=C(N)N=C4N)c2	402.203	0.671	-7.9	30	4	4	4	10
CHEMBL17844	CC(C)(C)NCC(O)COc1nsnc1NCCO	290.141	0.07	-6.3	19	1	8	4	8
ZINC000244866646	Nc1nc(NCCSc2ncn[nH]2)cc([C@H]2C[C@@H](O)C2)n1	307.122	0.619	-7.3	21	3	6	4	8
CHEMBL2104121	[Cl-].Cc1ncc(C[n+]2csc(CCOP(=O)(O)OP(=O)(O)O)c2C)c(N)n1	460.014	-2.154	-1	27	2	8	4	8
ZINC000006016588	COC(=O)C(C(=O)CSc1nnc(O)[nH]c1=O)=C1Nc2ccccc2N1	375.064	0.454	-7.3	26	3	5	4	10
ZINC000301054517	CC(=NN1CN([C@@H](C)C(=O)O)P(N(CCO)CCO)NC1=N)c1cccs1	416.14	0.558	-6.2	27	2	9	5	8
CHEMBL3934281	Cc1cc(N\C(=N/O)\c2nonc2NCCNS(=O)(=O)C)ccc1F	372.102	0.726	-7.9	25	2	7	4	8
[truncated: 127 more rows]

## Sheet: Dihydrofolate reductase
ID	SMILES	MW	logP	Affinity score	numAtoms	numRings	numRotBonds	numHDon	numHAcc
[truncated: 956 more rows]

[truncated: 1 more sheets: Methionine Aminopeptidase]
