# Supplementary material for: Identification of Potential Druggable Targets and Structure-Based Virtual Screening for Drug-like Molecules against the Shrimp Pathogen Enterocytozoon hepatopenaei
Source: Int J Mol Sci. 2023 Jan 11;24(2):1412. doi: 10.3390/ijms24021412 (PMC9867128; doi:10.3390/ijms24021412)
Supplement: Supplementary file 1 [file ijms-24-01412-s001.zip › Table S2.xlsx]

## Sheet: Aquaporin
Table S2. Compounds selected following ADMET screening.
ID	SMILES	MW	logP	Affinity	Number of bonds	numAtoms	numRings	numRotBonds	numHDon	numHAcc
ZINC000108318172	O=S1(=O)NC[C@H](O)CNC[C@@]2(COc3cc(-c4ccccc4)ccc31)C[C@H](O)[C@H](O)C2	448.167	0.477	-9.3	5	22	3	5	4	10
ZINC000108318223	O=S1(=O)NC[C@H](O)CNC[C@@]2(COc3cc(-c4cccnc4)ccc31)C[C@H](O)[C@H](O)C2	449.162	-0.128	-8.8	9	13	1	2	4	7
CHEMBL1974284	NC(=O)N\N=C(/CC1=CC(=O)Oc2cc(O)ccc12)\C(=O)Nc3ccccc3C(=O)N	423.118	0.803	-8.7	8	34	7	2	4	8
CHEMBL1735751	COc1ccc(NS(=O)(=O)c2cc(NN=C3C(=O)NC(=O)NC3=O)ccc2Cl)cc1	451.035	1.283	-8.5	11	25	3	6	4	7
CHEMBL2443235	OC1=CC(=C(NC1=O)c2ccc(cc2)c3nnn[nH]3)c4ccc(cc4)c5nnn[nH]5	399.119	1.775	-8.5	9	20	2	2	4	8
CHEMBL3329574	Cc1ccc(cc1)S(=O)(=O)Nc2cccc(\C=C\C(=O)C[C@@H]3OC[C@@H](O)[C@H](O)[C@H]3O)c2	447.135	1.25	-8.4	6	20	2	5	5	7
CHEMBL2260249	NC(=N)NS(=O)(=O)c1ccc(NNc2ncnc3ccccc23)cc1	357.101	1.241	-8.3	9	28	1	8	5	7
CHEMBL3703816	CCn1cc2cc(Cc3cc(ccc3Cl)[C@@H]4O[C@H](CO)[C@@H](O)[C@H](O)[C@H]4O)ccc2n1	432.145	1.815	-8.2	3	26	2	6	5	10
CHEMBL258745	OP(=O)(O)Oc1ccc(CNC(=O)CC2=CC(=O)Oc3cc(OP(=O)(O)O)ccc23)cc1	485.028	1.595	-8.2	9	20	3	2	4	7
CHEMBL3229995	CC(=O)Nc1cc(NC(=O)C)cc(N\C(=C\2/C(=O)OC(=O)C(=C2O)C(=O)C)\O)c1	403.102	1.269	-8.1	11	20	3	4	5	7
CHEMBL1459241	COc1ccccc1Oc2c[nH]nc2c3ccc(OCC(=O)NN)cc3O	370.128	1.952	-8.1	7	29	4	6	4	8
CHEMBL462045	CN1C(=O)C(=C(N=C1C(C)(C)NC(=O)c2c[nH]cn2)C(=O)NCc3ccc(F)cc3)O	428.161	0.943	-8.1	9	25	3	3	4	8
CHEMBL3703838	OC[C@H]1O[C@H]([C@H](O)[C@@H](O)[C@@H]1O)c2ccc(Cl)c(Cc3ccc4OCCS(=O)(=O)c4c3)c2	470.08	0.612	-8	9	25	2	5	5	7
CHEMBL475140	NC(=O)N1Cc2c(O)c3OCOc3cc2C4=C[C@H](O)[C@@H](O)[C@@H](O)[C@H]14	336.096	-1.137	-8	9	24	2	6	5	9
CHEMBL1552392	Oc1nnc(C(=O)NNC(=O)CNC(=O)c2oc(Br)cc2)c3ccccc13	433.002	0.882	-7.9	9	31	4	3	5	10
ZINC000004932059	O=c1cc(CO)oc(C(c2ccc(F)cc2)c2oc(CO)cc(=O)c2O)c1O	390.075	1.308	-7.9	10	23	2	5	5	7
ZINC000044699305	Cc1cc(=O)oc2cc(O[C@H]3O[C@H](CO)[C@@H](O)[C@H](O)[C@H]3NS(=O)(=O)O)ccc12	417.073	-1.32	-7.8	11	27	2	7	4	7
CHEMBL551452	OC[C@H]1O[C@@H](S\C(=N/O)\c2ccc(cc2)c3ccccc3)[C@H](O)[C@@H](O)[C@@H]1O	391.109	1.022	-7.8	9	25	2	2	4	8
CHEMBL3139276	CN(C1CN=C(NC(=O)N)NC1=O)C(=O)C[C@@H](N)c2cc(CN)on2	352.161	-2.496	-7.8	9	21	3	3	4	9
ZINC000095480920	O=c1cc(CO)oc(C(c2cccc(OC(F)F)c2)c2oc(CO)cc(=O)c2O)c1O	438.076	1.77	-7.8	9	21	2	6	4	8
CHEMBL48497	NC(=N)c1cccc(Oc2c[n+]([O-])cc(Oc3cccc(n3)C(=N)N)n2)c1	365.124	1.263	-7.8	9	23	3	5	5	10
ZINC000005537127	N#Cc1cc2c(n([C@H]3O[C@@H](CO)[C@@H](O)[C@@H](O)[C@@H]3O)c1=S)CCCCCC2	380.141	0.721	-7.7	9	26	3	6	5	9
ZINC000009518205	Nc1nc(SCC(=O)NCc2ccco2)[nH]c(=O)c1NC(=O)c1ccc(F)c(F)c1	435.081	1.884	-7.7	10	27	5	1	4	9
ZINC000020135017	Cc1ccc(NC(=O)C[C@@H]2SC(NC3(c4c(O)[nH]c(=O)[nH]c4=O)CCCC3)=NC2=O)cc1	457.142	1.463	-7.7	9	30	3	7	4	7
CHEMBL113696	O=C1NC(=O)C(C(C2C(=O)NC(=O)NC2=O)c3ccnc4ccccc34)C(=O)N1	395.087	-0.717	-7.7	10	24	2	6	5	9
CHEMBL3920846	O=C(NC1CCNC1)c2cc(cs2)c3cc(NC4CC4)n5ncc(\C=C\6/NC(=O)NC6=O)c5n3	478.154	1.304	-7.7	9	27	3	6	4	9
CHEMBL3229854	CCNC(=O)c1cccc(N\C(=C\2/C(=O)OC(=O)C(=C2O)C(=O)C)\O)c1	360.096	1.102	-7.7	10	25	3	6	5	7
ZINC000016681968	CCOC(=O)/C(C(=O)Nc1ccccc1)=C(\N)NNc1ccccc1[N+](=O)[O-]	385.139	1.883	-7.7	9	25	3	4	4	9
CHEMBL3238479	[NH3+]c1cc(cc2C=C(\C(=N\Nc3ccc(cc3F)C(=O)O)\C(=O)c12)S(=O)(=O)O)S(=O)(=O)[O-]	485	0.195	-7.7	9	25	3	3	4	7
ZINC000001748569	O=c1[nH]nc(SCc2ccccc2CSc2n[nH]c(=O)[nH]c2=O)c(=O)[nH]1	392.036	-0.186	-7.7	9	29	2	5	5	9
CHEMBL4069291	CSc1ccc(C(=O)O)c2nc3cccc(O[C@@H]4O[C@@H](C)[C@H](O)[C@@H](O)[C@H]4O)c3nc12	432.099	1.409	-7.6	10	33	4	4	4	7
CHEMBL595745	CS(=O)(=O)c1ccc2NNC(=C(Nc3cncc(Cl)c3)c2c1)C(=O)N	379.051	1.335	-7.6	5	27	3	4	4	7
ZINC000096576707	CCOC(=O)c1[nH]c(=O)[nH]c1CC1(Cc2[nH]c(=O)[nH]c2C(=O)OCC)C(=O)CC(C)(C)CC1=O	476.191	0.803	-7.6	10	26	3	6	4	8
ZINC000252625980	NC(=O)c1cc(NN=C2C(N)=NN(c3ccccc3)C2=O)cc(C(N)=O)c1	365.124	-0.029	-7.6	9	27	4	3	4	8
ZINC000012705758	C[C@@H](C(=O)NCc1ccccc1)N(C(=O)c1snc(C(N)=O)c1N)c1cccc(O)c1	439.131	1.881	-7.6	9	23	2	6	5	7
CHEMBL3237581	CC(C)c1nc(Nc2cc(NCCN)nnc2C(=O)N)ccc1F	333.171	1.347	-7.6	9	32	4	2	5	8
CHEMBL496156	OP(=O)(O)C(C(C1SC(=S)NC1=O)c2ccccc2[N+](=O)[O-])P(=O)(O)O	441.946	0.876	-7.6	20	28	5	2	4	8
CHEMBL1444407	Nc1ccc(cc1)S(=O)(=O)NNC(=O)C(=O)NNc2ccccn2	350.08	-0.883	-7.6	9	26	2	8	5	7
CHEMBL1090033	OC[C@H](O)[C@@H](O)[C@@H](O)[C@H](CNC(=O)c1ccccc1)c2ccc3OCOc3c2	389.147	0.004	-7.6	9	22	2	5	4	7
ZINC000253433319	Cc1[nH]nc(C(=O)NC[C@H](NC(=O)c2n[nH]c(C)c2[N+](=O)[O-])c2ccccc2)c1[N+](=O)[O-]	442.135	1.467	-7.6	9	19	3	3	4	8
ZINC000009060121	Nc1c(NCCO)cc(NCCO)c2c1C(=O)c1ccccc1C2=O	341.138	0.853	-7.6	9	20	2	3	4	8
ZINC000002243083	O=S(=O)(O)c1cc2cc(S(=O)(=O)O)c(O)cc2c(S(=O)(=O)O)c1	383.928	0.286	-7.6	9	32	3	8	5	9
CHEMBL1962822	CCOC(=O)CCNc1nc(N)c(nc1Cl)C(=O)NC(=N)N	329.1	-0.299	-7.6	9	22	1	8	5	7
CHEMBL133039	[Na+].COc1ccc(CCC(=N)c2c(O)cc(OCC(=O)[O-])cc2O)cc1O	383.098	-2.055	-7.6	9	24	2	7	4	7
CHEMBL1206766	C[C@]1(COC(=O)Cc2ccc(O)c(O)c2)[C@@H](N3C(\C(=C/C(=O)O)\C3=O)S1(=O)=O)C(=O)O	455.052	-0.997	-7.6	9	23	4	5	5	8
CHEMBL3216187	Cl.Cl.CN(C1CN=C(NC(=O)N)NC1=O)C(=O)C[C@@H](N)c2cc(CN)on2	424.114	-1.652	-7.6	11	23	3	5	4	9
CHEMBL3672877	CC(C)(Cc1ccc(s1)C(=O)Oc2ccc(cc2F)C(=N)N)C(=O)NCc3nnn[nH]3	445.133	1.789	-7.6	9	26	2	5	4	9
CHEMBL374308	CC(C)[C@H](O)[C@]1(NC(=O)[C@H](C)[C@@H]1O)C(=O)SC[C@H](NC(=O)C)C(=O)O	376.13	-1.282	-7.5	11	22	3	3	5	8
CHEMBL3144294	NS(=O)(=O)NC(=O)OC[C@H]1O[C@H](C[C@@H]1O)N2C=CC(=O)NC2=O	350.053	-2.885	-7.5	9	19	0	8	5	9
CHEMBL390487	COc1cc(CCOc2cc(O)c3C(=O)C=C(Oc3c2)C(=O)O)ccc1NC(=O)C(=O)O	443.085	1.85	-7.5	9	23	2	5	4	7
CHEMBL3633193	NC(=O)CNc1ncnc(Nc2ccc(cc2)C(=N)N)c1[N+](=O)[O-]	330.119	0.31	-7.5	11	37	6	4	4	8
CHEMBL1183718	CN(C1CN=C(NC(=O)N)NC1=O)C(=O)C[C@@H](N)c2csc(CCN)n2	382.154	-1.985	-7.5	10	19	2	3	4	7
ZINC000008431404	CCOC(=O)NC(=O)C(=CNc1ccc(NC(C)=O)cc1)C(=O)NC(=O)OCC	406.149	1.486	-7.5	9	23	3	4	4	10
ZINC000100101821	Cc1ccc(N2C(=O)NC(=O)/C(=C/NC(CO)(CO)CO)C2=O)cc1C	363.143	-0.925	-7.5	8	23	2	7	5	8
CHEMBL610231	O[C@@H]1[C@H](O)C(O[C@H]1COP(=O)(O)O)n2cnc3c(O)nc(nc23)C(F)(F)F	416.034	-0.721	-7.5	9	31	4	7	4	7
ZINC000252618412	C[C@@H]1O[C@H](Nc2ccc(S(=O)(=O)O)cc2)[C@H](O)[C@@H](O)[C@@H]1O	319.073	-0.827	-7.5	9	25	3	4	4	8
CHEMBL3140193	OC[C@H]1O[C@@H](S\C(=N/OS(=O)(=O)O)\c2cccc(Cl)c2Cl)[C@H](O)[C@@H](O)[C@@H]1O	462.957	0.008	-7.5	9	21	2	3	4	7
CHEMBL1196329	CC(C)C[C@H](NC(=O)C(O)C1OC(=O)CC1N)[C@@H]2Cc3cccc(O)c3C(=O)O2	406.174	0.008	-7.5	9	22	2	4	4	8
CHEMBL590271	OC[C@H]1O[C@H]([C@H](O)[C@@H](O)[C@@H]1O)c2ccc(Cl)c(Cc3nnc(s3)c4cscn4)c2	455.038	1.421	-7.5	9	23	2	4	4	9
ZINC000067561917	Cc1nn2cc(CNC(=O)C3=C(C)NC(=O)N[C@@H]3c3[nH]cnc3C)nc2s1	386.127	1.075	-7.5	9	18	2	3	4	7
ZINC000095346118	O=C(O)[C@@H](CS(=O)(=O)O)N/C=C1\C(=O)NC(=O)N(c2ccc(Br)cc2)C1=O	460.953	-0.154	-7.5	10	24	3	4	5	7
ZINC000009316030	Oc1ncnc(O)c1C(c1cccs1)c1c(O)ncnc1O	318.042	1.331	-7.5	10	35	5	2	4	7
CHEMBL3211188	Cc1cc(Cl)ccc1OCC(=O)N\N=C\c2ccc(OC3OC(CO)C(O)C(O)C3O)cc2	480.13	0.356	-7.5	9	28	3	3	4	8
CHEMBL4087352	Cc1cnc(nc1)c2ccc(cc2)C(=O)N[C@H](C(=O)NO)C(C)(C)NS(=O)(=O)C	421.142	0.384	-7.5	9	30	3	6	4	8
CHEMBL3764497	OCc1c(O)c(ncc1CS(=O)(=O)Cc2ccc(F)cc2)C(=O)NO	370.063	0.653	-7.5	9	24	3	5	4	9
ZINC000001590129	CCOC(=O)N[C@@H](c1ccccc1[N+](=O)[O-])[P@](=O)(O)Nc1ncn[nH]1	370.079	1.755	-7.5	10	24	3	5	4	8
CHEMBL3897403	O=C1NC(=O)\C(=C\c2cnn3c(NC4CC4)cc(Nc5ccc(cn5)n6ccnc6)nc23)\N1	442.161	1.808	-7.5	9	25	3	7	4	7
CHEMBL191020	Oc1ccc(\C=C\S(=O)(=O)CS(=O)(=O)\C=C\c2ccc(O)c(O)c2)cc1O	412.029	1.938	-7.5	11	27	3	6	4	10
CHEMBL1962616	NC(=N)NC(=O)c1nc(Cl)c(NCc2ccncc2)nc1N	320.09	0.343	-7.5	9	34	4	7	5	8
CHEMBL1192698	CN(C)CCn1nc2c3c(O)ccc(O)c3C(=O)c4c(NCCN)ccc1c24	381.18	1.591	-7.5	9	23	1	7	4	7
CHEMBL260778	OC(=O)[C@@H](Cc1cc(O)c(O)cc1[N+](=O)[O-])OC(=O)\C=C\c2ccc(O)c(O)c2	405.07	1.669	-7.5	9	28	3	7	4	7
CHEMBL489127	COC(=O)\C=C\[C@H](O)[C@H](O)C1=C(C)C(=O)[C@@]2(O1)[C@@H](O)[C@](NC2=O)(OC)C(=O)c3ccccc3	461.132	-1.234	-7.5	10	25	3	7	4	7
CHEMBL2132563	OC[C@H]1O[C@H]([C@H](O)[C@@H](O)[C@H]1O)c2nc(cs2)c3onc(n3)c4ccc(F)cc4	409.074	0.514	-7.5	9	30	3	8	5	7
CHEMBL328015	CC(C)[C@H](NC(=O)OCc1ccccc1)C(=O)N[C@@H](C)C(=O)N[C@H]2CC(=O)OC2O	421.185	0.192	-7.5	9	27	3	4	4	8
ZINC000072370078	O=C(O)c1cccc(/C=N/CC(O)C/N=C/c2cccc(C(=O)O)c2O)c1O	386.111	1.393	-7.5	9	31	4	5	4	7
CHEMBL3934897	NC(=O)[C@@H](O)CNc1cc(nc(n1)c2ccc(Oc3ccc(F)cc3)cc2)C(=O)N	411.134	1.432	-7.5	9	30	4	5	5	9
ZINC000534584515	CC(C)N=c1cc(-c2ccc(C(=O)NCc3nn[nH]n3)cc2)nc(N)[nH]1	353.171	0.411	-7.5	9	27	3	5	4	7
ZINC000217878099	CCOC(=O)c1c[nH]c(=O)c([C@@H](CC(=O)O)c2cc(OC)c(O)c(OC)c2)c1O	407.122	1.587	-7.5	9	24	3	4	5	7
CHEMBL3109642	CC1=C[C@H](N2C[C@@H]1N(OS(=O)(=O)O)C2=O)C(=O)NCC3=CC(=O)C(=CN3)O	400.069	-1.134	-7.5	9	32	4	8	4	7
CHEMBL1254925	N\C(=N/O)\c1ccc(cc1)C(=O)CS(=O)(=O)c2ccc(cc2)\C(=N\O)\N	376.084	0.532	-7.5	9	26	3	8	5	7
ZINC000223476269	Nc1cc(O)nc(CCNC(=O)c2cc(=O)n(-c3ccccc3)[nH]2)n1	340.128	0.216	-7.5	9	25	2	6	5	10
ZINC000058165880	CNc1ccc(S(=O)(=O)NC)cc1NS(=O)(=O)c1ccc(S(=O)(=O)NC)cc1	448.054	0.345	7.5	9	28	2	8	4	7
CHEMBL1243239	OC[C@H]1O[C@@H](Oc2cccc(Cl)c2Cc3cnn(c3)c4ccccc4)[C@H](O)[C@@H](O)[C@@H]1O	446.124	1.295	-7.7	9	31	4	6	4	8

## Sheet: CTP Synthase
ID	SMILES	MW	logP	Affinity	Number of bonds	numAtoms	numRings	numRotBonds	numHDon	numHAcc
ZINC000101268500	N=C(N)NS(=O)(=O)c1ccc(NC=C2C(=O)OC3(CCCCC3)OC2=O)cc1	408.11	0.915	-9.8	9	28	3	4	4	8
CHEMBL1207111	O=C(Nc1cc(NC(=O)c2nnn[nH]2)cc(c1)C#N)c3nnn[nH]3	325.078	-0.911	-9.7	12	24	3	4	4	9
CHEMBL498038	[Na+].Nc1cc(Nc2cc(c(N)c3C(=O)c4ccccc4C(=O)c23)S(=O)(=O)[O-])cc(c1)C(=O)O	475.045	-1.024	-9.6	9	33	4	4	4	9
CHEMBL48494	NC1C(O)C(O)C(O)OC1OCc2ccc3C(=O)c4ccccc4C(=O)c3c2	385.116	-0.298	-9.6	11	28	4	3	4	8
CHEMBL3248258	CC(=O)C1=C(O)\C(=C(/C)\Nc2cccc(c2)C(=O)NC3C(=O)NC(=O)NC3=O)\C(=O)OC1=O	456.092	-0.679	-9.5	11	33	3	5	5	10
CHEMBL1207655	NC(=O)c1cc(NC(=O)c2nnn[nH]2)cc(NC(=O)c3nnn[nH]3)c1	343.089	-1.684	-9.3	11	25	3	5	5	9
ZINC000001748569	O=c1[nH]nc(SCc2ccccc2CSc2n[nH]c(=O)[nH]c2=O)c(=O)[nH]1	392.036	-0.186	-9.2	9	26	3	6	4	8
CHEMBL3973556	NS(=O)(=O)OC[C@H]1C[C@@H](Nc2cc(N[C@@H]3CCC[C@H]3OCc4ccccc4)ncn2)[C@H](O)[C@@H]1O	493.2	0.769	-9.1	11	34	4	10	5	10
CHEMBL3703838	OC[C@H]1O[C@H]([C@H](O)[C@@H](O)[C@@H]1O)c2ccc(Cl)c(Cc3ccc4OCCS(=O)(=O)c4c3)c2	470.08	0.612	-9.1	9	31	4	4	4	8
CHEMBL591950	OC[C@H]1O[C@H]([C@H](O)[C@@H](O)[C@@H]1O)c2ccc(Cl)c(Cc3nnc(s3)c4ccnnc4)c2	450.076	0.754	-9	9	30	4	5	4	10
CHEMBL3642922	CC(Cc1oc(cc1)C(=O)Oc2ccc(cc2)C(=N)N)C(=O)N[C@@H](CS(=O)(=O)O)C(=O)O	467.1	0.419	-8.9	11	32	2	10	5	8
ZINC000102754519	O=C(O)CN1C(=O)N[C@@H]2O[C@@H]([C@@H]3O[C@H]4NC(=O)N(CC(=O)O)[C@H]4O3)O[C@H]21	374.071	-2.744	-8.8	9	26	4	5	4	8
CHEMBL3248765	O=C(Nc1nnn[nH]1)C2=CC(=O)c3cc(ccc3O2)C(=O)Nc4nnn[nH]4	368.073	-0.676	-8.7	9	27	4	4	4	10
CHEMBL374789	N[C@@H]1C[C@H](N)CN(C1)c2nc(Nc3ccc(F)cc3)nc(n2)N4C[C@H](N)C[C@H](N)C4	416.256	-0.516	-8.7	9	30	4	4	5	10
CHEMBL1205890	Clc1c(NC(=O)c2nnn[nH]2)cc(cc1NC(=O)c3nnn[nH]3)C#N	359.039	-0.258	-8.7	9	25	3	4	4	9
CHEMBL1790577	COc1ccc(CC(N)C(=O)N[C@@H]2[C@@H](CO)C[C@H]([C@@H]2O)n3cnc4c(ncnc34)N(C)C)cc1	469.244	-0.13	-8.6	7	34	4	8	4	10
CHEMBL1162979	[Na+].OC[C@H]1O[C@@H](Cc2cc(O)cc(\C=C/c3ccc(O)cc3)c2)[C@H](O)[C@@H](OS(=O)(=O)[O-])[C@@H]1O	490.091	-2.858	-8.6	16	33	3	7	5	10
CHEMBL83923	CC(N(Cc1cc(cc2nc(O)c(O)nc12)[N+](=O)[O-])C(=O)C)P(=O)(O)O	386.063	0.821	-8.6	11	26	2	5	4	8
CHEMBL552354	COc1ccc(cc1)C2=NN\C(=N/N=C/C(O)C(O)C(O)CO)\C(=C2)Cc3ccccc3OC	468.201	0.646	-8.6	9	34	3	10	5	9
CHEMBL3621280	ONC(=O)CNC(=O)Cn1cnc2c(NCc3ccccc3)ncnc12	355.139	0.06	-8.6	9	26	3	7	4	8
CHEMBL141123	CC1=CN(C2CC(=C)C(COP(=O)(O)OP(=O)(O)OP(=O)(O)O)O2)C(=O)NC1=O	477.994	0.032	-8.5	9	29	2	8	5	10
ZINC000008618451	CN(C)[C@@H]1C(O)=C(C(N)=O)C(=O)[C@@]2(O)C(=O)c3c(O)c4c(O)cccc4cc3C[C@H]12	412.127	0.147	-8.5	9	30	4	2	5	8
CHEMBL280929	CC1OC(OC2CCCCC2OC(=O)N3CCC(CC3)(C(=O)O)C(=O)O)C(O)C(O)C1O	461.19	-0.47	-8.5	11	32	3	5	5	9
CHEMBL593692	OC[C@H]1O[C@@H](NC(=O)c2cc(Br)c3OCCOc3c2)[C@H](O)[C@@H](O)[C@@H]1O	419.022	-1.25	-8.5	10	25	3	3	5	8
ZINC000002689496	Nc1ccc(S(=O)(=O)NC(=O)CCCCC(=O)NS(=O)(=O)c2ccc(N)cc2)cc1	454.098	0.721	-8.5	10	30	2	9	4	8
CHEMBL3642961	NC(=N)c1ccc(OC(=O)c2ccc(CCC(=O)N[C@@H](CS(=O)(=O)O)C(=O)O)s2)c(F)c1	487.052	0.78	-8.5	11	32	2	10	5	8
CHEMBL3229964	CC(=O)C1=C(O)\C(=C(/O)\Nc2ccc(O)c(NS(=O)(=O)C)c2)\C(=O)OC1=O	398.042	0.43	-8.5	13	27	2	5	5	10
ZINC000005496158	OC[C@@H](O)[C@@H](O)[C@H](O)c1nn(-c2ccccc2)c2nc3ccccc3nc12	366.133	0.716	-8.4	10	27	4	5	4	8
ZINC000244778749	CNc1cc([C@H]2C[C@@H](NC(=O)c3c[nH]nc3-n3cnnn3)C2)nc(N)n1	355.162	-0.525	-8.4	9	26	4	5	4	10
CHEMBL610629	OC[C@H]1O[C@@H](NC(=O)C2=COc3ccccc3O2)[C@H](O)[C@@H](O)[C@@H]1O	339.095	-1.785	-8.4	9	24	3	3	5	8
CHEMBL1093839	OS(=O)(=O)c1ccccc1\C=N\NC(=O)C(=O)N\N=C\c2ccccc2S(=O)(=O)O	454.025	-0.22	-8.4	12	30	2	6	4	8
CHEMBL1192127	Cn1cc(NC(=O)Cn2ccnc2[N+](=O)[O-])cc1C(=O)NCCC(=N)N	362.145	-0.176	-8.4	9	26	2	8	4	8
CHEMBL1086192	OC[C@H]1O[C@H]([C@H](O)[C@@H](O)[C@@H]1O)c2ccc(Cl)c(Cc3ccc(OC4CCOCC4)nn3)c2	466.151	0.793	-8.4	9	32	4	6	4	9
ZINC000244882463	Nc1nnnn1CC(=O)N[C@H]1C[C@@H](c2cc(NCCO)ncn2)C1	333.166	-1.488	-8.3	9	24	3	7	4	10
CHEMBL3208034	Oc1cccc(\C=N\NC(=O)Cc2nnc(O)nc2O)c1	289.081	-0.319	-8.3	9	21	2	4	4	8
CHEMBL1205886	FC(F)(F)c1cc(NC(=O)c2nnn[nH]2)c(Cl)c(NC(=O)c3nnn[nH]3)c1	402.032	0.89	-8.3	9	27	3	4	4	8
CHEMBL3273014	C[C@H](NC(=O)C)C(=O)N[C@@H](C)C(=O)N1CCC[C@H]1C(=O)NN(C)C(=O)O[C@@H](C)C(=O)N(C)N	471.244	-2.173	-8.3	8	33	1	7	4	8
CHEMBL133039	[Na+].COc1ccc(CCC(=N)c2c(O)cc(OCC(=O)[O-])cc2O)cc1O	383.098	-2.055	-8.3	12	27	2	8	4	8
CHEMBL3805395	COC(=O)[C@@H](NC(=O)CNc1nc(NC(=O)C)nc2[nH]cnc12)C(C)C	363.166	0.037	-8.3	10	26	2	7	4	8
CHEMBL4086367	CC(C)(NS(=O)(=O)C)[C@H](NC(=O)c1ccc(cc1)c2oc3ncncc3c2)C(=O)NO	447.121	0.821	-8.3	9	31	3	7	4	8
CHEMBL2010347	OP(=O)(O)OCN1C(=O)C2C3C=CC(C4C3C5C4C(=O)N(COP(=O)(O)O)C5=O)C2C1=O	492.033	-1.616	-8.3	9	32	6	6	4	8
CHEMBL1206766	C[C@]1(COC(=O)Cc2ccc(O)c(O)c2)[C@@H](N3C(\C(=C/C(=O)O)\C3=O)S1(=O)=O)C(=O)O	455.052	-0.997	-8.3	9	31	3	6	4	9
CHEMBL3606098	O[C@H]1C[C@@H](O[C@@H]1COP(=O)(O)C(F)(F)P(=O)(O)O)N2C=C(F)C(=O)NC2=O	440	-0.746	-8.3	13	27	2	6	5	8
ZINC000219968783	COCc1nc(NCCc2nc(N)cc(O)n2)cc(C2CC(N)C2)n1	345.191	0.56	-8.2	9	25	3	7	4	9
CHEMBL2064326	CCOC1=C(Nc2ccc(O[C@H]3O[C@H](CO)[C@@H](O)[C@H](O)[C@@H]3O)c(Cl)c2)C(=O)C1=O	429.083	-0.743	-8.2	10	29	3	7	5	10
CHEMBL3230007	CC(=O)C1=C(O)\C(=C(/O)\Nc2cccc(NC(=O)C(=O)O)c2)\C(=O)OC1=O	376.054	0.376	-8.2	9	27	2	4	5	9
CHEMBL3236421	NC1=NC(=O)N(C=C1)[C@@H]2O[C@H](COP(=O)(O)NC(=O)c3ccccc3)[C@@H](O)C2(F)F	446.08	0.266	-8.2	11	30	3	6	4	9
CHEMBL223215	NS(=O)(=O)c1ccc(cc1)n2cc(COC3OC[C@@H](O)[C@@H](O)[C@@H]3O)nn2	386.09	-2.13	-8.2	9	26	3	5	4	10
CHEMBL2112867	CNc1nc(C)nc2c1ncn2[C@H]3C[C@H](OP(=O)(O)O)[C@]4(COP(=O)(O)O)C[C@H]34	449.087	0.715	-8.2	9	29	4	7	5	9
CHEMBL3642930	CC(Cc1occ(c1)C(=O)Oc2ccc(cc2)C(=N)N)C(=O)N[C@@H](CS(=O)(=O)O)C(=O)O	467.1	0.419	-8.2	9	32	2	10	5	8
CHEMBL1982106	CC(=O)NNc1nc(C)c(s1)C(=O)NNC(=O)C(=O)Nc2cccc(c2)C(=O)C	418.106	0.517	-8.2	13	29	2	5	5	8
CHEMBL3248251	CC(=O)C1=C(O)\C(=C(/C)\Nc2cccc(NC(=O)C(=O)C(=O)O)c2)\C(=O)OC1=O	402.07	0.449	-8.2	9	29	2	6	4	9
CHEMBL1962731	NC(=N)NC(=O)c1nc(Cl)c(NCCS(=O)(=O)Cc2ccccc2)nc1N	411.088	0.362	-8.2	9	27	2	7	5	8
CHEMBL331527	NCC(=O)NCC(=O)Nc1ccc(cc1)S(=O)(=O)Nc2nnc(s2)S(=O)(=O)N	449.025	-2	-8.1	13	28	2	8	5	10
CHEMBL259682	NS(=O)(=O)c1ccc(cc1)c2cn(nn2)[C@H]3O[C@H](CO)[C@@H](O)[C@H](O)[C@@H]3O	386.09	-2.435	-8.1	9	26	3	4	5	10
CHEMBL2112868	CNc1nc(F)nc2c1ncn2[C@H]3C[C@H](OP(=O)(O)O)[C@]4(COP(=O)(O)O)C[C@H]34	453.061	0.545	-8.1	12	29	4	7	5	9
CHEMBL3230005	CC(=O)C1=C(O)\C(=C(/O)\Nc2ccc(NS(=O)(=O)N)cc2)\C(=O)OC1=O	383.042	-0.032	-8.1	11	26	2	5	5	9
ZINC000008762000	COC(=O)c1cc(NC(=O)c2ccccc2)c(=O)oc1/C=C/c1c(O)[nH]c(=O)[nH]c1=O	425.086	0.931	-8.1	9	31	3	5	4	8
ZINC000085879442	COc1cc(/C=C/C(=O)c2nc3ccccc3[nH]2)ccc1O[C@@H]1O[C@H](CO)[C@H](O)[C@H](O)[C@H]1O	456.153	0.646	-8.1	11	33	4	7	5	9
ZINC000009882564	Nc1nc(N)nc(SCC(=O)NC(=O)N[C@@H]2CCS(=O)(=O)C2)n1	361.063	-1.859	-8.1	13	23	2	4	4	10
CHEMBL525202	Cc1nc(NCc2ccccc2)sc1C[C@@H]3O[C@H](CO)[C@H](O)[C@H](O)[C@H]3O	380.141	0.449	-8.1	11	26	3	6	5	8
CHEMBL3339255	OC[C@H]1O[C@@H](Oc2ccc(cc2)C(=O)N\N=C\c3cccc(c3)C#N)[C@H](O)[C@@H](O)[C@@H]1O	427.138	-0.499	-8.1	9	31	3	6	5	9
ZINC000005350690	CC(C)(Oc1ccc(Cl)cc1)C(=O)O[C@@H]1O[C@H](C(=O)O)[C@@H](O)[C@H](O)[C@H]1O	390.072	-0.067	-8.1	9	26	2	5	4	8
CHEMBL3221802	O[C@@H]1C[C@@](O)(C=C([C@H]1O)c2cn(nn2)c3ccccc3O)C(=O)O	333.096	-0.703	-8.1	9	24	3	3	5	8
ZINC000101152015	C/C(NCCNC(=O)c1nnc(N)[nH]1)=C1/C(=O)NC(=O)SC1=O	339.075	-1.51	-8.1	17	23	2	5	5	9
ZINC000020636266	COC(=O)c1cc(NC(=O)C[C@@H]2SC(NC(=N)N)=NC2=O)cc(C(=O)OC)c1	407.09	0.069	-8	8	28	2	5	4	8
CHEMBL3526659	COc1cc(\C=C\C(=O)O[C@@H]2C[C@@](O)(C[C@@H](O)[C@H]2O)C(=O)O)ccc1O	368.111	-0.343	-8	10	26	2	5	5	8
CHEMBL515290	CC(C)C(=O)O[C@H]1C=C2[C@@H](NC(=O)c3c(O)c4OCOc4cc23)[C@H](O)[C@@H]1O	377.111	-0.08	-8	4	27	4	2	4	8
CHEMBL3144476	Nc1ncnc2c1ncn2[C@H]3C[C@H](OP(=S)(O)O)[C@@H](COP(=S)(O)O)O3	442.989	-0.484	-8	9	26	3	6	5	10
CHEMBL3229999	CC(=O)C1=C(O)\C(=C(/O)\Nc2cccc(OCC(=O)O)c2)\C(=O)OC1=O	363.059	0.816	-8	13	26	2	6	4	9
CHEMBL556107	OC[C@H]1O[C@@H](S\C(=N/O)\c2ccc3ccccc3c2)[C@H](O)[C@@H](O)[C@@H]1O	365.093	0.509	-8	9	25	3	3	5	8
CHEMBL1205313	CC(C)(O\N=C(\C(=O)N[C@H]1CN(C1=O)S(=O)(=O)O)/c2csc(N)n2)C(=O)O	421.036	-1.561	-8	10	27	2	7	4	10
ZINC000102819320	CN(C[C@@H](O)[C@@H](O)[C@H](O)[C@@H](O)CO)C(=O)COc1ccc2c(c1)oc(=O)c1ccccc21	447.153	-0.781	-8	9	32	3	9	5	9
ZINC000008651709	COC(=O)[C@@H]1O[C@@H](Sc2ncnc3[nH]cnc32)[C@@H](O)[C@@H](O)[C@H]1O	342.063	-1.574	-8	10	23	3	3	4	10
CHEMBL319348	C\C(=C\c1ccc(OCC=C)c(NS(=O)(=O)C)c1)\C(=O)N[C@@H]2[C@H](O)[C@@H](O)[C@H]3OCO[C@H]3[C@@H]2O	484.152	-0.651	-8	9	33	3	8	5	9
CHEMBL1207388	O[C@H]1[C@H](O)[C@H]2[C@@H](NC(=O)c3c(O)c4OCOc4cc23)[C@@H]5OP(=O)(O)O[C@H]15	387.036	-1.064	-8	10	26	5	0	5	9
ZINC000108248228	C/C(NCCNC(=O)c1nnc(N)[nH]1)=C1/C(=O)C=C(C)OC1=O	320.123	-0.99	-8	10	23	2	5	4	8
CHEMBL477284	OC(=O)CNC(=O)CNC(=O)CNC(=O)c1cc(cc(c1)[N+](=O)[O-])[N+](=O)[O-]	383.071	-1.45	-8	9	27	1	9	4	8
CHEMBL2348400	OC[C@H]1O[C@@H](Oc2cccc3OC(=O)Nc23)[C@H](O)[C@@H](O)[C@@H]1O	313.08	-1.7	-8	10	22	3	3	5	8
CHEMBL1933484	OC[C@H]1O[C@@H](Cc2cn(Cc3ccccc3Cl)nn2)[C@H](O)[C@@H](O)[C@@H]1O	369.109	-0.635	-8	9	25	3	5	4	8
ZINC000095461270	COC(=O)c1sccc1NC(=O)C(=O)NCCCc1n[nH]c(N)c1C#N	376.095	0.399	-8	9	26	2	6	4	8
CHEMBL2152456	C[C@@H]1[C@H]2C[C@H](O[C@@H]3O[C@H](CO)[C@@H](O)[C@H](O)[C@H]3O)[C@@](C)(O)[C@H]2COC1=O	362.158	-2.248	-7.9	9	25	3	3	5	9
CHEMBL3237971	OC[C@H]1O[C@H]([C@H](O)[C@@H](O)[C@@H]1O)c2nc(n[nH]2)c3ccc(cc3)[N+](=O)[O-]	352.102	-1.105	-7.9	10	25	3	4	5	9
CHEMBL3229960	CC(=O)C1=C(O)\C(=C(/O)\Nc2ccc(N)c(O)c2)\C(=O)OC1=O	320.064	0.64	-7.9	10	23	2	3	5	9
CHEMBL490844	COc1cc(cc(OC)c1OC)C(=O)N[C@H](CCC(=O)O)C(=O)NNC(=O)c2nccs2	466.116	0.593	-7.9	9	32	2	10	4	9
ZINC000077304050	O[C@@]1(CNCc2n[nH]c(-c3cnccn3)n2)CNCCOC1	305.16	-1.298	-7.9	9	22	3	5	4	8
CHEMBL1742458	CN1C(=NS(=O)(=O)N=C1NCCSCc2csc(N=C(N)N)n2)N	391.067	-1.268	-7.9	9	24	2	6	4	9
CHEMBL178393	CC1=C(SC2CCCCC2)N(COCNC(=O)CNCP(=O)(O)O)C(=O)NC1=O	450.134	0.042	-7.9	12	29	2	10	5	8
CHEMBL2028483	[Na+].OC(C(O)C(O)c1nc2ccccc2s1)C(O)C(=O)[O-]	321.028	-4.834	-7.9	9	21	2	5	4	8
CHEMBL3209186	CC(Nc1nnc(O)nc1O)C(=O)N\N=C\c2cccs2	308.069	0.295	-7.9	10	21	2	5	4	9
CHEMBL3763810	COc1ccc2cc(ccc2c1)C3=NO[C@@]4(C3)O[C@H](CO)[C@@H](O)[C@H](O)[C@H]4O	375.132	0.143	-7.9	9	27	4	3	4	8
CHEMBL1778418	COc1cc(\C=C\C(=O)O[C@@H]2O[C@H](CO)[C@@H](O)[C@H](O)[C@H]2O)ccc1O	356.111	-1.243	-7.8	9	25	2	5	5	9
ZINC000008825936	CNC(=O)NC(=O)[C@@H](C)OC(=O)c1cccnc1S[C@@H](C)C(=O)NC(=O)NC	411.121	0.019	-7.8	9	28	1	6	4	8
ZINC000252479561	Nc1cc(N)nc(SCC(=O)NCc2ccc(S(N)(=O)=O)cc2)n1	368.073	-0.303	-7.8	10	24	2	6	4	8
CHEMBL3622511	CN(C)C1=NC(=C(C(=O)N1)c2nc3ccccc3s2)N[C@@H]4C[C@H](CO)[C@@H](O)[C@H]4O	417.147	0.627	-7.8	9	29	4	5	5	9
CHEMBL284868	CC1OC(OC2CCCCC2OCCCCC(C(=O)O)C(=O)O)C(O)C(O)C1O	420.2	0.114	-7.8	12	29	2	10	5	8
ZINC000005349429	C[C@H](NC(=O)CSc1ncnc2[nH]cnc21)C(=O)N[C@@H](CCC(=O)O)C(N)=O	409.117	-1.215	-7.8	9	28	2	10	5	8
CHEMBL1085771	CSc1ccc(Cc2cc(ccc2Cl)[C@@H]3O[C@H](CO)[C@@H](O)[C@H](O)[C@H]3O)nn1	412.086	0.958	-7.8	9	27	3	5	4	8
CHEMBL582936	OP(=O)(O)OP(=O)(O)OP(=O)(O)CCCN1C=CC(=O)NC1=O	393.973	-0.662	-7.8	10	23	1	8	5	8
ZINC000002818155	CC(C)(CO)NS(=O)(=O)c1ccc2c(c1)C(=NO)c1cc(S(=O)(=O)NC(C)(C)CO)ccc1-2	497.129	0.992	-7.8	9	33	3	8	5	8
CHEMBL1093021	OC[C@H]1O[C@H]([C@H](O)[C@@H](O)[C@H]1O)n2cc(CCc3ccccc3)nn2	335.148	-0.964	-7.8	9	24	3	5	4	8
CHEMBL3248252	CC(=O)C1=C(O)\C(=C(/C)\Nc2cccc(NC(=O)C(O)CO)c2)\C(=O)OC1=O	390.106	0.149	-7.8	9	28	2	6	5	9
CHEMBL3544799	CC1(CCOC2O[C@@H]([C@@H](O)[C@H](O)[C@H]2O)C(=O)O)CC(=O)NC1=O	333.106	-2.662	-7.8	9	23	2	5	5	8
ZINC000827847787	Cc1nc(C)c(CC(=O)NCCc2nc(N)cc(O)n2)c(O)n1	318.144	-0.222	-7.8	10	23	2	5	4	8
CHEMBL175051	C[C@@H](O)[C@@H]1[C@H]2[C@@H](C)C(=C(N2C1=O)C(=O)O)S[C@@H]3CN[C@@H](C3)c4cc(CO)on4	409.131	0.457	-7.8	9	28	4	6	4	8
CHEMBL215381	O[C@H]1[C@@H](O)[C@@H](O[C@@H]1COP(=O)(O)O)N2C=CC(=O)N(CC(=O)c3ccccc3)C2=O	442.078	-1.379	-7.7	9	30	3	7	4	10
CHEMBL514144	CO[C@]1(NC(=O)[C@]2(OC(=C(C)C2=O)[C@@H](O)[C@@H](O)\C=C\C(=O)C)[C@H]1O)C(=O)c3ccccc3	445.137	-0.818	-7.7	9	32	3	7	4	9
ZINC000001703325	Cc1cn([C@H]2O[C@@H]([C@H](O)C(N)=O)[C@@H](O)[C@@H]2O)c(=O)[nH]c1=O	301.091	-3.69	-7.7	9	21	2	3	5	8
CHEMBL145474	Nc1ncnc2c1ncn2\C=C\3/CC3COP(=O)(O)P(=O)(O)P(=O)(O)O	425.006	0.749	-7.7	12	26	3	6	5	9
ZINC000009512131	CCNC(=O)NC(=O)[C@H](C)OC(=O)CNS(=O)(=O)c1ccc(NC)c([N+](=O)[O-])c1	431.111	-0.308	-7.7	11	29	1	9	4	9
ZINC000008826441	C=CCNC(=O)NC(=O)COC(=O)c1cc([N+](=O)[O-])ccc1NCCO	366.118	0.168	-7.7	9	26	1	9	4	8
ZINC001772492702	C[C@@H](O)[C@@H](O)O[C@H](COC(=O)[C@@H]1CCCN1C(=O)OCc1ccccc1)[C@@H](O)CO	427.184	-0.232	-7.6	9	30	2	10	4	9
CHEMBL2420978	NC1=Nc2c(ncn2[C@H]3CN(C[C@H]3O)C(=O)CP(=O)(O)O)C(=O)N1	358.079	-2.376	-7.6	9	24	3	3	5	8
ZINC000110424093	O=S(=O)(O)O/N=C(\Cc1ccccc1)S[C@@H]1O[C@H](CO)[C@H](O)[C@@H](O)[C@H]1O	409.05	-1.105	-7.6	11	26	2	6	5	10
ZINC000016970127	NC(=O)NC(=O)/C=C/C(=O)OCCOC(=O)/C=C/C(=O)NC(N)=O	342.081	-2.425	-7.6	13	24	0	7	4	8
ZINC000004403202	O=C(OC[C@@H](O)[C@@H](O)[C@H](O)[C@H](O)COC(=O)c1ccccc1)c1ccccc1	390.131	0.144	-7.6	10	28	2	9	4	8
CHEMBL1091856	OC(CCCCOc1nonc1S(=O)(=O)c2ccccc2)(P(=O)(O)O)P(=O)(O)O	472.011	0.453	-7.6	17	29	2	10	5	9
CHEMBL191119	CCc1cc(C(=O)C)c(O)cc1OCc2cccc(n2)C(=O)NC(CO)(CO)CO	418.174	0.577	-7.6	10	30	2	10	5	8
ZINC000584578739	C[C@@H]1CN([C@@H]2C[C@@H](O)[C@H](CO[P@](=O)(O)OP(=O)(O)O)O2)C(=O)NC1=O	404.039	-1.124	-7.5	11	25	2	6	5	8
CHEMBL2023964	C[C@@]1(O)[C@H](O)[C@@H](CO)O[C@H]1n2cc(F)c3c(N)ncnc23	298.108	-0.846	-7.5	7	21	3	2	4	8
ZINC000223652489	Nc1nnc(CCC(=O)N[C@@H]2COCC[C@@H]2OCC(=O)O)c(=O)[nH]1	341.134	-1.945	-7.5	9	24	2	7	4	8
ZINC000004792025	O=C1c2ccc(S(=O)(=O)O)c(O)c2C(=O)c2ccc(S(=O)(=O)O)c(O)c21	399.956	0.367	-7.5	9	26	3	2	4	8
CHEMBL2371663	CC(C)(C)OC(=O)N1CCC[C@H]1C(=O)N[C@@H](CCC\N=C(/N)\N[N+](=O)[O-])C(=O)NCC(=O)N	472.239	-1.652	-7.5	9	33	1	10	5	8
CHEMBL1852234	CC(=O)c1c(C)onc1c2nc(c[nH]2)[C@@H](O)[C@H](O)[C@H](O)CO	311.112	-0.677	-7.5	10	22	2	6	5	8
CHEMBL3805838	COC(=O)C[C@H](NC(=O)CNc1nc(NC(=O)C)nc2[nH]cnc12)C(=O)OC	393.14	-1.056	-7.5	9	28	2	8	4	10

## Sheet: Thymidine Kinase
ID	SMILES	MW	logP	Affinity	Number of bonds	numAtoms	numRings	numRotBonds	numHDon	numHAcc
CHEMBL3674540	NC(=O)NNC(=N)c1cnc2nnn(Cc3ccc4ncccc4c3)c2n1	362.135	0.316	-9.5	11	27	4	3	4	8
ZINC000004900921	CO[C@H]1O[C@@H](CO)[C@@H](O)[C@@H](NC(=O)CNC(=O)OCc2ccccc2)[C@@H]1O	384.153	-1.517	-9	9	27	2	7	5	8
CHEMBL3596443	C[C@H](NC(=O)OCc1ccccc1)C(=O)N[C@@H](COC(=O)CNC(=O)OC(C)(C)C)C(=O)O	467.19	0.939	-8.9	10	33	1	10	4	8
CHEMBL3195633	Oc1ccc2ccccc2c1\C=N\NC(=O)Cc3nnc(O)nc3O	339.097	0.834	-8.7	9	25	3	4	4	8
CHEMBL3946508	NS(=O)(=O)OC[C@H]1C[C@@H](Nc2ncnc3[nH]c(nc23)c4ccccc4)[C@H](O)[C@@H]1O	420.122	-0.238	-8.7	10	29	4	6	5	9
ZINC000041121518	CNC(=O)c1nn(C)cc1Nc1ncnc2c1NC(=O)CN2	302.124	-0.323	-8.6	9	22	3	3	4	8
CHEMBL1683320	O[C@@H]1[C@@H](COP(=O)(O)O)O[C@H]([C@@H]1O)n2cc(nn2)c3ccc(F)cc3	375.063	-0.187	-8.6	15	25	3	5	4	8
ZINC000101268500	N=C(N)NS(=O)(=O)c1ccc(NC=C2C(=O)OC3(CCCCC3)OC2=O)cc1	408.11	0.915	-8.6	11	28	3	4	4	8
ZINC000002750362	O=C(Nc1nnn[nH]1)c1ccccc1C(=O)Nc1nnn[nH]1	300.083	-0.783	-8.5	10	22	3	4	4	8
CHEMBL3230007	CC(=O)C1=C(O)\C(=C(/O)\Nc2cccc(NC(=O)C(=O)O)c2)\C(=O)OC1=O	376.054	0.376	-8.5	12	27	2	4	5	9
CHEMBL254584	CCCCCC(=O)N[C@@H]1[C@@H](O)[C@H](O)[C@@H](CO)O/C/1=N\OC(=O)Nc2ccccc2	409.185	0.727	-8.4	9	29	2	8	5	8
CHEMBL2369013	NC1=NC(=O)N(C=C1)[C@@H]2O[C@H](COP(=O)(O)OP(=O)(O)O)[C@@H](O)C2=C	399.023	-1.134	-8.4	11	25	2	6	5	10
CHEMBL1207655	NC(=O)c1cc(NC(=O)c2nnn[nH]2)cc(NC(=O)c3nnn[nH]3)c1	343.089	-1.684	-8.4	12	25	3	5	5	9
CHEMBL3914312	NS(=O)(=O)NCCNc1nonc1\C(=N\O)\NCc2occ(Br)c2	422.996	-0.444	-8.4	13	24	2	8	5	9
ZINC000140021647	CN1C(=O)NC(=O)[C@](O)([C@@]2(O)C(=O)NC(=O)N(C)C2=O)C1=O	314.05	-4.135	-8.4	14	22	2	1	4	8
CHEMBL3221801	O[C@@H]1C[C@@](O)(C=C([C@H]1O)c2cn(nn2)c3cccc(c3)C(=O)O)C(=O)O	361.091	-0.71	-8.4	9	26	3	4	5	8
CHEMBL1206766	C[C@]1(COC(=O)Cc2ccc(O)c(O)c2)[C@@H](N3C(\C(=C/C(=O)O)\C3=O)S1(=O)=O)C(=O)O	455.052	-0.997	-8.4	13	31	3	6	4	9
ZINC000017125198	COC(=O)[C@@H](CCC/N=C(\N)N[N+](=O)[O-])NC(=O)c1ccc2c(c1O)C(=O)c1ccccc1C2=O	483.139	0.315	-8.4	9	35	3	8	4	9
ZINC000821439073	CC(C)Cc1cc(C(=O)NCCc2nc(N)cc(O)n2)nc(O)n1	332.16	0.431	-8.4	9	24	2	6	4	8
ZINC000426435386	Cc1cc(O)nc(NCCNC(=O)NCc2noc(C(C)C)n2)n1	335.171	0.908	-8.3	10	24	2	7	4	8
CHEMBL391279	CNC(=O)[C@]12CN[C@H]([C@@H]1O)[C@@H](O2)n3cnc4c(N)ncnc34	305.124	-2.245	-8.3	16	22	4	2	4	9
CHEMBL3925381	NS(=O)(=O)NCCCNc1nonc1\C(=N\O)\Nc2cccc(c2)C(F)(F)F	423.094	0.931	-8.3	10	28	2	8	5	8
CHEMBL1098400	CNC(=O)[C@H]1O[C@H]([C@H](O)[C@@H]1O)n2cnc3c(NCC4CC(C)(C)N([O])C4(C)C)ncnc23	448.231	-0.172	-8.3	9	32	4	5	4	10
CHEMBL3950973	O=C1NC(=O)\C(=C\c2cnn3c(NC4CC4)nc(NC5CCS(=O)(=O)C5)nc23)\N1	418.117	-0.522	-8.3	10	29	5	5	4	10
CHEMBL1957445	O[C@H]1[C@@H](O)[C@@H](O[C@@H]1CCP(=O)(O)O)N2C=C(C(=O)NC2=O)c3cc4ccccc4s3	454.06	0.605	-8.3	15	30	4	5	5	8
CHEMBL3590472	Cn1cc(NC(=O)c2cnn3ccc(N[C@H]4CCCC[C@@H]4N)nc23)c(n1)C(=O)N	397.197	0.496	-8.2	9	29	4	5	4	9
ZINC000827847787	Cc1nc(C)c(CC(=O)NCCc2nc(N)cc(O)n2)c(O)n1	318.144	-0.222	-8.2	9	23	2	5	4	8
ZINC000408632186	COc1cc(OC)cc(-c2nc(S/C(=C/C3C(=O)NC(=O)NC3=O)C(=O)O)n[nH]2)c1	433.069	0.532	-8.2	12	30	3	7	4	9
CHEMBL1888199	NC(=O)c1ncn(n1)[C@@H]2O[C@H](CNC3=NS(=O)(=O)c4ccccc34)[C@@H](O)[C@H]2O	408.085	-2.265	-8.2	10	28	4	4	4	10
ZINC000031750813	n1n[nH]c(C2=NN=C(c3nnn[nH]3)NN2)n1	220.068	-3.071	-8.2	14	16	3	2	4	10
CHEMBL3287018	CC(C)[C@H](NC(=O)c1csc(n1)c2csc(C)n2)C(=O)NCC(=O)NO	397.088	0.951	-8.2	11	26	2	7	4	8
CHEMBL3910424	Nc1ccc(cc1)S(=O)(=O)Nc2ccc(cc2)S(=O)(=O)Nc3nnc(s3)S(=O)(=O)N	489.986	0.369	-8.2	12	30	3	7	4	10
CHEMBL607774	CCCCCOC(=O)NC1=NC(=O)N(C=C1F)C2O[C@@H]([C@@H](O)[C@H]2O)C(=O)O	389.123	-0.175	-8.2	9	27	2	7	4	9
CHEMBL3249382	NC(=O)COC1=CN([C@@H]2O[C@H](CO)[C@@H](O)[C@H]2O)C(=O)NC1=O	317.086	-3.988	-8.1	13	22	2	5	5	9
CHEMBL609642	CNC(=O)[C@H]1OC([C@H](O)[C@@H]1O)n2cnc3c(NCc4ccc(Br)cc4)ncnc23	462.065	0.566	-8.1	10	29	4	5	4	9
ZINC000008651709	COC(=O)[C@@H]1O[C@@H](Sc2ncnc3[nH]cnc32)[C@@H](O)[C@@H](O)[C@H]1O	342.063	-1.574	-8.1	14	23	3	3	4	10
CHEMBL2357611	COc1ccc(Cl)cc1c2noc(n2)[C@@H]3O[C@H](CO)[C@H](O)[C@H](O)[C@H]3O	372.072	-0.087	-8.1	10	25	3	4	4	9
CHEMBL1207111	O=C(Nc1cc(NC(=O)c2nnn[nH]2)cc(c1)C#N)c3nnn[nH]3	325.078	-0.911	-8.1	12	24	3	4	4	9
CHEMBL2007947	OC1C(O)C(CP(=O)(O)O)OC1COP(=O)(O)Oc2ccc(cc2)[N+](=O)[O-]	429.023	-0.243	-8.1	14	27	2	8	5	9
CHEMBL4078273	CCCCCCc1ccc(O[C@@H]2O[C@H](COS(=O)(=O)O)[C@@H](O)[C@H](O)[C@H]2O)cc1	420.145	0.815	-8.1	12	28	2	10	4	8
CHEMBL1962613	COC(=O)CNc1nc(N)c(nc1Cl)C(=O)NC(=N)N	301.069	-1.08	-8.1	11	20	1	4	5	8
CHEMBL3092404	OC[C@H]1O[C@H](CC(=O)Nc2nc3ccccc3s2)[C@@H](O)[C@@H](O)[C@@H]1O	354.089	-0.533	-8	11	24	3	4	5	8
ZINC000014586321	O=C(OC[C@H](O)[C@H](O)[C@@H](O)[C@@H](O)COC(=O)c1ccccc1)c1ccccc1	390.131	0.144	-8	13	28	2	9	4	8
ZINC000252383336	O=C(O)CN1C(=O)N[C@@H]2O[C@H]([C@@H]3O[C@@H]4NC(=O)N(CC(=O)O)[C@H]4O3)O[C@@H]21	374.071	-2.744	-8	13	26	4	5	4	8
ZINC000031291573	Cc1cc(CC(=O)O[C@@H]2O[C@H](C(=O)O)[C@@H](O)[C@H](O)[C@H]2O)n(C)c1C(=O)c1ccc(Cl)cc1	467.098	0.196	-8	9	32	3	6	4	9
ZINC000101152015	C/C(NCCNC(=O)c1nnc(N)[nH]1)=C1/C(=O)NC(=O)SC1=O	339.075	-1.51	-8	9	23	2	5	5	9
CHEMBL331386	NCC(=O)NCCC(=O)Nc1nnc(s1)S(=O)(=O)N	308.036	-2.411	-8	11	19	1	6	4	8
CHEMBL607601	NC(=S)c1ncn(n1)C2O[C@H](COS(=O)(=O)N)[C@@H](O)[C@H]2O	339.031	-3.248	-7.9	13	21	2	5	4	10
CHEMBL1192732	Cn1cc(NC(=O)c2cc(NC(=O)Cn3ccnc3[N+](=O)[O-])cn2C)cc1C(=O)NCCC(=N)N	484.193	0.415	-7.9	9	35	3	10	5	10
ZINC000004824165	CS(=O)(=O)NC[C@H]1O[C@@H](n2cnc3c2ncnc3N)[C@@H](O)[C@@H]1O	344.09	-2.423	-7.9	10	23	3	4	4	10
CHEMBL1683328	CC(=O)NCc1cn(nn1)[C@@H]2O[C@H](COP(=O)(O)O)[C@@H](O)[C@H]2O	352.078	-2.357	-7.9	11	23	2	6	5	9
CHEMBL438530	OC[C@@H](O)[C@@H](O)[C@H](OC(=O)c1nn(Cc2cc(Cl)cc(Cl)c2)c3ccccc13)[C@H](O)CO	484.08	0.984	-7.9	13	32	3	9	5	9
ZINC000104335026	NC(=O)NC(=O)/C=C/C(=O)OCCOC(=O)/C=C\C(=O)NC(N)=O	342.081	-2.425	-7.9	15	24	0	7	4	8
ZINC000012687369	Nc1cc(=O)[nH]c(SCC(=O)NC(=O)N[C@@H]2CCS(=O)(=O)C2)n1	361.051	-1.543	-7.9	13	23	2	4	4	8
CHEMBL1871055	OC[C@H]1O[C@H]([C@H](O)[C@@H](O)[C@H]1O)c2onc(n2)c3ccc4OCCc4c3	350.111	-0.814	-7.9	10	25	4	3	4	9
ZINC000244778749	CNc1cc([C@H]2C[C@@H](NC(=O)c3c[nH]nc3-n3cnnn3)C2)nc(N)n1	355.162	-0.525	-7.9	10	26	4	5	4	10
CHEMBL3606098	O[C@H]1C[C@@H](O[C@@H]1COP(=O)(O)C(F)(F)P(=O)(O)O)N2C=C(F)C(=O)NC2=O	440	-0.746	-7.9	11	27	2	6	5	8
CHEMBL2442701	N\C(=N\O)\c1ccc(cn1)c2cncc(n2)c3ccc(nc3)\C(=N\O)\N	350.124	0.79	-7.9	9	26	3	4	4	8
ZINC000016949218	CCOC(=O)c1ccc(N/N=C2/C(=N)NN(S(C)(=O)=O)C2=N)cc1	352.095	0.366	-7.9	9	24	2	5	4	8
CHEMBL1917481	OC[C@H]1O[C@H](Cn2cc(nn2)c3ccccc3)[C@@H](O)[C@@H](O)[C@@H]1O	321.132	-1.213	-7.9	9	23	3	4	4	8
CHEMBL3198889	OC(C(O)C(=O)N\N=C\c1occc1)C(=O)N\N=C\c2occc2	334.091	-0.805	-7.9	8	24	2	7	4	8
ZINC000252427595	O=C(O[C@H]1[C@H](O)[C@H](O)[C@@H](OC(=O)c2cccnc2)[C@H](O)[C@@H]1O)c1cccnc1	390.106	-1.315	-7.8	8	28	3	4	4	10
ZINC000035112854	O=C1NC=N[C@@H]2[C@H]1N=CN2[C@H]1O[C@@H](COP(=O)(O)O)[C@@H](O)[C@H]1O	350.063	-3.261	-7.8	9	23	3	4	5	9
CHEMBL1091856	OC(CCCCOc1nonc1S(=O)(=O)c2ccccc2)(P(=O)(O)O)P(=O)(O)O	472.011	0.453	-7.8	14	29	2	10	5	9
CHEMBL254205	O[C@H]1C[C@@H](O[C@@H]1OP(=O)(O)O)N2C=C(C=O)C(=O)NC2=O	322.02	-1.936	-7.8	10	21	2	4	4	8
ZINC000036532673	CC(=O)N[C@H]1[C@H](O)[C@H](O)[C@@H](CO)O[C@H]1Oc1ccc2c(C)cc(=O)oc2c1	379.127	-0.576	-7.8	9	27	3	4	4	8
ZINC000012320972	O=[N+]([O-])c1cc(N[C@H]2OC[C@@H](O)[C@H](O)[C@H]2O)ccc1S(=O)(=O)O	350.042	-1.308	-7.8	10	23	2	4	5	9
CHEMBL1933484	OC[C@H]1O[C@@H](Cc2cn(Cc3ccccc3Cl)nn2)[C@H](O)[C@@H](O)[C@@H]1O	369.109	-0.635	-7.8	9	25	3	5	4	8
CHEMBL549701	OC[C@H]1O[C@H]([C@H](O)[C@@H](O)[C@@H]1O)c2onc(n2)c3ccccc3	308.101	-0.749	-7.8	9	22	3	3	4	8
CHEMBL477284	OC(=O)CNC(=O)CNC(=O)CNC(=O)c1cc(cc(c1)[N+](=O)[O-])[N+](=O)[O-]	383.071	-1.45	-7.8	12	27	1	9	4	8
ZINC000016682972	CCOC(=O)[C@@H](O)[C@H](O)[C@H](O)[C@@H](O)c1nnc2ccccc2n1	323.112	-1.296	-7.8	10	23	2	6	4	9
CHEMBL3229422	Br.NCc1cc(C(=O)N)n(n1)[C@@H]2O[C@H](CO)[C@@H](O)[C@H]2O	352.038	-2.37	-7.7	10	20	2	4	5	8
ZINC000008652531	CC(=O)Nc1ccc(S(=O)(=O)Nc2c(N)nc(S)nc2O)cc1	355.041	0.812	-7.7	9	23	2	4	5	8
ZINC000019318821	O=[N+]([O-])C(=C1N[C@H](O)[C@@H](O)N1)[N+](=O)[O-]	206.029	-2.504	-7.7	10	14	1	2	4	8
CHEMBL3287015	CC(C)[C@H](NC(=O)c1csc(n1)c2cscn2)C(=O)NCC(=O)NO	383.072	0.643	-7.7	14	25	2	7	4	8
CHEMBL596924	COC(=O)[C@@]1(O)C[C@@H](O)[C@H](O)[C@@H](C1)OC(=O)\C=C\c2ccc(O)c(O)c2	368.111	-0.558	-7.7	14	26	2	4	5	9
CHEMBL2398604	OC[C@H]1O[C@H](Nc2ncc(s2)C(=O)c3ccc(cc3)C#N)[C@@H](O)[C@@H](O)[C@@H]1O	391.084	-0.542	-7.7	9	27	3	5	5	10
CHEMBL4091182	CC(=O)Nc1ccc(O[C@@H]2O[C@H](COS(=O)(=O)O)[C@@H](O)[C@H](O)[C@H]2O)cc1	393.073	-1.349	-7.7	9	26	2	6	5	9
CHEMBL3642930	CC(Cc1occ(c1)C(=O)Oc2ccc(cc2)C(=N)N)C(=O)N[C@@H](CS(=O)(=O)O)C(=O)O	467.1	0.419	-7.7	10	32	2	10	5	8
CHEMBL1742458	CN1C(=NS(=O)(=O)N=C1NCCSCc2csc(N=C(N)N)n2)N	391.067	-1.268	-7.7	11	24	2	6	4	9
CHEMBL3606035	O[C@H]1[C@@H](O)[C@@H](O[C@@H]1COP(=O)(O)CS(=O)(=O)O)N2C=CC(=O)NC2=O	402.013	-2.797	-7.7	9	25	2	6	5	10
CHEMBL3642922	CC(Cc1oc(cc1)C(=O)Oc2ccc(cc2)C(=N)N)C(=O)N[C@@H](CS(=O)(=O)O)C(=O)O	467.1	0.419	-7.7	13	32	2	10	5	8
ZINC000077285383	NC(=O)OC[C@@H](O[C@@H]1O[C@H](C(=O)O)[C@@H](O)[C@H](O)[C@H]1O)c1ccccc1Cl	391.067	-0.615	-7.7	10	26	2	6	5	8
CHEMBL1741544	Oc1ncc(CS(=O)(=O)Cc2cnc(O)nc2O)c(O)n1	314.032	-0.796	-7.7	10	21	2	4	4	10
CHEMBL3621280	ONC(=O)CNC(=O)Cn1cnc2c(NCc3ccccc3)ncnc12	355.139	0.06	-7.7	11	26	3	7	4	8
CHEMBL3139276	CN(C1CN=C(NC(=O)N)NC1=O)C(=O)C[C@@H](N)c2cc(CN)on2	352.161	-2.496	-7.7	11	25	2	5	5	8
ZINC000104367695	CCOC(=O)[C@@H](C(=N)C(=N)[C@@H](C(=O)O)C(=O)OCC)C(=O)O	316.091	-0.446	-7.7	12	22	0	9	4	8
ZINC000038801837	O=C1[C@@H]2[C@H]3C=C[C@H](O3)[C@H]2C(=O)N1/N=C/[C@H](O)[C@H](O)[C@H](O)[C@H](O)CO	342.106	-3.653	-7.6	10	24	3	6	5	9
ZINC000038819453	Nc1nc(O[C@@H]2O[C@H](C(=O)O)[C@@H](O)[C@H](O)[C@H]2O)ncc1F	305.066	-2.531	-7.6	9	21	2	3	5	9
CHEMBL330755	CN(CC(=O)NS(=O)(=O)c1nc2ccc(OCCO)cc2s1)C(=N)N	387.067	-0.702	-7.6	12	25	2	7	4	8
CHEMBL2008291	[O-][N+](=O)c1ccc(cc1)C(C2C(=O)NC(=O)NC2=O)C3C(=O)NC(=O)NC3=O	389.061	-1.357	-7.6	12	28	3	4	4	8
CHEMBL3542365	CC(CO[C@@H]1O[C@@H]([C@@H](O)[C@H](O)[C@H]1O)C(=O)O)[C@]2(C)SC(=NC2=O)N[C@H]3C[C@@H]4CC[C@H]3C4	458.172	-0.302	-7.6	11	31	4	6	5	9
CHEMBL3527033	CCN(CC)C(=O)[C@]1(C[C@H]1CNC(=O)O[C@@H]2O[C@@H]([C@@H](O)[C@H](O)[C@H]2O)C(=O)O)c3ccccc3	466.195	-0.569	-7.6	9	33	3	8	5	8
CHEMBL1192014	C\C(=N/NC1=NCCN1)\c2cccc(c2)\C(=N\NC3=NCCN3)\C	326.197	0.232	-7.6	9	24	3	4	4	8
CHEMBL4097510	OC[C@H]1O[C@H](OCc2onc(c2)c3ccccc3)[C@H](O)[C@@H](O)[C@@H]1O	337.116	-0.342	-7.6	9	24	3	5	4	8
CHEMBL217391	CCCC1=CC(=O)N([C@@H]2O[C@H](COP(=O)(O)O)[C@@H](O)[C@H]2O)C(=O)N1	366.083	-1.782	-7.5	12	24	2	6	5	8
ZINC000036511662	CC(C)(C)[C@@H](NC(=O)OCc1ccccc1)C(=O)OC[C@@H]1O[C@@H](O)[C@@H](O)[C@H](O)[C@@H]1O	427.184	-0.329	-7.5	11	30	2	6	5	9
ZINC000009490922	NC(=O)NC(=O)COC(=O)c1ccc(Oc2ccc(C(=O)OCC(=O)NC(N)=O)cc2)cc1	458.107	0.182	-7.5	9	33	2	8	4	9
CHEMBL3229960	CC(=O)C1=C(O)\C(=C(/O)\Nc2ccc(N)c(O)c2)\C(=O)OC1=O	320.064	0.64	-7.5	9	23	2	3	5	9
ZINC000008048267	O=C(Cc1cscn1)c1ccc(O[C@@H]2O[C@@H](CO)[C@@H](O)[C@@H](O)[C@H]2O)cc1O	397.083	-0.547	-7.5	13	27	3	6	5	10
CHEMBL3229985	CC(=O)C1=C(O)\C(=C(/O)\Nc2cccc(NS(=O)(=O)C)c2)\C(=O)OC1=O	382.047	0.724	-7.5	12	26	2	5	4	9
ZINC000002316003	O=C(O)CNc1nc(NCC(=O)O)nc(N2CCOCC2)n1	312.118	-1.299	-7.5	11	22	2	7	4	9
CHEMBL539944	OC[C@H]1O[C@H]([C@H](O)[C@@H](O)[C@@H]1O)c2nn[nH]n2	232.081	-3.285	-7.5	9	16	2	2	5	8
ZINC000005350690	CC(C)(Oc1ccc(Cl)cc1)C(=O)O[C@@H]1O[C@H](C(=O)O)[C@@H](O)[C@H](O)[C@H]1O	390.072	-0.067	-7.5	9	26	2	5	4	8
CHEMBL3142997	O[C@H]1C[C@@H](O[C@@H]1COP(=O)(O)CC(=O)O)N2C=C(C=C)C(=O)NC2=O	376.067	-0.885	-7.5	11	25	2	7	4	8
CHEMBL3642955	CC(Cc1ccc(s1)C(=O)Oc2ccc(cc2)C(=N)N)C(=O)N[C@@H](CS(=O)(=O)O)C(=O)O	483.077	0.887	-7.5	13	32	2	10	5	8
ZINC000575598468	O=C(O)[C@H]1O[C@@H](Oc2cc3oc(O)nc3cc2Cl)[C@H](O)[C@@H](O)[C@@H]1O	361.02	-0.542	-7.5	11	24	3	3	5	9
CHEMBL3238479	[NH3+]c1cc(cc2C=C(\C(=N\Nc3ccc(cc3F)C(=O)O)\C(=O)c12)S(=O)(=O)O)S(=O)(=O)[O-]	485	0.195	-7.5	11	32	3	5	4	9
CHEMBL1192127	Cn1cc(NC(=O)Cn2ccnc2[N+](=O)[O-])cc1C(=O)NCCC(=N)N	362.145	-0.176	-7.5	10	26	2	8	4	8
CHEMBL500420	Cc1nc(NS(=O)(=O)c2ccc(cc2)C(C)(C)C)sc1C[C@@H]3O[C@H](CO)[C@H](O)[C@H](O)[C@H]3O	486.149	0.935	-7.5	10	32	3	6	5	9
ZINC000002769138	Nc1cc(N)nc(SCC(=O)Nc2ccc(S(N)(=O)=O)cc2)n1	354.057	0.019	-7.5	9	23	2	5	4	8
ZINC000001748569	O=c1[nH]nc(SCc2ccccc2CSc2n[nH]c(=O)[nH]c2=O)c(=O)[nH]1	392.036	-0.186	-7.5	9	26	3	6	4	8
CHEMBL543722	Cl.NC(c1cc(cc2nc(O)c(O)nc12)[N+](=O)[O-])P(=O)(O)O	351.998	0.506	-7.5	11	22	2	3	5	8
CHEMBL3248251	CC(=O)C1=C(O)\C(=C(/C)\Nc2cccc(NC(=O)C(=O)C(=O)O)c2)\C(=O)OC1=O	402.07	0.449	-7.5	11	29	2	6	4	9
CHEMBL3426108	CC(=O)N[C@@H]1[C@@H](N)[C@@H](F)[C@@](F)(O[C@H]1[C@H](O)[C@H](O)CO)C(=O)OCc2cccs2	424.112	-1.26	-7.5	9	28	2	7	5	9
CHEMBL2064325	Cn1cnc2cc(cnc12)c3ccc(O[C@H]4O[C@H](CO)[C@@H](O)[C@H](O)[C@@H]4O)c(Cl)c3	421.104	0.467	-7.5	11	29	4	4	4	9
ZINC000008742081	O=C(O)c1[nH]nc(-c2n[nH]c(C(=O)O)c2[N+](=O)[O-])c1[N+](=O)[O-]	312.009	0.013	-7.5	13	22	2	5	4	8
CHEMBL41082	COC(=O)[C@H](COC(=O)c1ccc(Cl)cc1)NC(=O)[C@@H](NC(=O)[C@@H](N)CS)C(C)C	459.123	0.553	-7.5	9	30	1	10	4	8
ZINC000036369724	CN(C[C@@H](O)[C@@H](O)[C@H](O)[C@H](O)CO)C(=O)COc1ccc2c(c1)oc(=O)c1ccccc21	447.153	-0.781	-7.5	9	32	3	9	5	9

## Sheet: Dihydrofolate reductase
ID	SMILES	MW	logP	Affinity score	Number of bonds	numAtoms	numRings	numRotBonds	numHDon	numHAcc
CHEMBL1981657	N\C(=N/N=C\c1oc(cc1)c2ccc(O)c(c2)C(=O)O)\N[N+](=O)[O-]	333.071	0.78	-9	12	25	2	7	5	7
CHEMBL3248258	CC(=O)C1=C(O)\C(=C(/C)\Nc2cccc(c2)C(=O)NC3C(=O)NC(=O)NC3=O)\C(=O)OC1=O	456.092	-0.679	-8.9	9	28	3	6	5	8
ZINC000014359132	CNC(=O)NC(=O)COc1ccc(S(=O)(=O)c2ccc(OCC(=O)NC(=O)NC)cc2)cc1	478.116	0.188	-8.9	9	25	4	3	4	10
CHEMBL271952	NS(=O)(=O)c1ccc(N\N=C\2/C(=O)Nc3ccc4[nH]nnc4c23)cc1	357.064	0.374	-8.7	13	28	4	5	5	10
CHEMBL1966988	NC(=N)NS(=O)(=O)c1ccc(N\N=C/2\CCOC2=O)cc1	311.069	-0.427	-8.7	11	25	2	4	5	8
ZINC000001852448	O=P(O)(O)OC[C@@H]1O[C@H](n2cnc3c2ncnc3NCc2ccccc2)[C@@H](O)[C@H]1O	437.11	0.167	-8.7	9	21	3	2	5	8
ZINC000067676171	Cc1nc[nH]c1[C@H]1NC(=O)NC(C)=C1C(=O)NCCOc1nonc1C	361.15	0.233	-8.7	9	30	4	2	5	9
ZINC000085399072	CC(=O)Nc1nnc([C@H](O)[C@@H](O)c2cccc(N)c2)s1	294.079	0.846	-8.6	9	25	4	4	5	9
CHEMBL458055	Cc1cccc(c1)S(=O)(=O)NC(=O)NCCNCCNC(=O)NS(=O)(=O)c2cccc(C)c2	497.14	0.569	-8.6	10	33	4	7	5	10
ZINC000016188738	CN(c1ccc(C=C2C(=O)NC(=O)NC2=O)cc1)c1ccc(C=C2C(=O)NC(=O)NC2=O)cc1	459.118	0.953	-8.6	9	23	3	2	5	9
ZINC000094993255	O=c1[nH]c2ccc(S(=O)(=O)/N=c3\sccn3S(=O)(=O)c3ccc4[nH]c(=O)[nH]c4c3)cc2[nH]1	491.998	0.415	-8.6	9	24	3	2	5	10
ZINC000001673377	Nc1nc(N)nc(-c2ccccc2-c2nc(N)nc(N)n2)n1	296.125	-0.281	-8.5	10	24	3	3	5	8
ZINC000952963884	O=C(O)c1cn([C@@H]2CN[C@H](C(=O)Nc3cccc(-c4cnc[nH]4)c3)C2)nn1	367.139	0.908	-8.3	6	27	4	5	4	7
ZINC000253534769	Nc1nc2[nH]cnc2c(N[C@H]2C[C@@H](c3cc(O)ncn3)C2)n1	298.129	0.789	-8.3	10	23	2	3	4	7
CHEMBL3244641	CN(Cc1cnc2nc(N)nc(N)c2n1)c3ccc(cc3)C(=O)N[C@@H](CCC(=O)N)C(=O)N	452.203	-0.93	-8.3	9	30	5	2	4	7
CHEMBL56533	CNC(=O)CCC(NC(=O)c1ccc(cc1)N(C)Cc2cnc3nc(N)nc(N)c3n2)C(=O)O	467.203	-0.07	-8.3	10	28	2	9	4	8
CHEMBL1995214	CCc1nc(N)nc(C(=O)NCCNC(=O)c2nc(N)nc(CC)c2C)c1C	386.218	0.332	-8.3	9	27	3	4	4	7
CHEMBL2013185	NC(=NC(=O)c1nc(Cl)c(NCC(=O)OCc2ccccc2)nc1N)N	377.1	0.281	-8.3	9	32	3	6	4	10
CHEMBL404135	CC(C)C(=O)N[C@@H]1[C@@H](O)[C@H](O)[C@@H](CO)O/C/1=N\OC(=O)Nc2ccccc2	381.154	-0.198	-8.3	9	27	4	4	4	8
CHEMBL1254925	N\C(=N/O)\c1ccc(cc1)C(=O)CS(=O)(=O)c2ccc(cc2)\C(=N\O)\N	376.084	0.532	-8.3	10	26	1	7	5	8
ZINC000004824166	CS(=O)(=O)NC[C@@H]1O[C@@H](n2cnc3c2ncnc3N)[C@@H](O)[C@@H]1O	344.09	-2.423	-8.2	10	20	2	4	4	7
CHEMBL3979808	NS(=O)(=O)OC[C@H]1C[C@@H](Nc2cc(ncn2)C#Cc3ccccc3)[C@H](O)[C@@H]1O	404.115	-0.381	-8.2	9	25	3	5	4	7
CHEMBL340488	C[C@H](N)C(=O)NS(=O)(=O)OC[C@H]1O[C@H]([C@H](O)[C@@H]1O)c2nc(cs2)c3ccccc3	443.082	-0.303	-8.1	9	14	1	3	5	7
ZINC000257340135	Nc1ncnc2c1ncn2[C@H]1C[C@@H](NC(=O)/C=C/C(=O)O)[C@@H](O)[C@H]1O	348.118	-1.799	-8.1	10	27	3	5	5	7
CHEMBL1962845	CCOP(=O)(CNc1nc(N)c(nc1Cl)C(=O)NC(=N)N)OCC	379.092	0.971	-8.1	9	29	4	6	4	8
ZINC000016682862	CCOC(=O)CSc1[nH]c(NC(=S)NC(=O)c2ccccc2)c(C(N)=O)c1C(N)=O	449.083	0.994	-8	11	31	4	4	5	10
CHEMBL211600	N\C(=N/C(=O)c1nc(Cl)c(N)nc1N)\NCCCCc2cccc(OCCO)c2	421.163	0.733	-8	10	19	2	2	5	7
CHEMBL3765686	OCc1c(O)c(ncc1CS(=O)(=O)c2ccc(F)cc2)C(=O)NO	356.048	0.511	-8	9	19	2	3	5	8
ZINC000015721753	C[C@H](NC(=O)OC(C)(C)C)C(=O)N[C@@H](C)C(=O)N[C@@H](CC(=O)O)C(=O)Nc1ccc([N+](=O)[O-])cc1	495.197	0.911	-8	10	21	3	2	4	9
CHEMBL1389358	COc1cccc(c1)C(=O)NCC(=O)NNc2ncnc(N)c2[N+](=O)[O-]	361.113	-0.151	-7.9	8	27	3	6	4	8
CHEMBL4086367	CC(C)(NS(=O)(=O)C)[C@H](NC(=O)c1ccc(cc1)c2oc3ncncc3c2)C(=O)NO	447.121	0.821	-7.9	10	33	3	5	5	10
ZINC000262725181	Cc1cc(C(=O)N[C@H](C)C(=O)O)nc2nc(O)nc(O)c12	292.081	-0.053	-7.9	10	21	3	3	5	10
ZINC000001748574	O=c1[nH]nc(SCc2ccc(CSc3n[nH]c(=O)[nH]c3=O)cc2)c(=O)[nH]1	392.036	-0.186	-7.9	9	25	1	6	5	8
CHEMBL3914312	NS(=O)(=O)NCCNc1nonc1\C(=N\O)\NCc2occ(Br)c2	422.996	-0.444	-7.9	12	28	3	8	4	7
CHEMBL2442701	N\C(=N\O)\c1ccc(cn1)c2cncc(n2)c3ccc(nc3)\C(=N\O)\N	350.124	0.79	-7.9	12	23	4	3	4	9
ZINC000001683546	Nc1ccc(S(=O)(=O)NCC(O)CNS(=O)(=O)c2ccc(N)cc2)cc1	400.088	-0.531	-7.9	10	19	3	2	4	8
CHEMBL512360	OC1=C(NS(=O)(=O)c2ccccc12)C(=O)N\N=C\c3ccc(O)cc3O	375.053	0.767	-7.9	10	20	2	4	4	7
CHEMBL376259	N[C@@H]1C[C@H](N)CN(C1)c2nc(Nc3cccc(c3)C(F)(F)F)nc(n2)N4C[C@H](N)C[C@H](N)C4	466.253	0.363	-7.9	9	24	2	7	5	7
CHEMBL513176	C[C@H](NC(=O)OCc1ccccc1)C(=O)N[C@@H](C)C(=O)NN(CC(=O)N)C(=O)\C=C\c2occc2	485.191	0.458	-7.9	9	25	2	8	4	7
CHEMBL358502	CC(=O)NS(=O)(=O)O[C@@H]1[C@H](O)C[C@@H](O)C[C@H]1OCCCCc2ccccc2O	417.146	0.382	-7.9	10	21	3	3	5	10
ZINC000005672483	CCOC(=O)/C(C(=N)NN)=C1\NN=C(c2ccc(OC)cc2)O1	319.128	0.192	-7.9	11	31	3	8	4	10
CHEMBL2237804	CN1C(=O)N(C)c2nc(\N=N\c3c(N)n[nH]c3N)[nH]c2C1=O	304.114	-0.737	-7.8	8	23	2	5	5	7
CHEMBL1867897	Cc1nc(O)nc(O)c1S(=O)(=O)Nc2ccc(cc2)S(=O)(=O)N	360.02	-0.356	-7.8	11	22	1	7	5	7
ZINC000016949001	CCOC(=O)c1ccc(N/N=C2/C(=N)NN(C(C)=O)C2=N)cc1	316.128	0.952	-7.8	9	24	2	6	5	9
ZINC000096562372	CC(=O)NCC(CNc1ccc(C(=O)NCCO)cc1)([N+](=O)[O-])[N+](=O)[O-]	369.128	-0.794	-7.8	13	20	3	3	4	8
CHEMBL607621	Nc1ccc(cc1)S(=O)(=O)OC[C@H]2O[C@H](O)[C@@H](O)[C@@H]2O	305.057	-1.587	-7.8	9	19	2	3	5	7
CHEMBL110667	NC(=O)[C@H](Cc1ccccc1)NC(=O)[C@H](Cc2nc3ccccc3s2)[C@H](O)C(=O)NO	442.131	0.534	-7.8	12	22	1	8	5	7
ZINC000022067009	Cc1ccc(C(=O)c2cc(O[C@@H]3O[C@H](C(=O)O)[C@@H](O)[C@H](O)[C@H]3O)c(O)c([N+](=O)[O-])c2)cc1	449.096	0.111	-7.8	13	26	3	3	5	8
ZINC000013550850	O=[N+]([O-])c1ccc(O[C@@H]2O[C@H](COP(=O)(O)O)[C@H](O)[C@H](O)[C@H]2O)cc1	381.046	-1.11	-7.8	9	33	4	6	4	8
ZINC000004221781	CC(C)C[C@@H](NC(=O)C1=C[C@@H](NC(=O)CS(=O)(=O)c2ccccc2)[C@@H](O)[C@H](O)C1)C(N)=O	467.173	-0.987	-7.7	9	31	4	5	5	9
ZINC000828645375	CN(C[C@H](O)[C@H](O)[C@@H](O)[C@H](O)CO)c1oc(-c2ccc(Cl)cc2)nc1C#N	397.104	-0.261	-7.7	14	33	3	8	4	10
ZINC000218254352	Nc1nc(NCc2nnn[nH]2)cc(C2CC(N)C2)n1	261.145	-0.611	-7.7	12	31	3	7	5	8
CHEMBL1775075	Nc1n[nH]c(N)c1\N=N\c2ccc(cc2)S(=O)(=O)N	281.069	0.637	-7.7	9	23	3	4	4	10
CHEMBL502805	Cc1nc(NC(=O)c2ccc(Br)cc2)sc1C[C@@H]3O[C@H](CO)[C@H](O)[C@H](O)[C@H]3O	472.03	0.851	-7.7	10	27	3	5	4	7
CHEMBL1205036	NC(=N)NCCNC(=O)\C=C\C1=C(N2[C@@H](\C(=C/c3ccccn3)\C2=O)S(=O)(=O)C1)C(=O)O	460.117	-1.444	-7.7	10	23	3	3	4	9
CHEMBL1200242	N[C@H](CCC\N=C(\N)/N[N+](=O)[O-])C(=O)N1C[C@H](C[C@@H]1C(=O)N)NC(=O)C(F)(F)F	426.159	-2.677	-7.7	10	14	0	6	5	7
CHEMBL3230041	CC(=O)C1=C(O)\C(=C(/O)\Nc2ccc(NC=O)cc2)\C(=O)OC1=O	332.064	0.921	-7.7	12	20	3	2	4	10
CHEMBL3198889	OC(C(O)C(=O)N\N=C\c1occc1)C(=O)N\N=C\c2occc2	334.091	-0.805	-7.7	9	31	2	6	5	10
CHEMBL4074018	OCc1cccc(O[C@@H]2O[C@H](COS(=O)(=O)O)[C@@H](O)[C@H](O)[C@H]2O)c1	366.062	-1.815	-7.6	9	21	2	5	4	8
CHEMBL1909793	Cl.NC(=N)NC(=O)c1nc(Cl)c(NCCC#N)nc1N	318.051	0.083	-7.6	9	27	5	5	4	9
CHEMBL3229960	CC(=O)C1=C(O)\C(=C(/O)\Nc2ccc(N)c(O)c2)\C(=O)OC1=O	320.064	0.64	-7.6	12	21	1	7	5	7
ZINC000012745896	Nc1cc(=O)[nH]c(SCC(=O)c2c(N)n(C3CC3)c(=O)[nH]c2=O)n1	350.08	-0.906	-7.6	9	25	0	10	4	8
ZINC000823193756	CCNc1nc(C)c(C(=O)NCc2nc(N)n[nH]2)s1	281.106	0.514	-7.5	8	20	2	2	5	8
CHEMBL3901573	NS(=O)(=O)OC[C@H]1C[C@@H](NC(=O)c2ccccn2)[C@H](O)[C@@H]1O	331.084	-1.858	-7.5	11	20	2	4	4	7
CHEMBL394336	CC(=O)Nn1c(Cc2csc(NC(=O)CCl)n2)nnc1SCC(=O)NNC(=O)CCl	494.011	0.071	-7.5	9	28	3	6	4	8
ZINC000005227304	O=[N+]([O-])c1ccccc1O[C@@H]1O[C@H](CO)[C@H](O)[C@@H](O)[C@@H]1O	301.08	-1.227	-7.5	11	19	0	7	5	8
CHEMBL3895797	NS(=O)(=O)OC[C@H]1C[C@@H](NC(=O)c2ccncc2)[C@H](O)[C@@H]1O	331.084	-1.858	-7.5	10	32	6	6	4	8
CHEMBL610301	CCC(=O)N(O)c1ncnc2c1ncn2C3O[C@H](CO)[C@@H](O)[C@@]3(C)O	353.134	-1.04	-7.5	9	22	1	7	4	7
CHEMBL108166	CNc1nc(Cl)nc2c1ncn2CCC(COP(=O)(O)O)COP(=O)(O)O	445.032	0.746	-7.5	12	30	2	6	5	9
ZINC000408980738	COc1cc(/C=N/NC(=N)N[N+](=O)[O-])c(Br)cc1OCC(=O)O	388.997	0.561	-7.5	9	18	2	4	5	8
CHEMBL1172167	OC[C@H]1O[C@H](Oc2ccc3NC(=O)Oc3c2)[C@@H](O)[C@@H](O)[C@@H]1O	313.08	-1.7	-7.4	10	20	2	5	4	7
CHEMBL2303954	OC[C@H]1O[C@H](Oc2ccccc2c3cccc(CCS(=O)(=O)O)c3)[C@@H](O)[C@H](O)[C@@H]1O	440.114	-0.037	-7.4	7	27	4	2	4	7

## Sheet: Methionine Aminopeptidase
ID	SMILES	MW	logP	Affinity score	Number of bonds	numAtoms	numRings	numRotBonds	numHDon	numHAcc
CHEMBL376259	N[C@@H]1C[C@H](N)CN(C1)c2nc(Nc3cccc(c3)C(F)(F)F)nc(n2)N4C[C@H](N)C[C@H](N)C4	466.253	0.363	-9	7	33	4	4	5	10
CHEMBL3913373	Oc1ccc(NC(=O)NNC(=O)C2C(=O)NC(=O)N(C2=O)c3ccccc3)cc1[N+](=O)[O-]	442.087	0.352	-9	11	32	3	4	5	8
CHEMBL1869608	OC(C(O)C(O)C1=NC2C=CC=CC2=N1)C(O)C3=NC4C=CC=CC4=N3	354.133	-0.875	-8.9	9	26	4	5	4	8
CHEMBL1962731	NC(=N)NC(=O)c1nc(Cl)c(NCCS(=O)(=O)Cc2ccccc2)nc1N	411.088	0.362	-8.9	15	27	2	7	5	8
ZINC000009871302	C[C@]1(c2cccc(-n3cnnn3)c2)NC(=O)N(CC(=O)Nc2ccc3[nH]c(=O)[nH]c3c2)C1=O	447.14	0.238	-8.8	11	33	5	5	4	8
CHEMBL361060	NCC[C@@H](NC(=O)c1oc(cc1)c2cccc(NC(=O)c3nncs3)c2)C(=O)N4CCNCC4	483.169	0.929	-8.7	10	34	4	8	4	9
ZINC000004403202	O=C(OC[C@@H](O)[C@@H](O)[C@H](O)[C@H](O)COC(=O)c1ccccc1)c1ccccc1	390.131	0.144	-8.7	10	28	2	9	4	8
CHEMBL3606098	O[C@H]1C[C@@H](O[C@@H]1COP(=O)(O)C(F)(F)P(=O)(O)O)N2C=C(F)C(=O)NC2=O	440	-0.746	-8.6	10	27	2	6	5	8
CHEMBL1178260	NC(=N)c1ccc(cc1)C2=NOC(CC(=O)NC[C@H](NS(=O)(=O)c3cccs3)C(=O)O)C2	479.093	0.463	-8.5	11	32	3	10	5	8
CHEMBL1909807	Cl.NC(=N)NC(=O)c1nc(Cl)c(NCCS(=O)(=O)Cc2ccccc2)nc1N	447.065	0.784	-8.5	11	28	2	7	5	8
ZINC000002689496	Nc1ccc(S(=O)(=O)NC(=O)CCCCC(=O)NS(=O)(=O)c2ccc(N)cc2)cc1	454.098	0.721	-8.5	13	30	2	9	4	8
CHEMBL3211188	Cc1cc(Cl)ccc1OCC(=O)N\N=C\c2ccc(OC3OC(CO)C(O)C(O)C3O)cc2	480.13	0.356	-8.5	11	33	3	8	5	9
ZINC000244778749	CNc1cc([C@H]2C[C@@H](NC(=O)c3c[nH]nc3-n3cnnn3)C2)nc(N)n1	355.162	-0.525	-8.5	18	26	4	5	4	10
CHEMBL1683320	O[C@@H]1[C@@H](COP(=O)(O)O)O[C@H]([C@@H]1O)n2cc(nn2)c3ccc(F)cc3	375.063	-0.187	-8.4	10	25	3	5	4	8
CHEMBL1797670	COc1c(O)cc(\C=C\C(=O)C[C@@H]2O[C@H](CO)[C@H](O)[C@H](O)[C@H]2O)cc1[N+](=O)[O-]	399.117	-0.876	-8.4	11	28	2	7	5	10
CHEMBL1683323	O[C@@H]1[C@@H](COP(=O)(O)O)O[C@H]([C@@H]1O)n2cc(nn2)c3ccccc3F	375.063	-0.187	-8.4	9	25	3	5	4	8
ZINC000006016588	COC(=O)C(C(=O)CSc1nnc(O)[nH]c1=O)=C1Nc2ccccc2N1	375.064	0.454	-8.4	11	26	3	5	4	10
CHEMBL2071198	Cn1cc(Nc2ncc(C(=O)N)c(N[C@@H]3[C@@H]4C[C@@H](C=C4)[C@@H]3C(=O)N)n2)cn1	368.171	0.141	-8.3	11	27	4	6	4	8
CHEMBL1091550	CCN(Cc1ccccc1)c2cn(nn2)[C@@H]3O[C@H](CO)[C@H](O)[C@H](O)[C@H]3O	364.175	-0.723	-8.3	8	26	3	6	4	9
ZINC000006142039	Cc1nc(CC(=O)c2ccc(OC[C@@H]3O[C@@H](CO)[C@@H](O)[C@@H](O)[C@H]3O)cc2O)cs1	425.114	-0.196	-8.3	10	29	3	7	5	10
ZINC000005672483	CCOC(=O)/C(C(=N)NN)=C1\NN=C(c2ccc(OC)cc2)O1	319.128	0.192	-8.3	16	23	2	5	4	8
CHEMBL3914515	NS(=O)(=O)OC[C@H]1C[C@@H](Nc2nc(N[C@H]3CCc4ccccc34)ncc2F)[C@H](O)[C@@H]1O	453.148	0.457	-8.3	12	31	4	7	5	9
ZINC000033707737	Cc1cc(=O)oc2cc(O[C@H]3O[C@@H](COS(=O)(=O)O)[C@@H](O)[C@@H](O)[C@H]3O)ccc12	418.057	-0.893	-8.3	12	28	3	5	4	10
CHEMBL2357611	COc1ccc(Cl)cc1c2noc(n2)[C@@H]3O[C@H](CO)[C@H](O)[C@H](O)[C@H]3O	372.072	-0.087	-8.3	9	25	3	4	4	9
ZINC000002315605	O=C(NCCNC(=O)c1ccc(O)nn1)c1ccc(O)nn1	304.092	-1.162	-8.3	10	22	2	5	4	8
CHEMBL2013178	N\C(=N/O)\c1nc(Cl)c(NCC(=O)OCc2ccccc2)nc1N	350.089	0.962	-8.3	10	24	2	6	4	8
CHEMBL3969463	CN1C(=O)C(C(=O)NNC(=O)Nc2ccc(O)c(c2)[N+](=O)[O-])C(=O)N(C)C1=O	394.087	-0.88	-8.2	9	28	2	3	4	8
CHEMBL3230007	CC(=O)C1=C(O)\C(=C(/O)\Nc2cccc(NC(=O)C(=O)O)c2)\C(=O)OC1=O	376.054	0.376	-8.2	10	27	2	4	5	9
CHEMBL3642930	CC(Cc1occ(c1)C(=O)Oc2ccc(cc2)C(=N)N)C(=O)N[C@@H](CS(=O)(=O)O)C(=O)O	467.1	0.419	-8.2	13	32	2	10	5	8
ZINC000101268500	N=C(N)NS(=O)(=O)c1ccc(NC=C2C(=O)OC3(CCCCC3)OC2=O)cc1	408.11	0.915	-8.2	9	28	3	4	4	8
CHEMBL3800386	CO[C@H]1O[C@H]([C@@H](O)CNS(=O)(=O)c2ccc(C)cc2)[C@@H](O)[C@H](O)[C@@H]1O	377.114	-1.912	-8.1	13	25	2	6	5	8
ZINC000009120571	CC(=O)Nc1ccc(S(=O)(=O)NCC(=O)OCC(=O)Nc2sccc2C(N)=O)cc1	454.062	0.266	-8.1	12	30	2	9	4	8
CHEMBL3142997	O[C@H]1C[C@@H](O[C@@H]1COP(=O)(O)CC(=O)O)N2C=C(C=C)C(=O)NC2=O	376.067	-0.885	-8.1	12	25	2	7	4	8
ZINC000524730430	COc1cc([C@H](CC(=O)NCCS(N)(=O)=O)c2oc(C)cc(=O)c2O)ccc1O	426.11	0.295	-8.1	13	29	2	8	4	8
ZINC000040266417	CCC(CO)(CO)NC(=O)c1nc(CC(=O)Nc2cc(C)on2)no1	353.134	-0.59	-8.1	15	25	2	8	4	9
CHEMBL3937993	CC1(N)CCN(CC1)c2cccnc2NC(=O)c3nc(cnc3N)c4nc(ncc4F)C(=O)N	466.199	0.719	-8	8	34	4	5	4	10
CHEMBL329917	CC(=O)N[C@@H](CC(=O)O)C(=O)N[C@H]1CCC[C@H]2SC[C@H](N2C1=O)C(=O)N[C@H]3CC(=O)OC3O	486.142	-2.345	-8	17	33	3	7	5	9
ZINC000012611909	Cc1oc([C@H](O)[C@@H](O)[C@@H](O)CO)cc1C(=O)OCc1ccccc1C#N	361.116	0.564	-8	15	26	2	7	4	8
CHEMBL2106191	[Ca+2].Oc1ccc(O)c(c1)S(=O)(=O)[O-].Oc2ccc(O)c(c2)S(=O)(=O)[O-]	417.934	-0.377	-8	11	25	2	2	4	10
ZINC000095921675	Cc1cc(=O)oc2cc(O[C@@H]3O[C@H](C(=O)O)[C@@H](O)[C@H](O)[C@H]3O)c(Cl)cc12	386.04	0.026	-8	9	26	3	3	4	8
ZINC000017174118	Cc1cc(C)nc(NS(=O)(=O)c2ccc(NC=C3C(=O)NC(=O)NC3=O)cc2)n1	416.09	0.556	-8	11	29	3	5	4	8
CHEMBL133039	[Na+].COc1ccc(CCC(=N)c2c(O)cc(OCC(=O)[O-])cc2O)cc1O	383.098	-2.055	-8	10	27	2	8	4	8
CHEMBL1093436	OP(=O)(O)C(CCCCOc1no[n+]([O-])c1S(=O)(=O)c2ccccc2)P(=O)(O)O	472.011	0.371	-8	16	29	2	10	4	8
ZINC000101152015	C/C(NCCNC(=O)c1nnc(N)[nH]1)=C1/C(=O)NC(=O)SC1=O	339.075	-1.51	-8	15	23	2	5	5	9
ZINC000670449788	Cc1cc(O)nc(CCNC(=O)Cc2c(C)nc(O)nc2O)n1	319.128	-0.098	-8	16	23	2	5	4	8
CHEMBL4099388	O[C@@H]1[C@@H](COS(=O)(=O)O)O[C@H]([C@H](O)[C@H]1O)n2cc(nn2)c3ccccc3	387.074	-1.255	-8	11	26	3	5	4	10
CHEMBL1205886	FC(F)(F)c1cc(NC(=O)c2nnn[nH]2)c(Cl)c(NC(=O)c3nnn[nH]3)c1	402.032	0.89	-8	12	27	3	4	4	8
CHEMBL3908950	CSc1ccc(Cc2c(C)[nH]nc2O[C@@H]3O[C@H](CO)[C@@H](O)[C@H](O)[C@H]3O)cc1	396.136	0.21	-8	8	27	3	6	5	8
ZINC000199197855	N[C@@H](Cc1ccccc1)C(=O)OCC(=O)[C@@H](O)[C@H](O)[C@H](O)CO	327.132	-2.256	-8	13	23	1	9	5	8
ZINC000023079891	O=C(COC(=O)c1ccc(O)cc1O)N1CCN(C(=O)COC(=O)c2ccc(O)cc2O)CC1	474.127	0.194	-7.9	10	34	3	6	4	10
CHEMBL491204	COc1ccc(cc1)[C@@H](CNC(=O)\C=C\c2ccccc2)O[C@@H]3O[C@H](CO)[C@@H](O)[C@H](O)[C@H]3O	459.189	0.382	-7.9	9	33	3	9	5	8
ZINC000016682972	CCOC(=O)[C@@H](O)[C@H](O)[C@H](O)[C@@H](O)c1nnc2ccccc2n1	323.112	-1.296	-7.9	15	23	2	6	4	9
CHEMBL1165557	COc1cc(ccc1\C=C\2/CCCN=C2c3cccnc3)C(=O)[C@H]4O[C@@H](O)[C@H](O)[C@@H](O)[C@@H]4O	454.174	0.739	-7.9	10	33	4	5	4	9
CHEMBL612212	O[C@H]1[C@H](O)C(O[C@@H]1COP(=O)(O)CC(=O)O)N2C=C(C=C)C(=O)NC2=O	392.062	-1.915	-7.8	11	26	2	7	5	9
CHEMBL1963586	OC[C@H]1O[C@H](OCc2cn(nn2)c3cccc(c3)C(=O)O)[C@@H](O)[C@@H](O)[C@@H]1O	381.117	-1.718	-7.8	12	27	3	6	5	10
CHEMBL1205895	Clc1cc(NC(=O)c2nnn[nH]2)nc(NC(=O)c3nnn[nH]3)c1	335.039	-0.734	-7.8	10	23	3	4	4	9
CHEMBL3797765	CC(C)C[C@H](NC(=O)[C@@H](O)[C@H]1OC(=O)C[C@@H]1N)[C@@H]2Cc3cccc(O)c3C(=O)O2	406.174	0.008	-7.8	11	29	3	6	4	8
ZINC000827847787	Cc1nc(C)c(CC(=O)NCCc2nc(N)cc(O)n2)c(O)n1	318.144	-0.222	-7.8	12	23	2	5	4	8
CHEMBL1962613	COC(=O)CNc1nc(N)c(nc1Cl)C(=O)NC(=N)N	301.069	-1.08	-7.8	11	20	1	4	5	8
ZINC000001757527	Cc1ccc(S(=O)(=O)OC[C@H](O)[C@@H](O)[C@H](O)[C@H](O)CO[N+](=O)[O-])cc1	381.073	-1.648	-7.8	14	25	1	10	4	10
ZINC000008624434	CNCc1cn(C[C@H]2O[C@@H](CC(=O)NC(C)C)[C@H](O)[C@@H]2O)nn1	327.191	-1.599	-7.8	11	23	2	7	4	8
ZINC000001748574	O=c1[nH]nc(SCc2ccc(CSc3n[nH]c(=O)[nH]c3=O)cc2)c(=O)[nH]1	392.036	-0.186	-7.8	12	26	3	6	4	8
ZINC000108248228	C/C(NCCNC(=O)c1nnc(N)[nH]1)=C1/C(=O)C=C(C)OC1=O	320.123	-0.99	-7.8	13	23	2	5	4	8
CHEMBL3248258	CC(=O)C1=C(O)\C(=C(/C)\Nc2cccc(c2)C(=O)NC3C(=O)NC(=O)NC3=O)\C(=O)OC1=O	456.092	-0.679	-7.8	9	33	3	5	5	10
ZINC000024984113	CC(C)(C)[C@@H](NC(=O)OCc1ccccc1)C(=O)OC[C@H]1O[C@@H](O)[C@@H](O)[C@@H](O)[C@@H]1O	427.184	-0.329	-7.7	11	30	2	6	5	9
CHEMBL1765881	COC(=O)C1(O)C[C@@H](O)[C@@H](O)[C@@H](C1)OC(=O)\C=C\c2ccc(O)c(O)c2	368.111	-0.558	-7.7	12	26	2	4	5	9
ZINC000022357946	C[C@]1(NC(=O)CNc2cc([N+](=O)[O-])ccc2NCCO)CCS(=O)(=O)C1	386.126	0.104	-7.7	12	26	2	8	4	8
CHEMBL3248765	O=C(Nc1nnn[nH]1)C2=CC(=O)c3cc(ccc3O2)C(=O)Nc4nnn[nH]4	368.073	-0.676	-7.7	9	27	4	4	4	10
ZINC000252479561	Nc1cc(N)nc(SCC(=O)NCc2ccc(S(N)(=O)=O)cc2)n1	368.073	-0.303	-7.7	14	24	2	6	4	8
CHEMBL311075	CC1=CN(C2CC(N=[N+]=[N-])C(COP(=O)(O)P(=O)(O)P(=O)(O)O)O2)C(=O)NC1=O	475.006	0.292	-7.7	9	29	2	7	5	9
CHEMBL1192732	Cn1cc(NC(=O)c2cc(NC(=O)Cn3ccnc3[N+](=O)[O-])cn2C)cc1C(=O)NCCC(=N)N	484.193	0.415	-7.7	12	35	3	10	5	10
ZINC000016671631	O=C(Cn1c[n+](N[N+](=O)[O-])cn1)Nc1ccc(NC(=O)Cn2c[n+](N[N+](=O)[O-])cn2)cc1	448.13	-2.598	-7.7	12	32	3	10	4	10
ZINC000005349437	C[C@@H](NC(=O)CSc1ncnc2[nH]cnc21)C(=O)N[C@H](CCC(=O)O)C(N)=O	409.117	-1.215	-7.7	10	28	2	10	5	8
CHEMBL608058	CC(=O)C1=CN(C2O[C@H](COP(=O)(O)CC(=O)O)[C@@H](O)[C@@H]2O)C(=O)NC1=O	408.057	-2.355	-7.7	15	27	2	7	5	10
ZINC000223144840	Cc1cc(=O)[nH]c(S[C@H](C)C(=O)NCCc2nc(N)cc(O)n2)n1	350.116	-0.004	-7.7	11	24	2	6	4	8
ZINC000225438270	CC(C)(C)c1cc(/C=N/NC2=NCCN2)c(O)c(/C=N/NC2=NCCN2)c1	370.223	0.455	-7.7	9	27	3	4	5	9
CHEMBL3910424	Nc1ccc(cc1)S(=O)(=O)Nc2ccc(cc2)S(=O)(=O)Nc3nnc(s3)S(=O)(=O)N	489.986	0.369	-7.7	10	30	3	7	4	10
CHEMBL1085771	CSc1ccc(Cc2cc(ccc2Cl)[C@@H]3O[C@H](CO)[C@@H](O)[C@H](O)[C@H]3O)nn1	412.086	0.958	-7.7	9	27	3	5	4	8
CHEMBL552354	COc1ccc(cc1)C2=NN\C(=N/N=C/C(O)C(O)C(O)CO)\C(=C2)Cc3ccccc3OC	468.201	0.646	-7.7	13	34	3	10	5	9
ZINC001560411821	CCNC(=O)c1oc(-n2cnc3c2ncnc3N)c(O)c1O	304.092	0.152	-7.6	11	22	3	3	4	9
ZINC000409185831	CCOC(=O)c1ccc(NC(=O)C(=O)NCc2ccc(C=C3C(=O)NC(=O)NC3=O)o2)cc1	454.112	0.461	-7.6	9	33	3	6	4	8
CHEMBL560323	OC[C@H]1O[C@H]([C@H](O)[C@@H](O)[C@@H]1O)c2noc(n2)c3cccc4ccccc34	358.116	0.405	-7.6	9	26	4	3	4	8
CHEMBL472793	Cc1c(nnn1Cc2ccccc2)C(=O)OC[C@H]3O[C@H](O)[C@H](O)[C@@H](O)[C@H]3O	379.138	-1.408	-7.6	12	27	3	5	4	10
CHEMBL3229853	CNC(=O)c1cccc(N\C(=C/2\C(=C(C(=O)C)C(=O)OC2=O)O)\O)c1	346.08	0.712	-7.6	11	25	2	4	4	8
CHEMBL216916	Cc1cc(C)cc(Nc2nc(nc(n2)N3C[C@H](N)C[C@H](N)C3)N4C[C@H](N)C[C@H](N)C4)c1	426.297	-0.039	-7.6	9	31	4	4	5	10
CHEMBL3221802	O[C@@H]1C[C@@](O)(C=C([C@H]1O)c2cn(nn2)c3ccccc3O)C(=O)O	333.096	-0.703	-7.6	11	24	3	3	5	8
CHEMBL196998	COc1cccc(\C=N\O[C@@H]2OC(CO)C(O)[C@H](O)C2O)c1O	329.111	-1.449	-7.6	13	23	2	5	5	9
ZINC000253535346	Cn1cc([C@@H](NC(=O)Cc2cc(O)nc(N)n2)[C@H]2C[C@@H](O)C2)cn1	332.16	-0.331	-7.6	11	24	3	5	4	8
CHEMBL178393	CC1=C(SC2CCCCC2)N(COCNC(=O)CNCP(=O)(O)O)C(=O)NC1=O	450.134	0.042	-7.6	9	29	2	10	5	8
CHEMBL3248251	CC(=O)C1=C(O)\C(=C(/C)\Nc2cccc(NC(=O)C(=O)C(=O)O)c2)\C(=O)OC1=O	402.07	0.449	-7.6	10	29	2	6	4	9
CHEMBL2028483	[Na+].OC(C(O)C(O)c1nc2ccccc2s1)C(O)C(=O)[O-]	321.028	-4.834	-7.6	10	21	2	5	4	8
CHEMBL608390	OC[C@H]1O[C@@]2(CC(=NO2)c3ccc(cc3)[N+](=O)[O-])[C@H](O)[C@@H](O)[C@@H]1O	340.091	-1.111	-7.6	11	24	3	3	4	9
CHEMBL477284	OC(=O)CNC(=O)CNC(=O)CNC(=O)c1cc(cc(c1)[N+](=O)[O-])[N+](=O)[O-]	383.071	-1.45	-7.6	11	27	1	9	4	8
CHEMBL3229968	CC(=O)C1=C(O)\C(=C(/O)\Nc2cc(N)cc(N)c2)\C(=O)OC1=O	319.08	0.517	-7.5	13	23	2	3	5	9
ZINC000253535272	COc1cncc([C@@H](NC(=O)c2cc(O)nc(O)n2)[C@H]2C[C@@H](O)C2)c1	346.128	0.533	-7.5	10	25	3	5	4	8
CHEMBL1254856	Nc1nc(N)c2nc(CNCCc3ccc(cc3)S(=O)(=O)N)cnc2n1	374.127	-0.436	-7.5	9	26	3	6	4	9
CHEMBL2159432	CC(C)c1[nH]nc(O[C@@H]2O[C@H](CO)[C@@H](O)[C@H](O)[C@H]2O)c1Cc3ccccc3C#N	403.174	0.174	-7.5	9	29	3	6	5	8
CHEMBL1206766	C[C@]1(COC(=O)Cc2ccc(O)c(O)c2)[C@@H](N3C(\C(=C/C(=O)O)\C3=O)S1(=O)=O)C(=O)O	455.052	-0.997	-7.5	14	31	3	6	4	9
CHEMBL37605	NC(=O)C1OC(Sc2[nH]cnc3ncnc23)C(O)C(O)C1O	327.064	-2.31	-7.5	14	22	3	3	5	9
ZINC000009512130	CCNC(=O)NC(=O)[C@@H](C)OC(=O)CNS(=O)(=O)c1ccc(NC)c([N+](=O)[O-])c1	431.111	-0.308	-7.5	15	29	1	9	4	9
ZINC000253534904	CNc1cc([C@H]2C[C@@H](NC(=O)Cc3c(C)nc(O)nc3O)C2)ncn1	344.16	0.633	-7.5	9	25	3	5	4	8
ZINC000073667149	CCNc1nc(NCC)nc(NNC(=S)NC[C@H]2CCS(=O)(=O)C2)n1	388.146	-0.039	-7.5	11	25	2	8	5	9
CHEMBL420921	Nc1ncnc2c1ncn2OCC(CO)CCP(=O)(O)O	317.089	-0.987	-7.5	17	21	2	7	4	8
CHEMBL145474	Nc1ncnc2c1ncn2\C=C\3/CC3COP(=O)(O)P(=O)(O)P(=O)(O)O	425.006	0.749	-7.5	21	26	3	6	5	9
CHEMBL556631	COc1ccc(cc1)c2oc(nn2)[C@@H]3O[C@H](CO)[C@@H](O)[C@H](O)[C@H]3O	338.111	-0.74	-7.5	10	24	3	4	4	9
CHEMBL231053	O[C@H](Cn1ccnc1)[C@@H](O)[C@H](O)[C@H](O)Cn2ccnc2	282.133	-1.777	-7.5	12	20	2	7	4	8
CHEMBL3198889	OC(C(O)C(=O)N\N=C\c1occc1)C(=O)N\N=C\c2occc2	334.091	-0.805	-7.5	12	24	2	7	4	8
CHEMBL3229851	CC(=O)C1=C(O)\C(=C(/O)\Nc2cccc(c2)C(=O)N)\C(=O)OC1=O	332.064	0.451	-7.5	11	24	2	4	4	8
ZINC000220973999	C/C(=N\NC1=NCCN1)c1cccc(/C(C)=N/NC2=NCCN2)n1	327.192	-0.373	-7.5	11	24	3	4	4	9
ZINC000244866646	Nc1nc(NCCSc2ncn[nH]2)cc([C@H]2C[C@@H](O)C2)n1	307.122	0.619	-7.5	10	21	3	6	4	8
CHEMBL1171651	CS(=O)(=O)Nc1cccc(c1)c2ccc(O[C@H]3O[C@H](CO)[C@@H](O)[C@H](O)[C@@H]3O)cc2	425.114	-0.096	-7.5	13	29	3	6	5	8
CHEMBL3805590	COC(=O)CC[C@H](NC(=O)CNc1nc(NC(=O)C)nc2[nH]cnc12)C(=O)OC	407.155	-0.666	-7.5	10	29	2	9	4	10
CHEMBL219798	COC(=O)CC[C@H](NC(=O)CNc1nc(NC(=O)C)nc2[nH]cnc12)C(=O)OC	322.234	-2.817	-7.5	10	23	3	2	5	10
