# Supplementary material for: Identification of Potential Druggable Targets and Structure-Based Virtual Screening for Drug-like Molecules against the Shrimp Pathogen Enterocytozoon hepatopenaei
Source: Int J Mol Sci. 2023 Jan 11;24(2):1412. doi: 10.3390/ijms24021412 (PMC9867128; doi:10.3390/ijms24021412)
Supplement: Supplementary file 1 [file ijms-24-01412-s001.zip › Table S3.xlsx]

## Sheet: Aquaporin
Table S3. Compounds screened based on EC score
ID	SMILES	MW	logP	Affinity	Number of bonds	numAtoms	numRings	numRotBonds	numHDon	numHAcc	EC	Ecr	Ecrho	Patch dock score
CHEMBL3703838	OC[C@H]1O[C@H]([C@H](O)[C@@H](O)[C@@H]1O)c2ccc(Cl)c(Cc3ccc4OCCS(=O)(=O)c4c3)c2	470.08	0.612	-8	9	25	2	5	5	7	0.286	0.337	0.355	4876
ZINC000095480920	O=c1cc(CO)oc(C(c2cccc(OC(F)F)c2)c2oc(CO)cc(=O)c2O)c1O	438.076	1.77	-7.8	9	21	2	6	4	8	0.298	0.456	0.336	4064
CHEMBL3238479	[NH3+]c1cc(cc2C=C(\C(=N\Nc3ccc(cc3F)C(=O)O)\C(=O)c12)S(=O)(=O)O)S(=O)(=O)[O-]	485	0.195	-7.7	9	25	3	3	4	7	0.271	0.307	0.235	4076
CHEMBL4069291	CSc1ccc(C(=O)O)c2nc3cccc(O[C@@H]4O[C@@H](C)[C@H](O)[C@@H](O)[C@H]4O)c3nc12	432.099	1.409	-7.6	10	33	4	4	4	7	0.251	0.291	0.308	4196
CHEMBL3237581	CC(C)c1nc(Nc2cc(NCCN)nnc2C(=O)N)ccc1F	333.171	1.347	-7.6	9	32	4	2	5	8	0.249	0.237	0.242	4370
ZINC000002243083	O=S(=O)(O)c1cc2cc(S(=O)(=O)O)c(O)cc2c(S(=O)(=O)O)c1	383.928	0.286	-7.6	9	32	3	8	5	9	0.302	0.451	0.325	4865
CHEMBL133039	[Na+].COc1ccc(CCC(=N)c2c(O)cc(OCC(=O)[O-])cc2O)cc1O	383.098	-2.055	-7.6	9	24	2	7	4	7	0.337	0.448	0.549	4596
CHEMBL390487	COc1cc(CCOc2cc(O)c3C(=O)C=C(Oc3c2)C(=O)O)ccc1NC(=O)C(=O)O	443.085	1.85	-7.5	9	23	2	5	4	7	0.263	0.403	0.361	4848
ZINC000252618412	C[C@@H]1O[C@H](Nc2ccc(S(=O)(=O)O)cc2)[C@H](O)[C@@H](O)[C@@H]1O	319.073	-0.827	-7.5	9	25	3	4	4	8	0.295	0.528	0.505	4006
CHEMBL3140193	OC[C@H]1O[C@@H](S\C(=N/OS(=O)(=O)O)\c2cccc(Cl)c2Cl)[C@H](O)[C@@H](O)[C@@H]1O	462.957	0.008	-7.5	9	21	2	3	4	7	0.295	0.361	0.341	4732
CHEMBL3764497	OCc1c(O)c(ncc1CS(=O)(=O)Cc2ccc(F)cc2)C(=O)NO	370.063	0.653	-7.5	9	24	3	5	4	9	0.309	0.466	0.473	4406
CHEMBL2132563	OC[C@H]1O[C@H]([C@H](O)[C@@H](O)[C@H]1O)c2nc(cs2)c3onc(n3)c4ccc(F)cc4	409.074	0.514	-7.5	9	30	3	8	5	7	0.289	0.303	0.31	4720

## Sheet: CTP Synthase
ID	SMILES	MW	logP	Affinity score	Number of bonds	numAtoms	numRings	numRotBonds	numHDon	numHAcc	EC	Ecr	Ecrho	Patch Dock score
CHEMBL48494	NC1C(O)C(O)C(O)OC1OCc2ccc3C(=O)c4ccccc4C(=O)c3c2	385.116	-0.298	-9.6	11	28	4	3	4	8	0.331	0.249	0.284	5998
CHEMBL1162979	[Na+].OC[C@H]1O[C@@H](Cc2cc(O)cc(\C=C/c3ccc(O)cc3)c2)[C@H](O)[C@@H](OS(=O)(=O)[O-])[C@@H]1O	490.091	-2.858	-8.6	16	33	3	7	5	10	0.301	0.467	0.459	5250
CHEMBL610629	OC[C@H]1O[C@@H](NC(=O)C2=COc3ccccc3O2)[C@H](O)[C@@H](O)[C@@H]1O	339.095	-1.785	-8.4	9	24	3	3	5	8	0.289	0.326	0.263	4546
CHEMBL133039	[Na+].COc1ccc(CCC(=N)c2c(O)cc(OCC(=O)[O-])cc2O)cc1O	383.098	-2.055	-8.3	12	27	2	8	4	8	0.296	0.409	0.421	5496
CHEMBL3606098	O[C@H]1C[C@@H](O[C@@H]1COP(=O)(O)C(F)(F)P(=O)(O)O)N2C=C(F)C(=O)NC2=O	440	-0.746	-8.3	13	27	2	6	5	8	0.261	0.466	0.369	5078
CHEMBL525202	Cc1nc(NCc2ccccc2)sc1C[C@@H]3O[C@H](CO)[C@H](O)[C@H](O)[C@H]3O	380.141	0.449	-8.1	11	26	3	6	5	8	0.291	0.367	0.429	5494
ZINC000101152015	C/C(NCCNC(=O)c1nnc(N)[nH]1)=C1/C(=O)NC(=O)SC1=O	339.075	-1.51	-8.1	17	23	2	5	5	9	0.256	0.342	0.394	5044
CHEMBL3144476	Nc1ncnc2c1ncn2[C@H]3C[C@H](OP(=S)(O)O)[C@@H](COP(=S)(O)O)O3	442.989	-0.484	-8	9	26	3	6	5	10	0.233	0.341	0.331	5664
CHEMBL1205313	CC(C)(O\N=C(\C(=O)N[C@H]1CN(C1=O)S(=O)(=O)O)/c2csc(N)n2)C(=O)O	421.036	-1.561	-8	10	27	2	7	4	10	0.261	0.363	0.351	5966
CHEMBL1207388	O[C@H]1[C@H](O)[C@H]2[C@@H](NC(=O)c3c(O)c4OCOc4cc23)[C@@H]5OP(=O)(O)O[C@H]15	387.036	-1.064	-8	10	26	5	0	5	9	0.391	0.646	0.612	4634
CHEMBL2028483	[Na+].OC(C(O)C(O)c1nc2ccccc2s1)C(O)C(=O)[O-]	321.028	-4.834	-7.9	9	21	2	5	4	8	0.29	0.437	0.332	4222
ZINC000002818155	CC(C)(CO)NS(=O)(=O)c1ccc2c(c1)C(=NO)c1cc(S(=O)(=O)NC(C)(C)CO)ccc1-2	497.129	0.992	-7.8	9	33	3	8	5	8	0.292	0.441	0.402	5272
ZINC000827847787	Cc1nc(C)c(CC(=O)NCCc2nc(N)cc(O)n2)c(O)n1	318.144	-0.222	-7.8	10	23	2	5	4	8	0.323	0.326	0.334	4838
ZINC001772492702	C[C@@H](O)[C@@H](O)O[C@H](COC(=O)[C@@H]1CCCN1C(=O)OCc1ccccc1)[C@@H](O)CO	427.184	-0.232	-7.6	9	30	2	10	4	9	0.296	0.476	0.418	4506
ZINC000110424093	O=S(=O)(O)O/N=C(\Cc1ccccc1)S[C@@H]1O[C@H](CO)[C@H](O)[C@@H](O)[C@H]1O	409.05	-1.105	-7.6	11	26	2	6	5	10	0.324	0.403	0.452	4750
CHEMBL1091856	OC(CCCCOc1nonc1S(=O)(=O)c2ccccc2)(P(=O)(O)O)P(=O)(O)O	472.011	0.453	-7.6	17	29	2	10	5	9	0.297	0.408	0.364	5128
ZINC000223652489	Nc1nnc(CCC(=O)N[C@@H]2COCC[C@@H]2OCC(=O)O)c(=O)[nH]1	341.134	-1.945	-7.5	9	24	2	7	4	8	0.278	0.337	0.453	4386

## Sheet: Thymidine Kinase
ID	SMILES	MW	logP	Affinity	Number of bonds	numAtoms	numRings	numRotBonds	numHDon	numHAcc	EC	Ecr	Ecrho	Patch dock score
CHEMBL3674540	NC(=O)NNC(=N)c1cnc2nnn(Cc3ccc4ncccc4c3)c2n1	362.135	0.316	-9.5	11	27	4	3	4	8	0.286	0.389	0.433	5618
CHEMBL1683320	O[C@@H]1[C@@H](COP(=O)(O)O)O[C@H]([C@@H]1O)n2cc(nn2)c3ccc(F)cc3	375.063	-0.187	-8.6	15	25	3	5	4	8	0.267	0.352	0.38	5888
CHEMBL391279	CNC(=O)[C@]12CN[C@H]([C@@H]1O)[C@@H](O2)n3cnc4c(N)ncnc34	305.124	-2.245	-8.3	16	22	4	2	4	9	0.329	0.46	0.521	5702
CHEMBL3925381	NS(=O)(=O)NCCCNc1nonc1\C(=N\O)\Nc2cccc(c2)C(F)(F)F	423.094	0.931	-8.3	10	28	2	8	5	8	0.285	0.363	0.364	4570
ZINC000031750813	n1n[nH]c(C2=NN=C(c3nnn[nH]3)NN2)n1	220.068	-3.071	-8.2	14	16	3	2	4	10	0.308	0.531	0.449	6210
CHEMBL607774	CCCCCOC(=O)NC1=NC(=O)N(C=C1F)C2O[C@@H]([C@@H](O)[C@H]2O)C(=O)O	389.123	-0.175	-8.2	9	27	2	7	4	9	0.254	0.353	0.323	4650
ZINC000008651709	COC(=O)[C@@H]1O[C@@H](Sc2ncnc3[nH]cnc32)[C@@H](O)[C@@H](O)[C@H]1O	342.063	-1.574	-8.1	14	23	3	3	4	10	0.323	0.465	0.466	4748
CHEMBL4078273	CCCCCCc1ccc(O[C@@H]2O[C@H](COS(=O)(=O)O)[C@@H](O)[C@H](O)[C@H]2O)cc1	420.145	0.815	-8.1	12	28	2	10	4	8	0.312	0.378	0.352	5638
CHEMBL438530	OC[C@@H](O)[C@@H](O)[C@H](OC(=O)c1nn(Cc2cc(Cl)cc(Cl)c2)c3ccccc13)[C@H](O)CO	484.08	0.984	-7.9	13	32	3	9	5	9	0.291	0.407	0.412	5040
CHEMBL1871055	OC[C@H]1O[C@H]([C@H](O)[C@@H](O)[C@H]1O)c2onc(n2)c3ccc4OCCc4c3	350.111	-0.814	-7.9	10	25	4	3	4	9	0.304	0.492	0.471	4642
CHEMBL3606035	O[C@H]1[C@@H](O)[C@@H](O[C@@H]1COP(=O)(O)CS(=O)(=O)O)N2C=CC(=O)NC2=O	402.013	-2.797	-7.7	9	25	2	6	5	10	0.286	0.465	0.565	4322
ZINC000104367695	CCOC(=O)[C@@H](C(=N)C(=N)[C@@H](C(=O)O)C(=O)OCC)C(=O)O	316.091	-0.446	-7.7	12	22	0	9	4	8	0.287	0.441	0.385	4552
ZINC000038819453	Nc1nc(O[C@@H]2O[C@H](C(=O)O)[C@@H](O)[C@H](O)[C@H]2O)ncc1F	305.066	-2.531	-7.6	9	21	2	3	5	9	0.312	0.434	0.471	4116
CHEMBL217391	CCCC1=CC(=O)N([C@@H]2O[C@H](COP(=O)(O)O)[C@@H](O)[C@H]2O)C(=O)N1	366.083	-1.782	-7.5	12	24	2	6	5	8	0.359	0.544	0.619	5356
ZINC000575598468	O=C(O)[C@H]1O[C@@H](Oc2cc3oc(O)nc3cc2Cl)[C@H](O)[C@@H](O)[C@@H]1O	361.02	-0.542	-7.5	11	24	3	3	5	9	0.274	0.408	0.379	4546
ZINC000008742081	O=C(O)c1[nH]nc(-c2n[nH]c(C(=O)O)c2[N+](=O)[O-])c1[N+](=O)[O-]	312.009	0.013	-7.5	13	22	2	5	4	8	0.27	0.235	0.377	3802

## Sheet: Dihydrofolate reductase
ID	SMILES	MW	logP	Affinity score	Number of bonds	numAtoms	numRings	numRotBonds	numHDon	numHAcc	EC	Ecr	Ecrho	Patch Dock score
CHEMBL1966988	NC(=N)NS(=O)(=O)c1ccc(N\N=C/2\CCOC2=O)cc1	311.069	-0.427	-8.7	11	25	2	4	5	8	0.287	0.421	0.464	6342
ZINC000001852448	O=P(O)(O)OC[C@@H]1O[C@H](n2cnc3c2ncnc3NCc2ccccc2)[C@@H](O)[C@H]1O	437.11	0.167	-8.7	9	21	3	2	5	8	0.276	0.371	0.429	4774
ZINC000085399072	CC(=O)Nc1nnc([C@H](O)[C@@H](O)c2cccc(N)c2)s1	294.079	0.846	-8.6	9	25	4	4	5	9	0.311	0.518	0.481	4964
CHEMBL458055	Cc1cccc(c1)S(=O)(=O)NC(=O)NCCNCCNC(=O)NS(=O)(=O)c2cccc(C)c2	497.14	0.569	-8.6	10	33	4	7	5	10	0.316	0.456	0.403
CHEMBL56533	CNC(=O)CCC(NC(=O)c1ccc(cc1)N(C)Cc2cnc3nc(N)nc(N)c3n2)C(=O)O	467.203	-0.07	-8.3	9	28	2	9	4	8	0.298	0.413	0.422	5310
CHEMBL2013185	NC(=NC(=O)c1nc(Cl)c(NCC(=O)OCc2ccccc2)nc1N)N	377.1	0.281	-8.3	9	32	3	6	4	10	0.281	0.447	0.441	5614
CHEMBL1254925	N\C(=N/O)\c1ccc(cc1)C(=O)CS(=O)(=O)c2ccc(cc2)\C(=N\O)\N	376.084	0.532	-8.3	10	26	1	7	5	8	0.258	0.366	0.309	5684
CHEMBL340488	C[C@H](N)C(=O)NS(=O)(=O)OC[C@H]1O[C@H]([C@H](O)[C@@H]1O)c2nc(cs2)c3ccccc3	443.082	-0.303	-8.1	9	14	1	3	5	7	0.311	0.353	0.343	6330
ZINC000257340135	Nc1ncnc2c1ncn2[C@H]1C[C@@H](NC(=O)/C=C/C(=O)O)[C@@H](O)[C@H]1O	348.118	-1.799	-8.1	10	27	3	5	5	7	0.234	0.363	0.381	5176
ZINC000016682862	CCOC(=O)CSc1[nH]c(NC(=S)NC(=O)c2ccccc2)c(C(N)=O)c1C(N)=O	449.083	0.994	-8	11	31	4	4	5	10	0.287	0.408	0.399	7034
CHEMBL3914312	NS(=O)(=O)NCCNc1nonc1\C(=N\O)\NCc2occ(Br)c2	422.996	-0.444	-7.9	12	28	3	8	4	7	0.312	0.358	0.444	5680
CHEMBL2442701	N\C(=N\O)\c1ccc(cn1)c2cncc(n2)c3ccc(nc3)\C(=N\O)\N	350.124	0.79	-7.9	12	23	4	3	4	9	0.257	0.312	0.334	5466
CHEMBL376259	N[C@@H]1C[C@H](N)CN(C1)c2nc(Nc3cccc(c3)C(F)(F)F)nc(n2)N4C[C@H](N)C[C@H](N)C4	466.253	0.363	-7.9	9	24	2	7	5	7	0.296	0.341	0.35	6302
CHEMBL513176	C[C@H](NC(=O)OCc1ccccc1)C(=O)N[C@@H](C)C(=O)NN(CC(=O)N)C(=O)\C=C\c2occc2	485.191	0.458	-7.9	9	25	2	8	4	7	0.259	0.301	0.296	6580
CHEMBL1867897	Cc1nc(O)nc(O)c1S(=O)(=O)Nc2ccc(cc2)S(=O)(=O)N	360.02	-0.356	-7.8	11	22	1	7	5	7	0.259	0.427	0.327	4982
CHEMBL110667	NC(=O)[C@H](Cc1ccccc1)NC(=O)[C@H](Cc2nc3ccccc3s2)[C@H](O)C(=O)NO	442.131	0.534	-7.8	12	22	1	8	5	7	0.269	0.311	0.326	6654
ZINC000828645375	CN(C[C@H](O)[C@H](O)[C@@H](O)[C@H](O)CO)c1oc(-c2ccc(Cl)cc2)nc1C#N	397.104	-0.261	-7.7	14	33	3	8	4	10	0.351	0.518	0.521	6246
CHEMBL1205036	NC(=N)NCCNC(=O)\C=C\C1=C(N2[C@@H](\C(=C/c3ccccn3)\C2=O)S(=O)(=O)C1)C(=O)O	460.117	-1.444	-7.7	10	23	3	3	4	9	0.251	0.308	0.321	6074
CHEMBL1200242	N[C@H](CCC\N=C(\N)/N[N+](=O)[O-])C(=O)N1C[C@H](C[C@@H]1C(=O)N)NC(=O)C(F)(F)F	426.159	-2.677	-7.7	10	14	0	6	5	7	0.253	0.375	0.395	6204
CHEMBL3198889	OC(C(O)C(=O)N\N=C\c1occc1)C(=O)N\N=C\c2occc2	334.091	-0.805	-7.7	9	31	2	6	5	10	0.226	0.394	0.399
CHEMBL4074018	OCc1cccc(O[C@@H]2O[C@H](COS(=O)(=O)O)[C@@H](O)[C@H](O)[C@H]2O)c1	366.062	-1.815	-7.6	9	21	2	5	4	8	0.279	0.422	0.349	4822
ZINC000823193756	CCNc1nc(C)c(C(=O)NCc2nc(N)n[nH]2)s1	281.106	0.514	-7.5	8	20	2	2	5	8	0.264	0.301	0.313	5316
CHEMBL3901573	NS(=O)(=O)OC[C@H]1C[C@@H](NC(=O)c2ccccn2)[C@H](O)[C@@H]1O	331.084	-1.858	-7.5	11	20	2	4	4	7	0.306	0.411	0.369	4990
CHEMBL394336	CC(=O)Nn1c(Cc2csc(NC(=O)CCl)n2)nnc1SCC(=O)NNC(=O)CCl	494.011	0.071	-7.5	9	28	3	6	4	8	0.313	0.323	0.366	6612
ZINC000005227304	O=[N+]([O-])c1ccccc1O[C@@H]1O[C@H](CO)[C@H](O)[C@@H](O)[C@@H]1O	301.08	-1.227	-7.5	11	19	0	7	5	8	0.284	0.541	0.423	4660
CHEMBL108166	CNc1nc(Cl)nc2c1ncn2CCC(COP(=O)(O)O)COP(=O)(O)O	445.032	0.746	-7.5	12	30	2	6	5	9	0.258	0.354	0.311	5798
CHEMBL1172167	OC[C@H]1O[C@H](Oc2ccc3NC(=O)Oc3c2)[C@@H](O)[C@@H](O)[C@@H]1O	313.08	-1.7	-7.4	10	20	2	5	4	7	0.258	0.344	0.292	4516
CHEMBL2303954	OC[C@H]1O[C@H](Oc2ccccc2c3cccc(CCS(=O)(=O)O)c3)[C@@H](O)[C@H](O)[C@@H]1O	440.114	-0.037	-7.4	7	27	4	2	4	7	0.271	0.311	0.361	5830

## Sheet: Methionine Aminopeptidase
ID	SMILES	MW	logP	Affinity score	Number of bonds	numAtoms	numRings	numRotBonds	numHDon	numHAcc	EC	Ecr	Ecrho	Patch Dock score
CHEMBL3913373	Oc1ccc(NC(=O)NNC(=O)C2C(=O)NC(=O)N(C2=O)c3ccccc3)cc1[N+](=O)[O-]	442.087	0.352	-9	11	32	3	4	5	8	0.299	0.311	0.371	5530
CHEMBL1962731	NC(=N)NC(=O)c1nc(Cl)c(NCCS(=O)(=O)Cc2ccccc2)nc1N	411.088	0.362	-8.9	15	27	2	7	5	8	0.282	0.426	0.399	5458
CHEMBL3606098	O[C@H]1C[C@@H](O[C@@H]1COP(=O)(O)C(F)(F)P(=O)(O)O)N2C=C(F)C(=O)NC2=O	440	-0.746	-8.6	10	27	2	6	5	8	0.285	0.408	0.435	4988
CHEMBL1797670	COc1c(O)cc(\C=C\C(=O)C[C@@H]2O[C@H](CO)[C@H](O)[C@H](O)[C@H]2O)cc1[N+](=O)[O-]	399.117	-0.876	-8.4	11	28	2	7	5	10	0.311	0.479	0.524	4680
CHEMBL3800386	CO[C@H]1O[C@H]([C@@H](O)CNS(=O)(=O)c2ccc(C)cc2)[C@@H](O)[C@H](O)[C@@H]1O	377.114	-1.912	-8.1	13	25	2	6	5	8	0.292	0.486	0.519	5366
CHEMBL3142997	O[C@H]1C[C@@H](O[C@@H]1COP(=O)(O)CC(=O)O)N2C=C(C=C)C(=O)NC2=O	376.067	-0.885	-8.1	12	25	2	7	4	8	0.323	0.436	0.536	5564
CHEMBL329917	CC(=O)N[C@@H](CC(=O)O)C(=O)N[C@H]1CCC[C@H]2SC[C@H](N2C1=O)C(=O)N[C@H]3CC(=O)OC3O	486.142	-2.345	-8	17	33	3	7	5	9	0.311	0.471	0.512	4676
ZINC000670449788	Cc1cc(O)nc(CCNC(=O)Cc2c(C)nc(O)nc2O)n1	319.128	-0.098	-8	16	23	2	5	4	8	0.311	0.455	0.514	4660
ZINC000199197855	N[C@@H](Cc1ccccc1)C(=O)OCC(=O)[C@@H](O)[C@H](O)[C@H](O)CO	327.132	-2.256	-8	13	23	1	9	5	8	0.359	0.412	0.542	5460
ZINC000016682972	CCOC(=O)[C@@H](O)[C@H](O)[C@H](O)[C@@H](O)c1nnc2ccccc2n1	323.112	-1.296	-7.9	15	23	2	6	4	9	0.318	0.309	0.492	5750
CHEMBL3797765	CC(C)C[C@H](NC(=O)[C@@H](O)[C@H]1OC(=O)C[C@@H]1N)[C@@H]2Cc3cccc(O)c3C(=O)O2	406.174	0.008	-7.8	11	29	3	6	4	8	0.273	0.406	0.322	4892
ZINC000008624434	CNCc1cn(C[C@H]2O[C@@H](CC(=O)NC(C)C)[C@H](O)[C@@H]2O)nn1	327.191	-1.599	-7.8	11	23	2	7	4	8	0.329	0.446	0.447	5128
ZINC000024984113	CC(C)(C)[C@@H](NC(=O)OCc1ccccc1)C(=O)OC[C@H]1O[C@@H](O)[C@@H](O)[C@@H](O)[C@@H]1O	427.184	-0.329	-7.7	11	30	2	6	5	9	0.271	0.377	0.402	5678
CHEMBL608058	CC(=O)C1=CN(C2O[C@H](COP(=O)(O)CC(=O)O)[C@@H](O)[C@@H]2O)C(=O)NC1=O	408.057	-2.355	-7.7	15	27	2	7	5	10	0.273	0.401	0.368	4622
CHEMBL1085771	CSc1ccc(Cc2cc(ccc2Cl)[C@@H]3O[C@H](CO)[C@@H](O)[C@H](O)[C@H]3O)nn1	412.086	0.958	-7.7	9	27	3	5	4	8	0.331	0.441	0.516	5058
CHEMBL3221802	O[C@@H]1C[C@@](O)(C=C([C@H]1O)c2cn(nn2)c3ccccc3O)C(=O)O	333.096	-0.703	-7.6	11	24	3	3	5	8	0.348	0.462	0.609	4372
CHEMBL178393	CC1=C(SC2CCCCC2)N(COCNC(=O)CNCP(=O)(O)O)C(=O)NC1=O	450.134	0.042	-7.6	9	29	2	10	5	8	0.291	0.422	0.371	5634
CHEMBL2028483	[Na+].OC(C(O)C(O)c1nc2ccccc2s1)C(O)C(=O)[O-]	321.028	-4.834	-7.6	10	21	2	5	4	8	0.272	0.406	0.394	4132
CHEMBL420921	Nc1ncnc2c1ncn2OCC(CO)CCP(=O)(O)O	317.089	-0.987	-7.5	17	21	2	7	4	8	0.327	0.434	0.479	4364
CHEMBL556631	COc1ccc(cc1)c2oc(nn2)[C@@H]3O[C@H](CO)[C@@H](O)[C@H](O)[C@H]3O	338.111	-0.74	-7.5	10	24	3	4	4	9	0.298	0.599	0.555	4698
ZINC000220973999	C/C(=N\NC1=NCCN1)c1cccc(/C(C)=N/NC2=NCCN2)n1	327.192	-0.373	-7.5	11	24	3	4	4	9	0.292	0.347	0.442	4932
