# Supplementary material for: Identification of Potential Druggable Targets and Structure-Based Virtual Screening for Drug-like Molecules against the Shrimp Pathogen Enterocytozoon hepatopenaei
Source: Int J Mol Sci. 2023 Jan 11;24(2):1412. doi: 10.3390/ijms24021412 (PMC9867128; doi:10.3390/ijms24021412)
Supplement: Supplementary file 1 [file ijms-24-01412-s001.zip › Table S4.xlsx]

## Sheet: Aquaporin
Table S4. ADMET properties of the five best compounds selected against the protein targets
Compound ID	CHEMBL3703838	ZINC000002243083	CHEMBL133039	CHEMBL3140193	CHEMBL2132563
Physicochemical Property
Molecular Weight	470.08	383.93	360.11	462.96	409.07
Volume	425.769	294.65	352.89	363.295	360.215
Density	1.104	1.303	1.02	1.274	1.136
nHA	8	10	8	10	9
nHD	4	4	4	5	4
TPSA	133.52	183.34	143.13	166.11	141.96
nRot	4	3	8	6	4
nRing	4	2	2	2	4
MaxRing	10	10	6	6	6
nHet	10	13	8	14	11
fChar	0	0	-1	0	0
nRig	25	17	14	15	22
Flexibility	0.16	0.176	0.571	0.4	0.182
Stereo Centers	5	0	0	5	5
LogS	-3.179	0.775	-3.012	-0.574	-3.133
LogD	0.839	-0.58	-0.206	0.196	1.586
LogP	1.369	-2.691	0.861	0.147	1.519
Absorption
Pgp-inh	0.019	0	0.006	0.414	0.034
Pgp-sub	0.827	0.018	0.015	0.001	0.091
HIA	0.145	0.948	0.704	0.843	0.01
F(20%)	0.006	1	0.955	0.02	0.003
F(30%)	0.941	0.997	0.968	0.981	0.454
Caco-2 Permeability	-6.283	-6.506	-6.209	-5.391	-5.1
MDCK Permeability	5.47643e-06	0.000112427	7.31742e-06	9.79099e-06	9.29407e-06
Distribution
BBB Penetration	0.032	0.009	0.027	0.038	0.134
PPB	0.934693	0.565202	0.962299	0.988115	0.958607
Volume Distribution(l/kg)	0.742	0.35	0.371	1.634	1.027
Fu	0.0407569	0.244981	0.0288961	0.0221628	0.0587541
Metabolism
CYP1A2-inhibitor	0.111	0.007	0.573	0.065	0.595
CYP1A2-substrate	0.067	0.063	0.384	0.067	0.045
CYP2C19-inhibitor	0.105	0.036	0.091	0.04	0.25
CYP2C19-substrate	0.582	0.041	0.055	0.057	0.058
CYP2C9-inhibitor	0.043	0.008	0.556	0.003	0.139
CYP2C9-substrate	0.835	0.879	0.52	0.2	0.209
CYP2D6-inhibitor	0.025	0.002	0.349	0.017	0.003
CYP2D6-substrate	0.246	0.134	0.184	0.098	0.163
CYP3A4-inhibitor	0.131	0.004	0.419	0.004	0.007
CYP3A4-substrate	0.562	0.001	0.078	0.012	0.095
Excretion
CL	2.737	0.816	2.524	1.328	1.681
T1/2	0.204	0.117	0.912	0.319	0.138
Toxicity
hERG Blockers	0.079	0.144	0.037	0.004	0.036
H-HT	0.579	0.007	0.894	0.761	0.614
DILI	0.977	0.015	0.967	0.967	0.983
Ames Toxicity	0.078	0.022	0.63	0.01	0.104
Rat Oral Acute Toxicity	0.313	0	0.073	0.154	0.086
FDAMDD	0.038	0.476	0.254	0.054	0.022
Skin Sensitization	0.022	0.121	0.593	0.193	0.032
Carcinogenicity	0.545	0.007	0.466	0.065	0.312
Eye Corrosion	0.003	1	0.004	0.004	0.003
Eye Irritation	0.022	0.61	0.374	0.068	0.016
Respiratory Toxicity	0.003	0.645	0.14	0.829	0.932
Environmental Toxicity
Bioconcentration Factors	0.63	0.001	0.588	0.678	1.127
IGC50	4.075	3.404	4.484	3.986	3.069
LC50FM	4.761	4.12	4.601	4.537	3.771
LC50DM	4.833	3.299	5.069	5.144	4.999
Tox21 Pathway
NR-AR	0.681	0	0.023	0.005	0.422
NR-AR-LBD	0.258	0	0.248	0.02	0.05
NR-AhR	0.105	0.08	0.763	0.032	0.5
NR-Aromatase	0.796	0.002	0.014	0.008	0.156
NR-ER	0.231	0.666	0.775	0.225	0.313
NR-ER-LBD	0.061	0.843	0.178	0.023	0.006
NR-PPAR-gamma	0.433	0.001	0.885	0.004	0.444
SR-ARE	0.244	0.066	0.109	0.085	0.789
SR-ATAD5	0.016	0.004	0.011	0.006	0.569
SR-HSE	0.013	0	0.25	0.003	0.021
SR-MMP	0.153	0.018	0.163	0.006	0.352
SR-p53	0.52	0.006	0.228	0.009	0.896
Toxicophore Rules
Toxicophores	0	2	2	1	1
Acute_Aquatic_Toxicity	1	0	0	1	1
LD50_oral	0	0	0	0	0
NonGenotoxic_Carcinogenicity	1	0	0	0	1
Skin_Sensitization	0	0	8	0	0
SureChEMBL	0	2	1	1	0
Genotoxic_Carcinogenicity_Mutagenicity	0	1	0	0	0
NonBiodegradable	2	1	1	2	2
Medicinal Chemistry
QED	0.511	0.536	0.513	0.173	0.485
Synth	4.09	2.667	3.036	4.36	3.803
Fsp3	0.429	0	0.222	0.462	0.353
MCE-18	90.133	21	15	63.474	79
Natural Product-likeness	0.441	-0.112	0.307	0.539	-0.303
Alarm_NMR	1	3	2	3	1
BMS	0	1	0	0	0
Chelating	0	0	1	0	0
PAINS	0	0	0	0	0
Lipinski	Accepted	Accepted	Accepted	Accepted	Accepted
Pfizer	Accepted	Accepted	Accepted	Accepted	Accepted
GSK	Rejected	Accepted	Accepted	Rejected	Rejected
GoldenTriangle	Accepted	Accepted	Accepted	Accepted	Accepted

## Sheet: CTP Synthase
Compound ID	CHEMBL48494	CHEMBL1162979	CHEMBL133039	CHEMBL1091856	CHEMBL1091856
Physicochemical Property
Molecular Weight	385.12	467.1	360.11	472.01	472.01
Volume	371.687	432.741	352.89	379.959	379.959
Density	1.036	1.079	1.02	1.242	1.242
nHA	8	10	8	13	13
nHD	5	5	4	3	3
TPSA	139.31	176.81	143.13	211.26	211.26
nRot	3	7	8	10	10
nRing	4	3	2	2	2
MaxRing	14	6	6	6	6
nHet	8	11	8	16	16
fChar	0	-1	-1	0	0
nRig	24	21	14	17	17
Flexibility	0.125	0.333	0.571	0.588	0.588
Stereo Centers	5	5	0	0
LogS	-3.397	-1.337	-3.012	-1.15	-1.15
LogD	1.062	-0.383	-0.206	-0.407	-0.407
LogP	0.828	0.915	0.861	0.474	0.474
Absorption
Pgp-inh	0.95	0.003	0.006	0.026	0.026
Pgp-sub	0.657	0.061	0.015	0	0
HIA	0.627	0.23	0.704	0.824	0.824
F(20%)	0.022	0.997	0.955	0.943	0.943
F(30%)	0.999	0.993	0.968	0.995	0.995
Caco-2 Permeability	-5.274	-5.764	-6.209	-6.819	-6.819
MDCK Permeability	7.53819e-06	4.20173e-06	7.31742e-06	1.29868e-05	1.29868e-05
Distribution
BBB Penetration	0.598	0.014	0.027	0.966	0.966
PPB	0.847877	0.970286	0.962299	0.512085	0.512085
Volume Distribution(l/kg)	0.975	0.493	0.371	0.341	0.341
Fu	0.234148	0.0274208	0.0288961	0.347025	0.347025
Metabolism
CYP1A2-inhibitor	0.077	0.123	0.573	0.006	0.006
CYP1A2-substrate	0.048	0.033	0.384	0.054	0.054
CYP2C19-inhibitor	0.105	0.041	0.091	0.021	0.021
CYP2C19-substrate	0.059	0.057	0.055	0.043	0.043
CYP2C9-inhibitor	0.125	0.021	0.556	0.052	0.052
CYP2C9-substrate	0.072	0.723	0.52	0.983	0.983
CYP2D6-inhibitor	0.04	0.007	0.349	0.005	0.005
CYP2D6-substrate	0.181	0.537	0.184	0.059	0.059
CYP3A4-inhibitor	0.054	0.03	0.419	0.011	0.011
CYP3A4-substrate	0.209	0.026	0.078	0.02	0.02
Excretion
CL	0.915	5.598	2.524	1.057	1.057
T1/2	0.213	0.684	0.912	0.186	0.186
Toxicity
hERG Blockers	0.346	0.437	0.037	0.04	0.04
H-HT	0.148	0.898	0.894	0.703	0.703
DILI	0.737	0.211	0.967	0.997	0.997
Ames Toxicity	0.857	0.274	0.63	0.004	0.004
Rat Oral Acute Toxicity	0.078	0.289	0.073	0.004	0.004
FDAMDD	0.056	0.932	0.254	0.985	0.985
Skin Sensitization	0.034	0.935	0.593	0.798	0.798
Carcinogenicity	0.534	0.534	0.466	0.419	0.419
Eye Corrosion	0.003	0.003	0.004	0.003	0.003
Eye Irritation	0.012	0.145	0.374	0.041	0.041
Respiratory Toxicity	0.018	0.972	0.14	0.698	0.698
Environmental Toxicity
Bioconcentration Factors	1.255	0.586	0.588	0.927	0.927
IGC50	4.868	3.725	4.484	2.716	2.716
LC50FM	5.582	4.789	4.601	3.773	3.773
LC50DM	6.792	3.852	5.069	4.809	4.809
Tox21 Pathway
NR-AR	0.022	0.006	0.023	0.002	0.002
NR-AR-LBD	0.036	0.016	0.248	0	0
NR-AhR	0.616	0.335	0.763	0.001	0.001
NR-Aromatase	0.538	0.03	0.014	0	0
NR-ER	0.41	0.43	0.775	0.019	0.019
NR-ER-LBD	0.037	0.009	0.178	0.003	0.003
NR-PPAR-gamma	0.005	0.035	0.885	0	0
SR-ARE	0.212	0.229	0.109	0.001	0.001
SR-ATAD5	0.014	0.01	0.011	0.001	0.001
SR-HSE	0.003	0.012	0.25	0	0
SR-MMP	0.59	0.422	0.163	0.001	0.001
SR-p53	0.317	0.33	0.228	0	0
Toxicophore Rules
Toxicophores	1	1	2	1	1
Acute_Aquatic_Toxicity	2	0	0	0	0
LD50_oral	0	0	0	0	0
NonGenotoxic_Carcinogenicity	1	0	0	0	0
Skin_Sensitization	4	2	8	0	0
SureChEMBL	0	1	1	2	2
Genotoxic_Carcinogenicity_Mutagenicity	1	0	0	0	0
NonBiodegradable	1	1	1	0	0
Medicinal Chemistry
QED	0.482	0.214	0.513	0.323	0.323
Synth	3.701	4.259	3.036	4.09	4.09
Fsp3	0.3	0.333	0.222	0.385	0.385
MCE-18	81.231	73.857	15	21	21
Natural Product-likeness	0.995	1.331	0.307	-0.846	-0.846
Alarm_NMR	1	2	2	2	2
BMS	0	0	0	1	1
Chelating	0	0	1	0	0
PAINS	1	0	0	0	0
Lipinski	Accepted	Accepted	Accepted	Accepted	Accepted
Pfizer	Accepted	Accepted	Accepted	Accepted	Accepted
GSK	Accepted	Rejected	Accepted	Rejected	Rejected
GoldenTriangle	Accepted	Accepted	Accepted	Accepted	Accepted

## Sheet: Thymidine Kinase
TableS4. ADMET property of five best selected compounds against different protein tergats
Compound ID	CHEMBL3674540	CHEMBL1683320	CHEMBL391279	ZINC000031750813	CHEMBL4078273
Physicochemical Property
Molecular Weight	362.14	375.06	305.12	220.07	420.15
Volume	340.823	314.969	272.048	168.213	392.483
Density	1.063	1.191	1.122	1.308	1.07
nHA	11	10	10	12	9
nHD	5	3	5	4	4
TPSA	160.38	144	140.94	157.7	142.75
nRot	6	5	3	2	10
nRing	4	3	4	3	2
MaxRing	10	6	9	6	6
nHet	11	12	10	12	10
fChar	0	0	0	0	0
nRig	23	18	20	16	14
Flexibility	0.261	0.278	0.15	0.125	0.714
Stereo Centers	0	4	4	0	5
LogS	-3.606	-1.34	-2.156	-2.907	-1.379
LogD	0.456	-0.447	-0.558	-0.009	0.6
LogP	0.263	-0.503	-1.967	0.869	0.343
Absorption
Pgp-inh	0.003	0.007	0	0.001	0.003
Pgp-sub	0.984	0.014	0.983	1	0.013
HIA	0.007	0.088	0.298	0.64	0.869
F(20%)	0.001	0.04	0.987	0.03	0.371
F(30%)	0.011	0.933	0.987	0.867	0.889
Caco-2 Permeability	-5.398	-5.889	-5.977	-6.207	-5.455
MDCK Permeability	5.21621e-06	8.72527e-06	3.01723e-06	6.70787e-06	2.36983e-05
Distribution
BBB Penetration	0.735	0.211	0.536	0.049	0.029
PPB	0.533566	0.826689	0.184372	0.412321	0.96818
Volume Distribution(l/kg)	1.406	0.658	0.684	0.448	1.347
Fu	0.501491	0.185127	0.809089	0.140238	0.0117109
Metabolism
CYP1A2-inhibitor	0.439	0.031	0.01	0.005	0.052
CYP1A2-substrate	0.253	0.047	0.159	0.125	0.111
CYP2C19-inhibitor	0.08	0.112	0.078	0.015	0.036
CYP2C19-substrate	0.058	0.049	0.06	0.037	0.662
CYP2C9-inhibitor	0.042	0.005	0.011	0.006	0.04
CYP2C9-substrate	0.434	0.099	0.043	0.806	0.895
CYP2D6-inhibitor	0.139	0.023	0.01	0.001	0.009
CYP2D6-substrate	0.334	0.114	0.09	0.01	0.289
CYP3A4-inhibitor	0.03	0.004	0.012	0.001	0.007
CYP3A4-substrate	0.112	0.039	0.075	0.022	0.012
Excretion
CL	8.612	1.804	3.691	2.195	1.765
T1/2	0.394	0.86	0.869	0.893	0.175
Toxicity
hERG Blockers	0.023	0.029	0.027	0.021	0.332
H-HT	0.93	0.221	0.877	0.612	0.503
DILI	0.996	0.978	0.958	0.982	0.029
Ames Toxicity	0.41	0.073	0.83	0.665	0.109
Rat Oral Acute Toxicity	0.068	0.203	0.237	0.238	0.34
FDAMDD	0.921	0.93	0.341	0.077	0.383
Skin Sensitization	0.131	0.175	0.207	0.053	0.929
Carcinogenicity	0.862	0.23	0.1	0.017	0.606
Eye Corrosion	0.003	0.003	0.003	0.003	0.301
Eye Irritation	0.009	0.032	0.008	0.974	0.743
Respiratory Toxicity	0.819	0.767	0.869	0.988	0.971
Environmental Toxicity
Bioconcentration Factors	-0.009	0.441	-0.252	0.056	0.777
IGC50	1.837	3.034	2.62	1.601	4.623
LC50FM	2.534	3.678	2.552	4.139	5.559
LC50DM	3.541	5.131	3.624	4.218	5.735
Tox21 Pathway
NR-AR	0.001	0.034	0.002	0	0.005
NR-AR-LBD	0.002	0.004	0.002	0.001	0.01
NR-AhR	0.14	0.012	0.045	0.022	0.308
NR-Aromatase	0.005	0.002	0.357	0.011	0.019
NR-ER	0.195	0.053	0.104	0.094	0.417
NR-ER-LBD	0.006	0.017	0.006	0.009	0.399
NR-PPAR-gamma	0.029	0.003	0.006	0.5	0.011
SR-ARE	0.568	0.058	0.487	0.051	0.124
SR-ATAD5	0.057	0.008	0.028	0.002	0.017
SR-HSE	0.006	0.002	0.013	0.002	0.005
SR-MMP	0.312	0.013	0.044	0.054	0.046
SR-p53	0.096	0.005	0.685	0.003	0.08
Toxicophore Rules
Toxicophores	3	0	2	0	0
Acute_Aquatic_Toxicity	1	1	0	0	1
LD50_oral	0	0	0	0	0
NonGenotoxic_Carcinogenicity	2	1	0	0	0
Skin_Sensitization	0	0	0	0	1
SureChEMBL	0	0	0	0	1
Genotoxic_Carcinogenicity_Mutagenicity	4	0	0	0	0
NonBiodegradable	1	2	1	0	1
Medicinal Chemistry
QED	0.232	0.614	0.418	0.415	0.319
Synth	3.006	4.45	5.708	3.87	3.561
Fsp3	0.062	0.385	0.5	0	0.667
MCE-18	21	68.889	81.778	26	53.333
Natural Product-likeness	-1.72	-0.341	0.558	-1.142	1.48
Alarm_NMR	0	0	0	0	2
BMS	0	0	0	0	0
Chelating	0	0	0	0	0
PAINS	0	0	0	0	0
Lipinski	Accepted	Accepted	Accepted	Accepted	Accepted
Pfizer	Accepted	Accepted	Accepted	Accepted	Accepted
GSK	Accepted	Accepted	Accepted	Accepted	Rejected
GoldenTriangle	Accepted	Accepted	Accepted	Accepted	Accepted

## Sheet: Dihydrofolate reductase
Compound ID	CHEMBL1966988	ZINC000016682862	ZINC000828645375	CHEMBL3901573	CHEMBL340488
Physicochemical Property
Molecular Weight	311.07	449.08	397.1	331.08	443.08
Volume	274.534	412.36	367.963	292.69	392.64
Density	1.133	1.089	1.079	1.131	1.128
nHA	9	10	9	9	10
nHD	7	7	5	5	5
TPSA	153.47	169.4	154.21	151.84	161.07
nRot	6	12	8	6	8
nRing	2	2	2	2	3
MaxRing	6	6	6	6	6
nHet	10	12	10	10	12
fChar	0	0	0	0	0
nRig	14	16	12	14	19
Flexibility	0.429	0.75	0.667	0.429	0.421
Stereo Centers	0	0	4	4	5
LogS	-3.1	-3.808	-3.297	-1.055	-1.776
LogD	-0.012	0.939	1.911	-0.48	-0.194
LogP	-0.071	0.826	1.413	-0.967	0.411
Absorption
Pgp-inh	0	0.854	0.031	0	0.001
Pgp-sub	0.931	0.971	0.084	0.282	0.522
HIA	0.02	0.062	0.039	0.036	0.027
F(20%)	0.065	0.042	0.003	0.006	0.072
F(30%)	0.112	0.735	0.547	0.177	0.212
Caco-2 Permeability	-6.524	-6.504	-5.359	-5.614	-5.683
MDCK Permeability	8.5263e-06	9.66587e-06	1.24492e-05	5.25212e-06	1.06759e-05
Distribution
BBB Penetration	0.01	0.33	0.505	0.373	0.011
PPB	0.853826	0.907101	0.950251	0.249435	0.724388
Volume Distribution(l/kg)	0.236	0.646	0.986	0.418	0.456
Fu	0.227503	0.12236	0.0331652	0.72324	0.376496
Metabolism
CYP1A2-inhibitor	0.005	0.916	0.315	0.004	0.055
CYP1A2-substrate	0.131	0.068	0.06	0.054	0.045
CYP2C19-inhibitor	0.028	0.533	0.1	0.014	0.021
CYP2C19-substrate	0.065	0.05	0.063	0.06	0.253
CYP2C9-inhibitor	0.15	0.838	0.039	0.006	0.009
CYP2C9-substrate	0.792	0.556	0.145	0.074	0.041
CYP2D6-inhibitor	0.091	0.267	0.025	0.002	0.009
CYP2D6-substrate	0.213	0.175	0.244	0.068	0.08
CYP3A4-inhibitor	0.075	0.746	0.01	0.006	0.011
CYP3A4-substrate	0.145	0.068	0.074	0.072	0.439
Excretion
CL	0.932	7.267	7.696	3.127	1.342
T1/2	0.396	0.394	0.812	0.417	0.193
Toxicity
hERG Blockers	0.023	0.28	0.057	0.112	0.05
H-HT	0.798	0.241	0.805	0.975	0.683
DILI	0.988	0.986	0.958	0.994	0.989
Ames Toxicity	0.2	0.138	0.026	0.098	0.106
Rat Oral Acute Toxicity	0.056	0.047	0.073	0.021	0.211
FDAMDD	0.046	0.003	0.013	0.718	0.043
Skin Sensitization	0.342	0.625	0.055	0.238	0.172
Carcinogenicity	0.856	0.474	0.262	0.164	0.035
Eye Corrosion	0.003	0.003	0.003	0.003	0.003
Eye Irritation	0.009	0.029	0.012	0.108	0.007
Respiratory Toxicity	0.074	0.756	0.379	0.745	0.881
Environmental Toxicity
Bioconcentration Factors	-0.145	0.349	0.169	0.483	0.468
IGC50	3.13	3.542	1.693	2.145	3.151
LC50FM	3.483	4.651	2.072	2.657	5.658
LC50DM	3.773	4.813	3.381	3.646	4.352
Tox21 Pathway
NR-AR	0.011	0.003	0.024	0.767	0.011
NR-AR-LBD	0.001	0.003	0.538	0.273	0.018
NR-AhR	0.057	0.691	0.277	0.017	0.011
NR-Aromatase	0.002	0.011	0.881	0.012	0.01
NR-ER	0.186	0.113	0.773	0.191	0.095
NR-ER-LBD	0.008	0.01	0.008	0.008	0.008
NR-PPAR-gamma	0.003	0.585	0.953	0.013	0.237
SR-ARE	0.242	0.57	0.521	0.129	0.153
SR-ATAD5	0.005	0.009	0.307	0.009	0.011
SR-HSE	0.005	0.121	0.003	0.008	0.005
SR-MMP	0.258	0.267	0.308	0.028	0.1
SR-p53	0.002	0.301	0.8	0.006	0.136
Toxicophore Rules
Toxicophores	1	4	1	0	1
Acute_Aquatic_Toxicity	0	0	1	0	1
LD50_oral	0	0	0	0	0
NonGenotoxic_Carcinogenicity	0	1	1	0	0
Skin_Sensitization	1	4	0	0	0
SureChEMBL	0	2	0	1	1
Genotoxic_Carcinogenicity_Mutagenicity	1	1	1	0	0
NonBiodegradable	1	0	2	1	1
Medicinal Chemistry
QED	0.268	0.226	0.405	0.494	0.45
Synth	2.964	2.715	3.945	3.708	3.985
Fsp3	0	0.167	0.412	0.5	0.412
MCE-18	14	16	32	53.333	70
Natural Product-likeness	-0.792	-1.27	-0.673	-0.079	0.122
Alarm_NMR	2	4	0	1	2
BMS	1	0	0	0	0
Chelating	0	0	0	0	0
PAINS	0	0	0	0	0
Lipinski	Accepted	Accepted	Accepted	Accepted	Accepted
Pfizer	Accepted	Accepted	Accepted	Accepted	Accepted
GSK	Accepted	Rejected	Accepted	Accepted	Rejected
GoldenTriangle	Accepted	Accepted	Accepted	Accepted	Accepted

## Sheet: Methionine Aminopeptidase 2
Compound ID	CHEMBL1962731	CHEMBL3142997	ZINC000199197855	ZINC000016682972	CHEMBL3913373
Physicochemical Property
Molecular Weight	411.09	376.07	327.13	323.11	442.09
Volume	366.86	324.042	318.786	303.5	398.88
Density	1.121	1.161	1.026	1.065	1.108
nHA	10	11	8	9	14
nHD	7	3	6	4	208.69
TPSA	180.17	164.99	150.31	145.89	6
nRot	8	7	10	7	8
nRing	2	2	1	2	3
MaxRing	6	6	6	10	6
nHet	12	12	8	9	14
fChar	0	0	0	0	0
nRig	17	17	8	12	23
Flexibility	0.471	0.412	1.25	0.583	0.348
Stereo Centers	0	3	4	4	0
LogS	-2.62	-0.823	-1.223	-1.195	-4.169
LogD	0.164	-0.885	-1.714	-0.045	0.64
LogP	0.221	-1.85	-0.721	-0.495	1.19
Absorption
Pgp-inh	0.004	0	0.001	0.001	0.001
Pgp-sub	0.995	0.008	0.407	0.041	0.942
HIA	0.01	0.623	0.397	0.014	0.584
F(20%)	0.033	0.799	0.01	0.008	0.003
F(30%)	0.272	0.987	0.039	0.267	0.004
Caco-2 Permeability	-5.998	-6.088	-5.33	-5.779	-6.27
MDCK Permeability	9.25488e-06	4.89834e-05	0.00308563	5.83919e-05	1.93849e-05
Distribution
BBB Penetration	0.726	0.504	0.46	0.768	0.005
PPB	0.435447	0.186658	0.114054	0.534721	0.887318
Volume Distribution(l/kg)	1.432	0.205	0.643	1.894	0.258
Fu	0.591103	0.761478	0.826652	0.494478	0.12088
Metabolism
CYP1A2-inhibitor	0.048	0.002	0.025	0.076	0.011
CYP1A2-substrate	0.182	0.041	0.02	0.07	0.049
CYP2C19-inhibitor	0.09	0.031	0.014	0.024	0.056
CYP2C19-substrate	0.059	0.031	0.058	0.139	0.043
CYP2C9-inhibitor	0.02	0.002	0.001	0.001	0.131
CYP2C9-substrate	0.04	0.853	0.071	0.621	0.769
CYP2D6-inhibitor	0.137	0.036	0.005	0.003	0.005
CYP2D6-substrate	0.139	0.072	0.137	0.165	0.097
CYP3A4-inhibitor	0.121	0.005	0.008	0.003	0.039
CYP3A4-substrate	0.764	0.008	0.085	0.048	0.056
Excretion
CL	6.735	2.185	2.638	1.629	1.389
T1/2	0.641	0.877	0.886	0.369	0.895
Toxicity
hERG Blockers	0.202	0.004	0.209	0.096	0.002
H-HT	0.852	0.907	0.083	0.022	0.692
DILI	0.988	0.982	0.081	0.579	0.991
Ames Toxicity	0.026	0.086	0.108	0.025	0.705
Rat Oral Acute Toxicity	0.298	0.004	0.025	0.006	0.03
FDAMDD	0.871	0.962	0.005	0.003	0.018
Skin Sensitization	0.06	0.405	0.069	0.03	0.699
Carcinogenicity	0.035	0.145	0.024	0.017	0.12
Eye Corrosion	0.003	0.003	0.003	0.003	0.003
Eye Irritation	0.01	0.024	0.008	0.013	0.019
Respiratory Toxicity	0.925	0.071	0.039	0.041	0.194
Environmental Toxicity
Bioconcentration Factors	-0.205	0.139	0.26	0.359	0.292
IGC50	1.987	2.422	1.604	1.916	3.615
LC50FM	2.725	3.832	2.1	2.519	4.171
LC50DM	4.951	3.431	3.118	4.463	4.593
Tox21 Pathway
NR-AR	0.007	0.033	0.442	0.405	0.001
NR-AR-LBD	0.001	0.017	0.144	0.289	0.002
NR-AhR	0.042	0.003	0.01	0.011	0.319
NR-Aromatase	0.008	0.002	0.007	0.014	0.004
NR-ER	0.068	0.056	0.127	0.106	0.229
NR-ER-LBD	0.043	0.011	0.008	0.038	0.008
NR-PPAR-gamma	0.028	0.019	0.004	0.007	0.004
SR-ARE	0.843	0.196	0.066	0.091	0.337
SR-ATAD5	0.025	0.007	0.04	0.061	0.047
SR-HSE	0.012	0.002	0.005	0.009	0.024
SR-MMP	0.106	0.012	0.01	0.02	0.63
SR-p53	0.638	0.009	0.005	0.018	0.205
Toxicophore Rules
Toxicophores	2	1	1	1	5
Acute_Aquatic_Toxicity	1	0	0	0	1
LD50_oral	0	0	0	0	0
NonGenotoxic_Carcinogenicity	0	0	0	0	1
Skin_Sensitization	3	2	2	0	5
SureChEMBL	1	1	0	0	0
Genotoxic_Carcinogenicity_Mutagenicity	1	0	0	0	1
NonBiodegradable	1	1	1	1	2
Medicinal Chemistry
QED	0.323	0.521	0.319	0.476	0.188
Synth	3.427	4.84	3.412	3.754	2.65
Fsp3	0.2	0.462	0.467	0.429	0
MCE-18	16	58.158	20	28	21
Natural Product-likeness	-0.865	0.641	0.745	-0.018	-1.658
Alarm_NMR	2	0	0	0	4
BMS	0	0	0	0	0
Chelating	0	0	0	0	0
PAINS	0	0	0	0	0
Lipinski	Accepted	Accepted	Accepted	Accepted	Accepted
Pfizer	Accepted	Accepted	Accepted	Accepted	Accepted
GSK	Rejected	Accepted	Accepted	Accepted	Rejected
GoldenTriangle	Accepted	Accepted	Accepted	Accepted	Accepted
