# Supplementary material for: Identification of Potential Druggable Targets and Structure-Based Virtual Screening for Drug-like Molecules against the Shrimp Pathogen Enterocytozoon hepatopenaei
Source: Int J Mol Sci. 2023 Jan 11;24(2):1412. doi: 10.3390/ijms24021412 (PMC9867128; doi:10.3390/ijms24021412)
Supplement: Supplementary file 1 [file ijms-24-01412-s001.zip › Table S5.xlsx]

## Sheet: Aquaporin
	Table S5. RMSD values of the protein–ligand complexes and proteins following 100 ns MD simulations
	CHEMBL3703838	ZINC000002243083	CHEMBL133039	CHEMBL3140193	CHEMBL2132563	Aquqporin
0	0	6.48786e-07	4.2473e-07	0	8.92607e-07	6.25186e-07
1	1.09973	0.892217	0.891422	0.959293	0.862669	0.9693
2	1.12969	1.16165	1.12747	1.00851	0.969662	0.983371
3	1.42674	1.12234	1.04171	0.899659	0.888868	1.04987
4	1.42723	1.1997	1.02568	1.13086	1.22165	1.11375
5	1.53522	1.1782	1.1842	1.23083	1.20965	0.974238
6	1.38126	1.22408	1.23245	1.1679	1.20742	1.07395
7	0.972648	1.11143	1.2114	1.21067	1.35483	1.02318
8	1.03869	1.08834	1.27788	1.39269	1.25937	0.832281
9	1.16709	1.26649	1.2325	1.46835	1.54913	1.04177
10	1.42386	1.35911	1.18664	1.36725	1.73377	1.07224
11	1.63121	1.43585	1.57224	1.52207	1.61535	1.506
12	1.39819	1.30711	1.62018	1.59258	1.7427	1.2532
13	1.38985	1.33604	1.3684	1.51637	1.85373	1.21217
14	1.31305	1.35394	1.91452	1.05076	2.03844	1.35522
15	1.21638	1.32934	1.87638	1.48073	2.09769	1.51154
16	1.18883	1.33005	2.51018	1.24651	2.05827	1.66795
17	1.23021	1.38041	2.79533	1.34962	2.13404	1.39463
18	1.52118	1.57146	2.9408	1.3788	1.87239	1.28115
19	1.67014	1.36959	2.84202	1.36267	1.6264	1.54512
20	1.37766	1.3985	3.01103	1.24369	1.76567	1.64043
21	1.41443	1.41582	3.30866	1.41508	1.33461	1.48709
22	1.22864	1.60508	3.32891	1.65021	1.55036	1.56536
23	1.20609	1.43549	3.18332	1.39651	1.58074	1.44961
24	1.64721	1.49927	3.11122	1.59844	1.50802	1.67286
25	1.48361	1.37927	3.1415	1.86981	1.48591	1.78323
26	1.43853	1.59784	2.72319	1.75409	1.50037	1.52973
27	1.25621	1.5467	2.71442	1.92671	1.55074	1.73957
28	1.33677	1.41714	2.94488	1.79336	1.74373	1.90188
29	1.54273	1.39167	3.26276	1.74282	1.83325	1.62677
30	1.67749	1.45037	3.21092	1.71976	1.9838	1.88413
31	1.59806	1.31849	3.09026	1.5371	1.7348	1.87228
32	1.54037	1.4882	3.07133	1.72547	1.63066	1.96654
33	1.67125	1.72826	3.14203	1.60915	1.56827	1.79415
34	1.7085	1.58351	3.52662	1.89243	1.69342	1.66448
35	1.41587	1.61009	2.71226	1.7986	1.78872	1.44525
36	1.48218	1.7119	2.5267	1.55857	1.8333	1.50588
37	1.33177	1.55926	2.59253	1.56642	1.97501	1.31327
38	1.23429	1.65882	2.36286	1.62501	2.09766	1.36443
39	1.34661	1.78606	2.67872	1.68702	2.00836	1.42013
40	1.3319	1.79178	2.64731	1.57643	2.13586	1.56338
41	1.92361	2.10989	3.08672	1.57629	2.29328	1.53413
42	1.64805	1.8031	2.75548	1.60771	1.88689	1.61067
43	1.71328	1.65533	2.71356	1.68147	2.01112	1.63187
44	1.77119	1.60205	2.4603	1.63206	2.1273	1.80859
45	1.68088	1.53605	2.78933	1.45949	1.87671	1.63596
46	1.82035	1.48522	2.82004	1.53703	2.06102	1.55814
47	1.92693	1.42162	2.86708	1.65102	1.8055	1.65548
48	1.90381	1.49457	2.94178	1.44872	1.90771	1.56733
49	1.67747	1.62801	3.04632	1.54031	1.78463	1.65042
50	2.20502	1.59195	3.48031	1.56708	2.14426	1.93341
51	2.46094	1.43717	3.19079	1.64527	2.02629	1.75606
52	2.30769	1.47434	3.02428	1.59342	1.80197	1.69621
53	2.3408	1.44418	3.30681	1.66124	1.80307	1.7543
54	2.08878	1.54418	3.38067	1.67739	1.92855	1.7283
55	2.30376	1.85054	3.65884	1.74337	1.79197	2.03468
56	2.46065	1.64171	3.47374	1.7384	1.94847	2.11756
57	2.48352	1.61047	3.46003	1.59216	1.70399	1.92913
58	2.81231	1.41272	3.50424	1.74453	1.90817	1.90486
59	2.5615	1.29102	3.88764	1.70907	1.90562	1.93872
60	2.49196	1.56912	3.5662	1.65129	1.96412	1.82995
61	2.50878	1.50659	3.1187	1.61699	1.73963	1.85695
62	3.04661	1.6443	3.76959	1.74664	1.90105	1.7561
63	2.58013	1.76269	3.56036	1.6212	1.74159	1.93439
64	2.41122	1.65834	3.48549	1.76253	1.64927	1.81495
65	2.14219	1.67663	3.73441	1.77213	1.66352	2.13451
66	1.95113	1.51052	3.60506	1.78243	1.82186	2.12299
67	2.06029	1.47265	3.48764	1.83775	1.74944	1.92741
68	1.82559	1.56961	3.86143	1.86074	1.94927	2.2078
69	1.7536	1.55311	3.99254	1.98261	1.71496	2.08851
70	1.88345	1.48817	4.13274	1.76257	1.72323	2.11344
71	2.11034	1.48692	3.93291	1.82386	1.83829	2.53901
72	2.01668	1.45772	3.22963	1.78658	1.87088	2.73923
73	2.09127	1.57125	3.4684	1.80563	1.8208	2.68871
74	1.8956	1.54176	3.42357	1.92239	1.78921	2.55008
75	2.07665	1.49017	3.63409	1.94305	1.8845	2.8965
76	2.21807	1.37131	3.7837	1.97923	2.0539	2.56873
77	2.10084	1.48409	3.86229	1.68371	1.96999	2.42924
78	2.20898	1.66135	3.82377	1.72684	2.08922	2.39723
79	2.37478	1.40974	3.49881	2.00973	2.15362	2.38144
80	2.54815	1.57608	3.48676	1.96542	2.18993	2.1887
81	2.59172	1.51565	3.00419	1.89498	1.96743	2.14344
82	2.30328	1.60306	3.14694	2.04644	1.98411	2.29236
83	2.31001	1.44967	2.84131	2.0161	2.1121	2.46622
84	2.3064	1.5537	2.93343	2.08821	2.33391	2.28281
85	2.32595	1.56694	2.96087	2.09569	2.13233	2.37569
86	2.20413	1.64216	3.18501	1.62755	2.16114	2.52301
87	2.2955	1.75536	3.58801	1.82428	2.11155	2.4726
88	2.27105	1.66538	3.60736	1.8405	2.15732	2.4978
89	2.22118	1.59236	3.89645	1.89724	2.00592	2.61521
90	2.09642	1.50767	3.75033	1.72835	2.07285	2.30039
91	2.34054	1.37322	3.69931	1.78245	2.02347	2.38228
92	2.66074	1.43264	3.68912	1.90348	1.90818	2.27064
93	2.36489	1.56442	3.99491	1.93889	1.97653	2.3775
94	2.30553	1.65356	3.96652	1.84784	2.03134	2.29535
95	2.45695	1.67323	3.83815	1.86216	2.24857	2.27038
96	2.50878	1.61083	3.81444	1.91114	2.11969	2.31052
97	2.61176	1.54517	3.76434	1.69084	2.13674	2.47988
98	2.38376	1.63187	3.66332	1.73279	2.22238	2.55851
99	2.56374	1.66919	4.13159	1.79806	2.14179	2.45136
100	2.40097	2.01649	3.94103	1.81124	2.04354	2.35641
101	2.46888	1.73617	3.99669	1.90049	2.13334	2.40497
102	2.53061	1.65391	4.10436	1.70393	2.25967	2.50443
103	2.57956	1.92838	4.44537	1.7054	2.24287	2.54831
104	2.66503	2.01519	4.19042	1.56299	2.26808	2.75451
105	2.44926	2.13899	4.04	1.94118	2.31356	2.63577
106	2.31827	1.80455	4.24216	1.80138	2.56348	2.65278
107	2.35703	2.07301	3.8244	1.87807	2.55678	2.48849
108	2.38861	1.70857	3.80936	1.77287	2.53824	2.49071
109	2.30077	1.60501	3.4984	1.5586	2.44328	2.34774
110	2.56499	2.00139	3.2348	1.67403	2.44346	2.26288
111	2.74434	1.98745	2.95462	1.68778	2.448	2.33039
112	2.66503	1.86361	2.81974	1.67502	2.52843	2.16419
113	2.57038	1.84417	3.18756	1.67297	2.29227	2.37242
114	2.48385	1.78277	3.19393	1.72173	2.60442	2.26096
115	2.46917	1.94666	2.77766	1.83848	2.59337	2.51761
116	2.49077	1.91189	2.82069	1.91017	2.59658	2.25608
117	2.37288	1.83295	3.41321	1.78243	2.4546	2.40364
118	2.45396	1.76461	3.15057	1.85553	2.42811	2.24369
119	2.34127	1.61164	2.77787	1.74514	2.39056	2.31285
120	2.28441	1.68508	3.16627	1.86737	2.39068	2.41048
121	2.33578	1.7905	3.31545	1.7519	2.23057	2.39671
122	2.34431	1.57771	3.52493	1.70452	2.27417	2.25132
123	2.28877	1.70191	3.5127	1.71019	2.38829	2.32374
124	2.35863	1.97691	3.46702	1.83285	2.45569	2.36899
125	2.25126	2.16822	3.90282	1.82595	2.62781	2.25329
126	2.37014	2.07219	3.52271	1.91425	2.86254	2.21946
127	2.12574	2.10687	3.5438	1.91182	2.99396	2.14283
128	2.29469	2.02125	3.53584	1.91269	2.93693	2.4446
129	2.27506	1.77386	3.58542	1.79166	2.99817	2.22287
130	2.08939	1.60724	3.29213	1.69661	3.06606	2.19908
131	2.23295	1.73243	3.34361	1.69535	3.32771	2.26471
132	2.27568	1.90868	3.63565	1.87241	3.18873	2.3284
133	2.32179	1.91355	3.31791	1.64089	3.03562	2.16168
134	2.31007	1.6947	3.24863	1.81337	3.48168	2.18664
135	2.34502	1.89342	3.16088	1.77964	3.47562	2.29902
136	2.44923	1.80611	3.58472	1.82456	3.11419	2.27335
137	2.45094	1.63798	3.20781	1.73356	2.87763	2.20909
138	2.14901	1.73109	3.44639	1.72838	2.97489	2.19747
139	2.20338	1.49956	3.5783	1.62848	3.0268	2.32902
140	2.22656	1.81613	3.90006	1.80638	2.9834	2.2891
141	2.27481	2.0204	3.7509	1.67261	3.01263	2.3787
142	2.10891	1.54133	3.20886	1.64651	2.96042	2.30936
143	2.23255	1.41415	3.58584	1.71013	3.18897	2.19646
144	2.27802	1.3156	3.29387	1.67492	3.27887	2.19362
145	2.47312	1.5245	3.30432	1.87004	3.33379	2.17896
146	2.31369	1.5282	3.4769	1.64497	3.17669	2.32497
147	2.18989	1.42959	3.78704	1.6763	3.39312	2.20096
148	2.22716	1.54634	3.16314	1.60317	3.2002	2.2402
149	2.21436	1.4618	3.12681	1.69181	3.14744	2.29034
150	2.31495	1.52491	3.11012	1.46209	3.36762	2.38934
151	2.16221	1.69931	3.17348	1.56992	3.27773	2.36469
152	2.22242	1.63886	3.38959	1.69057	3.52516	2.31179
153	2.31819	1.89707	3.02064	1.62737	3.59673	2.3611
154	2.22431	1.67035	3.23098	1.52869	3.18442	2.3234
155	2.28796	1.7102	3.09808	1.58712	3.32259	2.2159
156	2.28233	1.49966	3.10426	1.64521	3.31927	2.32767
157	2.31148	1.60597	2.88358	1.68631	3.16183	2.37837
158	2.19952	1.61304	3.47403	1.61364	3.17577	2.30565
159	2.17649	1.67813	3.27024	1.70639	3.16327	2.3144
160	2.00136	1.8613	3.34547	1.77192	3.07722	2.34846
161	2.12608	2.03652	3.26134	1.70371	2.93035	2.38236
162	2.16529	1.86624	3.48811	1.68906	3.09224	2.15625
163	2.08787	1.65807	3.34316	1.60148	2.71763	2.28152
164	2.12678	1.75029	3.3821	1.68379	2.95535	2.42285
165	2.37919	1.81951	3.6307	1.51639	3.57052	2.42498
166	2.4505	1.74154	3.2717	1.54379	3.46958	2.29119
167	2.45431	1.82439	3.77366	1.64555	3.4538	2.42406
168	2.31036	1.62522	3.75683	1.75336	3.78953	2.22136
169	2.57493	1.71912	3.5511	1.79114	3.84739	2.32217
170	2.26573	1.5614	3.96704	1.72539	3.62857	2.21989
171	2.37233	1.72552	3.60067	1.77537	3.7404	2.23244
172	2.31138	1.90276	3.40745	1.78576	3.59219	2.24601
173	2.3376	1.75098	3.24672	1.76777	3.59512	2.19784
174	2.30363	1.72831	3.28732	1.69515	3.43472	2.16874
175	2.40813	1.55785	3.80654	1.8934	3.36922	2.33929
176	2.48623	1.6765	3.90031	1.96216	3.50754	2.22075
177	2.48118	1.6409	4.04057	1.7198	3.33017	2.11688
178	2.38933	1.71932	3.61246	1.77351	3.66801	2.15025
179	2.37012	1.65717	3.78964	1.78693	3.53332	2.14594
180	2.2955	1.9105	3.71882	1.85474	3.40607	2.3877
181	2.3059	1.89021	3.55613	1.90962	3.40082	2.42895
182	2.50034	1.65974	3.31462	1.94857	3.35395	2.42696
183	2.43143	1.74899	3.33998	2.05912	3.35838	2.42701
184	2.11504	1.74979	3.3852	1.762	3.33133	2.37057
185	2.6178	1.77114	4.00392	1.66845	3.51648	2.26763
186	2.56242	1.95917	3.27754	1.83286	3.42399	2.30655
187	2.40013	1.93871	3.34343	1.76717	3.31058	2.36625
188	2.63894	2.05438	3.35528	1.92658	3.18576	2.23316
189	2.62936	1.94435	3.42948	1.74847	3.41887	2.53242
190	2.51125	1.66411	3.54589	1.79991	3.44172	2.45535
191	2.64771	1.78937	3.29776	1.78755	3.31832	2.5119
192	2.30805	2.08224	3.23877	1.83008	3.12786	2.4164
193	2.77416	1.95781	3.37098	1.66976	3.13888	2.2835
194	2.7662	1.86955	3.18664	1.64281	3.17385	2.26218
195	2.6103	1.75653	3.00672	1.74234	3.15896	2.42131
196	2.6087	1.74	3.09613	1.74989	3.21646	2.43753
197	2.55909	1.70936	3.40571	1.83673	3.3259	2.29387
198	2.66763	1.66291	3.32608	1.92283	3.43015	2.06143
199	2.55672	1.50157	3.55513	1.70942	3.49043	2.60998
200	2.4602	1.56396	3.11945	1.67692	3.3832	2.23972
201	2.3997	1.50816	3.5282	1.71971	3.65762	2.31912
202	2.34446	1.66425	3.8982	1.88175	3.64278	2.34626
203	2.19912	1.83031	3.97003	1.83257	3.53765	2.27806
204	2.09919	1.79569	3.6577	1.6711	3.53624	2.02327
205	2.25385	1.82095	3.51812	1.71614	3.3071	2.17103
206	2.17137	1.79092	3.38881	1.86708	3.54207	2.05969
207	2.38459	1.76333	3.62164	1.81466	3.73933	2.0512
208	2.5503	1.67555	3.77652	1.92197	3.55946	2.18487
209	2.486	1.71324	3.78071	1.82706	3.50135	2.25342
210	2.38028	1.68914	3.43282	1.94855	3.30128	2.22795
211	2.41857	1.53557	3.8221	2.10962	3.47952	2.03306
212	2.26015	1.56426	3.85654	2.20333	3.39552	2.42621
213	2.46154	1.92843	3.7384	2.38926	3.36631	2.34085
214	2.28988	1.9418	3.52955	2.16318	3.45477	2.16893
215	2.26002	1.78426	3.54532	2.03819	3.62701	2.21577
216	2.13042	1.54723	3.77551	2.37377	3.67202	2.17186
217	2.24675	1.74244	3.66503	2.29892	3.5744	2.15882
218	2.1655	1.75167	3.47065	2.20103	3.48702	2.28703
219	2.26172	1.84006	3.28626	2.17307	3.75113	2.13593
220	2.37513	1.97604	3.32858	2.15472	3.49874	1.95447
221	2.45519	2.00784	3.39686	1.97198	3.3312	2.12752
222	2.6193	1.83969	3.2801	2.13337	3.49312	2.12162
223	2.739	1.75709	3.77088	1.82526	3.7053	2.12439
224	2.66263	1.85557	3.50007	2.12142	3.31643	2.18719
225	2.33153	1.87675	3.36705	2.28526	3.43567	2.31428
226	2.33574	1.96981	3.11824	2.40095	3.52985	2.22426
227	2.18409	1.89501	3.58911	2.45794	3.65037	2.19537
228	2.43394	1.80144	3.61834	2.3859	3.74623	2.21445
229	2.60187	1.80118	4.07205	2.34993	3.86884	2.13354
230	2.50407	1.85487	4.04163	2.36349	3.73866	2.12402
231	2.32189	1.96113	3.88988	2.29679	3.71349	2.04116
232	2.53184	1.95172	3.99844	2.07008	3.83156	2.34471
233	2.28114	1.88091	3.95259	2.2321	3.71679	2.41693
234	2.3909	1.6832	3.69902	2.4788	3.83975	2.5906
235	2.18493	1.5455	3.75677	2.40314	3.65792	2.47588
236	2.09736	1.70218	3.80763	2.23956	3.80767	2.30077
237	2.17164	1.73133	3.98138	2.19625	3.73187	2.21263
238	2.34606	1.66236	3.78107	2.14679	3.65116	2.06539
239	2.49222	1.92131	3.92148	2.176	3.72354	2.0955
240	2.54842	1.8422	4.00561	2.15374	3.75244	1.97344
241	2.7677	1.9006	4.05437	2.22431	3.83487	2.11184
242	2.97203	2.03082	3.87602	2.35901	4.06663	2.04198
243	2.75455	1.9669	4.01657	2.18375	4.11931	2.16493
244	2.95728	1.88534	3.95269	2.38001	4.14834	2.04173
245	2.86833	1.91666	4.041	2.3953	3.86538	2.26607
246	2.79367	1.917	4.15587	2.02324	3.81853	2.15144
247	2.48546	2.03832	4.03145	2.2427	3.79188	2.1802
248	3.12331	1.87244	4.03049	2.04464	3.78717	2.14976
249	2.84331	1.84969	4.08049	2.15586	3.79287	2.30079
250	2.6072	1.93974	4.39175	2.33764	3.907	2.05208
251	2.40077	1.96403	4.15145	2.06007	3.68358	1.9581
252	2.33493	2.04965	4.18733	2.10058	3.58888	2.09406
253	2.47092	2.23904	4.17173	2.1406	3.73731	2.10591
254	2.51988	2.33332	4.08057	2.06964	3.69186	2.18049
255	2.55075	2.26639	4.06041	1.96882	3.74509	2.21377
256	2.65858	2.04117	3.93728	2.16473	3.74268	2.27754
257	2.55193	1.68326	3.80908	2.00798	3.75979	2.27574
258	2.55309	1.81165	4.09008	2.03138	3.9653	2.03089
259	2.62455	1.94156	4.11628	2.3058	3.86622	2.08624
260	2.69745	2.12393	4.03386	2.13525	3.82897	1.89279
261	2.64154	2.08444	4.32303	2.06842	3.75494	2.12179
262	2.47905	2.06397	4.46507	2.14306	3.70957	2.13643
263	2.40535	2.17753	3.86771	2.16014	3.7381	2.02398
264	2.41162	1.90096	3.93944	2.04319	3.54665	2.08273
265	2.39893	1.99527	3.71351	2.03416	3.80334	1.9839
266	2.60171	1.80529	3.78442	2.0745	3.99176	1.93745
267	2.59633	2.01704	3.6863	2.0511	3.67405	2.08895
268	2.32346	1.8754	3.90961	2.08283	3.72495	2.34901
269	2.20822	1.86534	3.9013	2.08908	3.77166	2.32133
270	2.34579	1.80597	3.81571	2.06143	3.77036	2.20955
271	2.2919	1.68648	3.78848	2.14958	3.83392	2.42429
272	2.40439	1.89529	3.73934	1.91319	3.79302	2.32263
273	2.49953	1.77729	3.78568	2.05094	3.58655	2.16597
274	2.50155	1.69496	3.88605	2.03882	3.96462	2.23106
275	2.4804	1.7569	3.47909	2.19907	3.90545	1.98943
276	2.38737	1.79536	3.44435	2.11296	3.99377	2.03821
277	2.49606	1.88874	3.4774	2.1893	4.02624	1.99872
278	2.64786	1.94572	3.61862	2.15805	3.86607	2.18176
279	2.69877	1.90379	3.59693	2.53224	4.02019	2.15103
280	2.69058	1.81522	3.77822	2.34628	3.85787	2.35436
281	2.64267	1.86636	3.67292	2.31731	3.81476	2.32517
282	2.73844	1.97078	3.97554	2.33259	3.70525	2.27029
283	2.48527	2.05918	3.91793	2.1626	3.68026	2.31838
284	2.70708	1.83523	3.62591	2.30827	3.75336	2.2966
285	2.62105	1.91058	3.40039	2.42835	3.93439	2.2458
286	2.79957	2.16472	3.29708	2.55822	3.85728	2.26653
287	2.60402	2.00244	3.26729	2.19716	3.96022	2.33896
288	2.63021	2.06148	3.67137	2.4303	3.90679	2.27953
289	2.5908	2.09899	3.46746	2.17564	3.97626	2.35588
290	2.31232	1.95926	3.20706	2.28462	3.91943	2.43978
291	2.35946	1.74482	3.54569	2.18418	3.97616	2.33508
292	2.33066	1.69224	4.31332	2.51449	3.97686	2.35022
293	2.53694	1.91286	4.33307	2.38995	4.07502	2.53316
294	2.21656	1.99801	3.86247	2.2686	3.93233	2.39916
295	2.32702	1.98148	4.1906	2.40876	4.18298	2.36367
296	2.52809	1.98171	4.47406	2.28126	4.15132	2.32466
297	2.12338	1.92342	4.31787	2.26391	4.23069	2.33299
298	2.36332	1.73053	3.99312	2.2512	4.12932	2.26344
299	2.31226	1.67118	3.99824	2.49591	4.25325	2.13705
300	2.20836	1.62117	4.23412	2.17148	4.01106	2.2284
301	2.17432	1.86545	4.18678	2.36415	3.96099	2.3072
302	2.25113	1.81529	3.56488	2.29328	4.06823	2.22717
303	2.4058	1.63546	4.05653	2.27454	4.09902	2.26447
304	2.32429	1.82536	4.02397	2.22466	4.13775	2.1806
305	2.23133	1.65095	3.42616	2.33955	4.18437	2.2322
306	2.16206	1.62715	3.61972	2.47771	4.17424	2.29609
307	2.07004	1.69053	3.5985	2.55889	4.17042	2.16365
308	2.2138	1.71503	3.53937	2.53406	4.14882	2.46055
309	2.16567	1.73668	3.75764	2.38109	4.19042	2.40647
310	1.93069	1.70353	3.51922	2.28645	4.10953	2.39345
311	1.90902	1.75682	3.70923	2.3574	4.02033	2.42703
312	2.12815	1.79971	3.76024	2.36575	3.88789	2.31755
313	2.29914	1.96504	3.88843	2.49937	4.00432	2.37739
314	2.32555	1.88645	3.94075	2.66003	4.20129	2.20619
315	2.47003	1.64298	4.02526	2.37664	4.10221	2.30317
316	2.16894	1.74388	4.00122	2.40392	4.10055	2.36914
317	2.23259	1.76194	3.60341	2.51964	3.99008	2.35273
318	2.27456	1.89765	3.67906	2.66593	4.04862	2.38647
319	2.26465	1.96227	3.92606	2.56504	4.17665	2.22252
320	2.34489	1.74459	3.83489	2.46564	4.12957	2.4414
321	2.55049	1.74423	3.71146	2.70194	4.36218	2.17171
322	2.51329	1.79941	3.42296	2.41132	4.25974	2.12259
323	1.95932	1.94283	3.38885	2.50577	4.26079	2.24047
324	2.23043	2.01682	3.83609	2.60282	4.2186	2.20911
325	2.12052	1.92909	3.70231	2.77488	4.47158	2.19663
326	2.17693	2.01628	3.69136	2.78996	4.45345	2.29161
327	2.02798	1.82099	3.77054	2.55873	4.27447	2.18354
328	2.01161	1.99289	3.53847	2.67636	4.23583	2.21913
329	2.33577	1.77425	3.42666	2.53578	4.21261	2.35987
330	2.26692	1.97283	3.24251	2.53797	4.14125	2.31484
331	2.57224	1.96774	3.72794	2.68237	4.12232	2.32426
332	2.2674	1.89434	3.66976	2.55568	4.35141	2.1542
333	2.41639	1.73651	3.83947	2.63816	4.14822	2.31231
334	2.1352	1.84674	3.76656	2.69928	4.17105	2.30015
335	2.09787	2.01364	3.81816	2.44609	4.08766	2.2606
336	1.97106	1.86827	3.94802	2.41055	4.01254	2.22754
337	2.18706	1.77132	3.91669	2.38048	4.23806	2.18135
338	2.1824	1.80019	3.5601	2.5604	4.23066	2.34171
339	2.35752	2.06951	3.64794	2.70725	4.23343	2.22557
340	2.20287	1.99871	3.90871	2.71573	4.30535	2.23276
341	2.51575	2.21725	3.12239	2.67206	4.09094	2.2308
342	2.19407	2.13189	3.18578	2.75164	4.13299	2.22407
343	2.61805	2.15076	3.59435	2.58512	4.08942	2.27037
344	2.72398	2.02918	3.16541	2.5073	4.17929	2.28191
345	2.39936	2.14425	3.6201	2.76709	4.12012	2.30876
346	2.70559	2.0758	3.36982	2.54148	4.11284	2.17164
347	2.68731	2.16451	3.78029	2.62494	4.18456	2.18024
348	2.47234	2.29969	3.81095	2.65502	4.28604	2.18901
349	2.71201	2.49357	3.76993	2.58425	4.27779	2.29041
350	2.5377	2.48239	3.41123	2.86684	4.19969	2.35013
351	2.57952	2.20011	3.79433	2.8278	4.18516	2.42207
352	2.63355	2.31453	3.51999	2.76566	4.13827	2.47783
353	2.44681	2.57692	3.1335	2.81892	3.97951	2.36444
354	2.65034	2.43357	3.3844	2.7601	4.04419	2.38007
355	2.89067	2.41907	3.52986	2.75112	4.0413	2.42908
356	2.7298	2.32837	3.70427	2.70895	4.02115	2.1923
357	2.56694	2.09961	3.79085	2.62935	4.1637	2.31997
358	2.38704	2.39517	4.02564	2.82033	4.03273	2.20825
359	2.56528	2.16839	4.49134	2.70037	3.89795	2.36667
360	2.68257	2.16319	3.95469	2.81626	3.62576	2.38745
361	2.49837	2.30254	4.27214	2.82368	3.98257	2.26209
362	2.35486	2.2451	4.38226	2.64484	3.79988	2.33299
363	2.56595	2.28369	4.49389	2.80435	4.14109	2.22726
364	2.49813	2.20956	4.37344	2.47915	4.07519	2.23146
365	2.53162	2.22053	4.33183	2.75299	4.00148	2.19479
366	2.59308	2.12082	4.50377	2.72217	4.16185	2.30813
367	2.57244	2.10899	4.42887	2.65321	4.07544	2.16702
368	2.52463	2.01716	4.13931	2.86469	4.11235	2.29447
369	2.58396	1.98579	4.11438	2.60534	3.89318	2.31124
370	3.27718	2.21496	3.90368	2.64981	3.85084	2.22246
371	2.91644	2.31019	3.86868	2.42858	3.82783	2.12707
372	3.03747	2.27718	3.80713	2.88869	4.06772	2.46604
373	3.12327	2.44188	3.54018	2.73653	3.94096	2.36925
374	2.58913	2.30327	3.29103	2.46648	3.92111	2.24145
375	2.73424	2.11745	3.35779	2.78259	3.98225	2.36433
376	2.99227	2.03662	3.70727	2.64321	4.05594	2.24322
377	2.56031	1.84435	3.72578	2.88935	3.67014	2.35555
378	2.40223	1.76355	3.94861	2.53595	3.8766	2.22486
379	2.15505	1.85327	3.84281	2.79222	3.89939	2.23691
380	2.32146	1.9572	4.11569	2.64544	3.81919	2.17376
381	2.53115	2.05232	3.72101	2.72299	3.55878	2.17285
382	2.24777	1.89863	3.69389	2.99869	3.72425	2.09594
383	2.22666	2.09218	3.44483	2.89173	3.83212	2.04259
384	2.46999	2.16209	3.42215	2.84501	3.63409	2.08932
385	2.42289	2.18488	3.9233	2.83337	3.48584	2.13949
386	2.29981	2.10072	3.86128	2.97856	3.50885	2.19259
387	2.43587	2.05648	3.74459	2.9289	3.67698	2.30333
388	2.53088	2.31514	3.95767	2.9235	3.80844	2.16976
389	2.43732	2.13423	4.33608	2.90545	3.59666	2.21211
390	2.34779	2.02383	4.41431	2.7501	3.49203	2.19085
391	2.76194	2.27263	4.28297	2.98334	3.51425	2.1826
392	2.62102	2.07703	4.28378	3.04135	3.51724	2.17671
393	2.54268	1.83264	3.97035	2.803	3.7074	2.12884
394	2.67627	1.71902	4.12453	3.14912	3.62095	2.42642
395	2.43877	1.94515	3.95477	3.05163	3.58041	2.26071
396	2.48947	1.84817	4.31618	2.91801	3.70789	2.24913
397	2.5537	2.0113	4.05972	2.80789	3.69001	2.45772
398	2.34964	2.03694	4.59062	2.75762	3.79721	2.23791
399	2.56313	1.93759	4.35834	2.71133	3.98933	2.21146
400	2.61236	1.94871	4.55296	2.67679	4.17281	2.21046
401	2.39587	1.9828	4.53133	2.8799	4.22687	2.22866
402	2.5043	1.6888	4.86819	2.6369	4.02531	2.13171
403	2.57705	1.93534	4.80982	2.74491	3.98817	2.16884
404	2.82724	2.02364	4.5205	2.73983	4.09698	2.30054
405	2.40452	1.93157	4.68207	2.81176	3.92571	2.35918
406	2.53804	1.95558	4.13953	2.73454	4.12377	2.50668
407	2.56449	1.87546	4.44965	2.6911	4.03812	2.4292
408	2.58944	1.94565	4.01952	2.51156	4.17317	2.21002
409	2.59262	1.82454	4.08121	2.62767	4.09092	2.13819
410	2.56106	1.90094	4.1049	2.74519	3.93591	2.17955
411	2.51136	1.99153	4.59973	2.71401	3.88979	2.22335
412	2.43212	2.10451	4.52994	2.96982	3.65746	2.31336
413	2.48115	2.29052	4.1468	2.52217	3.89492	2.23302
414	2.36923	2.24124	4.0638	2.48359	3.82365	2.27909
415	2.17466	2.09752	4.1824	2.62044	3.90844	2.21353
416	2.1217	2.02354	4.28514	2.73754	3.75644	2.3295
417	2.10753	2.14178	4.3792	2.68547	3.87157	2.33295
418	2.33936	2.07944	4.56122	2.59148	3.78568	2.27749
419	2.34946	1.89239	4.18399	2.69315	3.8818	2.35375
420	2.57991	1.94204	3.87513	2.66039	3.9259	2.43196
421	2.52767	2.07411	4.40237	2.79156	3.79603	2.43872
422	2.44033	1.9208	4.65814	2.72937	3.66162	2.25795
423	2.46995	2.13921	4.64934	2.89931	3.66407	2.24676
424	2.61262	2.11097	4.54863	2.89692	3.93752	2.09024
425	2.58143	2.20038	4.17813	2.73487	3.91325	2.18093
426	2.37491	2.25579	3.90193	2.80269	3.8834	2.25861
427	2.48004	2.35147	3.70909	2.83361	3.84492	2.25132
428	2.47006	2.09492	4.0719	2.61119	3.77659	2.11585
429	2.20467	2.19343	3.97951	2.68566	3.83729	2.19204
430	2.34111	2.16418	4.16581	2.68853	3.92506	2.22109
431	2.24004	2.14199	4.13064	2.36262	3.82406	2.47333
432	2.48351	1.98851	4.04571	2.39429	3.97346	2.5708
433	2.39939	2.13643	3.95227	2.5686	3.87026	2.31134
434	2.49791	2.17715	4.38958	2.85769	3.85296	2.22037
435	2.48225	2.29344	4.47193	2.53987	3.96345	2.32409
436	2.4562	1.96289	4.3506	2.7873	3.79713	2.35338
437	2.48891	2.01509	4.26784	2.64686	3.89326	2.25889
438	2.34013	1.96041	4.26792	2.61165	3.83271	2.31481
439	2.42577	1.96444	4.44041	2.84035	3.86218	2.35218
440	2.28851	1.96352	4.62519	2.70983	3.92515	2.28809
441	2.41631	2.04502	4.39514	2.59069	3.81696	2.26554
442	2.44425	1.91218	4.64504	2.8884	4.0338	2.32217
443	2.32803	1.9638	4.55028	2.68012	3.79823	2.4074
444	2.45504	2.13073	4.38715	2.32209	3.63153	2.31172
445	2.4284	2.33586	4.54465	2.37735	3.80801	2.32247
446	2.3666	2.10721	4.69927	2.4995	3.78581	2.37357
447	2.25127	2.15462	4.29441	2.46408	3.84078	2.40895
448	2.30827	2.13228	4.27645	2.60914	4.10661	2.26248
449	2.42774	2.16836	4.30308	2.62647	4.08348	2.4595
450	2.46581	1.94871	4.55296	2.67679	3.95982	2.41742
451	2.37582	1.9828	4.53133	2.8799	4.00063	2.5501
452	2.32043	1.6888	4.86819	2.6369	3.84236	2.46899
453	2.42147	1.93534	4.80982	2.74491	4.01491	2.4738
454	2.50325	2.02364	4.5205	2.73983	4.35104	2.36413
455	2.3565	1.93157	4.68207	2.81176	3.99677	2.49692
456	2.43564	1.95558	4.13953	2.73454	4.04334	2.37122
457	2.25971	1.87546	4.44965	2.6911	3.8566	2.27682
458	2.21106	1.94565	4.01952	2.51156	3.92658	2.49157
459	2.19181	1.82454	4.08121	2.62767	4.02366	2.29394
460	2.08828	1.90094	4.1049	2.74519	4.01859	2.19906
461	2.42038	1.99153	4.59973	2.71401	4.0528	2.34505
462	2.1192	2.10451	4.52994	2.96982	3.90368	2.30272
463	2.18859	2.29052	4.1468	2.52217	3.97607	2.29436
464	2.23811	2.24124	4.0638	2.48359	4.0666	2.32027
465	2.18047	2.09752	4.1824	2.62044	4.09057	2.2808
466	2.21321	2.02354	4.28514	2.73754	3.88399	2.46518
467	2.28351	2.14178	4.3792	2.68547	4.07481	2.45538
468	2.17289	2.07944	4.56122	2.59148	4.14947	2.38347
469	2.15695	1.89239	4.18399	2.69315	4.15566	2.5001
470	2.52666	1.94204	3.87513	2.66039	4.04657	2.33512
471	2.47696	2.07411	4.40237	2.79156	4.0983	2.25464
472	2.11258	1.9208	4.65814	2.72937	4.17992	2.33255
473	2.20515	2.13921	4.64934	2.89931	4.09482	2.40997
474	2.25637	2.11097	4.54863	2.89692	3.90672	2.4597
475	2.38886	2.20038	4.17813	2.73487	4.15429	2.54074
476	2.47566	2.25579	3.90193	2.80269	4.07259	2.467
477	2.60718	2.35147	3.70909	2.83361	4.15894	2.44263
478	2.62137	2.09492	4.0719	2.61119	4.01991	2.54274
479	2.47294	2.19343	3.97951	2.68566	3.96279	2.50824
480	2.44967	2.16418	4.16581	2.68853	3.79046	2.41474
481	2.52021	2.14199	4.13064	2.36262	3.68056	2.39694
482	2.45357	1.98851	4.04571	2.39429	3.71402	2.56745
483	2.4592	2.13643	3.95227	2.5686	3.76932	2.55506
484	2.42501	2.17715	4.38958	2.85769	3.73895	2.57956
485	2.59427	2.29344	4.47193	2.53987	3.70098	2.56272
486	2.53475	1.96289	4.3506	2.7873	3.8476	2.74571
487	2.62154	2.01509	4.26784	2.64686	3.67045	2.53966
488	2.51643	1.96041	4.26792	2.61165	3.61485	2.43427
489	2.43811	1.96444	4.44041	2.84035	3.86752	2.38856
490	2.43444	1.96352	4.62519	2.70983	3.74761	2.50321
491	2.57811	2.04502	4.39514	2.59069	3.85081	2.3682
492	2.58159	1.91218	4.64504	2.8884	3.64295	2.39513
493	2.59793	1.9638	4.55028	2.68012	3.66969	2.36709
494	2.63748	2.13073	4.38715	2.32209	3.7154	2.40407
495	2.68718	2.33586	4.54465	2.37735	3.76479	2.34471
496	2.69834	2.10721	4.69927	2.4995	3.93601	2.37966
497	2.44523	2.15462	4.29441	2.46408	3.90641	2.4362
498	2.51525	2.13228	4.27645	2.60914	3.87906	2.44207
499	2.63055	2.16836	4.30308	2.62647	4.09037	2.40656
Avarage RMSD	2.31243	1.84035	3.67561	2.17512	3.31117	2.19696

## Sheet: CTP synthase
	CHEMBL48494	CHEMBL1162979	CHEMBL133039	CHEMBL525202	CHEMBL1091856	CTP Synthase
0	0	0	0	0	0	0
1	0.930185	0.822659	0.961251	1.054	0.942493	1.03398
2	1.09386	1.27027	0.957864	1.26531	1.03786	1.13012
3	1.165	1.61626	0.961675	1.46792	1.13864	1.14569
4	1.23932	1.36517	1.02349	1.46002	1.59581	1.31789
5	1.35963	1.46541	1.05617	1.57062	1.40537	1.54061
6	1.51707	1.83177	1.14445	1.71244	1.46903	1.76882
7	1.81942	2.06821	1.13547	1.5551	1.3643	1.6051
8	1.79389	1.88083	1.13952	1.73059	1.44553	1.89876
9	2.03702	1.81905	1.24459	1.54271	1.44942	2.04327
10	1.96629	1.58494	1.12575	1.62381	1.68644	1.98191
11	1.7931	1.68735	1.15409	1.55268	1.58472	1.9104
12	1.88438	2.0541	1.19009	1.59994	1.49608	1.79827
13	1.96086	1.77671	1.23873	1.70618	1.50554	1.71935
14	1.91164	1.82573	1.3964	1.77533	1.42113	1.74648
15	1.79577	1.63476	1.28511	1.72537	1.66498	1.93446
16	1.95398	1.64832	1.32666	1.7167	1.67584	1.92208
17	1.94574	1.74181	1.39748	1.86406	1.6332	2.1874
18	2.03898	1.7697	1.35183	1.86861	1.49348	2.32591
19	1.9089	1.62598	1.42749	1.65024	1.77664	2.11067
20	2.01909	1.6529	1.40622	1.77793	1.72002	2.04435
21	2.01197	1.85259	1.44463	1.57813	1.67464	2.19612
22	1.95005	1.62877	1.66162	1.72937	1.85753	2.20283
23	2.09692	1.68876	1.41941	1.72974	1.80911	2.22667
24	1.97708	1.88132	1.54878	1.97878	1.88259	2.14392
25	2.08215	1.72512	1.478	2.01607	1.82962	1.85874
26	2.08046	1.91488	1.63667	1.7226	1.98496	2.03271
27	2.20823	1.771	1.55498	1.74681	2.01852	2.02146
28	2.17577	1.85017	1.70093	1.78618	2.0549	2.02765
29	1.89832	1.81869	1.60788	1.84039	1.873	2.04956
30	1.96283	1.85019	1.54996	1.89287	1.84109	1.96942
31	2.10916	1.83294	1.48918	1.94241	1.81315	1.9492
32	2.11833	2.04329	1.61614	2.01974	1.99426	2.00924
33	2.17909	1.72612	1.55952	1.79585	1.90412	1.77586
34	2.00084	2.1528	1.69729	1.96285	1.84183	2.04169
35	1.91946	2.0991	1.66876	1.92959	1.88759	2.23979
36	2.05011	2.15895	1.7613	2.0951	1.86838	2.03021
37	2.02791	2.28505	1.7136	2.17893	1.87178	2.08446
38	1.903	2.11826	1.62549	2.25562	1.67961	2.11869
39	1.82909	2.47572	1.72315	2.03046	1.80023	2.00816
40	1.88233	2.44324	1.7214	1.94132	1.81591	2.34345
41	2.17206	2.06719	1.60952	2.08692	1.84758	2.46753
42	2.17915	2.21604	1.49677	2.13608	1.80634	2.31076
43	1.89574	2.07862	1.70635	2.04838	1.59447	2.28136
44	2.0687	2.14484	1.45527	2.21173	1.61453	2.129
45	1.82776	2.19646	1.48196	2.09419	1.71062	2.07855
46	1.76413	2.31929	1.52131	1.95021	1.65872	2.42057
47	1.93524	2.56449	1.57163	1.84746	1.66826	2.2827
48	1.85952	2.59687	1.74375	1.85972	1.63676	2.3526
49	1.77878	2.63527	1.46177	1.8692	1.65328	2.21098
50	1.9986	2.6507	1.75465	1.81481	1.58872	2.22654
51	2.04045	2.57062	1.54125	2.06016	1.6602	2.25756
52	1.78682	2.51218	1.66696	2.22942	1.58978	2.1001
53	1.85111	2.72416	1.6605	2.17571	1.63871	1.84146
54	1.84575	2.54007	1.47636	2.05612	1.69088	1.95177
55	1.87666	2.61371	1.36529	2.1449	1.80492	2.24109
56	1.91173	2.72113	1.60236	2.19012	1.54998	1.99732
57	1.95128	2.64351	1.60103	2.25687	1.67352	2.14254
58	1.9544	2.67862	1.53558	2.20185	1.53314	1.86764
59	1.96904	2.55597	1.51845	2.35024	1.51865	2.07826
60	1.89972	2.59736	1.57212	2.32579	1.46844	2.13633
61	2.10372	2.84413	1.43931	2.05917	1.61434	2.00643
62	2.00966	2.70399	1.5221	2.01143	1.53654	1.92129
63	2.14429	2.5375	1.62253	2.2238	1.63899	2.09126
64	2.05694	2.92173	1.56824	2.04913	1.55932	1.88372
65	2.00264	2.96487	1.58495	2.41168	1.67212	2.01619
66	2.18978	2.84903	1.77472	2.24344	1.59748	1.97966
67	2.09916	2.79209	1.85382	2.28163	1.45095	2.20374
68	2.19942	2.83109	2.03978	2.36133	1.61213	2.17997
69	2.34825	3.02295	2.0969	2.56461	1.477	1.94545
70	2.30946	2.79495	2.30166	2.34587	1.69901	2.0548
71	2.32639	2.75494	2.19663	2.35478	1.54457	1.93922
72	2.34657	2.9605	2.19973	2.2716	1.68903	2.0276
73	2.1306	2.82117	1.97245	2.17022	1.56605	2.04351
74	2.24112	2.70913	2.17714	2.0338	1.6686	2.25306
75	2.27434	3.01937	2.11704	2.25252	1.66624	1.89879
76	2.23408	2.69547	2.0947	2.32552	1.55182	2.11989
77	2.18899	2.57305	2.01782	2.20191	1.80549	2.31081
78	2.32135	2.81407	1.87372	2.53016	1.73541	2.13131
79	2.37553	2.53087	1.86211	2.54606	1.61864	2.17255
80	2.15337	2.59313	1.66708	2.56919	1.88229	2.02029
81	2.37478	2.78141	1.83561	2.73758	1.81868	2.0247
82	2.21909	2.8139	1.83515	2.61172	1.7896	2.28833
83	1.92504	2.93194	2.0576	2.45813	1.75083	2.17523
84	2.26642	2.75151	2.04205	2.31739	1.6624	2.09825
85	2.13876	2.79948	2.19394	2.12825	1.63973	2.13581
86	2.18107	2.93179	2.18233	2.0856	1.77429	2.06005
87	2.05937	2.72479	2.35657	2.1528	1.51574	1.82162
88	1.97271	2.77696	2.21952	2.17834	1.72559	1.91396
89	2.21558	2.70357	2.22851	2.28344	1.65217	1.98428
90	2.20316	2.66015	2.28187	2.30367	1.93799	2.11383
91	2.15012	2.6446	2.10861	2.29929	1.6747	1.89688
92	1.92798	2.74076	2.34054	2.40336	1.72138	1.82395
93	1.98513	2.78119	2.26873	2.27224	1.59356	2.04667
94	1.98202	2.57693	2.09928	2.33442	1.63619	1.90014
95	2.36896	2.58953	2.11504	2.30004	1.75031	1.87109
96	2.28366	2.66412	2.14122	2.1866	1.75704	1.83495
97	2.41286	2.74691	2.31549	2.21854	1.65929	1.82683
98	2.14415	2.56783	2.14182	1.93561	1.73652	1.9669
99	2.22707	2.57493	1.84342	2.03607	1.73412	2.06949
100	1.96001	2.63424	1.82842	1.87758	1.69479	1.8782
101	2.05527	2.71221	1.68826	2.00349	1.78852	1.92741
102	2.07968	2.60177	1.64799	2.1009	1.76217	2.00874
103	2.14827	2.55512	1.73117	2.17189	1.76533	1.78616
104	2.17862	2.54989	1.73246	2.20048	1.80772	1.87526
105	2.13561	2.61787	1.84985	2.21355	1.8395	1.875
106	2.27421	2.54226	1.7499	2.13504	1.75481	1.6777
107	1.93363	2.45881	1.70388	2.1203	2.0158	1.83336
108	2.22168	2.38617	1.87797	2.34545	1.91435	1.84085
109	2.1163	2.6364	1.72332	2.04714	1.7875	1.80459
110	2.13652	2.50463	1.76809	1.94417	1.671	1.90434
111	1.96895	2.6186	1.76566	2.02857	1.71731	1.86795
112	2.26901	2.29953	1.84981	1.89976	2.05335	1.98902
113	2.19555	2.38152	1.97108	1.83618	1.77146	2.10695
114	2.27556	2.47296	1.76513	1.93176	1.81814	1.98425
115	2.21941	2.45776	1.85585	1.86228	2.05152	1.89429
116	2.01226	2.49823	1.93675	1.83847	1.75294	1.73986
117	2.06272	2.47816	1.83345	1.76833	1.80578	1.96963
118	2.13838	2.46903	1.75074	2.00189	1.68225	1.87218
119	2.62369	2.3773	1.8721	1.9106	1.79125	1.77624
120	2.57738	2.57307	1.76225	2.10092	1.9386	1.89192
121	2.62006	2.43661	1.80958	2.21227	1.74541	1.99483
122	2.46476	2.30579	1.83985	1.88345	1.89064	1.81915
123	2.2966	2.2815	1.90748	1.88717	1.77657	1.82367
124	2.34696	2.26516	1.69306	1.84362	1.92018	1.89855
125	2.21617	2.20708	1.84511	1.77199	1.97185	1.78893
126	2.03977	2.25918	1.96061	1.75661	2.01749	1.92057
127	2.12746	2.31452	1.8141	1.7299	1.82432	1.89615
128	2.30752	2.30608	1.84971	1.96719	1.69153	1.81838
129	2.25361	2.42462	1.61342	2.00498	1.89327	1.80863
130	1.96095	2.4495	1.81116	1.93002	1.7133	1.8624
131	1.95671	2.49402	1.73311	1.78786	1.82532	1.7213
132	2.12329	2.42786	1.59036	1.83442	1.7662	1.897
133	2.18645	2.56823	1.57668	1.85465	1.75792	1.80225
134	2.1653	2.35986	1.656	1.78319	1.87945	1.99435
135	1.96883	2.35313	1.69532	1.8582	2.02997	2.05937
136	1.95921	2.50756	1.73815	1.82855	1.97401	1.97259
137	1.8317	2.2797	1.67042	1.98924	1.69998	2.06088
138	1.9838	2.53784	1.67001	2.06137	2.02539	2.07463
139	2.2269	2.27667	1.64406	1.93943	1.88138	1.92983
140	2.1636	2.30977	1.71989	1.9556	1.80267	1.99264
141	2.10488	2.48527	1.8693	2.00551	2.00499	1.98291
142	2.07282	2.53949	1.79731	1.81591	1.80021	1.95163
143	2.08952	2.52132	1.8544	2.01135	1.98776	2.05673
144	2.18815	2.39484	1.7252	2.06478	1.86427	2.06085
145	2.15469	2.6005	1.77728	2.02067	1.84166	2.05336
146	2.12829	2.17482	1.86968	2.12048	1.81663	2.16697
147	2.20431	2.34747	1.81648	2.0106	1.96584	2.17205
148	2.35635	2.31701	1.77625	1.91187	1.87689	2.03853
149	2.36673	2.49446	1.81764	1.97624	1.67583	2.30169
150	2.1029	2.6169	1.84421	1.91461	1.87142	2.04569
151	2.26426	2.46092	1.80814	1.89436	1.72149	2.00815
152	1.84852	2.4294	1.62401	1.96034	1.65852	1.86355
153	1.85432	2.52617	1.71505	1.9925	1.77288	1.81917
154	2.04198	2.51076	1.59906	2.07283	1.76573	1.79792
155	2.09852	2.45223	1.68301	1.92773	1.98799	1.84576
156	1.90172	2.57788	1.83724	2.02435	1.85222	1.83757
157	2.22705	2.44515	1.81277	2.06575	1.92514	1.89017
158	2.08203	2.46465	1.91356	2.16734	1.93339	1.89083
159	2.01758	2.48071	1.66447	2.024	1.75877	1.9434
160	2.19568	2.66458	1.92662	2.01572	1.8519	1.97405
161	2.06669	2.52222	1.80985	2.22882	1.9705	1.88349
162	2.26009	2.55827	1.60305	2.16558	2.05814	1.70994
163	2.19326	2.52101	1.71587	2.09065	1.77561	1.80886
164	2.42578	2.39688	1.70206	2.09968	1.91369	1.98328
165	2.51075	2.53508	1.69417	2.07212	1.94628	1.89332
166	2.73356	2.51695	1.78215	2.13219	1.91964	2.00274
167	2.52962	2.64527	1.75993	2.09456	1.86214	1.9001
168	2.41871	2.42035	1.73947	2.26233	1.82154	1.76759
169	2.38143	2.53599	1.77829	2.17116	1.91036	1.92247
170	2.30504	2.41735	1.84948	2.43844	1.59737	2.0418
171	2.18324	2.62548	1.82527	2.39218	2.10019	1.92073
172	2.5247	2.56447	1.912	2.14507	2.02727	1.86751
173	2.38775	2.50408	1.68913	2.18947	1.752	2.063
174	2.57199	2.29415	1.67548	2.25276	2.01008	2.12152
175	2.26405	2.2325	1.94754	2.01907	1.93384	1.8343
176	2.42409	2.29148	1.74489	2.04979	1.99125	1.88928
177	2.63132	2.22718	1.90866	2.13904	1.86702	1.97978
178	2.39554	2.29504	1.99316	2.14305	1.91076	1.98515
179	2.71636	2.49986	1.85515	2.20627	1.84676	2.17323
180	2.37489	2.50278	1.9038	2.12398	1.88588	2.1459
181	2.40857	2.35147	1.80906	2.01044	1.63269	2.05905
182	2.43098	2.38933	1.63118	2.17651	1.86404	2.12078
183	2.25359	2.55452	1.77736	2.29066	1.85409	1.81424
184	2.00447	2.49432	1.66544	2.3299	1.95834	2.08307
185	2.35156	2.24187	1.77466	2.47344	2.01501	2.11399
186	2.3128	2.33916	1.78908	2.43081	1.92091	2.1131
187	2.44384	2.28426	1.80863	2.50316	1.85014	2.08188
188	2.30002	2.52146	1.68443	2.25424	1.86282	2.08949
189	2.20721	2.44774	1.67727	2.37518	1.96184	2.17207
190	2.26838	2.45471	1.73206	2.42159	1.84601	2.15174
191	2.51615	2.43187	1.91837	2.36614	2.03409	2.30601
192	2.60756	2.56266	1.66111	2.26071	1.97334	2.1224
193	2.50891	2.62531	1.70425	2.2688	2.11537	2.02693
194	2.31805	2.46528	1.83708	2.06028	2.10691	1.9589
195	2.37582	2.60106	1.79571	2.26423	2.01257	2.04276
196	2.26538	2.64687	1.73656	2.00884	2.12648	2.11473
197	2.14823	2.51225	2.00979	2.0867	2.15002	2.03779
198	2.39666	2.68324	2.05089	2.31325	2.29238	2.03405
199	2.37039	2.70991	2.09913	2.3451	2.19816	1.94826
200	2.28134	2.75774	2.15814	2.42165	2.30842	2.21397
201	2.33854	2.52926	1.88715	2.3178	2.18555	2.03957
202	2.44018	2.45465	2.0401	2.33134	2.19592	2.25306
203	2.12383	2.54257	2.21653	2.30053	2.19564	2.10107
204	2.2383	2.61197	2.01152	2.52025	2.39509	2.33168
205	2.55021	2.53773	2.03995	2.31281	2.48949	2.36905
206	2.67079	2.59163	2.15742	2.31206	2.06241	2.04674
207	2.55292	2.57287	2.17003	2.37667	1.89619	2.12055
208	2.31879	2.51022	2.08393	2.42664	1.98302	2.29846
209	2.23273	2.33412	1.90998	2.11489	1.88458	2.18097
210	2.0749	2.50356	2.00451	2.28599	1.86882	2.04589
211	2.09993	2.42506	1.94339	2.06951	1.86656	2.09437
212	2.03192	2.56191	2.08526	1.98582	2.18313	2.02537
213	1.8677	2.46341	1.85091	1.86426	1.90986	2.16634
214	1.93536	2.79806	2.00316	2.04943	1.95129	2.16092
215	2.13732	2.51021	2.38681	2.10784	2.03335	2.15055
216	2.01378	2.52928	1.89619	2.2739	2.1293	2.29015
217	1.92445	2.50806	2.14129	2.33497	2.05582	2.57032
218	1.94156	2.30207	2.26084	2.26842	2.07988	2.15871
219	1.94016	2.25495	2.24628	2.30915	2.07188	2.27615
220	2.11444	2.32997	2.11135	2.05477	2.19087	2.28886
221	2.31534	2.53985	2.08553	2.23003	2.0776	2.03994
222	2.20212	2.33094	2.05498	2.39918	2.12728	2.16025
223	2.26259	2.39417	1.88549	2.26162	2.32687	1.96631
224	2.17788	2.45717	1.70875	2.34296	2.267	1.87836
225	1.92643	2.47238	1.76809	2.42537	2.22725	2.05551
226	2.02946	2.39132	1.81014	2.18572	2.04963	2.12404
227	2.10334	2.36378	1.87547	2.32807	2.19422	2.05237
228	2.01231	2.56136	1.66209	2.18058	2.18869	2.10323
229	1.94397	2.44986	1.73283	2.28692	2.10972	2.28015
230	1.98756	2.28155	1.83174	2.19445	2.12193	2.15577
231	1.97065	2.48244	2.00372	2.16763	2.16316	2.12438
232	1.86001	2.69128	2.20959	2.19339	2.18791	2.26702
233	1.93413	2.42225	1.94948	2.31697	2.15399	2.05221
234	2.04944	2.45426	1.95893	2.34647	2.20973	2.36213
235	1.91256	2.33146	1.79944	2.33604	2.19821	2.20136
236	1.92801	2.25142	1.93434	2.46171	2.06795	2.31274
237	1.78467	2.32418	1.92748	2.25793	2.09766	2.24617
238	2.01462	2.17663	2.08588	2.3468	2.24932	2.24738
239	1.96714	2.34607	2.01649	2.22666	2.09198	2.34308
240	2.01144	2.33472	1.94763	2.24632	2.18122	2.18644
241	1.91435	2.43161	1.97665	2.28895	1.91339	2.16476
242	1.78439	2.33953	1.97223	2.32225	2.18487	2.00302
243	1.84111	2.34141	2.07324	2.21698	2.20112	2.06881
244	1.95886	2.39982	2.00489	2.1891	2.21877	2.30505
245	1.82843	2.15397	1.92176	2.33121	2.10769	2.10305
246	1.89302	2.18812	1.8535	2.21567	2.03658	2.0976
247	1.83157	2.30512	1.88824	2.20467	1.80407	2.29739
248	1.89272	2.27186	1.89639	2.16044	1.88803	2.01566
249	1.89192	2.7124	1.84748	2.24637	2.09647	1.90045
250	1.85228	2.5576	1.84104	2.38433	1.96058	2.00578
251	1.92739	2.36381	1.92416	2.24459	1.94457	2.08461
252	1.87208	2.47885	1.93922	2.42578	1.97154	2.14889
253	1.91738	2.34121	1.95044	2.45979	2.04308	2.09487
254	1.88058	2.4982	2.04461	2.42811	2.00165	2.04455
255	1.9972	2.46368	2.03926	2.62796	2.06202	2.42061
256	1.83741	2.49001	2.00609	2.5642	2.10251	2.26725
257	1.93174	2.58864	1.9712	2.44291	1.92083	2.20574
258	2.0256	2.60913	2.02571	2.41059	1.87352	2.08234
259	2.09254	2.57964	2.01365	2.66456	2.03174	2.18108
260	1.83279	2.63135	1.99456	2.51802	1.91624	1.9065
261	1.83244	2.45336	1.7818	2.53235	1.84303	2.2503
262	1.96808	2.37716	1.80315	2.49097	1.94252	2.17164
263	1.87275	2.32335	2.06962	2.36991	1.82307	2.35888
264	1.87887	2.435	1.86961	2.2602	1.90342	2.13066
265	1.82862	2.32235	2.06509	2.26091	1.80005	2.16323
266	2.08362	2.38725	2.23979	2.38142	1.77581	2.14059
267	1.85539	2.35477	2.06696	2.41559	1.86512	2.2648
268	1.72042	2.28193	2.02681	2.32556	2.04439	2.41853
269	1.90572	2.2733	2.03929	2.50412	2.16327	2.19181
270	1.77324	2.41718	1.98098	2.5011	1.97864	2.09892
271	1.89618	2.22429	2.03739	2.43712	2.21125	2.29404
272	1.87501	2.24628	2.02956	2.4153	2.04715	2.2499
273	1.79543	2.46759	1.96492	2.64564	1.96766	2.03629
274	1.86718	2.39254	1.85352	2.55861	1.99664	2.18314
275	1.85485	2.55283	1.91175	2.45822	1.75753	2.03218
276	1.8304	2.42676	1.84857	2.63647	2.08099	1.98306
277	1.94377	2.57421	2.0664	2.62993	2.04472	2.18201
278	2.05645	2.48033	2.13213	2.58988	2.06688	2.12775
279	1.87474	2.48607	1.87858	2.53171	2.02351	2.35573
280	1.88085	2.4906	2.02627	2.57824	1.99287	2.44448
281	1.87543	2.5737	2.16375	2.589	2.1116	2.25578
282	1.89191	2.68774	2.24986	2.35065	1.98808	2.18897
283	1.93949	2.77088	2.1544	2.50082	1.89749	2.20852
284	2.03028	2.39163	2.17463	2.78236	1.8436	2.1076
285	2.02145	2.43608	2.33848	2.5622	1.93809	2.05123
286	2.17047	2.37805	2.03328	2.55262	2.10958	2.17773
287	1.93724	2.3519	2.2233	2.70511	2.0082	1.78471
288	1.93338	2.43786	1.96189	2.75474	1.98055	2.04753
289	1.99444	2.389	1.97352	2.685	2.12598	2.22211
290	1.98542	2.2154	1.99295	2.49251	2.03712	2.27712
291	2.09067	2.33969	2.02187	2.52145	2.11851	2.11458
292	2.38657	2.31718	1.92682	2.65768	1.9527	2.12721
293	2.22985	2.31091	2.07264	2.85283	1.96881	2.01433
294	2.09595	2.44373	1.94032	2.76452	1.95037	2.0687
295	2.17151	2.60008	1.81368	2.65186	2.01363	2.01455
296	2.10057	2.37945	1.84951	2.75375	1.9855	2.1275
297	1.86187	2.45987	1.89765	2.7312	1.84107	2.23043
298	1.85133	2.59677	2.13389	2.79202	1.81367	2.07616
299	2.04918	2.46693	2.16643	2.86694	1.92112	2.33958
300	2.13087	2.32246	2.11578	2.69022	1.90263	2.24145
301	2.05794	2.4293	1.98021	2.63291	1.92585	2.02922
302	1.96324	2.24613	2.20423	2.59166	1.95912	2.12778
303	1.96725	2.42	2.08958	2.60602	2.14875	2.01184
304	1.99696	2.43202	2.08535	2.42943	2.24945	2.09921
305	2.13479	2.39842	1.93645	2.44419	1.95967	2.13629
306	1.96361	2.43326	1.9726	2.45915	2.07053	2.20345
307	2.13684	2.48271	2.40486	2.63693	2.11313	2.122
308	1.82622	2.60491	2.1775	2.55606	1.88157	2.041
309	2.27404	2.23367	2.19676	2.54976	2.0165	2.0609
310	1.90536	2.41503	2.28715	2.33453	2.01069	2.14946
311	1.93571	2.51738	2.03261	2.30859	1.82133	2.04335
312	2.07448	2.68681	2.01368	2.512	1.86215	2.06089
313	1.99781	2.3139	2.41401	2.27772	2.11155	2.03763
314	2.03909	2.34529	2.30341	2.4339	2.15493	2.14423
315	1.80738	2.47712	2.05185	2.23283	2.05321	2.17412
316	2.00497	2.53976	2.01143	2.43204	2.26169	2.29426
317	1.94007	2.43884	2.24723	2.49712	2.15898	2.18001
318	2.01317	2.35211	2.34182	2.50907	2.19336	2.06847
319	2.01744	2.38997	2.34461	2.6033	2.06934	2.25053
320	2.02366	2.44329	2.25685	2.31417	2.26364	2.31843
321	1.99518	2.52273	2.04158	2.40625	2.45523	2.21845
322	2.01482	2.35992	2.19101	2.21315	2.1536	2.41753
323	1.78564	2.66294	2.17085	2.23979	2.11449	2.26612
324	1.89626	2.75461	2.17008	2.11505	2.00077	1.99748
325	1.85675	2.51828	2.50981	2.19232	2.16147	2.05257
326	2.02927	2.61089	2.01586	2.22333	2.24541	2.20517
327	2.01123	2.62969	2.23038	2.24929	2.26603	2.1306
328	2.02962	2.9022	2.08268	2.31696	2.14669	2.51117
329	1.98856	2.73624	2.00338	2.36619	2.12476	2.12376
330	2.19124	2.62891	1.90468	2.31876	2.11629	2.19293
331	2.20915	2.37852	1.87032	2.4043	2.00889	2.12857
332	2.17325	2.59929	1.99489	2.45507	2.11737	2.20639
333	2.22929	2.56344	1.98366	2.45512	2.03597	2.25302
334	2.16174	2.41047	1.99256	2.26094	1.9338	2.34958
335	2.01074	2.26486	2.05874	2.43653	1.94973	2.19854
336	2.20905	2.30245	2.30041	2.27793	1.87918	2.34657
337	2.44173	2.46139	2.07153	2.46342	1.8299	2.35836
338	2.22426	2.58244	1.96306	2.37887	1.75774	2.31466
339	2.20563	2.63116	1.98962	2.52311	1.86445	2.19062
340	2.25405	2.42249	2.06655	2.57845	1.96923	2.30156
341	2.07582	2.43064	2.17971	2.32549	1.9998	2.11245
342	1.85202	2.48082	2.17395	2.19858	1.92018	2.35221
343	1.99547	2.81235	2.16896	2.36341	2.02524	2.49212
344	2.02628	2.61034	2.08111	2.14579	1.96423	2.3501
345	2.1478	2.65668	2.08939	2.34027	1.8959	2.14006
346	1.98515	2.46883	2.15878	2.44327	1.91264	2.17691
347	2.02811	2.4061	2.1963	2.33878	2.0381	2.06001
348	1.94392	2.4652	2.14909	2.40014	1.99025	2.3306
349	1.93601	2.47993	2.34945	2.28895	1.82785	2.29115
350	1.88929	2.5867	2.23951	2.35435	1.97445	2.14673
351	1.86773	2.6383	2.19516	2.54486	1.9949	2.18181
352	1.94179	2.49663	2.24463	2.50653	1.97848	2.04092
353	2.0319	2.599	2.20052	2.64944	2.01883	2.0437
354	1.85551	2.50264	2.10028	2.40751	1.93528	2.05994
355	1.79031	2.49201	2.06449	2.49831	1.89055	1.96525
356	1.91109	2.40769	2.12097	2.68577	1.90321	1.94387
357	1.68772	2.53603	2.29147	2.73423	1.93618	1.92028
358	1.98782	2.54516	2.21962	2.41408	2.14557	1.91883
359	1.87266	2.57763	2.17727	2.51	1.89297	1.94943
360	1.9879	2.50989	2.11444	2.4373	1.89641	2.1112
361	2.01183	2.64952	2.06137	2.48469	1.88352	2.28139
362	1.96193	2.55323	2.20179	2.49256	1.87776	2.08219
363	2.09456	2.52214	2.28829	2.50332	1.95436	2.09962
364	2.16985	2.43048	2.27535	2.62766	1.98752	2.04951
365	2.14798	2.52876	2.15545	2.35005	1.80957	2.11973
366	2.26795	2.68544	2.24362	2.43835	1.82609	2.17799
367	2.18041	2.80365	2.21067	2.35594	1.86348	1.94519
368	2.09891	2.72391	2.15371	2.28829	1.91559	2.06271
369	2.19204	2.70787	2.03169	2.41331	1.76198	2.03441
370	2.18926	2.70174	2.2191	2.40804	1.89137	2.17743
371	2.06573	2.69825	2.15713	2.4054	1.81815	2.25907
372	1.77541	2.80018	2.25504	2.55603	1.6766	2.21867
373	2.17569	2.50221	2.24295	2.31048	1.75774	2.18737
374	2.04639	2.55734	2.0711	2.45617	1.84144	2.0896
375	2.10264	2.32303	2.21006	2.37752	1.85291	2.21394
376	2.08941	2.40301	1.98435	2.33388	1.81244	2.16408
377	2.25268	2.46656	2.23083	2.37306	1.81585	1.98986
378	2.08129	2.36291	2.25458	2.41048	1.81725	1.95651
379	2.06301	2.51007	2.26711	2.55374	1.80938	2.01118
380	2.21128	2.385	2.18298	2.4146	1.78481	2.38401
381	2.2454	2.38396	2.19332	2.39541	1.90706	2.17553
382	2.00745	2.36834	2.11099	2.42792	1.86855	1.99458
383	2.05411	2.59924	1.8975	2.49889	1.85221	2.0384
384	2.25118	2.47023	1.98904	2.49834	2.02123	2.19112
385	2.4501	2.51046	2.05872	2.47691	1.95396	1.87383
386	2.14384	2.68094	1.90393	2.38838	2.12687	2.10223
387	2.14878	2.72981	2.1057	2.46524	2.184	2.24708
388	2.03795	2.61327	2.06549	2.29817	1.95099	2.31405
389	2.11997	2.65376	1.9864	2.5384	1.98295	2.27817
390	2.04647	2.71878	2.32932	2.45354	1.92982	2.16143
391	2.22136	2.70789	2.38887	2.72163	1.76309	2.25658
392	1.98931	2.64571	2.40102	2.45595	2.0606	2.21732
393	2.01773	2.73227	2.29359	2.37131	1.99193	2.1659
394	1.96113	2.82162	2.28416	2.52002	1.87436	2.25786
395	1.74782	2.87536	2.33792	2.5494	1.82124	2.34521
396	1.74048	2.71162	2.31905	2.84476	1.8857	2.30423
397	1.74589	2.72474	2.28337	2.6904	1.97988	2.18811
398	1.79114	2.75821	2.33388	2.59921	1.9396	2.15196
399	1.80849	2.5639	2.1008	2.37415	2.01273	2.0687
400	1.82	2.6678	2.33668	2.44078	2.08176	2.07701
401	2.04922	2.62305	2.17013	2.58733	1.98567	2.03051
402	2.03746	2.73235	2.05635	2.35264	1.84729	2.32552
403	2.03754	2.85622	1.9901	2.49947	1.93795	2.18192
404	2.24959	2.86041	1.93175	2.39991	2.08937	2.05413
405	2.03083	2.71685	2.02763	2.67034	2.00143	2.14079
406	2.00857	2.83618	2.04987	2.52684	2.02327	2.26663
407	1.90096	2.74784	2.14178	2.40296	1.97724	2.14263
408	2.04382	2.82272	2.106	2.55707	2.0563	2.21242
409	2.19049	2.81759	2.17994	2.49677	1.94012	1.97944
410	2.25899	2.77728	2.23738	2.40806	2.00468	2.02223
411	2.06092	2.66244	2.10071	2.34999	1.90449	2.15389
412	2.30944	2.70743	2.2876	2.5255	1.93082	2.00205
413	2.23467	2.77327	2.56615	2.38799	1.78501	1.91232
414	2.28803	2.7221	2.45584	2.54023	1.84914	2.09595
415	2.46685	2.79204	2.22994	2.45694	1.79691	1.89516
416	2.04123	2.7826	2.19169	2.45922	1.6833	2.32484
417	2.13807	2.71077	2.1477	2.4547	1.73807	2.22541
418	2.08254	2.85609	2.32485	2.51485	2.0047	2.01336
419	2.12676	2.80494	2.21897	2.54366	1.82856	1.91965
420	2.19548	2.72111	2.13576	2.51949	1.84871	1.90057
421	2.34255	2.70985	2.19913	2.66662	1.93335	2.03233
422	2.40866	2.83086	2.38979	2.40908	1.96965	2.23533
423	2.18956	2.75851	2.37843	2.63149	2.08853	2.11242
424	1.84705	2.61223	2.0013	2.49967	2.05583	2.00867
425	2.23199	2.61206	2.12276	2.69628	2.09731	2.05897
426	2.16383	2.63066	2.03514	2.56503	1.97616	2.11009
427	2.06339	2.86452	2.05325	2.59753	1.98693	2.15308
428	2.22396	2.86463	2.32373	2.39967	1.95654	2.12805
429	2.21969	2.84769	2.51133	2.33435	2.04775	2.18055
430	2.1984	2.84335	2.54426	2.52373	2.05107	2.24883
431	2.18152	2.68223	2.66641	2.31353	2.11905	2.19148
432	2.13564	2.68527	2.34584	2.47082	2.21364	2.18924
433	1.94446	2.76262	2.45046	2.48177	1.89923	2.18626
434	1.91751	2.74733	2.48576	2.2578	1.71763	2.20511
435	2.09905	2.66446	2.33685	2.42848	1.82964	2.15894
436	2.39892	2.63009	2.6022	2.637	1.94462	2.05918
437	2.24685	2.78576	2.52532	2.39739	2.13323	1.93612
438	2.41034	2.85716	2.48081	2.5277	1.9534	1.99585
439	2.36625	2.58337	2.44498	2.51378	1.98724	1.91459
440	2.20349	2.67546	2.35276	2.49884	1.75452	2.05234
441	2.33092	2.51344	2.54172	2.35281	1.89497	1.90174
442	2.24946	2.42102	2.56276	2.41118	1.78846	1.97916
443	2.14621	2.71788	2.54527	2.39297	1.86998	2.00996
444	2.18162	2.56912	2.22505	2.65519	1.74736	2.0484
445	2.0262	2.52725	2.31922	2.57965	1.92662	2.12891
446	2.03163	2.62922	2.41154	2.58607	1.95817	1.94219
447	1.94679	2.4678	2.4176	2.55631	1.94188	1.88662
448	2.18993	2.578	2.2925	2.55508	1.87974	1.88437
449	1.94069	2.66081	2.54539	2.55954	1.87971	1.9037
450	1.82	2.6678	2.33668	2.44078	2.08176	2.07701
451	2.04922	2.62305	2.17013	2.58733	1.98567	2.03051
452	2.03746	2.73235	2.05635	2.35264	1.84729	2.32552
453	2.03754	2.85622	1.9901	2.49947	1.93795	2.18192
454	2.24959	2.86041	1.93175	2.39991	2.08937	2.05413
455	2.03083	2.6685	2.02763	2.67034	2.00143	2.14079
456	2.00857	2.83618	2.04987	2.52684	2.02327	2.26663
457	1.90096	2.94784	2.14178	2.40296	1.97724	2.14263
458	2.04382	2.82272	2.106	2.55707	2.0563	2.21242
459	2.19049	2.81759	2.17994	2.49677	1.94012	1.97944
460	2.25899	2.77728	2.23738	2.40806	2.00468	2.02223
461	2.06092	2.66244	2.10071	2.34999	1.90449	2.15389
462	2.30944	2.70743	2.2876	2.5255	1.93082	2.00205
463	2.23467	2.67327	2.56615	2.38799	1.78501	1.91232
464	2.28803	2.82221	2.45584	2.54023	1.84914	2.09595
465	2.46685	2.79204	2.22994	2.45694	1.79691	1.89516
466	2.04123	2.7826	2.19169	2.45922	1.6833	2.32484
467	2.13807	2.71077	2.1477	2.4547	1.73807	2.22541
468	2.08254	2.95609	2.32485	2.51485	2.0047	2.01336
469	2.12676	2.80494	2.21897	2.54366	1.82856	1.91965
470	2.19548	2.82111	2.13576	2.51949	1.84871	1.90057
471	2.34255	2.70985	2.19913	2.66662	1.93335	2.03233
472	2.40866	2.83086	2.38979	2.40908	1.96965	2.23533
473	2.18956	2.75851	2.37843	2.63149	2.08853	2.11242
474	1.84705	2.61223	2.0013	2.49967	2.05583	2.00867
475	2.23199	2.61206	2.12276	2.69628	2.09731	2.05897
476	2.16383	2.63066	2.03514	2.56503	1.97616	2.11009
477	2.06339	2.86452	2.05325	2.59753	1.98693	2.15308
478	2.22396	2.86463	2.32373	2.39967	1.95654	2.12805
479	2.21969	2.84769	2.51133	2.33435	2.04775	2.18055
480	2.1984	2.84335	2.54426	2.52373	2.05107	2.24883
481	2.18152	2.68223	2.66641	2.31353	2.11905	2.19148
482	2.13564	2.68527	2.34584	2.47082	2.21364	2.18924
483	1.94446	2.76262	2.45046	2.48177	1.89923	2.18626
484	1.91751	2.74733	2.48576	2.2578	1.71763	2.20511
485	2.09905	2.66446	2.33685	2.42848	1.82964	2.15894
486	2.39892	2.63009	2.6022	2.637	1.94462	2.05918
487	2.24685	2.78576	2.52532	2.39739	2.13323	1.93612
488	2.41034	2.85716	2.48081	2.5277	1.9534	1.99585
489	2.36625	2.58337	2.44498	2.51378	1.98724	1.91459
490	2.20349	2.67546	2.35276	2.49884	1.75452	2.05234
491	2.33092	2.51344	2.54172	2.35281	1.89497	1.90174
492	2.24946	2.42102	2.56276	2.41118	1.78846	1.97916
493	2.14621	2.71788	2.54527	2.39297	1.86998	2.00996
494	2.18162	2.56912	2.22505	2.65519	1.74736	2.0484
495	2.0262	2.52725	2.31922	2.57965	1.92662	2.12891
496	2.03163	2.62922	2.41154	2.58607	1.95817	1.94219
497	1.94679	2.4678	2.4176	2.55631	1.94188	1.88662
498	2.18993	2.578	2.2925	2.55508	1.87974	1.88437
499	1.94069	2.66081	2.54539	2.55954	1.87971	1.9037
Avarage RMSD	2.08206	2.4912	1.97962	2.28252	1.89703	2.06844

## Sheet: Thymidine
	CHEMBL3674540	CHEMBL1683320	CHEMBL391279	ZINC000031750813	CHEMBL4078273	Thymidine kinase
0	0	2.59557e-07	0	0	2.59557e-07	5.9472e-07
1	1.07427	1.13479	1.10543	1.20854	1.08911	1.17877
2	1.55608	1.21738	1.53878	1.25963	1.38434	1.22991
3	1.24411	1.56006	1.19668	1.36075	1.65147	1.56541
4	1.52244	1.40761	1.39022	1.53752	1.70616	1.65872
5	1.18728	1.47414	2.11065	1.68135	1.458	1.73948
6	1.17655	1.49184	1.81393	1.6768	1.67864	1.83155
7	1.61805	1.83979	1.8695	1.80446	1.5637	2.13915
8	1.46923	1.82795	1.80679	1.86986	1.69142	1.70942
9	1.84398	1.8114	2.03866	1.95674	1.69744	1.66911
10	1.89718	2.1106	1.93932	1.8159	1.7578	2.06283
11	1.7082	1.94182	1.64316	1.77096	2.03208	1.95474
12	1.5437	1.91713	1.97194	2.29754	1.77968	2.01893
13	1.49191	2.04113	2.07938	1.95562	2.00409	2.42735
14	1.63125	2.10191	1.9835	2.16033	2.16465	2.22961
15	1.55638	2.08067	1.9873	2.37256	2.11211	2.24272
16	1.83192	2.20523	2.06641	2.05061	2.3201	2.08862
17	1.51239	2.07944	1.80936	2.03544	2.25018	1.95466
18	1.58196	1.8378	1.9038	2.39059	2.65966	1.6223
19	1.49296	2.02072	2.01382	2.29141	3.04105	1.76266
20	1.92565	1.92587	2.10276	2.37508	2.9999	1.8043
21	1.75045	1.82408	2.13886	2.24745	2.84229	1.80168
22	1.64595	1.73169	1.75904	2.42735	2.8137	1.89736
23	2.02889	1.89518	1.74339	2.41488	2.94311	1.84409
24	2.33681	1.82045	1.75943	2.81463	3.0808	2.18044
25	2.01825	1.82727	1.95468	2.62496	3.18432	2.07477
26	1.97608	2.11571	1.82531	2.81603	3.1333	1.93626
27	2.00528	1.88468	1.86184	2.54371	2.50014	1.69657
28	1.97647	1.96061	1.95585	2.86466	3.0277	1.79446
29	2.00592	1.92158	1.92271	2.64173	2.87336	1.67668
30	1.74162	1.9943	1.86655	2.72644	2.68477	1.48468
31	1.82386	1.97052	1.82702	2.91879	2.67968	1.46712
32	1.96043	2.05594	1.8764	2.95254	2.85758	1.28591
33	1.94759	2.16757	1.85099	2.90742	2.86271	1.54153
34	2.10756	2.2258	1.8174	2.36133	2.93107	1.82792
35	1.67681	2.31599	2.16557	2.93706	2.76178	1.49457
36	1.87988	2.40948	1.88686	2.76067	2.70626	1.34045
37	1.88701	2.09429	1.7407	3.11729	2.80074	1.48002
38	1.96344	2.01249	1.80619	3.31365	2.67763	1.55979
39	1.95745	2.33783	1.71759	3.07636	2.7477	1.4983
40	1.99213	2.15536	1.72483	2.77341	2.69449	1.81159
41	2.12776	2.34982	1.94422	2.77103	2.73434	1.59389
42	2.09361	1.9949	1.71891	2.77568	2.49509	1.58703
43	2.26914	2.10357	1.94627	3.0662	2.89751	1.87819
44	2.01033	2.19137	2.0938	3.15399	3.1102	1.69588
45	1.97742	2.26196	2.06465	3.31806	3.004	1.75766
46	2.16437	2.22603	2.30271	3.35823	2.85963	1.6775
47	2.05702	2.26047	2.20813	3.15099	2.57023	1.65581
48	2.06866	2.22137	2.27864	3.48394	2.68716	1.67511
49	2.07078	2.03814	2.28909	3.4568	2.40585	1.66748
50	2.16973	1.99034	2.20987	3.46603	2.73759	1.68169
51	2.01594	2.12647	2.02572	3.40561	2.56325	1.71062
52	2.03637	2.22024	2.23992	3.55013	2.24097	1.83372
53	2.0156	2.10593	2.12476	3.59861	2.38759	1.7785
54	1.96115	2.02324	2.01003	3.58746	2.43167	1.71892
55	1.99875	1.93656	2.17643	3.14282	2.56853	1.73844
56	1.95163	2.20334	2.04166	3.61945	2.13948	1.84516
57	1.8803	2.02105	1.87301	4.39178	2.18659	1.96707
58	2.11637	2.17851	2.28415	4.37683	2.64683	1.9161
59	1.69551	2.20858	1.97946	4.71163	2.46694	1.90946
60	1.89606	2.21478	2.06627	4.54022	2.50595	1.93579
61	1.79656	2.35801	2.17366	4.73784	2.47801	1.76597
62	2.05137	2.31316	2.0404	4.07772	2.66646	2.03236
63	1.81105	2.38033	2.11906	3.9855	2.7066	1.82481
64	1.98577	2.40883	2.21866	3.78672	2.52389	1.8338
65	1.86115	2.26556	2.37682	3.72158	2.78058	1.78148
66	2.03705	2.3407	2.13848	3.84522	2.64483	1.93389
67	1.95482	2.46613	2.10391	3.98921	2.60213	2.0295
68	1.94384	2.31779	2.13121	4.03528	2.7769	1.651
69	2.14302	2.37563	2.18554	3.79741	2.83826	1.64115
70	1.91832	2.25357	2.3958	4.52816	2.59183	1.95199
71	1.9986	2.17925	2.44839	4.50533	2.80917	1.71552
72	2.1405	2.49545	2.45641	4.98462	2.55209	1.79593
73	2.16787	2.3565	2.35898	5.28666	2.65744	1.97261
74	2.25775	2.22432	1.88603	5.43195	2.74224	1.84898
75	2.14674	2.30664	2.02382	5.67777	2.64926	1.82969
76	2.17234	2.40173	1.95733	5.57785	2.78372	2.00254
77	2.28282	2.18036	2.1746	5.97495	2.78002	1.84778
78	2.23068	2.22189	1.96316	6.22181	2.62176	1.95474
79	2.27788	2.47176	2.1449	6.55684	2.66535	1.94797
80	2.14064	2.49214	2.23133	5.85087	2.57724	1.92354
81	2.02213	2.294	2.39783	6.63466	2.7517	1.95165
82	2.04571	2.27073	2.41118	6.75962	2.54355	2.13917
83	2.00736	1.87601	2.17766	5.45176	2.67598	1.91685
84	2.16277	2.25039	2.30799	5.1141	2.67297	1.85901
85	2.13391	2.27896	2.34013	5.21726	2.55154	1.68376
86	2.1103	2.59249	2.17134	5.37079	2.50671	1.87931
87	2.21922	2.75048	2.22403	5.7533	2.8249	1.72239
88	2.32291	2.5724	2.04283	5.86059	2.65494	1.75774
89	2.31534	2.54054	2.178	5.90356	2.59641	1.58629
90	2.51774	2.27597	2.27337	6.36287	2.68843	1.52491
91	2.60127	2.35336	2.25363	6.09	2.71626	1.55077
92	2.76905	2.58374	2.02401	5.65664	2.77838	1.65405
93	2.4765	2.56251	1.74657	5.48971	2.88409	1.8002
94	2.33856	2.47536	1.9294	5.54222	2.58987	1.91808
95	2.38477	2.61112	1.9191	5.12691	2.76706	1.86604
96	2.13694	2.51388	1.99887	5.43308	2.88073	2.11089
97	2.25172	2.48613	1.78415	5.3682	2.85853	1.91226
98	2.08445	2.34405	1.91982	5.6831	2.8604	1.99508
99	2.1086	2.40403	1.90496	5.82184	2.98419	2.03871
100	1.99915	2.85921	2.02085	6.47091	2.68185	2.02221
101	2.13162	2.68096	1.99486	6.3798	2.93613	1.86823
102	2.12446	2.53198	2.18624	7.39735	2.95767	1.86098
103	2.14011	2.73562	2.13365	7.23375	2.80917	1.60498
104	1.90413	2.73546	2.04548	8.15769	2.96425	1.9147
105	2.01285	2.45113	2.01463	7.27547	3.14425	1.76261
106	1.95521	2.44823	2.0179	6.5231	3.0385	1.90037
107	1.99276	2.60402	1.94547	6.61812	3.16425	1.92786
108	1.83619	2.47981	2.15184	6.34406	2.7017	1.88521
109	1.75685	2.34889	2.27102	6.6022	2.86046	1.6274
110	1.86284	2.38527	2.31932	6.81076	3.16366	1.76235
111	2.22956	2.35045	2.29198	7.00289	3.08525	1.99115
112	2.0311	2.40902	2.04428	6.53408	3.00511	1.84141
113	2.19135	2.37406	2.31255	6.38959	2.96267	1.87947
114	1.78151	2.39385	2.45827	6.11937	3.29132	1.97831
115	1.84081	2.47012	2.37526	6.27327	2.91971	1.92523
116	2.29571	2.64399	2.25831	6.2055	2.99857	1.8313
117	1.85251	2.47069	2.36488	6.30747	3.3923	1.8632
118	2.07095	2.52467	2.42876	6.13935	3.48925	2.09688
119	2.17796	2.75665	2.28185	6.63266	3.4381	1.92628
120	2.13507	2.70709	2.27818	6.61955	3.31412	2.01621
121	1.89746	2.75181	2.28189	7.25802	3.21877	1.95649
122	1.97344	2.73658	2.30799	7.28114	3.17704	2.09542
123	1.69879	2.52743	2.03879	6.59052	3.08505	1.88194
124	1.8703	2.59531	1.98602	7.13648	3.18605	1.93908
125	2.1139	2.56366	2.27687	7.0874	3.17954	2.06589
126	1.9099	2.37025	2.12246	6.84895	3.24677	2.17769
127	2.0457	2.62059	2.37645	6.41397	3.07207	1.98651
128	2.12701	2.60149	2.2268	6.62574	3.09716	1.78452
129	2.23044	2.77874	2.24207	6.80688	3.3676	1.77537
130	1.91932	2.68522	2.07806	7.38872	3.32148	1.9066
131	1.93329	2.74083	2.2161	6.79558	3.03117	1.80688
132	1.9585	2.80484	2.26453	6.4426	2.76452	1.66429
133	2.19294	2.73222	2.0762	7.01591	3.28326	1.68424
134	1.93974	2.8472	2.36193	7.08213	3.15548	1.76104
135	1.92016	2.70214	2.31185	6.87167	3.04962	1.82437
136	2.18182	2.77158	2.317	5.47519	3.1935	1.62252
137	2.04094	2.76455	2.30356	6.31642	3.1258	1.82715
138	2.15218	2.69463	2.1013	6.4928	2.96564	1.82873
139	2.07071	2.57853	2.00831	6.12568	2.85441	2.04819
140	2.11238	2.77208	2.00174	5.61066	3.05502	1.87445
141	2.00799	2.62894	2.01445	5.60123	2.82962	1.8828
142	2.22902	2.70753	2.01629	5.63914	2.87065	1.99375
143	2.40098	2.92636	2.00054	5.30296	2.82243	1.9872
144	2.22556	2.88956	1.99944	5.5991	2.88616	1.79964
145	2.09729	2.88794	1.96101	5.18266	2.93075	1.9848
146	2.421	2.79754	2.0928	5.88555	2.904	2.0483
147	2.27489	2.89515	2.14843	5.97545	2.95352	1.89915
148	2.03034	2.61605	2.01743	6.76301	2.98372	1.93818
149	2.18062	2.72043	2.12572	7.30008	2.79912	2.18123
150	2.15929	2.70364	2.23751	7.95327	2.98127	1.90681
151	1.84573	2.70058	2.01874	8.00829	3.10183	2.00122
152	2.10837	3.00558	2.22188	7.30935	2.96595	1.98997
153	2.22632	2.96059	2.28902	7.39264	3.05169	2.02097
154	2.20182	2.84546	2.17268	7.45883	3.22394	1.95586
155	2.59938	2.77283	2.44853	7.66944	2.84104	1.8685
156	2.35772	2.86309	2.15808	8.18018	3.01474	1.71593
157	2.18066	2.85156	2.09753	8.35005	3.10686	2.02814
158	1.99837	2.85897	2.13987	8.16109	3.17398	1.76827
159	1.88275	2.9178	2.07518	8.60946	3.08153	1.89741
160	1.71698	2.95904	2.03353	8.01279	3.11039	2.00779
161	1.96761	2.85067	2.14928	7.38221	2.96065	1.84212
162	1.83528	2.88102	2.23305	6.94371	2.8911	1.84228
163	1.765	2.78615	2.20372	6.27935	3.19981	1.83213
164	1.88837	2.92674	2.0257	6.2182	3.39105	2.01656
165	2.04263	2.9428	2.09354	5.99904	3.16675	1.92935
166	2.32656	2.93755	2.04423	6.62002	3.11961	1.90358
167	2.19533	2.89022	2.0464	6.39346	3.1488	2.14789
168	2.26341	2.97316	2.07093	5.96008	3.24182	2.1456
169	2.08507	3.0027	2.00904	5.71842	3.19354	2.33047
170	2.06414	2.997	2.07657	6.3591	3.25924	2.31063
171	2.08959	2.95522	2.12432	5.49963	3.37007	2.12523
172	2.07912	2.97136	2.0425	6.29904	3.24553	1.94825
173	2.03827	2.88585	2.15389	6.22135	2.92894	1.83457
174	2.04868	2.77242	2.1534	7.00357	3.00825	2.11836
175	2.31663	2.86118	2.20054	7.0145	3.19813	2.0097
176	2.2368	2.75871	2.04258	7.91386	3.02778	2.24446
177	2.24678	2.63694	2.18472	7.77684	3.00543	2.31471
178	2.07547	2.77372	2.12692	7.67081	3.07171	2.15298
179	2.27029	2.79405	2.15539	7.83896	3.00161	2.27697
180	2.12715	2.66386	2.23239	8.85192	3.16837	1.94468
181	2.05911	2.72463	2.17424	9.43766	3.38667	2.03493
182	2.17759	2.76173	2.1651	9.16362	3.27025	1.89566
183	2.11908	2.91214	2.19264	9.13043	3.35634	1.78613
184	2.02481	2.76663	2.19765	8.93293	3.36263	1.92398
185	2.20656	2.8591	2.2582	9.05927	3.49867	2.18251
186	2.01943	2.76529	2.23245	9.83405	3.56353	2.18648
187	2.08791	2.88853	2.29069	10.0953	3.30837	2.26413
188	2.14588	2.95368	2.08037	9.63927	3.46478	1.79872
189	2.15967	3.02137	2.10476	9.88046	3.37523	1.90245
190	2.27019	3.07335	2.13371	9.60875	3.54115	1.82737
191	2.21467	2.82061	2.03978	10.0967	3.37211	1.76885
192	2.35975	2.68518	2.25326	10.0379	3.56915	1.74452
193	2.30344	2.75408	2.25195	9.29969	3.58905	1.90168
194	2.24873	2.5149	2.11582	9.38126	3.65511	2.11568
195	2.51225	2.64351	2.21756	9.37285	3.48347	1.87637
196	2.18055	2.71208	2.02963	9.39669	3.38901	2.03104
197	2.17966	2.65674	2.15883	9.3096	3.39319	1.81343
198	2.15715	2.73799	2.18382	9.83924	3.44054	2.05936
199	2.13265	2.69085	2.08617	9.8823	3.46905	2.15813
200	2.12469	2.69072	2.10626	10.6478	3.51848	2.01422
201	1.93698	2.56481	2.05266	10.3328	3.49104	1.91351
202	2.00717	2.40438	1.94178	10.3721	3.50473	2.20288
203	1.92398	2.43767	1.94564	10.1467	3.34123	2.16428
204	1.99132	2.49695	1.99176	10.1456	3.49558	2.21996
205	2.14519	2.71573	1.95725	10.8826	3.45212	2.42853
206	2.43162	2.72149	1.83545	10.9646	3.5814	2.20304
207	2.19846	2.69606	1.83761	10.8164	3.523	2.11744
208	2.06105	2.69419	1.96047	11.0668	3.65	2.19447
209	2.17119	2.64579	1.98506	10.5622	3.58089	2.14971
210	2.17496	2.66213	2.08192	10.4335	3.52113	2.04502
211	2.10375	2.60639	1.95804	11.0442	3.64195	2.0707
212	2.33765	2.48443	2.08994	11.4484	3.47581	2.0835
213	2.3157	2.5051	2.00096	10.7827	3.62734	2.33032
214	2.39341	2.70543	1.91488	10.8078	3.54458	2.20235
215	2.29461	2.65169	2.16245	10.5591	3.50376	2.37018
216	2.39531	2.87913	2.13954	10.5714	3.58221	2.26643
217	2.17882	2.58607	1.97069	9.5489	3.48038	2.13637
218	2.51448	2.59061	2.14201	10.4368	3.67148	2.1234
219	2.32295	2.6496	2.13229	10.173	3.46294	2.13924
220	2.35287	2.45442	2.05009	9.99802	3.692	1.96641
221	2.32189	2.81026	2.12705	10.51	3.67939	1.79493
222	2.11445	2.83862	2.1948	10.3959	4.10411	1.71536
223	2.33142	2.78969	2.15317	10.2321	3.95319	1.57364
224	2.2777	2.80926	2.28996	10.4891	3.93574	1.70429
225	2.19714	2.75527	2.54994	10.3686	4.02927	1.91152
226	2.24815	2.84544	2.44598	9.74064	4.04727	2.09594
227	2.00471	2.78754	2.44475	10.1627	3.80887	1.94804
228	2.09165	2.73882	2.36917	10.5675	3.89902	1.86611
229	1.89394	2.89416	2.34162	11.1178	4.00662	2.17698
230	2.02266	2.88637	2.3013	11.4427	3.92007	1.86986
231	2.07235	2.857	2.3596	10.7548	3.78645	1.92243
232	2.26929	2.49614	2.47284	10.82	3.78922	2.10855
233	2.13537	2.49023	2.24683	10.7497	3.77271	2.25809
234	2.08794	2.48328	2.17996	10.4181	3.95103	2.18735
235	2.11917	2.36702	2.23178	9.98356	3.62663	2.15081
236	1.97939	2.59519	2.24339	10.3835	3.74068	1.859
237	2.08819	2.40042	2.07873	9.89584	3.97166	1.83388
238	2.30943	2.67345	2.14775	10.0439	3.69467	1.83002
239	2.3666	2.56898	2.00638	9.49765	3.837	1.87151
240	2.42482	2.83767	2.30789	9.3474	3.45977	1.94619
241	2.5258	2.92513	2.44827	9.67011	3.48728	1.81177
242	2.39475	2.93058	2.3499	10.1389	3.45253	1.67542
243	2.2727	2.99039	2.39149	10.1599	3.77324	1.69674
244	2.11457	2.8837	2.2946	9.80813	3.8119	1.84219
245	2.05666	2.93874	2.29457	9.73134	3.76932	1.92279
246	2.61073	3.15559	2.11045	9.70788	3.85637	2.39238
247	2.228	3.02245	2.21012	10.287	3.57586	2.15929
248	2.13405	2.9107	2.51864	10.6888	3.55496	1.85339
249	2.46215	2.78415	2.23842	10.2857	3.34908	1.91059
250	2.33721	3.03075	2.38829	10.4026	3.60997	2.17868
251	2.46538	2.83319	2.30762	10.1115	3.706	1.92462
252	2.35889	2.56248	2.15774	9.6966	3.73709	1.91974
253	2.50466	2.75381	2.07793	10.1084	3.5616	2.04713
254	2.41397	2.6887	2.2658	10.9843	3.66363	1.83826
255	2.47465	2.86306	2.18214	11.3787	3.69154	1.95889
256	2.33923	2.67501	1.8711	10.9268	3.74219	2.16315
257	2.18811	2.6337	1.93895	11.3455	3.62493	2.23132
258	2.24329	2.74993	1.94294	10.9045	3.81736	1.92161
259	2.41031	2.82988	2.10866	10.9256	3.77411	1.84308
260	2.56081	2.75211	2.13395	11.2201	3.79107	1.99353
261	2.40341	2.5983	2.2222	10.9606	3.65887	1.86691
262	2.81894	2.76893	2.16144	11.0156	3.94386	2.05498
263	2.72731	2.72875	2.07659	10.9887	4.194	2.10302
264	2.55615	2.66247	2.10268	10.7637	4.09491	1.98971
265	2.34861	2.52814	2.16456	10.7459	4.04748	2.18898
266	2.44266	2.58809	2.03799	10.679	3.96232	2.01687
267	2.35341	2.78404	2.19248	11.2095	4.1825	2.10239
268	2.40508	2.48557	2.34476	10.8398	4.24059	2.14909
269	2.50306	2.45717	2.12643	10.7043	3.92066	2.11946
270	2.86766	2.28612	2.08349	10.2663	3.91758	1.97563
271	2.72784	2.28393	1.95217	10.6566	3.98811	2.00414
272	2.54779	2.33383	1.86286	10.1741	3.8415	1.93765
273	2.68678	2.24465	1.95146	10.5853	3.82734	2.14636
274	2.57284	2.49052	1.96983	10.456	3.87735	2.12636
275	2.34017	2.19098	2.04516	9.98886	4.11589	2.22906
276	2.09233	2.34682	2.05617	9.83229	3.81963	2.09327
277	2.45317	2.29277	1.97222	9.11453	3.76871	1.99795
278	2.47584	2.31914	2.22093	9.95567	3.89024	2.08282
279	2.41265	2.56289	1.99097	9.55094	3.94318	2.12326
280	2.59013	2.32268	1.95586	9.57634	3.89447	2.2477
281	2.49896	2.5447	1.69762	9.46424	3.72912	2.19754
282	2.44071	2.5657	1.74033	9.09338	3.8015	2.11026
283	2.55986	2.59608	1.96539	9.24901	3.80504	2.27258
284	2.65977	2.42148	2.13239	9.47701	3.87101	2.16644
285	2.76229	2.59757	2.26831	9.83098	3.86623	2.1792
286	2.69919	2.29866	2.3279	9.46945	3.78505	2.39266
287	2.71852	2.40707	2.0415	9.37695	3.69548	2.21471
288	2.52806	2.39095	2.24831	8.63335	3.67327	2.1475
289	2.71632	2.49723	2.22831	8.46488	3.73465	2.25219
290	2.90148	2.34831	2.21804	7.65694	3.81401	2.22486
291	2.65936	2.5818	2.21138	7.2107	3.88405	2.30285
292	2.67916	2.45696	2.0605	7.07318	3.8445	2.51965
293	2.64041	2.46546	1.96722	7.01984	3.8514	2.44238
294	2.59464	2.59586	1.96893	6.59888	3.69243	2.30687
295	2.75036	2.57594	1.78893	6.93454	3.86488	2.47065
296	2.74549	2.52206	1.9923	6.72677	3.76173	2.4566
297	2.72834	2.65138	1.96304	6.45668	3.81128	2.58097
298	2.66624	2.63554	2.00584	5.59741	3.78468	2.69983
299	2.76608	2.65374	1.95625	5.17678	3.66598	2.58473
300	2.63434	2.90568	1.77982	5.13391	3.78559	2.52348
301	2.7884	2.64689	1.98301	5.0866	3.63006	2.41783
302	2.69776	2.61071	2.03232	5.02038	3.8917	2.3975
303	2.65534	2.70116	1.76999	5.29489	4.18061	2.42241
304	2.72667	2.57645	2.05783	5.28816	4.053	2.31185
305	2.72969	2.63205	1.93357	5.59494	3.88258	2.5859
306	2.80995	2.57773	1.88517	5.33788	3.85175	2.35711
307	2.66295	2.6187	1.97507	5.51492	4.12863	2.61577
308	2.61701	2.46289	1.94926	5.56992	4.18881	2.64215
309	2.7795	2.50846	1.86741	5.26084	3.96765	2.55331
310	2.52857	2.56038	1.89684	6.10275	4.07936	2.37768
311	2.58475	2.59104	2.04045	5.85758	4.10642	2.6907
312	2.84512	2.47853	2.0213	6.60797	3.78237	2.48425
313	2.88409	2.49365	2.00357	7.38391	3.79108	2.36432
314	2.00158	2.55014	1.96902	7.1978	3.7924	2.33237
315	2.7473	2.61668	2.00399	7.65634	3.85503	2.5228
316	2.77831	2.46632	1.98405	7.38458	3.65914	2.63865
317	2.90679	2.44499	2.05433	6.96695	3.82546	2.74204
318	2.9432	2.62444	1.87297	7.05914	3.84107	2.65599
319	2.71007	2.42029	2.12689	7.28834	3.79979	2.87986
320	2.7796	2.48985	2.21205	6.23139	4.14942	3.05691
321	2.80945	2.57108	2.00621	6.54895	4.20828	2.95411
322	2.7098	2.55209	1.99983	6.37686	4.46585	3.04255
323	2.88768	2.6392	1.98064	6.59163	4.53456	3.25804
324	2.74138	2.59921	1.9615	6.29906	4.32127	3.08892
325	2.77097	2.72283	1.8584	6.5735	4.30175	3.11116
326	2.82917	2.62218	1.9532	6.00537	4.19765	2.91327
327	2.60308	2.86044	1.93715	6.08857	4.06076	2.83588
328	2.37931	2.72538	2.06017	5.7004	4.33008	3.12552
329	2.21312	2.59533	1.88746	5.45463	4.0461	2.91334
330	2.29752	2.52499	2.1541	5.63878	4.04159	2.75187
331	2.23814	2.46314	1.90297	5.78347	4.23824	2.71151
332	2.36207	2.55607	1.82172	5.89767	3.90657	2.68835
333	2.19691	2.71338	1.93886	6.06936	4.03864	2.56163
334	2.20579	2.48428	2.03064	6.28639	4.1395	2.82718
335	2.21468	2.6281	2.0037	5.95015	4.08833	3.04972
336	2.39284	2.50475	1.99834	6.40228	4.01983	2.80559
337	2.5271	2.51499	1.94837	7.066	4.23102	2.67422
338	2.82032	2.67677	1.9289	7.05467	4.25392	2.76499
339	2.65259	2.65563	1.87774	6.71408	4.07649	3.08887
340	2.52478	2.73055	2.10966	6.93066	4.16404	2.91167
341	2.47335	2.50862	1.97112	6.32977	4.17084	3.2262
342	2.31538	2.53102	1.97435	6.10756	4.15052	3.25852
343	2.44643	2.55991	1.97658	6.17363	4.02506	3.20855
344	2.65116	2.67718	1.94347	5.64813	4.10548	3.28067
345	2.89946	2.54502	1.95672	5.64147	4.17781	3.18487
346	2.71991	2.82249	2.18735	5.62545	4.1682	2.99965
347	2.78028	2.76879	1.98394	5.70753	4.16256	2.93807
348	2.59264	2.64319	1.89008	6.72946	4.09147	2.92055
349	2.36482	2.66334	1.81294	6.15032	4.0065	3.08232
350	2.57083	2.76792	2.01413	5.87468	3.90695	2.82757
351	2.62128	2.93663	2.17526	5.63753	3.84982	2.85759
352	2.69936	2.93833	2.2378	5.28879	3.96013	3.00458
353	2.71131	2.83217	2.14488	5.17451	4.01888	2.99524
354	2.80583	2.50502	2.14274	5.18635	4.05225	2.8756
355	2.80736	2.62901	2.09727	5.32011	3.92659	3.06661
356	2.71835	2.71685	2.09409	4.80649	3.94873	2.96334
357	2.73218	2.5656	2.14673	5.53748	3.95442	2.8713
358	2.80806	2.55397	2.11023	5.60756	3.94241	2.78869
359	2.74683	2.75299	2.02097	5.92944	4.02797	3.03284
360	2.65303	2.67618	2.15182	5.28297	4.08574	3.06899
361	2.62571	2.76185	2.05303	4.64603	4.01971	3.14508
362	2.72776	2.76367	1.99747	4.84296	4.27549	3.1859
363	2.68606	2.86485	2.05787	5.51582	4.29574	3.21192
364	2.76559	2.64626	2.18912	5.8918	4.13682	3.25017
365	2.71436	2.80298	2.1479	6.97965	4.1048	3.2693
366	2.60151	2.8209	1.9669	6.31371	4.15704	3.20925
367	2.82121	2.75053	1.9901	6.74673	4.06401	3.30863
368	2.60147	2.8036	1.91193	6.97293	3.99749	2.94335
369	2.89461	2.8624	1.96867	6.85253	4.00333	3.31088
370	2.8319	2.7787	2.12489	6.82589	3.89274	3.33607
371	2.64423	2.81814	2.03368	6.37419	3.87833	3.20975
372	2.72556	2.77904	2.10754	6.55905	4.0734	3.27252
373	2.69983	2.27175	2.2618	5.9247	4.11799	3.24216
374	2.78793	2.48675	2.08283	5.79516	4.02811	3.2375
375	2.69968	2.41833	2.19687	5.65112	4.16271	3.28494
376	2.65163	2.51358	2.30561	6.22353	3.9629	3.18249
377	2.57929	2.58466	2.45413	5.80999	4.00676	3.28743
378	2.76956	2.49021	2.2009	5.62899	4.05066	2.95834
379	2.48615	2.65247	2.23121	6.00791	4.26722	3.16717
380	2.70651	2.6228	2.29821	6.04811	4.21471	3.17231
381	2.82398	2.73917	2.39459	5.55068	4.06924	2.82921
382	2.64668	2.56086	2.33608	5.45478	4.10873	3.34824
383	2.61276	2.65216	2.30643	5.358	4.15228	3.26252
384	2.80222	2.476	2.35375	4.62034	4.20497	3.56443
385	2.72329	2.69779	2.36402	5.26907	4.17714	3.24948
386	2.79156	2.46984	2.31463	4.75046	4.10507	3.58516
387	2.77882	2.66129	2.10488	4.57569	4.25393	3.64648
388	2.65516	2.43567	2.21807	4.87909	4.24899	3.5354
389	2.69076	2.63594	2.19088	4.76137	4.06915	3.48364
390	2.64294	2.52384	2.04751	4.57555	4.18506	3.57045
391	2.60592	2.4973	2.00843	4.49462	4.17595	3.41449
392	2.80064	2.61252	2.10674	4.63551	4.02841	3.53787
393	2.65952	2.70188	2.20199	5.44494	4.15542	3.38896
394	2.70396	2.69114	2.35398	5.32093	4.20026	3.22403
395	2.16497	2.56121	2.0632	5.75928	4.21567	3.54235
396	2.78336	2.66968	2.02309	5.61918	3.80246	3.37053
397	2.64546	2.65243	2.06861	6.1796	3.97568	3.51047
398	2.72721	2.63671	2.17474	6.33775	4.14467	3.56448
399	2.73358	2.62049	2.19406	6.28473	4.02226	3.82686
400	2.6524	2.57984	2.05722	6.30161	4.06256	3.70547
401	2.66827	2.61169	2.07821	7.0278	3.93169	4.12014
402	2.73732	2.31368	1.96528	7.11296	3.92256	3.65586
403	2.85916	2.64307	2.08182	6.9789	3.89305	3.81224
404	2.77765	2.46024	2.00157	6.5058	4.08905	3.96395
405	2.68246	2.47726	2.07089	6.91877	4.22725	4.11915
406	2.61405	2.50959	2.12786	7.19005	4.01468	4.22409
407	2.76479	2.40089	2.22762	7.13879	3.95945	3.96841
408	2.82431	2.37366	2.13071	7.53176	3.96536	3.66961
409	2.80959	2.42707	2.1043	6.66574	4.01912	3.51031
410	2.76278	2.17379	2.10147	7.15421	3.88831	3.28499
411	2.78993	2.26466	2.21221	7.79894	3.99069	3.33574
412	2.7643	2.56475	2.14674	8.04074	4.08314	3.47113
413	2.43267	2.33276	2.02014	8.25343	3.8017	3.5168
414	2.30428	2.28099	2.11166	7.64976	3.94107	3.66495
415	2.67741	2.35468	2.19069	7.63898	4.01534	3.2039
416	2.68846	2.27319	1.98246	8.20539	3.95696	3.08764
417	2.57892	2.54264	1.99193	7.8054	4.05283	3.31022
418	2.46959	2.40306	1.98556	7.94303	4.16516	3.12777
419	2.39352	2.53072	1.90939	7.19342	4.01378	3.39205
420	2.23572	2.6735	2.14135	7.25474	4.14714	3.27518
421	2.59948	2.42087	2.04766	7.43158	3.95118	3.24301
422	2.53216	2.24125	2.13688	8.01783	3.95551	3.3731
423	2.7011	2.44672	1.98441	7.3801	3.88702	3.13691
424	2.67908	2.70528	2.03785	7.6602	4.01126	3.01461
425	2.89129	2.45719	2.16198	7.86153	3.89687	2.93545
426	2.77712	2.52543	1.94445	8.02001	4.03414	2.9216
427	2.69464	2.66772	2.34058	8.90094	3.96163	3.22287
428	2.7632	2.4133	2.32936	9.34896	3.98947	2.85703
429	2.73879	2.4762	2.22081	8.88451	3.93991	2.6527
430	2.68907	2.37837	2.21056	8.10948	3.98976	2.72039
431	2.72107	2.66289	2.16294	8.09892	4.05017	2.62145
432	2.54615	2.86163	2.18203	8.26319	4.00652	2.76377
433	2.8435	2.71235	2.12122	8.07472	4.06785	2.81286
434	2.70489	2.66067	1.98822	8.28409	3.99003	3.11663
435	2.77085	2.52975	1.83679	8.2507	3.92176	3.00968
436	2.73339	2.61943	2.09532	8.1665	3.88622	2.93345
437	2.71903	2.53295	2.14996	7.9522	3.94929	3.18624
438	2.76479	2.33185	2.06681	8.35028	4.08518	3.0791
439	2.78438	2.22912	2.2739	8.5857	3.95671	2.97748
440	2.61003	2.436	2.15748	8.12795	4.00623	3.09506
441	2.85751	2.40494	2.08637	7.53097	4.17306	3.02154
442	2.77468	2.55373	2.17759	7.9812	4.10524	3.028
443	2.77553	2.48475	2.12947	8.81295	4.08835	2.85169
444	2.68056	2.42815	2.10171	8.55654	4.0047	3.04036
445	2.73758	2.45991	2.13252	8.56878	4.02803	3.03178
446	2.70174	2.50111	2.04384	9.5367	3.98226	3.19602
447	2.74189	2.68553	2.04307	9.83415	3.99136	3.03721
448	2.74903	2.4678	2.12414	9.69665	3.91535	2.95614
449	2.62002	2.45409	2.1955	9.84522	3.95366	2.86162
450	2.8524	2.57984	2.23822	6.30161	4.0031	2.97729
451	2.76827	2.61169	2.0914	7.0278	3.99779	3.32891
452	2.73732	2.31368	2.12101	7.11296	4.0365	3.06246
453	2.85916	2.64307	2.04115	6.9789	3.98117	3.19355
454	2.77765	2.46024	2.2123	6.5058	4.12611	3.03042
455	2.58246	2.47726	2.12247	6.91877	4.11742	3.02835
456	2.61405	2.50959	2.03616	7.19005	4.00207	2.83547
457	2.66479	2.40089	2.29585	7.13879	3.93583	2.98244
458	2.82431	2.37366	2.46064	7.53176	3.9204	3.13099
459	2.80959	2.42707	2.09948	6.66574	3.94197	3.3667
460	2.66278	2.17379	2.33746	7.15421	4.02782	3.45282
461	2.58993	2.26466	2.59763	7.79894	3.94716	3.21486
462	2.5643	2.56475	2.57692	8.04074	3.94608	3.10785
463	2.73267	2.33276	2.49437	8.25343	4.28051	3.12926
464	2.70428	2.28099	2.36305	7.64976	4.18826	3.13978
465	2.67741	2.35468	2.23069	7.63898	4.07928	3.16002
466	2.78846	2.27319	2.43753	8.20539	4.00516	3.2244
467	2.57892	2.54264	2.2798	7.8054	4.13033	2.93722
468	2.76959	2.40306	2.47173	7.94303	4.05759	3.16168
469	2.69352	2.53072	2.49504	7.19342	3.93676	3.29377
470	2.23572	2.6735	2.53488	7.25474	4.09048	2.90957
471	2.59948	2.42087	2.57525	7.43158	4.07296	2.7722
472	2.53216	2.24125	2.64437	8.01783	3.93376	2.85537
473	2.7011	2.44672	2.60941	7.3801	4.01505	3.02823
474	2.57908	2.70528	2.75282	7.6602	3.92882	3.1663
475	2.69129	2.45719	2.56435	7.86153	4.00034	3.18482
476	2.57712	2.52543	2.60844	8.02001	3.99001	2.86073
477	2.69464	2.66772	2.60994	8.90094	4.16097	2.85076
478	2.6632	2.4133	2.59195	9.34896	3.96049	3.08124
479	2.63879	2.4762	2.44847	8.88451	3.97067	3.12423
480	2.68907	2.37837	2.54251	8.10948	4.00816	3.35989
481	2.72107	2.66289	2.66981	8.09892	4.04598	3.12963
482	2.64615	2.86163	2.44629	8.26319	3.98777	3.21386
483	2.4435	2.71235	2.51882	8.07472	4.05781	3.03943
484	2.40489	2.66067	2.6562	8.28409	4.09072	3.08858
485	2.47085	2.52975	2.79621	8.2507	4.03084	3.16636
486	2.43339	2.61943	2.56448	8.1665	4.01043	3.08844
487	2.41903	2.53295	2.42202	7.9522	4.08858	3.26453
488	2.76479	2.33185	2.47973	8.35028	3.9764	3.11804
489	2.78438	2.22912	2.5113	8.5857	4.01664	3.39147
490	2.61003	2.436	2.73424	8.12795	3.99758	3.21547
491	2.85751	2.40494	2.77088	7.53097	4.03623	3.47584
492	2.67468	2.55373	2.82945	7.9812	4.01859	3.66704
493	2.77553	2.48475	2.65877	8.81295	4.06672	3.70699
494	2.58056	2.42815	2.72251	8.55654	4.0338	3.91745
495	2.73758	2.45991	2.54776	8.56878	4.14202	3.76271
496	2.50174	2.50111	2.50294	9.5367	3.94338	3.98783
497	2.54189	2.68553	2.69634	9.83415	3.96251	4.01286
498	2.54903	2.4678	2.46287	9.69665	3.90435	4.17581
499	2.62002	2.45409	2.57621	9.84522	3.94261	4.32284
Avarage RMSD	2.3474	2.51946	2.12506	6.96358	3.50133	2.41653

## Sheet: Dihydrofolate reductase
	CHEMBL1966988	CHEMBL340488	ZINC000016682862	ZINC000828645375	CHEMBL3901573	DHFR
0	0	5.21048e-07	0	0	4.85069e-07	0
1	1.36689	1.06713	0.852198	1.01752	0.989488	1.20409
2	1.32978	1.20038	1.15349	1.29741	0.950316	1.39169
3	1.41984	1.15458	1.51448	1.36567	0.887174	1.6206
4	1.4276	1.13812	1.52127	1.26338	1.2321	1.67953
5	2.36242	1.65665	2.22864	1.26587	1.07262	2.2923
6	2.47503	1.51062	2.68625	1.42359	1.11954	2.11208
7	2.41318	1.21691	2.82736	1.35507	1.00379	2.4168
8	2.31345	1.75366	3.09988	1.41179	1.35248	2.69598
9	2.35591	2.0616	2.78264	1.62418	1.45763	2.22492
10	2.41738	1.52298	2.15961	1.78435	1.50515	1.86057
11	2.36529	1.48225	2.19569	1.91881	1.63385	2.20825
12	2.48413	1.85863	2.49395	1.66531	1.93304	2.11632
13	2.43945	1.67668	2.55327	2.00419	1.70373	2.29518
14	2.50932	2.36	2.96578	1.91605	1.51669	2.64598
15	2.57555	2.61494	2.95771	2.11462	1.88009	2.39492
16	2.19404	2.99744	3.47117	2.2954	1.80184	2.45234
17	2.01991	3.30806	3.34471	2.44145	1.98829	2.51387
18	2.40321	2.65795	3.40041	2.87187	1.235	2.45933
19	2.30637	3.1805	3.64928	3.26337	1.49027	2.46931
20	2.52191	3.14151	3.82609	3.71545	1.47952	2.037
21	2.34162	3.45189	4.16788	4.1187	1.37935	2.22855
22	2.26439	3.76012	4.49208	3.95553	1.50082	2.43914
23	2.13664	3.59108	3.43489	3.6089	1.3002	2.34602
24	2.21139	3.00424	3.20993	3.90272	1.33714	2.11829
25	2.55526	4.08069	3.03564	3.60199	1.34516	2.34673
26	2.3754	3.82985	3.21736	3.5673	1.4565	2.37519
27	2.79673	3.47133	3.4917	4.17836	1.38696	2.12054
28	2.75704	3.38751	3.47073	3.76423	1.94053	2.34646
29	3.19187	3.12861	3.53567	3.139	1.87075	2.51014
30	3.41243	2.87073	3.45416	3.10575	2.29955	2.43998
31	3.4958	3.11225	3.78173	3.1883	2.16681	2.55261
32	3.89818	2.98965	3.75181	3.43228	2.40654	2.25851
33	3.70766	3.66509	3.41988	3.45469	2.83129	2.38982
34	3.42545	3.82934	3.13562	3.70035	3.45675	2.54105
35	2.93745	4.08679	3.45981	3.71064	3.92891	2.47191
36	2.95606	4.15991	3.30611	3.8407	3.65825	2.54404
37	2.8989	4.34604	3.1263	4.10506	3.64504	2.45737
38	2.78531	4.36641	2.99335	3.92435	3.34805	2.32463
39	3.00483	4.30193	2.7171	3.44002	3.41556	2.56221
40	3.04244	4.45691	2.98566	2.7198	3.21946	2.3509
41	3.49743	3.2236	3.13235	2.84941	3.22976	2.23925
42	3.5091	3.46195	3.51654	2.87581	3.32049	2.01417
43	3.3066	3.79008	3.01081	2.57667	3.41514	2.48344
44	3.14935	3.86239	3.76813	2.29075	3.21845	2.34892
45	3.415	4.18992	4.33233	2.52037	3.40302	2.37701
46	3.54855	4.17613	4.01219	2.34448	3.35941	2.4454
47	3.57672	3.43597	4.0471	2.45671	3.69474	2.52861
48	3.32477	3.46318	4.52432	2.38703	3.48121	2.5033
49	3.62245	3.27123	4.42225	2.74925	3.62822	2.59587
50	3.19777	2.92439	4.21181	2.61608	3.96846	2.45619
51	3.27083	3.45363	4.4236	2.57801	3.71981	2.47234
52	2.93985	3.87735	4.32273	2.32677	3.62146	2.42679
53	2.88252	3.84609	4.06729	2.3961	3.61885	2.20777
54	3.23968	3.29763	4.50818	2.32895	3.7363	2.50751
55	3.14781	3.41055	4.77414	2.45722	3.3494	2.77482
56	3.55482	3.42129	4.80713	2.74771	3.21988	2.89109
57	3.32083	3.39941	4.78397	2.94147	3.16942	2.96777
58	3.11715	3.34871	4.62368	2.86298	3.38208	2.91086
59	2.48642	3.13246	4.61046	2.76158	3.17736	2.97677
60	2.9407	3.23854	3.96537	2.93597	3.28681	2.81496
61	2.84225	2.90203	3.03493	2.72186	3.16128	2.9591
62	2.86556	2.96276	3.24068	2.89693	3.15255	2.93698
63	3.06815	3.23385	3.02523	3.0743	3.27679	3.05848
64	3.04273	3.46075	2.65597	3.3408	3.20149	3.13406
65	3.14997	3.18291	3.18752	3.22634	3.25023	3.2112
66	2.90971	3.76065	3.24932	3.00747	3.56731	3.28425
67	2.52745	4.07801	3.12525	2.65014	3.27857	3.32476
68	2.85374	3.29496	3.3515	2.65188	3.52217	3.31194
69	2.77803	2.89194	3.55989	2.97167	3.51139	3.24645
70	2.59369	2.35658	3.91771	3.26438	3.48025	3.37043
71	2.85874	1.92691	4.39531	2.82898	3.66985	3.05232
72	2.83785	2.12259	4.3068	2.36954	3.64858	3.44882
73	2.96239	2.00179	4.85374	2.60082	3.58522	3.54292
74	2.55217	1.96207	4.23504	2.43692	4.11973	3.41412
75	2.21154	2.25704	4.02264	2.71651	4.17708	3.31003
76	2.4757	2.16531	4.14555	2.66578	4.31472	3.41159
77	2.66994	2.33734	4.30542	2.93679	4.37434	3.12188
78	2.73417	2.1521	4.42008	2.98802	4.37346	3.21758
79	2.79791	2.21449	4.64172	2.77256	4.44999	2.97474
80	2.42183	2.71441	3.98782	2.47611	4.0186	3.29285
81	2.57064	2.71017	3.25698	2.64956	4.249	3.39533
82	2.30344	2.85368	3.13203	2.3541	3.86247	3.27785
83	2.78415	2.57111	3.36056	2.47057	3.8986	3.05897
84	2.67465	2.31227	3.61886	2.93407	3.95868	3.00371
85	3.01797	2.25017	3.49726	2.75354	4.02512	3.19217
86	2.86394	1.93678	3.30978	2.72536	3.97291	3.34898
87	3.2311	1.80295	2.85815	2.55522	3.77452	3.44713
88	2.66616	2.1677	3.30813	2.65958	3.93011	3.56967
89	2.67196	2.34231	3.59929	2.58344	3.77412	3.41487
90	2.44316	2.47023	3.00237	2.72099	3.68502	3.10663
91	2.80952	2.11802	2.64972	2.67422	3.70023	3.1899
92	3.18577	2.25187	2.80379	2.66175	3.92495	3.34561
93	2.66806	2.12717	3.24386	3.00007	3.90254	3.0195
94	3.12731	2.2131	2.58547	2.8854	3.79132	3.231
95	3.02391	2.09351	3.24466	2.73286	3.69993	3.28269
96	2.71712	2.02464	3.27745	2.66187	3.92716	3.15471
97	2.43895	2.74708	2.61009	2.34899	3.93643	3.11286
98	2.79322	2.50199	2.83552	2.68056	4.04139	3.34684
99	2.85762	2.03917	2.86118	2.62535	4.15603	3.64671
100	2.89872	2.42295	3.23111	2.25327	4.18083	3.54015
101	2.57927	2.74102	3.76037	2.41034	4.14866	3.46956
102	2.36591	2.29938	3.11459	2.80149	4.16272	3.52238
103	2.68547	2.45244	3.8638	2.96513	4.00943	3.36526
104	2.79266	2.39853	3.53169	2.62933	3.82267	3.68616
105	3.17437	2.38798	2.98723	2.51816	3.48584	3.66808
106	3.02053	2.82686	3.08043	2.5288	3.8192	3.51295
107	2.78869	2.49579	3.2322	2.49901	3.79979	3.4661
108	2.5754	2.22891	3.21935	2.85848	3.77289	3.12017
109	2.55186	2.28942	3.25105	2.79426	3.39107	3.29087
110	2.36524	2.56677	3.29674	2.98095	3.45915	3.33307
111	2.93167	3.22387	3.63039	2.99338	3.45324	3.16536
112	2.95997	2.74934	3.37646	2.91385	3.86898	3.35654
113	2.85627	2.66786	3.46966	2.8681	3.76966	3.45891
114	3.11448	2.81632	3.40746	2.58316	3.88152	3.34174
115	3.21698	2.86927	3.94964	2.62017	3.65613	3.29573
116	3.08267	2.83368	3.84631	2.85039	3.6167	3.48971
117	3.10412	3.09971	3.63845	2.97665	3.52754	3.42968
118	3.09202	2.95215	3.49922	3.18654	3.74363	3.39344
119	3.2905	2.88681	3.83093	3.12365	4.33415	3.33139
120	3.13626	2.72852	3.99104	3.22581	3.99956	3.04495
121	3.38747	2.88788	3.85035	3.40294	3.46799	3.54753
122	3.1926	3.27258	3.42631	3.21849	3.35699	3.67215
123	2.99943	3.11889	3.34747	3.06303	3.38889	3.4301
124	3.39739	3.25844	4.07341	3.3525	3.47158	3.27593
125	3.23028	3.33094	3.79664	3.46567	3.45327	3.38985
126	3.51054	3.16133	3.74784	2.90812	3.3184	3.42045
127	3.41407	2.95759	4.15544	2.91081	3.41426	3.2862
128	3.26486	2.59515	3.76192	2.87228	3.91702	3.38816
129	3.12274	2.85746	3.75308	3.38662	3.67866	3.33121
130	3.50365	3.12201	4.00341	3.16002	3.68984	3.07607
131	3.47326	2.96838	3.94514	3.56288	3.64586	3.25956
132	3.36558	2.98597	3.94576	3.00265	3.45254	3.36314
133	3.39858	3.05335	3.99288	3.79647	3.33913	3.33323
134	3.46025	3.18902	4.993	3.48137	3.46484	3.56332
135	3.11978	3.15295	4.21571	3.27573	3.33669	3.38999
136	3.18363	3.29329	3.99724	3.09128	3.32477	3.4863
137	3.31736	3.23028	3.92849	3.58601	3.33014	3.0199
138	2.96594	3.41103	3.95046	3.83418	3.53142	3.2636
139	3.17128	3.4393	4.04102	3.97967	3.58458	3.33615
140	3.16775	3.30787	3.3046	3.76821	3.60566	3.29021
141	3.73708	2.87595	3.37326	3.56839	3.91335	3.24989
142	3.70788	3.03224	3.70423	3.96119	4.26446	3.36423
143	3.1995	2.87242	4.02161	3.91136	3.86821	3.26357
144	3.11856	2.93696	4.00844	3.61595	3.53361	3.2989
145	3.41915	2.97513	4.1704	4.10128	3.41875	3.31728
146	3.58464	3.31432	4.11576	4.07305	3.53102	3.34503
147	3.62796	3.21889	3.93606	4.00709	3.55092	3.34773
148	3.31289	3.14845	3.79989	4.18998	3.5754	3.42605
149	2.96051	2.98253	3.68507	4.00851	3.73665	3.24147
150	3.12652	3.21743	3.50783	4.31687	3.72678	3.48475
151	2.91939	3.2483	3.01434	4.41797	3.80541	3.35796
152	3.04086	3.30791	3.39831	3.94634	3.94567	3.23499
153	2.90487	3.47287	3.4923	4.18618	3.75186	3.67839
154	2.9977	3.15139	3.24006	2.98428	3.97691	3.37068
155	3.1565	2.93471	4.06627	3.54595	3.99475	3.10639
156	3.05861	2.90555	3.82662	3.08631	3.92003	3.6444
157	2.91641	3.20597	3.79643	3.48929	3.78292	3.47562
158	3.14582	3.19009	3.55872	3.0708	3.2174	3.48721
159	3.05941	2.80607	3.17492	2.93244	2.39252	3.21153
160	3.11396	2.94437	2.9552	2.74735	2.32073	3.48589
161	3.21462	2.63266	2.89409	2.35679	2.87079	3.23218
162	3.19988	2.80939	3.08346	2.43757	2.99505	3.53241
163	3.39374	2.66674	2.45221	2.47037	3.1263	3.47408
164	3.57154	2.56697	2.47043	2.51581	3.22544	3.30035
165	3.4657	2.91597	2.54308	2.27381	3.09071	3.29319
166	3.31346	3.08276	2.7101	2.3393	3.0615	3.21491
167	3.27987	2.58015	2.7497	2.37346	2.83217	3.16451
168	3.48551	2.76361	2.81705	2.38883	2.66077	3.02041
169	3.13833	2.79946	2.69551	2.24198	2.60372	3.12066
170	3.17257	2.87174	3.27131	2.27437	3.19931	3.2447
171	3.07366	2.48068	3.03252	2.33562	3.09205	3.19452
172	3.04524	2.72124	2.77012	2.29559	3.05187	3.50479
173	2.95962	2.67937	3.01026	2.57686	2.98852	3.4875
174	3.44233	2.78865	2.67852	2.1625	3.53313	3.73398
175	3.09045	2.80671	2.93886	2.43256	3.18943	3.58657
176	3.39217	2.74849	3.00823	2.4803	3.45742	3.40164
177	3.55439	2.68724	3.35131	2.62327	3.43813	3.58291
178	3.22996	2.32781	3.28275	2.66553	3.98132	3.66087
179	2.99806	2.37956	2.17806	2.52752	3.43134	3.5478
180	2.96631	2.41786	2.51396	2.72498	3.94533	3.48667
181	3.11664	2.53831	2.42263	2.57179	3.97338	3.37793
182	3.28869	2.57931	3.03185	2.64321	3.69948	3.24005
183	3.52701	3.03641	3.3304	2.5088	3.31812	3.57047
184	3.48078	3.22565	2.93859	2.38012	3.61802	3.47841
185	3.43413	2.83668	3.01466	2.5261	3.64385	3.41049
186	3.40034	2.39228	3.33632	2.47087	4.06524	3.57242
187	3.31645	2.59978	3.46109	2.47646	3.6802	3.59937
188	3.45667	2.52917	3.94635	2.45575	3.72099	3.5035
189	3.43214	2.51978	3.94183	2.36572	3.57746	3.46689
190	3.13472	2.56489	3.61119	2.51331	3.95391	3.4219
191	3.16821	2.43592	3.71044	2.61036	4.0083	3.51565
192	2.90747	2.68631	3.38458	2.38686	4.08092	3.63092
193	3.38688	3.33233	3.03338	2.43613	4.06378	3.69827
194	3.45124	2.96386	3.55623	2.83292	4.37885	3.68699
195	3.44172	2.61362	3.09155	2.56497	4.81	3.57512
196	3.46201	2.81453	3.34907	2.72799	4.65588	3.55201
197	3.54753	2.75785	3.54383	2.70999	4.45588	3.48149
198	3.08513	2.76087	3.03768	2.5521	4.57438	3.7632
199	3.23489	2.81749	3.17851	2.64468	4.64436	3.79787
200	3.40173	2.64861	2.90577	3.0691	5.33962	3.64215
201	2.94354	2.5575	2.98276	2.66278	5.02945	3.75751
202	3.06001	2.70238	3.41294	2.72546	4.58252	3.69516
203	3.63167	2.97822	3.2898	2.37146	4.44258	3.59411
204	3.5562	2.99464	3.12094	2.83604	4.61872	3.83322
205	3.68173	3.06484	3.20451	2.52314	4.90606	3.90874
206	3.38982	3.02568	3.48263	2.3901	4.29138	3.98103
207	3.83999	3.24823	3.35843	2.85583	4.59486	3.79309
208	3.45361	3.22256	3.27858	2.97585	4.31952	3.70673
209	3.45356	3.1587	2.77719	2.82093	4.33584	3.9392
210	3.40674	3.15837	2.97712	2.95351	3.74736	3.78048
211	3.39019	3.06458	3.30443	2.92001	3.68935	3.65262
212	3.55073	3.03079	3.48411	2.97632	3.71662	3.50911
213	3.21848	3.12891	3.67483	2.62243	3.63314	3.549
214	3.44907	3.06512	3.24285	2.65124	3.82017	3.66167
215	3.34487	3.08552	3.24553	2.56727	3.94568	3.57798
216	3.50582	3.11516	3.22853	2.80768	3.71631	3.42828
217	3.42532	3.08504	2.7038	2.69895	3.84854	3.51934
218	3.17176	3.15143	2.9853	2.62637	3.53229	3.43815
219	3.2115	3.20968	2.78858	2.77136	3.89033	3.65474
220	3.3315	3.06967	2.88357	2.97025	4.09346	3.52891
221	2.99252	3.03874	3.0924	2.72396	4.68669	3.31901
222	3.29625	3.07678	3.05535	2.66164	4.30285	3.31294
223	3.12213	3.00146	2.9678	2.32247	4.21781	3.45381
224	3.49582	3.08551	2.99795	2.28425	4.47809	3.51337
225	3.18262	2.99357	3.27559	2.74148	4.19581	3.56275
226	3.59104	3.05011	3.26829	3.29974	4.15155	3.41343
227	3.32996	3.25674	3.65762	3.12852	4.17042	3.52823
228	3.20231	3.10052	3.30326	3.53491	4.53328	3.50844
229	3.32123	3.18144	3.51272	3.22485	4.61528	3.36322
230	3.41409	3.22723	3.57327	2.04812	4.67759	3.44605
231	3.28322	3.22586	3.28764	2.23357	4.66759	3.47
232	3.14889	3.22357	3.20752	2.94783	4.58881	3.54445
233	3.27207	3.1331	4.05563	3.00701	4.57537	3.46409
234	3.33117	3.17803	3.643	3.41972	4.40095	3.63514
235	3.27192	2.99687	3.49717	2.31547	4.3757	3.51739
236	3.12522	3.16248	4.19917	2.38247	4.24964	3.52952
237	3.56145	3.0205	3.78719	2.16223	4.38244	3.61617
238	3.32859	3.05927	4.14116	2.53535	4.26047	3.48856
239	3.1631	3.09339	3.62157	2.20848	3.65062	3.46245
240	3.10758	3.05774	3.73903	2.99943	3.53844	3.57162
241	3.58797	3.11846	3.30086	2.56044	3.14876	3.69388
242	3.37436	3.12019	3.57835	2.74333	3.52451	3.40264
243	3.41281	3.08014	3.77954	2.77643	3.75925	3.66938
244	3.08338	3.13121	3.49389	2.5712	3.72568	3.69373
245	3.15747	3.11397	3.58924	2.40463	3.12516	3.49876
246	3.40269	2.90179	2.98004	2.50105	3.19461	3.35722
247	3.55132	2.95087	3.04477	2.37694	3.78039	3.68773
248	3.32884	2.94008	2.97597	2.50569	3.9322	3.39962
249	3.40226	2.90474	3.06136	2.30931	4.27741	3.4824
250	3.39716	3.08163	3.11541	2.93824	4.04183	3.45442
251	3.40183	2.95766	3.67284	3.24629	3.94816	3.58127
252	3.5717	2.96924	3.60892	2.8284	3.94071	3.59424
253	3.34495	3.1385	3.7641	3.39545	4.39044	3.58709
254	3.24508	3.06888	3.46083	3.44506	3.93086	3.28756
255	3.34078	2.99176	3.97812	3.61927	4.10691	3.39065
256	3.2142	3.02538	3.29361	3.32685	3.87847	3.14267
257	3.20074	3.10206	2.98752	3.17794	3.82966	3.04422
258	3.32593	3.00049	3.2528	3.04264	4.17115	3.26326
259	3.18156	3.04996	3.17086	2.76494	4.0892	3.12111
260	3.2834	3.05334	2.94709	2.80675	4.33507	3.39825
261	3.20784	2.98104	2.6907	2.57253	4.27752	3.24928
262	3.48877	3.17768	2.90677	2.62219	4.25145	3.37096
263	3.19469	3.10086	2.77628	2.64068	4.05532	3.1734
264	3.49593	3.0712	2.75456	2.816	4.25949	3.13505
265	3.25661	3.10413	3.61334	2.99843	4.27717	3.30412
266	3.57272	3.02695	3.77394	2.88043	4.73479	3.1721
267	3.58769	2.97851	3.26164	2.71389	4.10955	3.18897
268	3.27346	3.01419	3.42291	2.83105	4.69259	3.40221
269	3.34974	3.12533	3.24696	3.16137	4.79656	3.45816
270	3.5502	3.06437	3.27253	2.61525	4.57212	3.32689
271	3.11629	3.00742	3.57984	2.66638	4.3796	3.04312
272	2.99186	2.88936	3.86978	2.34187	4.59788	3.27415
273	2.99874	2.8008	3.57788	2.36393	4.56321	3.52925
274	3.21712	2.89555	3.83041	2.71483	4.70849	3.47645
275	3.32256	2.91056	3.65229	2.59342	4.55446	3.20839
276	3.41032	2.99638	3.17724	2.87304	4.42231	3.25774
277	3.23683	3.00531	3.37168	3.0322	4.46579	3.22001
278	3.17803	3.12667	3.59275	3.27275	4.65708	3.16906
279	3.57712	3.12358	3.38923	3.01057	4.66325	3.24221
280	3.72745	3.20307	3.08468	3.16696	4.71326	3.30231
281	3.63986	3.14777	3.18617	3.22063	4.42859	3.28664
282	3.72162	3.22891	3.1988	3.30688	4.57035	3.35928
283	3.12378	3.11687	3.48179	3.09842	4.57383	3.28331
284	3.25075	3.05254	3.48893	3.39921	4.93363	3.22449
285	2.98631	3.19955	3.86507	3.27437	5.05193	3.38635
286	3.08255	3.17668	3.89642	3.07187	4.84576	3.33511
287	3.55909	3.29364	3.93373	3.39713	4.93512	3.52426
288	3.45187	3.13672	3.99898	3.17854	4.88611	3.56662
289	2.96967	3.22704	3.822	2.97172	4.94319	3.44269
290	3.06028	3.1605	3.65477	2.84169	4.64135	3.37674
291	3.54665	3.22171	3.4445	3.02891	4.53318	3.46619
292	3.23614	3.23045	3.70197	2.74033	4.70097	3.45524
293	3.40099	3.08912	4.0198	2.64292	4.64304	3.12247
294	3.36883	3.23362	3.87614	2.92552	4.74916	3.01126
295	3.20957	3.18325	3.03453	2.21643	4.6471	3.37584
296	3.49988	3.10505	3.16767	2.72681	4.50647	3.27854
297	3.72986	3.15658	3.42731	2.31976	4.7821	3.27176
298	3.6853	3.22329	3.07961	2.39819	4.74636	3.22424
299	3.73459	3.01865	3.31959	2.49027	4.60955	3.22874
300	3.5243	3.08505	2.88314	2.25697	4.74603	3.24651
301	3.04446	3.07911	2.93305	3.05431	4.64081	3.34316
302	3.12234	3.09313	3.04784	3.24584	4.75387	3.01187
303	3.03324	3.20333	3.18617	2.81535	4.73429	3.05637
304	3.13041	3.14531	3.13341	2.75675	4.69714	3.02581
305	3.34027	3.20394	3.25935	3.19795	4.53865	3.10785
306	3.05761	3.17106	3.23379	2.6397	4.85254	3.02021
307	3.14286	3.14925	3.54564	2.42964	4.69417	3.10403
308	3.06086	3.1424	3.25244	2.62097	4.7265	3.19346
309	3.30165	3.19799	3.58991	2.37547	5.011	3.01688
310	2.90172	3.08185	3.45554	2.50443	4.94116	3.16318
311	3.41282	3.10825	3.6474	2.66847	4.83082	3.10961
312	2.93006	3.19638	3.50242	2.76183	4.99975	2.71883
313	3.51499	3.06642	3.53626	2.98395	4.63541	2.99289
314	3.06449	3.00839	3.29859	2.80953	4.57463	2.81108
315	3.23267	3.05134	3.54659	2.82796	4.55306	2.83785
316	3.11532	3.01981	3.10377	2.6636	4.99693	2.82338
317	3.58627	3.09078	2.93503	3.10954	4.71735	2.95985
318	3.62742	3.23621	2.87516	3.10211	5.05669	3.05642
319	3.28201	3.24916	2.58919	3.06004	5.16367	3.25655
320	3.12836	3.25521	2.84608	2.97979	5.09567	3.15279
321	3.82289	3.11908	2.94378	3.13528	5.046	3.29616
322	3.48296	3.13685	2.92427	3.0071	5.15694	3.41955
323	3.38583	3.08152	2.68296	2.94925	5.13866	3.48021
324	3.35695	3.09931	2.91773	3.38648	5.15241	3.27683
325	3.80141	3.0993	2.67654	3.20697	4.98255	3.39176
326	3.58868	3.04037	2.91727	2.95774	4.98304	3.27866
327	3.75392	3.04579	3.01502	3.47733	5.10741	3.26469
328	3.79923	3.07428	2.90555	3.1107	5.04282	3.30461
329	3.59586	3.20987	3.00653	3.26421	5.14812	3.28742
330	3.22757	3.20965	2.41774	3.16289	5.08843	3.06443
331	3.15064	3.02228	2.55628	3.0132	5.03717	3.02468
332	3.49301	3.08246	2.86741	3.26508	5.15074	3.00523
333	3.50449	3.1053	2.59299	3.11388	5.03272	3.18689
334	3.21347	3.20071	2.60226	3.53533	4.89594	3.13403
335	3.08782	3.1695	2.7038	2.80945	5.08688	3.10266
336	3.1356	3.03066	2.73236	3.03931	5.16815	3.29409
337	3.35573	3.13948	2.91123	3.61992	5.02532	3.27348
338	3.04114	3.03674	2.89246	3.56532	5.13744	3.39772
339	3.32386	3.16272	2.64978	3.19853	5.2033	3.21809
340	3.6038	3.17715	2.57849	3.75946	5.0843	3.29252
341	3.00453	3.05185	2.66592	2.75946	4.9202	3.31847
342	3.35392	3.16536	2.67737	2.73758	5.16319	3.28859
343	3.32222	2.97809	2.66913	2.96393	5.11191	3.28998
344	3.45018	2.83022	2.97814	2.77787	5.10028	3.30172
345	3.16103	2.9823	3.00081	2.91484	5.06983	3.27169
346	3.34543	2.9253	3.10986	3.0007	5.14731	3.27739
347	3.7119	3.06479	3.05263	3.46908	5.11934	3.3657
348	3.78076	2.94719	2.85403	3.15422	5.03522	3.43029
349	3.64074	3.17843	2.97986	2.79722	4.93537	3.37931
350	3.00775	2.98748	2.88179	2.90574	5.18418	3.57949
351	3.46891	3.09885	2.73347	2.99755	5.07666	3.43328
352	3.27704	3.08532	3.10828	2.88294	5.13641	3.43166
353	3.51695	2.99401	3.28995	3.45974	4.99615	3.21108
354	3.18136	3.02328	3.1623	3.65718	5.14744	3.29842
355	3.05148	3.10428	3.09759	3.26912	5.19073	3.34888
356	3.24708	3.0819	3.10479	3.80658	5.16435	3.27947
357	3.0661	3.03722	2.98141	3.54252	5.20913	3.2884
358	3.85349	3.14569	3.41217	3.63644	5.05607	3.22817
359	3.40775	3.09382	3.15593	3.33321	5.15386	3.17113
360	3.19199	3.1778	2.82104	3.00052	5.11667	3.17987
361	3.59889	3.10291	2.9293	3.23715	5.11557	3.05161
362	3.4618	3.09528	2.9461	3.34452	5.21836	2.96628
363	3.22781	3.14292	3.28432	3.56815	5.17915	2.90664
364	3.21909	3.1509	2.81018	3.25431	5.23359	2.84435
365	3.30606	3.10777	3.06807	3.6339	5.30962	2.94093
366	3.17643	3.20569	2.79042	3.1575	5.42402	2.9001
367	3.70825	3.19934	2.87576	3.06199	5.31121	2.83286
368	3.50988	3.21891	3.20384	2.77172	5.11432	2.91343
369	3.35495	3.08427	3.10661	3.52225	5.24685	2.94371
370	3.11031	3.15109	2.93173	3.37304	5.27233	2.915
371	3.04228	3.20137	2.92235	3.64705	5.42899	3.0763
372	3.21035	3.15717	3.03096	2.8243	5.32044	3.2282
373	3.44484	3.22385	3.12612	2.80251	5.18895	3.25
374	3.34386	3.24414	3.37335	2.94723	5.22387	3.11856
375	3.59257	3.13685	3.36335	2.99875	5.26648	3.20122
376	3.53903	3.15392	3.5801	3.6573	5.1328	3.33795
377	3.29707	3.1812	3.11626	3.34145	5.20208	3.13267
378	3.4482	3.23364	2.6825	2.99383	5.28781	3.29549
379	3.35433	3.36516	3.07676	3.49442	5.32259	3.10606
380	3.25642	3.08456	2.95917	3.9378	5.28618	3.19891
381	3.36511	3.079	2.94517	3.76487	5.1407	3.19345
382	3.46032	3.15393	2.90634	3.45988	5.0958	3.21536
383	3.24957	3.25844	2.8978	3.47321	5.23832	2.90578
384	3.3109	3.17933	3.07992	3.2334	5.29701	2.73855
385	3.37287	3.12567	2.94097	3.56034	5.31069	2.94503
386	3.43234	3.0281	3.24286	3.31396	5.27091	2.93638
387	3.51929	3.14463	2.75999	3.69182	5.19131	2.99133
388	3.27039	3.16194	3.1084	3.33808	5.22341	3.1127
389	3.19848	3.10778	3.15555	3.18619	5.08669	3.27378
390	3.35916	3.15149	3.29736	2.9725	5.51403	3.12777
391	3.46754	3.03798	3.58366	2.91141	5.42606	3.09988
392	3.37599	3.15542	3.43032	3.13209	5.11254	3.07858
393	3.62511	3.19885	3.2714	3.46003	5.47793	3.09079
394	3.14613	3.10534	3.28759	3.50354	5.35396	3.00623
395	3.78482	3.1717	2.81133	3.27001	5.28062	3.03104
396	3.44348	3.23587	3.23454	3.27834	5.08957	2.93797
397	3.71288	3.24362	2.91301	3.57314	5.24518	2.82699
398	3.39594	3.14536	2.88416	3.05269	5.25546	2.8372
399	3.72138	3.07348	2.95581	3.37986	5.51548	2.9831
400	3.70658	3.00533	2.95934	3.6624	5.41374	2.95201
401	3.76125	3.00796	2.99925	3.93887	5.24653	2.80725
402	3.90992	2.94169	2.88818	3.79811	5.33665	2.82742
403	3.74704	3.07066	2.96307	3.57931	5.0658	3.0772
404	3.73283	3.08969	2.73018	3.32105	5.05501	3.03465
405	3.84054	3.00785	2.95738	3.6356	5.12422	3.17419
406	3.38613	2.96792	2.92023	3.5301	5.23405	3.21432
407	3.52067	3.08535	3.04091	3.23321	5.17687	3.01271
408	3.77116	3.25547	3.21304	3.41878	5.21553	3.11255
409	3.95507	2.98857	3.10632	3.83226	5.18629	3.1392
410	3.96647	2.87081	2.96776	3.58101	5.32407	3.23789
411	3.90818	2.76581	3.18552	3.9629	5.35512	3.2257
412	3.81562	2.80998	3.03933	3.76129	5.30211	3.1769
413	3.3579	2.66185	3.32687	3.86496	5.08311	3.0418
414	3.35067	2.78808	2.66121	3.7081	5.27579	3.08156
415	3.33549	2.8009	2.49695	3.40396	5.34342	3.15912
416	3.85889	2.76134	2.56591	3.31893	5.32845	3.00543
417	3.65879	2.89803	2.71775	3.39835	5.17501	3.10125
418	3.66942	2.86943	2.75188	3.56052	5.29617	3.1671
419	3.32427	2.68234	2.51771	3.53897	5.23545	3.28758
420	3.45082	3.11206	2.59635	3.34296	5.39869	3.3902
421	3.44908	3.06562	2.52145	3.62261	5.18743	3.27915
422	3.65615	2.92595	2.77561	3.61326	5.11946	3.22189
423	3.6502	2.9462	2.51406	3.4956	5.2508	3.2051
424	3.34895	2.95993	2.82674	3.24376	5.29833	3.24403
425	3.57413	2.87643	3.20574	3.04664	5.007	3.07149
426	3.62099	2.89674	2.93751	3.44458	5.23912	3.05157
427	3.34522	2.78172	2.97752	3.60273	5.17589	3.05853
428	3.77319	2.84387	2.98995	3.41787	5.24793	3.13444
429	3.54374	2.85969	2.80503	3.39478	5.36125	3.14502
430	3.57885	2.94171	2.58395	3.08028	5.34073	3.1995
431	3.29266	2.97483	2.35795	3.48962	5.2731	3.00399
432	3.5119	3.12665	1.98834	3.98708	5.28648	3.16539
433	3.44771	3.26623	2.11185	3.70548	5.1026	3.18106
434	3.4551	3.14741	2.13701	3.23635	5.33734	3.20534
435	3.42863	3.01009	2.07455	3.06032	5.34544	3.16354
436	3.57948	3.10553	2.31135	3.37546	5.21477	3.17784
437	3.45106	2.98007	2.27245	2.96316	5.04963	3.19033
438	3.45882	3.04495	2.32593	3.04771	5.1634	3.29566
439	3.43664	3.20465	2.49093	3.0507	5.00894	3.17492
440	3.34954	3.08641	2.52527	3.20028	5.20701	3.2673
441	3.22696	3.17853	2.58277	3.04879	5.10306	3.25405
442	3.63829	3.24001	2.59604	3.56358	5.14256	3.28797
443	3.57169	3.18661	2.43154	3.93293	5.18773	3.11977
444	3.60984	3.06708	2.42468	3.88199	5.39713	3.12791
445	3.45643	3.07243	2.44556	3.67119	5.36574	3.28977
446	3.47145	2.90002	2.5328	3.7992	5.15928	3.2543
447	3.76916	3.15201	2.41961	3.42067	5.32227	3.18002
448	3.69479	3.08413	2.47417	3.16212	5.26089	3.23769
449	3.37597	3.17274	2.54631	3.43374	5.17696	3.2592
450	3.29639	3.00533	2.95934	3.70958	5.17911	3.25201
451	3.6727	3.00796	2.99925	3.32016	5.22888	3.10725
452	3.51462	2.94169	2.88818	3.55134	5.26089	3.12742
453	3.48894	3.07066	2.96307	3.67869	5.24938	3.0772
454	3.34845	3.08969	2.73018	3.12035	5.03026	3.13465
455	3.41638	3.00785	2.95738	3.50927	5.34356	3.17419
456	3.76524	2.96792	2.92023	3.78455	5.32846	3.21432
457	3.78027	3.08535	3.04091	3.97455	5.57606	3.01271
458	3.51299	3.25547	3.21304	3.46013	5.59794	3.21255
459	3.4547	2.98857	3.10632	3.74294	5.58303	3.1392
460	3.27165	2.87081	2.96776	3.74869	5.07584	3.23789
461	3.39008	2.76581	3.18552	3.70027	4.97807	3.2257
462	3.48389	2.80998	3.03933	4.00087	5.06892	3.0769
463	3.40181	2.66185	3.32687	3.77691	5.37181	3.1418
464	3.39837	2.78808	2.66121	3.90917	5.17097	3.08156
465	3.38737	2.8009	2.49695	3.61003	5.24167	3.25912
466	3.44063	2.76134	2.56591	3.77484	4.94578	3.50543
467	3.25574	2.89803	2.71775	3.61009	5.16818	3.30125
468	3.54355	2.86943	2.75188	3.71241	5.4225	3.1671
469	3.24865	2.68234	2.51771	3.66996	5.22188	3.28758
470	3.58921	3.11206	2.59635	3.37438	5.45251	3.3902
471	3.73187	3.06562	2.52145	3.47129	5.22626	3.07915
472	3.36961	2.92595	2.77561	3.96206	5.10654	3.12189
473	3.47069	2.9462	2.51406	3.34391	5.10945	3.2051
474	3.23721	2.95993	2.82674	3.55486	5.07736	3.34403
475	3.19702	2.87643	3.20574	3.57278	5.12482	3.37149
476	3.2318	2.89674	2.93751	3.59454	4.9661	3.05157
477	3.20994	2.78172	2.97752	3.67863	4.97783	3.25853
478	3.13946	2.84387	2.98995	3.2741	4.80111	3.23444
479	3.25313	2.85969	2.80503	3.17335	4.84215	3.14502
480	3.48752	2.94171	2.58395	3.16142	4.96804	3.2995
481	3.26931	2.97483	2.35795	3.62726	4.65828	3.40399
482	3.51673	3.12665	1.98834	3.21413	4.88818	3.36539
483	3.01306	3.26623	2.11185	3.8709	4.87189	3.18106
484	3.24189	3.14741	2.13701	3.64651	4.8308	3.20534
485	3.54665	3.01009	2.07455	3.60013	4.88414	3.36354
486	3.36989	3.10553	2.31135	3.11298	4.98425	3.57784
487	3.60896	2.98007	2.27245	3.08794	4.80817	3.59033
488	3.24746	3.04495	2.32593	3.72848	4.99184	3.49566
489	3.47888	3.20465	2.49093	3.15721	4.90252	3.47492
490	3.38376	3.08641	2.52527	3.70411	4.78098	3.6673
491	3.43532	3.17853	2.58277	3.3047	4.89995	3.55405
492	3.32149	3.24001	2.59604	3.46424	4.86994	3.58797
493	3.27272	3.18661	2.43154	3.51802	4.67473	3.11977
494	3.39251	3.06708	2.42468	3.1595	4.6886	3.52791
495	3.23085	3.07243	2.44556	3.11438	4.8341	3.58977
496	3.40934	2.90002	2.5328	3.3325	4.95414	3.54304
497	3.22224	3.15201	2.41961	3.62526	4.98709	3.80021
498	3.47438	3.08413	2.47417	3.50547	4.81576	3.53769
499	3.26149	3.17274	2.54631	3.56243	4.86056	3.3392
Avarage RMSD	3.22508	2.97187	3.17984	3.02765	4.22351	3.181

## Sheet: Methionine aminopeptidase 2
	CHEMBL3913373	CHEMBL1962731	CHEMBL3142997	ZINC000199197855	ZINC000016682972	MAP2
0	0	0	0	0	0	0
1	0.833812	0.79189	0.697748	0.707162	0.779449	0.759885
2	0.820556	0.733603	0.780914	0.723701	0.986249	1.06266
3	0.8649	0.843444	0.798928	0.718392	0.841546	0.870009
4	0.727817	0.771684	1.06909	0.768989	0.987214	0.863576
5	0.898232	0.785023	0.974433	0.720803	0.971427	0.973121
6	0.820601	0.800366	0.860257	0.697752	0.881186	1.10978
7	0.84738	0.919308	1.01163	0.741861	0.925607	1.04356
8	0.769081	0.885931	1.0682	0.814164	0.864546	1.03779
9	0.786326	0.950605	1.09058	0.869234	0.897135	1.21512
10	0.90072	1.02014	1.0813	0.830097	0.953682	1.14985
11	0.805286	0.943377	0.922425	0.893204	1.0631	1.15098
12	0.915091	0.984971	0.9746	0.820999	1.01288	1.09454
13	0.885727	0.934016	0.905253	0.864018	1.04251	1.0289
14	0.855236	0.920889	0.944601	0.922502	1.0171	1.1128
15	0.886568	1.00062	1.012	0.994685	0.904152	1.07455
16	0.801944	0.985937	0.948083	0.934111	1.01447	1.09714
17	0.869336	0.98245	0.949226	1.01781	1.10526	1.05072
18	0.891205	0.955388	0.852083	1.08972	1.04339	1.03144
19	0.895634	0.944326	0.820975	1.00782	1.09062	1.13048
20	0.954784	0.97053	0.885751	1.02338	1.13654	1.06822
21	0.734428	1.02607	0.911621	0.994319	1.14101	1.13492
22	0.814009	1.06972	0.825549	1.01456	1.1531	1.22291
23	0.807982	0.970766	0.905364	1.05829	1.21027	1.09407
24	0.954031	1.05812	0.910842	1.00008	1.05552	1.11665
25	0.8829	1.04382	0.822756	1.03048	1.16948	1.01721
26	0.906202	1.12943	0.845501	1.0697	1.18466	1.13177
27	0.988424	1.09083	0.815961	1.10409	1.1575	1.04296
28	0.965058	1.02291	0.890879	1.10694	1.09539	0.978164
29	0.984832	1.1693	0.856046	1.09488	1.07388	1.05601
30	0.943468	1.03505	0.953463	1.08839	1.1364	1.08301
31	0.984652	1.02531	0.833385	1.10179	1.05093	1.09772
32	1.15101	1.04959	0.937278	1.09912	1.13851	1.08531
33	1.15329	1.15178	0.808814	1.23022	1.04826	1.12932
34	1.19248	1.12979	0.968126	1.07679	1.16756	1.09686
35	1.18124	1.17584	0.979222	1.04913	1.08219	1.06587
36	1.14298	1.10907	1.04603	0.990819	0.988221	1.06693
37	1.10036	1.13467	0.965409	0.970269	1.11411	1.17424
38	1.20564	1.07483	1.0107	1.00755	1.06667	1.09793
39	1.14435	1.10516	1.04313	0.97887	1.17563	1.16228
40	1.18443	1.07303	0.954109	0.972009	1.17547	1.02212
41	1.19544	1.12718	1.04259	1.0015	1.05956	1.14102
42	1.11025	1.03952	1.03369	0.963445	1.04181	1.09352
43	1.06969	0.990295	1.18862	1.22515	1.10551	1.03515
44	1.12293	0.962559	1.02667	1.13767	1.20785	1.03134
45	1.09804	0.9625	1.03841	1.01695	1.1327	1.09581
46	1.20098	1.15084	1.00876	1.24582	1.17553	1.06764
47	1.11738	1.13595	1.13122	1.16321	1.22899	1.21812
48	1.14601	1.05062	1.09593	1.12465	1.06659	1.23402
49	1.14249	1.00664	1.10248	1.28752	1.16228	1.20843
50	1.23397	0.99966	1.12277	1.18144	1.09137	1.04709
51	1.22958	1.00839	1.1719	1.16007	1.136	1.02057
52	1.21564	0.972544	1.12451	1.2513	1.12596	1.17932
53	1.37343	0.95454	1.3057	1.35937	1.08915	1.09927
54	1.21763	0.964442	1.1836	1.26491	1.14591	1.13818
55	1.12812	1.00785	1.1191	1.26643	1.16647	1.20432
56	1.17253	0.968526	1.13052	1.29472	1.19167	1.08022
57	1.04994	0.968159	1.21084	1.27793	1.08538	1.11971
58	1.26343	0.983823	1.14934	1.23724	1.07443	0.97981
59	1.2563	0.997629	1.01016	1.24072	1.09766	1.08999
60	1.18936	1.03599	1.29165	1.37124	1.03866	1.06311
61	1.13599	1.0276	1.12191	1.40981	1.26036	1.13175
62	1.44539	1.01339	1.14063	1.38637	1.115	1.12644
63	1.20091	0.990522	1.15779	1.22895	1.07894	1.07029
64	1.20783	1.0178	1.28956	1.18152	1.11476	1.11826
65	1.47345	1.01862	1.18802	1.05398	1.1089	1.07582
66	1.22689	1.02728	1.15656	1.22971	1.13203	1.1389
67	1.35199	1.04077	1.1112	1.20302	1.08602	1.11707
68	1.42704	1.13428	1.20439	1.25887	1.0396	1.0454
69	1.31159	1.22682	1.16974	1.34527	1.09376	1.07413
70	1.28921	1.14066	1.16865	1.1102	1.1999	1.12493
71	1.35354	1.13977	1.1781	1.21677	1.10613	1.29602
72	1.34654	0.961003	1.14743	1.09353	1.05876	1.13293
73	1.35883	0.985427	1.23535	1.09143	1.22559	1.23977
74	1.24079	1.0959	1.13573	1.19852	1.18145	1.20664
75	1.36996	1.05878	1.14742	1.11507	1.09382	1.24075
76	1.2218	1.00943	1.16982	1.17667	1.16888	1.09868
77	1.38207	1.08547	1.14095	1.22156	1.095	1.12766
78	1.33451	1.05895	1.26986	1.15658	1.17551	1.2629
79	1.3666	1.02047	1.25093	1.12024	1.11433	1.29802
80	1.26169	1.149	1.28332	1.11479	1.16041	1.33221
81	1.46068	1.14492	1.27655	1.06363	1.27611	1.25726
82	1.36982	1.12854	1.36852	1.15326	1.26836	1.22893
83	1.40307	1.04677	1.25546	1.03102	1.16351	1.18229
84	1.28457	1.05142	1.55432	1.07461	1.14364	1.06224
85	1.36144	1.05327	1.4531	1.08241	1.14495	1.12438
86	1.39473	1.15604	1.30583	1.13424	1.12353	1.25286
87	1.38773	1.139	1.24883	1.23229	1.2005	1.17192
88	1.40298	1.08378	1.3594	1.10863	1.29098	1.16347
89	1.35195	1.08059	1.14924	1.12149	1.21312	1.16891
90	1.34446	1.03664	1.18114	1.11453	1.16354	1.18431
91	1.34673	1.00782	1.23028	1.05866	1.29872	1.14322
92	1.40101	1.02358	1.12526	1.09707	1.19918	1.18507
93	1.3422	1.00563	1.26406	0.977129	1.17575	1.17613
94	1.28808	1.04981	1.34779	1.07636	1.15198	1.16228
95	1.42376	1.02155	1.25992	1.13048	1.15691	1.1191
96	1.31207	1.05073	1.28456	1.14533	1.21257	1.12646
97	1.34001	1.0505	1.36682	1.13278	1.14038	1.15426
98	1.33134	1.08364	1.32765	1.10051	1.21473	1.18227
99	1.41786	1.06025	1.26014	1.31836	1.22762	1.21184
100	1.37958	1.09866	1.32183	1.19376	1.22551	1.21932
101	1.54075	1.06713	1.30096	1.16569	1.15936	1.08171
102	1.32924	1.13911	1.19973	1.28656	1.19998	1.08275
103	1.29961	1.1207	1.30003	1.1692	1.2226	1.27998
104	1.32367	1.19232	1.28513	1.1731	1.16902	1.21975
105	1.38585	1.13099	1.22331	1.27718	1.11384	1.26952
106	1.38417	1.12608	1.26338	1.48889	1.23008	1.25744
107	1.37158	0.994349	1.29401	1.21701	1.19026	1.3875
108	1.3512	1.16448	1.21031	1.29457	1.16474	1.26693
109	1.27125	1.1292	1.2004	1.36078	1.16252	1.24383
110	1.34801	1.11035	1.21256	1.3066	1.1812	1.1515
111	1.3513	1.07206	1.16885	1.19866	1.39413	1.11005
112	1.39121	1.06705	1.16257	1.33752	1.38704	1.16337
113	1.3819	1.10414	1.14639	1.27712	1.39826	1.10555
114	1.43421	1.06453	1.09212	1.23064	1.36252	1.10265
115	1.46468	1.1779	1.26665	1.26207	1.29653	1.1439
116	1.36667	1.04574	1.24999	1.17805	1.30275	1.26361
117	1.50569	1.03219	1.2642	1.27777	1.31497	1.27929
118	1.46489	1.13534	1.23763	1.13329	1.40357	1.09942
119	1.50063	1.14423	1.17958	1.30409	1.26561	1.21209
120	1.41607	1.08753	1.23401	1.24775	1.26001	0.98733
121	1.44081	1.07556	1.16401	1.23937	1.27112	1.1267
122	1.60236	1.08325	1.12846	1.16702	1.31527	1.1056
123	1.46175	1.09995	1.28627	1.09879	1.40282	1.08118
124	1.44873	1.1274	1.19976	1.36135	1.24052	1.21162
125	1.72415	1.16043	1.23315	1.16556	1.2739	1.22701
126	1.50073	1.06679	1.25768	1.17648	1.08694	1.07789
127	1.55639	1.19106	1.12901	1.1278	1.22206	1.0912
128	1.51347	1.12106	1.25883	1.27125	1.18946	1.07285
129	1.4895	1.10794	1.27424	1.2227	1.12323	1.13658
130	1.53816	1.07566	1.26672	1.17508	1.13703	1.21866
131	1.52903	1.14952	1.20816	1.13804	1.31822	1.23612
132	1.605	1.15847	1.2014	1.24146	1.10489	1.13421
133	1.53899	1.21502	1.15064	1.23657	1.10819	1.22819
134	1.38937	1.16563	1.14796	1.22636	1.20225	1.32541
135	1.53724	1.15499	1.25076	1.2676	1.19469	1.18516
136	1.53459	1.19137	1.23261	1.15002	1.30945	1.29106
137	1.43116	1.2138	1.25486	1.04196	1.24686	1.21918
138	1.48345	1.28753	1.21319	1.04693	1.22115	1.12178
139	1.36627	1.25317	1.37016	1.19413	1.10397	0.995294
140	1.43934	1.28832	1.33302	1.17627	1.11776	1.12914
141	1.4964	1.28098	1.28771	1.21309	1.09369	1.13677
142	1.49795	1.23858	1.31568	1.16271	1.28176	1.11379
143	1.45492	1.34528	1.33315	1.27349	1.18539	1.1078
144	1.41162	1.25628	1.41187	1.18698	1.25828	1.17235
145	1.49227	1.16367	1.23497	1.1923	1.25729	1.17668
146	1.52007	1.19397	1.31359	1.24646	1.29245	1.20676
147	1.6212	1.18047	1.33736	1.14184	1.15301	1.21975
148	1.48807	1.3138	1.23767	1.11263	1.07449	1.23915
149	1.53995	1.13953	1.26516	1.09019	1.11096	1.22294
150	1.38351	1.12823	1.36495	1.34691	1.28193	1.30138
151	1.52866	1.13394	1.29278	1.16944	1.32671	1.31228
152	1.43624	1.13593	1.22519	1.19587	1.05407	1.15848
153	1.35177	1.13345	1.1963	1.27651	1.13029	1.2041
154	1.3221	1.10026	1.26703	1.17743	1.20686	1.27972
155	1.32993	1.10966	1.15329	1.09035	1.34054	1.15831
156	1.46477	1.14403	1.30662	1.19688	1.22815	1.24873
157	1.36485	1.29331	1.38187	1.1103	1.33411	1.23079
158	1.36267	1.1172	1.32194	1.20624	1.20383	1.24948
159	1.44555	1.14748	1.39848	1.15158	1.2921	1.34648
160	1.47022	1.16885	1.44456	1.21657	1.2109	1.22337
161	1.43705	1.30428	1.43547	1.28503	1.36118	1.29471
162	1.51478	1.28122	1.34759	1.27845	1.34734	1.2058
163	1.34347	1.24524	1.31532	1.32863	1.29651	1.20522
164	1.34783	1.28838	1.38549	1.2788	1.36373	1.15912
165	1.45416	1.27091	1.31597	1.05276	1.30209	1.36172
166	1.42299	1.15946	1.44313	1.09471	1.29156	1.20108
167	1.38269	1.30197	1.56064	1.15882	1.27439	1.34718
168	1.35883	1.17194	1.65201	1.31322	1.51837	1.33905
169	1.42189	1.0854	1.51316	1.20668	1.44714	1.24134
170	1.44443	1.24579	1.58356	1.13315	1.25668	1.24809
171	1.39325	1.35296	1.54412	1.30234	1.46111	1.19247
172	1.26097	1.40027	1.69555	1.18309	1.4437	1.31914
173	1.38518	1.40329	1.43755	1.12324	1.62137	1.24878
174	1.51404	1.42686	1.54294	1.32385	1.64163	1.28521
175	1.42198	1.38987	1.48517	1.24833	1.56221	1.36105
176	1.41396	1.50789	1.39831	1.21998	1.57067	1.39067
177	1.25635	1.55068	1.6417	1.22409	1.60555	1.29178
178	1.34408	1.63594	1.46035	1.26457	1.66004	1.17585
179	1.19659	1.58047	1.36033	1.05272	1.58054	1.14435
180	1.36048	1.56852	1.46164	1.06196	1.54581	1.38072
181	1.23311	1.36257	1.59612	1.22162	1.696	1.14297
182	1.35636	1.49355	1.64941	1.26647	1.6571	1.27393
183	1.17677	1.50168	1.58384	1.16378	1.57774	1.32188
184	1.23859	1.42005	1.5682	1.35433	1.62832	1.19689
185	1.21161	1.4092	1.34577	1.25219	1.55664	1.22605
186	1.31789	1.3028	1.38705	1.18835	1.54486	1.35042
187	1.41851	1.30579	1.4708	1.11305	1.65753	1.44416
188	1.41496	1.50708	1.56179	1.12671	1.58045	1.41773
189	1.35286	1.33366	1.51505	1.15388	1.57159	1.37753
190	1.27962	1.36791	1.68201	1.19199	1.45609	1.38245
191	1.27376	1.23702	1.331	1.21954	1.4197	1.36002
192	1.36202	1.32458	1.49476	1.12796	1.40309	1.33069
193	1.31285	1.42739	1.39748	1.16954	1.23138	1.27816
194	1.24682	1.3716	1.60919	1.21784	1.34236	1.27998
195	1.27815	1.44792	1.53396	1.21946	1.34439	1.29953
196	1.24616	1.37449	1.47644	1.20542	1.34929	1.16639
197	1.36142	1.29647	1.40437	1.17422	1.35171	1.31922
198	1.19884	1.49202	1.51035	1.27121	1.41455	1.31633
199	1.15969	1.29745	1.33853	1.32414	1.25694	1.26903
200	1.33564	1.28187	1.51185	1.2789	1.17568	1.39177
201	1.30018	1.248	1.64761	1.30379	1.31946	1.29143
202	1.29335	1.23508	1.49014	1.24055	1.31559	1.31116
203	1.27269	1.16425	1.43155	1.36531	1.39409	1.21498
204	1.19428	1.36444	1.52573	1.29492	1.38241	1.28409
205	1.27498	1.21233	1.44521	1.35863	1.45186	1.16413
206	1.20838	1.30607	1.47244	1.23069	1.39132	1.33146
207	1.25576	1.29353	1.47431	1.29438	1.35808	1.42626
208	1.4088	1.27586	1.49636	1.17275	1.50296	1.47806
209	1.33311	1.29066	1.48027	1.38159	1.56126	1.34626
210	1.44488	1.27046	1.59813	1.45144	1.41809	1.5041
211	1.50074	1.25683	1.37337	1.30862	1.4012	1.55286
212	1.3927	1.39843	1.35703	1.30663	1.54094	1.39771
213	1.36397	1.28002	1.44138	1.49303	1.39135	1.47634
214	1.32914	1.28446	1.36966	1.35356	1.37659	1.50911
215	1.46419	1.21629	1.42722	1.46741	1.40647	1.64474
216	1.42315	1.29868	1.48363	1.49238	1.35829	1.67644
217	1.46017	1.28848	1.36857	1.37975	1.48112	1.58531
218	1.54319	1.33737	1.41481	1.409	1.52017	1.74515
219	1.44085	1.27895	1.49354	1.32552	1.40176	1.82873
220	1.41602	1.25329	1.37535	1.16039	1.51227	1.79576
221	1.34399	1.36069	1.49314	1.40592	1.37826	1.88909
222	1.37494	1.26679	1.5017	1.27384	1.46077	1.84956
223	1.43696	1.3633	1.50036	1.38927	1.25025	1.67494
224	1.48391	1.31184	1.53112	1.28962	1.4717	1.65643
225	1.48436	1.32229	1.5939	1.23394	1.49966	1.47586
226	1.47372	1.38513	1.4303	1.3143	1.51527	1.73698
227	1.4494	1.29485	1.49793	1.36538	1.40403	1.66128
228	1.47995	1.26786	1.51058	1.08424	1.46059	1.6458
229	1.415	1.35214	1.44822	1.17393	1.46976	1.54628
230	1.40775	1.28074	1.39414	1.1687	1.53445	1.76783
231	1.55338	1.32529	1.5691	1.17677	1.51682	1.57518
232	1.50401	1.21622	1.5495	1.26705	1.52753	1.58329
233	1.41371	1.33191	1.48883	1.20084	1.52482	1.65089
234	1.39273	1.22944	1.40227	1.25868	1.39604	1.76173
235	1.4374	1.2532	1.43697	1.28491	1.44246	1.56885
236	1.40114	1.31727	1.46336	1.25063	1.43945	1.53389
237	1.53382	1.2575	1.46278	1.25438	1.32267	1.6155
238	1.51983	1.24091	1.57175	1.26082	1.26897	1.64087
239	1.48356	1.37053	1.51699	1.47699	1.1995	1.55928
240	1.47065	1.33831	1.47697	1.33766	1.27735	1.55548
241	1.38643	1.22901	1.40554	1.19122	1.39103	1.59251
242	1.47958	1.17634	1.47263	1.22375	1.36268	1.56173
243	1.48456	1.22197	1.48106	1.35611	1.35677	1.60531
244	1.45423	1.31974	1.46882	1.278	1.32184	1.51745
245	1.37682	1.31624	1.4128	1.36004	1.37813	1.59905
246	1.33008	1.2717	1.40307	1.43221	1.31713	1.54119
247	1.39993	1.19467	1.40173	1.37185	1.25991	1.57151
248	1.35217	1.24182	1.49173	1.34509	1.40194	1.7007
249	1.38398	1.14951	1.44947	1.40656	1.33305	1.58907
250	1.29092	1.16894	1.5818	1.53168	1.30361	1.63478
251	1.39883	1.22143	1.4304	1.39897	1.30311	1.6659
252	1.44846	1.14061	1.46947	1.45452	1.36108	1.56886
253	1.49666	1.22829	1.43471	1.33597	1.35172	1.54217
254	1.29255	1.18758	1.40016	1.30509	1.20504	1.48572
255	1.34309	1.24042	1.37087	1.32951	1.4156	1.49936
256	1.28745	1.23025	1.46551	1.38476	1.40408	1.45
257	1.30972	1.32841	1.53024	1.25124	1.36671	1.5067
258	1.33409	1.24524	1.43198	1.4747	1.37242	1.43594
259	1.29388	1.24671	1.41406	1.50137	1.4223	1.48625
260	1.23325	1.31146	1.47234	1.51082	1.40168	1.51101
261	1.23566	1.22379	1.37255	1.43887	1.18876	1.57006
262	1.25281	1.31816	1.45997	1.38648	1.28925	1.58362
263	1.39339	1.28878	1.41145	1.41055	1.21949	1.61971
264	1.51458	1.16447	1.34831	1.43906	1.25943	1.61019
265	1.32224	1.31488	1.36826	1.26769	1.29841	1.58651
266	1.47539	1.34733	1.35837	1.33568	1.23516	1.6845
267	1.43422	1.22878	1.37982	1.33849	1.39554	1.59394
268	1.37437	1.24257	1.39842	1.24968	1.35505	1.54676
269	1.38886	1.15418	1.4058	1.30353	1.24781	1.70451
270	1.37155	1.31985	1.51786	1.33519	1.35637	1.54348
271	1.35431	1.2427	1.39054	1.4117	1.24347	1.57001
272	1.44252	1.25148	1.43723	1.3759	1.23097	1.51918
273	1.39687	1.23764	1.45512	1.31877	1.14674	1.58771
274	1.41592	1.25253	1.42082	1.32373	1.19182	1.5751
275	1.35735	1.21365	1.44107	1.42601	1.24871	1.44188
276	1.38082	1.35388	1.509	1.37669	1.26712	1.56164
277	1.45322	1.32014	1.51734	1.41839	1.21454	1.50874
278	1.54269	1.17941	1.68179	1.38704	1.18332	1.4987
279	1.52783	1.3103	1.45064	1.35626	1.23339	1.43463
280	1.54975	1.35721	1.35951	1.38923	1.23906	1.52672
281	1.34435	1.43354	1.31305	1.3482	1.37052	1.56944
282	1.5562	1.23445	1.36997	1.32216	1.28508	1.48533
283	1.50368	1.28639	1.3902	1.46768	1.22382	1.48247
284	1.56154	1.19705	1.32546	1.38043	1.26716	1.57675
285	1.59871	1.17722	1.34201	1.37262	1.36357	1.48072
286	1.54402	1.12086	1.34595	1.39665	1.38467	1.40835
287	1.46031	1.14348	1.27111	1.44792	1.31523	1.5096
288	1.5555	1.30528	1.40783	1.46888	1.32221	1.46356
289	1.46037	1.22338	1.48757	1.46995	1.29315	1.51514
290	1.50422	1.15897	1.37539	1.4199	1.23429	1.48668
291	1.41691	1.20928	1.42045	1.40722	1.34647	1.53016
292	1.50924	1.23646	1.36566	1.40831	1.27605	1.7328
293	1.55473	1.19169	1.4933	1.45239	1.35515	1.66018
294	1.54322	1.19133	1.39406	1.31187	1.38153	1.53918
295	1.40478	1.2644	1.4041	1.48291	1.36003	1.54083
296	1.50185	1.20439	1.51001	1.58375	1.38008	1.59147
297	1.34966	1.20214	1.46738	1.44971	1.40941	1.49493
298	1.47422	1.22486	1.42449	1.50727	1.33035	1.59511
299	1.47151	1.28257	1.455	1.48006	1.34951	1.53789
300	1.46882	1.21574	1.5923	1.56903	1.37878	1.7216
301	1.47779	1.2103	1.50144	1.47495	1.29656	1.7164
302	1.48551	1.28393	1.50079	1.46433	1.39599	1.59049
303	1.52589	1.21572	1.45764	1.31538	1.27393	1.65907
304	1.49782	1.27539	1.53145	1.48534	1.40949	1.64628
305	1.6323	1.26859	1.42173	1.46052	1.53497	1.69773
306	1.51167	1.23059	1.44776	1.5064	1.50835	1.54918
307	1.4305	1.22824	1.39779	1.40605	1.45236	1.40278
308	1.52012	1.23793	1.42485	1.46224	1.44114	1.43461
309	1.4654	1.31757	1.48646	1.3739	1.50669	1.36598
310	1.51582	1.2494	1.49278	1.38454	1.53429	1.47882
311	1.46773	1.20363	1.53524	1.47447	1.29758	1.50943
312	1.50204	1.29033	1.42495	1.4187	1.38352	1.33863
313	1.42415	1.26917	1.56427	1.38921	1.48318	1.37611
314	1.4502	1.23995	1.58736	1.40679	1.40043	1.30012
315	1.3649	1.26982	1.5009	1.32553	1.25962	1.31573
316	1.43721	1.22623	1.56993	1.33045	1.42372	1.52603
317	1.49945	1.32199	1.55019	1.47564	1.42999	1.49551
318	1.52577	1.32994	1.42283	1.3925	1.54798	1.38794
319	1.37195	1.30459	1.41124	1.39957	1.46386	1.43069
320	1.38542	1.3352	1.34055	1.40566	1.49002	1.48921
321	1.45301	1.22067	1.36129	1.42397	1.38393	1.47777
322	1.54189	1.23795	1.39768	1.55718	1.27431	1.44206
323	1.55156	1.25931	1.40335	1.41475	1.47324	1.48434
324	1.52378	1.35242	1.44549	1.579	1.48102	1.55017
325	1.5537	1.32634	1.43315	1.4499	1.47433	1.48424
326	1.51241	1.23934	1.42937	1.48376	1.48037	1.44723
327	1.33778	1.25675	1.55279	1.59616	1.54541	1.41374
328	1.47648	1.23614	1.4586	1.56055	1.475	1.47356
329	1.40702	1.19739	1.44845	1.51061	1.4952	1.5241
330	1.49811	1.21182	1.48594	1.45643	1.43153	1.4713
331	1.46034	1.22499	1.51993	1.44335	1.62113	1.48681
332	1.41755	1.25286	1.54164	1.50124	1.43971	1.62336
333	1.43705	1.21198	1.44564	1.4559	1.60089	1.64814
334	1.44742	1.19537	1.46451	1.50035	1.59287	1.51779
335	1.33629	1.2352	1.53792	1.52837	1.46769	1.56884
336	1.48649	1.19627	1.5429	1.53288	1.54828	1.66742
337	1.4248	1.18793	1.44628	1.48843	1.53013	1.54313
338	1.47448	1.1934	1.44534	1.64261	1.3975	1.64257
339	1.34204	1.10901	1.40748	1.41302	1.52949	1.50322
340	1.3862	1.23936	1.45902	1.38639	1.41972	1.49802
341	1.40748	1.28525	1.46904	1.48159	1.44139	1.47552
342	1.47841	1.36248	1.42533	1.4856	1.42258	1.52312
343	1.51026	1.26063	1.41951	1.35366	1.42398	1.5424
344	1.43722	1.31686	1.53545	1.41913	1.44718	1.50369
345	1.42766	1.26102	1.48034	1.57066	1.54277	1.62323
346	1.45178	1.28257	1.46487	1.40746	1.4229	1.65142
347	1.41544	1.31592	1.46725	1.46849	1.38225	1.6258
348	1.40317	1.28373	1.51113	1.51432	1.39711	1.40262
349	1.47098	1.3588	1.54876	1.48253	1.43967	1.41
350	1.57245	1.35029	1.49181	1.40973	1.34482	1.65288
351	1.50897	1.23613	1.48822	1.4243	1.40728	1.43532
352	1.47822	1.23796	1.44565	1.41812	1.31802	1.4287
353	1.52068	1.17738	1.55881	1.50459	1.3521	1.48517
354	1.5292	1.20674	1.43133	1.38418	1.22276	1.42728
355	1.4748	1.31926	1.46889	1.46621	1.31027	1.44424
356	1.52106	1.30437	1.44584	1.56597	1.2701	1.6195
357	1.35312	1.24767	1.4956	1.49078	1.29338	1.35803
358	1.31648	1.15872	1.57156	1.52576	1.23403	1.32408
359	1.40692	1.32793	1.42807	1.5246	1.31221	1.43038
360	1.47136	1.23048	1.42315	1.51941	1.43215	1.47476
361	1.54309	1.28386	1.55384	1.53993	1.3586	1.498
362	1.50702	1.16485	1.37517	1.58652	1.20411	1.42599
363	1.54626	1.18584	1.44898	1.5494	1.32573	1.46582
364	1.5151	1.2232	1.36454	1.6302	1.30279	1.45702
365	1.58967	1.20624	1.4159	1.55206	1.30436	1.60744
366	1.37656	1.12459	1.45946	1.46601	1.3534	1.46297
367	1.4988	1.28303	1.41917	1.45109	1.30229	1.53064
368	1.47604	1.18358	1.42734	1.42917	1.33299	1.44785
369	1.30982	1.18298	1.60902	1.48853	1.27695	1.54438
370	1.40901	1.2358	1.44104	1.4779	1.28973	1.43349
371	1.36293	1.23035	1.4269	1.34781	1.34472	1.42148
372	1.53116	1.24423	1.45111	1.44658	1.35093	1.49246
373	1.38816	1.26082	1.35967	1.50146	1.41806	1.38843
374	1.34382	1.33241	1.40304	1.48977	1.41513	1.38242
375	1.37846	1.16394	1.44698	1.53769	1.36949	1.49166
376	1.4756	1.21248	1.43443	1.42003	1.45267	1.42865
377	1.40355	1.21016	1.3427	1.51154	1.44579	1.44788
378	1.47501	1.17024	1.48475	1.51054	1.43592	1.51914
379	1.46595	1.23991	1.40128	1.55026	1.38051	1.54205
380	1.45486	1.17662	1.47365	1.59015	1.51437	1.55691
381	1.48935	1.15146	1.51791	1.54348	1.44004	1.5231
382	1.50417	1.14957	1.53901	1.50544	1.48474	1.3898
383	1.59943	1.20513	1.34536	1.60741	1.56143	1.53764
384	1.63637	1.31688	1.64583	1.59569	1.49158	1.48933
385	1.57701	1.2544	1.46288	1.47585	1.66898	1.46945
386	1.53062	1.22824	1.47597	1.53442	1.51373	1.52249
387	1.51963	1.21545	1.48384	1.53597	1.54516	1.41761
388	1.49192	1.32342	1.46268	1.50471	1.3503	1.43801
389	1.50269	1.16295	1.42204	1.47956	1.51496	1.35357
390	1.4669	1.29764	1.43372	1.42652	1.3652	1.38205
391	1.40234	1.2781	1.52558	1.538	1.29213	1.35357
392	1.35211	1.23169	1.52471	1.47164	1.28276	1.28229
393	1.46685	1.29055	1.43066	1.68429	1.4185	1.25334
394	1.46219	1.28335	1.49104	1.76258	1.22153	1.28889
395	1.47372	1.31337	1.4786	1.6596	1.23041	1.43458
396	1.39376	1.29135	1.40713	1.45109	1.3249	1.28239
397	1.30781	1.29854	1.45451	1.5329	1.3832	1.30511
398	1.43602	1.24152	1.5367	1.5894	1.49032	1.15904
399	1.34522	1.24041	1.49502	1.4805	1.32254	1.18496
400	1.43984	1.37379	1.52088	1.46367	1.52092	1.2313
401	1.4248	1.22588	1.46713	1.52171	1.55646	1.22336
402	1.44224	1.22899	1.48227	1.41496	1.49341	1.34996
403	1.32144	1.26653	1.41147	1.59769	1.40889	1.35938
404	1.39079	1.19363	1.38401	1.61414	1.48983	1.31729
405	1.41135	1.27858	1.51051	1.51907	1.49142	1.20188
406	1.59085	1.23206	1.4938	1.46863	1.58407	1.23895
407	1.43344	1.28313	1.45623	1.47068	1.53782	1.39076
408	1.44077	1.2653	1.46177	1.51365	1.50059	1.54111
409	1.43268	1.2173	1.46381	1.50297	1.61938	1.33393
410	1.36859	1.26239	1.4951	1.51124	1.41953	1.2493
411	1.44871	1.24595	1.53518	1.30672	1.49424	1.43981
412	1.45425	1.36548	1.47944	1.50708	1.49218	1.26925
413	1.45523	1.46873	1.47712	1.36125	1.46043	1.42285
414	1.44309	1.30656	1.51493	1.32688	1.58411	1.43977
415	1.34438	1.22846	1.51814	1.29986	1.5106	1.36281
416	1.45638	1.38412	1.56092	1.28629	1.58406	1.38122
417	1.3276	1.24365	1.42606	1.311	1.57388	1.50603
418	1.41335	1.19129	1.39958	1.30812	1.63994	1.41018
419	1.50591	1.13231	1.33819	1.31777	1.57569	1.41109
420	1.50041	1.35241	1.36562	1.37834	1.47054	1.58725
421	1.49821	1.23046	1.43248	1.39476	1.65154	1.5894
422	1.43443	1.26869	1.4272	1.36571	1.74771	1.49844
423	1.32642	1.34146	1.38182	1.42052	1.56248	1.46274
424	1.36216	1.33124	1.42563	1.35159	1.78087	1.55548
425	1.39826	1.32707	1.38897	1.44645	1.65268	1.36251
426	1.51377	1.20091	1.52011	1.48079	1.59151	1.38778
427	1.36678	1.18694	1.51569	1.37697	1.51669	1.52725
428	1.46049	1.21654	1.54327	1.4202	1.63347	1.49388
429	1.38952	1.25763	1.42966	1.37096	1.64059	1.68942
430	1.39782	1.24117	1.46606	1.32059	1.62474	1.50348
431	1.37864	1.32383	1.39671	1.46544	1.45961	1.52151
432	1.39484	1.31458	1.32255	1.41846	1.49115	1.29507
433	1.31063	1.17547	1.44	1.35143	1.56137	1.49562
434	1.31274	1.28533	1.38541	1.38553	1.52864	1.56975
435	1.51383	1.37619	1.45437	1.48334	1.50588	1.57965
436	1.39133	1.331	1.46585	1.39071	1.56187	1.59529
437	1.34919	1.39259	1.42075	1.39328	1.49288	1.5536
438	1.42429	1.44333	1.40304	1.45397	1.58142	1.59566
439	1.25413	1.31419	1.46746	1.49797	1.36369	1.5889
440	1.3606	1.38916	1.70319	1.47602	1.44223	1.56117
441	1.33094	1.33245	1.45769	1.42379	1.34809	1.48508
442	1.46157	1.23655	1.47353	1.40292	1.50811	1.42709
443	1.63156	1.40031	1.52702	1.41589	1.37696	1.41393
444	1.30922	1.51721	1.55077	1.36131	1.39024	1.49212
445	1.2312	1.44967	1.44679	1.27961	1.39801	1.41377
446	1.42169	1.42499	1.48728	1.35959	1.35856	1.42393
447	1.40818	1.33746	1.49798	1.37021	1.46385	1.49291
448	1.40361	1.33941	1.50206	1.43735	1.36764	1.42102
449	1.40268	1.37239	1.41849	1.27714	1.49835	1.35681
450	1.38389	1.37379	1.52088	1.46367	1.52092	1.46503
451	1.43034	1.22588	1.46713	1.52171	1.55646	1.34115
452	1.35898	1.22899	1.48227	1.41496	1.49341	1.31919
453	1.43511	1.26653	1.41147	1.59769	1.40889	1.4702
454	1.38188	1.19363	1.38401	1.61414	1.48983	1.41895
455	1.42429	1.27858	1.51051	1.51907	1.49142	1.34837
456	1.44108	1.23206	1.4938	1.46863	1.58407	1.39619
457	1.4817	1.28313	1.45623	1.47068	1.53782	1.27234
458	1.4999	1.2653	1.46177	1.51365	1.50059	1.48136
459	1.52673	1.2173	1.46381	1.50297	1.61938	1.44843
460	1.43078	1.26239	1.4951	1.51124	1.41953	1.32284
461	1.46225	1.24595	1.53518	1.30672	1.49424	1.35307
462	1.50481	1.36548	1.47944	1.50708	1.49218	1.22262
463	1.45688	1.46873	1.47712	1.36125	1.46043	1.37705
464	1.42239	1.30656	1.51493	1.32688	1.58411	1.35433
465	1.57756	1.22846	1.51814	1.29986	1.5106	1.29658
466	1.51509	1.38412	1.56092	1.28629	1.58406	1.375
467	1.54122	1.24365	1.42606	1.311	1.57388	1.22623
468	1.63561	1.19129	1.39958	1.30812	1.63994	1.29845
469	1.46937	1.13231	1.33819	1.31777	1.57569	1.36852
470	1.35792	1.35241	1.36562	1.37834	1.47054	1.41034
471	1.42354	1.23046	1.43248	1.39476	1.65154	1.36104
472	1.38046	1.26869	1.4272	1.36571	1.74771	1.26592
473	1.65775	1.34146	1.38182	1.42052	1.56248	1.38777
474	1.60046	1.33124	1.42563	1.35159	1.78087	1.42707
475	1.62242	1.32707	1.38897	1.44645	1.65268	1.52487
476	1.37069	1.20091	1.52011	1.48079	1.59151	1.51984
477	1.52092	1.18694	1.51569	1.37697	1.51669	1.59169
478	1.4845	1.21654	1.54327	1.4202	1.63347	1.55705
479	1.56489	1.25763	1.42966	1.37096	1.64059	1.50756
480	1.66501	1.24117	1.46606	1.32059	1.62474	1.48004
481	1.45507	1.32383	1.39671	1.46544	1.45961	1.61738
482	1.41046	1.31458	1.32255	1.41846	1.49115	1.55387
483	1.43389	1.17547	1.44	1.35143	1.56137	1.41559
484	1.53709	1.28533	1.38541	1.38553	1.52864	1.34019
485	1.46243	1.37619	1.45437	1.48334	1.50588	1.3843
486	1.35185	1.331	1.46585	1.39071	1.56187	1.27403
487	1.43518	1.39259	1.42075	1.39328	1.49288	1.35833
488	1.37824	1.44333	1.40304	1.45397	1.58142	1.37393
489	1.5128	1.31419	1.46746	1.49797	1.36369	1.39098
490	1.46908	1.38916	1.70319	1.47602	1.44223	1.38633
491	1.39777	1.33245	1.45769	1.42379	1.34809	1.36031
492	1.46484	1.23655	1.47353	1.40292	1.50811	1.45121
493	1.43821	1.40031	1.52702	1.41589	1.37696	1.32564
494	1.49034	1.51721	1.55077	1.36131	1.39024	1.34873
495	1.51657	1.44967	1.44679	1.27961	1.39801	1.49701
496	1.46849	1.42499	1.48728	1.35959	1.35856	1.46805
497	1.47413	1.33746	1.49798	1.37021	1.46385	1.51786
498	1.55237	1.33941	1.50206	1.43735	1.36764	1.53897
499	1.4387	1.37239	1.41849	1.27714	1.49835	1.6145
Avarage RMSD	1.37147	1.21245	1.36004	1.3073	1.34088	1.35655
