# Supplementary material for: Identification of Potential Druggable Targets and Structure-Based Virtual Screening for Drug-like Molecules against the Shrimp Pathogen Enterocytozoon hepatopenaei
Source: Int J Mol Sci. 2023 Jan 11;24(2):1412. doi: 10.3390/ijms24021412 (PMC9867128; doi:10.3390/ijms24021412)
Supplement: Supplementary file 1 [file ijms-24-01412-s001.zip › Table S6.xlsx]

## Sheet: Aquaporin
	Table S6. Rg values of the protein–ligand complexes and proteins following 100 ns MD simulations
	CHEMBL3703838	ZINC000002243083	CHEMBL133039	CHEMBL3140193	CHEMBL2132563	Aquaporin
0	18.3796	18.1203	18.1608	18.1447	18.2259	18.1511
1	18.3775	17.9791	18.1731	18.3556	18.1699	18.2216
2	18.3736	18.1159	18.0852	18.2561	18.2427	18.1403
3	18.3259	18.1045	18.172	18.2248	18.2194	18.1322
4	18.3562	18.1553	18.3494	18.1314	18.2493	18.1391
5	18.291	18.2043	18.3344	18.2491	18.2551	18.0873
6	18.4935	18.2041	18.4234	18.0942	18.227	18.2661
7	18.3583	18.2063	18.3783	18.1454	18.0775	18.2025
8	18.4328	18.2712	18.3934	18.1154	18.1795	18.1738
9	18.3843	18.3194	18.3856	18.1432	18.2314	18.1177
10	18.4642	18.1947	18.3177	18.1655	18.1818	18.0954
11	18.3906	18.1082	18.448	18.1078	18.1424	18.189
12	18.392	18.1977	18.4064	18.1287	18.2967	18.1512
13	18.3195	18.0926	18.4889	18.037	18.1059	18.1339
14	18.4461	18.1976	18.1554	18.0926	18.3409	18.1246
15	18.4459	18.1895	18.331	17.9586	18.2735	18.0144
16	18.3266	18.2191	18.3382	18.1121	18.2577	17.9176
17	18.3842	18.0927	18.3783	17.9638	18.1504	17.9933
18	18.3926	18.0886	18.5189	18.1461	18.2319	18.0249
19	18.3252	18.1633	18.3206	17.9351	18.178	18.1003
20	18.4027	18.1887	18.412	18.0324	18.1924	17.9784
21	18.4101	18.1863	18.49	18.1221	18.2649	18.1261
22	18.3129	18.2343	18.5631	18.1323	18.2231	18.2096
23	18.4337	18.1325	18.3786	18.1733	18.2018	18.2105
24	18.4406	18.2167	18.6521	18.0877	18.2592	18.2325
25	18.3161	18.2287	18.6887	18.046	18.1497	18.2372
26	18.3214	18.1407	18.5931	18.0949	18.1997	18.1024
27	18.3897	18.0805	18.5306	17.9804	18.1876	18.1587
28	18.3696	18.1477	18.7475	17.9405	18.168	18.088
29	18.4434	18.1317	18.7766	18.1213	18.1326	18.1354
30	18.3388	18.1598	18.5916	17.9825	18.1161	18.2253
31	18.3065	18.1711	18.4998	18.1011	18.2302	18.355
32	18.3267	18.1065	18.6363	18.1261	18.248	18.34
33	18.355	18.1135	18.7244	18.0346	18.3307	18.2366
34	18.3669	17.982	18.7178	18.0931	18.2944	18.3779
35	18.3303	18.0636	18.5355	18.0736	18.3362	18.3066
36	18.4639	18.0445	18.4643	18.1631	18.208	18.1432
37	18.369	18.0028	18.402	18.1033	18.116	18.2145
38	18.3192	18.0189	18.3341	18.1353	18.1512	18.2036
39	18.1958	18.0069	18.2696	18.025	18.1873	18.2222
40	18.2083	17.962	18.2856	18.0584	18.1333	18.3362
41	18.2128	17.9566	18.5137	17.9863	18.0962	18.1592
42	18.2064	17.9611	18.2806	18.0561	18.158	18.2319
43	18.2709	18.0898	18.317	18.164	18.2429	18.2294
44	18.3198	18.0756	18.3088	18.0229	18.1441	18.3262
45	18.3347	18.0834	18.2873	18.0657	18.1203	18.2505
46	18.2854	18.0507	18.267	18.0189	18.0402	18.3368
47	18.1671	18.0668	18.3297	17.997	18.0989	18.1807
48	18.2456	18.11	18.4247	18.1508	18.0332	18.2024
49	18.2619	18.0204	18.4914	18.0372	18.087	18.3402
50	18.1321	18.0543	18.3909	18.1716	18.0668	18.3902
51	18.093	18.0885	18.5492	18.1088	17.933	18.1862
52	18.1159	18.1006	18.4887	18.0703	18.0212	18.3309
53	18.1449	18.0801	18.5528	17.9998	18.1033	18.2765
54	18.2459	18.0789	18.6718	18.0371	18.0491	18.1415
55	18.0993	18.0328	18.6645	18.0662	18.0913	18.2732
56	18.126	17.9978	18.6504	18.1006	18.0891	18.2089
57	18.1308	17.9778	18.7523	18.1131	18.1972	18.2817
58	18.1905	18.0772	18.5882	18.0009	18.0941	18.2003
59	18.1853	18.1326	18.4592	18.0596	18.0821	18.1369
60	18.2511	18.0252	18.5558	18.065	18.1136	18.0753
61	18.2027	18.0369	18.6089	18.1292	18.0848	18.1908
62	18.2641	18.0119	18.5996	18.1218	18.0485	18.0447
63	18.0981	17.9669	18.4731	18.0957	18.0835	18.1898
64	18.1296	17.9509	18.5039	18.0361	18.1005	18.0878
65	18.1239	17.8907	18.5548	18.056	18.1951	18.1145
66	18.3025	18.0918	18.4905	18.0098	18.0718	18.0692
67	18.0785	17.9304	18.5641	18.0025	17.9633	18.0036
68	18.0801	17.9829	18.4941	18.0542	17.9915	17.9905
69	18.1591	18.0354	18.3609	18.1004	18.134	18.1981
70	18.2028	18.0189	18.4242	18.1813	18.2605	18.3094
71	18.28	18.0134	18.327	18.0624	18.1846	18.2606
72	18.1399	18.0513	18.4223	18.1305	18.0757	18.3085
73	18.136	18.0383	18.3528	18.0693	17.9981	18.1207
74	18.102	17.9385	18.3741	18.1163	18.0344	18.1915
75	18.06	17.9889	18.3784	18.0656	17.9788	18.2461
76	18.0697	18.0181	18.2478	18.1336	18.0256	18.1994
77	18.0027	18.0993	18.3191	18.2556	17.8814	18.2357
78	18.0371	17.9984	18.2794	18.2336	17.8597	18.2529
79	17.9229	18.0631	18.2189	18.0717	17.8157	18.1247
80	17.9446	18.091	18.2146	18.093	17.8168	18.1607
81	17.9655	18.1298	18.0663	18.1256	17.9357	18.1249
82	17.9686	17.9457	18.212	18.2272	17.959	18.1297
83	17.9486	18.1042	18.1589	18.1892	17.9388	18.1725
84	17.9393	18.0769	18.0757	18.1404	17.7482	18.201
85	17.9255	18.0119	18.3231	18.1087	17.9127	18.1312
86	17.9746	18.0672	18.3133	18.1335	17.894	18.1186
87	17.9486	18.0132	18.3522	18.1271	17.877	18.22
88	17.9429	18.1269	18.3604	18.0587	18.0307	18.1925
89	17.9823	18.1023	18.3358	18.096	17.914	18.1669
90	18.1445	18.0889	18.3222	18.0812	18.0365	18.0741
91	18.0456	18.1382	18.2854	18.0747	17.9673	17.9956
92	17.922	18.1669	18.3185	18.1217	18.1142	18.0849
93	17.9145	18.1334	18.2991	18.1689	18.0408	18.0846
94	17.9885	18.0418	18.3957	18.1677	18.0823	18.0051
95	17.9972	18.1435	18.3212	18.1673	18.0306	17.962
96	17.947	18.0404	18.3672	18.2357	18.0138	18.0008
97	17.9593	18.0985	18.3525	18.1334	17.9725	18.0617
98	17.9175	18.1516	18.3934	18.0543	17.9254	18.0145
99	17.9839	18.2572	18.2403	18.1248	17.8966	18.1372
100	17.9815	18.0845	18.2191	18.1714	18.0211	18.0509
101	17.9738	18.1167	18.2829	18.1394	17.9868	18.0784
102	18.0364	18.2705	18.2559	18.1554	17.9727	18.1424
103	17.9531	18.161	18.1835	18.1027	18.0673	18.1051
104	17.8428	18.11	18.1932	18.1977	18.0577	18.1193
105	17.9195	18.0089	18.2591	18.0896	18.085	18.1358
106	18.0526	18.1444	18.2242	18.1154	18.0664	18.1075
107	17.9815	17.9862	18.2494	18.2033	18.038	18.1468
108	17.9753	18.104	18.4069	18.0928	17.9597	18.0276
109	17.9958	18.2216	18.2809	18.1551	18.0228	18.1412
110	17.923	18.1687	18.2865	18.1232	18.0524	18.3
111	17.8885	18.2366	18.2113	18.1374	17.9675	18.043
112	17.8683	18.0518	18.1631	18.3091	18.1383	18.0263
113	17.831	18.1814	18.3884	18.1518	18.0602	18.1076
114	17.8304	18.2336	18.4698	18.1071	18.0313	17.9498
115	17.8573	18.1283	18.5545	18.0761	17.9519	18.0951
116	17.9314	18.0545	18.5391	18.1539	18.0192	18.0801
117	17.9576	18.0303	18.544	18.2279	18.025	17.9588
118	17.8818	17.9805	18.437	18.2542	18.0447	18.0554
119	17.9438	18.1693	18.4293	18.1572	18.0206	17.9562
120	17.9506	18.2471	18.3735	18.2392	17.9586	18.0175
121	17.9793	18.125	18.5614	18.213	17.9409	18.0153
122	17.9241	18.0919	18.5198	18.1957	18.1008	18.1313
123	17.8952	18.1929	18.4218	18.1432	18.1612	18.0362
124	17.945	18.1222	18.4534	18.1517	17.964	17.9896
125	17.9234	18.195	18.5392	18.1882	18.0085	18.0025
126	17.9369	18.0642	18.3021	18.1494	18.0564	18.0958
127	18.0218	18.2874	18.347	18.2068	18.0466	18.0615
128	17.9794	18.1353	18.206	18.1947	17.9519	18.1179
129	18.0002	18.0875	18.3139	18.1364	17.9672	18.0311
130	17.9543	18.3316	18.2414	18.1408	17.9424	17.9555
131	17.9858	18.1814	18.1862	18.1519	17.9034	18.06
132	17.925	18.1535	18.2379	18.1545	17.9605	18.0435
133	17.9269	18.1554	18.4091	18.2777	17.9638	18.0237
134	17.9831	18.2615	18.2305	18.0321	17.7879	17.9838
135	17.966	18.2503	18.1301	18.1478	17.8033	17.9834
136	17.9445	18.1436	18.2932	18.2915	18.0412	18.1262
137	17.9786	18.1513	18.4144	18.2116	17.9994	18.0625
138	18.1558	18.0831	18.3952	18.0985	17.9542	18.087
139	17.909	18.2636	18.3464	18.1636	17.9435	18.1579
140	17.9814	18.0837	18.0831	18.1867	17.9307	18.142
141	18.0072	18.1056	18.1095	18.0371	17.9236	18.0777
142	18.0824	18.0917	18.0837	18.1585	17.9956	18.0883
143	18.0507	18.0844	18.2683	18.1074	17.885	17.9765
144	18.0005	18.1489	18.2489	18.0533	17.8751	18.0758
145	18.0543	18.1492	18.2723	18.0386	17.9234	17.9429
146	18.055	18.156	18.2551	18.1584	17.8683	18.0661
147	18.2275	18.1414	18.273	18.1295	17.8667	18.067
148	18.1545	18.0286	18.1928	18.0635	17.8834	17.9708
149	18.0573	18.0711	18.1673	18.1754	17.8639	18.0601
150	18.0887	18.0983	18.1633	18.1631	17.7464	18.0514
151	18.0721	18.0335	18.1466	18.0945	17.8041	18.0341
152	18.1058	18.0841	18.1316	18.0363	17.7686	17.9288
153	18.0416	18.07	18.0342	18.039	17.9125	18.0571
154	18.1184	18.0562	17.9919	18.1414	17.9824	18.0378
155	18.11	18.1008	17.9309	18.0124	17.9982	17.9365
156	18.0839	18.1596	18.1883	18.0844	18.0463	17.9881
157	18.1521	18.1483	18.0471	18.0728	17.908	17.9666
158	18.0951	18.1336	18.0371	18.1684	18.0197	18.115
159	18.0347	18.0818	18.061	18.1252	18.1542	18.075
160	18.1634	18.0938	18.0901	18.0681	18.0418	18.0243
161	18.0614	18.1519	18.1535	18.158	18.0689	17.9845
162	18.0379	18.1717	18.0338	18.1273	18.1767	18.1448
163	18.1319	18.1448	18.0213	18.0996	18.1175	18.066
164	18.0402	18.139	18.029	18.0814	17.9912	18.018
165	17.9653	18.0991	17.995	18.1356	17.9683	18.0479
166	17.9697	18.0796	18.1348	18.1155	17.9961	18.0519
167	18.0268	18.143	18.1951	18.1644	17.9506	18.0846
168	18.0217	18.2017	18.169	18.1824	18.0616	18.0598
169	17.8951	18.1865	18.2531	18.1229	18.0156	18.0537
170	18.1254	18.2148	18.2045	18.1592	18.052	18.104
171	18.0131	18.1104	18.2135	18.0712	18.0829	18.0356
172	18.0181	17.9891	18.0962	18.0766	18.1304	18.1935
173	18.0052	18.1015	18.2058	18.1344	18.0796	18.1861
174	18.0903	18.1246	18.2236	18.0888	17.9938	18.1847
175	18.1142	18.1611	18.1934	17.9675	18.1788	18.141
176	18.0321	18.2108	18.1812	18.0235	17.8743	18.1207
177	17.9502	18.194	18.2038	18.2336	18.0251	18.1704
178	17.9838	18.1583	18.1196	18.2162	17.8489	18.0702
179	18.0865	18.0839	18.0024	18.1008	17.9149	18.1577
180	18.034	18.0985	18.1014	18.147	17.947	18.2776
181	18.0552	18.1467	18.0945	18.1725	17.981	18.237
182	17.9884	18.1426	18.161	18.1224	17.91	18.134
183	18.0356	18.1324	18.1569	18.0916	17.8995	18.076
184	18.0658	18.0559	18.2046	18.0652	17.9587	18.1544
185	17.8803	18.157	18.0503	18.0104	17.8737	18.0317
186	17.9357	18.2188	18.0966	18.0173	17.8712	18.113
187	17.9333	18.1819	18.1682	18.0899	17.8935	18.0435
188	17.9415	18.0383	18.1165	17.98	17.9679	17.9704
189	17.9081	18.0299	18.1135	17.9921	17.9273	18.0835
190	17.9722	18.1956	18.1288	17.8832	17.8606	18.0753
191	17.9135	18.1506	18.1158	18.0527	17.8978	17.9134
192	17.9813	18.0385	18.0989	17.9949	17.9532	17.9961
193	17.9112	18.1036	18.1035	18.1294	17.9284	18.0769
194	17.926	18.1056	17.9769	18.0398	17.9615	18.0129
195	17.9439	18.182	17.9963	18.0648	18.0224	18.0376
196	17.8411	18.1458	17.9761	18.2058	18.028	17.9761
197	18.0195	18.1166	18.0335	18.0505	17.8733	18.0854
198	17.9995	18.123	18.0396	18.0829	17.9353	18.1753
199	17.9379	18.1646	18.1316	18.0032	17.8252	18.1374
200	18.0009	18.0757	18.0945	18.0871	17.8135	18.0688
201	18.0395	18.0106	18.2144	18.1504	17.8421	18.1139
202	17.9868	18.0869	18.2383	18.2293	17.7918	18.0747
203	17.9913	18.2166	18.2407	18.2287	17.7598	18.1282
204	17.9933	18.1913	18.1327	18.2256	17.8087	18.1275
205	17.9798	18.047	18.1256	18.1972	17.8603	18.1908
206	17.9813	18.2133	18.2782	18.1912	17.8343	18.1601
207	17.9648	18.1236	18.3265	18.2067	17.8747	18.2093
208	17.94	18.2526	18.2202	18.176	17.9034	18.2643
209	17.9722	18.0753	18.2803	18.2276	17.8344	18.0518
210	17.9992	18.0953	18.107	18.1842	17.9607	18.1285
211	18.1187	18.1884	18.3753	18.1521	17.9573	18.0766
212	18.0579	18.2259	18.1976	18.0566	17.8643	18.1305
213	17.9283	18.0599	18.2378	18.0352	17.973	18.0603
214	17.9889	18.1878	18.0976	18.157	17.8884	17.9987
215	17.9901	18.1466	18.3682	18.2323	17.7854	18.117
216	18.0295	18.1059	18.1286	18.2266	17.8333	18.0707
217	18.1612	18.1302	18.0955	18.1482	17.8192	18.071
218	18.1702	18.1678	18.1809	18.2013	17.8791	18.0916
219	18.1659	18.098	18.244	18.1982	17.8302	18.1126
220	18.1151	17.995	18.3776	18.3409	17.8257	18.2183
221	18.2234	18.0955	18.3221	18.3311	17.9495	18.1068
222	18.1501	18.2054	18.2379	18.2187	17.8869	18.1173
223	18.1647	18.1604	18.1706	18.2102	17.8074	18.0721
224	18.1233	18.0758	18.1558	18.4392	17.7789	18.1276
225	18.322	18.0932	18.3972	18.3705	17.8643	17.9632
226	18.1351	18.0576	18.2372	18.3842	17.8496	18.0669
227	18.2038	18.0508	18.1942	18.2461	17.8391	18.0797
228	18.1952	18.2194	18.4358	18.3706	17.8457	18.1515
229	18.156	18.1027	18.4314	18.2638	17.9155	18.1601
230	18.2014	18.2274	18.3166	18.3818	17.9517	18.2488
231	18.1576	18.1287	18.3214	18.286	17.8846	18.1429
232	18.1496	18.0272	18.3768	18.1126	17.9083	18.1919
233	18.1495	18.0735	18.3356	18.2592	17.8375	18.2013
234	18.2409	18.1126	18.2768	18.3332	17.776	18.2042
235	18.2116	18.172	18.2946	18.4261	17.7229	18.1554
236	18.2866	18.164	18.1967	18.3678	17.7564	18.1323
237	18.3506	18.1196	18.3867	18.4152	17.8534	18.0063
238	18.3824	18.1138	18.2393	18.5932	17.9593	18.1096
239	18.2932	18.0694	18.1729	18.4587	17.8371	17.959
240	18.3052	18.1164	18.3304	18.4198	17.7669	18.0224
241	18.1004	18.2088	18.2629	18.4556	17.7141	18.1811
242	17.9454	18.1396	18.3174	18.4139	17.7577	18.0548
243	18.0966	18.0915	18.2875	18.3106	17.7088	18.2539
244	17.9779	18.1533	18.1507	18.3647	17.8342	18.1744
245	18.0938	18.0969	18.2972	18.4612	17.867	18.0762
246	18.2196	18.1887	18.3195	18.3568	17.8859	18.157
247	18.2643	18.2048	18.2677	18.3466	17.8377	18.2032
248	18.0945	18.2702	18.08	18.346	17.9275	18.1552
249	18.1235	18.1464	18.2693	18.2833	17.8571	18.1599
250	18.1386	18.2421	18.1979	18.2393	17.6916	18.3056
251	18.1144	18.2194	18.3395	18.2821	17.8285	18.0593
252	18.2118	18.2235	18.3305	18.343	17.8339	18.1976
253	18.1467	18.2406	18.2255	18.3432	17.7453	18.0599
254	18.1124	18.053	18.2502	18.3195	17.7768	18.1251
255	18.0939	18.1742	18.1647	18.3454	17.8501	18.099
256	18.2369	18.072	18.1533	18.2723	17.8227	18.1543
257	18.255	18.16	18.198	18.3392	17.7718	18.2502
258	18.1156	18.1337	18.1854	18.3274	17.7745	18.172
259	18.2409	18.1379	18.1305	18.3921	17.762	18.108
260	18.1471	18.2163	18.1705	18.3489	17.6989	18.0751
261	18.2635	18.0237	18.0606	18.3984	17.7527	18.1616
262	18.3357	18.1072	18.0812	18.3093	17.8559	18.1491
263	18.2185	18.1253	18.0831	18.3394	17.9263	18.0555
264	18.2392	18.1783	18.0982	18.3859	17.9849	18.1186
265	18.2811	18.3011	18.2501	18.2962	17.7937	18.2288
266	18.2573	18.2231	18.1771	18.3546	17.7594	18.1436
267	18.193	18.21	18.2149	18.3487	17.7681	18.1248
268	18.1125	18.1909	18.0535	18.3988	17.8714	18.157
269	18.1993	18.207	18.1778	18.3089	17.8778	18.1016
270	18.2848	18.163	18.1849	18.2625	17.775	18.207
271	18.1992	18.3418	18.1134	18.3066	17.7197	18.1471
272	18.179	18.1732	18.2063	18.2181	17.739	18.0989
273	18.2302	18.2263	18.1164	18.1826	17.7773	18.2577
274	18.349	18.2602	18.1946	18.193	17.7375	18.0047
275	18.2208	18.1448	18.1153	18.2402	17.7458	18.1201
276	18.2211	18.1587	18.012	18.3364	17.7428	18.0697
277	18.2172	18.1835	18.1038	18.1651	17.7934	18.1879
278	18.2437	18.1403	18.065	18.1669	17.9638	18.003
279	18.211	18.1083	18.3535	18.1211	17.8686	17.9881
280	18.1454	18.1316	18.149	18.1576	17.8565	17.9815
281	18.2386	18.2592	18.3151	18.0605	17.8035	17.9737
282	18.2742	18.1014	18.3351	18.1524	17.9003	18.1121
283	18.2335	18.1841	18.3973	18.2873	17.893	18.0857
284	18.1441	18.262	18.2365	18.1691	17.8759	18.0596
285	18.1124	18.2278	18.3147	18.2621	17.9147	18.0835
286	18.152	18.1826	18.4496	18.1725	17.891	17.973
287	18.3035	18.1193	18.2426	18.2376	17.8101	18.1109
288	18.1843	18.1929	18.2215	18.1807	17.8752	18.0541
289	18.1988	18.1269	18.1597	18.2256	17.7645	18.0742
290	18.2472	18.2293	18.0959	18.1317	17.8438	18.0405
291	18.314	18.2774	18.1037	18.1929	17.7037	18.1502
292	18.2447	18.1537	18.1183	18.0935	17.7816	18.0775
293	18.1529	18.1421	18.2678	18.0782	17.8235	18.1347
294	18.1904	18.2041	18.2142	18.0584	17.7977	18.0425
295	18.2108	18.0999	18.1532	18	17.6261	18.1166
296	18.1755	18.1203	18.3631	17.9949	17.7851	18.1646
297	18.2715	18.087	18.2795	18.0694	17.7312	18.1008
298	18.1623	18.2288	18.1866	18.0974	17.6662	18.1443
299	18.1662	18.1607	18.3465	18.0083	17.675	18.0853
300	18.2471	18.2244	18.3059	18.0488	17.703	18.1037
301	18.2112	18.1339	18.3547	18.1211	17.7693	18.0378
302	18.1893	18.06	18.3407	18.0853	17.7612	18.059
303	18.1844	18.1799	18.2857	18.1933	17.7846	18.0289
304	18.2351	18.1893	18.441	18.117	17.7325	18.1188
305	18.2418	18.1445	18.3146	18.0688	17.735	18.0692
306	18.2698	18.1459	18.3832	18.1078	17.6561	18.081
307	18.2689	18.1432	18.2891	18.0056	17.7834	18.004
308	18.2218	18.079	18.3653	18.0957	17.7006	18.1452
309	18.3279	18.1909	18.2939	18.1268	17.8949	18.0993
310	18.3509	18.0533	18.1903	18.2382	17.7762	18.0709
311	18.3514	18.1424	18.1731	18.1725	17.7815	18.2204
312	18.2155	18.0753	18.0913	18.1995	17.8241	18.1201
313	18.2336	18.1035	18.205	18.1848	17.8687	18.1188
314	18.2989	18.1788	18.2624	18.2095	17.9814	18.1047
315	18.2192	18.1666	18.2027	18.24	17.8605	18.0658
316	18.2807	18.0782	18.3401	18.3064	17.9535	18.0446
317	18.223	18.0747	18.1015	18.3606	17.9174	18.1456
318	18.2452	18.0907	18.0147	18.2827	17.7787	18.107
319	18.2054	18.1461	18.0115	18.2719	17.7916	18.114
320	18.1906	18.1398	18.0225	18.1736	17.7992	18.1723
321	18.1961	18.1707	17.9748	18.3523	17.8074	18.103
322	18.1142	18.0926	18.1034	18.3174	17.7842	18.0644
323	18.2037	18.1469	18.0459	18.1913	17.8491	18.1928
324	18.1023	18.1554	18.2541	18.2208	17.7446	18.1249
325	18.3391	18.1488	18.0909	18.2536	17.7094	18.128
326	18.2222	18.0006	18.1692	18.2561	17.8284	18.0302
327	18.3297	18.1481	18.1929	18.1686	17.7999	18.1485
328	18.3976	18.1193	18.147	18.1294	17.709	18.0997
329	18.2312	18.0913	18.0454	18.1352	17.8049	18.0387
330	18.2697	18.2239	18.1674	18.1317	17.9531	17.9867
331	18.2217	18.1793	18.2116	18.2727	17.9151	18.1799
332	18.1966	18.1745	18.2953	18.3177	17.9236	18.0213
333	18.3702	18.2201	18.2762	18.2665	17.8722	18.1152
334	18.2719	18.1303	18.3285	18.2313	17.9165	18.117
335	18.3398	18.0729	18.2127	18.2685	17.8211	18.1679
336	18.2035	18.0398	18.1312	18.1742	17.8055	18.1289
337	18.0794	18.1246	18.0684	18.1335	17.8773	18.1399
338	18.1278	18.041	18.161	18.159	17.7993	18.1126
339	18.1008	18.0221	18.2315	18.2092	17.8953	18.1706
340	18.1883	18.0711	18.2462	18.0244	17.7586	18.1444
341	18.0562	18.1309	18.1215	18.143	17.8633	18.0965
342	18.1974	18.2034	18.2485	18.0856	17.8753	18.1675
343	18.041	18.2671	18.2401	18.1559	17.906	18.1298
344	18.0366	18.1765	18.1278	18.1897	17.8243	18.1359
345	18.2062	18.163	18.3111	18.1823	17.8098	18.1456
346	18.1155	18.1593	18.2368	18.1654	17.9512	18.2082
347	18.0412	18.2478	18.1458	18.1796	17.8852	18.1302
348	18.2509	18.2491	18.3308	18.1109	17.8433	18.0381
349	18.2346	18.1395	18.18	18.1961	17.7469	18.1039
350	18.2209	18.1505	18.2955	18.066	17.7797	18.1598
351	18.2952	18.1057	18.2383	18.1394	17.7582	18.1054
352	18.2952	18.0595	18.3323	18.1339	17.9125	18.1055
353	18.2415	18.1838	18.3514	18.3309	17.8926	18.1355
354	18.2463	18.2265	18.3976	18.169	17.9034	18.1108
355	18.1112	18.2687	18.3352	18.1057	17.7235	17.9946
356	18.3001	18.1804	18.4157	18.2231	17.7833	18.0477
357	18.2932	18.2011	18.3678	18.0934	17.7943	17.9683
358	18.1907	18.108	18.2675	18.0734	17.7083	18.0538
359	18.2653	18.3147	18.2484	18.1256	17.7249	17.9294
360	18.2395	18.2677	18.1342	18.1354	17.9193	18.0108
361	18.2873	18.3042	18.1433	18.1017	17.8213	18.141
362	18.3134	18.1434	18.2	18.0609	17.8733	18.0753
363	18.1894	18.1142	18.2418	18.0817	17.6994	18.071
364	18.3987	18.1629	18.1596	18.2258	17.7818	18.1067
365	18.3549	18.2513	18.2112	18.283	17.7714	17.9184
366	18.2483	18.1708	18.2336	18.1537	17.7514	18.0882
367	18.3922	18.2461	18.2854	18.2475	17.6702	17.99
368	18.3909	18.2596	18.2042	18.1313	17.8376	17.9385
369	18.2217	18.1915	18.1573	18.1567	17.8965	17.9529
370	18.3738	18.2634	18.3151	18.2589	17.9516	17.9545
371	18.2567	18.24	18.2665	18.2596	17.9407	18.0359
372	18.2809	18.1605	18.291	18.3485	17.7895	18.084
373	18.2974	18.2	18.2317	18.2469	17.7425	18.0478
374	18.2873	18.0504	18.1646	18.1169	17.7747	18.1384
375	18.3449	18.1566	18.0856	18.2696	17.7565	18.0828
376	18.3835	18.1	18.0792	18.3361	17.7079	18.1276
377	18.3359	18.3054	18.2503	18.3673	17.8364	18.0213
378	18.3537	18.2245	18.0866	18.4438	17.7331	18.0664
379	18.348	18.1561	18.1979	18.1592	17.7073	18.019
380	18.3573	18.1047	18.157	18.3198	17.6118	17.9442
381	18.2824	18.1933	18.3247	18.2078	17.7747	18.0621
382	18.3146	18.2332	18.3881	18.1361	17.7626	18.058
383	18.2916	18.1841	18.2231	18.1973	17.7395	17.9801
384	18.2738	18.0773	18.2038	18.2166	17.7248	17.9815
385	18.3323	18.1407	18.1809	18.2302	17.8061	18.0594
386	18.3148	18.1488	18.2498	18.2072	17.7363	18.2215
387	18.3501	18.2019	18.1776	18.2037	17.7387	18.009
388	18.3136	18.0854	18.3524	18.1766	17.6586	18.0718
389	18.2055	18.0866	18.2547	18.1173	17.8373	18.1206
390	18.2372	18.1396	18.3229	18.2423	17.7644	18.1673
391	18.2035	18.2208	18.4369	18.0994	17.7583	18.0668
392	18.2833	18.2575	18.3571	18.1575	17.7475	18.0562
393	18.3501	18.1408	18.3631	18.2852	17.6144	18.068
394	18.2949	18.2128	18.2717	18.2789	17.6578	17.9899
395	18.3107	18.1185	18.269	18.3394	17.736	18.0516
396	18.2748	18.2129	18.1611	18.2358	17.6034	18.0957
397	18.2994	18.1903	18.1787	18.2116	17.7315	18.0497
398	18.2781	18.1372	18.284	18.2259	17.6805	18.0787
399	18.2836	18.1527	18.2578	18.3096	17.5833	18.0111
400	18.2267	18.2017	18.2652	18.3063	17.5035	18.058
401	18.298	18.0609	18.3241	18.2832	17.6478	18.1428
402	18.2856	18.3248	18.1662	18.4059	17.6884	18.144
403	18.3012	18.1343	18.3088	18.2254	17.6701	18.0789
404	18.2159	18.1072	18.2724	18.358	17.6941	18.3087
405	18.2021	18.108	18.2908	18.278	17.6449	18.2349
406	18.2312	18.1147	18.3013	18.3048	17.6056	18.1932
407	18.2781	18.151	18.2604	18.2489	17.579	18.1865
408	18.2085	18.1495	18.2343	18.2466	17.646	18.1329
409	18.2901	18.2334	18.2198	18.3379	17.7425	18.1567
410	18.2437	18.1702	18.2032	18.2522	17.8658	18.1784
411	18.2105	18.1948	18.4793	18.2978	17.7855	18.1959
412	18.2006	18.089	18.3871	18.3347	17.8416	18.091
413	18.2116	18.2025	18.3513	18.3139	17.7326	18.1497
414	18.2071	18.2127	18.5791	18.2212	17.7527	18.2117
415	18.2561	18.1854	18.4071	18.3499	17.8499	18.0845
416	18.1463	18.2247	18.4629	18.3281	17.742	18.0798
417	18.286	18.1212	18.4767	18.2208	17.7841	18.0384
418	18.174	18.1198	18.5128	18.1767	17.8306	18.1958
419	18.2411	18.1432	18.4884	18.3831	17.7894	18.0801
420	18.2002	18.2623	18.4384	18.3097	17.7683	18.0569
421	18.275	18.1328	18.3419	18.3228	17.8048	18.0737
422	18.243	18.2043	18.4246	18.271	17.8278	18.1392
423	18.2448	18.2585	18.3906	18.2665	17.8037	18.1206
424	18.2002	18.2648	18.2962	18.1936	17.7583	18.1225
425	18.2512	18.235	18.4325	18.2348	17.8716	18.1241
426	18.3332	18.2171	18.3588	18.2167	17.7895	18.0603
427	18.3183	18.1811	18.4127	18.2628	17.8054	18.2013
428	18.3191	18.2093	18.4537	18.3806	17.8224	18.2167
429	18.3127	18.0632	18.509	18.3403	17.7652	18.2056
430	18.3652	18.2264	18.5577	18.2811	17.6399	18.2939
431	18.3538	18.2453	18.4896	18.3747	17.7815	18.0865
432	18.3742	18.1828	18.53	18.3681	17.7751	18.1017
433	18.3255	18.2679	18.5845	18.3142	17.7789	18.1318
434	18.3375	18.1668	18.5357	18.1656	17.8119	18.0178
435	18.3225	18.179	18.3969	18.2648	17.8813	17.9953
436	18.3385	18.1928	18.527	18.1995	17.8286	18.022
437	18.3903	18.1405	18.5362	18.3663	17.8663	18.1505
438	18.334	18.0437	18.5151	18.2038	17.8918	18.1418
439	18.3668	18.2912	18.4421	18.338	17.8365	18.0333
440	18.3887	18.2523	18.4461	18.1695	17.8034	18.1081
441	18.2924	18.3739	18.467	18.2389	17.8716	18.0516
442	18.3177	18.3246	18.5083	18.3015	17.8031	18.0545
443	18.3233	18.3108	18.4871	18.1808	17.7379	18.1055
444	18.3133	18.2905	18.4521	18.1719	17.8824	18.0454
445	18.343	18.1708	18.5405	18.2748	17.8472	18.1201
446	18.3188	18.3541	18.4192	18.1808	17.873	18.1427
447	18.3521	18.1618	18.4418	18.2135	17.8413	18.1589
448	18.3608	18.1014	18.5217	18.2834	17.7827	18.2105
449	18.357	18.0802	18.4755	18.1673	17.712	18.073
450	18.3476	18.2017	18.2652	18.3063	17.7512	18.0603
451	18.3437	18.0609	18.3241	18.2832	17.8661	18.1927
452	18.3693	18.3248	18.1662	18.4059	17.8607	18.0453
453	18.3789	18.1343	18.3088	18.2254	17.8185	17.9729
454	18.3415	18.1072	18.2724	18.358	17.7104	18.1863
455	18.3405	18.108	18.2908	18.278	17.8192	18.0359
456	18.3127	18.1147	18.3013	18.3048	17.7908	18.1135
457	18.36	18.151	18.2604	18.2489	17.8009	18.1411
458	18.366	18.1495	18.2343	18.2466	17.8189	18.0862
459	18.331	18.2334	18.2198	18.3379	17.7322	18.1101
460	18.3579	18.1702	18.2032	18.2522	17.7231	18.1734
461	18.3785	18.1948	18.4793	18.2978	17.6751	18.308
462	18.3526	18.089	18.3871	18.3347	17.8404	18.1645
463	18.3578	18.2025	18.3513	18.3139	17.8105	18.2021
464	18.3505	18.2127	18.5791	18.2212	17.7917	18.0081
465	18.3404	18.1854	18.4071	18.3499	17.721	18.0784
466	18.3419	18.2247	18.4629	18.3281	17.7745	18.1013
467	18.3201	18.1212	18.4767	18.2208	17.7184	18.0083
468	18.3262	18.1198	18.5128	18.1767	17.6432	18.2001
469	18.2708	18.1432	18.4884	18.3831	17.7176	18.1502
470	18.3678	18.2623	18.4384	18.3097	17.7329	17.9136
471	18.3199	18.1328	18.3419	18.3228	17.6022	18.1768
472	18.3049	18.2043	18.4246	18.271	17.6277	17.992
473	18.2529	18.2585	18.3906	18.2665	17.5342	17.9885
474	18.2715	18.2648	18.2962	18.1936	17.5852	17.9449
475	18.2717	18.235	18.4325	18.2348	17.5339	18.0026
476	18.2089	18.2171	18.3588	18.2167	17.662	18.1147
477	18.2668	18.1811	18.4127	18.2628	17.599	17.9969
478	18.2203	18.2093	18.4537	18.3806	17.7089	18.0367
479	18.2191	18.0632	18.509	18.3403	17.774	18.0821
480	18.2556	18.2264	18.5577	18.2811	17.8295	18.03
481	18.2791	18.2453	18.4896	18.3747	17.9317	18.0956
482	18.2738	18.1828	18.53	18.3681	17.8975	18.0961
483	18.2157	18.2679	18.5845	18.3142	17.9241	18.0648
484	18.1962	18.1668	18.5357	18.1656	17.8385	18.0742
485	18.1739	18.179	18.3969	18.2648	17.8815	18.0356
486	18.2851	18.1928	18.527	18.1995	17.8713	18.1008
487	18.1998	18.1405	18.5362	18.3663	17.8462	17.9624
488	18.1389	18.0437	18.5151	18.2038	17.8463	17.9966
489	18.2102	18.2912	18.4421	18.338	17.8313	17.9879
490	18.2312	18.2523	18.4461	18.1695	17.7652	18.0919
491	18.21	18.3739	18.467	18.2389	17.7112	18.0417
492	18.2117	18.3246	18.5083	18.3015	17.8305	18.121
493	18.2715	18.3108	18.4871	18.1808	17.7757	17.9705
494	18.2884	18.2905	18.4521	18.1719	17.7168	17.9697
495	18.2641	18.1708	18.5405	18.2748	17.8392	18.0247
496	18.2202	18.3541	18.4192	18.1808	17.8129	18.0213
497	18.22	18.1618	18.4418	18.2135	17.7426	18.0592
498	18.2445	18.1014	18.5217	18.2834	17.7645	17.9902
499	18.2794	18.0802	18.4755	18.1673	17.7088	18.039
Average RG	18.1813	18.145	18.2984	18.1894	17.8925	18.1056

## Sheet: CTP synthase
	CHEMBL48494	CHEMBL1162979	CHEMBL133039	CHEMBL525202	CHEMBL1091856	CTP synthase
0	24.8856	24.8632	24.8888	24.8985	24.7163	24.7655
1	24.8728	24.8072	24.863	24.9003	24.7405	24.7969
2	24.9011	24.8639	24.8533	24.7574	24.876	24.8299
3	25.0542	24.9322	24.7196	24.8329	24.756	24.8074
4	25.0861	24.7942	24.8404	24.8984	24.9745	24.8278
5	25.1814	24.9682	24.8138	24.8458	25.0278	24.7721
6	24.9725	24.9316	24.8796	24.8243	25.1616	24.7314
7	25.0542	25.0297	24.7575	24.9254	24.8797	24.7935
8	24.9464	24.9314	24.8816	24.9243	25.0167	24.8913
9	24.8793	24.9616	24.8729	24.9757	25.0267	25.022
10	25.0423	24.9752	24.9521	25.0571	25.0753	25.0886
11	24.8872	25.1333	24.8639	25.0737	25.0033	24.9016
12	24.8506	25.2361	24.8382	25.0775	25.0763	24.9364
13	24.7997	25.115	24.8891	24.9148	25.0797	24.8891
14	24.83	25.1168	24.8429	25.058	24.9695	24.9929
15	24.9349	25.1295	24.8735	25.085	25.0659	24.9765
16	24.9118	24.9357	24.9264	25.0749	25.0103	24.9315
17	24.8192	25.0322	24.9493	24.9573	24.9953	25.0605
18	24.8635	25.0527	25.0242	24.846	24.9595	25.0186
19	24.8368	25.044	25.0138	24.9023	24.8884	25.0421
20	24.7631	24.9624	24.8956	25.0894	24.9759	25.1235
21	24.7694	24.9099	24.8984	25.1643	24.9578	25.0138
22	24.8522	25.0875	24.9423	25.1081	24.8587	24.9477
23	24.8738	25.0629	24.982	25.231	24.921	25.0266
24	24.9351	25.2472	24.9403	25.003	24.9527	24.9729
25	24.8784	25.2469	24.772	25.1006	24.8203	24.9198
26	24.8727	25.2125	24.783	25.1405	25.1656	24.994
27	24.8195	25.1621	24.8327	25.0256	24.992	24.8364
28	24.811	25.1343	25.0062	25.0494	25.0297	25.0004
29	24.9691	25.1974	25.0489	25.0907	25.1042	24.9337
30	24.9756	25.1277	24.8231	25.0474	25.1464	25.0271
31	24.8685	25.1596	24.995	25.0227	25.0527	24.982
32	24.8703	25.2377	24.9784	25.0677	25.0436	25.045
33	24.7792	25.2644	24.9627	25.1642	24.9693	24.9918
34	25.014	25.2403	24.9178	25.0532	24.9082	25.0814
35	24.8498	25.228	25.0069	25.0558	24.8955	25.0868
36	24.7809	25.3186	24.9881	25.1331	25.0933	25.0446
37	24.9482	25.242	25.0286	25.1376	24.9377	24.9795
38	24.9856	25.3404	25.0283	25.1413	24.8908	24.928
39	24.9605	25.3517	25.0502	25.167	24.9825	24.8963
40	24.9749	25.3261	24.9753	25.2741	25.0297	24.9183
41	24.8313	25.1741	24.8972	25.3272	25.0961	25.1937
42	24.7968	25.2657	25.0335	25.376	25.2056	25.1172
43	24.7884	25.262	24.9117	25.3147	25.1233	24.9775
44	24.8727	25.4172	25.0033	25.2529	25.1795	24.9803
45	24.9206	25.3531	25.0139	25.0694	25.0164	24.8951
46	24.832	25.3959	25.1513	25.2078	24.9329	24.9899
47	24.8166	25.36	25.0442	25.2212	24.7791	24.9998
48	24.861	25.3818	24.9844	25.2572	24.9589	25.0267
49	24.8194	25.389	24.9792	25.3698	24.9102	25.1196
50	24.8886	25.2811	25.1086	25.2871	25.0609	25.1304
51	25.0915	25.3156	24.9782	25.2164	25.0339	25.0518
52	25.0902	25.2936	24.9934	25.4109	24.9405	25.1067
53	24.8884	25.3106	24.972	25.3241	24.9195	25.0644
54	24.9901	25.3251	24.9946	25.2851	24.9379	24.9865
55	24.9642	25.3111	24.9786	25.257	24.9007	25.17
56	25.0085	25.354	25.1105	25.2485	24.9648	24.7917
57	24.9973	25.4103	25.005	25.2003	24.9252	25.1128
58	25.0795	25.463	25.1825	25.2226	24.9749	25.0622
59	25.0385	25.3114	24.9799	25.2534	24.9704	25.0968
60	24.9503	25.4075	24.8726	25.2876	24.9413	25.0659
61	24.9295	25.4613	24.9766	25.1597	25.0533	24.9936
62	24.9464	25.4412	24.848	25.1551	24.9243	25.1769
63	25.046	25.366	24.9742	25.0798	24.9109	25.0979
64	24.9995	25.4122	25.0237	25.1157	24.9787	25.0743
65	24.9137	25.479	25.0589	25.2577	24.922	25.1569
66	24.8653	25.4459	25.0516	25.1629	24.8956	25.0753
67	24.8905	25.4492	25.0878	25.2014	24.9606	25.1455
68	24.9037	25.4769	25.0194	25.2942	25.0051	25.2441
69	24.9526	25.5005	24.9311	25.3142	24.9823	25.1483
70	24.9546	25.3972	25.0111	25.2934	24.9888	25.1669
71	24.886	25.3987	25.0365	25.2397	24.998	25.0648
72	24.8646	25.5693	24.8795	25.2566	24.9795	25.1168
73	24.9497	25.5311	25.0767	25.1733	24.9635	25.0262
74	24.8865	25.565	25.0096	25.2483	25.0061	25.1361
75	24.921	25.4769	25.077	25.2856	25.0192	24.9876
76	24.9277	25.4703	25.0535	25.3126	24.9183	25.0621
77	25.0455	25.4373	25.0849	25.2215	24.9078	25.2041
78	25.0386	25.4364	25.209	25.1983	24.9954	25.1645
79	24.8665	25.365	25.0526	25.159	25.1176	25.2326
80	25.0277	25.4927	25.1934	25.1236	25.0458	25.0407
81	25.0147	25.5217	25.1144	25.2426	25.1499	25.043
82	24.9921	25.4579	25.033	25.2245	25.0045	25.1505
83	24.9023	25.3848	25.1042	25.2054	24.9624	25.1083
84	24.8142	25.4101	25.1564	25.1792	24.9668	25.1137
85	24.8457	25.4843	25.0562	25.1988	24.9132	24.969
86	24.9004	25.3824	24.9318	25.1425	24.9506	25.0624
87	25.0213	25.3415	25.1173	25.2038	24.945	24.9479
88	24.9561	25.5565	24.9259	25.1455	25.0726	24.9048
89	24.7965	25.493	25.0901	25.192	24.896	25.0447
90	24.9562	25.4917	25.0402	25.2631	25.0539	24.9631
91	24.9117	25.5277	25.0695	25.3174	24.9921	25.0398
92	24.9354	25.5929	25.2263	25.1642	25.1023	24.9625
93	25.049	25.4612	25.0709	25.1303	25.1275	24.9555
94	24.9248	25.357	25.0794	25.3194	25.0514	25.0755
95	24.956	25.3981	25.2279	25.2204	25.0264	25.0035
96	24.9373	25.3583	25.1717	25.0817	25.0584	25.0673
97	25.0352	25.5345	25.261	25.085	25.0676	25.0537
98	24.9641	25.4577	25.2579	25.0609	25.1061	25.0621
99	24.8896	25.492	25.3089	25.2087	25.0792	25.1871
100	24.9144	25.3737	25.2517	25.2161	25.1464	24.9295
101	24.8614	25.3374	25.0781	25.1421	25.1394	24.8877
102	24.9635	25.4572	25.0693	25.4513	25.1367	24.9564
103	25.027	25.4138	25.0885	25.3927	25.1862	24.9995
104	25.1786	25.4202	25.0226	25.3254	25.1313	25.0356
105	25.0081	25.4082	25.0785	25.2918	25.0848	25.0543
106	24.8812	25.5793	25.0634	25.2516	25.0551	24.8857
107	24.9894	25.4339	25.1387	25.2251	25.1865	24.9057
108	25.0024	25.3561	25.1219	25.3165	25.2382	24.8366
109	25.0561	25.4638	25.0872	25.2233	25.0965	24.9732
110	24.9276	25.4283	25.1784	25.1054	25.1905	24.9222
111	25.0383	25.6082	25.1231	25.2416	25.1257	24.9961
112	25.1276	25.3869	25.1691	25.3604	25.2282	25.0107
113	24.9581	25.4063	25.123	25.2503	25.1821	24.9625
114	25.0282	25.4966	25.0287	25.0777	25.1291	24.9415
115	24.9693	25.5742	25.1217	25.3052	25.137	24.9957
116	25.1156	25.5325	25.0606	25.2291	25.0609	24.911
117	24.965	25.464	25.1133	25.2264	25.1016	24.867
118	25.1573	25.5236	25.0275	25.4178	25.046	24.9806
119	25.1405	25.4479	25.1109	25.2497	25.1556	24.886
120	25.2203	25.4855	25.0709	25.1866	25.0306	24.9346
121	25.0817	25.4718	25.1956	25.2276	24.9943	24.9625
122	25.0843	25.3878	25.2543	25.0176	25.1106	24.8858
123	24.9467	25.4298	25.2482	25.2293	25.0602	24.9886
124	25.0046	25.2875	25.2032	25.1119	25.0915	25.0544
125	25.0731	25.2771	25.308	24.9851	25.0745	24.9549
126	25.0094	25.4104	25.3551	25.1481	25.1256	25.0409
127	25.0861	25.4949	25.3214	25.2039	25.0623	25.0606
128	25.0684	25.2729	25.3469	25.2387	24.9843	24.9252
129	25.1766	25.5531	25.1463	25.2531	25.1667	24.9801
130	25.0099	25.5049	25.278	25.3435	25.1129	25.0297
131	24.9954	25.5306	25.1	25.0997	25.0283	25.02
132	24.998	25.3981	25.0099	25.3209	25.1067	24.8897
133	25.054	25.5069	25.0436	25.3726	25.1616	24.9274
134	24.8908	25.3726	25.0903	25.3052	25.1826	24.9696
135	24.9727	25.3764	25.0494	25.3274	25.0233	24.964
136	24.9565	25.3564	25.0962	25.3655	25.1059	24.8373
137	24.9575	25.3364	24.984	25.3991	25.0125	25.0035
138	25.0501	25.464	25.1503	25.4349	25.0888	25.0729
139	25.0323	25.4426	25.094	25.3408	25.1179	25.0207
140	25.1548	25.3385	25.027	25.3663	25.0882	24.9907
141	25.2315	25.4449	25.2278	25.463	25.1766	25.1154
142	25.1404	25.4132	25.067	25.225	24.9667	24.9908
143	25.2203	25.5063	25.2442	25.3738	25.1907	24.9716
144	25.1966	25.3673	25.1139	25.4548	25.1454	24.9415
145	25.2374	25.442	25.0773	25.3863	25.1929	25.0927
146	25.134	25.3524	25.2545	25.4462	25.2078	25.0383
147	25.051	25.327	25.0982	25.432	24.9572	25.0679
148	25.0222	25.3482	24.9869	25.3543	25.041	25.0567
149	24.934	25.3226	25.0508	25.4584	24.9974	24.946
150	24.9922	25.4489	25.1171	25.4563	24.977	25.0064
151	25.0179	25.447	25.1051	25.4067	24.9857	24.9779
152	25.0269	25.4381	25.0428	25.4631	25.0703	25.0475
153	24.8658	25.4505	25.025	25.4809	25.0678	24.9826
154	24.9816	25.3972	25.0542	25.5176	25.0756	24.8875
155	24.9518	25.2752	24.8272	25.2793	25.1339	24.9781
156	25.0211	25.3936	24.9403	25.4933	25.0497	25.0488
157	25.1276	25.4579	24.8558	25.4587	25.1587	25.0593
158	24.9498	25.3775	25.0451	25.5231	25.2048	25.0798
159	25.0357	25.3769	24.9349	25.3748	25.0683	25.054
160	25.1612	25.2975	24.9834	25.3087	25.0386	25.135
161	25.0065	25.3612	24.9465	25.428	24.9773	24.9775
162	24.9245	25.3724	25.0038	25.3893	25.188	25.018
163	25.0217	25.4399	24.9436	25.3862	25.1049	24.9993
164	25.0311	25.3367	24.9876	25.321	25.0259	25.011
165	25.0976	25.4262	25.0265	25.4653	25.1108	24.9502
166	25.0077	25.3327	24.9938	25.3671	25.114	24.9362
167	25.0232	25.2663	25.0719	25.3699	25.0636	24.9866
168	25.0977	25.2858	25.0322	25.3154	25.0256	24.8711
169	25.0151	25.3805	24.9075	25.3749	25.1263	24.9177
170	25.0561	25.3357	25.0307	25.3165	25.0505	25.0749
171	24.9414	25.3965	25.0379	25.3157	25.0406	25.0167
172	24.8582	25.4287	24.9513	25.4045	25.0908	24.9378
173	25.0642	25.4589	24.9288	25.4776	25.0023	25.1411
174	24.9537	25.3316	25.0912	25.4333	25.1335	25.0622
175	25.0205	25.3109	24.8955	25.4597	25.2109	25.0182
176	24.9573	25.2262	24.9563	25.3656	25.1545	24.9714
177	24.9256	25.4584	24.9852	25.4638	25.1095	25.0456
178	24.9327	25.2623	24.9425	25.4784	25.1214	25.0609
179	24.8432	25.4217	24.9603	25.5266	25.0589	25.0634
180	24.9313	25.5439	24.8697	25.4096	25.0252	25.1644
181	25.0317	25.3804	25.0148	25.323	24.9227	25.1388
182	24.9804	25.3514	25.0274	25.218	25.1187	25.1707
183	25.0378	25.3947	24.979	25.3631	25.0975	25.037
184	25.2633	25.4034	24.9557	25.5742	25.1606	25.0601
185	25.1074	25.3384	24.9019	25.649	25.2481	25.1107
186	25.1232	25.4324	24.9218	25.5513	25.1605	25.1384
187	24.9956	25.303	24.9642	25.6226	25.1168	25.1775
188	24.9279	25.3883	24.8588	25.3997	25.1282	25.0571
189	25.0415	25.267	25.0041	25.5211	25.1684	25.1227
190	25.1874	25.2863	25.0341	25.5888	25.1754	25.0474
191	25.0865	25.2808	25.1944	25.4619	25.2634	25.1577
192	25.11	25.4609	25.1161	25.5342	25.1602	24.9618
193	25.0897	25.4761	25.1243	25.4878	25.1487	24.9699
194	25.2129	25.2964	25.1501	25.4142	25.2656	24.9684
195	25.0946	25.4118	25.0839	25.5365	25.2216	25.075
196	25.1496	25.3445	25.107	25.392	25.21	25.0851
197	25.1555	25.381	25.2386	25.4649	25.1745	25.0472
198	25.1738	25.2645	25.1893	25.3855	25.2242	25.0123
199	25.2022	25.3185	25.3124	25.5367	25.2839	25.048
200	25.2768	25.4669	25.348	25.4388	25.247	24.9919
201	25.2692	25.307	25.193	25.3977	25.2109	24.9909
202	25.1992	25.3673	25.3098	25.5032	25.3135	24.9556
203	25.1295	25.4387	25.363	25.3368	25.2715	24.8064
204	25.3079	25.3867	25.2793	25.5784	25.2931	25.1778
205	25.2441	25.3956	25.2894	25.5224	25.4105	25.1186
206	25.2411	25.4016	25.3642	25.5568	25.2864	24.907
207	25.2421	25.4264	25.3571	25.5513	25.0681	24.993
208	25.0937	25.3589	25.2387	25.4913	25.2573	25.1077
209	25.1257	25.3085	25.2292	25.4635	25.1791	25.0858
210	25.19	25.3331	25.3036	25.4302	25.0629	25.0172
211	25.2821	25.3747	25.2533	25.4401	25.1357	25.0178
212	25.0489	25.4384	25.1982	25.3619	25.2456	24.8966
213	25.0393	25.248	25.1851	25.2891	25.1727	25.0459
214	25.0215	25.5498	25.2026	25.2276	25.228	24.9779
215	25.1763	25.6013	25.1912	25.3826	25.1629	24.9198
216	25.1261	25.4782	25.0825	25.4143	25.2939	24.9684
217	25.0289	25.4469	25.1744	25.3372	25.3081	25.1322
218	25.1408	25.3455	25.3066	25.3209	25.2027	25.1336
219	24.9576	25.4182	25.0593	25.4457	25.1809	25.182
220	25.0205	25.4111	25.1682	25.4363	25.2635	25.1438
221	25.1367	25.3777	25.2121	25.508	25.3461	25.0247
222	25.0331	25.4252	25.1565	25.5343	25.31	25.1455
223	25.1276	25.3106	25.1732	25.4556	25.408	24.9904
224	25.1527	25.401	25.1268	25.4317	25.42	24.8804
225	25.1117	25.3571	24.9819	25.3971	25.4607	25.0309
226	24.9446	25.398	25.0701	25.2056	25.3703	25.031
227	24.988	25.3644	25.2251	25.1887	25.3757	25.0492
228	25.2262	25.3787	25.2421	25.2311	25.2658	25.0393
229	24.9835	25.3425	25.2139	25.2713	25.3163	25.1476
230	24.9729	25.2914	25.2331	25.2556	25.3228	25.22
231	25.032	25.3533	25.2815	25.2913	25.3425	25.2111
232	24.9633	25.3928	25.365	25.4104	25.3759	25.1451
233	25.0515	25.317	25.1667	25.3688	25.3461	24.89
234	25.1468	25.4274	25.1056	25.3974	25.3013	25.2713
235	25.1328	25.442	25.2076	25.5277	25.2892	25.1412
236	24.9925	25.2545	25.1557	25.677	25.2577	25.1882
237	25.1192	25.3367	25.303	25.6113	25.2233	25.3089
238	25.129	25.3157	25.3753	25.4837	25.3899	25.1591
239	25.1396	25.3347	25.4511	25.4283	25.2843	25.227
240	25.1109	25.3421	25.5198	25.4739	25.3111	25.1988
241	24.9585	25.3651	25.3114	25.5898	25.2031	25.172
242	25.0189	25.298	25.3093	25.598	25.1678	25.0311
243	25.0399	25.4705	25.3351	25.3742	25.2223	25.1471
244	25.0929	25.348	25.2404	25.2981	25.2008	25.2548
245	25.0397	25.371	25.177	25.4088	25.2402	25.1194
246	25.0376	25.33	25.2036	25.5031	25.1096	25.2826
247	24.9195	25.4144	25.0494	25.475	25.1644	25.1663
248	24.9913	25.3959	25.1634	25.4646	25.0847	25.2154
249	25.1889	25.5198	25.2078	25.3985	25.1497	25.1083
250	25.0506	25.4629	25.1687	25.452	25.2143	25.1032
251	24.9987	25.3351	25.2153	25.3917	25.1446	25.1425
252	24.913	25.6309	25.1338	25.3967	25.1039	25.1604
253	25.0923	25.2832	25.1513	25.3022	25.1579	24.9977
254	25.0063	25.4564	25.2581	25.328	25.1327	24.9055
255	25.1222	25.3251	25.2117	25.5148	25.2227	25.1027
256	25.0801	25.4259	25.3154	25.4684	25.1616	25.0435
257	24.9968	25.4864	25.297	25.437	25.033	25.1275
258	25.0689	25.4959	25.3199	25.4387	25.0314	24.9982
259	25.0734	25.4514	25.2563	25.5716	25.1378	25.1362
260	25.1085	25.4503	25.3048	25.5545	24.977	24.9462
261	25.0823	25.4573	25.2117	25.5996	25.0134	25.0524
262	24.986	25.5521	25.1548	25.6065	25.0099	25.1527
263	24.9247	25.4954	25.2362	25.4689	25.0294	25.121
264	25.0467	25.4739	25.2225	25.4168	24.944	25.074
265	24.9826	25.4674	25.258	25.4868	24.9347	25.0905
266	24.9864	25.5772	25.2127	25.5889	25.0047	25.1789
267	24.9694	25.4585	25.268	25.5201	24.9613	25.1527
268	24.9603	25.5512	25.1746	25.4661	25.071	25.2964
269	24.7933	25.4608	25.3396	25.4219	25.0039	25.1974
270	24.8674	25.4492	25.379	25.4367	25.0266	25.0595
271	24.8116	25.4066	25.4968	25.4745	25.1941	25.1192
272	24.8854	25.4202	25.4381	25.325	25.0704	25.2057
273	24.9409	25.3599	25.3458	25.5187	25.1251	25.1635
274	24.9081	25.4413	25.2569	25.3688	25.0893	25.0719
275	25.1134	25.3508	25.2895	25.4688	25.0196	25.0782
276	25.1203	25.4254	25.2251	25.5335	25.1152	25.0354
277	24.9837	25.3672	25.2533	25.4069	25.2216	25.2058
278	24.9093	25.4266	25.3625	25.4241	25.1104	25.1432
279	25.1714	25.4283	25.2871	25.5404	25.0999	25.1874
280	25.1311	25.4294	25.3439	25.4094	25.0907	25.101
281	24.9091	25.4561	25.3217	25.341	25.1527	25.2086
282	25.045	25.6997	25.3908	25.2635	25.137	25.0941
283	25.0233	25.5708	25.3932	25.376	25.1187	25.1982
284	25.0871	25.5057	25.3928	25.4419	24.9975	25.2102
285	25.0975	25.4638	25.3442	25.3942	25.1047	25.0818
286	25.1584	25.4781	25.2212	25.3404	25.1436	25.1536
287	25.1035	25.4999	25.3964	25.4834	25.0513	24.9336
288	24.9991	25.6079	25.2482	25.4737	25.1751	25.1463
289	25.1452	25.6423	25.2371	25.5959	25.1374	25.0534
290	25.121	25.4207	25.2387	25.4293	25.16	25.2322
291	25.1473	25.6044	25.2726	25.5276	25.0557	25.2137
292	25.2415	25.5817	25.2916	25.5609	24.9955	25.3074
293	25.2208	25.5169	25.1662	25.6126	25.1102	25.094
294	25.1236	25.5405	25.1847	25.471	25.0848	25.0613
295	25.275	25.5173	25.2978	25.6218	25.132	24.9413
296	25.1506	25.513	25.2799	25.6307	25.0866	25.0524
297	25.1464	25.4999	25.2648	25.5315	25.0475	25.1526
298	25.2078	25.571	25.4262	25.6021	25.1198	25.1359
299	25.1244	25.5614	25.3923	25.511	25.1614	25.2115
300	25.2115	25.4007	25.3214	25.5912	25.1424	25.2513
301	25.1853	25.4437	25.2247	25.4755	25.1158	24.9909
302	25.1511	25.4234	25.2278	25.5182	25.0687	25.0943
303	25.18	25.4701	25.2157	25.4904	25.1714	25.074
304	25.2606	25.4362	25.2526	25.314	25.2785	24.9949
305	25.1862	25.3982	25.2832	25.4993	25.1207	25.089
306	25.1882	25.6101	25.2735	25.4496	25.1148	25.1832
307	25.211	25.5315	25.4268	25.5091	25.0721	25.0132
308	25.1228	25.5383	25.2673	25.5883	25.0199	25.1391
309	25.3415	25.4165	25.2527	25.4142	25.1301	25.0549
310	25.1961	25.5582	25.3432	25.3137	25.1	25.0844
311	25.2176	25.634	25.2045	25.2716	24.9894	25.039
312	25.1662	25.6843	25.2247	25.3709	25.0894	25.0918
313	25.1353	25.4057	25.3083	25.3525	25.1769	25.1354
314	25.2552	25.51	25.3245	25.4332	25.2251	25.2458
315	25.098	25.536	25.4035	25.3135	25.1768	25.1408
316	25.2608	25.4379	25.2661	25.4285	25.2442	25.2063
317	25.1385	25.4863	25.3721	25.4271	25.2939	25.0454
318	25.2003	25.5076	25.327	25.5111	25.2548	25.1121
319	25.2524	25.47	25.3084	25.6204	25.2002	25.2221
320	25.205	25.4995	25.2991	25.4328	25.3347	25.1242
321	25.1721	25.6074	25.2471	25.3473	25.3699	25.1848
322	25.2629	25.4547	25.1821	25.3498	25.2561	25.2148
323	25.1535	25.4918	25.255	25.3441	25.2074	25.0763
324	25.2223	25.5384	25.1992	25.3578	25.1332	25.0865
325	25.1594	25.5212	25.339	25.3778	25.2043	25.165
326	25.0173	25.4067	25.2738	25.4273	25.1764	25.2716
327	25.1591	25.3286	25.2907	25.4233	25.2939	25.1623
328	25.1702	25.5484	25.3782	25.4228	25.1674	25.1582
329	25.3235	25.4232	25.2266	25.3597	25.1998	25.1738
330	25.4229	25.4383	25.2295	25.3939	25.1508	24.9275
331	25.3426	25.3366	25.057	25.3543	25.1872	25.0231
332	25.2827	25.3974	25.2771	25.3437	25.3235	25.0275
333	25.2026	25.474	25.2932	25.3561	25.2753	24.9646
334	25.2251	25.442	25.367	25.5173	25.0735	25.1201
335	25.0497	25.621	25.3066	25.4556	25.1426	24.9669
336	25.2661	25.373	25.393	25.4171	24.9989	25.0142
337	25.2981	25.6445	25.329	25.5684	25.1447	25.2414
338	25.2682	25.5801	25.2081	25.6472	25.0558	25.0892
339	25.3068	25.5946	25.2205	25.4407	25.0969	25.0106
340	25.2815	25.4899	25.3264	25.5107	25.12	25.0389
341	25.1804	25.6006	25.3466	25.4031	25.0374	25.062
342	25.0207	25.4002	25.2674	25.3236	25.0957	24.9591
343	25.0845	25.6683	25.305	25.5724	25.142	25.078
344	25.123	25.4493	25.1169	25.3862	25.0755	25.0097
345	25.0662	25.5217	25.2226	25.404	25.0973	24.9794
346	25.2116	25.4325	25.2034	25.4052	25.0875	24.8998
347	25.1318	25.6246	25.1809	25.3363	25.0549	24.8517
348	25.0816	25.489	25.2047	25.5224	25.1279	24.9728
349	25.1397	25.73	25.3211	25.4303	25.018	25.0751
350	25.1937	25.4796	25.1919	25.4985	25.1151	24.984
351	25.1231	25.4849	25.2926	25.4416	25.1151	24.98
352	25.1559	25.4778	25.1925	25.3943	25.0498	24.9855
353	25.1771	25.5104	25.1187	25.4422	25.0635	24.9533
354	25.1524	25.3325	25.1814	25.5191	25.0566	25.0479
355	25.2876	25.4895	25.1864	25.4132	25.0769	25.1075
356	25.2139	25.4604	25.3089	25.3193	25.1052	24.9926
357	25.231	25.4231	25.2138	25.466	25.1296	25.0621
358	25.3524	25.3159	25.1916	25.3628	25.2929	25.0121
359	25.2429	25.3686	25.2113	25.4077	25.152	24.9897
360	25.3473	25.3459	25.1872	25.4026	25.1214	25.0757
361	25.4187	25.3794	25.1648	25.3775	25.02	25.0642
362	25.5056	25.5725	25.436	25.5081	25.1207	25.1362
363	25.5269	25.58	25.2127	25.4714	25.0502	25.0791
364	25.438	25.5294	25.3223	25.5396	25.1591	25.0141
365	25.4397	25.4057	25.2622	25.4547	25.0999	25.0283
366	25.4028	25.4308	25.2264	25.2841	25.1862	24.94
367	25.3789	25.2994	25.1976	25.3329	25.1132	24.9431
368	25.3858	25.2909	25.2552	25.2742	25.0992	24.9352
369	25.3068	25.4818	25.2318	25.4116	25.0116	24.9773
370	25.3106	25.3676	25.372	25.4487	25.0703	25.1104
371	25.2484	25.457	25.2786	25.3801	25.1041	25.1633
372	25.1515	25.28	25.2133	25.5209	25.0601	25.1195
373	25.2675	25.3364	25.2682	25.4574	25.071	25.0827
374	25.3794	25.3364	25.3246	25.6363	25.0895	25.0339
375	25.3125	25.5086	25.4195	25.5027	25.1239	25.1308
376	25.3292	25.4115	25.2048	25.3801	25.0126	24.9579
377	25.3778	25.4788	25.3033	25.5385	24.9948	24.9614
378	25.2788	25.5069	25.3136	25.3803	25.0249	24.9278
379	25.3274	25.477	25.4073	25.4083	24.9821	25.0307
380	25.3505	25.592	25.2605	25.4752	25.1285	25.0342
381	25.3622	25.6981	25.2622	25.4103	25.1233	25.0672
382	25.3046	25.4637	25.2458	25.4423	25.0802	25.0798
383	25.3196	25.5295	25.1487	25.413	25.1236	25.0346
384	25.2217	25.4329	25.2262	25.513	25.0917	25.1005
385	25.2426	25.4781	25.3264	25.4858	25.1001	24.9344
386	25.2504	25.4632	25.3241	25.3258	25.1055	24.8805
387	25.2229	25.4803	25.3801	25.3649	25.1352	24.9947
388	25.1283	25.5013	25.4	25.3143	25.1621	25.0966
389	25.2839	25.5754	25.2218	25.4975	25.112	24.9551
390	25.2093	25.7418	25.289	25.4545	25.1505	25.1075
391	25.2591	25.5436	25.3612	25.4903	25.0058	24.9673
392	25.1581	25.5125	25.4063	25.4724	25.2719	25.0703
393	25.1453	25.4693	25.3283	25.5105	25.3234	25.0676
394	25.176	25.531	25.183	25.6975	25.1846	25.0507
395	25.1442	25.4603	25.2626	25.5175	25.0008	24.9695
396	25.124	25.4901	25.2936	25.7167	25.0847	25.0736
397	25.2332	25.5026	25.2486	25.7522	25.1095	25.1278
398	25.2001	25.4097	25.2394	25.5034	25.0608	25.1047
399	25.1978	25.3397	25.2195	25.7	25.0118	24.9982
400	25.1004	25.4786	25.2253	25.5855	25.151	24.9148
401	25.3193	25.5598	25.2248	25.5044	25.2244	24.7972
402	25.2441	25.5587	25.1566	25.6769	25.1747	25.1159
403	25.2697	25.5734	25.3565	25.5953	25.1205	25.1137
404	25.2274	25.5363	25.257	25.5787	25.2564	24.9963
405	25.1746	25.6448	25.2633	25.4783	25.1277	25.0044
406	25.343	25.5226	25.3696	25.4322	25.1151	24.9425
407	25.2714	25.4542	25.4328	25.4566	25.135	24.9802
408	25.2827	25.4822	25.2159	25.5411	25.161	25.0352
409	25.2016	25.4971	25.3727	25.4283	25.0556	25.0667
410	25.3893	25.4841	25.3822	25.344	25.2371	24.9817
411	25.2363	25.3854	25.3086	25.4768	25.2409	25.0529
412	25.2074	25.5043	25.4238	25.4205	25.2613	24.9302
413	25.3056	25.6386	25.3717	25.4242	25.0472	24.8932
414	25.2336	25.5433	25.2271	25.4341	25.0361	25.0005
415	25.3056	25.5652	25.2495	25.2432	25.1479	25.0963
416	25.2401	25.3949	25.2123	25.4198	25.0581	25.1543
417	25.2228	25.4481	25.142	25.3863	25.1134	25.0408
418	25.3528	25.4651	25.0639	25.4317	25.2919	24.9913
419	25.2481	25.5061	25.1284	25.4061	25.1234	24.9312
420	25.3615	25.5306	25.1764	25.2788	25.1255	24.972
421	25.2375	25.3714	25.2111	25.3111	25.2135	25.0938
422	25.1444	25.5267	25.469	25.2462	25.0986	25.0147
423	25.2186	25.4504	25.4137	25.3884	25.1252	25.061
424	25.2831	25.3201	25.3411	25.3303	24.9949	24.9528
425	25.2898	25.2881	25.336	25.3675	25.1508	25.1582
426	25.2402	25.4037	25.3635	25.2469	25.1625	25.005
427	25.0471	25.4318	25.5077	25.2606	25.1103	24.9207
428	25.1456	25.3955	25.5059	25.3745	25.0249	25.05
429	25.206	25.4488	25.4528	25.4433	25.1118	24.9454
430	25.2401	25.3336	25.4378	25.3905	25.015	25.0381
431	25.1327	25.5066	25.3908	25.4641	25.0517	25.0567
432	25.2471	25.4534	25.3351	25.5398	25.0097	24.982
433	25.3829	25.5211	25.3687	25.289	25.0812	24.9733
434	25.2548	25.5252	25.2662	25.1091	24.9802	25.0149
435	25.3849	25.6375	25.252	25.4875	25.118	24.7584
436	25.3983	25.5312	25.3728	25.3007	25.1425	24.8796
437	25.4285	25.6898	25.3583	25.3054	25.1055	24.9241
438	25.4326	25.5175	25.3134	25.3405	25.0874	24.9891
439	25.258	25.4161	25.257	25.2085	25.2121	24.8203
440	25.2809	25.5744	25.3717	25.2751	25.0259	24.9069
441	25.4958	25.3179	25.3261	25.3173	25.1152	24.9622
442	25.321	25.3731	25.3483	25.2528	25.1519	24.8741
443	25.2483	25.4743	25.2249	25.3846	25.1235	24.8585
444	25.2053	25.4213	25.2431	25.2262	25.1065	24.8701
445	25.2383	25.4855	25.2064	25.32	25.2158	24.9034
446	25.2942	25.4935	25.2434	25.1461	25.2344	24.815
447	25.1944	25.2586	25.2435	25.187	25.1366	24.9027
448	25.3752	25.3801	25.2199	25.2287	25.0413	24.8935
449	25.3017	25.6015	25.3204	25.1739	25.1076	24.8658
450	25.1004	25.4786	25.2253	25.5855	25.151	24.9148
451	25.3193	25.5598	25.2248	25.5044	25.2244	24.7972
452	25.2441	25.5587	25.1566	25.6769	25.1747	25.1159
453	25.2697	25.5734	25.3565	25.5953	25.1205	25.1137
454	25.2274	25.5363	25.257	25.5787	25.2564	24.9963
455	25.1746	25.6448	25.2633	25.4783	25.1277	25.0044
456	25.343	25.5226	25.3696	25.4322	25.1151	24.9425
457	25.2714	25.4542	25.4328	25.4566	25.135	24.9802
458	25.2827	25.4822	25.2159	25.5411	25.161	25.0352
459	25.2016	25.4971	25.3727	25.4283	25.0556	25.0667
460	25.3893	25.4841	25.3822	25.344	25.2371	24.9817
461	25.2363	25.3854	25.3086	25.4768	25.2409	25.0529
462	25.2074	25.5043	25.4238	25.4205	25.2613	24.9302
463	25.3056	25.6386	25.3717	25.4242	25.0472	24.8932
464	25.2336	25.5433	25.2271	25.4341	25.0361	25.0005
465	25.3056	25.5652	25.2495	25.2432	25.1479	25.0963
466	25.2401	25.3949	25.2123	25.4198	25.0581	25.1543
467	25.2228	25.4481	25.142	25.3863	25.1134	25.0408
468	25.3528	25.4651	25.0639	25.4317	25.2919	24.9913
469	25.2481	25.5061	25.1284	25.4061	25.1234	24.9312
470	25.3615	25.5306	25.1764	25.2788	25.1255	24.972
471	25.2375	25.3714	25.2111	25.3111	25.2135	25.0938
472	25.1444	25.5267	25.469	25.2462	25.0986	25.0147
473	25.2186	25.4504	25.4137	25.3884	25.1252	25.061
474	25.2831	25.3201	25.3411	25.3303	24.9949	24.9528
475	25.2898	25.2881	25.336	25.3675	25.1508	25.1582
476	25.2402	25.4037	25.3635	25.2469	25.1625	25.005
477	25.0471	25.4318	25.5077	25.2606	25.1103	24.9207
478	25.1456	25.3955	25.5059	25.3745	25.0249	25.05
479	25.206	25.4488	25.4528	25.4433	25.1118	24.9454
480	25.2401	25.3336	25.4378	25.3905	25.015	25.0381
481	25.1327	25.5066	25.3908	25.4641	25.0517	25.0567
482	25.2471	25.4534	25.3351	25.5398	25.0097	24.982
483	25.3829	25.5211	25.3687	25.289	25.0812	24.9733
484	25.2548	25.5252	25.2662	25.1091	24.9802	25.0149
485	25.3849	25.6375	25.252	25.4875	25.118	24.7584
486	25.3983	25.5312	25.3728	25.3007	25.1425	24.8796
487	25.4285	25.6898	25.3583	25.3054	25.1055	24.9241
488	25.4326	25.5175	25.3134	25.3405	25.0874	24.9891
489	25.258	25.4161	25.257	25.2085	25.2121	24.8203
490	25.2809	25.5744	25.3717	25.2751	25.0259	24.9069
491	25.4958	25.3179	25.3261	25.3173	25.1152	24.9622
492	25.321	25.3731	25.3483	25.2528	25.1519	24.8741
493	25.2483	25.4743	25.2249	25.3846	25.1235	24.8585
494	25.2053	25.4213	25.2431	25.2262	25.1065	24.8701
495	25.2383	25.4855	25.2064	25.32	25.2158	24.9034
496	25.2942	25.4935	25.2434	25.1461	25.2344	24.815
497	25.1944	25.2586	25.2435	25.187	25.1366	24.9027
498	25.3752	25.3801	25.2199	25.2287	25.0413	24.8935
499	25.3017	25.6015	25.3204	25.1739	25.1076	24.8658
Average RG	25.1086	25.4151	25.1801	25.3531	25.1055	25.0304

## Sheet: Thymidine Kinase
	CHEMBL3674540	CHEMBL1683320	CHEMBL391279	ZINC000031750813	CHEMBL4078273	Thymidine kinase
0	18.0587	18.1884	18.0803	18.0098	18.1151	18.0613
1	17.8795	18.2638	18.0699	17.9996	18.1677	18.2341
2	17.837	18.2374	18.1405	18.0914	18.1368	18.1269
3	17.8364	18.2916	18.0077	18.169	18.1063	17.9931
4	17.975	18.2736	17.9646	18.1124	17.8658	17.9482
5	18.0848	18.2835	17.9567	18.2568	17.9875	17.7979
6	18.0618	18.3773	17.9864	18.1749	17.9493	17.8725
7	18.049	18.2753	18.0528	18.145	18.0567	17.9333
8	17.9475	18.3151	18.048	18.2987	17.9215	17.9893
9	17.881	18.2499	18.1622	18.1259	17.9304	18.0172
10	17.8216	18.3343	18.1048	18.1817	17.9841	18.0216
11	17.8284	18.1651	17.9518	18.1369	18.0211	18.0483
12	17.9204	18.2367	17.9172	18.1928	18.0675	18.013
13	17.9628	18.1329	17.9536	18.2488	18.2244	18.085
14	18.0244	18.1808	18.0063	18.4467	18.0443	18.0743
15	18.0654	18.0532	17.8019	18.3569	18.1845	18.0897
16	17.9479	18.1512	17.9868	18.2715	18.0935	18.0051
17	18.0312	18.1218	17.8536	18.4233	18.2635	18.1263
18	18.0133	18.1713	17.7758	18.4704	18.2177	17.9767
19	17.9874	18.1774	17.9073	18.3283	18.287	18.2082
20	17.8373	17.946	18.1004	18.3797	18.0868	18.1551
21	17.9461	17.9529	18.1593	18.4489	18.177	17.9709
22	17.9476	18.1158	17.9845	18.4943	18.1173	18.05
23	17.8701	18.0226	18.0248	18.3917	18.0907	18.0033
24	17.8388	18.0314	17.9838	18.5571	18.0303	17.8942
25	17.8701	18.096	17.8544	18.5864	18.2238	17.922
26	17.82	18.0598	18.0506	18.3933	18.272	17.9682
27	17.8524	17.992	18.0141	18.4447	18.1731	17.9169
28	17.9982	17.9864	17.948	18.4281	18.1407	18.1235
29	17.8906	17.9412	17.9017	18.4485	18.0808	18.0047
30	17.9598	17.9013	17.8545	18.4067	18.1018	18.1
31	17.9504	17.8757	17.9387	18.3181	18.0885	17.9586
32	17.8944	17.8477	17.9746	18.4592	18.1074	18.0812
33	18.0164	17.8551	18.1076	18.3946	18.0896	18.0488
34	17.9267	17.7974	18.0633	18.2067	18.0713	18.0297
35	17.8397	17.7939	18.0154	18.2646	18.0481	18.1016
36	17.9096	17.9134	17.9835	18.2906	18.1113	18.0761
37	17.812	17.8031	17.9372	18.3796	18.0621	18.0313
38	17.7258	17.9469	17.9118	18.2654	18.112	18.0082
39	17.812	17.8472	17.9424	18.2157	18.1483	18.0102
40	17.8269	17.8117	18.0419	18.3605	18.1197	18.0122
41	17.6793	17.883	18.0569	18.3728	18.0079	17.923
42	17.7026	18.0267	18.0508	18.3723	18.1513	17.983
43	17.6692	17.996	18.1266	18.5086	18.1003	17.8603
44	17.8729	17.8895	17.9323	18.5799	18.1617	17.8805
45	17.8365	17.9835	17.9926	18.6584	18.1385	17.9577
46	17.7603	18.0884	18.1429	18.5513	18.1073	17.9476
47	17.6797	18.0323	18.0132	18.3892	18.165	18.0266
48	17.6759	18.0156	18.0503	18.5647	18.1701	17.8784
49	17.7412	18.1	18.0036	18.7634	18.161	17.8461
50	17.6789	17.8994	18.0276	18.598	18.1109	17.8845
51	17.6647	18.0568	18.0142	18.7122	18.1274	17.8712
52	17.6197	17.9682	17.9029	18.7834	18.1033	17.8821
53	17.5926	17.9703	18.0283	18.6631	18.1256	17.8555
54	17.7028	17.9838	18.0359	18.7633	18.1366	17.926
55	17.6664	18.0362	18.0577	18.5093	18.185	17.8697
56	17.7446	17.9743	17.9656	18.7717	18.0916	17.8939
57	17.6941	18.0289	17.9456	18.8892	18.0385	17.828
58	17.8553	17.978	17.9372	18.8981	18.0393	17.795
59	17.7566	17.879	17.9997	19.0558	17.9553	17.8544
60	17.7278	17.911	17.8677	18.9395	17.9071	17.785
61	17.7313	17.9339	17.9961	19.0781	18.0093	17.8272
62	17.6671	17.9939	17.9375	18.6275	17.9967	17.7692
63	17.7082	17.9139	17.9243	18.6714	17.9849	17.8398
64	17.7521	17.9101	17.8229	18.5522	17.9808	17.8814
65	17.8483	17.9063	17.8172	18.4022	17.8908	17.7992
66	17.8364	17.9155	17.9461	18.2954	17.9269	17.845
67	17.7638	17.9554	17.9265	18.2195	17.9372	17.7547
68	17.7658	18.062	17.9384	18.3344	17.8539	17.8937
69	17.6552	18.0218	17.8653	18.3734	18.062	17.9196
70	17.8205	18.0418	17.8341	18.5072	18.0453	18.0265
71	17.8386	18.1692	17.9795	18.5586	18.0096	17.9473
72	17.7577	18.1154	17.8722	18.9401	17.9927	17.9567
73	17.7409	18.1149	18.0406	18.7609	18.0656	17.9065
74	17.756	18.0175	17.9633	18.5466	17.9765	17.9493
75	17.7255	18.2149	17.8153	18.4804	17.875	17.8729
76	17.6919	17.9856	18.0134	18.5116	17.9339	17.8723
77	17.6604	18.0296	17.8593	18.7993	17.9788	17.886
78	17.7806	18.2235	17.9573	18.5566	17.8916	17.8812
79	17.6949	18.1254	17.9102	18.8029	18.0491	17.948
80	17.7294	18.0146	17.8041	18.6574	17.9197	17.9568
81	17.7406	18.1133	17.9037	19.0588	17.9283	17.9009
82	17.8242	17.9256	17.9817	18.9279	17.9731	17.9528
83	17.6494	18.068	17.9086	18.7313	17.9194	17.9495
84	17.7241	17.9845	17.8383	18.7254	17.8311	18.0029
85	17.6593	17.927	18.0478	18.8801	17.8546	17.9846
86	17.7968	17.9633	18.1507	18.8424	17.8711	18.0328
87	17.7781	17.7442	17.9962	18.8039	17.866	18.0565
88	17.6383	17.9285	18.0402	18.827	17.8459	18.0776
89	17.7943	17.8582	17.9914	18.8296	17.8596	18.0031
90	17.7651	17.9719	17.979	19.1599	17.8733	18.0335
91	17.6909	17.8455	18.1606	18.9046	17.782	17.9279
92	17.584	17.8035	18.0002	18.6247	17.8682	18.0338
93	17.8083	17.8438	18.0158	18.518	17.9131	18.0618
94	17.8451	17.8376	18.0336	18.5491	17.889	18.1198
95	17.9484	17.7913	17.9997	18.5415	17.8242	18.0211
96	17.887	17.9077	18.0514	18.6924	17.7783	18.1332
97	17.8162	17.8575	18.1187	18.71	17.8289	18.0183
98	17.8072	17.8363	18.0943	18.8454	17.9302	18.0274
99	17.7404	17.8326	17.96	18.957	18.0187	18.1201
100	17.8005	17.7781	17.9931	19.1083	17.9688	17.9986
101	17.7982	17.8189	18.0762	18.8909	17.9717	17.9771
102	17.7454	17.8411	18.0654	19.1612	18.1079	17.953
103	17.9084	17.7864	18.143	19.1302	18.1354	17.9067
104	17.9088	17.7948	18.2509	19.2611	18.122	18.0421
105	17.8168	17.831	18.1536	19.0212	18.067	17.8933
106	17.8598	17.7853	18.023	18.9586	18.0009	17.8357
107	17.8922	17.7569	18.2648	18.7767	18.0611	17.9607
108	17.8536	17.7562	18.3338	18.7592	18.0169	18.0192
109	17.809	17.7713	18.3637	19.003	18.0852	18.0259
110	17.7762	17.8077	18.277	19.1929	18.1152	18.0218
111	17.806	17.7489	18.1516	19.3491	18.1696	18.0262
112	17.8506	17.7745	18.1466	19.0938	18.0642	17.9691
113	17.8074	17.8306	18.1238	19.1639	18.057	18.0385
114	17.8719	17.8231	18.2152	19.0726	18.1128	18.082
115	17.7878	17.7642	18.2066	19.2486	18.135	18.0771
116	17.7712	17.8767	18.1614	19.1891	18.0099	18.0126
117	17.8743	17.8032	18.2832	19.0145	17.979	18.0771
118	17.8306	17.8964	18.2635	18.939	17.9574	18.0006
119	17.8354	17.8247	18.1369	18.945	17.9182	17.9135
120	17.9031	17.7299	18.2285	19.1682	17.943	18.0961
121	17.7987	17.7315	18.2326	19.405	18.0798	18.0188
122	17.8079	17.7794	18.0438	19.5323	18.016	18.0148
123	17.8201	17.8415	18.1266	19.549	17.9485	17.9178
124	17.8553	17.8871	18.1542	19.8292	18.0022	17.9221
125	17.802	17.8897	18.089	19.6755	17.8653	18.1016
126	17.8544	17.931	18.0066	19.5832	17.8945	18.1825
127	17.8239	17.8368	18.186	19.4795	17.9785	18.036
128	17.8129	17.7898	18.2183	19.3968	17.8347	18.0565
129	17.809	17.8539	18.1482	19.5069	17.8831	18.0495
130	17.7458	17.7995	18.2114	19.8249	17.8759	18.0561
131	17.8215	17.8173	18.1448	19.6159	17.938	18.0964
132	17.7605	17.9214	18.1269	19.3575	17.8737	17.9711
133	17.7605	17.8765	18.2137	19.8151	17.8764	18.0668
134	17.7489	17.927	18.1128	20.0526	17.8913	17.9751
135	17.7772	17.8698	18.0252	19.9867	17.9425	18.0164
136	17.8228	17.7729	18.2744	19.4943	17.9676	18.1119
137	17.7583	17.6517	18.2866	19.5811	17.8782	17.939
138	17.8537	17.7783	18.1868	19.7429	17.9574	17.8314
139	17.8046	17.7478	18.0678	19.6516	17.8688	17.835
140	17.7986	17.7839	18.0508	19.6472	17.9012	17.6694
141	17.8266	17.6945	17.964	19.5693	18.0189	17.7859
142	17.7102	17.6407	18.1196	19.5563	17.9759	17.8821
143	17.6486	17.6844	17.9538	19.5175	17.8557	17.8314
144	17.7961	17.6749	18.0378	19.6092	17.9055	17.8525
145	17.8085	17.6735	18.0145	19.4884	18.001	17.8208
146	17.78	17.6629	17.9814	19.8054	18.0548	17.6867
147	17.7831	17.5967	17.9208	19.9679	17.9411	17.7877
148	17.8335	17.7595	17.9893	20.1217	17.8902	17.7367
149	17.7949	17.6293	18.0155	20.1852	17.8609	17.6413
150	17.8782	17.6406	17.9919	20.4536	17.9904	17.9128
151	17.8252	17.7025	18.0071	20.5039	18.0176	17.6928
152	17.7	17.7152	18.0744	20.2334	18.1234	17.7953
153	17.8428	17.7092	18.0132	20.2714	18.0424	17.8
154	17.8051	17.7433	18.0199	20.1292	17.9752	17.822
155	17.835	17.7879	18.0292	20.3086	17.9784	17.9107
156	17.8912	17.6264	17.9637	20.4953	17.9537	17.9185
157	17.9395	17.6209	18.1006	20.7443	17.8783	17.7841
158	17.7391	17.6758	18.1082	20.4702	17.885	17.8477
159	17.8521	17.6119	18.0848	20.6667	17.8744	17.766
160	17.7996	17.6348	18.1545	20.1714	17.8956	17.8945
161	17.7832	17.6525	18.1562	20.1314	18.0934	17.974
162	17.7868	17.7677	18.1924	20.0526	17.9739	17.9543
163	17.9262	17.7405	18.1126	19.8053	17.9931	17.9499
164	17.9392	17.7942	18.1141	19.8352	18.0031	17.8246
165	17.9428	17.6289	18.0385	19.842	18.2263	17.875
166	17.8972	17.7099	18.0977	19.9293	18.0222	18.0043
167	17.918	17.6839	18.0748	19.8416	18.1387	17.8351
168	17.8621	17.6336	18.0548	19.7423	18.0496	17.8261
169	18.0418	17.589	18.0597	19.7588	18.0197	17.8561
170	17.9834	17.6334	18.2186	20.1096	17.9874	17.7657
171	18.0122	17.8094	18.011	19.7149	18.04	17.9195
172	18.0203	17.7424	18.1895	20.0498	18.0202	17.8749
173	17.9508	17.6711	18.1252	19.8899	18.034	18.0168
174	17.9313	17.7282	18.1316	20.4022	18.0157	17.996
175	17.8997	17.7103	18.1112	20.25	18.0994	18.0647
176	17.8273	17.8529	18.1422	20.5002	17.9536	18.0223
177	17.87	17.9058	18.2215	20.262	18.0448	17.9927
178	17.9326	17.8408	18.0848	20.3491	18.0967	18.1484
179	17.8654	17.7179	18.1497	20.2334	18.1402	18.0891
180	17.9207	17.7397	18.1022	20.4978	18.0419	17.9857
181	17.9507	17.7448	18.1601	20.7528	17.9707	18.0318
182	17.9744	17.747	18.0196	20.624	18.0054	18.1144
183	17.907	17.6827	18.1562	20.4619	18.1602	18.1034
184	17.8609	17.8251	18.1559	20.3278	18.0022	18.0917
185	17.8403	17.7803	18.0713	20.4599	17.9768	18.1049
186	17.8685	17.8483	17.9677	20.3483	18.0389	18.1756
187	17.8383	17.7355	18.2287	20.4421	18.0132	18.2202
188	17.7579	17.6969	18.1392	20.7944	17.9698	18.0486
189	17.8805	17.6286	18.1987	20.7929	17.8925	18.1928
190	17.9455	17.6745	18.1379	20.5961	17.8522	18.0956
191	17.9601	17.639	18.1888	20.762	17.9323	18.0892
192	17.8913	17.7335	18.1088	20.6785	17.9675	18.1744
193	17.8773	17.6921	18.0877	20.5648	17.812	18.1072
194	17.9694	17.8296	18.1632	20.7377	17.8993	18.0492
195	17.9173	17.6855	18.0667	20.584	18.0124	18.0181
196	17.9457	17.7176	18.1394	20.6716	17.9308	18.0064
197	17.8435	17.6993	18.0649	20.5393	17.7956	18.0549
198	17.8714	17.6151	18.0828	20.8094	17.9967	17.9754
199	17.765	17.7243	18.1337	21.0128	17.9017	18.0863
200	17.7802	17.7651	18.2436	21.0292	17.8934	17.9805
201	17.9087	17.7704	18.1433	20.7829	17.954	17.9759
202	17.8131	17.78	18.1034	20.8724	17.9207	17.9248
203	17.8693	17.7598	18.0745	20.7422	17.8763	17.9761
204	17.938	17.75	18.1788	20.5318	17.9987	17.9872
205	17.9627	17.6292	18.0556	20.7865	17.924	18.0253
206	17.8256	17.6308	17.99	21.0277	17.9119	18.0923
207	17.883	17.5895	18.0333	21.009	17.8908	18.0309
208	17.8336	17.7009	17.9108	21.0677	17.8555	18.0345
209	17.9253	17.6659	17.9804	20.6654	17.8605	18.1395
210	17.8455	17.7602	18.1702	20.9239	18.1235	18.1117
211	17.7842	17.5708	17.9629	21.026	17.9961	18.0651
212	17.9064	17.7989	18.1102	20.9835	18.0171	17.997
213	17.9742	17.7571	18.0862	21.0178	17.9723	18.0495
214	17.7906	17.5505	17.9519	21.0336	18.0471	18.0824
215	17.9195	17.687	18.0748	20.7237	18.0548	18.0867
216	17.8743	17.6413	18.0442	20.7379	18.0872	18.0172
217	17.8813	17.7499	18.1233	20.3467	17.9776	18.0498
218	17.8258	17.6699	18.1046	20.8271	17.8692	17.9556
219	17.831	17.7387	18.0686	20.9068	17.975	17.8963
220	17.9899	17.8811	18.1775	20.4914	17.874	17.9211
221	17.7847	17.8127	18.0554	21.1058	17.9678	17.9715
222	17.8038	17.8102	18.1605	21.1011	17.8703	17.9221
223	17.8308	17.8035	18.1092	21.1792	17.9364	17.7934
224	17.8529	17.7594	18.1134	21.0459	18.0246	17.9391
225	17.9092	17.8534	18.1781	20.7257	17.7842	17.8946
226	17.7907	17.7836	18.2315	20.6402	17.9736	17.958
227	17.8867	17.7419	18.2245	20.8174	17.9822	17.8156
228	17.8724	17.7635	18.0806	20.876	18.082	17.7048
229	17.8345	17.7179	18.0651	21.0574	17.9297	17.7294
230	17.8401	17.6883	18.101	21.2329	17.8295	17.9356
231	17.9199	17.7652	18.1658	21.0184	17.9482	17.799
232	17.8452	17.8653	18.1653	21.2507	17.8626	17.7844
233	17.8699	17.7516	18.249	21.4145	17.789	17.7502
234	17.8525	17.8632	18.2351	21.2292	17.895	17.9221
235	17.7948	17.7752	18.1902	21.0442	17.9405	17.973
236	17.9723	17.8882	18.1544	21.4023	18.007	17.9429
237	17.9059	17.8636	18.1923	21.3504	18.1007	18.1094
238	17.9326	17.7774	18.1353	21.1982	18.1309	18.1707
239	17.9023	17.7302	18.0107	21.1431	18.0947	18.0571
240	17.9931	17.6773	18.1391	20.938	17.961	18.1215
241	17.8887	17.7751	18.06	21.1497	18.0244	18.0747
242	17.9259	17.7545	18.1057	21.3047	18.0245	18.0863
243	17.9269	17.8176	18.0945	21.2581	17.9867	18.0318
244	17.9496	17.6613	18.1422	21.0242	18.0788	18.2385
245	17.9484	17.7765	18.1569	20.9808	18.1657	18.0963
246	17.8071	17.6738	18.1668	20.8316	18.03	18.1411
247	17.932	17.769	18.1038	21.146	18.0215	18.0246
248	17.7974	17.8286	18.1797	20.9167	18.0764	18.1082
249	17.8258	17.8952	18.1355	20.9403	18.0823	17.944
250	17.873	17.7584	18.1494	20.9659	18.0969	17.96
251	17.8259	17.8087	18.2071	20.5781	18.0701	18.0441
252	17.8427	17.8608	18.2274	20.5076	18.0822	18.2142
253	17.7933	17.9464	18.2138	20.8193	18.1605	18.2751
254	17.7603	17.8371	18.1155	20.9743	17.9357	17.9443
255	17.801	17.9054	18.1913	21.2687	18.0739	17.9046
256	17.7959	17.9272	18.1562	21.1952	18.1087	17.9963
257	17.7979	17.9593	18.1738	21.475	18.0688	17.8541
258	17.9039	17.8584	18.2156	21.3134	18.0619	17.9875
259	17.8803	17.8134	18.1237	21.0279	18.0732	17.8692
260	17.9056	17.845	18.0572	21.0601	18.131	17.8445
261	17.9091	17.9154	18.1441	21.0452	18.0288	17.8507
262	17.9455	17.8878	18.1119	21.0231	18.0066	18.1197
263	17.9324	17.8494	18.018	21.0914	18.0283	18.0542
264	17.9459	17.8982	18.0431	21.0563	18.1002	18.0218
265	17.8939	17.8333	18.0622	20.834	17.9605	17.933
266	17.9041	17.8309	18.001	20.9555	17.9527	17.9214
267	17.8579	17.8601	18.0392	21.2227	18.0058	18.0286
268	17.9699	17.9639	18.0074	21.1565	18.0873	18.0169
269	18.0493	17.8376	18.0215	20.9414	18.0476	18.1734
270	18.1228	17.8925	18.0886	20.8437	18.1643	17.9665
271	18.0657	18.0494	18.0283	21.0947	18.1828	17.9895
272	18.058	18.004	18.0973	20.7793	18.0281	18.0654
273	18.0369	17.9804	18.0457	20.8794	18.0467	18.1157
274	18.054	17.8722	18.03	20.8021	18.0418	18.0564
275	17.99	17.8952	17.9687	20.8966	17.9569	18.028
276	17.8284	17.745	18.0617	20.9101	17.9374	17.9184
277	17.9362	17.8484	17.9499	20.6118	18.017	17.9334
278	18.0558	17.9191	18.0434	20.9967	18.0382	17.942
279	18.0159	17.8984	18.0249	20.8854	17.9841	17.9571
280	18.1617	17.8878	18.1181	20.8668	17.9395	17.8058
281	18.0256	17.883	17.974	20.6373	18.0229	17.919
282	18.103	17.9543	18.0279	20.4724	17.972	17.8843
283	18.0588	17.7995	18.0056	20.5026	17.8964	17.9118
284	18.1274	17.8287	18.046	20.672	17.9766	17.8361
285	18.0989	17.9271	18.0396	20.5229	18.0362	17.9058
286	18.1859	17.9341	18.02	20.3692	18.0037	17.9197
287	18.1451	17.9082	18.0364	20.4034	18.004	17.8138
288	18.1326	17.9916	18.0038	20.4823	18.0305	17.7851
289	18.2445	17.8086	18.0306	20.4329	17.9917	17.875
290	18.1103	17.9019	18.0464	20.0195	18.0226	17.804
291	18.1935	17.8955	18.0177	19.9881	17.8752	17.8543
292	18.1741	17.916	18.0395	19.8787	17.9736	17.8218
293	18.15	17.8964	18.0853	20.0167	17.9774	17.7484
294	18.159	17.8374	18.0078	19.7986	17.9849	17.8704
295	18.1821	17.8694	18.0627	20.02	18.0197	17.7892
296	18.1486	17.8798	18.0116	19.5893	18.0688	17.7717
297	18.1645	17.922	18.041	19.5659	18.1232	17.7572
298	18.1031	17.8002	17.9805	19.3724	18.0624	17.7394
299	18.1739	17.8296	17.9795	19.2597	18.0509	17.8703
300	18.1611	17.7814	18.0043	19.1904	18.0426	17.8143
301	18.1787	17.8638	18.0524	19.3927	18.0265	17.7643
302	18.1349	17.9033	18.1826	19.2179	18.0706	17.7738
303	18.1816	17.9153	18.0716	19.4596	18.0118	17.883
304	17.9883	17.9708	17.9235	19.2409	18.0336	17.8116
305	18.0474	17.8921	18.07	19.5073	18.0058	17.8416
306	18.1719	17.9039	18.0203	19.378	17.9598	17.7826
307	18.1467	17.8481	18.0744	19.3991	18.0103	17.6885
308	18.1344	17.8097	18.1106	19.4536	17.9419	17.8876
309	18.1218	17.8189	18.1119	19.364	17.9998	17.9057
310	18.1103	17.6367	18.0881	19.7619	17.9413	17.8502
311	18.1308	17.7264	18.1021	19.6045	17.8417	17.8401
312	18.2559	17.5942	18.0616	19.939	17.9093	17.7419
313	18.2899	17.6906	18.0721	20.1691	17.9214	17.8814
314	18.2126	17.7137	18.0715	20.0482	17.8942	17.8494
315	18.2008	17.735	17.9664	20.1874	17.9065	17.8441
316	18.25	17.7793	17.9958	20.0218	17.9526	17.9799
317	18.1518	17.8069	18.0914	19.9211	18.0329	17.7994
318	18.1238	17.6422	18.0374	20.0385	18.0222	17.8636
319	18.1333	17.7553	18.0686	20.0603	17.863	17.7809
320	18.1481	17.7655	18.0886	19.6289	17.9845	17.8076
321	18.2208	17.6979	18.0016	19.7751	17.9381	17.7781
322	18.2691	17.8457	18.1238	19.8795	18.0698	17.8704
323	18.1353	17.7846	18.0198	20.0414	17.9341	17.9371
324	18.2096	17.889	18.0952	20.0877	17.9553	17.8546
325	18.2594	17.7196	17.9411	20.1391	18.0126	17.766
326	18.1158	17.6366	18.1341	19.6984	18.0803	17.8772
327	18.1127	17.6952	18.0149	19.7458	18.0442	17.8849
328	18.1512	17.763	18.197	19.4738	18.0578	17.8207
329	18.0704	17.8143	18.1294	19.4558	17.955	17.7799
330	18.0808	17.8068	18.0329	19.5304	18.1337	17.8903
331	18.0841	17.8138	18.0246	19.6126	18.0333	17.9018
332	18.084	17.9672	17.9337	19.3221	17.9633	17.8352
333	18.1168	17.8589	17.9632	19.6439	18.0857	17.8996
334	18.0774	17.8443	18.1233	19.7487	18.0613	17.8259
335	17.9819	17.9976	17.9023	19.4379	17.8607	17.8654
336	17.989	17.8974	18.035	19.5055	18	17.8554
337	18.155	17.9041	17.9169	19.5089	17.8824	17.8775
338	18.1686	17.8625	17.9291	19.5982	17.9633	17.8701
339	18.1525	17.9308	18.0221	19.4307	17.9142	17.8346
340	18.1416	17.8255	17.9984	19.3342	17.8627	17.861
341	18.1484	17.8701	18.0397	19.1795	17.9044	17.8565
342	18.1972	17.9203	17.9081	19.2558	17.9351	17.8243
343	18.1636	17.8455	17.9811	19.2748	17.8094	17.7065
344	18.0464	17.8141	17.9739	19.1313	17.8659	17.8553
345	18.181	17.9428	18.0176	19.0422	17.9378	17.7576
346	18.2388	17.8235	17.9345	18.8628	17.9991	17.8592
347	18.124	17.8193	18.0683	18.9853	17.9581	17.6776
348	18.1337	17.7979	18.0204	19.3546	17.7748	17.782
349	17.9806	17.7976	17.994	18.9715	17.791	17.6429
350	18.0695	17.8643	18.0867	18.6877	17.8964	17.7176
351	18.2083	17.8271	17.9327	18.7411	17.8357	17.6932
352	18.279	17.8336	17.9425	18.3475	17.8237	17.5896
353	18.2626	17.881	17.9828	18.749	17.9011	17.6508
354	18.3104	17.8366	18.0891	18.6469	17.8955	17.5678
355	18.2758	17.8484	17.8723	18.5364	17.9888	17.6327
356	18.2233	17.7495	18.0655	18.5383	17.8813	17.6852
357	18.1938	17.8266	18.0776	18.5216	17.9399	17.6613
358	18.2329	17.8225	17.9995	18.5244	17.9787	17.78
359	18.281	17.7975	17.9406	18.6326	18.0448	17.7375
360	18.1445	17.8226	17.931	18.2973	17.9794	17.7403
361	18.1193	17.7281	17.9277	18.2879	17.94	17.757
362	18.1381	17.8292	17.9889	18.1647	17.9504	17.6057
363	18.1435	17.732	17.9985	18.3001	18.0307	17.5962
364	18.1402	17.862	18.0173	18.4021	18.0115	17.7115
365	18.3024	17.8555	18.0519	18.7028	17.9884	17.703
366	18.1822	17.8326	18.0913	18.6173	17.9127	17.7696
367	18.3338	17.737	18.0721	18.6671	17.9284	17.6479
368	18.2084	17.7809	17.9927	18.4657	17.9926	17.7388
369	18.2427	17.7903	17.9761	18.4107	17.9583	17.6728
370	18.28	17.8178	18.0049	18.6459	18.0175	17.649
371	18.1554	17.7902	17.9788	18.4642	17.9311	17.6847
372	18.1711	17.9225	18.058	18.5411	17.9838	17.7822
373	18.2513	17.9736	17.9866	18.4667	18.0184	17.7276
374	18.322	17.8944	17.9755	18.6451	17.9786	17.7935
375	18.1888	17.9751	18.0431	18.7318	17.9529	17.8877
376	18.2297	17.925	17.9974	18.7501	17.8357	17.6965
377	18.212	17.8252	17.9875	18.5458	17.9357	17.782
378	18.2278	17.933	17.8814	18.6486	17.8228	17.7914
379	18.2287	17.7821	18.1939	18.7418	17.8396	17.7026
380	18.2021	17.8504	18.0251	18.8176	17.8198	17.7298
381	18.3944	17.8085	17.9968	18.8621	17.9894	17.8115
382	18.2112	17.9262	17.9947	18.6933	17.8666	17.6875
383	18.1452	17.7493	18.0484	18.8698	17.8368	17.6591
384	18.1301	17.9201	17.9289	18.8385	17.8432	17.7386
385	18.0783	18.0123	17.8922	19.2736	17.8518	17.7654
386	18.165	17.8914	18.0298	19.0759	17.8953	17.565
387	18.0643	17.8701	17.9167	19.003	17.7965	17.6514
388	18.114	17.9931	18.069	18.9804	17.893	17.7067
389	18.2327	17.8451	18.0035	18.8973	17.9657	17.6501
390	18.2931	17.926	18.1085	18.7716	17.9275	17.695
391	18.1887	17.9434	17.9669	18.7425	17.7918	17.7971
392	18.2568	17.9089	18.0036	18.8818	17.9141	17.7412
393	18.1914	17.91	18.0162	19.1348	17.9715	17.6701
394	17.9686	17.8612	18.0251	19.0637	17.9986	17.8573
395	18.0789	17.8565	17.9713	19.1699	17.9768	17.7568
396	18.1066	17.914	18.0043	19.2555	17.9793	17.7961
397	18.2775	17.871	17.9341	19.3611	17.9059	17.8794
398	18.2716	17.9933	17.9874	19.6129	17.8922	17.7684
399	18.2692	17.9766	18.0341	19.4222	18.001	17.6853
400	18.4999	17.7951	18.0787	19.4172	17.9202	17.7697
401	18.3974	17.8926	18.1168	19.5116	17.9287	17.6898
402	18.258	18.0637	17.9638	19.5957	18.0422	17.6922
403	18.2113	17.8539	17.9183	19.6423	18.0332	17.8705
404	18.306	18.0083	18.0035	19.564	17.9712	17.7085
405	18.2545	17.9529	18.0311	19.8698	17.8292	17.7008
406	18.2683	17.9269	17.9587	19.9389	18.023	17.9154
407	18.2388	18.028	17.8905	19.982	18.0792	18.0037
408	18.3014	17.9643	17.9385	19.9394	17.9932	17.9512
409	18.196	18.1076	18.048	19.6018	17.9186	18.0761
410	18.044	18.1047	17.8914	19.8245	17.9458	17.845
411	18.2313	18.0376	17.933	19.9763	17.9705	17.9556
412	18.2353	18.0494	17.9673	19.9095	17.9705	17.8411
413	18.1164	18.059	17.9951	19.9915	17.9579	17.8796
414	18.2079	18.0184	17.9128	19.8031	17.9192	17.7541
415	18.2613	18.1478	17.8568	19.8977	17.8979	18.0816
416	18.3058	18.0606	17.9538	19.9658	17.9744	18.0619
417	18.3038	18.0455	18.0124	20.0356	17.8352	17.8914
418	18.2047	18.064	17.891	19.843	17.8525	17.8594
419	18.1066	18.0953	17.8094	19.8274	17.9099	17.9387
420	18.1786	18.0918	17.9908	19.8513	17.9579	18.0177
421	18.1495	18.0846	17.938	19.817	17.8037	18.001
422	18.0042	18.0968	17.9002	19.9097	17.9091	17.8389
423	17.9651	17.9664	17.8912	19.7259	17.9697	17.8314
424	18.0485	17.9427	18.006	20.0222	17.892	17.8465
425	17.9717	18.0587	17.9322	19.9959	17.9958	17.8942
426	18.0537	18.0359	17.8306	19.9873	17.9261	17.9726
427	17.9747	17.9796	18.0499	20.2301	17.9714	17.839
428	18.0934	18.0242	17.9096	20.249	18.0321	17.8045
429	18.0325	17.9853	17.9421	20.1735	17.8864	17.8384
430	18.0662	18.0821	17.9603	20.1153	17.8189	17.6656
431	17.9497	18.0465	17.9714	19.848	17.8146	17.6651
432	18.0897	18.0983	17.9272	19.9594	17.9001	17.7527
433	18.1234	17.9089	18.0362	20.0073	17.8875	17.8125
434	18.1912	17.9307	18.0239	19.9635	18.0109	17.6149
435	18.0316	17.9147	17.9176	20.0086	17.9682	17.5074
436	17.9843	17.8905	17.9436	20.0039	17.9004	17.6927
437	18.0712	17.9767	17.8627	19.7018	17.9355	17.6425
438	18.1806	18.0427	17.9462	19.8459	17.9013	17.6746
439	18.1481	18.0784	17.9335	19.7828	17.9997	17.633
440	18.1768	18.0277	17.8143	19.653	17.9569	17.7916
441	18.2159	18.0716	17.834	19.7493	17.8701	17.549
442	18.2215	18.0717	17.9467	19.8023	17.871	17.6522
443	18.2309	18.0577	17.9257	20.1307	17.8088	17.7024
444	18.2383	18.0098	17.8731	20.0767	17.7949	17.7112
445	18.2594	17.9497	17.9659	19.9948	17.8383	17.7813
446	18.2712	18.0974	17.8915	20.5685	17.9322	17.765
447	18.2409	17.9797	17.8953	20.5369	17.8592	17.7398
448	18.2337	18.0308	17.9571	20.5059	17.9454	17.6351
449	18.3077	17.906	17.8254	20.6352	17.965	17.703
450	18.2999	17.7951	17.9379	19.4172	17.8949	17.6176
451	18.2974	17.8926	17.9039	19.5116	17.8925	17.6953
452	18.258	18.0637	18.0289	19.5957	17.864	17.7823
453	18.2113	17.8539	18.1396	19.6423	17.8725	17.6833
454	18.306	18.0083	18.1402	19.564	17.7729	17.7157
455	18.2545	17.9529	18.0908	19.8698	17.8709	17.6337
456	18.2683	17.9269	18.2056	19.9389	17.8721	17.6962
457	18.2388	18.028	18.067	19.982	17.8741	17.7278
458	18.2014	17.9643	18.1974	19.9394	17.8632	17.6321
459	18.196	18.1076	18.0949	19.6018	17.9114	17.6528
460	18.044	18.1047	18.0123	19.8245	17.7715	17.6385
461	18.2313	18.0376	18.0337	19.9763	17.911	17.7149
462	18.2353	18.0494	18.0793	19.9095	17.8611	17.7058
463	18.1164	18.059	18.0689	19.9915	17.8487	17.6791
464	18.2079	18.0184	18.0144	19.8031	17.8085	17.7338
465	18.2613	18.1478	18.0637	19.8977	17.8378	17.8174
466	18.2058	18.0606	18.2674	19.9658	17.8865	17.6406
467	18.2038	18.0455	18.1628	20.0356	17.8567	17.8027
468	18.2047	18.064	18.2542	19.843	17.9284	17.6508
469	18.1066	18.0953	18.1688	19.8274	17.7852	17.7478
470	18.1786	18.0918	18.1747	19.8513	17.8539	17.7932
471	18.1495	18.0846	18.2275	19.817	17.9044	17.8343
472	18.0042	18.0968	18.1968	19.9097	17.882	17.7761
473	17.9651	17.9664	18.0735	19.7259	17.8196	17.7244
474	18.0485	17.9427	18.1901	20.0222	17.945	17.7363
475	17.9717	18.0587	18.1586	19.9959	17.8776	17.7042
476	18.0537	18.0359	18.2146	19.9873	17.8553	17.782
477	17.9747	17.9796	18.1936	20.2301	17.8549	17.8857
478	18.0934	18.0242	18.0678	20.249	17.8518	17.7495
479	18.0325	17.9853	17.9972	20.1735	17.9578	17.888
480	18.0662	18.0821	18.104	20.1153	17.8279	17.8356
481	17.9497	18.0465	18.1776	19.848	17.9827	17.7359
482	18.0897	18.0983	18.1209	19.9594	17.8388	17.6494
483	18.1234	17.9089	18.1705	20.0073	17.9929	17.6787
484	18.1912	17.9307	18.0966	19.9635	17.9337	17.814
485	18.0316	17.9147	18.1528	20.0086	17.931	17.8224
486	17.9843	17.8905	18.1919	20.0039	17.9168	17.8861
487	18.0712	17.9767	18.1997	19.7018	17.9224	17.8213
488	18.1806	18.0427	18.2788	19.8459	17.8877	17.751
489	18.1481	18.0784	18.2201	19.7828	17.9598	17.7602
490	18.1768	18.0277	18.2813	19.653	17.867	17.8705
491	18.2159	18.0716	18.2415	19.7493	17.8991	17.8536
492	18.2215	18.0717	18.2679	19.8023	17.8759	17.8401
493	18.2309	18.0577	18.2413	20.1307	17.9965	17.899
494	18.1383	18.0098	18.1397	20.0767	17.8657	17.8674
495	18.1594	17.9497	18.2519	19.9948	17.7634	17.9246
496	18.1712	18.0974	18.1536	20.5685	17.8561	17.8432
497	18.1409	17.9797	18.232	20.5369	17.808	17.9164
498	18.2337	18.0308	18.2945	20.5059	17.8647	17.9518
499	18.1077	17.906	18.2014	20.6352	17.8748	17.7621
Average	17.9881	17.8868	18.0506	19.6628	17.9732	17.8908

## Sheet: Dihydrofolate reductase
	CHEMBL1966988	CHEMBL340488	ZINC000016682862	ZINC000828645375	CHEMBL3901573	DHFR
0	17.3198	17.3332	17.1469	17.3546	17.4162	17.2966
1	17.139	17.2523	17.3116	17.2469	17.3692	17.3835
2	17.5022	17.3637	17.2493	17.229	17.4477	17.3137
3	17.3903	17.2684	17.1903	17.2613	17.3208	17.3582
4	17.3718	17.2307	17.28	17.6031	17.2142	17.2324
5	17.2237	17.1348	17.3529	17.3953	17.2783	17.3174
6	17.1982	17.3049	17.5262	17.3358	17.3887	17.2145
7	17.2362	17.4063	17.556	17.494	17.3064	17.2728
8	17.2308	17.3331	17.2961	17.4808	17.2917	17.3095
9	17.0969	17.2717	17.5314	17.4878	17.4122	17.2046
10	17.086	17.4699	17.4474	17.5467	17.237	17.3437
11	17.027	17.3723	17.359	17.4488	17.2359	17.3676
12	17.1683	17.322	17.3512	17.5011	17.4184	17.3555
13	17.1796	17.4162	17.4593	17.8075	17.3322	17.3472
14	17.0481	17.4381	17.3645	17.6976	17.3589	17.3088
15	17.1161	17.3468	17.5226	17.6064	17.4289	17.3335
16	17.1718	17.3032	17.4418	17.6713	17.2611	17.4321
17	17.1116	17.3967	17.5455	17.6533	17.1576	17.3119
18	17.1512	17.582	17.6018	17.6644	17.2183	17.3191
19	17.0453	17.3864	17.4311	17.622	17.2141	17.4003
20	17.0015	17.3139	17.5214	17.6772	17.181	17.4067
21	17.0674	17.275	17.5932	17.5954	17.257	17.39
22	17.0498	17.4118	17.4706	17.9248	17.1081	17.4489
23	17.0579	17.3017	17.4281	17.6295	17.1249	17.3704
24	17.1074	17.3809	17.551	17.7339	17.3407	17.3833
25	17.2749	17.3397	17.399	17.9071	17.2098	17.3756
26	17.2697	17.3682	17.502	17.7333	17.1393	17.455
27	17.2749	17.3095	17.5579	17.7474	17.1249	17.3909
28	17.2033	17.6612	17.5263	17.8381	17.2022	17.4184
29	17.3327	17.8037	17.5358	17.8989	17.2804	17.416
30	17.3485	17.7493	17.5318	17.8582	17.4711	17.2868
31	17.3633	17.6295	17.4475	17.8714	17.497	17.4402
32	17.3422	17.7758	17.5416	18.0626	17.5126	17.2975
33	17.3464	17.8668	17.4462	17.8191	17.3032	17.3792
34	17.4893	17.5309	17.3654	17.7911	17.322	17.3787
35	17.3713	17.5769	17.4893	17.6467	17.4653	17.3951
36	17.3235	17.6751	17.4501	17.5765	17.487	17.4095
37	17.3743	17.7443	17.4614	17.6599	17.4058	17.3994
38	17.1143	17.7084	17.4517	17.6904	17.3802	17.3526
39	17.1496	17.7433	17.3426	17.5223	17.2256	17.3704
40	17.1931	17.6485	17.4627	17.5585	17.1816	17.4833
41	17.2222	17.6585	17.4931	17.6252	17.2045	17.3762
42	17.3208	17.6804	17.5012	17.9259	17.0537	17.4163
43	17.2501	17.6393	17.4478	17.7032	17.2521	17.4047
44	17.2935	17.3104	17.5932	17.3443	17.1844	17.3581
45	17.3295	17.6668	17.7094	17.4709	17.0196	17.4504
46	17.4816	17.4936	17.5103	17.555	16.8858	17.4126
47	17.4428	17.5395	17.4576	17.5819	16.8412	17.4075
48	17.2711	17.6904	17.2868	17.5005	16.944	17.4333
49	17.3116	17.5369	17.244	17.2993	17.0745	17.4814
50	17.3082	17.5362	17.3162	17.5132	17.1354	17.4162
51	17.2572	17.4014	17.4367	17.3831	17.1281	17.466
52	17.1944	17.4149	17.2203	17.4885	17.1488	17.4321
53	17.2372	17.396	17.5222	17.5587	17.0942	17.3906
54	17.2925	17.4678	17.3869	17.5226	17.1489	17.3141
55	17.3619	17.4612	17.364	17.6047	17.0035	17.3326
56	17.4679	17.5738	17.4362	17.7935	17.0277	17.3934
57	17.4917	17.4319	17.414	17.6829	16.9645	17.4533
58	17.3711	17.3422	17.348	17.6531	16.8942	17.3501
59	17.4336	17.2961	17.2266	17.6144	16.8503	17.4026
60	17.3771	17.3238	17.4278	17.5178	16.7972	17.38
61	17.3398	17.3694	17.3654	17.6002	16.741	17.4127
62	17.3361	17.5298	17.3058	17.4533	16.782	17.341
63	17.3091	17.443	17.2538	17.5934	16.7978	17.3286
64	17.5146	17.3858	17.2858	17.6608	16.8943	17.4096
65	17.1509	17.352	17.3073	17.4999	16.967	17.4688
66	17.1482	17.3785	17.3304	17.7147	17.0309	17.4621
67	17.2299	17.3125	17.2376	17.4726	16.8967	17.4323
68	17.5119	17.1552	17.2857	17.4992	16.9518	17.453
69	17.2858	17.3845	17.5382	17.3694	16.8139	17.4884
70	17.3935	17.4254	17.3452	17.2356	16.879	17.332
71	17.2865	17.5099	17.3417	17.1869	16.8943	17.3011
72	17.2666	17.8165	17.4232	17.3893	16.8839	17.4843
73	17.3804	17.6248	17.4889	17.537	16.8666	17.3383
74	17.358	17.7132	17.6657	17.5336	16.889	17.323
75	17.2318	17.7101	17.5239	17.5403	16.9396	17.2947
76	17.252	17.7737	17.5499	17.406	16.928	17.3053
77	17.3293	17.6382	17.4624	17.3737	16.9049	17.4598
78	17.528	17.4706	17.4515	17.2996	16.8228	17.3976
79	17.2688	17.5855	17.4604	17.2891	16.8779	17.2854
80	17.402	17.3028	17.2364	17.5777	16.8545	17.215
81	17.392	17.2222	17.3085	17.3943	16.9833	17.2398
82	17.2668	17.0047	17.3848	17.2664	16.8478	17.1565
83	17.3452	17.0432	17.57	17.4564	16.837	17.1709
84	17.3122	17.2094	17.4677	17.3476	16.9021	17.2063
85	17.3619	17.1302	17.4489	17.481	16.8572	17.2069
86	17.3954	17.3532	17.6329	17.6486	16.8757	17.2236
87	17.3447	17.3844	17.5147	17.4664	16.9682	17.1945
88	17.3882	17.1885	17.486	17.3509	16.8455	17.1512
89	17.3588	17.4431	17.5905	17.5502	16.8889	17.1188
90	17.3815	17.2751	17.3061	17.7078	16.7803	17.1961
91	17.3926	17.2507	17.3705	17.5644	16.9225	17.1166
92	17.3269	17.2863	17.3192	17.4491	16.8104	17.1601
93	17.3572	17.2894	17.4756	17.6024	16.8357	17.2066
94	17.3958	17.3551	17.6461	17.4383	16.9227	17.1603
95	17.3216	17.4796	17.579	17.3649	16.9023	17.1471
96	17.3479	17.4085	17.5895	17.6787	16.7712	17.2635
97	17.4232	17.381	17.3437	17.5212	16.7391	17.2653
98	17.4829	17.3987	17.3516	17.4784	16.7226	17.1853
99	17.4072	17.4482	17.4721	17.4287	16.8591	17.1292
100	17.41	17.2739	17.4311	17.331	16.8378	17.1676
101	17.4543	17.5787	17.5375	17.4537	16.7235	17.2231
102	17.574	17.497	17.4515	17.5209	16.8829	17.1958
103	17.4083	17.4349	17.4366	17.4911	16.7991	17.2626
104	17.5946	17.3483	17.434	17.4471	16.8811	17.2765
105	17.3811	17.5361	17.4598	17.6097	16.8237	17.2611
106	17.4121	17.4725	17.4427	17.4341	16.8489	17.3162
107	17.5917	17.5433	17.4567	17.4201	16.7548	17.3847
108	17.6473	17.58	17.4302	17.3109	16.7974	17.425
109	17.5729	17.7291	17.38	17.3431	16.9672	17.363
110	17.4431	17.6824	17.4017	17.6011	16.8573	17.3484
111	17.5916	17.5409	17.4211	17.3531	16.9074	17.3356
112	17.5972	17.4476	17.2941	17.3591	17.0244	17.4712
113	17.4675	17.4209	17.3666	17.2826	17.0047	17.4925
114	17.5431	17.3813	17.2927	17.3316	17.0499	17.4845
115	17.3683	17.3261	17.4734	17.326	17.0803	17.4847
116	17.1989	17.3175	17.519	17.3153	17.1446	17.4057
117	17.285	17.3247	17.3211	17.3445	16.9508	17.4129
118	17.2914	17.2392	17.3912	17.3897	17.0975	17.4222
119	17.3084	17.2584	17.4391	17.5911	17.1727	17.4664
120	17.3842	17.236	17.4482	17.5089	17.1591	17.4661
121	17.4649	17.2773	17.6427	17.4721	17.2177	17.4376
122	17.396	17.3089	17.5399	17.5265	17.1103	17.4365
123	17.3936	17.3369	17.3814	17.5331	17.1956	17.3253
124	17.4145	17.2472	17.4244	17.4456	17.1262	17.4884
125	17.3399	17.2466	17.6997	17.3743	17.68	17.4084
126	17.3997	17.1712	17.4725	17.4975	17.471	17.4653
127	17.3512	17.2398	17.6337	17.4689	17.4134	17.422
128	17.2415	17.2168	17.4231	17.5237	17.447	17.428
129	17.3611	17.2422	17.4008	17.3473	17.3672	17.4778
130	17.2978	17.1278	17.2853	17.4957	17.4176	17.4098
131	17.2648	17.231	17.4178	17.2795	17.3806	17.3015
132	17.3621	17.1831	17.4536	17.2387	17.4878	17.4205
133	17.3214	17.0648	17.3458	17.3591	17.3388	17.3858
134	17.2211	17.1489	17.4971	17.5917	17.1896	17.357
135	17.3209	17.1248	17.5734	17.4213	17.0614	17.4434
136	17.5488	17.1066	17.4812	17.3888	17.0412	17.475
137	17.4128	17.0115	17.4773	17.5748	17.238	17.334
138	17.4738	17.0381	17.5585	17.2855	16.9814	17.3258
139	17.4211	16.9409	17.468	17.39	17.2506	17.4252
140	17.2633	16.9922	17.5186	17.3006	17.2488	17.3652
141	17.4854	17.1276	17.3419	17.1537	17.1746	17.3153
142	17.2622	17.1226	17.239	17.1584	17.0317	17.3541
143	17.3324	16.9748	17.4958	17.4338	16.9678	17.4816
144	17.1787	17.0941	17.5566	17.4995	17.0929	17.4273
145	17.1816	17.0384	17.5048	17.5103	17.1164	17.3465
146	17.3823	17.0721	17.2707	17.4719	17.2737	17.3627
147	17.4795	17.0346	17.3036	17.6468	17.038	17.4139
148	17.4297	17.0614	17.3041	17.3586	17.0642	17.4128
149	17.4704	17.1337	17.3117	17.1238	17.1616	17.4983
150	17.5698	17.1488	17.364	17.3027	16.9759	17.5327
151	17.2979	17.0818	17.3382	17.3022	17.0793	17.586
152	17.2092	17.0932	17.4465	17.2973	17.1498	17.5101
153	17.1029	17.0444	17.4655	17.3404	17.2658	17.4472
154	17.2656	17.2255	17.3673	17.3087	17.2125	17.4446
155	17.2661	17.1943	17.2905	17.1318	17.1394	17.4968
156	17.2916	17.1376	17.2698	17.2684	17.2718	17.3848
157	17.3116	17.165	17.2005	17.2784	17.2444	17.3551
158	17.3397	17.2124	17.1291	17.3457	17.1527	17.3799
159	17.4375	17.0849	17.0921	17.2464	17.071	17.3182
160	17.4484	17.1521	17.2286	17.3588	17.1597	17.3476
161	17.5716	17.0737	17.1787	17.2383	17.0323	17.4503
162	17.4288	16.989	17.2528	17.192	17.0791	17.3247
163	17.5812	17.1136	17.1993	17.4404	17.1969	17.2214
164	17.6327	17.0543	17.1638	17.3036	17.2514	17.1416
165	17.5666	17.0014	17.1823	17.1541	17.3178	17.2296
166	17.6345	17.0708	17.2698	17.2673	17.3221	17.1255
167	17.5967	16.9564	17.2911	17.2069	17.3669	17.2029
168	17.5651	16.9825	17.271	17.2598	17.2215	17.3653
169	17.5523	16.9499	17.3601	17.3707	17.3582	17.4223
170	17.6779	17.0063	17.4528	17.3209	17.2809	17.289
171	17.5637	16.9758	17.2162	17.4414	17.2646	17.3422
172	17.5372	17.0804	17.2517	17.2778	17.2951	17.2255
173	17.5628	16.8883	17.479	17.5238	17.2891	17.241
174	17.6186	16.9426	17.4567	17.4969	17.204	17.2202
175	17.6362	16.9133	17.245	17.5182	17.116	17.1759
176	17.6216	16.875	17.3842	17.5533	17.1471	17.1053
177	17.5534	16.9388	17.2718	17.4067	17.2622	17.2663
178	17.5899	16.9404	17.3195	17.2749	17.3257	17.3266
179	17.7491	17.0799	17.413	17.3534	17.3252	17.3966
180	17.4478	16.9864	17.2885	17.2814	17.3353	17.3522
181	17.4705	16.9993	17.4369	17.414	17.2297	17.4014
182	17.4566	16.9352	17.399	17.3414	17.2135	17.4763
183	17.3736	16.8468	17.4397	17.3352	17.0298	17.4348
184	17.463	17.0017	17.3924	17.285	17.0358	17.3535
185	17.594	17.0097	17.3601	17.388	16.9511	17.3455
186	17.5017	17.1237	17.3755	17.2623	17.0545	17.4159
187	17.5301	16.9627	17.309	17.3293	17.0685	17.4353
188	17.4057	17.014	17.462	17.3473	16.9263	17.3528
189	17.4144	16.9505	17.4511	17.3801	17.1305	17.3114
190	17.4195	17.0069	17.3395	17.6498	17.0025	17.431
191	17.4794	16.9402	17.4679	17.3882	17.0378	17.4521
192	17.3836	17.0299	17.366	17.5256	17.075	17.4265
193	17.581	16.9958	17.465	17.4546	17.0329	17.4615
194	17.5486	16.8007	17.4439	17.404	16.9999	17.4278
195	17.3849	16.8935	17.3604	17.554	16.9613	17.3758
196	17.6032	16.9736	17.5667	17.6189	17.0126	17.5551
197	17.5352	16.979	17.4384	17.3328	17.0206	17.5435
198	17.5051	17.0661	17.2897	17.5249	17.0133	17.4922
199	17.5762	16.9874	17.4659	17.4708	17.0323	17.4329
200	17.494	17.0121	17.3938	17.5308	17.0913	17.4535
201	17.5265	16.9447	17.3725	17.3803	17.1316	17.3013
202	17.5815	16.9302	17.4058	17.4384	16.9962	17.3449
203	17.6505	16.9229	17.353	17.4402	16.9758	17.364
204	17.565	16.8611	17.287	17.4559	16.9988	17.4117
205	17.6233	16.9522	17.3983	17.4391	17.1595	17.1459
206	17.6575	16.9541	17.3752	17.2698	17.0464	17.4812
207	17.7761	16.8078	17.2667	17.379	17.0237	17.2726
208	17.6081	16.9606	17.2867	17.4315	16.9208	17.4207
209	17.6029	16.8596	17.1882	17.4401	16.929	17.2899
210	17.5769	16.9084	17.2613	17.4064	16.835	17.4039
211	17.5753	16.8518	17.3291	17.4862	16.8182	17.4479
212	17.5734	16.7577	17.4557	17.4539	16.7393	17.4533
213	17.5982	16.928	17.4683	17.4926	16.7452	17.5303
214	17.6908	16.8591	17.3275	17.4275	16.7863	17.5024
215	17.478	16.9529	17.2495	17.5861	16.8148	17.3467
216	17.4642	16.9331	17.1882	17.4356	16.8116	17.4
217	17.3396	16.8512	17.2458	17.2922	16.8918	17.3184
218	17.5262	16.8547	17.2208	17.3985	16.993	17.4264
219	17.3397	16.8426	17.4544	17.3688	16.9485	17.3868
220	17.3146	16.9291	17.4131	17.29	17.0086	17.3493
221	17.4471	16.8602	17.5167	17.4553	17.2048	17.3239
222	17.5039	16.8752	17.4493	17.3375	16.926	17.4256
223	17.4458	16.7903	17.3531	17.4759	17.1962	17.401
224	17.4898	16.8364	17.279	17.3989	17.1162	17.3272
225	17.5175	16.8707	17.3691	17.4113	17.096	17.4537
226	17.4732	16.8682	17.4269	17.4859	17.1484	17.4879
227	17.6153	16.8261	17.3598	17.4034	17.0193	17.4871
228	17.6271	16.8068	17.415	17.4527	17.0841	17.3139
229	17.7979	16.7841	17.2599	17.3827	17.1831	17.4582
230	17.4789	16.7727	17.3287	17.433	17.2043	17.3352
231	17.3821	16.894	17.2344	17.3871	17.3091	17.2118
232	17.5669	16.8735	17.3444	17.5992	17.3143	17.1935
233	17.5171	16.8849	17.4543	17.4986	17.186	17.5548
234	17.6004	16.9164	17.3315	17.4582	17.2234	17.5499
235	17.6386	16.9218	17.1459	17.3347	17.0488	17.5046
236	17.5904	16.7709	17.1685	17.2507	17.1945	17.4179
237	17.5598	16.9106	17.2253	17.3055	17.1324	17.5114
238	17.4784	16.9062	17.2086	17.3944	17.1067	17.4826
239	17.4703	16.929	17.1497	17.3526	17.256	17.5167
240	17.5926	16.8996	17.0536	17.4456	17.297	17.4867
241	17.3441	16.8968	17.0553	17.419	17.3584	17.5229
242	17.3124	16.8161	17.2936	17.511	17.5565	17.3253
243	17.3555	16.8776	17.3114	17.4041	17.4977	17.3562
244	17.4771	17.0423	17.2407	17.4643	17.4093	17.2924
245	17.263	16.9997	17.1201	17.4027	17.3853	17.461
246	17.4763	17.0023	17.0883	17.3527	17.4391	17.6094
247	17.1805	16.9774	17.1389	17.3661	17.3234	17.4937
248	17.6128	16.9201	17.0882	17.3291	17.4128	17.3079
249	17.4425	16.9184	17.2112	17.3911	17.2798	17.5003
250	17.4398	16.8599	17.1395	17.3892	17.4933	17.5282
251	17.4762	16.8236	17.2123	17.3885	17.1783	17.4528
252	17.5206	16.9521	17.2369	17.3655	17.1775	17.4352
253	17.3434	16.8246	17.1911	17.3965	17.2986	17.2737
254	17.3924	16.8557	17.2012	17.3774	17.4696	17.223
255	17.3981	16.8273	17.2887	17.322	17.2359	17.229
256	17.3408	16.9582	17.1615	17.458	17.3216	17.1632
257	17.3329	16.755	17.1124	17.2671	17.2368	17.1621
258	17.3595	16.8777	17.0905	17.38	17.2986	17.3102
259	17.3678	16.8035	17.0897	17.2691	17.2383	17.2253
260	17.3528	16.8365	17.0447	17.3238	17.249	17.306
261	17.3192	16.8732	17.14	17.2829	17.1832	17.338
262	17.3745	16.7176	16.9759	17.346	17.29	17.3181
263	17.3895	16.8198	17.133	17.2839	17.1718	17.221
264	17.4295	16.702	17.1243	17.3429	17.3524	17.1422
265	17.5329	16.8332	17.2592	17.3863	17.5204	17.1444
266	17.3426	16.7524	17.1819	17.4818	17.2765	17.194
267	17.3547	16.7802	17.2598	17.3665	17.3752	17.3531
268	17.386	16.8805	17.276	17.4681	17.5121	17.2635
269	17.5725	16.8963	17.264	17.4032	17.4456	17.2552
270	17.4102	16.6865	17.3055	17.3905	17.4228	17.3388
271	17.628	16.8128	17.2162	17.4795	17.4458	17.3839
272	17.5008	16.8162	17.2743	17.4977	17.5612	17.2159
273	17.4778	16.9413	17.2683	17.5098	17.4764	17.2471
274	17.4394	16.8311	17.1061	17.3395	17.4853	17.2722
275	17.5374	16.78	17.1338	17.3928	17.533	17.2416
276	17.486	16.9631	17.1356	17.3203	17.377	17.1621
277	17.4402	16.8487	17.0747	17.5321	17.3862	17.2734
278	17.4912	16.7883	17.1556	17.4508	17.4854	17.1825
279	17.6542	16.8167	17.2054	17.3921	17.4562	17.2879
280	17.6116	16.8237	17.1193	17.3177	17.3944	17.3383
281	17.5285	16.7647	17	17.3879	17.4367	17.3559
282	17.6865	16.7738	17.1285	17.3746	17.4139	17.4442
283	17.5564	16.7604	17.2593	17.3099	17.3286	17.3725
284	17.4634	16.8086	17.135	17.3713	17.3468	17.3367
285	17.5362	16.8138	17.2662	17.3168	17.6081	17.4333
286	17.5304	16.8062	17.1465	17.432	17.5069	17.469
287	17.6422	16.8329	17.0392	17.3301	17.5417	17.4009
288	17.5896	16.7287	17.1153	17.4186	17.5171	17.4232
289	17.5034	16.6941	17.0068	17.3028	17.4673	17.5679
290	17.4815	16.7623	17.1058	17.4755	17.2473	17.3762
291	17.5706	16.7956	17.1393	17.3141	17.5069	17.4484
292	17.4863	16.7393	17.1547	17.4193	17.5708	17.415
293	17.428	16.8993	17.2042	17.3894	17.5594	17.401
294	17.461	16.7496	17.0281	17.277	17.3897	17.4327
295	17.4022	16.7227	17.0284	17.1442	17.532	17.4451
296	17.5437	16.7021	17.1401	17.3312	17.5611	17.3575
297	17.6323	16.7954	17.0658	17.3183	17.6081	17.338
298	17.4274	16.7437	17.1011	17.4395	17.5088	17.2411
299	17.4966	16.81	16.9865	17.425	17.5501	17.3743
300	17.4647	16.6505	17.1822	17.3769	17.5256	17.4065
301	17.5067	16.6706	17.1128	17.2191	17.5784	17.3626
302	17.616	16.7116	17.116	17.3977	17.4717	17.3442
303	17.5146	16.6768	17.1403	17.3909	17.5093	17.4055
304	17.6927	16.7539	17.1068	17.5103	17.5497	17.4756
305	17.7894	16.7177	17.1509	17.4305	17.6054	17.544
306	17.692	16.6725	17.0834	17.5193	17.6101	17.4523
307	17.5641	16.6597	17.1261	17.3855	17.6005	17.3204
308	17.4392	16.7094	17.1515	17.2511	17.6082	17.5482
309	17.4407	16.6697	17.0327	17.4272	17.6925	17.447
310	17.4073	16.6903	16.9842	17.3537	17.7405	17.3725
311	17.4991	16.6996	17.0486	17.3774	17.704	17.5119
312	17.4604	16.6584	17.1004	17.3997	17.4081	17.4258
313	17.6849	16.7464	17.1957	17.4897	17.3595	17.4579
314	17.7131	16.7434	17.1861	17.186	17.4018	17.4517
315	17.4696	16.8024	17.0716	17.2011	17.8816	17.4365
316	17.5522	16.6745	17.0026	17.3945	17.8978	17.4487
317	17.4801	16.7086	17.2154	17.4586	17.7258	17.4401
318	17.5373	16.7661	17.0524	17.3443	17.4969	17.4084
319	17.5756	16.7332	17.1526	17.4088	17.4673	17.3076
320	17.4532	16.7505	17.1307	17.3074	17.461	17.3075
321	17.5451	16.7617	17.0722	17.3992	17.567	17.3441
322	17.4275	16.7535	17.0766	17.3819	17.459	17.4607
323	17.4751	16.8477	16.9764	17.4083	17.4392	17.4719
324	17.5462	16.7336	17.0624	17.41	17.3003	17.3986
325	17.5585	16.6249	17.1437	17.4717	17.2887	17.4818
326	17.6183	16.7041	17.0761	17.4381	17.3476	17.4291
327	17.6187	16.7153	17.0907	17.4363	17.2379	17.4
328	17.4989	16.7197	17.1154	17.3931	17.3755	17.3605
329	17.4614	16.7013	17.022	17.3691	17.2743	17.4861
330	17.5985	16.7823	17.0801	17.3706	17.5048	17.3045
331	17.5029	16.7902	16.9564	17.3255	17.4978	17.4771
332	17.5435	16.7465	17.0627	17.2848	17.4218	17.4316
333	17.496	16.746	16.9273	17.2512	17.478	17.4104
334	17.4816	16.7017	16.9839	17.3836	17.5091	17.3305
335	17.4661	16.7329	17.0388	17.3155	17.6313	17.4948
336	17.5115	16.8261	16.9215	17.314	17.438	17.504
337	17.4651	16.6632	17.0003	17.3195	17.4496	17.4378
338	17.5632	16.7761	16.8994	17.2802	17.4005	17.4687
339	17.4325	16.919	16.8785	17.3945	17.4342	17.3968
340	17.5928	16.8867	16.7668	17.4554	17.5402	17.3724
341	17.5018	16.7594	16.8375	17.3877	17.6471	17.3815
342	17.4913	16.7746	16.7826	17.3647	17.5371	17.31
343	17.5132	16.749	16.806	17.4035	17.246	17.2618
344	17.4354	16.7748	16.7894	17.4985	17.4438	17.2225
345	17.5801	16.8633	16.8684	17.5721	17.3651	17.4344
346	17.4629	16.7686	16.9828	17.3011	17.3948	17.2711
347	17.5886	16.7899	16.8609	17.4936	17.5377	17.3898
348	17.6796	16.7843	16.9113	17.5643	17.3773	17.4686
349	17.5258	16.8066	16.888	17.3478	17.404	17.3506
350	17.6667	16.7332	16.9011	17.3255	17.4018	17.2529
351	17.5912	16.8378	16.8828	17.3321	17.3344	17.3881
352	17.6494	16.7564	16.8595	17.4498	17.3848	17.5064
353	17.5941	16.716	16.8107	17.5399	17.3584	17.4639
354	17.5598	16.772	16.7852	17.3362	17.4004	17.3931
355	17.5483	16.6491	16.9523	17.3415	17.3292	17.2533
356	17.5457	16.667	17.0118	17.3936	17.5459	17.3573
357	17.6624	16.7082	17.0237	17.3688	17.4234	17.3174
358	17.6288	16.6951	17.0706	17.4105	17.5049	17.2176
359	17.5141	16.6754	17.0535	17.3256	17.516	17.2877
360	17.6756	16.6885	17.0594	17.4392	17.5743	17.2531
361	17.5001	16.6792	17.1195	17.4793	17.4926	17.3595
362	17.5746	16.6891	17.0775	17.3402	17.496	17.3666
363	17.5367	16.7546	17.1989	17.4956	17.5228	17.4025
364	17.6221	16.6722	17.0178	17.4778	17.4816	17.4437
365	17.5128	16.7659	17.1555	17.5209	17.3779	17.4299
366	17.5558	16.7444	17.1041	17.5161	17.4578	17.3731
367	17.786	16.6999	17.1646	17.4941	17.3768	17.4767
368	17.5996	16.7615	16.9807	17.5597	17.4266	17.4767
369	17.7261	16.7854	16.9762	17.3145	17.5741	17.3083
370	17.5805	16.7276	16.9938	17.3533	17.6072	17.4499
371	17.4333	16.7751	16.8054	17.4966	17.5235	17.3907
372	17.6706	16.8131	16.9469	17.4583	17.5694	17.3269
373	17.5356	16.7131	17.0575	17.5198	17.5729	17.2455
374	17.7386	16.7359	17.1555	17.5415	17.3992	17.253
375	17.517	16.7596	17.0403	17.3058	17.4766	17.1779
376	17.5242	16.7497	17.1225	17.5175	17.547	17.349
377	17.5931	16.7333	17.1906	17.4235	17.712	17.2923
378	17.606	16.7274	17.1328	17.3805	17.4632	17.4138
379	17.6892	16.7062	17.0055	17.3583	17.454	17.388
380	17.5157	16.7848	17.0487	17.4412	17.4743	17.4779
381	17.5478	16.7958	17.1545	17.3063	17.4887	17.3302
382	17.6855	16.7709	17.0692	17.2824	17.5012	17.4206
383	17.5363	16.6568	17.036	17.4541	17.4563	17.4132
384	17.4011	16.7169	17.0598	17.312	17.3262	17.4807
385	17.529	16.7556	17.0883	17.4515	17.2419	17.4131
386	17.6763	16.8161	17.1017	17.4078	17.2582	17.4788
387	17.7371	16.7197	17.0823	17.353	17.0881	17.4966
388	17.5949	16.6857	17.0905	17.4779	17.2884	17.4222
389	17.5524	16.734	17.2993	17.4942	17.3197	17.31
390	17.6158	16.7277	17.0855	17.4209	17.5174	17.3306
391	17.7251	16.6844	17.1251	17.4114	17.5305	17.469
392	17.5131	16.7389	17.1802	17.3449	17.3633	17.3616
393	17.6622	16.7348	17.1153	17.3576	17.4078	17.4653
394	17.4831	16.6832	17.2005	17.2416	17.5293	17.4511
395	17.5046	16.7066	17.0115	17.3941	17.4445	17.4607
396	17.4638	16.7633	17.2019	17.4267	17.4316	17.4155
397	17.5798	16.6212	17.0568	17.4011	17.4248	17.3967
398	17.5018	16.6435	17.0154	17.3813	17.4417	17.3016
399	17.6893	16.7579	17.0024	17.451	17.4282	17.4014
400	17.4047	16.7787	17.1263	17.3692	17.2502	17.4591
401	17.5865	16.8554	17.0288	17.2341	17.2985	17.3171
402	17.5078	16.7584	17.0817	17.4063	17.2762	17.3594
403	17.7087	16.7276	17.2559	17.423	17.196	17.4351
404	17.5879	16.8075	17.1559	17.4084	17.1943	17.3486
405	17.5678	16.7508	17.173	17.3263	17.1906	17.2875
406	17.5805	16.7494	17.0827	17.3893	17.1611	17.4929
407	17.6894	16.6986	17.112	17.3242	17.2434	17.3779
408	17.5893	16.7543	17.1232	17.4644	17.1214	17.3855
409	17.557	16.7744	17.0372	17.3893	17.2943	17.2765
410	17.5758	16.8419	17.1217	17.3818	17.2892	17.2412
411	17.5135	16.7266	17.1046	17.3417	17.4086	17.4975
412	17.5254	16.8261	17.133	17.4297	17.3347	17.3988
413	17.6997	16.8462	17.1427	17.4857	17.4954	17.4853
414	17.5538	16.7784	17.1961	17.343	17.3334	17.3382
415	17.7247	16.75	17.1653	17.4566	17.3177	17.432
416	17.6767	16.7108	17.0977	17.5003	17.1651	17.3956
417	17.5719	16.6701	17.0934	17.4427	17.1026	17.4956
418	17.5259	16.732	16.9884	17.3597	17.1819	17.3182
419	17.5531	16.7309	16.9776	17.4352	17.2459	17.2846
420	17.5994	16.6682	17.0302	17.4967	17.2673	17.3141
421	17.585	16.7223	17.142	17.3139	17.1074	17.4419
422	17.7733	16.8042	16.9475	17.335	17.0291	17.491
423	17.5489	16.7055	16.927	17.4088	17.0621	17.425
424	17.6628	16.7187	17.0336	17.4503	17.1532	17.4437
425	17.5703	16.7651	17.029	17.3505	17.1831	17.3383
426	17.5273	16.8069	17.0379	17.5133	17.0968	17.4457
427	17.6889	16.7703	16.8954	17.4039	17.1392	17.3868
428	17.5547	16.7942	16.9625	17.3562	17.1024	17.5095
429	17.6221	16.7116	16.9049	17.458	17.2056	17.3347
430	17.7213	16.8034	16.9698	17.3766	17.2848	17.2192
431	17.5967	16.7213	17.059	17.4564	17.2776	17.4868
432	17.635	16.7036	16.9096	17.5244	17.2788	17.362
433	17.6705	16.6484	16.8782	17.4016	17.2566	17.3647
434	17.5805	16.6838	17.0069	17.3978	17.3228	17.4041
435	17.6896	16.6254	16.9057	17.2868	17.3032	17.2619
436	17.5851	16.6233	16.806	17.3212	17.2099	17.4969
437	17.7762	16.7164	16.9051	17.3139	17.3786	17.3569
438	17.5667	16.7201	16.7818	17.3677	17.2712	17.3699
439	17.4714	16.6444	16.8155	17.3868	17.2539	17.2688
440	17.5933	16.665	16.7821	17.4816	17.364	17.4921
441	17.6906	16.7256	16.7849	17.3421	17.4532	17.3791
442	17.5662	16.6415	16.8315	17.3785	17.3597	17.3067
443	17.644	16.7307	16.8219	17.3359	17.5268	17.2933
444	17.4652	16.6252	16.827	17.34	17.6601	17.2167
445	17.5379	16.7701	16.7787	17.2535	17.5408	17.3812
446	17.5982	16.7144	16.7857	17.3142	17.7867	17.3411
447	17.7296	16.7308	16.9024	17.3216	17.6614	17.4799
448	17.5657	16.7103	16.7816	17.4133	17.3679	17.3886
449	17.6698	16.7085	16.7741	17.3192	17.4392	17.415
450	17.6267	16.7787	17.1263	17.2483	17.2502	17.4591
451	17.5006	16.8554	17.0288	17.3533	17.2985	17.4171
452	17.5125	16.7584	17.0817	17.4375	17.2762	17.4594
453	17.6999	16.7276	17.2559	17.405	17.196	17.4351
454	17.6912	16.8075	17.1559	17.3354	17.1943	17.3486
455	17.7701	16.7508	17.173	17.3551	17.1906	17.3875
456	17.5259	16.7494	17.0827	17.4665	17.1611	17.4929
457	17.711	16.6986	17.112	17.3902	17.2434	17.3779
458	17.5975	16.7543	17.1232	17.3514	17.1214	17.4855
459	17.5396	16.7744	17.0372	17.3542	17.2943	17.4765
460	17.7278	16.8419	17.1217	17.4566	17.2892	17.4412
461	17.6751	16.7266	17.1046	17.3539	17.4086	17.3975
462	17.6273	16.8261	17.133	17.3991	17.3347	17.2988
463	17.6463	16.8462	17.1427	17.4764	17.4954	17.4853
464	17.5305	16.7784	17.1961	17.3004	17.3334	17.5382
465	17.4379	16.75	17.1653	17.3747	17.3177	17.232
466	17.6389	16.7108	17.0977	17.3897	17.1651	17.2956
467	17.6129	16.6701	17.0934	17.3494	17.1026	17.3956
468	17.5806	16.732	16.9884	17.4666	17.1819	17.4182
469	17.524	16.7309	16.9776	17.3594	17.2459	17.3846
470	17.5093	16.6682	17.0302	17.3982	17.2673	17.2141
471	17.7345	16.7223	17.142	17.2771	17.1074	17.3419
472	17.7035	16.8042	16.9475	17.3746	17.0291	17.391
473	17.6358	16.7055	16.927	17.2596	17.0621	17.325
474	17.614	16.7187	17.0336	17.434	17.1532	17.3437
475	17.6915	16.7651	17.029	17.2088	17.1831	17.4383
476	17.6974	16.8069	17.0379	17.3327	17.0968	17.4457
477	17.5174	16.7703	16.8954	17.2222	17.1392	17.4868
478	17.4813	16.7942	16.9625	17.3336	17.1024	17.2495
479	17.4949	16.7116	16.9049	17.324	17.2056	17.3347
480	17.5369	16.8034	16.9698	17.3011	17.2848	17.5192
481	17.5483	16.7213	17.059	17.2527	17.2776	17.3868
482	17.535	16.7036	16.9096	17.3615	17.2788	17.262
483	17.561	16.6484	16.8782	17.3433	17.2566	17.2647
484	17.6108	16.6838	17.0069	17.2269	17.3228	17.4041
485	17.6648	16.6254	16.9057	17.3276	17.3032	17.2619
486	17.6103	16.6233	16.806	17.2808	17.2099	17.4969
487	17.5906	16.7164	16.9051	17.3265	17.3786	17.3569
488	17.4277	16.7201	16.7818	17.3601	17.2712	17.2699
489	17.4378	16.6444	16.8155	17.3315	17.2539	17.2688
490	17.415	16.665	16.7821	17.3331	17.364	17.4921
491	17.672	16.7256	16.7849	17.3861	17.4532	17.4791
492	17.6165	16.6415	16.8315	17.4185	17.3597	17.5067
493	17.7372	16.7307	16.8219	17.2796	17.5268	17.4933
494	17.628	16.6252	16.827	17.3965	17.6601	17.4167
495	17.6849	16.7701	16.7787	17.2199	17.5408	17.3812
496	17.5959	16.7144	16.7857	17.2627	17.7867	17.3411
497	17.4144	16.7308	16.9024	17.2612	17.6614	17.4799
498	17.5882	16.7103	16.7816	17.3964	17.3679	17.2886
499	17.439	16.7085	16.7741	17.2675	17.4392	17.415
Average RG	17.478	16.9794	17.2125	17.42	17.2462	17.372

## Sheet: Methionine aminopeptidase 2
	CHEMBL3913373	CHEMBL1962731	CHEMBL3142997	ZINC000199197855	ZINC000016682972	MAP2
0	19.3495	19.4074	19.4714	19.3904	19.401	19.3836
1	19.4359	19.3957	19.3962	19.378	19.4421	19.5386
2	19.3671	19.3857	19.3944	19.4074	19.4386	19.5464
3	19.4215	19.4171	19.4236	19.381	19.5159	19.5362
4	19.407	19.4634	19.3905	19.3664	19.5389	19.5145
5	19.3277	19.4775	19.381	19.3899	19.5775	19.4985
6	19.3932	19.4791	19.4157	19.4159	19.478	19.4254
7	19.4194	19.3867	19.4163	19.3997	19.4192	19.4341
8	19.3876	19.4386	19.3888	19.4338	19.4898	19.5067
9	19.4573	19.466	19.3993	19.3618	19.4128	19.5853
10	19.3697	19.465	19.4334	19.3986	19.5273	19.502
11	19.3697	19.4073	19.4385	19.3509	19.5192	19.4948
12	19.4689	19.5104	19.3922	19.3295	19.5082	19.4738
13	19.3785	19.4196	19.4783	19.4221	19.5356	19.5307
14	19.4626	19.4229	19.4338	19.451	19.4827	19.5156
15	19.4127	19.4502	19.4365	19.3556	19.4158	19.5362
16	19.3972	19.5037	19.4925	19.4203	19.4776	19.4244
17	19.4325	19.4571	19.3754	19.5044	19.546	19.5557
18	19.4078	19.4579	19.4107	19.3755	19.5422	19.5793
19	19.4404	19.4849	19.4586	19.3748	19.5156	19.5512
20	19.3807	19.4383	19.4828	19.4176	19.6338	19.4964
21	19.4311	19.3339	19.5636	19.3448	19.5521	19.6196
22	19.4276	19.4387	19.4409	19.4813	19.5788	19.6073
23	19.3493	19.4207	19.405	19.3185	19.6405	19.4687
24	19.4358	19.4158	19.402	19.3566	19.53	19.4828
25	19.4189	19.4506	19.4555	19.448	19.6097	19.4945
26	19.4402	19.5099	19.5159	19.4088	19.4565	19.4747
27	19.4799	19.4221	19.4321	19.3991	19.5382	19.4562
28	19.4302	19.465	19.556	19.4228	19.4813	19.5125
29	19.4529	19.4351	19.5043	19.4008	19.4092	19.5203
30	19.4044	19.4973	19.5336	19.4129	19.5232	19.4578
31	19.4255	19.4779	19.5247	19.3419	19.5405	19.4263
32	19.5319	19.4847	19.4919	19.3189	19.6716	19.4891
33	19.4415	19.5361	19.524	19.3273	19.5846	19.4644
34	19.4685	19.4976	19.5369	19.4196	19.5366	19.3486
35	19.4974	19.4908	19.5229	19.3709	19.4971	19.5113
36	19.4608	19.5042	19.5298	19.4031	19.453	19.472
37	19.4591	19.528	19.5979	19.3422	19.5947	19.4463
38	19.493	19.5476	19.6281	19.3693	19.5627	19.4716
39	19.5033	19.4963	19.5105	19.4539	19.6673	19.4508
40	19.4078	19.4527	19.4947	19.337	19.5935	19.4002
41	19.5065	19.4173	19.5303	19.3988	19.544	19.4125
42	19.4462	19.5308	19.5517	19.3124	19.5257	19.5305
43	19.4991	19.5023	19.5745	19.3428	19.5937	19.4695
44	19.5267	19.5167	19.527	19.4425	19.689	19.4294
45	19.4496	19.5131	19.5259	19.3586	19.6406	19.4904
46	19.4395	19.5259	19.55	19.4527	19.5798	19.5367
47	19.394	19.6516	19.6422	19.4003	19.6249	19.4898
48	19.5525	19.5344	19.5491	19.4901	19.5513	19.46
49	19.52	19.5096	19.655	19.4977	19.4758	19.4862
50	19.437	19.4789	19.6108	19.4577	19.5857	19.4282
51	19.4901	19.4729	19.5573	19.5278	19.5201	19.4894
52	19.5669	19.4818	19.5762	19.4868	19.5166	19.4896
53	19.5742	19.5228	19.5552	19.5371	19.5128	19.4402
54	19.5711	19.48	19.5342	19.5159	19.6008	19.5771
55	19.4871	19.4458	19.5364	19.5892	19.6265	19.4623
56	19.5531	19.5155	19.5556	19.482	19.5256	19.52
57	19.4483	19.4765	19.6184	19.5113	19.4936	19.4589
58	19.5133	19.4288	19.5827	19.4933	19.5321	19.4371
59	19.4843	19.476	19.5955	19.5098	19.5485	19.4383
60	19.3917	19.5087	19.5595	19.5443	19.5613	19.4821
61	19.4509	19.475	19.6293	19.6142	19.6592	19.4324
62	19.4518	19.4301	19.5815	19.4583	19.4915	19.5307
63	19.4373	19.4865	19.6142	19.5138	19.5368	19.4893
64	19.5096	19.4222	19.5477	19.4048	19.5221	19.5382
65	19.4581	19.3933	19.5627	19.4086	19.5279	19.5704
66	19.4349	19.4756	19.5283	19.5083	19.5146	19.4845
67	19.4592	19.4698	19.5379	19.4211	19.5685	19.4459
68	19.4143	19.4658	19.5749	19.4112	19.5958	19.4958
69	19.5162	19.4619	19.5621	19.4515	19.5306	19.4455
70	19.3949	19.4717	19.5359	19.3689	19.6216	19.5311
71	19.4305	19.4712	19.5824	19.4049	19.6428	19.5849
72	19.4233	19.4702	19.5631	19.3654	19.5462	19.5822
73	19.5038	19.4998	19.6177	19.4338	19.6128	19.6686
74	19.4623	19.4872	19.4941	19.4009	19.5255	19.604
75	19.3453	19.5356	19.5379	19.4035	19.5734	19.5085
76	19.4704	19.5196	19.4362	19.452	19.6315	19.5051
77	19.4473	19.4506	19.4088	19.4931	19.5031	19.533
78	19.3788	19.5135	19.4621	19.3934	19.5873	19.5771
79	19.3713	19.481	19.5086	19.3695	19.5783	19.5117
80	19.4775	19.4794	19.5082	19.4158	19.6727	19.4433
81	19.4291	19.5262	19.5275	19.4246	19.6399	19.4645
82	19.3963	19.493	19.5202	19.367	19.5641	19.5283
83	19.3614	19.547	19.523	19.3973	19.5571	19.4592
84	19.4296	19.473	19.5313	19.3737	19.5392	19.4418
85	19.4598	19.468	19.5277	19.3783	19.611	19.4552
86	19.465	19.4598	19.5831	19.3958	19.6156	19.3591
87	19.3987	19.5391	19.5953	19.444	19.7152	19.4193
88	19.4009	19.5074	19.5396	19.3919	19.597	19.4259
89	19.4428	19.5302	19.5552	19.4829	19.5988	19.447
90	19.3543	19.4848	19.5945	19.392	19.5579	19.447
91	19.4481	19.382	19.5415	19.4477	19.6528	19.51
92	19.3913	19.5014	19.5325	19.4854	19.6355	19.4796
93	19.4241	19.5107	19.5416	19.4283	19.5788	19.4741
94	19.4077	19.5345	19.5107	19.4362	19.5804	19.4625
95	19.3785	19.5237	19.5051	19.5084	19.5708	19.4629
96	19.4489	19.4944	19.566	19.5318	19.5624	19.4632
97	19.3329	19.469	19.536	19.4207	19.6149	19.4231
98	19.4543	19.4971	19.5138	19.4195	19.6338	19.4481
99	19.461	19.4578	19.4833	19.4836	19.6063	19.5462
100	19.5022	19.5422	19.5018	19.504	19.5133	19.5001
101	19.4233	19.5114	19.5721	19.4601	19.5235	19.5103
102	19.4018	19.5498	19.5424	19.4865	19.563	19.3555
103	19.5208	19.564	19.4651	19.4646	19.615	19.4291
104	19.4673	19.5808	19.5453	19.4652	19.5585	19.4281
105	19.398	19.503	19.4955	19.391	19.5856	19.4826
106	19.4827	19.5311	19.4985	19.4543	19.6178	19.4287
107	19.4684	19.5149	19.5531	19.4264	19.5962	19.4998
108	19.476	19.6006	19.5073	19.4567	19.5873	19.4801
109	19.4979	19.5814	19.5427	19.509	19.5834	19.5365
110	19.4499	19.5332	19.57	19.4674	19.5935	19.5478
111	19.3894	19.5219	19.4834	19.382	19.6095	19.3784
112	19.4739	19.5551	19.5259	19.4439	19.6167	19.4432
113	19.4673	19.5671	19.5226	19.4203	19.6058	19.4491
114	19.5022	19.5997	19.482	19.4271	19.7247	19.4959
115	19.5163	19.5172	19.5861	19.4367	19.6627	19.4327
116	19.5058	19.5104	19.5252	19.3884	19.6332	19.4762
117	19.5112	19.5281	19.4816	19.471	19.6377	19.4177
118	19.4941	19.5561	19.4825	19.4289	19.723	19.4436
119	19.503	19.5986	19.5279	19.4662	19.681	19.4333
120	19.5019	19.5338	19.4657	19.3944	19.7265	19.4463
121	19.4377	19.5701	19.4665	19.4273	19.6902	19.3528
122	19.4947	19.5038	19.5138	19.4135	19.6193	19.4336
123	19.514	19.5041	19.5568	19.3954	19.6729	19.4035
124	19.4725	19.5943	19.5189	19.4896	19.6099	19.3608
125	19.5075	19.5205	19.4988	19.4504	19.6879	19.4062
126	19.5417	19.6042	19.5627	19.3968	19.6684	19.3666
127	19.6013	19.5757	19.4984	19.4706	19.6364	19.4088
128	19.5339	19.5401	19.4692	19.3399	19.6227	19.4829
129	19.5662	19.5511	19.6158	19.4009	19.6312	19.393
130	19.3776	19.567	19.5244	19.3419	19.5583	19.3013
131	19.5743	19.5588	19.5463	19.4	19.5686	19.3915
132	19.4592	19.5258	19.538	19.4216	19.5444	19.349
133	19.3766	19.5781	19.5155	19.392	19.5913	19.4373
134	19.4721	19.551	19.5623	19.397	19.678	19.4068
135	19.4867	19.6598	19.5557	19.4095	19.5844	19.3339
136	19.4878	19.5472	19.4579	19.4014	19.6068	19.4781
137	19.4285	19.6036	19.5236	19.4201	19.4777	19.411
138	19.5279	19.5167	19.5293	19.4353	19.6333	19.3552
139	19.4479	19.5892	19.5902	19.458	19.4874	19.3885
140	19.4917	19.5794	19.5023	19.4248	19.5387	19.3801
141	19.5321	19.5733	19.5236	19.4255	19.5421	19.3615
142	19.5087	19.5344	19.5056	19.3595	19.5095	19.3321
143	19.5116	19.5908	19.5416	19.424	19.5144	19.4046
144	19.5266	19.5855	19.5347	19.3966	19.6287	19.3798
145	19.5094	19.5284	19.5665	19.4159	19.5465	19.4396
146	19.4983	19.5805	19.5347	19.5417	19.5926	19.3576
147	19.5197	19.568	19.6137	19.4377	19.5402	19.3732
148	19.4642	19.5375	19.6795	19.4255	19.5567	19.385
149	19.4734	19.5258	19.5345	19.4279	19.6403	19.3929
150	19.4601	19.5796	19.6053	19.5124	19.5949	19.4196
151	19.5308	19.5309	19.5773	19.4583	19.6494	19.3986
152	19.4608	19.521	19.5766	19.3507	19.5559	19.4016
153	19.481	19.5461	19.5464	19.3791	19.5418	19.4109
154	19.4836	19.5331	19.5538	19.4612	19.6576	19.3603
155	19.5926	19.5389	19.5392	19.4219	19.6457	19.4159
156	19.5038	19.5393	19.5548	19.3773	19.6467	19.4262
157	19.5052	19.5762	19.5945	19.365	19.6756	19.3527
158	19.5632	19.5229	19.5649	19.3538	19.632	19.482
159	19.5202	19.4873	19.5297	19.4039	19.5483	19.526
160	19.5217	19.5205	19.6788	19.3793	19.6304	19.4365
161	19.4961	19.5368	19.6531	19.4702	19.6178	19.3695
162	19.4353	19.5472	19.6286	19.4157	19.6157	19.4212
163	19.4276	19.519	19.6705	19.5062	19.6333	19.5016
164	19.4866	19.5084	19.6035	19.4249	19.7023	19.4743
165	19.4244	19.5797	19.616	19.3955	19.6737	19.412
166	19.4618	19.4865	19.5816	19.3707	19.7134	19.3326
167	19.4503	19.5218	19.669	19.4456	19.6824	19.469
168	19.4968	19.536	19.6454	19.4427	19.7071	19.4098
169	19.5039	19.4749	19.6985	19.4299	19.7535	19.3761
170	19.5156	19.5601	19.5609	19.4583	19.6789	19.4417
171	19.5528	19.6045	19.5949	19.4157	19.6952	19.4843
172	19.5263	19.5491	19.591	19.4215	19.7714	19.4004
173	19.5106	19.6059	19.5315	19.3624	19.7418	19.3858
174	19.571	19.5918	19.6935	19.4117	19.7858	19.4808
175	19.5129	19.5637	19.6516	19.5128	19.6394	19.521
176	19.5318	19.578	19.5741	19.4898	19.6922	19.4719
177	19.439	19.6349	19.5573	19.4416	19.7979	19.4351
178	19.5208	19.5935	19.5704	19.4995	19.7399	19.4335
179	19.4318	19.6036	19.6062	19.4627	19.6846	19.4004
180	19.4778	19.6421	19.6421	19.3482	19.7305	19.3387
181	19.4015	19.574	19.6308	19.3574	19.7479	19.394
182	19.3934	19.6359	19.5185	19.402	19.7189	19.4226
183	19.4274	19.6355	19.6317	19.4588	19.786	19.3664
184	19.4334	19.6817	19.6129	19.4791	19.7325	19.4301
185	19.4574	19.5734	19.6891	19.595	19.6847	19.432
186	19.4307	19.5663	19.5874	19.4522	19.743	19.4491
187	19.4553	19.5997	19.6694	19.4023	19.7214	19.5104
188	19.4515	19.7672	19.6616	19.3324	19.6815	19.418
189	19.5226	19.59	19.6033	19.3799	19.7201	19.4149
190	19.4474	19.6574	19.6111	19.3623	19.6695	19.4694
191	19.4005	19.6327	19.6337	19.402	19.6639	19.4604
192	19.496	19.5983	19.5505	19.3918	19.6083	19.4467
193	19.4311	19.6244	19.5479	19.3833	19.4774	19.4166
194	19.4182	19.519	19.6738	19.4179	19.5402	19.4688
195	19.4078	19.5835	19.6561	19.4537	19.6555	19.3895
196	19.4746	19.6187	19.5843	19.458	19.6881	19.425
197	19.5375	19.6443	19.5584	19.425	19.6367	19.4586
198	19.4006	19.6625	19.6616	19.402	19.6608	19.5045
199	19.4566	19.5484	19.514	19.4813	19.6152	19.4396
200	19.471	19.5138	19.6038	19.3867	19.5591	19.5386
201	19.4368	19.5766	19.593	19.4604	19.656	19.5234
202	19.4115	19.579	19.567	19.5525	19.6612	19.4432
203	19.4557	19.479	19.6359	19.3334	19.6772	19.465
204	19.4361	19.515	19.6889	19.5218	19.6542	19.4862
205	19.5035	19.5515	19.6425	19.4518	19.6803	19.4171
206	19.4342	19.4794	19.5744	19.4322	19.6625	19.4578
207	19.4806	19.524	19.6455	19.4316	19.6741	19.3978
208	19.4886	19.512	19.6901	19.4392	19.616	19.5153
209	19.5258	19.5256	19.6323	19.3824	19.7185	19.5013
210	19.5026	19.5507	19.6229	19.4391	19.6304	19.5153
211	19.581	19.4923	19.5281	19.409	19.5962	19.5968
212	19.5047	19.5574	19.5532	19.4635	19.6432	19.5399
213	19.523	19.49	19.6429	19.5143	19.6696	19.5281
214	19.5096	19.5145	19.4892	19.546	19.6748	19.5417
215	19.5004	19.4907	19.4728	19.4485	19.6405	19.4488
216	19.5469	19.4628	19.4999	19.4451	19.6308	19.5088
217	19.5234	19.4871	19.5752	19.5278	19.7035	19.4802
218	19.5735	19.4544	19.5782	19.4938	19.6875	19.5328
219	19.562	19.4589	19.4519	19.5109	19.6249	19.5124
220	19.5921	19.5024	19.4943	19.4994	19.7414	19.5583
221	19.5475	19.5148	19.5695	19.475	19.6597	19.5879
222	19.4687	19.4948	19.4874	19.4344	19.6084	19.6169
223	19.5234	19.5664	19.5133	19.51	19.563	19.5636
224	19.4873	19.508	19.6078	19.4419	19.6707	19.6915
225	19.607	19.4826	19.5099	19.4537	19.6354	19.5126
226	19.5071	19.4584	19.4827	19.4503	19.6994	19.5947
227	19.5025	19.5216	19.488	19.5161	19.6328	19.4916
228	19.5068	19.4734	19.519	19.4721	19.6452	19.5578
229	19.4658	19.5329	19.5077	19.3435	19.7132	19.4296
230	19.5317	19.4987	19.5066	19.4841	19.7468	19.6334
231	19.4731	19.5033	19.6123	19.5016	19.7597	19.5097
232	19.5962	19.4848	19.6017	19.4729	19.6986	19.5728
233	19.5828	19.4361	19.5865	19.44	19.7022	19.5305
234	19.5053	19.4739	19.5466	19.4279	19.6763	19.5808
235	19.5744	19.6153	19.5436	19.4048	19.7116	19.5573
236	19.4805	19.5754	19.534	19.4279	19.739	19.5985
237	19.5814	19.4382	19.5838	19.3953	19.6717	19.6069
238	19.535	19.5181	19.547	19.4381	19.6696	19.6028
239	19.4893	19.5229	19.464	19.5081	19.6263	19.5206
240	19.4866	19.4789	19.5057	19.4451	19.614	19.5652
241	19.4931	19.511	19.5282	19.4874	19.6878	19.5158
242	19.464	19.5061	19.4724	19.4791	19.7405	19.4563
243	19.502	19.5171	19.5863	19.4746	19.7435	19.6298
244	19.5048	19.6792	19.5436	19.4482	19.7276	19.5864
245	19.5658	19.5557	19.5036	19.4099	19.6326	19.6646
246	19.4349	19.5016	19.5047	19.4782	19.6155	19.564
247	19.447	19.4154	19.5195	19.4713	19.6199	19.4917
248	19.5362	19.4533	19.5275	19.3999	19.6519	19.5823
249	19.4888	19.5119	19.4898	19.4414	19.6984	19.5492
250	19.4609	19.5329	19.5381	19.4535	19.6818	19.4594
251	19.5051	19.5436	19.4816	19.4698	19.6496	19.5034
252	19.5032	19.4563	19.4884	19.4709	19.7252	19.5466
253	19.4796	19.4785	19.5257	19.3994	19.6896	19.5131
254	19.4051	19.4699	19.434	19.4015	19.6192	19.5372
255	19.5038	19.5037	19.5499	19.4876	19.6984	19.5372
256	19.4737	19.4081	19.4865	19.414	19.6604	19.4321
257	19.5387	19.4616	19.4941	19.3762	19.7019	19.4944
258	19.4737	19.5475	19.5176	19.4205	19.6571	19.4529
259	19.4881	19.5028	19.5596	19.4277	19.6621	19.4843
260	19.4318	19.5505	19.4625	19.4474	19.6364	19.412
261	19.463	19.5411	19.561	19.4301	19.6515	19.5937
262	19.4876	19.5222	19.5808	19.3265	19.6576	19.5107
263	19.5444	19.5259	19.4983	19.3755	19.5724	19.5222
264	19.61	19.4857	19.5429	19.4045	19.6445	19.5831
265	19.4778	19.5224	19.5101	19.3889	19.6467	19.4705
266	19.495	19.4781	19.5224	19.4581	19.6134	19.4974
267	19.4307	19.487	19.4964	19.4437	19.6851	19.5618
268	19.4803	19.5367	19.5901	19.4118	19.7447	19.4537
269	19.4548	19.4205	19.5496	19.4237	19.6236	19.5563
270	19.4461	19.5307	19.5311	19.3619	19.7041	19.5676
271	19.4906	19.4701	19.469	19.4018	19.6769	19.5557
272	19.4039	19.4618	19.535	19.2747	19.6103	19.515
273	19.5018	19.4905	19.5053	19.3825	19.6234	19.4974
274	19.4616	19.4519	19.539	19.4084	19.5237	19.626
275	19.4241	19.4467	19.571	19.4192	19.5785	19.5559
276	19.4575	19.4785	19.5986	19.3901	19.6441	19.505
277	19.4695	19.4774	19.4218	19.4983	19.6089	19.5531
278	19.441	19.445	19.4506	19.4106	19.5909	19.5377
279	19.4448	19.4175	19.4764	19.4204	19.6698	19.5276
280	19.4272	19.4439	19.4836	19.4292	19.5816	19.5186
281	19.4441	19.4428	19.501	19.3908	19.6326	19.5733
282	19.4593	19.4646	19.4863	19.4356	19.6264	19.6062
283	19.4841	19.4732	19.4711	19.4827	19.621	19.5061
284	19.4967	19.4732	19.5	19.3952	19.5817	19.5175
285	19.4869	19.4391	19.5103	19.3904	19.6134	19.497
286	19.4414	19.4808	19.5481	19.3723	19.5711	19.4741
287	19.4314	19.4729	19.5598	19.465	19.6833	19.5829
288	19.4574	19.466	19.5397	19.4662	19.6318	19.5619
289	19.4701	19.4417	19.5274	19.4002	19.6181	19.5127
290	19.4512	19.5544	19.4668	19.4313	19.5424	19.6213
291	19.4047	19.511	19.5177	19.4375	19.6598	19.5115
292	19.4634	19.5067	19.4894	19.4261	19.6256	19.6492
293	19.4786	19.4834	19.4632	19.5251	19.5832	19.5784
294	19.4793	19.4815	19.5298	19.4395	19.6302	19.5421
295	19.4536	19.4621	19.4659	19.4389	19.7044	19.6013
296	19.4488	19.4975	19.4729	19.4367	19.7046	19.5295
297	19.454	19.6057	19.5219	19.3813	19.6315	19.6159
298	19.4066	19.4794	19.6091	19.4841	19.6057	19.5727
299	19.4184	19.5464	19.6196	19.5242	19.65	19.6427
300	19.4791	19.4345	19.5284	19.4689	19.5944	19.6054
301	19.4488	19.4849	19.6199	19.4044	19.5495	19.6123
302	19.4803	19.5622	19.6104	19.4435	19.5423	19.5886
303	19.524	19.6022	19.5782	19.4977	19.6024	19.4786
304	19.5493	19.4983	19.6341	19.3941	19.6585	19.4553
305	19.4185	19.4561	19.5302	19.3967	19.6561	19.4098
306	19.5316	19.4466	19.5341	19.4959	19.6726	19.4425
307	19.461	19.4749	19.516	19.4799	19.6492	19.4663
308	19.4328	19.4501	19.5296	19.4093	19.6954	19.4467
309	19.5052	19.525	19.6215	19.451	19.6178	19.4855
310	19.5047	19.4688	19.5644	19.3832	19.5836	19.5497
311	19.4786	19.4912	19.5701	19.4253	19.6368	19.4955
312	19.5402	19.4222	19.6296	19.3794	19.6742	19.4687
313	19.4671	19.4702	19.5196	19.4368	19.6874	19.5012
314	19.4813	19.4464	19.5524	19.3899	19.7241	19.4795
315	19.5141	19.5406	19.5695	19.4099	19.6861	19.5059
316	19.5227	19.5079	19.5841	19.4239	19.6827	19.5209
317	19.4972	19.4768	19.5748	19.4145	19.6834	19.5456
318	19.4549	19.4672	19.5381	19.4197	19.7431	19.5058
319	19.4638	19.5049	19.5321	19.4311	19.7006	19.5255
320	19.466	19.5624	19.5287	19.4251	19.7206	19.5028
321	19.4215	19.5223	19.5065	19.3609	19.6524	19.4842
322	19.4848	19.559	19.4776	19.4294	19.6675	19.4907
323	19.5041	19.5619	19.4801	19.3869	19.6412	19.5207
324	19.4728	19.5608	19.5224	19.4423	19.5764	19.4515
325	19.4717	19.4965	19.4411	19.4095	19.7141	19.5016
326	19.5718	19.6103	19.5239	19.5525	19.6505	19.4788
327	19.4707	19.5021	19.4704	19.4649	19.6236	19.481
328	19.4301	19.5303	19.4978	19.4809	19.6388	19.5076
329	19.4491	19.5082	19.4336	19.4103	19.6694	19.5367
330	19.5905	19.5049	19.4983	19.4255	19.5923	19.4843
331	19.5259	19.5106	19.4925	19.4439	19.6848	19.5023
332	19.447	19.5218	19.5035	19.4468	19.5419	19.5284
333	19.5523	19.5536	19.5073	19.416	19.6368	19.4845
334	19.504	19.4997	19.4425	19.4474	19.6535	19.4552
335	19.58	19.5314	19.4295	19.4204	19.6352	19.4876
336	19.5339	19.5152	19.501	19.3969	19.6626	19.4447
337	19.4782	19.5127	19.4761	19.4601	19.6434	19.4925
338	19.5179	19.5177	19.4542	19.5359	19.6024	19.3972
339	19.4478	19.5363	19.4768	19.4297	19.6636	19.4327
340	19.4982	19.611	19.5714	19.3546	19.5991	19.4213
341	19.5356	19.5463	19.4702	19.4568	19.7065	19.4191
342	19.5769	19.5129	19.534	19.3878	19.6475	19.4114
343	19.4947	19.569	19.4745	19.4433	19.612	19.4935
344	19.4417	19.5723	19.5833	19.4525	19.5889	19.5337
345	19.4644	19.5122	19.6123	19.4281	19.6531	19.4237
346	19.5665	19.5459	19.5055	19.4781	19.6534	19.5091
347	19.5501	19.6023	19.522	19.5033	19.6011	19.4761
348	19.5005	19.5422	19.5188	19.4865	19.6206	19.5042
349	19.5949	19.6269	19.4849	19.5155	19.6559	19.562
350	19.5481	19.5385	19.5812	19.443	19.5776	19.4914
351	19.5549	19.5547	19.5522	19.4835	19.6961	19.5285
352	19.5637	19.64	19.527	19.459	19.682	19.5181
353	19.5052	19.5935	19.5152	19.4742	19.5609	19.4981
354	19.4651	19.5795	19.5218	19.5143	19.6242	19.5347
355	19.5076	19.582	19.5171	19.5145	19.5955	19.5087
356	19.5096	19.5852	19.5267	19.6056	19.5944	19.4547
357	19.4801	19.5489	19.5269	19.5	19.5994	19.4742
358	19.5296	19.5644	19.4673	19.5219	19.6589	19.4151
359	19.515	19.5317	19.5172	19.542	19.6191	19.4961
360	19.5657	19.5593	19.5517	19.5843	19.6609	19.5192
361	19.5397	19.4925	19.4139	19.5332	19.6161	19.5697
362	19.4777	19.5715	19.4433	19.4853	19.5095	19.5865
363	19.5032	19.5676	19.4976	19.5268	19.5894	19.514
364	19.4934	19.5265	19.5537	19.4723	19.6574	19.5
365	19.6332	19.5716	19.456	19.3801	19.6213	19.4949
366	19.5189	19.5115	19.492	19.4802	19.5858	19.4982
367	19.4183	19.5918	19.5023	19.5206	19.6467	19.4976
368	19.5813	19.5615	19.5088	19.5029	19.602	19.5421
369	19.4239	19.5936	19.4904	19.5154	19.6424	19.5381
370	19.4913	19.6272	19.4941	19.4592	19.6653	19.5141
371	19.5148	19.5477	19.4767	19.4202	19.6457	19.4924
372	19.5735	19.5963	19.4269	19.4404	19.6144	19.4571
373	19.5179	19.6253	19.5196	19.5231	19.5714	19.4823
374	19.4853	19.6575	19.4846	19.3898	19.5993	19.5186
375	19.5164	19.5513	19.4873	19.4753	19.67	19.4723
376	19.5696	19.6176	19.5188	19.4465	19.5909	19.4846
377	19.5727	19.5078	19.4856	19.4775	19.7399	19.513
378	19.6006	19.4987	19.5117	19.5529	19.6247	19.4899
379	19.5549	19.5663	19.4537	19.4855	19.6435	19.4195
380	19.5222	19.5749	19.5697	19.496	19.5992	19.4572
381	19.5369	19.4956	19.6124	19.506	19.6783	19.5251
382	19.5564	19.5242	19.5136	19.5261	19.5524	19.4835
383	19.5538	19.5612	19.5448	19.4793	19.6176	19.5481
384	19.5269	19.5236	19.4983	19.4685	19.5992	19.4741
385	19.5494	19.6714	19.5218	19.5178	19.5579	19.4886
386	19.6097	19.5506	19.5284	19.4365	19.5191	19.4861
387	19.6148	19.4594	19.5302	19.4611	19.6136	19.5538
388	19.5295	19.4957	19.6259	19.4987	19.5553	19.5465
389	19.5134	19.5661	19.5431	19.4567	19.5329	19.4833
390	19.5749	19.5507	19.5701	19.4161	19.5549	19.4761
391	19.4375	19.5176	19.466	19.4702	19.621	19.4877
392	19.5372	19.5522	19.5565	19.4571	19.6269	19.5136
393	19.5494	19.5628	19.5883	19.4103	19.5091	19.5169
394	19.5883	19.5746	19.5578	19.4216	19.5709	19.392
395	19.4619	19.4781	19.5968	19.4435	19.607	19.5084
396	19.4457	19.5135	19.4922	19.4406	19.6599	19.4176
397	19.4725	19.6063	19.5216	19.4489	19.6746	19.4477
398	19.5373	19.5028	19.5259	19.4201	19.6267	19.4453
399	19.5037	19.6176	19.5768	19.5059	19.6306	19.512
400	19.5514	19.5382	19.4915	19.5238	19.5949	19.4694
401	19.5096	19.5419	19.4787	19.4148	19.6102	19.3966
402	19.513	19.4907	19.441	19.4657	19.7212	19.5716
403	19.4754	19.5351	19.5509	19.4641	19.7018	19.4292
404	19.4509	19.5333	19.5964	19.5393	19.7127	19.4449
405	19.5319	19.5342	19.5179	19.5243	19.5667	19.431
406	19.5582	19.4892	19.4432	19.4725	19.4837	19.4831
407	19.4809	19.5341	19.5159	19.4595	19.5957	19.4538
408	19.5268	19.4768	19.5162	19.586	19.6238	19.4415
409	19.5381	19.4476	19.4928	19.528	19.6093	19.4031
410	19.519	19.4393	19.5077	19.4442	19.6689	19.4562
411	19.5025	19.556	19.5091	19.4289	19.711	19.4641
412	19.4926	19.5364	19.558	19.4663	19.6121	19.4088
413	19.4728	19.5666	19.544	19.4652	19.6625	19.4486
414	19.5082	19.534	19.4971	19.38	19.508	19.4527
415	19.4192	19.5386	19.5622	19.4517	19.5679	19.4125
416	19.484	19.6403	19.5604	19.42	19.5927	19.4258
417	19.4784	19.5349	19.5792	19.4454	19.6882	19.5077
418	19.5136	19.5518	19.4792	19.3809	19.6307	19.4567
419	19.5747	19.4706	19.4523	19.3831	19.6529	19.4289
420	19.5335	19.529	19.5495	19.4273	19.6086	19.4639
421	19.5089	19.5829	19.4616	19.4292	19.5324	19.4864
422	19.4886	19.5254	19.5268	19.4321	19.5981	19.4086
423	19.4762	19.5833	19.3965	19.464	19.5942	19.4743
424	19.452	19.6302	19.4925	19.4346	19.6567	19.5104
425	19.5375	19.6407	19.5322	19.4664	19.5983	19.4622
426	19.5117	19.5098	19.4961	19.4426	19.71	19.3959
427	19.4737	19.5474	19.4825	19.4583	19.6808	19.4504
428	19.551	19.583	19.4401	19.4196	19.7034	19.4295
429	19.4582	19.623	19.5019	19.4451	19.6815	19.5201
430	19.5207	19.5814	19.4903	19.33	19.6766	19.4756
431	19.4954	19.572	19.4607	19.4523	19.6462	19.5113
432	19.4956	19.5418	19.4451	19.5207	19.6694	19.5062
433	19.5033	19.4777	19.5299	19.4489	19.6393	19.5143
434	19.4181	19.4712	19.5191	19.4683	19.6699	19.4156
435	19.5341	19.5647	19.532	19.5258	19.6421	19.4526
436	19.5052	19.5355	19.5328	19.3983	19.6349	19.4766
437	19.5302	19.5664	19.5127	19.355	19.658	19.4179
438	19.4526	19.6288	19.5636	19.4289	19.5622	19.445
439	19.5177	19.5557	19.5432	19.4129	19.5645	19.5138
440	19.5275	19.6482	19.6444	19.3163	19.6026	19.4972
441	19.5175	19.5771	19.5119	19.3992	19.5798	19.4983
442	19.5028	19.5301	19.5768	19.3951	19.663	19.4651
443	19.4973	19.6194	19.545	19.3569	19.5374	19.5038
444	19.526	19.5441	19.6502	19.3742	19.5758	19.5456
445	19.4969	19.6275	19.561	19.342	19.5656	19.4663
446	19.4978	19.5324	19.56	19.4432	19.5638	19.4355
447	19.4459	19.597	19.6044	19.4133	19.6524	19.4898
448	19.4867	19.5652	19.5655	19.4638	19.5921	19.526
449	19.4461	19.6512	19.5077	19.5015	19.6164	19.4967
450	19.5049	19.5382	19.4915	19.5238	19.5949	19.4186
451	19.4517	19.5419	19.4787	19.4148	19.6102	19.4674
452	19.4104	19.4907	19.441	19.4657	19.7212	19.4742
453	19.4043	19.5351	19.5509	19.4641	19.7018	19.5049
454	19.4948	19.5333	19.5964	19.5393	19.7127	19.5046
455	19.4326	19.5342	19.5179	19.5243	19.5667	19.4327
456	19.4619	19.4892	19.4432	19.4725	19.4837	19.4912
457	19.4963	19.5341	19.5159	19.4595	19.5957	19.4576
458	19.4076	19.4768	19.5162	19.586	19.6238	19.4473
459	19.5079	19.4476	19.4928	19.528	19.6093	19.4501
460	19.5625	19.4393	19.5077	19.4442	19.6689	19.5003
461	19.4912	19.556	19.5091	19.4289	19.711	19.4682
462	19.5011	19.5364	19.558	19.4663	19.6121	19.4855
463	19.4776	19.5666	19.544	19.4652	19.6625	19.4549
464	19.5888	19.534	19.4971	19.38	19.508	19.4241
465	19.5004	19.5386	19.5622	19.4517	19.5679	19.5315
466	19.5026	19.6403	19.5604	19.42	19.5927	19.4734
467	19.4972	19.5349	19.5792	19.4454	19.6882	19.5212
468	19.5785	19.5518	19.4792	19.3809	19.6307	19.5063
469	19.4536	19.4706	19.4523	19.3831	19.6529	19.5099
470	19.5255	19.529	19.5495	19.4273	19.6086	19.451
471	19.4475	19.5829	19.4616	19.4292	19.5324	19.4748
472	19.5531	19.5254	19.5268	19.4321	19.5981	19.472
473	19.527	19.5833	19.3965	19.464	19.5942	19.5279
474	19.4653	19.6302	19.4925	19.4346	19.6567	19.4249
475	19.4306	19.6407	19.5322	19.4664	19.5983	19.5204
476	19.5124	19.5098	19.4961	19.4426	19.71	19.4395
477	19.4672	19.5474	19.4825	19.4583	19.6808	19.5247
478	19.496	19.583	19.4401	19.4196	19.7034	19.5759
479	19.4229	19.623	19.5019	19.4451	19.6815	19.5264
480	19.4838	19.5814	19.4903	19.33	19.6766	19.6376
481	19.502	19.572	19.4607	19.4523	19.6462	19.5898
482	19.5401	19.5418	19.4451	19.5207	19.6694	19.5278
483	19.5639	19.4777	19.5299	19.4489	19.6393	19.4218
484	19.521	19.4712	19.5191	19.4683	19.6699	19.4321
485	19.5431	19.5647	19.532	19.5258	19.6421	19.4189
486	19.4875	19.5355	19.5328	19.3983	19.6349	19.4683
487	19.4974	19.5664	19.5127	19.355	19.658	19.448
488	19.5695	19.6288	19.5636	19.4289	19.5622	19.5364
489	19.5212	19.5557	19.5432	19.4129	19.5645	19.545
490	19.5928	19.6482	19.6444	19.3163	19.6026	19.5797
491	19.5671	19.5771	19.5119	19.3992	19.5798	19.5679
492	19.5285	19.5301	19.5768	19.3951	19.663	19.503
493	19.4927	19.6194	19.545	19.3569	19.5374	19.5295
494	19.5601	19.5441	19.6502	19.3742	19.5758	19.4535
495	19.5815	19.6275	19.561	19.342	19.5656	19.5815
496	19.5328	19.5324	19.56	19.4432	19.5638	19.5535
497	19.5784	19.597	19.6044	19.4133	19.6524	19.464
498	19.4994	19.5652	19.5655	19.4638	19.5921	19.4615
499	19.5902	19.6512	19.5077	19.5015	19.6164	19.4938
Average RG	19.485	19.5265	19.5317	19.4376	19.6197	19.4844
