# Supplementary material for: Identification of Potential Druggable Targets and Structure-Based Virtual Screening for Drug-like Molecules against the Shrimp Pathogen Enterocytozoon hepatopenaei
Source: Int J Mol Sci. 2023 Jan 11;24(2):1412. doi: 10.3390/ijms24021412 (PMC9867128; doi:10.3390/ijms24021412)
Supplement: Supplementary file 1 [file ijms-24-01412-s001.zip › Table S7.xlsx]

## Sheet: Aquaporin
	Table S7. RMSF values of the protein–ligand complexes and proteins following 100 ns MD simulations.
	CHEMBL3703838	ZINC000002243083	CHEMBL133039	CHEMBL3140193	CHEMBL2132563	Aquaporin
0	5.37402	4.52746	7.08548	5.11906	6.60786	1
1	3.47786	3.09331	5.02491	3.77729	4.61876	4.14392
2	2.42471	2.00343	3.63253	2.37727	2.7748	2.94956
3	1.96914	1.53295	2.34665	1.95313	2.20712	2.00763
4	1.73027	1.31302	1.90038	1.67854	1.90063	1.76885
5	1.49466	1.13413	1.29699	1.52499	1.67937	1.58504
6	1.34545	0.98915	1.46932	1.35302	1.55156	1.36626
7	1.28549	0.875827	1.80052	1.20233	1.39637	1.19595
8	1.13695	0.760216	1.66999	1.09124	1.21444	1.05936
9	0.950465	0.656716	1.09274	0.96342	1.12639	0.891956
10	0.867023	0.534311	0.793718	0.783994	1.00481	0.793806
11	0.850368	0.526129	0.744701	0.795498	0.894169	0.676259
12	0.789961	0.501579	0.725267	0.745258	0.880418	0.630501
13	0.696261	0.444353	0.68119	0.622135	0.833601	0.580973
14	0.587036	0.379507	0.570596	0.525681	0.688192	0.525568
15	0.548453	0.382853	0.539064	0.480728	0.643834	0.435136
16	0.612555	0.43388	0.6006	0.518795	0.748261	0.434867
17	0.602851	0.414449	0.589972	0.513052	0.699187	0.478431
18	0.480918	0.364583	0.479735	0.426662	0.593223	0.459214
19	0.513594	0.403474	0.499358	0.442541	0.638313	0.378463
20	0.595467	0.419479	0.545535	0.503763	0.693414	0.407924
21	0.56045	0.44783	0.516764	0.473291	0.645369	0.454768
22	0.506487	0.44766	0.475271	0.465287	0.562677	0.446004
23	0.559158	0.424339	0.543433	0.498373	0.634197	0.411896
24	0.632551	0.485776	0.673235	0.553225	0.697387	0.428281
25	0.521386	0.457987	0.575555	0.569951	0.618459	0.467527
26	0.467256	0.412217	0.445993	0.550721	0.559126	0.409624
27	0.564026	0.469134	0.556045	0.627643	0.691596	0.393386
28	0.656479	0.517203	0.643457	0.663903	0.757843	0.474518
29	0.64031	0.528643	0.648965	0.700445	0.82024	0.520148
30	0.684968	0.59322	0.671548	0.807287	0.895437	0.566931
31	0.800531	0.66832	0.822457	0.883088	1.02551	0.649312
32	1.11531	0.822634	0.886767	0.937161	1.15983	0.787865
33	1.51585	0.99336	1.04131	1.11765	1.62511	0.882269
34	1.69363	1.16136	1.2618	1.25021	1.76603	1.1286
35	2.43841	1.77332	1.89304	1.88412	2.34346	1.32549
36	2.69616	1.69471	2.02947	2.10944	2.28726	1.82332
37	2.41147	1.58526	2.1318	2.00644	1.92107	1.76477
38	2.24031	1.77117	2.31872	1.90429	1.97815	1.93754
39	1.96216	1.27459	1.53889	1.44455	1.37186	2.18178
40	1.65527	1.20195	1.46908	1.41932	1.3903	1.2998
41	1.26997	1.13053	1.35944	1.35404	1.23004	1.2766
42	1.69973	0.867779	1.32071	1.14116	1.24668	1.11791
43	1.72714	0.700115	1.03139	0.945847	1.10425	0.888054
44	0.954029	0.562703	0.702399	0.691896	0.904249	0.693769
45	1.03325	0.738447	0.833453	0.794324	1.09652	0.551889
46	1.34623	0.706238	0.85241	0.82265	1.09924	0.596773
47	1.1241	0.622625	0.75439	0.704695	0.918553	0.59033
48	0.872607	0.617737	0.724608	0.717028	1.02291	0.511628
49	0.962644	0.679943	0.767931	0.735001	1.12724	0.49585
50	1.36725	0.721763	0.830971	0.742974	1.05061	0.594201
51	1.31501	0.774587	0.892708	0.693594	1.01265	0.616843
52	0.913088	0.791393	0.904403	0.747897	1.16093	0.607579
53	1.04164	0.693062	0.82784	0.664274	1.04369	0.687488
54	1.24558	0.706992	0.874131	0.711925	0.98956	0.64101
55	0.845259	0.556165	0.814181	0.703777	0.931504	0.680201
56	0.963775	0.626219	0.916518	0.799669	1.3777	0.587219
57	1.35672	0.757188	1.11832	0.950686	1.70315	0.636673
58	1.17979	0.666608	1.02418	1.00445	1.49122	0.773986
59	0.912284	0.53794	0.85078	0.778871	1.35017	0.691519
60	1.25553	0.77736	1.1305	1.00471	1.8473	0.623976
61	1.30627	0.829939	1.16207	1.14274	1.40809	1.15225
62	1.08034	0.657451	0.906947	1.04042	1.24429	1.20014
63	0.83356	0.553449	0.771382	0.813338	1.05612	0.908136
64	0.877068	0.582296	0.795567	0.864366	0.950348	0.633224
65	0.752732	0.495061	0.699243	0.728375	0.791955	0.657958
66	0.687223	0.448925	0.585053	0.651347	0.706534	0.542503
67	0.558288	0.404245	0.499356	0.513565	0.602904	0.482637
68	0.547131	0.394171	0.473723	0.593398	0.575377	0.457015
69	0.628865	0.429437	0.525676	0.772656	0.582862	0.470466
70	0.701398	0.455539	0.598883	0.859918	0.670709	0.490975
71	0.750004	0.419749	0.586125	0.767996	0.700188	0.504837
72	0.804722	0.422704	0.595615	0.832336	0.673493	0.450869
73	0.939038	0.462448	0.618449	0.990997	0.697694	0.470767
74	1.04246	0.491792	0.714026	1.00737	0.830278	0.516868
75	1.06023	0.506183	0.724962	1.03046	0.872831	0.547708
76	1.17382	0.561662	0.746097	1.21568	0.891174	0.5537
77	1.34729	0.609175	0.841444	1.32602	1.01748	0.641991
78	1.43606	0.640955	0.930848	1.28541	1.13631	0.727729
79	1.44095	0.741953	1.0514	1.47836	1.25678	0.738388
80	1.28814	0.679056	1.01798	1.3486	1.14082	0.828433
81	1.21304	0.736931	1.00238	1.38868	1.16086	0.782482
82	1.61921	1.01283	1.20853	1.69468	1.58494	0.82986
83	1.48444	0.952543	1.07297	1.61789	1.42361	1.13611
84	1.47758	0.904034	0.980714	1.49721	1.43755	1.05039
85	1.24387	0.750936	0.868186	1.266	1.05102	1.03861
86	1.06214	0.605736	0.740526	1.14614	0.858717	0.829071
87	1.03401	0.615975	0.711906	1.08867	0.818793	0.672516
88	0.948841	0.5718	0.660738	0.87403	0.737135	0.663776
89	0.753042	0.467749	0.577746	0.761355	0.666465	0.594746
90	0.709952	0.462493	0.545664	0.788363	0.606347	0.490993
91	0.781889	0.539766	0.58643	0.742738	0.635697	0.502982
92	0.648119	0.47425	0.544865	0.602583	0.616387	0.568536
93	0.52389	0.390563	0.481313	0.54319	0.538653	0.486703
94	0.581104	0.440511	0.495547	0.645547	0.530887	0.407472
95	0.627889	0.504613	0.561254	0.673442	0.595767	0.464472
96	0.521672	0.436491	0.521068	0.52768	0.569694	0.498841
97	0.486032	0.413261	0.443887	0.525526	0.509434	0.439889
98	0.635009	0.454498	0.521019	0.63519	0.614641	0.407462
99	0.650674	0.434151	0.557057	0.59735	0.683629	0.503725
100	0.583056	0.429913	0.515575	0.538925	0.622119	0.512375
101	0.703563	0.45903	0.548217	0.653301	0.651657	0.44459
102	0.843713	0.594459	0.717814	0.776551	0.873529	0.486769
103	0.814169	0.585304	0.703626	0.758247	0.85178	0.651291
104	0.82778	0.593655	0.697456	0.798986	0.900876	0.622307
105	1.08553	0.949276	0.916329	1.03976	1.09331	0.611274
106	1.37784	1.29188	1.16085	1.28545	1.42616	0.91699
107	1.30504	1.13596	1.16329	1.20553	1.41721	1.09123
108	1.2908	0.965918	1.14289	1.28083	1.48614	0.983077
109	1.85656	1.27696	1.49396	1.64903	2.04296	1.08866
110	1.50039	1.16425	1.41375	1.4091	1.59034	1.59812
111	1.30456	1.27637	1.47667	1.43316	1.50661	1.21173
112	1.06923	1.0477	1.28003	1.26225	1.3113	1.26367
113	1.12089	1.12222	1.3301	1.29459	1.43482	1.08607
114	1.12616	1.06148	1.23011	1.28615	1.44182	1.02188
115	0.877607	0.798306	0.918144	1.01776	1.07136	0.961793
116	0.850744	0.777151	0.932999	0.976213	1.0028	0.805531
117	0.96396	0.841021	0.941034	1.16169	1.27174	0.78124
118	0.820191	0.678686	0.713375	1.09551	1.10036	0.753098
119	0.680293	0.643358	0.682988	0.974315	0.840145	0.701493
120	0.751813	0.863231	0.812911	1.11391	0.945155	0.684539
121	0.737638	1.18797	0.8651	1.37467	0.959342	0.712291
122	0.936153	1.08207	0.834203	1.55325	1.14967	0.93422
123	1.12704	0.863802	1.00805	1.69133	1.39541	1.0176
124	1.5378	0.929189	1.06827	1.55111	1.65827	0.970265
125	2.06293	1.21726	1.21934	2.27399	2.16122	1.05217
126	2.52948	1.9746	1.48134	3.15957	2.97299	1.55764
127	2.76046	1.66665	1.53181	3.30111	2.48241	1.90993
128	2.11748	1.29447	1.2283	2.31584	2.51517	2.04143
129	2.08927	1.53331	1.2788	2.01563	2.6327	1.48544
130	2.30549	1.50036	1.23513	2.14619	3.67434	1.45614
131	1.3472	1.35112	1.16983	1.8066	3.6146	1.35006
132	1.14999	1.09656	1.14532	1.4082	2.31297	1.16177
133	0.84098	0.908458	0.86087	1.45068	2.11789	0.98399
134	1.07447	0.910414	0.879724	1.48325	2.37943	0.852043
135	1.19699	0.933677	1.01506	1.13654	2.28456	0.803673
136	0.830812	0.861722	0.765658	0.90999	1.59833	0.716208
137	0.828277	0.949459	0.667155	1.32288	1.42781	0.76358
138	0.806998	0.788975	0.582088	1.35518	1.29316	0.677463
139	0.767381	0.733347	0.666877	0.87845	1.22337	0.512091
140	0.753429	0.716908	0.629861	0.770883	1.01946	0.567699
141	0.744322	0.595627	0.562444	0.941127	0.976881	0.523683
142	0.887486	0.510324	0.638315	0.80834	0.900711	0.470986
143	0.967188	0.539257	0.67241	0.611744	0.858974	0.538861
144	0.860524	0.509495	0.63162	0.702251	0.820574	0.586812
145	0.869274	0.462959	0.629951	0.685653	0.816738	0.554399
146	1.05442	0.48409	0.712156	0.551713	0.864407	0.518692
147	1.09582	0.527745	0.762866	0.632801	0.797292	0.602455
148	0.996281	0.538888	0.766268	0.778081	0.842837	0.66798
149	1.1158	0.502218	0.759067	0.638114	0.890197	0.650991
150	1.29904	0.564107	0.858742	0.724285	0.932549	0.626236
151	1.3317	0.667248	0.985479	1.08596	0.977427	0.722149
152	1.24198	0.768509	1.04758	1.173	1.24341	0.810953
153	1.16329	0.693556	0.941377	1.04363	1.47817	0.902785
154	1.3449	0.700793	0.919584	0.834353	1.5468	0.759695
155	1.52133	1.29127	1.07691	1.06899	1.40575	1.00374
156	1.94666	1.36877	1.48952	1.27905	2.4764	1.20992
157	1.86043	1.47009	1.97918	1.51655	2.86497	1.67939
158	3.6951	1.74148	2.70371	1.85695	3.40471	2.07689
159	5.34187	1.79809	3.44363	2.15875	4.50932	2.81622
160	6.62739	1.95675	4.41318	2.64792	5.10595	2.92727
161	6.2766	1.89847	5.44507	2.45516	4.40049	3.63483
162	4.90853	1.39416	5.59105	1.70536	3.45688	3.43418
163	5.27197	1.73165	7.20003	1.98511	5.00608	2.754
164	5.54323	1.85806	6.79431	2.16328	5.70055	3.33853
165	5.99429	2.34411	6.20685	2.77494	6.40955	3.23118
166	7.0414	3.08055	6.34155	3.00725	5.85299	4.1651
167	7.2731	2.60235	5.67816	2.70111	5.62372	4.6674
168	6.47121	2.65033	4.69901	2.85254	5.67446	4.24791
169	5.19602	2.62139	4.11886	2.92139	5.30277	3.42131
170	4.70181	2.10079	3.37465	2.6613	5.6328	2.97065
171	3.48283	1.73341	2.34004	2.83441	4.61408	3.17877
172	2.96974	1.35852	1.8292	2.06995	3.17348	2.29525
173	2.33271	1.31873	1.95775	2.22645	2.14112	1.51428
174	1.81402	1.17409	1.53085	1.89713	1.68756	1.68301
175	1.45461	0.889522	1.06425	1.04662	1.33661	1.51366
176	1.38361	0.876217	1.02793	0.891389	1.17535	1.10136
177	1.33097	0.942559	1.05552	0.764716	1.21707	1.05813
178	1.27008	0.781099	0.954588	0.690373	1.21417	1.01504
179	1.17181	0.603469	0.835881	0.727461	1.0989	0.846918
180	1.15969	0.616514	0.830902	0.73317	1.08462	0.750711
181	1.21656	0.75106	0.92401	0.760776	1.15245	0.682234
182	1.07139	0.735412	0.886897	0.744848	1.19005	0.729305
183	0.961086	0.601906	0.751369	0.670973	1.00931	0.714783
184	1.04115	0.629335	0.778054	0.674685	0.957994	0.652164
185	1.12545	0.712591	0.901501	0.841191	1.06773	0.63988
186	0.973592	0.658189	0.80436	0.871822	1.04739	0.718336
187	0.952998	0.595573	0.674844	0.739865	0.923554	0.650353
188	1.17417	0.682574	0.912274	0.822657	1.00863	0.591316
189	1.14702	0.803748	1.08546	1.0579	1.07935	0.733359
190	1.00166	0.774438	0.922221	1.02585	1.0482	0.71176
191	1.0782	0.84864	0.87267	0.85136	1.01187	0.760658
192	2.09446	0.836501	0.894129	1.13496	1.23783	0.994667
193	1.6451	1.24841	1.15958	1.45662	1.68112	1.08143
194	1.27525	0.947902	1.08634	1.4046	1.52631	1.26924
195	1.1246	0.764939	1.00207	1.64685	1.44912	0.96861
196	1.11407	0.816153	0.836071	1.35297	1.0807	0.867928
197	1.34772	0.796734	0.835116	1.05559	1.34622	0.903536
198	0.560685	0.700135	0.635826	1.13878	0.759885	1.45909
199	0.63598	0.551824	0.584773	0.879405	0.730266	1.12891
200	0.483671	0.437294	0.5124	0.796613	0.619267	0.689449
201	0.533684	0.472777	0.534222	1.02653	0.612136	0.578128
202	0.522866	0.479329	0.495879	0.792027	0.569729	0.587247
203	0.456158	0.512102	0.476227	0.774237	0.539713	0.500301
204	0.501458	0.56982	0.584031	0.762954	0.654339	0.498298
205	0.591986	0.47044	0.549808	0.859073	0.657014	0.550461
206	0.633216	0.565113	0.572419	1.02559	0.70261	0.53237
207	0.736376	0.597213	0.66239	0.972714	0.69876	0.584451
208	0.874684	0.622334	0.871397	0.987217	0.827082	0.637248
209	0.929999	0.686016	0.988167	0.938681	0.995288	0.775039
210	1.0105	0.936187	1.0325	0.913387	1.08226	0.87922
211	1.1683	1.11488	1.28794	1.08895	1.12643	0.984941
212	1.36292	1.09437	1.60932	1.33189	1.53044	1.17621
213	1.4178	1.35669	1.72737	1.48598	1.74625	1.5999
214	1.97452	2.03312	1.61465	1.965	2.28247	2.09731
215	2.37692	2.58433	1.57695	2.98063	2.93716	1.7479
216	1.62749	2.49628	1.25681	3.94819	4.0154	2.42408
217	1.12103	1.81391	1.04381	2.56883	2.98204	2.67706
218	1.20446	1.47731	1.39936	3.46942	3.39371	2.16158
219	1.0627	1.8663	1.18657	4.18983	3.83766	2.43916
220	0.785786	1.65148	0.926491	2.94907	2.93197	3.04221
221	0.748538	1.02272	1.08192	1.47082	1.62566	2.56751
222	0.925634	0.830792	0.934598	2.43148	1.76615	1.59193
223	0.867443	0.882277	0.686298	2.52128	1.83031	1.1065
224	0.726152	0.763211	0.612271	2.06318	1.59693	0.639393
225	0.792903	0.668109	0.628276	1.46978	1.09601	0.501784
226	0.892172	0.637335	0.663655	1.3943	1.14488	0.560026
227	0.862451	0.592152	0.657548	1.33095	1.0728	0.598932
228	0.899258	0.547049	0.652423	1.13988	1.03092	0.533648
229	0.994716	0.527912	0.692837	1.11542	0.951565	0.528571
230	1.05062	0.558392	0.755702	1.10375	0.961717	0.61259
231	1.05162	0.553328	0.749329	0.90669	0.94363	0.651957
232	1.12931	0.511973	0.725173	0.82271	0.859812	0.621113
233	1.25403	0.587213	0.824179	1.03987	0.927276	0.604217
234	1.26419	0.614028	0.874936	1.03145	0.964164	0.777273
235	1.32607	0.582289	0.847887	0.76699	0.946105	0.844696
236	1.4509	0.671821	0.931332	1.006	1.05434	0.779385
237	1.5844	0.797793	1.08186	1.33532	1.14281	0.985232
238	1.64388	0.841544	1.17022	1.37501	1.2497	1.19008
239	1.85268	0.987099	1.3684	1.37063	1.46898	1.34086
240	2.03011	1.48507	2.09444	1.73724	1.8458	1.65858
241	2.8086	2.25046	3.40631	2.72564	3.13905	2.44907
Average RMSF	1.42124	0.917941	1.22472	1.25924	1.52579	1.06269

## Sheet: CTP synthase
	CHEMBL48494	CHEMBL1162979	CHEMBL133039	CHEMBL525202	CHEMBL1091856	CTP synthase
0	5.27479	5.37717	4.21259	4.88028	4.23967	4.84944
1	3.62138	3.70111	2.60968	3.10269	3.1863	3.28806
2	1.98372	2.19327	2.09024	1.86233	1.64247	1.88501
3	1.0321	1.46766	0.865482	1.17803	0.806921	0.939597
4	0.998944	1.17755	0.810555	1.23841	0.844363	0.82694
5	0.78469	1.00167	0.573779	0.916181	0.680772	0.700504
6	0.575098	0.765089	0.522851	0.595393	0.460033	0.571485
7	0.542867	0.567914	0.462408	0.541919	0.417095	0.512552
8	0.493395	0.570186	0.43793	0.485562	0.416926	0.451393
9	0.583037	0.597629	0.536239	0.530553	0.457945	0.450585
10	0.680011	0.610141	0.669413	0.57545	0.504642	0.441692
11	0.707384	0.697996	0.86787	0.735665	0.624361	0.498894
12	0.859262	0.789981	0.968522	0.911323	0.746487	0.635245
13	1.46244	0.965371	1.74373	1.59347	1.10167	1.17946
14	1.8394	1.29518	2.26641	2.08095	1.40121	1.65756
15	1.82366	1.5607	2.28061	2.03165	1.5776	1.47093
16	1.45806	1.25336	1.44984	1.39059	1.11527	0.851464
17	1.14745	1.20139	1.00828	1.70299	0.881845	0.681397
18	0.845361	1.09867	0.872626	1.17203	0.611642	0.745117
19	1.01982	0.88188	0.969403	1.10267	0.808886	0.98887
20	0.721847	0.674779	0.692154	0.809027	0.538885	0.578842
21	0.677353	0.670953	0.641554	0.723027	0.483448	0.53244
22	0.582343	0.594846	0.535604	0.533886	0.433695	0.526176
23	0.516844	0.699749	0.534816	0.501191	0.418828	0.51755
24	0.561599	0.6099	0.524316	0.652842	0.430373	0.483806
25	0.573222	0.61286	0.559882	0.607461	0.437418	0.482944
26	0.571923	0.610864	0.511241	0.535378	0.425272	0.537928
27	0.617568	0.688723	0.553429	0.67766	0.480577	0.556347
28	0.688039	0.727906	0.606251	0.821472	0.486088	0.561309
29	0.718999	0.700255	0.584028	0.756027	0.488379	0.602039
30	0.750169	0.746103	0.588945	0.845323	0.542313	0.646795
31	0.84229	0.911381	0.713571	1.10228	0.695845	0.730358
32	0.990611	0.993613	0.789809	1.13671	0.744179	0.815747
33	1.09152	0.989862	0.765543	1.08023	0.777067	0.8677
34	1.1021	1.10234	0.932881	1.36512	0.90084	0.952537
35	1.43381	1.6422	2.1322	1.87816	1.35738	1.91399
36	2.11827	2.09737	1.9933	2.22981	2.37931	2.40586
37	1.67355	2.09822	1.61653	2.35784	1.88509	1.60901
38	1.4066	1.49104	1.08365	1.67636	1.19547	1.14605
39	1.1064	1.62209	0.967524	1.60217	1.10305	1.03507
40	1.00104	1.02394	0.717095	1.22914	0.760609	0.783599
41	1.05262	0.826463	0.750794	1.25166	0.688612	0.665713
42	0.728634	0.639465	0.624036	0.849474	0.539272	0.567842
43	0.715153	0.623115	0.528523	0.69963	0.513094	0.497753
44	0.643767	0.609367	0.564164	0.572367	0.49987	0.471166
45	0.730447	0.631349	0.654542	0.661261	0.543391	0.548138
46	1.05184	0.779028	0.829344	1.1053	0.755643	0.75619
47	1.06827	0.867675	0.984034	1.16554	0.76923	0.793428
48	1.03958	0.923653	1.1082	1.05096	0.738623	0.910305
49	1.03553	0.955941	0.937527	1.18969	0.796691	1.00352
50	1.25442	1.01194	1.17538	1.38445	0.76475	0.998286
51	1.49449	1.00748	1.23595	1.41494	0.741998	0.947253
52	2.4062	1.38128	1.6232	1.91894	0.724161	0.896859
53	2.06944	1.44973	1.24597	2.20829	0.768288	0.763613
54	2.10875	1.38192	1.60906	2.55194	0.790908	0.914375
55	1.92695	1.28618	1.70924	1.97902	0.877049	1.0071
56	1.72021	1.08277	1.28806	1.7019	1.04663	1.10966
57	1.63021	1.13897	2.00574	2.04047	1.27759	1.33068
58	1.19374	1.13178	2.3357	1.89587	1.19378	1.49641
59	1.43478	1.23567	1.60128	1.78854	1.14795	1.40582
60	1.19606	1.16646	1.37289	1.66039	1.03972	0.96034
61	0.875591	0.912175	1.76689	1.32516	0.806565	1.0328
62	0.726745	0.861516	1.14946	1.164	0.896512	0.839124
63	0.674359	0.681725	0.869	0.982383	0.608571	0.786474
64	0.731228	0.688433	0.816716	1.08391	0.553354	0.733654
65	0.656049	0.670102	0.679459	1.02731	0.521115	0.647201
66	0.679401	0.678936	0.700846	1.08646	0.545847	0.672991
67	0.767844	0.721	0.741757	1.14409	0.608441	0.748113
68	0.814949	0.84909	0.805384	1.23469	0.836395	0.843234
69	1.17772	1.09846	1.11168	1.50044	1.05396	0.983591
70	0.96417	1.01111	0.97594	1.4163	0.902881	0.861169
71	0.880157	0.815156	0.863066	1.28467	0.710636	0.835668
72	0.828768	0.774701	0.832182	1.24832	0.599172	0.784466
73	0.805568	0.739097	0.776178	1.06758	0.52975	0.661809
74	0.757539	0.764173	0.722776	1.00265	0.541516	0.6454
75	0.693993	0.799856	0.661881	0.851493	0.593872	0.592551
76	0.610274	0.6492	0.62006	0.887742	0.574099	0.522114
77	0.643129	0.644115	0.579782	0.873338	0.52825	0.559743
78	0.687432	0.712016	0.555765	0.885817	0.648424	0.626015
79	0.580502	0.682564	0.514952	0.846691	0.54368	0.546479
80	0.602569	0.657835	0.509982	0.754091	0.522495	0.564573
81	0.685206	0.729592	0.570286	0.886356	0.780183	0.632105
82	0.64282	0.912784	0.557811	0.907177	0.874724	0.583867
83	0.69818	0.869556	0.548493	1.01348	0.550517	0.543779
84	0.743095	0.846282	0.55948	0.914938	0.68163	0.583947
85	1.26201	0.940713	0.683044	1.55667	0.970876	0.650146
86	1.17365	0.911445	0.735889	1.43871	0.928097	0.682199
87	1.33478	1.09635	0.986486	1.75236	0.974358	0.824531
88	0.795892	0.856175	0.977301	1.26717	0.695431	0.784459
89	1.1846	1.27733	1.32292	1.29635	0.721241	1.25316
90	0.960614	1.02063	1.03367	1.06551	0.795524	0.907752
91	0.892934	0.958593	0.896049	0.978212	0.808578	0.736158
92	0.892306	1.14077	1.20506	0.862455	0.593009	0.8293
93	0.85051	0.783596	0.735893	0.765835	0.56849	0.573719
94	0.978423	0.754292	0.751106	0.742761	0.571359	0.650302
95	0.971692	0.711104	0.865092	0.926207	0.606323	0.755741
96	1.00552	0.832549	0.894228	0.909568	0.680934	0.791981
97	1.0673	0.942831	0.991983	1.01946	0.742962	0.919352
98	1.07686	0.902679	1.12473	1.23984	0.853739	0.985408
99	1.04832	0.929673	1.09871	1.57093	0.891946	0.925498
100	1.19332	1.16322	1.16267	1.5776	0.945556	1.01962
101	1.23463	1.35079	1.22652	1.87036	1.10504	1.16974
102	1.29507	1.50152	1.34125	2.26362	1.31137	1.2384
103	1.38919	1.6277	1.3742	2.61868	1.31601	1.26805
104	1.68255	1.81371	1.70722	3.19955	1.55148	1.53635
105	1.8624	1.99725	1.95274	3.36419	1.80101	1.75996
106	1.87602	1.99948	1.96552	3.23181	1.84947	1.73508
107	2.03079	2.19426	2.09155	3.67227	1.9555	1.84626
108	2.46517	2.58307	2.57037	4.42346	2.36213	2.18958
109	2.67959	2.72961	3.00466	4.55218	2.67521	2.35256
110	2.64228	2.7633	2.98577	4.73592	2.85304	2.38226
111	2.56831	2.58722	3.29236	5.33321	3.27869	2.17655
112	2.70529	2.68157	3.5479	6.27905	3.42554	2.08194
113	3.06242	3.30405	3.94356	6.26544	3.79692	2.65862
114	4.24648	4.54662	3.95376	5.2593	3.73195	3.003
115	3.6729	4.18734	3.29778	4.55763	3.02477	2.46698
116	2.90437	4.10001	2.47877	3.91218	2.51697	2.11746
117	1.85414	2.75143	1.678	3.0634	1.74057	1.54792
118	1.57754	2.66236	1.37186	2.2112	1.50337	1.30622
119	1.39725	2.14388	1.07174	1.99396	1.18083	1.05194
120	1.17367	2.31472	0.956518	1.78881	1.03249	0.932941
121	1.21609	2.06225	0.966319	1.47598	0.894326	1.03792
122	1.22608	1.61549	0.89869	1.46838	0.878486	0.987678
123	1.06561	1.65791	0.764646	1.4982	0.773786	0.769657
124	1.00523	1.91101	0.774076	1.4084	0.762632	0.833782
125	1.06717	1.64509	0.823263	1.38513	0.801482	0.962021
126	1.0619	1.3592	0.792352	1.29867	0.78595	0.873806
127	0.948416	1.59325	0.727405	1.30457	0.780202	0.711799
128	1.06736	1.72407	0.78559	1.38512	0.790477	0.801272
129	1.1009	1.70211	0.893814	1.51116	0.817209	1.00421
130	1.12797	1.54553	0.843873	1.3458	0.77776	0.965345
131	1.01909	1.59637	0.741933	1.31275	0.725854	0.776232
132	1.1807	1.87884	0.87235	1.57589	0.832824	0.857845
133	1.30664	1.92247	0.998541	1.70404	0.962642	1.30286
134	1.24959	1.59114	1.07978	1.54244	0.98309	1.56645
135	1.22079	1.73866	1.02111	1.57674	1.01372	1.3427
136	1.49016	2.1403	1.13053	2.07629	1.20266	1.23927
137	1.58936	1.98533	1.24787	2.22731	1.21143	1.20094
138	1.2055	1.4806	0.903263	1.56777	0.884739	0.92304
139	1.12118	1.34967	0.848644	1.29827	0.843445	0.882667
140	0.952352	1.10389	0.679039	0.992292	0.677078	0.777191
141	0.86102	0.938008	0.62236	0.844096	0.686906	0.711935
142	0.588123	0.571951	0.504955	0.577754	0.533557	0.533911
143	0.582613	0.558098	0.531786	0.565319	0.474106	0.483696
144	0.523955	0.572105	0.521233	0.488249	0.435739	0.422244
145	0.678226	0.617644	0.543307	0.57338	0.463213	0.442441
146	0.792436	0.659043	0.906253	0.681921	0.572838	0.471215
147	0.832065	0.836606	1.31233	0.815694	0.698666	0.6004
148	0.860706	0.987227	1.08316	1.01086	1.1472	0.70812
149	1.01598	1.00891	1.12257	1.09254	1.1785	0.773872
150	1.52132	1.34758	1.54682	1.58435	1.57372	1.16068
151	2.24787	1.31064	2.27632	1.57047	1.50769	1.16328
152	1.91867	1.43322	2.17554	1.66468	1.50301	1.31158
153	2.1537	1.36962	1.88645	1.59773	1.36181	1.1868
154	1.51412	1.09692	1.04907	1.49606	0.990861	0.847837
155	1.0473	1.14135	1.03085	1.46962	0.920873	0.930742
156	0.856563	1.15047	0.893021	1.26658	0.877892	0.86135
157	0.768293	1.02397	0.74806	1.01595	0.68769	0.675153
158	0.8429	0.94216	0.794305	1.168	0.69413	0.692467
159	0.895643	0.987672	0.882976	1.28154	0.740864	0.819694
160	0.826357	0.935295	0.790922	1.07709	0.724135	0.758859
161	0.802359	0.87368	0.749184	1.02046	0.691351	0.68394
162	0.87777	0.856402	0.739883	1.23467	0.690484	0.738477
163	0.964016	0.924937	0.824935	1.3882	0.758228	0.856246
164	0.904536	1.04791	0.772	1.21115	0.765146	0.817897
165	0.793565	0.952703	0.691361	1.23673	0.822246	0.848749
166	0.992512	1.1581	1.00064	1.5552	1.01624	1.38847
167	1.1525	1.66465	1.02157	1.72098	0.96773	1.31547
168	1.1187	1.48263	0.885513	1.41813	1.13499	1.05515
169	0.765466	0.994757	0.719611	1.02133	0.908351	0.862451
170	0.599332	0.696578	0.585495	0.700777	0.578919	0.672008
171	0.590026	0.641971	0.548711	0.675045	0.555431	0.605937
172	0.522107	0.563303	0.555621	0.579136	0.439895	0.484022
173	0.560652	0.565451	0.539375	0.624054	0.512953	0.470602
174	0.586503	0.582566	0.524751	0.615604	0.505635	0.44873
175	0.644501	0.675135	0.665491	0.869188	0.625969	0.532594
176	0.865465	0.723763	0.830249	0.921838	0.683878	0.591117
177	1.32107	0.862216	1.00814	1.14511	0.794915	0.813121
178	2.25829	1.26874	1.43691	1.48955	1.20285	1.28515
179	3.02064	2.01945	1.72258	1.8052	1.79676	1.42978
180	2.63652	1.65717	1.71403	2.02755	1.39688	1.58891
181	2.0791	1.44303	1.67389	2.09144	1.39215	1.49977
182	1.36436	1.08278	1.42227	1.77272	1.03251	1.29599
183	1.39801	1.17258	1.37093	1.88312	1.14514	1.34135
184	1.42001	1.14895	1.33531	1.7852	1.16705	1.34789
185	1.1655	0.982454	1.11439	1.53313	0.954552	1.06766
186	1.02881	0.926078	1.01376	1.49201	0.860626	0.92148
187	1.16527	1.08613	1.16672	1.6282	1.04001	1.08301
188	1.10469	1.06542	1.1185	1.48706	1.02771	1.02184
189	0.932734	0.923449	0.985834	1.27703	0.844408	0.811171
190	0.980641	1.01781	1.0512	1.44943	0.909938	0.890822
191	1.06239	1.13791	1.14562	1.47236	0.993588	0.971471
192	0.959215	0.98931	1.00485	1.20537	0.907352	0.838673
193	0.860306	0.917831	0.946834	1.19394	0.882889	0.815777
194	0.998963	1.0667	1.09072	1.41174	0.96681	0.971039
195	1.03664	1.04215	1.04643	1.27509	0.928434	0.909891
196	0.893065	0.903772	0.934947	1.1233	0.929055	0.838497
197	0.991137	0.99431	1.01493	1.40874	0.989696	1.0239
198	1.08876	1.08242	1.08954	1.49068	0.930298	1.07315
199	1.00327	1.01815	1.01043	1.361	0.948855	1.01215
200	1.04748	1.05065	1.00548	1.42895	0.99164	1.04815
201	0.887004	0.935742	0.820639	1.08708	0.800052	0.840822
202	0.989326	0.99742	0.960038	1.15644	1.06522	0.933618
203	0.846211	0.950425	0.835574	1.07513	0.947922	1.04761
204	0.709696	0.814951	0.751626	1.02367	0.83002	0.873787
205	0.62216	0.634007	0.616958	0.830601	0.599421	0.578338
206	0.632111	0.605882	0.627052	0.776633	0.560559	0.525408
207	0.694461	0.5856	0.629234	0.682284	0.518978	0.510355
208	0.755739	0.643852	0.633114	0.803862	0.610479	0.545651
209	0.822353	0.693349	0.690949	0.869618	0.664488	0.543128
210	1.05835	0.855782	0.739986	0.983929	0.951266	0.66916
211	1.2928	1.05468	0.954406	1.14673	1.18613	0.929215
212	1.37196	1.17474	1.37003	1.877	1.06923	1.16693
213	1.42628	1.25522	1.07142	2.81688	1.11852	1.15023
214	1.48573	1.30574	1.14658	2.4355	1.21478	1.21339
215	1.52215	1.35626	1.19842	3.36418	1.21511	1.29992
216	1.29348	1.12487	1.01508	1.92265	1.01198	1.1234
217	1.1532	1.0232	0.924904	1.74499	0.954955	1.00509
218	1.2892	1.13115	1.02061	1.79499	1.0506	1.13491
219	1.2181	1.04356	0.980334	1.78114	0.951571	1.05373
220	0.99286	0.880074	0.838334	1.52214	0.818311	0.838336
221	1.08093	0.967572	0.913422	1.60083	0.950719	0.967761
222	1.2248	1.08703	1.05998	1.79809	1.03618	1.11431
223	1.06825	0.996839	0.966763	1.65973	0.899528	0.976476
224	1.00089	1.01911	0.939018	1.54441	0.910024	0.968381
225	1.22504	1.21885	1.16522	1.82683	1.12231	1.24271
226	1.27069	1.37061	1.30511	1.95972	1.15537	1.29437
227	1.13577	1.3182	1.17762	1.7921	1.0479	1.18405
228	1.24512	1.47306	1.23988	1.90445	1.2224	1.32952
229	1.09676	1.29203	1.0064	1.61241	1.06643	1.17408
230	1.21506	1.16651	1.12194	1.74597	1.17022	1.2582
231	1.2535	1.174	1.11695	1.68682	1.21191	1.25757
232	1.17443	1.18344	0.936857	1.41446	1.19701	1.11256
233	0.89404	0.859487	0.750799	1.22744	0.905092	0.856224
234	0.757992	0.663297	0.675574	0.940281	0.647015	0.622795
235	0.76342	0.664955	0.645115	0.785846	0.665367	0.59029
236	0.822564	0.691554	0.636075	0.786852	0.66168	0.60902
237	0.965046	0.691958	0.636378	0.804246	0.758692	0.610523
238	0.945319	0.767771	0.718962	1.0317	0.821584	0.686049
239	0.901712	0.892365	0.777854	1.06123	0.735831	0.752115
240	0.977866	0.950537	0.811613	1.19569	0.780759	0.883515
241	1.26805	1.10174	0.998745	1.42122	1.0534	1.21446
242	1.04999	0.764846	0.689432	1.10469	0.681891	0.788476
243	0.819315	0.676845	0.593473	0.924389	0.627405	0.634442
244	0.85213	0.701448	0.597731	0.921152	0.646646	0.642868
245	0.952069	0.738669	0.669378	0.989967	0.612713	0.688359
246	0.835611	0.688597	0.609747	0.831945	0.537086	0.630123
247	0.827476	0.648008	0.592895	0.745709	0.495034	0.593215
248	0.923339	0.651003	0.696028	0.815022	0.512733	0.688852
249	0.929563	0.644909	0.637785	0.767697	0.513147	0.656622
250	0.825429	0.624769	0.642455	0.668996	0.478486	0.62277
251	0.894932	0.705707	0.654224	0.758026	0.509138	0.672638
252	0.990461	0.772753	0.709023	0.838985	0.642009	0.775669
253	0.829694	0.715481	0.693451	0.788663	0.593047	0.735637
254	0.834804	0.767088	0.677938	0.73324	0.628057	0.706557
255	0.687902	0.647857	0.648267	0.77948	0.559334	0.688119
256	0.724772	0.636434	0.68998	0.818477	0.518454	0.66268
257	0.855322	0.826452	0.76644	0.757745	0.606306	0.711385
258	0.730677	0.820066	0.63402	0.715871	0.583656	0.704336
259	0.687046	0.684857	0.559176	0.688771	0.504942	0.618358
260	0.820959	0.749342	0.710442	0.745298	0.558034	0.672818
261	0.89105	0.913419	0.7445	0.817318	0.672644	0.792556
262	0.823522	0.907467	0.673059	0.852938	0.66212	0.792043
263	0.962429	0.807384	0.70843	0.90809	0.628616	0.806888
264	1.13703	0.98567	0.862763	1.0374	0.734073	0.962642
265	1.13588	0.987375	0.897297	1.01265	0.723199	0.946812
266	1.99849	1.26954	1.22317	1.25055	0.945309	1.35248
267	2.70868	1.64757	1.40649	1.56544	1.15339	1.34938
268	3.18243	2.03702	2.41318	2.53012	1.49431	1.81975
269	2.88743	1.90311	2.16792	2.5043	1.56161	2.29199
270	3.49375	1.43094	2.51672	3.26929	1.70083	2.94433
271	3.59384	0.991661	2.79136	3.52517	1.49377	2.31251
272	3.2208	0.89034	3.18957	3.64534	1.15407	2.09368
273	2.70496	0.871082	2.72156	3.27348	1.34198	1.88009
274	1.76087	0.888312	1.43786	1.7885	0.882896	1.49369
275	1.30008	0.845868	0.949251	1.10235	0.784795	1.00991
276	1.30795	0.926113	0.990377	1.17543	0.812198	1.0089
277	1.15221	0.790943	0.854948	1.1015	0.713458	0.787405
278	1.05092	0.742606	0.744777	1.06679	0.692674	0.676775
279	1.21719	0.916599	0.953946	1.27934	0.853786	0.927558
280	1.2455	0.949876	0.992461	1.24429	1.06714	0.952379
281	1.29999	1.0382	1.13471	1.34133	1.27581	1.1754
282	1.20894	0.892846	1.0192	1.23437	0.954963	1.01406
283	1.41033	1.23972	1.40167	1.50817	1.29806	1.32925
284	1.13555	1.08872	1.35581	1.14725	1.01536	1.1798
285	1.03029	1.0474	1.20525	1.05238	0.915378	1.00969
286	0.801651	0.807938	0.815469	0.821394	0.71248	0.727412
287	0.754128	0.798375	0.74003	0.857614	0.699189	0.710175
288	0.617382	0.627411	0.589766	0.672601	0.574151	0.600876
289	0.626519	0.667391	0.58914	0.714843	0.576283	0.601794
290	0.583176	0.654446	0.541251	0.671977	0.521108	0.578275
291	0.620452	0.752527	0.576306	0.728517	0.560208	0.630656
292	0.781128	0.911947	0.693967	0.797981	0.681199	0.745368
293	1.00436	1.3426	0.825663	1.15103	1.15843	0.984117
294	0.951532	1.27642	0.80718	1.11117	0.960721	1.03058
295	1.13323	1.75177	0.843543	1.58951	1.20505	1.2117
296	0.958597	1.77824	0.784252	1.29596	0.994698	1.12825
297	0.812951	0.994451	0.640741	1.32058	0.865637	0.84593
298	0.815119	1.15206	0.661885	1.46413	0.915072	0.821221
299	0.859057	1.41785	0.738364	1.18479	0.911406	1.07648
300	0.728506	1.19656	0.651358	0.800321	0.679356	0.871517
301	0.596956	0.803764	0.523824	0.693027	0.5853	0.640222
302	0.615551	0.688254	0.518606	0.752088	0.634648	0.696639
303	0.684784	0.563986	0.479346	0.772873	0.592491	0.645814
304	0.522393	0.510316	0.431661	0.58471	0.502248	0.538313
305	0.567404	0.539824	0.446191	0.593031	0.573012	0.560832
306	0.681503	0.578079	0.456996	0.631629	0.606906	0.571862
307	0.594965	0.510492	0.466141	0.592177	0.542397	0.534625
308	0.563819	0.481079	0.474388	0.59219	0.52684	0.514942
309	0.689727	0.519971	0.511955	0.686724	0.584719	0.53444
310	0.718418	0.551853	0.541977	0.702073	0.587081	0.513603
311	0.671933	0.553099	0.559444	0.650433	0.527708	0.518662
312	0.729833	0.579945	0.597516	0.711596	0.544398	0.552246
313	0.885367	0.629253	0.6328	0.837082	0.626051	0.59236
314	0.897759	0.747178	0.712087	0.835973	0.674703	0.649603
315	0.932814	0.853505	0.792133	0.792101	0.694153	0.752058
316	1.05088	0.892488	0.894928	0.951814	0.793418	0.804147
317	0.917772	0.818115	0.877448	0.884706	0.678352	0.752783
318	0.884652	0.912187	1.07916	0.945417	0.715268	0.817671
319	0.777812	0.751683	0.843727	0.876812	0.670634	0.723586
320	0.840152	0.814454	0.774118	0.949021	0.731786	0.732996
321	0.811882	0.805948	0.666873	0.9052	0.709314	0.705607
322	0.76459	0.78728	0.692124	0.959749	0.691452	0.709501
323	0.807083	0.790995	0.707726	0.930511	0.720493	0.735426
324	0.791221	0.875807	0.746957	0.967996	0.701448	0.747075
325	0.871979	0.980731	0.849462	1.00649	0.810328	0.818958
326	0.922125	1.04328	0.938858	1.03518	0.861015	0.838029
327	1.12269	1.33381	1.03213	1.19339	1.10778	1.00495
328	1.13102	1.27665	1.0445	1.23041	1.04793	1.01584
329	1.08677	1.30532	1.20149	1.22606	1.01959	1.01953
330	1.33955	1.57399	1.48901	1.50005	1.2773	1.24342
331	1.4123	1.55239	1.48455	1.51355	1.25018	1.2515
332	1.26409	1.38153	1.38871	1.34636	1.05363	1.16095
333	1.47105	1.5665	1.61502	1.53468	1.2492	1.3124
334	1.77081	1.85404	1.83688	1.8724	1.49728	1.53443
335	1.78055	1.80302	1.76824	1.85479	1.4162	1.51889
336	1.66812	1.72915	1.71444	1.67544	1.33455	1.4851
337	1.29441	1.42286	1.39078	1.41203	1.03053	1.22329
338	1.15993	1.24662	1.24838	1.2527	0.892766	1.05563
339	1.46267	1.56307	1.48937	1.45908	1.12017	1.26409
340	1.24055	1.40669	1.31548	1.3445	1.04232	1.13828
341	0.785196	0.874414	0.781802	0.924943	0.684058	0.741163
342	0.702153	0.765287	0.653412	0.791005	0.603365	0.661232
343	0.591472	0.621422	0.561279	0.642664	0.515913	0.578664
344	0.526475	0.540547	0.492458	0.612442	0.471974	0.532858
345	0.459344	0.465451	0.429478	0.552541	0.461564	0.479055
346	0.455929	0.502226	0.440854	0.610325	0.453484	0.494434
347	0.488406	0.546313	0.510456	0.648946	0.494706	0.559545
348	0.585402	0.593459	0.554697	0.806203	0.576066	0.705403
349	0.903045	1.17326	0.859256	1.02598	0.758208	1.34872
350	1.03915	1.44645	0.914988	0.985129	0.66754	2.03032
351	1.89095	1.93053	1.07906	1.60263	1.29614	1.93941
352	1.47272	1.75588	0.922151	1.37472	1.1533	2.27074
353	1.53498	1.38186	0.969193	1.30218	1.59083	1.2606
354	1.34856	1.1695	0.859399	1.03975	1.11772	0.873036
355	0.924342	0.97621	0.729353	0.867866	0.851871	0.760786
356	0.936836	0.967862	0.803327	0.949504	0.828434	0.773842
357	0.971627	0.973729	0.810181	0.964776	0.849012	0.773062
358	0.749469	0.786088	0.697076	0.818216	0.679433	0.671671
359	0.682329	0.747432	0.702842	0.827518	0.583677	0.683647
360	0.794104	0.861925	0.798124	0.910903	0.659231	0.752301
361	0.705182	0.791693	0.697544	0.795403	0.607039	0.677704
362	0.590584	0.670769	0.603302	0.706039	0.544196	0.574819
363	0.671462	0.755595	0.701271	0.823133	0.584538	0.690383
364	0.736131	0.819718	0.703934	0.851447	0.611891	0.727793
365	0.654823	0.709399	0.602043	0.765756	0.551037	0.607514
366	0.670454	0.749529	0.61794	0.849107	0.560212	0.631887
367	0.816512	0.85973	0.723962	0.993176	0.68783	0.795603
368	0.836074	0.914468	0.714554	0.963205	0.69804	0.786098
369	0.744664	0.822744	0.684989	0.854019	0.645636	0.725631
370	0.636516	0.683378	0.58709	0.71761	0.546346	0.622459
371	0.547479	0.564335	0.500745	0.560791	0.464906	0.549169
372	0.453612	0.484711	0.423433	0.527601	0.417543	0.478836
373	0.425006	0.422907	0.386553	0.469363	0.413392	0.438381
374	0.432718	0.44785	0.435328	0.588904	0.443707	0.450799
375	0.474476	0.47904	0.442463	0.510235	0.415244	0.469078
376	0.567177	0.589308	0.547999	0.59783	0.474097	0.571427
377	0.58375	0.658778	0.504801	0.646775	0.508566	0.607238
378	0.53298	0.630113	0.488391	0.59556	0.472489	0.586774
379	0.505139	0.506372	0.473438	0.57044	0.451649	0.520227
380	0.541853	0.527586	0.535457	0.650561	0.520424	0.538624
381	0.526891	0.589421	0.567239	0.671506	0.514491	0.540569
382	0.506952	0.53536	0.55423	0.644964	0.478785	0.553766
383	0.547272	0.584437	0.589582	0.781095	0.525562	0.59614
384	0.590515	0.665164	0.656519	0.868189	0.602721	0.621176
385	0.584217	0.662598	0.75694	0.86931	0.622768	0.606184
386	0.687582	0.762856	0.818691	0.941978	0.634139	0.771248
387	0.773687	0.869992	0.820809	1.15265	0.776357	0.857298
388	0.808993	0.908813	0.89748	1.23399	0.879653	0.847033
389	0.848147	0.955702	1.20581	1.21147	0.835952	0.89732
390	0.939329	0.979766	1.35913	1.33438	0.834503	1.15496
391	1.06527	1.04621	1.28148	1.57268	0.959795	1.32107
392	1.14507	1.19699	1.13147	1.71493	1.10159	1.31788
393	1.1063	1.11746	1.02024	1.77823	1.05497	1.27044
394	1.34394	1.28658	1.12891	2.01908	1.27765	1.41228
395	1.30086	1.21491	1.06577	1.8642	1.22471	1.25135
396	0.927428	1.0499	0.778147	1.4418	0.917576	0.993734
397	0.903906	0.98162	0.719086	1.20679	0.854497	0.876993
398	0.904864	1.00465	0.729028	1.07796	1.06611	0.78773
399	1.12274	1.49157	0.895053	1.31346	1.43083	1.01905
400	1.23852	1.61653	0.881155	1.16745	1.40005	1.06743
401	1.76607	1.55003	0.888183	1.31221	1.19523	1.31039
402	2.045	1.8064	1.0891	1.719	1.43446	1.57322
403	2.22009	2.17868	1.51322	2.1528	1.78286	1.90713
404	2.84461	2.49078	1.63821	2.69992	2.03087	2.29617
405	2.08096	1.93285	1.36531	2.38832	1.56332	1.80908
406	2.00688	2.0827	1.39351	2.50533	1.48075	1.88651
407	1.29611	1.59224	1.13628	2.09741	1.12505	1.41408
408	1.04264	1.35544	0.944807	1.65546	0.931128	1.03147
409	0.866358	1.24765	0.839784	1.42792	0.754676	0.872127
410	0.805068	0.944417	0.719671	1.1948	0.709785	0.7508
411	0.928909	1.23963	0.782389	1.14485	0.853495	0.909347
412	0.96787	1.62631	1.16298	1.05989	1.14293	0.954988
413	1.04891	2.0708	1.61824	1.10866	1.35661	1.12568
414	1.46689	3.30968	2.98106	1.72645	1.77417	1.79412
415	1.70843	3.91253	2.79789	1.75515	2.02253	2.00082
416	1.6003	4.72328	1.34415	1.74814	1.58377	2.02459
417	1.43974	4.7607	2.86859	2.36781	1.36942	1.44991
418	1.7751	6.16632	3.15095	3.56498	1.80005	1.95361
419	2.39037	6.73189	2.95325	3.0756	2.32887	2.21061
420	2.56628	7.32974	5.0378	3.4727	1.87443	1.94656
421	2.24975	7.57292	4.83601	3.5206	2.34032	2.15464
422	1.75069	6.73413	4.29394	3.44057	1.97237	1.60394
423	1.42977	4.42022	1.97766	2.26956	1.68654	1.20922
424	1.02042	3.32647	1.10853	1.93675	1.02837	0.915084
425	0.868827	1.25701	0.817415	1.65992	0.805963	0.758712
426	0.907894	0.881057	0.835047	1.4462	0.750123	0.783615
427	0.863478	0.898217	0.832159	0.979164	0.765177	0.799672
428	0.819285	0.836823	0.775368	1.00701	0.69244	0.756984
429	0.870001	0.900855	0.827756	0.907116	0.66402	0.791675
430	0.941575	0.884777	0.860824	1.00383	0.7445	0.874471
431	0.912241	0.753396	0.85759	0.911158	0.731039	0.786687
432	1.01216	0.849921	1.12275	1.114	0.838252	0.912261
433	0.962617	0.877407	1.15499	0.950686	1.06355	1.03836
434	1.14178	1.42345	1.79395	1.19742	1.28527	1.45448
435	1.3676	2.61052	1.62857	1.49878	1.48466	2.24894
436	1.12999	1.87653	1.70649	1.76017	1.07438	1.90754
437	1.20193	2.02261	1.4646	1.4651	1.44058	1.48659
438	1.0971	1.70292	1.3852	1.21911	1.91381	1.60686
439	1.19106	1.82593	1.5152	1.09833	1.96614	1.85561
440	1.11231	1.41932	1.24129	1.01664	2.00279	2.00275
441	1.23853	1.45456	1.32135	1.11759	1.74315	2.30956
442	1.12005	1.24822	1.25706	1.0749	1.53136	2.58089
443	1.29411	1.49789	1.56474	2.14276	1.7769	1.97859
444	1.18847	1.31734	1.67846	2.7439	1.37632	1.40723
445	0.900997	0.975036	1.07259	1.51175	0.979275	0.947297
446	0.929185	1.1197	0.963556	1.52975	0.911568	0.927109
447	1.01385	1.15734	1.06184	1.32267	0.891169	1.12897
448	0.853046	0.928299	0.759173	0.934414	0.651673	0.856082
449	0.706814	0.691365	0.633576	0.726905	0.527128	0.715086
450	0.667741	0.66886	0.593061	0.703333	0.516541	0.720475
451	0.663147	0.656019	0.598396	0.703729	0.522046	0.766676
452	0.770173	0.801133	0.670663	1.06763	0.567781	0.826552
453	0.774535	1.00005	0.640256	0.962981	0.649738	0.995569
454	0.839886	0.856125	0.769058	1.33471	0.95871	0.920743
455	0.820454	0.798422	0.693647	1.15161	0.682577	1.07161
456	0.918976	0.727712	0.85555	1.37503	0.679089	1.0655
457	0.904871	0.685346	0.754969	1.37835	0.662083	0.892496
458	1.42187	1.09065	0.773437	1.58098	0.751277	1.09277
459	1.55742	1.60188	0.91935	1.78838	0.919866	1.43336
460	1.74028	1.7331	1.06399	1.9121	0.976035	1.71833
461	1.32737	1.24498	0.929713	1.56181	0.864041	1.28346
462	1.10352	1.4307	0.869722	1.38623	0.846854	1.13149
463	1.39731	1.65181	1.09954	1.59784	1.00327	1.74735
464	1.42783	1.41921	1.28814	1.73082	1.03429	1.77623
465	1.48019	1.66132	1.31144	1.55811	0.949953	1.44153
466	1.75904	1.53537	1.56161	1.68465	1.10516	2.14794
467	1.47101	1.29172	1.41833	1.5859	1.08419	1.50369
468	1.79877	1.85977	1.44981	1.75821	1.23196	1.63438
469	1.49429	1.28449	1.18294	1.33026	1.17775	1.29771
470	1.02103	0.759033	1.00728	1.08376	0.795618	1.02182
471	0.805048	0.728637	0.91462	1.01973	0.688189	0.898178
472	0.765197	0.703478	0.859086	1.06089	0.7252	0.958124
473	0.842679	0.689863	1.0049	0.990592	0.92829	1.24189
474	0.889413	0.663832	0.918423	0.892013	1.02615	1.12524
475	0.92446	0.740028	1.05097	1.01754	0.849164	0.865711
476	0.882443	0.747965	1.00243	1.08377	0.925624	0.790361
477	1.10143	1.10366	1.175	1.6568	1.80573	1.08873
478	1.1211	1.05913	1.13966	2.03564	1.52779	1.11781
479	1.1989	0.967175	1.14616	1.89331	1.12954	1.08375
480	0.969497	0.704847	1.01963	1.23994	0.854235	0.941656
481	0.901435	0.5885	1.06101	0.952169	0.787819	0.913038
482	0.758125	0.515757	0.754795	0.717033	0.716694	0.761228
483	0.626378	0.520066	0.698741	0.694746	0.530321	0.621728
484	0.556799	0.510465	0.686281	0.741879	0.517473	0.622387
485	0.623347	0.616706	0.636056	0.725434	0.584048	0.696183
486	0.696114	0.715922	0.656708	0.816617	0.623547	0.690855
487	0.936935	0.980939	0.832383	0.876874	0.799774	0.870388
488	1.04902	1.15995	1.01143	1.07814	0.775822	1.00318
489	0.772899	0.850789	0.668047	0.755897	0.637192	0.764189
490	0.832846	0.90351	0.733726	0.76523	0.696385	0.817716
491	0.629758	0.65122	0.570615	0.571191	0.518031	0.603639
492	0.535297	0.540928	0.47352	0.554133	0.469148	0.527093
493	0.597123	0.50334	0.489347	0.590709	0.548761	0.560996
494	0.505542	0.544145	0.503289	0.587412	0.520072	0.49571
495	0.481032	0.433057	0.465077	0.535943	0.4308	0.451523
496	0.570624	0.46449	0.564011	0.616035	0.470461	0.559198
497	0.585291	0.508478	0.509616	0.603127	0.478646	0.636742
498	0.52755	0.520655	0.473886	0.529208	0.48885	0.622628
499	0.545146	0.570633	0.474944	0.545352	0.527277	0.619987
500	0.512115	0.577182	0.457825	0.578747	0.548526	0.549326
501	0.562219	0.606403	0.539675	0.664677	0.566665	0.623218
502	0.600691	0.61727	0.561948	0.735668	0.61334	0.660584
503	0.57265	0.60523	0.564752	0.630649	0.583964	0.605325
504	0.626843	0.62188	0.638458	0.711637	0.706621	0.607437
505	0.697141	0.679847	0.660586	0.768824	0.738117	0.567926
506	0.800304	0.78313	0.816447	0.894908	0.910586	0.63474
507	0.800509	0.788241	0.7991	0.862494	0.862534	0.673322
508	0.698614	0.621758	0.632183	0.658024	0.629064	0.577749
509	0.660607	0.623843	0.657152	0.635765	0.667343	0.608814
510	0.683912	0.643054	0.690111	0.737907	0.724096	0.672351
511	0.586567	0.575601	0.55013	0.635721	0.623593	0.600841
512	0.532418	0.502359	0.489403	0.489983	0.482289	0.504435
513	0.634375	0.576243	0.593873	0.618226	0.557514	0.56927
514	0.62562	0.57421	0.587139	0.587685	0.585832	0.579542
515	0.537439	0.509495	0.519769	0.495799	0.488617	0.518137
516	0.624724	0.574634	0.565373	0.58417	0.519665	0.559019
517	0.724583	0.659021	0.643782	0.665288	0.597088	0.655898
518	0.663225	0.648935	0.608466	0.611233	0.573349	0.657261
519	0.692076	0.676003	0.623619	0.676617	0.58376	0.661765
520	0.857356	0.811066	0.764597	0.867118	0.71833	0.776545
521	0.966309	0.930701	0.857595	0.901043	0.818877	1.00827
522	1.14292	0.97683	0.938817	1.01647	0.860408	2.30085
Average RMSF	1.09474	1.16745	1.03131	1.31825	0.923264	0.989231

## Sheet: Thymidine Kinase
	CHEMBL3674540	CHEMBL1683320	CHEMBL391279	ZINC000031750813	CHEMBL4078273	Thymidine kinase
0	1.39751	1.04024	1.37996	3.1427	1.81933	2.41207
1	1.00365	0.742578	0.807533	2.32497	1.09363	1.43181
2	0.968858	0.63644	0.696392	2.19838	0.857869	1.00166
3	0.895209	0.542623	0.577271	1.94172	0.634189	0.728335
4	0.809762	0.511733	0.547599	1.79418	0.580716	0.652668
5	0.696536	0.490494	0.533627	1.67978	0.542982	0.569151
6	0.598342	0.50722	0.548734	1.43651	0.574747	0.651897
7	0.649084	0.5479	0.577655	1.48762	0.707622	0.759989
8	0.69109	0.610102	0.960356	1.63045	0.699363	0.814104
9	0.545152	0.558289	0.703544	1.69845	0.674287	0.70063
10	0.509373	0.632303	0.65378	1.90804	0.766357	0.831568
11	0.52168	0.708469	0.739311	2.24691	0.841343	1.05522
12	0.593384	0.701811	0.75683	2.03783	0.737827	1.04327
13	0.609954	0.751204	0.891104	1.66667	0.729231	1.34057
14	0.489558	0.619143	0.71302	1.32762	0.683506	0.923895
15	0.549774	0.619308	0.77151	0.997316	0.756891	0.869778
16	0.67479	0.819734	0.815259	1.17723	0.909036	1.05152
17	0.630177	0.745703	0.699363	1.27747	0.874555	0.921663
18	0.521718	0.578509	0.553492	0.97259	0.640947	0.656461
19	0.628506	0.757512	0.636827	1.15581	0.794664	0.79348
20	0.756683	0.883508	0.728465	1.51928	0.985545	0.895294
21	0.679892	0.721258	0.64087	1.42138	0.80034	0.718088
22	0.672852	0.686597	0.591364	1.31324	0.679817	0.640905
23	0.85999	0.928857	0.802627	1.77344	0.975634	0.844898
24	0.942785	0.980288	0.894089	1.99247	1.07661	0.908201
25	0.86867	0.815604	0.7725	1.86783	0.827314	0.767546
26	0.981359	0.914248	0.87159	2.05047	0.934525	0.855103
27	1.23082	1.16707	1.15505	2.51287	1.26132	1.12788
28	1.26371	1.16127	1.1796	2.60353	1.22933	1.15366
29	1.16421	0.915443	0.977829	2.40565	1.00581	0.999628
30	1.14954	0.951932	0.935167	2.35057	1.00816	0.95942
31	1.09567	1.00301	0.915443	2.0566	0.991743	0.947623
32	1.08867	0.966562	0.909371	2.05958	0.928243	0.963178
33	0.944426	0.746627	0.754179	1.87453	0.73223	0.819639
34	0.723843	0.645375	0.611059	1.46354	0.599196	0.652766
35	0.557699	0.502361	0.50654	1.23536	0.498371	0.568104
36	0.49988	0.416461	0.419545	1.00609	0.437572	0.545396
37	0.512495	0.394224	0.382377	1.08506	0.398865	0.5405
38	0.595996	0.444462	0.434011	1.21657	0.440838	0.612146
39	0.730798	0.491452	0.494967	1.54183	0.565432	0.645376
40	0.882303	0.640493	0.593397	1.72276	0.63625	0.985382
41	1.02482	0.65926	0.652962	1.84412	0.712311	0.957541
42	0.885517	0.713064	0.681466	1.59211	0.691562	1.15416
43	1.07989	0.880556	1.0736	1.83862	1.06004	1.95636
44	0.864397	1.09005	0.96399	1.83987	0.874849	1.54102
45	1.02421	1.27642	1.1067	1.72671	1.13654	1.31441
46	1.18626	1.14822	1.46542	1.94401	1.60821	1.74343
47	1.16919	1.01478	1.16852	1.83327	1.36516	1.9737
48	0.893602	0.816251	0.817812	1.59011	0.790577	1.31109
49	0.819515	0.814352	0.777657	1.48456	0.803671	1.24739
50	0.7381	0.777571	0.771872	1.05969	0.766624	1.059
51	0.853098	0.842341	0.953177	1.19964	1.26521	1.27751
52	0.864992	0.949695	1.0291	1.19475	1.90427	1.42157
53	1.09992	1.33896	1.44301	1.57121	2.49846	1.72275
54	1.61999	1.35553	1.81804	1.93804	2.8615	1.8496
55	1.89969	1.36001	1.75009	2.14132	2.74677	1.97328
56	1.16959	1.16045	1.25621	1.63001	1.78313	1.52242
57	1.00986	0.979823	1.06837	1.48464	1.27176	1.27731
58	0.860976	0.884276	0.887549	1.3649	0.887016	1.01275
59	0.781255	0.844558	0.745905	1.45058	0.844878	1.08413
60	0.638351	0.60869	0.563062	1.20892	0.574999	0.860336
61	0.709054	0.619953	0.57607	1.3499	0.622894	0.865918
62	0.678912	0.58821	0.515364	1.38393	0.584314	0.776849
63	0.732816	0.606396	0.533101	1.49539	0.608727	0.833704
64	0.799207	0.63192	0.549246	1.69109	0.659118	0.811813
65	1.03107	0.730115	0.664393	2.02674	0.82105	1.00216
66	1.16369	0.794258	0.747702	2.31669	0.929322	1.06377
67	1.3476	0.902915	0.847337	2.50509	1.05228	1.15781
68	1.10352	0.776013	0.671615	2.21369	0.89657	1.04603
69	1.0717	0.748545	0.65434	2.27215	0.919743	1.07643
70	0.89425	0.671648	0.55986	1.93573	0.757581	0.915963
71	1.02949	0.808844	0.683269	2.16836	0.902998	1.07737
72	1.11023	0.932143	0.836949	2.30927	1.02791	1.24361
73	0.946991	0.829057	0.795268	2.02925	0.911781	1.07141
74	0.95625	0.880876	0.884052	2.05227	0.971314	1.13715
75	0.854862	0.772764	0.801436	1.99406	0.973966	1.07455
76	1.03883	0.842623	0.964746	2.12046	0.975046	1.06492
77	1.03195	0.767375	0.855451	2.10506	0.817591	0.928458
78	1.03093	0.708074	0.768275	2.00606	0.702261	0.816086
79	0.813472	0.573087	0.623441	1.74049	0.615454	0.676848
80	0.708554	0.447665	0.516501	1.49387	0.518451	0.537131
81	0.568134	0.378324	0.455837	1.22566	0.434722	0.432542
82	0.490793	0.351109	0.413099	0.986554	0.409227	0.409896
83	0.488715	0.360273	0.410444	0.998131	0.383754	0.445572
84	0.44658	0.394545	0.451191	0.95138	0.370649	0.593056
85	0.59395	0.424254	0.46949	1.25088	0.451702	0.583675
86	0.674189	0.4434	0.482644	1.49111	0.548161	0.570522
87	0.755698	0.476275	0.466766	1.82259	0.659324	0.632725
88	0.837412	0.523343	0.497804	1.89066	0.680378	0.646831
89	0.848701	0.54331	0.497315	1.8847	0.724679	0.610637
90	1.0998	0.630692	0.598601	2.26444	0.811209	0.797775
91	1.18865	0.597721	0.576474	2.5442	0.895566	0.860741
92	1.20662	0.603071	0.570026	2.59231	0.93087	0.916812
93	0.973648	0.539675	0.469573	2.15315	0.749874	0.801503
94	0.987732	0.522565	0.477922	2.16574	0.729053	0.746226
95	1.15336	0.611315	0.520072	2.52149	0.86446	0.868338
96	1.01666	0.602277	0.492282	2.27188	0.77229	0.905893
97	0.900674	0.542633	0.468251	1.93999	0.630217	0.782573
98	1.19346	0.612467	0.530685	2.28164	0.760261	0.833247
99	1.13989	0.679754	0.568101	2.44392	0.843158	0.985603
100	0.973989	0.617411	0.529621	2.09723	0.714906	0.90835
101	1.00248	0.586497	0.525455	2.04642	0.665871	0.822493
102	1.15727	0.765402	0.725558	2.47653	0.898191	1.08375
103	1.25487	0.817969	0.798726	2.52839	0.94484	1.22231
104	1.09461	0.730478	0.762018	2.25954	0.799848	1.00063
105	1.13833	0.688892	0.753279	2.22556	0.741156	0.884879
106	0.89665	0.537079	0.573777	1.85479	0.576712	0.625386
107	0.785789	0.489025	0.54506	1.71022	0.549547	0.574986
108	0.68029	0.435461	0.446578	1.49796	0.438523	0.48456
109	0.633171	0.43971	0.529472	1.31576	0.511076	0.475783
110	0.603359	0.446613	0.51527	1.27704	0.503032	0.46815
111	0.446377	0.394384	0.511242	1.11313	0.417022	0.493197
112	0.570803	0.448847	0.519769	1.36305	0.484895	0.553296
113	0.578847	0.437957	0.497804	1.63985	0.690688	0.603675
114	0.706576	0.478982	0.536486	2.09559	0.796191	0.670807
115	0.775495	0.509931	0.597867	2.19651	0.814188	0.617084
116	0.761284	0.550524	0.587627	2.0838	0.724941	0.760471
117	0.805317	0.622532	0.728066	2.06186	0.870842	0.949861
118	0.897544	0.76395	0.876578	2.47057	0.858106	1.13281
119	0.87145	0.69515	0.800115	2.50837	0.943701	0.945528
120	0.950327	0.67225	0.763495	2.74586	0.834865	0.880536
121	0.889939	0.540442	0.593014	2.65875	0.900883	0.751494
122	0.884623	0.513147	0.512026	2.4471	0.784916	0.636686
123	1.02471	0.581638	0.578596	2.78064	1.00517	0.874297
124	0.926921	0.519515	0.492505	2.38628	0.869851	0.804986
125	0.83144	0.494796	0.492969	2.26989	0.850155	0.633225
126	1.02216	0.625089	0.593046	2.70505	1.08078	0.789176
127	1.12413	0.649298	0.554518	2.67458	1.06461	0.847385
128	0.933315	0.544442	0.507519	2.39203	1.05806	0.712994
129	1.04015	0.705437	0.643929	2.61701	1.17331	0.876478
130	1.37585	0.836663	0.728743	2.87459	1.27426	1.09862
131	1.06282	0.670687	0.617154	2.64257	1.11643	0.982365
132	0.982958	0.59487	0.768819	2.35888	0.894208	0.936472
133	1.07807	0.692358	1.47522	2.53498	0.926532	1.34439
134	1.07375	0.755024	1.24587	2.40806	1.00332	0.979026
135	1.01266	0.757914	0.843347	2.14052	0.955111	0.972404
136	0.93008	0.704212	0.77417	1.87346	1.02504	0.957153
137	0.752772	0.691887	0.739402	1.89103	0.855065	1.13742
138	0.706231	0.728097	0.731435	1.80453	0.883036	1.17498
139	0.859858	1.00543	1.05766	2.0177	1.03084	1.49789
140	0.659515	0.993108	0.952582	1.79252	0.988577	1.1262
141	0.802592	1.06957	1.09598	1.7064	0.973071	0.920627
142	0.703178	0.859514	0.976988	1.59528	0.842966	0.782269
143	0.761026	0.819914	1.34609	1.58317	0.905868	1.05802
144	1.07579	0.919541	1.27596	1.79713	1.11253	1.42894
145	1.43971	1.98077	1.57238	2.02698	1.28197	1.55512
146	1.70032	1.97919	2.16743	2.55654	1.50211	2.27332
147	1.75501	3.21073	3.50639	2.56146	1.67284	3.35462
148	1.9641	4.40754	3.56701	2.8977	1.92184	4.47574
149	1.99377	5.22211	3.84401	3.45954	2.35031	4.0924
150	1.84169	5.14648	4.11706	3.65837	2.7379	3.47849
151	2.22403	4.37555	4.25757	4.15063	3.81999	3.11392
152	1.89175	3.43472	3.73902	3.30914	4.17047	2.03706
153	1.98932	3.54034	3.70398	4.75905	3.50239	3.33565
154	2.18587	2.77891	2.10963	4.10795	1.9742	3.24954
155	1.38001	2.10079	1.53766	2.06816	1.73176	1.79968
156	0.826392	1.23978	1.2013	2.03674	0.927947	1.27672
157	0.664464	0.84999	0.818232	1.82422	0.70192	0.826262
158	0.715679	0.741788	0.738294	2.06676	0.945155	0.876412
159	0.631939	0.668343	0.725321	1.79268	0.965376	0.722996
160	0.609011	0.602742	0.696157	1.70997	0.907435	0.662909
161	0.692027	0.558159	0.678383	1.99601	0.802529	0.766548
162	0.717201	0.559729	0.72826	1.98219	0.872555	0.932662
163	0.7237	0.66451	0.824577	2.07933	0.987192	0.947162
164	0.870014	0.911288	0.969654	2.70733	1.10948	1.28466
165	1.51844	1.15061	1.49324	3.43629	1.64629	1.82641
166	2.34194	1.60201	2.23189	3.55487	2.51473	2.551
167	3.67318	2.09192	3.36392	4.25789	3.54162	3.56068
168	3.06445	2.26845	3.45502	4.15263	3.21346	3.85538
169	2.63741	2.0786	3.25167	3.59967	3.06179	3.65148
170	1.62484	1.69418	1.66499	3.07412	1.89091	2.37568
171	1.21979	1.12168	1.18511	2.40178	1.46099	1.74208
172	1.1255	0.926144	1.06078	2.56255	1.28799	1.51048
173	0.903084	0.741824	0.855479	2.27783	1.12875	1.25557
174	1.01422	0.769801	0.815635	2.53421	1.15972	1.44619
175	1.15422	0.877487	0.871856	3.01423	1.45629	1.61423
176	1.40231	0.998887	0.968287	3.15049	1.51747	1.70889
177	1.43347	0.981449	0.995695	2.92436	1.48583	1.90233
178	1.41356	1.0209	0.934195	2.89972	1.42322	1.68832
179	1.59836	0.854692	0.764268	2.8115	1.46585	1.82007
180	1.72669	0.916746	0.755582	2.60411	1.42618	1.48692
181	1.43053	0.945507	0.936539	2.4085	1.19061	1.32417
182	1.68037	0.826283	0.823745	2.42063	1.03612	1.49484
183	1.11435	0.837425	0.87496	2.13778	0.959178	1.42309
184	0.93831	0.858782	1.05715	2.11379	0.871068	1.65437
185	0.726213	0.812728	0.957109	2.07804	0.861324	1.59696
186	0.808284	0.887769	1.12978	2.24599	1.03141	1.41763
187	0.69074	0.70782	0.94528	1.99805	0.91696	1.07619
188	0.571163	0.590197	0.770154	1.79539	0.696523	0.846801
189	0.515229	0.620043	0.758974	1.70623	0.686396	0.612384
190	0.497031	0.64063	0.740724	1.5925	0.653059	0.569587
191	0.570104	0.682399	0.73925	1.66699	0.614939	0.599888
192	0.744142	1.03414	0.935749	1.98833	0.84448	0.898409
193	0.904738	1.09645	0.974888	2.43651	1.05882	1.1089
194	1.00141	1.12909	1.03536	2.44805	1.12117	1.32415
195	0.904887	0.990594	0.9166	1.98409	0.988338	1.15864
196	0.813567	1.06921	0.748162	2.19389	0.986934	0.998801
197	1.00651	1.20627	0.851514	2.78048	1.25768	1.34216
198	1.11995	1.0594	0.983148	2.70726	1.28629	1.55303
199	1.01439	0.9159	1.21412	2.3297	1.20374	1.41479
200	1.06101	1.23259	1.41893	2.635	1.48799	1.49151
201	1.31337	1.51154	1.68836	3.00644	2.02006	2.08199
202	1.66358	2.13879	1.85279	3.90264	2.69408	2.07016
203	1.44486	2.68475	1.93034	5.58263	3.17545	1.6659
204	1.6336	3.19052	2.41736	7.13383	3.84131	2.71244
205	2.04078	3.04081	2.39629	9.55158	3.48314	3.31466
206	3.07394	2.57704	2.36001	11.4909	3.33398	4.39107
207	4.18283	2.30931	2.02072	13.2384	3.98548	4.25866
208	4.33077	1.75807	1.28428	15.967	4.42598	2.80032
209	5.12265	1.9927	1.59667	16.9002	4.37034	2.75588
210	6.57301	2.37294	1.25192	16.4263	4.98111	2.92658
211	6.86025	3.12624	1.78146	17.4393	5.42731	3.26128
212	7.57834	2.52161	1.89498	17.8887	4.42297	3.92931
213	8.78812	2.2833	1.80914	18.2119	4.92479	5.13597
214	9.19215	3.84441	2.59833	18.7885	7.05023	5.39003
215	10.1746	5.33612	3.37235	19.7215	9.22415	6.66401
Average RMSF	1.2738	1.04993	1.03033	2.84929	1.28857	1.33809

## Sheet: Dihydrofolate reductase
	CHEMBL1966988	CHEMBL340488	ZINC000016682862	ZINC000828645375	CHEMBL3901573
0	8.34698	9.36974	9.71844	10.3399	10.5857
1	6.84907	8.1098	8.8755	9.87847	9.93418
2	5.71291	8.13385	8.20483	9.11103	9.48588
3	4.75945	6.83833	6.56309	9.44783	8.76818
4	4.1153	4.99251	5.24597	7.82153	6.61404
5	3.81437	4.46203	4.34595	7.12162	7.84975
6	3.34353	3.73206	2.96828	5.30404	6.58516
7	2.81725	3.26032	2.48389	4.69655	5.35216
8	2.57264	3.2419	2.30533	4.87755	5.3832
9	2.35061	2.92122	1.97997	4.19511	4.1903
10	1.94178	2.54433	1.63869	2.7006	2.83567
11	1.66596	2.49294	1.55548	2.52101	3.66593
12	1.44561	2.39101	1.34011	3.16321	2.07851
13	1.23142	2.34293	1.08273	3.24085	1.64053
14	1.2767	2.41586	1.40364	2.5846	1.76498
15	1.17626	2.30763	1.39464	2.45419	1.72322
16	0.945142	1.34274	1.04717	1.61587	1.48084
17	0.833387	1.09556	0.812738	1.57447	1.45962
18	0.746358	0.928769	0.781166	1.38211	1.27769
19	0.761856	0.986988	0.873896	1.49675	1.29654
20	1.00186	1.24978	1.15571	1.77094	1.44089
21	1.10411	1.28171	1.20905	1.78802	1.57474
22	0.782611	0.924237	0.912521	1.38761	1.24824
23	0.620319	0.691451	0.709741	1.04142	0.963908
24	0.529062	0.599243	0.593045	0.925226	0.850107
25	0.507977	0.466019	0.477524	0.699284	0.647153
26	0.486711	0.473593	0.433599	0.656949	0.610958
27	0.451888	0.458367	0.411646	0.542522	0.533748
28	0.458309	0.474443	0.387611	0.566128	0.524592
29	0.440655	0.476714	0.396303	0.654988	0.548732
30	0.512549	0.595647	0.44219	0.851949	0.730374
31	0.765803	0.720113	0.602673	1.15066	0.975175
32	0.982598	0.954559	0.800982	1.40043	1.36422
33	0.913606	0.780999	0.68759	1.26746	1.26743
34	0.683006	0.639352	0.533491	0.950964	0.910386
35	0.736994	0.662448	0.536951	0.874186	1.05627
36	0.748732	0.657952	0.525064	0.71674	1.02613
37	1.00987	0.754869	0.76182	1.0014	1.37478
38	1.21996	1.13968	0.970239	1.56662	1.67938
39	1.68797	1.50578	1.41697	2.08716	2.16543
40	1.69129	1.44081	1.74318	1.8271	2.36889
41	1.24053	1.14635	1.21704	1.54366	1.96458
42	0.939884	0.913081	0.947051	1.1765	1.37343
43	0.776152	0.880681	0.892878	1.27222	1.24534
44	0.800842	0.892478	0.747273	1.10032	1.19622
45	1.14922	1.07814	1.01322	1.13143	1.41977
46	1.28438	1.10829	1.22886	1.10387	1.41851
47	1.13415	0.946689	1.20691	0.974541	1.30759
48	1.23376	1.1471	1.82231	1.20717	1.64552
49	1.27329	0.83826	0.834307	1.22704	1.40206
50	1.61684	0.778096	0.817164	1.01448	1.08045
51	1.2689	0.872175	0.865987	1.04601	1.23263
52	1.09211	0.875984	0.843121	1.23704	1.38067
53	0.872359	0.759373	0.701911	1.17159	1.13769
54	0.967854	0.781549	0.706993	1.06052	1.03375
55	1.0084	0.878585	0.902209	1.24989	1.24727
56	0.870372	0.978599	0.913368	1.42417	1.33257
57	0.753057	0.880189	0.796133	1.2974	1.14974
58	0.821045	0.869493	0.889981	1.27368	1.14072
59	0.955835	1.07655	1.10914	1.52338	1.44593
60	0.98443	1.15159	1.12218	1.6478	1.57695
61	0.946018	1.10023	1.10202	1.60598	1.6333
62	1.16356	1.28609	1.22399	1.78099	1.91846
63	1.06641	1.18171	1.02906	1.6402	1.59683
64	0.95584	1.03603	0.818518	1.33497	1.41809
65	0.686336	0.720195	0.656784	1.1089	1.05902
66	0.596056	0.571772	0.545909	0.830955	0.823105
67	0.470073	0.45331	0.426	0.666271	0.713791
68	0.619684	0.570382	0.515943	0.572602	0.849565
69	0.769671	0.729688	0.656159	0.910719	1.02461
70	0.950501	1.00364	0.860847	1.14882	1.22862
71	1.06505	0.993937	1.00509	1.28428	1.508
72	0.898362	0.791565	0.857646	0.970562	1.37866
73	1.06396	0.9442	0.971339	0.883338	1.35185
74	1.22747	1.19533	1.30267	1.08222	1.69252
75	1.20851	1.0693	1.14162	1.21233	1.96605
76	1.14865	0.955492	0.900645	1.23278	1.91504
77	1.92238	1.36018	0.962538	1.41402	1.7315
78	1.20416	1.08035	0.896081	1.26102	1.35302
79	1.34994	1.12215	1.2183	1.61641	1.7713
80	1.29534	1.21914	1.35446	1.73058	1.63971
81	0.876908	0.962977	0.962433	1.35446	1.21602
82	0.794431	0.913247	0.848299	1.3433	1.14229
83	0.634423	0.820344	0.734038	1.13377	0.959786
84	0.544776	0.562582	0.550796	0.928671	0.821511
85	0.620941	0.680635	0.628628	0.915942	0.901754
86	0.775938	0.809551	0.696474	0.975347	0.979708
87	1.12205	1.1388	0.962711	1.35999	1.35684
88	1.54717	1.72507	1.33955	1.98249	1.72737
89	1.61666	1.88535	1.52579	2.07468	1.83183
90	1.68409	1.8895	1.48308	2.12795	1.80693
91	1.38493	1.73052	1.41541	2.01052	1.599
92	1.29596	1.8689	1.53714	2.11443	1.67555
93	1.04232	1.68098	1.32739	1.86062	1.49804
94	1.29437	1.91512	1.76091	2.02426	1.67626
95	1.5669	2.11	2.08687	2.22198	1.89074
96	1.06625	1.47764	1.20727	1.71597	1.37978
97	0.77553	1.1458	0.932371	1.36721	1.11403
98	0.715404	0.837207	0.769522	1.3093	1.04259
99	0.740129	0.782554	0.715463	1.26556	1.04514
100	0.807863	0.812079	0.685272	1.18561	1.10319
101	1.042	1.24019	0.856479	1.34278	1.32936
102	0.977481	0.982163	0.934226	1.1771	1.11416
103	0.825641	0.901405	0.820935	0.956838	0.996332
104	0.981139	1.04861	0.969196	1.12358	1.18807
105	0.93151	0.87237	0.839649	1.10692	1.14578
106	0.72193	0.695732	0.655509	0.920333	0.986761
107	0.798294	0.807727	0.781418	1.01134	1.05843
108	0.95362	0.986515	0.912513	1.21832	1.21376
109	0.863222	0.899845	0.84501	1.16321	1.23514
110	0.808885	0.807596	0.810467	1.10237	1.17464
111	1.1027	1.15226	1.22029	1.46785	1.73351
112	1.35474	1.41062	1.40859	1.74116	2.04066
113	1.02497	1.1275	1.02349	1.42273	1.47843
114	0.872462	0.950245	0.843542	1.28216	1.29331
115	0.605694	0.652402	0.661642	0.96382	0.968746
116	0.511936	0.550268	0.558686	0.812525	0.805332
117	0.448104	0.45116	0.443959	0.591189	0.648046
118	0.523778	0.443873	0.475796	0.572276	0.714288
119	0.750741	0.57271	0.533373	0.645192	0.675694
120	0.687739	0.759236	0.58752	0.71723	0.724831
121	0.740907	0.910029	0.681513	0.801716	0.879001
122	0.778028	1.15387	0.79071	0.937371	1.02896
123	0.607413	0.954019	0.615601	0.730263	0.750371
124	0.536845	0.747204	0.549045	0.679859	0.649892
125	0.659351	0.902735	0.730347	0.937936	0.954146
126	0.658845	0.846318	0.737854	0.941554	1.04455
127	0.594661	0.677864	0.687166	0.840686	0.881029
128	0.650764	0.715887	0.73434	0.980939	0.925779
129	0.788273	0.892831	0.875217	1.1825	1.1798
130	0.789898	0.875304	0.851846	1.17333	1.19835
131	0.810573	0.921263	0.907251	1.31439	1.22122
132	0.611353	0.719431	0.701222	1.09429	0.997113
133	0.607231	0.677981	0.616218	1.08998	0.969709
134	0.584074	0.521501	0.55625	0.881921	0.804837
135	0.575564	0.503782	0.527847	0.889516	0.754576
136	0.56655	0.510571	0.562607	0.785555	0.655829
137	0.515939	0.551439	0.582186	0.828813	0.637577
138	0.511201	0.555012	0.556778	0.930778	0.633048
139	0.52868	0.616587	0.471204	0.919472	0.636526
140	0.743842	0.759353	0.566316	1.13411	0.798268
141	0.909451	0.861347	0.645419	1.21046	1.03714
142	1.37927	1.11086	1.08297	1.49477	1.13633
143	2.43054	1.60324	1.54017	1.90345	1.58301
144	2.01002	1.69828	1.5784	1.85544	1.67497
145	1.30521	1.29245	1.10895	1.44575	1.25768
146	1.28175	1.12377	0.987354	1.53645	1.4789
147	1.18632	0.994704	0.902858	1.42235	1.52966
148	1.40451	1.14317	1.03962	1.62722	1.93292
149	1.20732	0.888714	0.82931	1.10736	1.61063
150	0.946688	0.781271	0.69131	0.984059	1.28102
151	0.702807	0.591497	0.578107	0.813064	0.884318
152	0.892946	0.667358	0.742338	1.06453	1.16058
153	1.01143	0.78833	0.898937	1.21888	1.23001
154	1.36087	1.09527	1.43264	1.55038	1.82509
155	1.34892	1.12216	1.37095	1.68811	1.79632
156	1.44415	1.27752	1.64917	1.83858	1.9059
157	1.20999	1.16928	1.54414	1.71626	1.60913
158	0.932935	0.943747	1.15057	1.59835	1.29884
159	1.12867	1.05854	1.18877	1.7575	1.55658
160	1.15205	1.06792	1.13636	1.77911	1.79142
161	0.878999	0.749454	0.826907	1.44462	1.30069
162	0.930584	0.774231	0.826771	1.53706	1.31628
163	0.870825	0.767786	0.764525	1.54905	1.27476
164	0.878999	0.85211	0.800276	1.54702	1.32751
165	0.875048	0.894371	0.800555	1.50446	1.31107
166	1.12328	1.21196	1.04062	1.83442	1.64009
167	1.1208	1.20619	1.05092	1.7969	1.7936
168	0.999603	1.03359	0.953786	1.63017	1.62796
169	1.14499	1.15333	1.10203	1.79864	1.68859
170	1.41516	1.26149	1.33476	2.00522	2.02438
171	1.76584	1.5835	1.68785	2.08924	2.18805
172	1.78219	1.74083	1.77789	2.07834	2.08868
173	2.28405	1.95962	2.08589	2.37077	2.45618
174	2.21556	1.83245	2.03195	2.11497	2.18319
175	2.4289	1.86099	2.31789	2.3884	2.50523
176	2.60381	1.76314	2.14158	2.40105	2.53017
177	2.73935	1.96052	2.25937	2.64114	2.68448
178	2.29515	1.86423	2.10945	2.23326	2.30557
179	1.68878	1.51219	1.57678	1.89049	1.84957
180	1.27168	1.33074	1.23675	1.78233	1.71723
181	1.36042	1.21879	1.04464	1.76041	1.63764
182	1.52627	1.35928	1.0791	1.9139	1.76937
183	1.56506	1.37616	1.17978	2.23809	1.86302
184	1.28463	1.17405	1.0589	1.97916	1.68188
185	0.920035	0.937642	0.810752	1.56771	1.23994
186	0.834338	0.937831	0.788686	1.37194	1.21388
187	0.953938	1.01918	0.872879	1.3395	1.26831
188	1.05287	1.00317	0.972577	1.20085	1.349
189	1.42667	1.07552	1.17631	1.17619	1.45059
190	1.5791	1.12704	1.12457	1.3492	1.36878
191	1.1394	0.870625	0.739231	1.11606	1.02514
192	0.846118	0.846241	0.686104	1.19415	0.927167
193	0.620384	0.711092	0.581138	1.10429	0.798691
194	0.63347	0.67752	0.59251	1.18396	0.902978
195	0.648935	0.619106	0.582447	1.14035	0.894354
196	0.666438	0.595013	0.590898	1.13567	0.940985
197	0.708846	0.625243	0.668833	1.17475	1.02781
198	0.760298	0.699291	0.749261	1.27815	1.10077
199	0.893535	0.873942	0.842216	1.4749	1.21019
200	1.20291	1.1961	1.1149	1.7003	1.42397
Average RMSF	1.2111	1.26719	1.18451	1.67443	1.65433

## Sheet: Methionine aminopeptidase 2 
	CHEMBL3913373	CHEMBL1962731	CHEMBL3142997	ZINC000199197855	ZINC000016682972	MAP2
0	0.65795	0.633084	0.793676	0.774747	0.698218	0.777083
1	0.55475	0.544411	0.667869	0.706048	0.544276	0.672521
2	0.565759	0.702369	0.667151	0.781947	0.633661	0.64523
3	0.625367	0.658691	0.566705	0.580602	0.589351	0.576889
4	0.844938	0.856428	0.574631	0.615795	0.869929	0.684665
5	0.875647	0.986321	0.742348	0.694498	1.09875	0.679551
6	1.10924	0.767672	0.826406	0.590753	1.48854	0.623995
7	1.18347	1.01236	1.2123	0.790291	1.71231	0.977225
8	0.896568	1.49043	1.52024	0.695391	1.02327	1.09379
9	0.748862	1.19349	1.0915	0.522918	0.683856	1.00251
10	0.727739	0.731641	0.827	0.551744	0.633299	0.906381
11	0.51769	0.492281	0.584275	0.497562	0.540854	0.644521
12	0.545778	0.506203	0.517399	0.553223	0.572765	0.619794
13	0.484749	0.433294	0.443424	0.507345	0.520489	0.550319
14	0.482671	0.436111	0.431179	0.49788	0.514429	0.473674
15	0.905925	0.702402	0.705399	0.882386	0.739303	0.864488
16	1.8723	1.83801	1.90267	1.7582	1.00548	1.71459
17	3.04208	3.01474	3.0375	2.98882	1.18315	2.95799
18	2.95189	2.61606	2.5891	2.66866	1.0191	2.68867
19	2.20523	1.57436	1.56697	1.98409	0.999028	2.09484
20	2.00881	1.54289	1.66943	1.83745	1.21618	1.97184
21	1.72683	1.29923	2.07453	1.53583	1.09395	1.60959
22	1.18519	1.36105	1.96047	1.068	0.865355	1.05315
23	1.12131	1.45439	2.2844	1.12552	0.99455	1.26449
24	0.809999	0.855254	1.76285	0.831499	0.754601	0.915558
25	0.763716	0.702163	0.775599	0.804647	0.657353	0.777086
26	0.619643	0.567729	0.569861	0.639457	0.563113	0.583872
27	0.627572	0.514194	0.461296	0.506035	0.513797	0.58868
28	0.619726	0.495818	0.492757	0.521569	0.490254	0.635382
29	0.512186	0.44197	0.41296	0.498433	0.4554	0.492503
30	0.495158	0.423069	0.371128	0.421733	0.414351	0.425298
31	0.46902	0.42575	0.370609	0.419855	0.412954	0.421598
32	0.440373	0.402482	0.359755	0.401088	0.428849	0.397411
33	0.432197	0.400886	0.362589	0.389652	0.406423	0.352979
34	0.390321	0.36703	0.334709	0.370263	0.394122	0.35356
35	0.383305	0.411553	0.366054	0.378591	0.413819	0.401251
36	0.365473	0.406492	0.356547	0.376337	0.423756	0.408828
37	0.384846	0.364474	0.320463	0.34627	0.382945	0.340298
38	0.405832	0.370477	0.367817	0.360037	0.415623	0.487812
39	0.469455	0.429658	0.410279	0.390797	0.415985	0.554281
40	0.437488	0.402478	0.364289	0.386219	0.382399	0.403258
41	0.463291	0.44643	0.401792	0.346751	0.418135	0.383454
42	0.480288	0.525303	0.453419	0.398961	0.468473	0.426473
43	0.465104	0.504903	0.459518	0.426055	0.440248	0.435222
44	0.4513	0.456989	0.458197	0.401545	0.418611	0.408304
45	0.527809	0.497826	0.492148	0.432796	0.461657	0.439171
46	0.663772	0.616808	0.635085	0.555917	0.581316	0.553091
47	0.59523	0.587203	0.651929	0.573532	0.568607	0.593833
48	0.497238	0.499872	0.630161	0.515878	0.509484	0.540883
49	0.65847	0.529862	0.723442	0.645967	0.623044	0.569438
50	0.6901	0.5504	0.703324	0.676176	0.632604	0.592523
51	0.879885	0.765616	0.874471	0.863909	0.79882	0.737999
52	0.983423	0.811462	0.896736	1.05565	0.828294	0.843764
53	0.650303	0.58442	0.826862	0.85919	0.646279	0.722997
54	0.589233	0.54512	0.536915	0.629132	0.602159	0.764176
55	0.543656	0.58051	0.602192	0.576758	0.651192	0.613772
56	0.621005	0.57502	0.680382	0.630126	0.682561	0.702442
57	0.576628	0.535492	0.574081	0.530432	0.594763	0.660162
58	0.560788	0.563722	0.542331	0.44668	0.63384	0.528599
59	0.49327	0.537771	0.519226	0.454221	0.629829	0.519602
60	0.472735	0.445342	0.472639	0.440593	0.51655	0.516479
61	0.410774	0.383081	0.384874	0.382306	0.451552	0.438131
62	0.41126	0.402768	0.431898	0.390657	0.551143	0.443758
63	0.461721	0.439008	0.486319	0.437691	0.630783	0.481158
64	0.4505	0.380805	0.402549	0.42052	0.508983	0.477297
65	0.410036	0.353567	0.372165	0.383758	0.44522	0.431092
66	0.46883	0.419775	0.458771	0.450433	0.52682	0.470751
67	0.489701	0.433561	0.454178	0.45905	0.562729	0.506399
68	0.409233	0.384611	0.37635	0.413853	0.470232	0.503605
69	0.390164	0.369424	0.370353	0.431622	0.459743	0.478725
70	0.504037	0.446206	0.458491	0.537732	0.629559	0.624432
71	0.542148	0.549834	0.548421	0.595359	0.624901	0.649651
72	0.419161	0.427532	0.399626	0.482833	0.498136	0.46777
73	0.408439	0.419756	0.408223	0.439178	0.548733	0.451564
74	0.436097	0.427433	0.450059	0.4482	0.564034	0.471126
75	0.470955	0.433373	0.417335	0.523869	0.776174	0.616086
76	0.403503	0.429725	0.385821	0.428487	0.5359	0.411175
77	0.385106	0.40196	0.392183	0.381738	0.428363	0.411261
78	0.491898	0.496119	0.444838	0.428513	0.462873	0.497572
79	0.464711	0.426088	0.500513	0.428621	0.477037	0.633126
80	0.45084	0.393196	0.470588	0.39973	0.498143	0.511164
81	0.401198	0.397708	0.440384	0.386628	0.443173	0.413157
82	0.540827	0.452612	0.495878	0.445083	0.576968	0.479361
83	0.448273	0.424519	0.400242	0.390708	0.454361	0.375654
84	0.426959	0.413335	0.379555	0.396062	0.438179	0.346057
85	0.457687	0.447347	0.452993	0.43258	0.456211	0.433362
86	0.469687	0.421944	0.449025	0.395339	0.450881	0.433818
87	0.518344	0.455754	0.443854	0.414478	0.451648	0.444822
88	0.552973	0.476046	0.425629	0.452959	0.493672	0.431899
89	0.661617	0.561836	0.43744	0.483059	0.544829	0.482401
90	0.61198	0.522066	0.434532	0.440153	0.50092	0.444604
91	0.501291	0.451443	0.431257	0.453467	0.569937	0.508724
92	0.484378	0.419428	0.449781	0.456237	0.511013	0.473136
93	0.484842	0.562145	0.464694	0.43953	0.777922	0.536326
94	0.624514	0.748443	0.567966	0.515088	0.83066	0.712987
95	0.987143	1.06058	0.785618	0.637725	1.08964	0.77972
96	1.16564	1.21064	1.06842	0.890222	1.22522	0.968521
97	1.10538	1.2986	1.24837	0.954462	1.11863	0.894542
98	0.849141	1.12073	0.876524	0.794289	0.922675	0.828928
99	0.819876	0.996674	0.900288	0.885713	0.878713	0.882992
100	0.681013	0.730025	0.944545	0.853702	0.731696	0.768218
101	0.64921	0.673517	0.716753	0.713516	0.684137	0.717244
102	0.771609	0.676324	0.697756	0.693158	0.695439	0.703053
103	0.62695	0.567367	0.648891	0.547936	0.576793	0.56241
104	0.770665	0.669023	0.732821	0.588527	0.662671	0.644304
105	0.960852	0.608115	0.984435	0.614192	0.678278	0.772292
106	0.683394	0.530233	0.816747	0.556544	0.598047	0.64503
107	0.591415	0.512448	0.574918	0.483157	0.533432	0.559026
108	0.450716	0.381603	0.499467	0.392266	0.405256	0.435727
109	0.423946	0.378275	0.602965	0.386497	0.377749	0.378972
110	0.433685	0.378655	0.546102	0.388385	0.375615	0.338711
111	0.495217	0.407073	0.529938	0.364498	0.458614	0.389724
112	0.702056	0.91876	0.556722	0.367181	0.579357	0.410004
113	0.458154	0.732917	0.466865	0.361125	0.495296	0.372962
114	0.48858	0.806238	0.42776	0.389214	0.557918	0.457692
115	0.41848	0.465876	0.330019	0.350936	0.414559	0.338781
116	0.416632	0.430496	0.322943	0.371436	0.423011	0.342133
117	0.445866	0.442043	0.345387	0.425761	0.432633	0.391062
118	0.506314	0.457575	0.428474	0.504439	0.487451	0.458403
119	0.493204	0.463326	0.435036	0.478186	0.494115	0.434526
120	0.465435	0.461347	0.39604	0.425916	0.444833	0.396458
121	0.506266	0.418689	0.415278	0.39695	0.448661	0.407045
122	0.408912	0.378325	0.43819	0.359396	0.402091	0.353881
123	0.60974	0.445134	0.532066	0.383962	0.538223	0.50476
124	0.453451	0.362176	0.64048	0.37344	0.513683	0.466277
125	0.390735	0.371024	0.853621	0.384645	0.564719	0.351693
126	0.386521	0.345251	0.727592	0.354444	0.456732	0.344993
127	0.372855	0.320189	0.570137	0.364463	0.375836	0.325465
128	0.443893	0.412093	0.707074	0.495158	0.424184	0.494648
129	0.457404	0.39687	0.594523	0.457989	0.438468	0.6456
130	0.545915	0.474532	0.731107	0.581318	0.523354	0.591772
131	0.542377	0.529585	0.722147	0.652579	0.579594	0.614552
132	0.635947	0.62461	0.754256	0.677818	0.637311	0.66197
133	0.711256	0.623862	0.87019	0.679665	0.681004	0.648946
134	0.57266	0.498291	0.748037	0.551788	0.575138	0.595605
135	0.510338	0.504184	0.682767	0.537699	0.539215	0.559481
136	0.485751	0.493013	0.613801	0.483109	0.548078	0.486086
137	0.415739	0.408436	0.536247	0.448704	0.516631	0.426007
138	0.418917	0.385378	0.51822	0.454951	0.514147	0.438059
139	0.462968	0.42786	0.48474	0.444265	0.536282	0.462134
140	0.450269	0.433396	0.454084	0.414231	0.551932	0.465271
141	0.41984	0.40325	0.453599	0.428802	0.537918	0.425894
142	0.425472	0.394891	0.519202	0.458061	0.540502	0.422725
143	0.428397	0.44498	0.527021	0.437447	0.530505	0.468596
144	0.442156	0.45198	0.5201	0.481771	0.513234	0.462837
145	0.452943	0.408873	0.442743	0.483999	0.578196	0.439073
146	0.50044	0.445179	0.596463	0.474431	0.594712	0.456162
147	0.46232	0.463798	0.643556	0.521716	0.553725	0.487366
148	0.530643	0.491011	0.524773	0.580324	0.552425	0.482549
149	0.545601	0.492789	0.524342	0.551784	0.620474	0.482262
150	0.596836	0.578794	0.640225	0.620908	0.685096	0.573272
151	0.571119	0.597617	0.609	0.604059	0.655938	0.579386
152	0.626835	0.61707	0.569339	0.586888	0.656862	0.581455
153	0.671336	0.68224	0.635259	0.660323	0.72471	0.667708
154	0.764508	0.721368	0.694146	0.719043	0.736203	0.699801
155	0.739941	0.804767	0.720206	0.721451	0.92642	0.761511
156	0.734794	0.797491	0.717924	0.670236	0.852752	0.693944
157	0.856944	0.820981	0.713069	0.686123	0.846965	0.667941
158	0.669529	0.711149	0.577422	0.603518	0.74213	0.559772
159	0.820372	0.749937	0.582815	0.711136	0.830097	0.751039
160	0.774536	0.791923	0.622184	0.740804	0.841688	0.660393
161	0.639571	0.659747	0.530939	0.623518	0.755468	0.530297
162	0.611884	0.631883	0.507687	0.597748	0.735684	0.597687
163	0.638795	0.684628	0.559169	0.672137	0.82845	0.671517
164	0.66285	0.692575	0.58391	0.648183	0.807397	0.651781
165	0.636028	0.643002	0.551819	0.519692	0.741924	0.533175
166	0.63076	0.684755	0.556519	0.614421	0.779864	0.649056
167	0.621409	0.692414	0.601747	0.673451	0.715292	0.704205
168	0.535113	0.581516	0.558232	0.573402	0.606682	0.614404
169	0.598606	0.649921	0.536585	0.578994	0.826555	0.590106
170	0.620786	0.764317	0.605921	0.660691	0.958401	0.69374
171	0.654632	0.774053	0.666436	0.692163	0.932903	0.729532
172	0.582726	0.641385	0.666876	0.66836	0.814807	0.584902
173	0.769306	0.647685	0.836566	0.813895	0.798726	0.692147
174	0.823437	0.688377	0.918094	0.791561	0.769354	0.653586
175	1.02487	0.984048	1.42233	1.09992	1.0017	0.682682
176	1.19476	1.40239	2.03732	1.85425	1.19649	0.666984
177	1.73312	1.94357	3.01414	2.91223	1.5951	0.793157
178	1.82336	2.23794	3.23401	2.99031	1.83749	0.899004
179	1.59543	1.65723	2.54331	2.25148	1.49788	0.880245
180	1.4008	1.52718	1.99549	1.75451	1.30983	0.830818
181	1.02001	1.08992	1.22148	1.05972	1.03582	0.69935
182	0.972252	1.13933	1.50886	1.52245	1.03638	0.666248
183	0.715944	0.853561	1.12964	1.17839	0.819115	0.600677
184	0.487166	0.49864	0.513043	0.597501	0.560917	0.521452
185	0.521856	0.76931	0.527606	0.743934	0.654319	0.565866
186	0.550551	0.736075	0.427462	0.553749	0.776381	0.538844
187	0.629123	0.72685	0.454213	0.545444	0.758883	0.586396
188	0.836244	0.961622	0.77341	0.748207	1.06568	0.896316
189	0.681273	0.757611	0.645016	0.990113	0.921479	0.741352
190	0.557682	0.579313	0.583621	0.82784	0.732871	0.515217
191	0.814627	0.59524	0.509367	0.660409	0.922427	0.467933
192	0.533359	0.546625	0.501085	0.610238	0.675233	0.466848
193	0.506916	0.46361	0.444762	0.513566	0.705241	0.463728
194	0.625646	0.477063	0.492561	0.504441	0.651343	0.48675
195	0.794271	0.652799	0.501984	0.47657	0.707354	0.45597
196	0.8085	0.87911	0.558499	0.590369	0.62373	0.51089
197	0.589643	0.506693	0.527507	0.516796	0.544087	0.457487
198	0.588446	0.524628	0.57606	0.492669	0.565133	0.475209
199	0.663746	0.679496	0.617375	0.570818	0.64526	0.531963
200	0.715183	0.856637	0.806966	0.491158	0.718447	0.642519
201	1.24209	0.904971	1.11194	0.691846	1.06258	0.66862
202	2.02465	1.59146	0.710724	0.852952	1.11764	0.735634
203	1.28491	1.23903	0.720483	0.968549	1.54005	0.857612
204	0.645867	0.770479	0.608604	0.701988	0.867819	0.63216
205	0.625835	0.704801	0.543934	0.674764	0.803355	0.641747
206	0.604476	0.697235	0.528363	0.610686	0.868145	0.621496
207	0.638248	0.935549	0.56366	0.715299	0.988267	0.721875
208	0.798646	0.760645	0.557492	0.847266	0.94816	0.711952
209	0.838951	0.994371	0.604811	0.78459	0.963139	0.822828
210	0.944359	1.25737	0.661437	0.767877	1.10753	1.01044
211	0.856395	1.33625	0.783489	1.05691	1.41912	1.31195
212	0.941045	1.52074	0.880909	1.18132	1.50171	1.44702
213	0.825018	1.18859	0.78475	1.08246	1.23917	1.08843
214	1.04929	1.20145	0.969928	1.42165	1.46056	1.21969
215	0.827691	0.83939	0.718547	0.890031	1.0492	0.791696
216	0.861961	0.769459	0.724642	0.85463	1.01389	0.695562
217	0.695354	0.707303	0.645668	0.652503	0.827618	0.656702
218	0.719221	0.784282	0.723196	0.74086	0.932287	0.771255
219	0.601233	0.630911	0.616694	0.662159	0.800184	0.599396
220	0.53687	0.57588	0.584437	0.593457	0.703173	0.57232
221	0.44327	0.451445	0.471708	0.435744	0.535803	0.434089
222	0.492523	0.446487	0.522717	0.451317	0.512052	0.45821
223	0.527823	0.380574	0.444408	0.412033	0.618824	0.440972
224	0.491537	0.430379	0.445495	0.568332	0.5312	0.373701
225	0.458899	0.419985	0.401316	0.614402	0.726825	0.357836
226	0.465826	0.434145	0.359364	0.770201	0.539763	0.394344
227	0.483209	0.439482	0.350992	0.530603	0.593415	0.405933
228	0.48064	0.467352	0.407942	0.469082	0.599632	0.45089
229	0.424022	0.438192	0.378576	0.429241	0.439958	0.43644
230	0.442566	0.498442	0.430017	0.462013	0.504823	0.463052
231	0.520616	0.63	0.509432	0.502555	0.545093	0.514451
232	0.663183	0.736869	0.593174	0.596105	0.702181	0.678059
233	0.720124	0.792357	0.680924	0.743892	0.722349	0.7786
234	0.733245	0.850224	0.727458	0.894065	0.760739	0.921165
235	0.887085	0.769983	0.708174	0.837207	0.715426	0.832875
236	0.829532	0.839703	0.749097	1.3032	0.945528	1.06754
237	0.75737	0.817734	0.731441	0.992201	0.879172	0.921215
238	0.913645	0.860984	0.748725	1.32596	1.06999	1.05948
239	1.35586	0.981599	0.902511	1.2247	1.4383	0.945056
240	1.2085	0.844196	0.766126	1.02159	1.2921	0.718146
241	0.656454	0.577726	0.541182	0.729622	0.78428	0.555629
242	0.531566	0.569633	0.592153	0.63329	0.887701	0.530835
243	0.516567	0.438818	0.509895	0.532324	0.714976	0.522888
244	0.440876	0.43741	0.452434	0.491362	0.580079	0.510555
245	0.478782	0.522646	0.478374	0.566267	0.708716	0.55724
246	0.501477	0.547153	0.502574	0.717534	0.872525	0.59602
247	0.748027	0.790091	0.674054	1.02995	1.15272	0.83033
248	1.48527	0.978277	0.983945	2.21066	1.40643	1.44779
249	1.62772	1.16378	1.27762	2.43918	1.40477	2.01926
250	1.55734	1.2426	1.25904	1.80661	1.49038	2.16943
251	2.56523	2.03596	2.12265	2.88365	2.40221	3.26758
252	1.7782	1.45792	1.55577	2.21535	1.7629	2.25981
253	1.70346	1.32886	1.47606	2.13233	1.72245	1.78572
254	1.19358	0.967071	1.11205	1.59109	1.3647	1.21402
255	1.52855	1.33375	1.43173	2.10982	1.84255	1.70908
256	1.26715	0.981529	1.15792	1.81393	1.59375	1.56498
257	1.24976	0.938357	1.03009	1.73027	1.4687	1.62416
258	1.10319	0.831814	0.893778	1.57361	1.35802	1.57436
259	0.812873	0.664054	0.735188	1.08297	1.05114	1.14362
260	0.794258	0.653619	0.704105	1.01349	0.862175	0.969509
261	0.82014	0.653197	0.649013	1.00039	0.911603	1.10495
262	0.65971	0.533075	0.525531	0.738798	0.753142	0.928426
263	0.55409	0.489196	0.506384	0.57445	0.645839	0.671916
264	0.618425	0.542038	0.515762	0.679583	0.73892	0.725298
265	0.570311	0.507316	0.477136	0.599384	0.757746	0.726475
266	0.49201	0.471802	0.451355	0.539533	0.677373	0.597071
267	0.54643	0.558548	0.509519	0.644433	0.772098	0.583887
268	0.585258	0.616267	0.557073	0.634762	0.881539	0.649984
269	0.503245	0.527198	0.459244	0.538707	0.766556	0.584702
270	0.447836	0.485345	0.43965	0.536862	0.782557	0.550571
271	0.527627	0.654021	0.489948	0.70599	0.805208	0.640341
272	0.473583	0.527506	0.459794	0.591099	0.688409	0.52075
273	0.439227	0.437615	0.435754	0.47145	0.640774	0.489784
274	0.444279	0.465492	0.443058	0.468446	0.716273	0.501817
275	0.426091	0.44982	0.424511	0.403193	0.679244	0.498313
276	0.522918	0.537	0.498648	0.385445	0.726045	0.567762
277	0.648348	0.636596	0.55987	0.437874	0.849123	0.647982
278	0.699419	0.610914	0.523433	0.458431	1.07189	0.706699
279	0.478269	0.431871	0.478	0.423662	0.889374	0.586239
280	0.574458	0.522225	0.570161	0.508308	0.902969	0.671418
281	0.844046	0.702949	0.745813	0.668111	1.30277	0.880977
282	0.807402	0.686864	0.763159	0.679902	1.47005	0.961535
283	0.770741	0.670225	0.648613	0.739602	1.34128	1.09991
284	0.791082	0.71325	0.663278	0.787419	1.29347	1.12667
285	1.1165	0.904895	0.900768	1.05336	1.44902	1.51576
286	1.36757	1.01629	1.2141	1.35336	1.50567	1.6631
287	1.02989	0.758427	0.929534	1.02618	1.23719	1.30133
288	1.29365	0.779501	0.883612	1.21197	1.23581	1.35127
289	1.04063	0.795504	0.863595	1.31682	1.37742	1.55343
290	0.851697	0.644021	0.691788	1.07458	1.02508	1.19458
291	0.769076	0.557352	0.610021	0.951699	0.894971	1.16148
292	0.860855	0.693784	0.729528	1.03587	1.14517	1.32294
293	0.824297	0.695519	0.728279	0.937827	1.1016	1.1989
294	0.630667	0.573407	0.561634	0.692335	0.814125	0.91026
295	0.675251	0.618822	0.620466	0.788245	0.978378	1.13566
296	0.877033	0.822009	0.839614	0.967414	1.29717	1.33305
297	0.832739	0.842923	0.811255	0.89817	1.17941	1.14993
298	0.748481	0.7532	0.701716	0.826832	1.10827	1.08772
299	0.604364	0.633292	0.569276	0.614841	0.838091	0.829732
300	0.537853	0.559739	0.517969	0.631456	0.762917	0.857403
301	0.647102	0.608371	0.570283	0.732087	0.843235	0.771713
302	0.593239	0.555102	0.555615	0.744595	0.733095	0.698223
303	0.579132	0.560983	0.570059	0.663548	0.693192	0.695239
304	0.622786	0.575547	0.544	0.602827	0.629977	0.739141
305	0.556231	0.492334	0.434965	0.529513	0.587589	0.53015
306	0.61051	0.562669	0.471097	0.57862	0.603499	0.51451
307	0.582417	0.527068	0.456179	0.495932	0.536996	0.499757
308	0.539825	0.498097	0.459574	0.434942	0.50553	0.494133
309	0.598451	0.582719	0.577649	0.543961	0.580846	0.555552
310	0.683132	0.643544	0.688441	0.686189	0.670746	0.668182
311	0.679694	0.683324	0.68409	0.682373	0.642187	0.693076
312	0.49923	0.575751	0.508632	0.473002	0.452841	0.504962
313	0.425021	0.39287	0.392198	0.379363	0.453701	0.404185
314	0.412728	0.378048	0.360388	0.357394	0.420259	0.366624
315	0.398532	0.347909	0.395844	0.369354	0.408884	0.343557
316	0.454719	0.361894	0.36201	0.441647	0.467815	0.345116
317	0.395365	0.323865	0.372137	0.404969	0.449051	0.328907
318	0.395315	0.333502	0.530128	0.360264	0.447097	0.339118
319	0.478742	0.342832	0.40391	0.402883	0.393761	0.337211
320	0.414966	0.350782	0.351499	0.354941	0.366781	0.362215
321	0.417412	0.427265	0.421371	0.412711	0.441021	0.425872
322	0.43074	0.457288	0.476916	0.466941	0.502387	0.450352
323	0.530151	0.548864	0.579857	0.539371	0.638651	0.53969
324	0.698014	0.729847	0.7003	0.756097	0.88249	0.751081
325	1.0474	1.11806	1.148	1.02939	1.26568	1.23871
326	1.34941	1.45636	1.49936	1.38431	1.62125	1.85453
327	1.07847	1.02965	0.949453	0.988577	1.12416	1.29777
328	0.69205	0.70252	0.658194	0.682315	0.798771	0.798166
329	0.535592	0.579622	0.599707	0.617448	0.654674	0.597786
330	0.449085	0.388054	0.430752	0.403805	0.474463	0.381401
331	0.462623	0.431403	0.488249	0.391326	0.44513	0.400956
332	0.585964	0.422484	0.4753	0.394812	0.664164	0.401727
333	0.676303	0.450675	0.558309	0.424788	0.92695	0.473476
334	1.10725	0.615893	0.552741	0.483268	1.99481	0.607905
335	1.35901	0.720885	0.58776	0.543471	2.7912	0.582598
336	1.41053	0.56172	0.514765	0.485488	3.40379	0.511953
337	1.74075	0.813838	0.683102	0.542048	2.09143	0.669261
Average RMSD	0.713986	0.678634	0.689769	0.717582	0.786456	0.708756
