# Supplementary material for: Identification of Potential Druggable Targets and Structure-Based Virtual Screening for Drug-like Molecules against the Shrimp Pathogen Enterocytozoon hepatopenaei
Source: Int J Mol Sci. 2023 Jan 11;24(2):1412. doi: 10.3390/ijms24021412 (PMC9867128; doi:10.3390/ijms24021412)
Supplement: Supplementary file 1 [file ijms-24-01412-s001.zip › Table S8.xlsx]

## Sheet: Sheet1
Table S8 Details experimental details and scientific evidence on screened drug-like compounds
Molecules	Status	Similar Drug molecules	Similarity index	Drug Types	Compound Key	Standard Type	Assay ChEMBL ID	Assay Description	Assay Organism	Target ChEMBL ID	Target Name	Target Organism	Document ChEMBL ID	Scientific Literature
CHEMBL133039	Preclinical stage	Trepibutone	0.61	Experimental	27	IP	CHEMBL697703	Experimentally determined perceived intensity of compound at a concentration of 2000 ppm (mean value)	Homo sapiens	CHEMBL372	Homo sapiens	Homo sapiens	CHEMBL1121813	J. Med. Chem. (1981) 24:408-428	10.1021/jm00136a011
CHEMBL3703838	Preclinical stage	Dapagliflozin	0.7	Approved	BDBM159441	IC50	CHEMBL3705440	For sodium-dependent glucose transport assay, cells expressing hSGLT2	Homo sapiens	CHEMBL3884	Sodium/glucose cotransporter 2	Homo sapiens	CHEMBL3639134	J. Pharmacol. Exp. Ther. 2007, 320, 323-330	10.1124/jpet.106.110296
ZINC000002243083	Research	Naphthalene Trisulfonate	0.78	Experimental					Homo sapiens		Tyrosine-protein phosphatase 1	Homo sapiens		J. Appl. Electrochem. 2005, 815-820	10.1007/s10800-005-1629-4
CHEMBL3140193	Preclinical stage	Glucoraphanin	0.65	Investigational	9g	Activity	CHEMBL3130454	Antiinflammatory activity in human THP1 cells assessed as inhibition of LPS-induced TNF-alpha release measured as TNF-alpha level at 10 uM after 4hrs by ELISA relative to control	Homo sapiens	CHEMBL614245	THP-1	Homo sapiens	CHEMBL3124887	Bioorg. Med. Chem. (2013) 21:5945-5954	10.1016/j.bmc.2013.07.049
CHEMBL2132563	Preclinical stage	Cenerimod	0.59	Investigational	SID103076280	Potency	CHEMBL2114807	qHTS Assay to Identify Small Molecule Activators of BRCA1 Expression.	Homo sapiens	CHEMBL5990	Breast cancer type 1 susceptibility protein	Homo sapiens	CHEMBL1201862
CHEMBL48494	Preclinical stage	13-deoxydoxorubicin	0.61	Investigational	10a	MIC	CHEMBL809626	Compound was tested for antibacterial activity against Staphylococcus aureus WSU-196E	Staphylococcus aureus	CHEMBL352	Staphylococcus aureus	Staphylococcus aureus	CHEMBL1123433	J. Med. Chem. (1986) 29:1709-1714	10.1021/jm00159a024
CHEMBL1162979	Preclinical stage	Alloin	0.55	Approved	8	Activity	CHEMBL973909	Antifungal activity against Trichophyton rubrum	Trichophyton rubrum	CHEMBL612649	Trichophyton rubrum	Trichophyton rubrum	CHEMBL1155603	J. Nat. Prod. (2000) 63:1373-1376	10.1021/np000086+
CHEMBL133039	Preclinical stage	Trepibutone	0.61	Experimental	27	IP	CHEMBL697703	Experimentally determined perceived intensity of compound at a concentration of 2000 ppm (mean value)	Homo sapiens	CHEMBL372	Homo sapiens	Homo sapiens	CHEMBL1121813	J. Med. Chem. (1981) 24:408-428	10.1021/jm00136a011
CHEMBL1091856	Research	Epirubicin	0.45	Approved	20	Activity	CHEMBL1104445	Inhibition of FPPS in rat liver S10 supernatant assessed as conversion of (R,S)-[2-14C]mevalonic acid to [14C]squalene at 1 uM after 60 mins	Rattus norvegicus	CHEMBL1075093	Farnesyl pyrophosphate synthase	Rattus norvegicus	CHEMBL1156999	Bioorg. Med. Chem. (2010) 18:2428-2438	10.1016/j.bmc.2010.02.058
CHEMBL525202	Preclinical stage	Pramipexole	0.47	Approved	48	IC50	CHEMBL1005625	Inhibition of recombinant galectin 1 in human O type red blood cells by hemagglutinination assay	No Data	CHEMBL4915	Galectin-1	Homo sapiens	CHEMBL1156608	Bioorg. Med. Chem. (2008) 16:7811-7823	10.1016/j.bmc.2008.06.044
CHEMBL3674540	Preclinical stage	PF-04217903	0.69	Investigational	BDBM99273	IC50	CHEMBL3705294	The kinase assay is based on the LanthaScreen technology. LanthaScreen is the detection of Time-Resolved Fluorescence Resonance Energy Transfer (TR-FRET) using lanthanide chelates	Homo sapiens	CHEMBL3717	Hepatocyte growth factor receptor	Homo sapiens	CHEMBL3638663
CHEMBL1683320	Research	3-Acetylpyridine Adenine Dinucleotide	0.55	Experimental	6c	Inhibition	CHEMBL1687574	Inhibition of Escherichia coli K-12 recombinant NAD-dependent malic enzyme at 0.2 mM	Escherichia coli K-12	CHEMBL1687685	NADP-dependent malic enzyme	Escherichia coli (strain K12)	CHEMBL1681738	Bioorg. Med. Chem. Lett. (2011) 21:1667-1669	10.1016/j.bmcl.2011.01.107
CHEMBL391279	Preclinical stage	N-Ethyl-5'-Carboxamido Adenosine	0.77	Experimental	15	EC50	CHEMBL898446	Agonist activity at human adenosine A3 receptor after 15 to 30 mins	Homo sapiens	CHEMBL256	Adenosine A3 receptor	Homo sapiens	CHEMBL1149615	Bioorg. Med. Chem. (2007) 15:5440-5447	10.1016/j.bmc.2007.05.056
CHEMBL4078273	Preclinical stage	Polydatin	0.65	Approved	8o	Ki	CHEMBL4006739	Inhibition of Mycobacterium tuberculosis T6PP using T6P as substrate by Lineweaver-Burk plot analysis	Mycobacterium tuberculosis	CHEMBL612545	Unchecked	Mycobacterium tuberculosis	CHEMBL4004850	Eur J Med Chem (2017) 128:274-286	10.1016/j.ejmech.2017.02.001
ZINC000031750813	Research	Not found
CHEMBL1966988	Research	Sulfaguanidine	0.56	Experimental	SID531765	GI50	CHEMBL1963911	NCI human tumor cell line growth inhibition assay. Data for the CAKI-1 Renal cell line.	Homo sapiens	CHEMBL614067	CAKI-1	Homo sapiens	CHEMBL1201862
CHEMBL340488	Preclinical stage	Tiazofurine	0.59	Experimental	11	IC50	CHEMBL708592	Compound tested for the inhibition of Escherichia coli Leucyl-tRNA synthetase	Escherichia coli	CHEMBL3258	Leucyl-tRNA synthetase	Homo sapiens	CHEMBL1131923	Bioorg. Med. Chem. Lett. (1999) 9:375-380	10.1016/s0960-894x(98)00738-0
ZINC000016682862	Research	Bleomycin	0.57	Approved					Homo sapiens		Epoxide hydrolase 1	Homo sapiens
ZINC000828645375	Research	Ethoxypropanoic Acid	0.52	Experimental
CHEMBL3901573	Preclinical stage	Mefloquine	0.37	Approved	I-23	IC50	CHEMBL3880354	Inhibition of recombinant human NAEalpha/N-terminal His-tagged NAEbeta expressed in baculovirus infected insect Sf9 cells	Homo sapiens	CHEMBL3831283	NEDD8 activating enzyme	Homo sapiens	CHEMBL3879911	Patent No. WO-2008019124-A1
CHEMBL3913373	Preclinical stage	Nilutamide	0.55	Approved	136	Activity	CHEMBL3863743	Cytotoxicity against human LN229 cells assessed as concentration required for induction of cell death after 24 hrs	Homo sapiens	CHEMBL3879801	NON-PROTEIN TARGET	Homo sapiens	CHEMBL3862023	Bioorg Med Chem (2016) 24:6183-6193	10.1016/j.bmc.2016.09.074
CHEMBL1962731	Research	Amiloride	0.58	Approved	17	Activity	CHEMBL3821343	Displacement of [3H]ZM-241,385 from human N-terminal FLAG-tagged adenosine A2A receptor W246A 6.48 mutant expressed in HEK293 cell membrane	Homo sapiens	CHEMBL2094257	Adenosine A2 receptor	Homo sapiens	CHEMBL3817744	J. Med. Chem. (2016) 59:4769-4777	10.1021/acs.jmedchem.6b00142
CHEMBL3142997	Research	Thymidine monophosphate	0.846	Experimental	34	ID50	CHEMBL689432	Concentration required to reduce the number of viral plaques in vivo cell monolayers of herpes simplex virus type 2.	Homo sapiens	CHEMBL370	Human herpesvirus 2	Human herpesvirus 2	CHEMBL1124390	J. Med. Chem. (1989) 32:367-374	10.1021/jm00122a014
ZINC000199197855	Research	methyl L-phenylalaninate	0.61	Experimental				Cytotoxicity against human caneer cells	Homo sapiens		Aminopeptidase N	Homo sapiens
ZINC000016682972	Preclinical stage	2-(Beta-D-Glucopyranosyl)-5-Methyl-1,2,3-Benzimidazole	0.58	Experimental
